# Supplementary material for: Asymmetric Friedel−Crafts reaction of unsaturated carbonyl-tethered heteroarenes via vinylogous activation of Pd0-π-Lewis base catalysis
Source: Royal Society of Chemistry journal article supplement (doi:10.1039/d3sc03996j), 2023-01-01
Supplement: d3sc03996j1.pdf [file d3sc03996j1.pdf]

# Asymmetric Friedel–Crafts reaction of unsaturated carbonyl-tethered heteroarenes via vinylogous activation of Pd<sup>0</sup>- $\pi$ -Lewis base catalysis

Bo Jiang,<sup>a</sup> Wu-Tao Gui,<sup>a</sup> Hao-Tian Wang,<sup>a</sup> Ke Xie,<sup>a</sup> Zhi-Chao Chen,<sup>a</sup> Lei Zhu,<sup>b</sup> Qin Ouyang,<sup>\*b</sup> Wei Du,<sup>\*a</sup> and Ying-Chun Chen<sup>\*a,b</sup>

<sup>a</sup> Key Laboratory of Drug-Targeting and Drug Delivery System of the Ministry of Education and Sichuan Research Center for Drug Precision Industrial Technology, West China School of Pharmacy, Sichuan University, Chengdu 610041, China.

<sup>b</sup> College of Pharmacy, Third Military Medical University, Shapingba, Chongqing 400038, China.  
Email: ouyangq@tmmu.edu.cn; duweiyb@scu.edu.cn; ycchen@scu.edu.cn

## Supplementary Information

### Table of contents

|                                                                                                                                     |      |
|-------------------------------------------------------------------------------------------------------------------------------------|------|
| 1. General methods .....                                                                                                            | S2   |
| 2. Procedure for the preparation of 2-indolyl propiolates .....                                                                     | S4   |
| 3. Optimisations for the asymmetric [3 + 2] annulation of 2-indolyl propiolates <b>1</b> with enone <b>2a</b> .....                 | S7   |
| 4. Optimisations for the asymmetric [3 + 2] annulation of 2-indolyl propiolate <b>1b</b> with enone <b>5a</b> .....                 | S8   |
| 5. Optimisations for the asymmetric Friedel–Crafts reaction of 2-alkenyl indole <b>7</b> with imine <b>8a</b> .....                 | S9   |
| 6. Optimisations for the asymmetric Friedel–Crafts reaction of 2-alkenyl pyrrole <b>10</b> with imine <b>8a</b> .....               | S11  |
| 7. Optimisations for the asymmetric Friedel–Crafts reaction of 2-alkenyl furan <b>12</b> with 1-azadiene <b>13</b> .....            | S13  |
| 8. General procedure for the asymmetric [3 + 2] or [3 + 4] annulations of 2-indolyl propiolates <b>1</b> with enones <b>2</b> ..... | S14  |
| 9. General procedure for the asymmetric [3 + 2] annulations of 2-indolyl propiolate <b>1b</b> with enones <b>5</b> .....            | S40  |
| 10. General procedure for the asymmetric Friedel–Crafts reaction of 2-alkenyl indole <b>7</b> with imines <b>8</b> .....            | S44  |
| 11. General procedure for the asymmetric Friedel–Crafts reaction of 2-alkenyl pyrroles <b>10</b> with imines <b>8</b> .....         | S63  |
| 12. General procedure for the asymmetric Friedel–Crafts reaction of 2-alkenyl furan <b>12</b> with 1-azadiene <b>13</b> .....       | S68  |
| 13. Asymmetric reaction on a 1.0 mmol scale .....                                                                                   | S69  |
| 14. Transformations of products .....                                                                                               | S70  |
| 15. More investigation on substrates scope .....                                                                                    | S76  |
| 16. X-ray crystallographic data and structural refinement .....                                                                     | S79  |
| 17. Mechanism studies .....                                                                                                         | S87  |
| 18. NMR, HRMS spectra and HPLC chromatograms .....                                                                                  | S103 |
| 19. Computational details .....                                                                                                     | S363 |

## 1. General methods

$^1\text{H}$  NMR (400 or 600 MHz) and  $^{13}\text{C}$  NMR (100 or 150 MHz) spectra were recorded on Varian INOVA-400/54, Agilent DD2-600/54 or Bruker Ascend<sup>TM</sup> 400 instruments (Chemical shifts were reported in ppm from tetramethylsilane with the solvent resonance as the internal standard in  $\text{CDCl}_3$  solution, unless otherwise noted). The following abbreviations were used to explain the multiplicities: s = singlet, d = doublet, t = triplet, dd = double doublet, dt = double triplet; td = triple doublet; m = multiplet, br = broad, and coupling constants ( $J$ ) are reported in Hertz (Hz). High resolution mass spectra (HRMS) were recorded on a Waters SYNAPT G2, Agilent G1969-85000 or Shimadzu LCMS-IT-TOF using a time-of-flight mass spectrometer equipped with electrospray ionization (ESI) source. X-ray diffraction experiments were carried out on an Agilent Gemini or Bruker APEX-II CCD diffractometer, and the data obtained were deposited at the Cambridge Crystallographic Data Centre (CCDC 2251805–2251810). In each case, diastereomeric ratio was determined by  $^1\text{H}$  NMR analysis and enantiomeric excess was determined by HPLC (Agilent Technologies: 1220 Infinity II, 1200 Series, 1260 Infinity) analysis on a chiral column in comparison with authentic racemate, using a Daicel Chiralpak AD-H Column (250  $\times$  4.6 mm), Chiralpak IA Column (250  $\times$  4.6 mm), Chiralpak IB Column (250  $\times$  4.6 mm), Chiralpak IC Column (250  $\times$  4.6 mm), Chiralpak ID Column (250  $\times$  4.6 mm), Chiralpak IE Column (250  $\times$  4.6 mm), Chiralcel IF Column (250  $\times$  4.6 mm). UV detection was monitored at 254 nm. The specific optical rotation was obtained from Rudolph Research Analytical Autopol I automatic polarimeter in  $\text{CHCl}_3$  solution at 25  $^\circ\text{C}$ . The melting point was obtained from WRX-4 Mel-Temp apparatus. Column chromatography was performed on silica gel (200–300 mesh) eluting with ethyl acetate (EtOAc) and petroleum ether or dichloromethane (DCM)/methanol (MeOH). TLC was performed on glass-backed silica plates. UV light,  $\text{I}_2$ , and solution of potassium permanganate were used to visualize products or starting materials. All chemicals were used without purification as commercially available unless otherwise noted. Petroleum ether (60–90  $^\circ\text{C}$ ) was redistilled. 2-Indolyl propiolate **1**,<sup>1</sup> enones **2**,<sup>2</sup> enones **5**,<sup>3</sup> 2-indolyl acrylates **7**,<sup>4</sup> imines **8**,<sup>5</sup> 2-pyrrolyl acrylates **10**,<sup>6</sup> 2-furyl acrylate **12**,<sup>7</sup> 1-azadiene **13**,<sup>8</sup> **L2**, **L3**,<sup>9</sup> bifunctional chiral ligands **L6** and **L7**,<sup>10</sup> were synthesized following the literature procedures.

## References

1. H. K. Grover, T. P. Lebold and M. A. Kerr, *Org. Lett.*, 2011, **13**, 220.
2. (a) S. J. Deshpande, P. R. Leger and S. R. Sieck, *Tetrahedron Lett.*, 2012, **53**, 1772; (b) R. Maity

- and S. C. Pan, *Eur. J. Org. Chem.*, 2017, 871.
3. E. Li, Y. Huang, L. Liang and P. Xie, *Org. Lett.*, 2013, **15**, 3138.
  4. (a) F. Sha, Y. Tao, C.-Y. Tang, F. Zhang and X.-Y. Wu, *J. Org. Chem.*, 2015, **80**, 8122; (b) K. Zhang, X. Xu, J. Zheng, H. Yao, Y. Huang and A. Lin, *Org. Lett.*, 2017, **19**, 2596.
  5. (a) S. Morales, F. G. Guijarro, J. L. García Ruano and M. B. Cid, *J. Am. Chem. Soc.*, 2014, **136**, 1082; (b) H. Cai, Y. Zhou, D. Zhang, J. Xu and H. Liu, *Chem. Commun.*, 2014, **50**, 14771.
  6. (a) D. G. Stark, P. Williamson, E. R. Gayner, S. F. Musolino, R. W. F. Kerr, J. E. Taylor, A. M. Z. Slawin, T. J. C. O'Riordan, S. A. Macgregor and A. D. Smith, *Org. Biomol. Chem.*, 2016, **14**, 8957; (b) D. Bensinger, D. Stubba, A. Cremer, V. Kohl, T. Walßner, J. Stuckert, V. Engemann, K. Stegmaier, K. Schmitz and B. Schmidt, *J. Med. Chem.*, 2019, **62**, 2428.
  7. A. E. Bober, J. T. Proto and K. M. Brummond, *Org. Lett.*, 2017, **19**, 1500.
  8. Z. Q. Rong, M. Wang, C. H. E. Chow and Y. Zhao, *Chem. Eur. J.*, 2016, **22**, 9483.
  9. B. M. Trost, D. J. Michaelis, J. Charpentier and J. Xu, *Angew. Chem., Int. Ed.*, 2012, **51**, 204.
  10. (a) X.-X. Yang, R.-J. Yan, G.-Y. Ran, C. Chen, J.-F. Yue, X. Yan, Q. Ouyang, W. Du and Y.-C. Chen, *Angew. Chem., Int. Ed.*, 2021, **60**, 26762; (b) C. Chen, X.-X. Yang, Z. Zhao, B. Han, W. Du and Y.-C. Chen, *Chem. Commun.*, 2022, **58**, 5502.

## 2. Procedure for the preparation of 2-indolyl propiolates

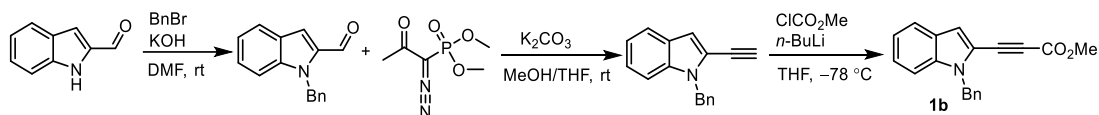

To a stirred solution of 1*H*-indole-2-carbaldehyde (1.45 g, 10.0 mmol, 1.0 equiv) in DMF (10 mL) was added KOH (1.12 g, 20.0 mmol, 2.0 equiv) at 0 °C. The mixture was stirred for 20 min, and benzyl bromide (1.42 mL, 12.0 mmol, 1.2 equiv) was added dropwise. The resulting mixture was stirred at rt for 2 h before the reaction was quenched by pouring it into ice water. The mixture was extracted with EtOAc (3 × 20 mL). The combined organic layers were washed with water (20 mL) and brine (30 mL), dried over anhydrous Na<sub>2</sub>SO<sub>4</sub> and evaporated under reduced pressure. The residue was purified by column chromatography (SiO<sub>2</sub>, petroleum ether/EtOAc = 20/1) to give 1-benzyl-1*H*-indole-2-carbaldehyde as a colorless oil (2.12 g, 90% yield).

1-Benzyl-1*H*-indole-2-carbaldehyde (2.12 g, 9.00 mmol, 1.0 equiv) was dissolved in MeOH/THF (20/10 mL), and K<sub>2</sub>CO<sub>3</sub> (3.73 g, 27.0 mmol, 3.0 equiv) was added at 0 °C. Then dimethyl (1-diazo-2-oxopropyl)phosphonate (1.62 mL, 10.8 mmol, 1.2 equiv) was added by dropwise before the mixture was allowed to warm to room temperature. The mixture was stirred until completion (monitored by TLC). The reaction was quenched with water and extracted with EtOAc (3 × 20 mL). The combined organic layers were washed with water (20 mL) and brine (30 mL), dried over anhydrous Na<sub>2</sub>SO<sub>4</sub> and evaporated under reduced pressure. The residue was purified by column chromatography (SiO<sub>2</sub>, petroleum ether/EtOAc = 30/1) to give 1-benzyl-2-ethynyl-1*H*-indole as a yellow solid (1.30 g, 62% yield).

To a solution of 1-benzyl-2-ethynyl-1*H*-indole (1.30 g, 5.60 mmol, 1.0 equiv) in THF was added *n*-BuLi (2.4 M, 2.80 mL, 6.72 mmol, 1.2 equiv) dropwise at -78 °C under argon atmosphere. The mixture was stirred for 30 min. Methyl chloroformate (0.63 mL, 6.7 mmol, 1.2 equiv) was added and the mixture was stirred at the same temperature for 3 h. Then the solution was warmed to room temperature, quenched with water and extracted with EtOAc (3 × 20 mL). The combined organic layers were washed with water (20 mL) and brine (30 mL), dried over anhydrous Na<sub>2</sub>SO<sub>4</sub> and evaporated under reduced pressure. The residue was purified by column chromatography (SiO<sub>2</sub>, petroleum ether/EtOAc = 15/1) to give **1b**.

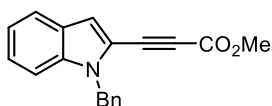

**Compound 1b:** yellow solid, 1.32 g, 82% yield; mp 113–115 °C; <sup>1</sup>H NMR (600 MHz, CDCl<sub>3</sub>): δ (ppm) 7.65 (s, 1H), 7.39–7.23 (m, 5H), 7.22–7.06 (m,

4H), 5.48 (s, 2H), 3.85 (s, 3H);  $^{13}\text{C NMR}$  (150 MHz,  $\text{CDCl}_3$ ):  $\delta$  (ppm) 154.2, 137.6, 137.0, 128.7, 127.7, 127.0, 126.9, 125.0, 121.9, 120.9, 118.2, 113.3, 110.5, 87.4, 79.1, 52.8, 48.3; **HRMS** (ESI-TOF)  $m/z$ :  $[\text{M} + \text{H}]^+$  Calcd for  $\text{C}_{19}\text{H}_{16}\text{NO}_2^+$  290.1176; Found 290.1186.

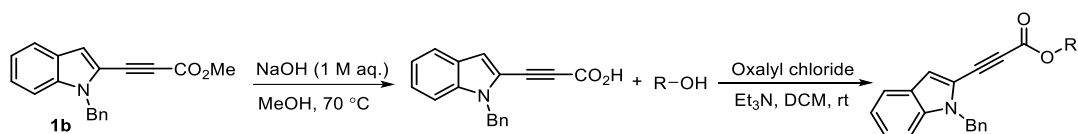

To a stirred solution of **1b** (2.89 g, 10.0 mmol, 1.0 equiv) in MeOH (20 mL) was added aqueous NaOH (1 M, 30 mL, 30 mmol, 3.0 equiv) at rt. The mixture was heated at 70 °C for 5 h. After completion, the solvent was removed in vacuo, diluted with water and acidified with aqueous HCl (1 M, 30 mL). The mixture was extracted with EtOAc (3 × 20 mL). The combined organic layers were washed with brine (30 mL), dried over anhydrous  $\text{Na}_2\text{SO}_4$  and concentrated to give crude carboxylic acid (2.56 g, 93% yield).

To a solution of carboxylic acid (275 mg, 1.00 mmol, 1.0 equiv) in DCM (10 mL) and  $\text{Et}_3\text{N}$  (0.26 mL, 2.0 mmol, 2.0 equiv) was added oxalyl chloride (102  $\mu\text{L}$ , 1.30 mmol, 1.3 equiv) dropwise at 0 °C under argon atmosphere. The mixture was stirred for 5 min. Estrone or prochlorperazine (1.10 mmol, 1.1 equiv) was added and the mixture was stirred at rt for 1 h. After completion, the solvent was removed in vacuo, and the residue was purified by column chromatography ( $\text{SiO}_2$ , petroleum ether/EtOAc = 5/1) to give pure product.

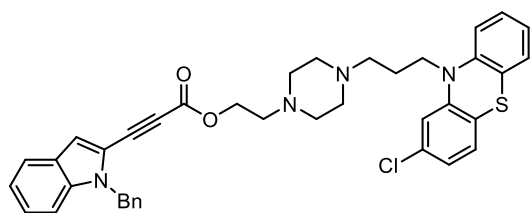

**Compound 11**: yellow solid, 426 mg, 64% yield; mp 48–49 °C;  $^1\text{H NMR}$  (400 MHz,  $\text{CDCl}_3$ ):  $\delta$  (ppm) 7.54 (d,  $J = 8.0$  Hz, 1H), 7.22–7.12 (m, 5H), 7.10–6.99 (m, 6H), 6.91 (d,  $J = 8.0$  Hz, 1H), 6.86–6.74 (m, 4H), 5.36 (s, 2H),

4.25 (t,  $J = 5.9$  Hz, 2H), 3.80 (t,  $J = 6.8$  Hz, 2H), 2.60 (t,  $J = 5.9$  Hz, 2H), 2.47–2.31 (m, 10H), 1.88–1.78 (m, 2H);  $^{13}\text{C NMR}$  (100 MHz,  $\text{CDCl}_3$ ):  $\delta$  (ppm) 153.6, 146.4, 144.4, 137.6, 136.9, 133.1, 128.7, 127.8, 127.6, 127.43, 127.35, 127.0, 126.8, 125.0, 124.7, 123.4, 122.8, 122.2, 121.9, 120.9, 118.2, 115.8, 115.7, 113.2, 110.4, 87.5, 79.1, 63.3, 56.3, 55.4, 53.3, 53.1, 48.2, 45.3, 24.2; **HRMS** (ESI-TOF)  $m/z$ :  $[\text{M} + \text{H}]^+$  Calcd for  $\text{C}_{39}\text{H}_{38}\text{ClN}_4\text{O}_2\text{S}^+$  661.2399; Found 661.2402.

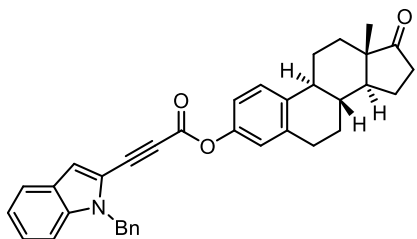

**Compound 1m:** yellow solid, 386 mg, 73% yield; mp 130–132 °C;

**<sup>1</sup>H NMR** (400 MHz, CDCl<sub>3</sub>): δ (ppm) 7.64 (d, *J* = 8.0 Hz, 1H), 7.34–7.21 (m, 6H), 7.20–7.10 (m, 4H), 6.95 (dd, *J* = 8.5, 2.5 Hz, 1H), 6.91 (d, *J* = 2.5 Hz, 1H), 5.43 (s, 2H), 2.90 (dd, *J* = 9.3, 4.3 Hz, 2H), 2.50 (dd, *J* = 18.9, 8.7 Hz, 1H), 2.44–2.34 (m, 1H), 2.31–

2.20 (m, 1H), 2.19–1.92 (m, 4H), 1.69–1.36 (m, 6H), 0.90 (s, 3H); **<sup>13</sup>C NMR** (100 MHz, CDCl<sub>3</sub>): δ (ppm) 220.7, 152.5, 148.1, 138.3, 138.1, 137.8, 137.0, 128.8, 127.8, 127.1, 127.0, 126.6, 125.4, 122.1, 121.5, 121.1, 118.7, 118.0, 114.1, 110.6, 87.5, 81.6, 50.5, 48.4, 48.0, 44.2, 38.0, 35.9, 31.6, 29.4, 26.3, 25.8, 21.6, 13.9; **HRMS** (ESI-TOF) *m/z*: [M + Na]<sup>+</sup> Calcd for C<sub>36</sub>H<sub>33</sub>NO<sub>3</sub>Na<sup>+</sup> 550.2353; Found 550.2359.

### 3. Optimisations for the asymmetric [3 + 2] annulations of 2-indolyl propiolates **1** with enone **2a**

**Table S1. Ligand screenings for the asymmetric [3 + 2] annulation of 2-indolyl propiolate **1a** with enone **2a**<sup>a</sup>**

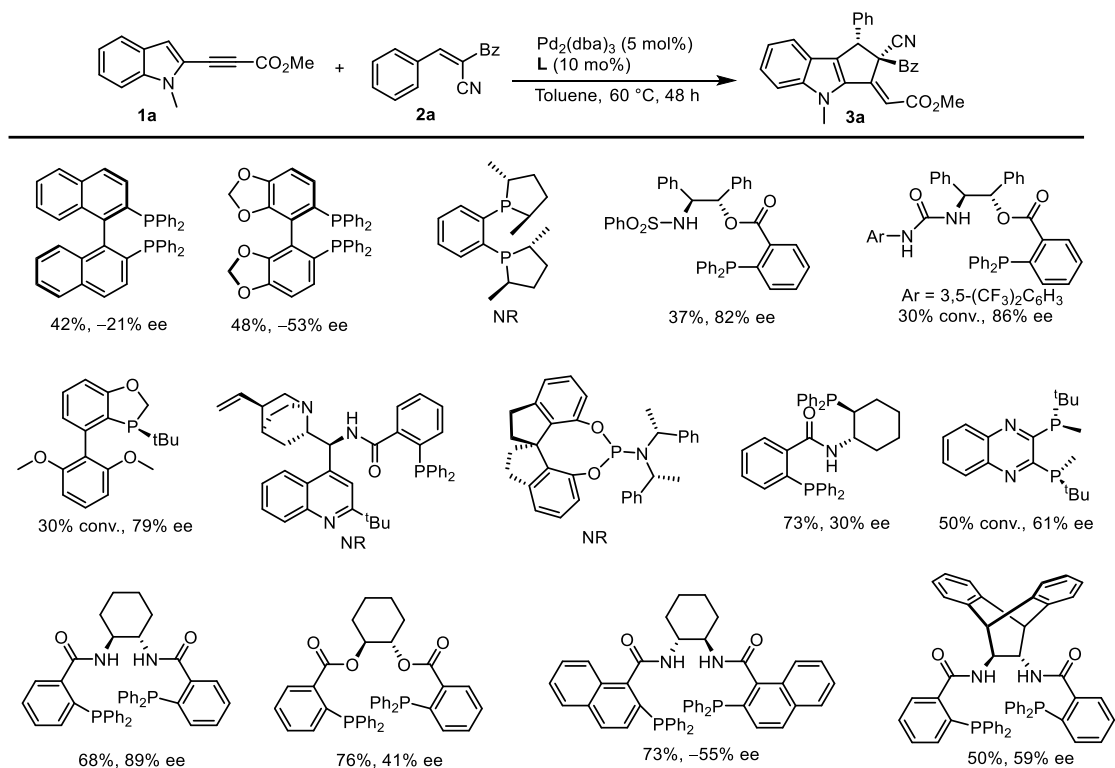

<sup>a</sup> Reactions were carried out with **1a** (0.025 mmol), **2a** (0.03 mmol), Pd<sub>2</sub>(dba)<sub>3</sub> (5 mol%) and L (10 mol%) in toluene (0.25 mL) at 60 °C under Ar.

**Table S2. Other condition screenings for the asymmetric [3 + 2] annulations of 2-indolyl propiolates **1** with enone **2a**<sup>a</sup>**

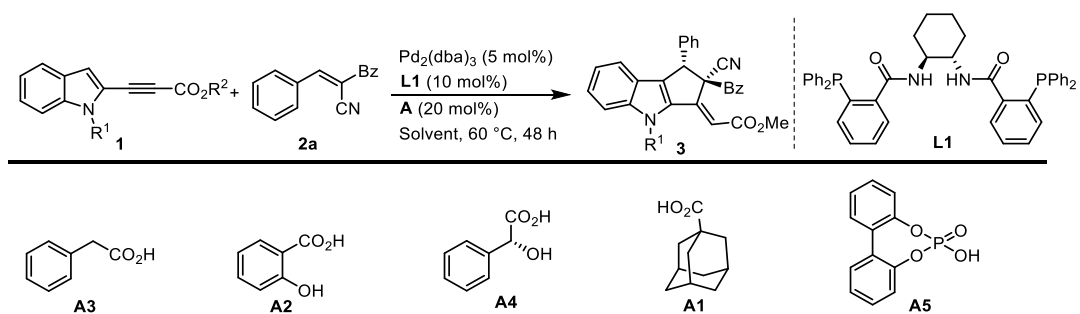

| Entry | R <sup>1</sup> , R <sup>2</sup> | A         | Solvent | Temp (°C) | Yield (%) <sup>b</sup> (conv.) | ee (%) <sup>c</sup> |
|-------|---------------------------------|-----------|---------|-----------|--------------------------------|---------------------|
| 1     | Me, Me                          | /         | Toluene | 60        | <b>3a</b> , 68                 | 89                  |
| 2     | Me, Me                          | <b>A3</b> | Toluene | 60        | <b>3a</b> , (80)               | 89                  |
| 3     | Me, Me                          | <b>A2</b> | Toluene | 60        | <b>3a</b> , (60)               | 88                  |
| 4     | Me, Me                          | <b>A4</b> | Toluene | 60        | <b>3a</b> , 52                 | 89                  |
| 5     | Me, Me                          | <b>A1</b> | Toluene | 60        | <b>3a</b> , 49 (90)            | 90                  |
| 6     | Me, Me                          | <b>A5</b> | Toluene | 60        | <b>3a</b> , nr                 | /                   |

|                   |                  |                                 |                |    |                 |    |
|-------------------|------------------|---------------------------------|----------------|----|-----------------|----|
| 7                 | Me, Me           | Na <sub>2</sub> CO <sub>3</sub> | Toluene        | 60 | <b>3a</b> , 61  | 86 |
| 8                 | Me, Me           | DIPEA                           | Toluene        | 60 | <b>3a</b> , 42  | 89 |
| 9                 | Me, Me           | TBAB                            | Toluene        | 60 | <b>3a</b> , 86  | 86 |
| 10                | Me, Me           | /                               | EtOAc          | 60 | <b>3a</b> , 46  | 81 |
| 11                | Me, Me           | /                               | MeCN           | 60 | <b>3a</b> , 93  | 30 |
| 12                | Me, Me           | /                               | <i>i</i> -PrOH | 60 | <b>3a</b> , 91  | 65 |
| 13                | Me, Me           | /                               | 1,4-Dioxane    | 60 | <b>3a</b> , 81  | 89 |
| 14                | Me, Me           | TBAB                            | 1,4-Dioxane    | 60 | <b>3a</b> , 89  | 84 |
| 15                | Me, <i>i</i> -Pr | TBAB                            | 1,4-Dioxane    | 60 | <b>3ah</b> , 51 | 79 |
| 16                | Me, Bn           | TBAB                            | 1,4-Dioxane    | 60 | <b>3ai</b> , 48 | 89 |
| 17                | Bn, Me           | TBAB                            | 1,4-Dioxane    | 60 | <b>3b</b> , 70  | 91 |
| 18                | Bn, Me           | /                               | 1,4-Dioxane    | 60 | <b>3b</b> , 49  | 92 |
| 19                | Bn, Me           | TBAB                            | 1,4-Dioxane    | 70 | <b>3b</b> , 70  | 91 |
| 20                | Bn, Me           | TBAB                            | 1,4-Dioxane    | 80 | <b>3b</b> , 69  | 89 |
| 21 <sup>d</sup>   | Bn, Me           | TBAB                            | 1,4-Dioxane    | 60 | <b>3b</b> , 81  | 92 |
| 22 <sup>d,e</sup> | Bn, Me           | TBAB                            | 1,4-Dioxane    | 60 | <b>3b</b> , 86  | 92 |
| 23 <sup>d,e</sup> | Bn, Me           | TBAI                            | 1,4-Dioxane    | 60 | <b>3b</b> , 81  | 91 |
| 24 <sup>d,e</sup> | Bn, Me           | TBAC                            | 1,4-Dioxane    | 60 | <b>3b</b> , 76  | 92 |
| 25 <sup>d,e</sup> | Bn, Me           | TBAHS                           | 1,4-Dioxane    | 60 | <b>3b</b> , 79  | 90 |
| 26 <sup>d,e</sup> | Bn, Me           | KBr                             | 1,4-Dioxane    | 60 | <b>3b</b> , 52  | 92 |

<sup>a</sup> Unless noted otherwise, reactions were carried out with **1** (0.025 mmol), **2a** (0.03 mmol), Pd<sub>2</sub>(dba)<sub>3</sub> (5 mol%), **L1** (10 mol%) and additive **A** (20 mol%) in solvent (0.25 mL) at 60 °C under Ar. <sup>b</sup> Yield of the isolated product. <sup>c</sup> Determined by HPLC analysis on a chiral stationary phase. <sup>d</sup> *C* = 0.2 M. <sup>e</sup> The ratio of **1b/2a** was 1/1.3.

#### 4. Optimisations for the asymmetric [3 + 2] annulation of 2-indolyl propiolate **1b** with enone **5a**

Table S3. Screenings for the asymmetric [3 + 2] annulation of 2-indolyl propiolate **1b** with enone **5a**<sup>a</sup>

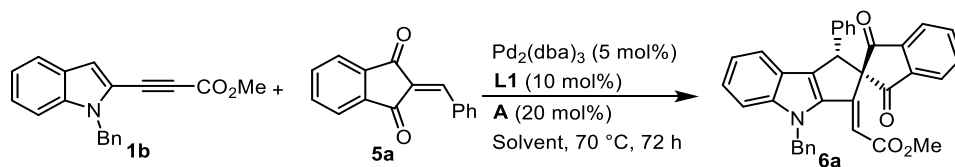

| Entry          | <b>A</b> | Solvent     | Temp (°C) | Yield (%) <sup>b</sup> | ee (%) <sup>c</sup> |
|----------------|----------|-------------|-----------|------------------------|---------------------|
| 1 <sup>d</sup> | /        | MeCN        | 70        | 62                     | /                   |
| 2              | /        | MeCN        | 70        | 60                     | 42                  |
| 3              | /        | Toluene     | 70        | 84                     | 90                  |
| 4              | /        | 1,4-Dioxane | 70        | 80                     | 89                  |
| 5              | /        | MeOH        | 70        | 99                     | 3                   |



|                |      |         |    |    |    |
|----------------|------|---------|----|----|----|
| 6              | /    | DCE     | 70 | 65 | 69 |
| 7 <sup>e</sup> | /    | Toluene | 70 | 81 | 90 |
| 8 <sup>e</sup> | TBAB | Toluene | 70 | 76 | 89 |

<sup>a</sup> Unless noted otherwise, reactions were carried out with **1b** (0.025 mmol), **5a** (0.03 mmol), Pd<sub>2</sub>(dba)<sub>3</sub> (5 mol%), **L1** (10 mol%) and additive **A** (20 mol%) in solvent (0.125 mL) at 70 °C under Ar. <sup>b</sup> Yield of the isolated product. <sup>c</sup> Determined by HPLC analysis on a chiral stationary phase. <sup>d</sup> With Pd(PPh<sub>3</sub>)<sub>4</sub> (10 mol%). <sup>e</sup> On a 0.1 mmol scale.

## 5. Optimisations for the asymmetric Friedel–Crafts reaction of 2-alkenyl indoles **7** with imine **8a**

**Table S4. Ligand screenings for the asymmetric Friedel–Crafts reaction of 2-alkenyl indole **7k** with imine **8a**<sup>a</sup>**

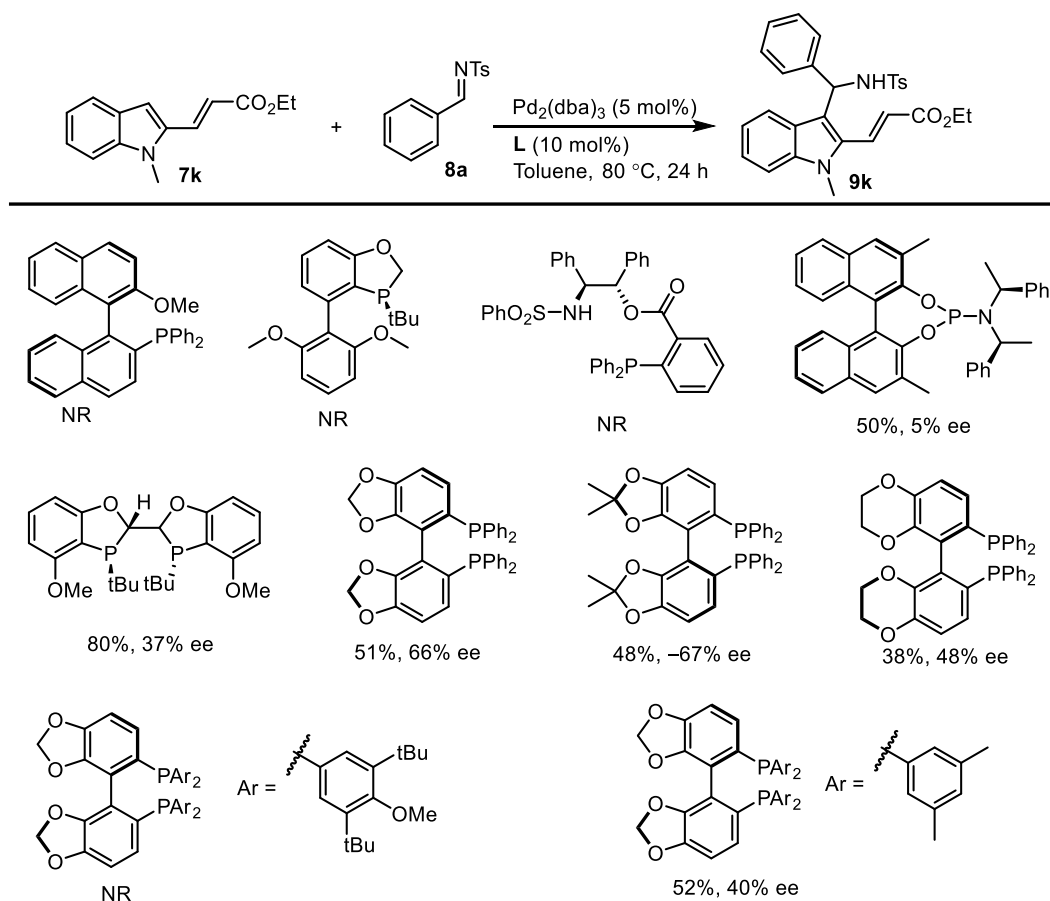

<sup>a</sup> Reactions were carried out with **7k** (0.025 mmol), **8a** (0.05 mmol), Pd<sub>2</sub>(dba)<sub>3</sub> (5 mol%) and **L** (10 mol%) in toluene (0.25 mL) at 80 °C for 24 h under Ar.

**Table S5. Ligand screenings for the asymmetric Friedel–Crafts reaction of 2-alkenyl indole **7a** with imine **8a**<sup>a</sup>**

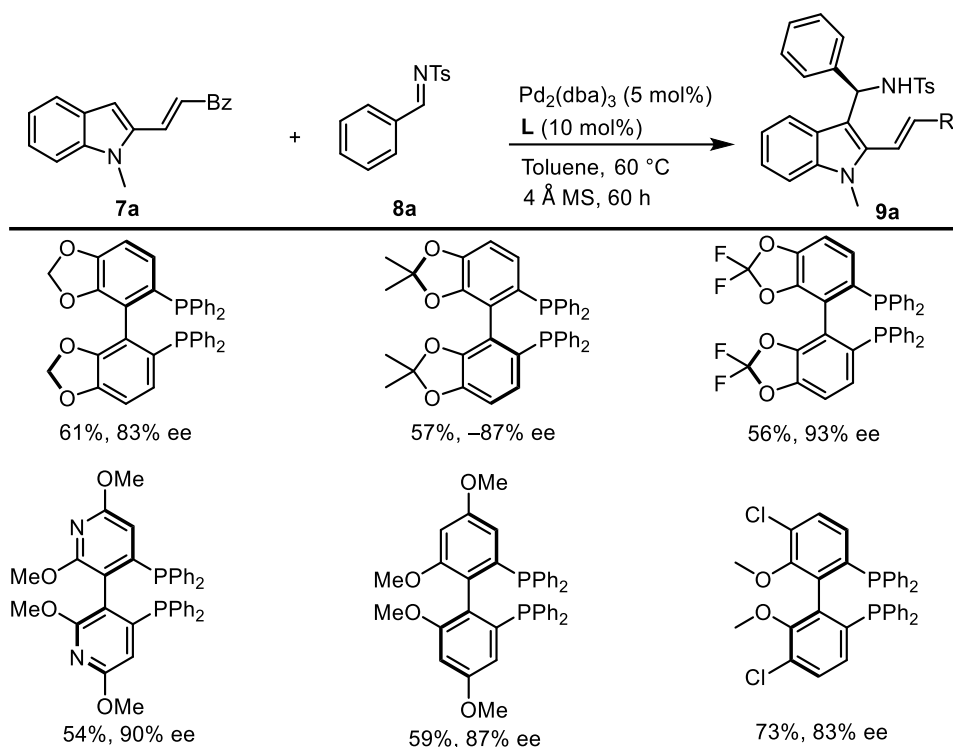

<sup>a</sup>Reactions were carried out with **7a** (0.025 mmol), **8a** (0.05 mmol), Pd<sub>2</sub>(dba)<sub>3</sub> (5 mol%), **L** (10 mol%) and 4 Å MS (10.0 mg) in toluene (0.25 mL) at 60 °C for 60 h under Ar.

**Table S6. Other condition screenings for the asymmetric Friedel–Crafts reaction of 2-alkenyl indole **7a** with imine **8a**<sup>a</sup>**

$\text{7a} + \text{8a} \xrightarrow[\text{Solvent, 60 } ^\circ\text{C}]{\text{Pd}_2(\text{dba})_3 \text{ (5 mol\%), L5 (10 mol\%), A, 4 \AA MS}} \text{9a}$

Additive A1: 
 Additive A2: 
 Additive A3: 
 Additive A4: 
 Additive A6: 
 Additive A7:

| Entry | A (mol%)       | Solvent | Temp (°C) | Yield (%) <sup>b</sup> | ee (%) <sup>c</sup> |
|-------|----------------|---------|-----------|------------------------|---------------------|
| 1     | <b>A3</b> (30) | Toluene | 60        | 92                     | 70                  |
| 2     | <b>A1</b> (30) | Toluene | 60        | 95                     | 86                  |
| 3     | <b>A6</b> (30) | Toluene | 60        | 57                     | 87                  |
| 4     | <b>A7</b> (30) | Toluene | 60        | 60                     | 45                  |
| 5     | <b>A2</b> (30) | Toluene | 60        | 93                     | 0                   |
| 6     | <b>A4</b> (30) | Toluene | 60        | 71                     | 93                  |
| 7     | <b>A1</b> (10) | Toluene | 60        | 90                     | 85                  |
| 8     | <b>A1</b> (10) | Toluene | 50        | 94                     | 90                  |
| 9     | <b>A1</b> (10) | Toluene | 40        | 62                     | 92                  |

|    |               |                   |    |    |    |
|----|---------------|-------------------|----|----|----|
| 10 | <b>A1</b> (5) | Toluene           | 50 | 90 | 92 |
| 11 | <b>A1</b> (5) | THF               | 50 | 32 | 92 |
| 12 | <b>A1</b> (5) | CHCl <sub>3</sub> | 50 | 65 | 87 |
| 13 | <b>A1</b> (5) | Xylene            | 50 | 93 | 92 |
| 14 | <b>A1</b> (5) | PhCF <sub>3</sub> | 50 | 97 | 67 |

<sup>a</sup> Unless noted otherwise, reactions were carried out with **7a** (0.025 mmol), **8a** (0.05 mmol), Pd<sub>2</sub>(dba)<sub>3</sub> (5 mol%), **L5** (10 mol%), additive **A** (mol%) and 4 Å MS (10.0 mg) in solvent (0.25 mL) at 60 °C for 60 h under Ar. <sup>b</sup> Yield of the isolated product. <sup>c</sup> Determined by HPLC analysis on a chiral stationary phase.

## 6. Optimisations for the asymmetric Friedel–Crafts reaction of 2-alkenyl pyrrole **10** with imine **8a**

At first, substrate **10d** with an *N*-methyl group was employed for the Friedel–Crafts reaction with **8a** under palladium catalysis. After extensive screenings, only low conversions and poor enantioselectivity were attained. Therefore, some other substrates were tested as well (see Table S7).

**Table S7. Ligand screenings for the asymmetric Friedel–Crafts reaction of 2-alkenyl pyrrole **10d** with imine **8a**<sup>a</sup>**

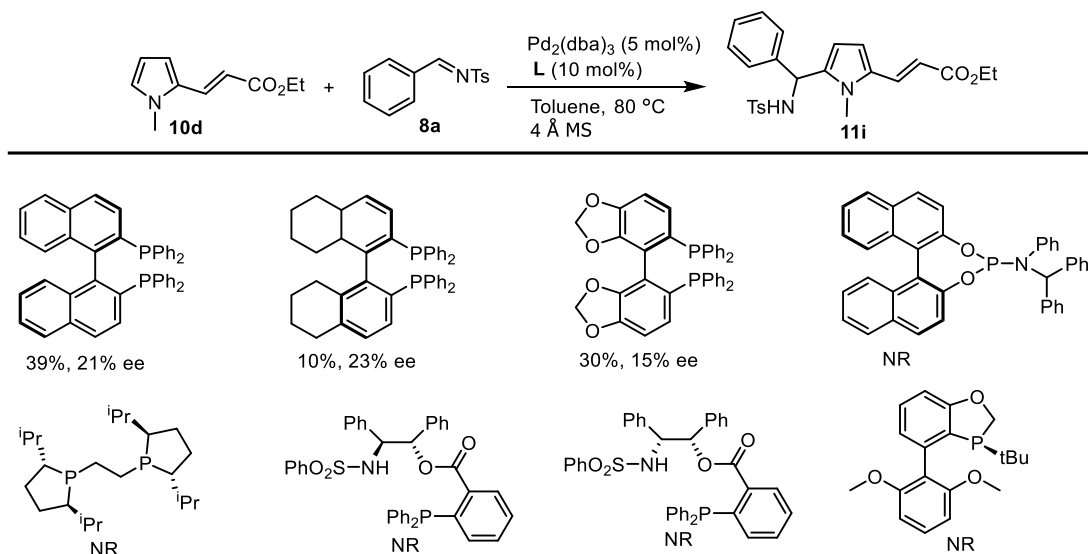

<sup>a</sup> Reactions were carried out with **10d** (0.05 mmol), **8a** (0.05 mmol), Pd<sub>2</sub>(dba)<sub>3</sub> (5 mol%), **L** (10 mol%) and 4 Å MS (20.0 mg) in toluene (0.5 mL) at 80 °C for 60 h under Ar.

It was found that substrate **10a** with a free NH group underwent the desired reaction smoothly in combination with ligands derived from *trans*-1,2-diphenylaminoethanol. It was assumed that the NH of **10a** might interact with the ligands via H-bonding, and the NH of the ligands might also activate imine via H-bonding interaction.

**Table S8. Ligand screenings for the asymmetric Friedel–Crafts reaction of 2-alkenyl pyrrole 10a with imine 8a<sup>a</sup>**

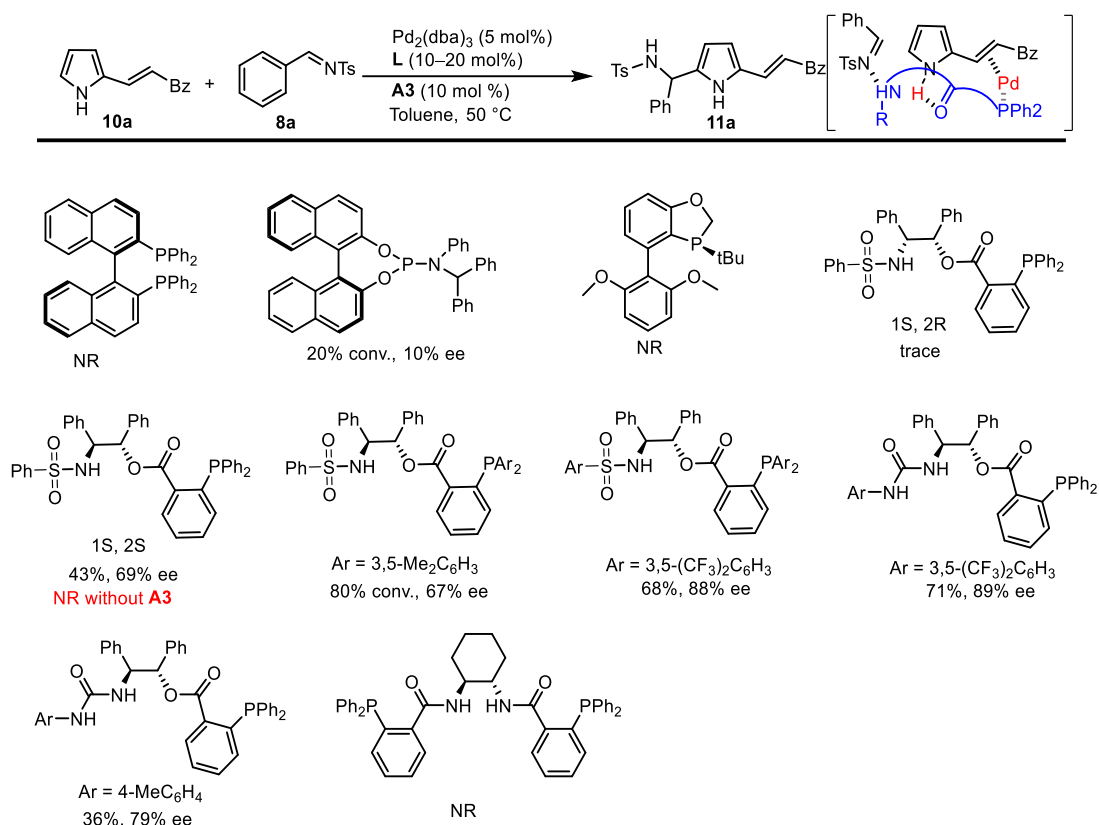

<sup>a</sup> Reactions were carried out with **10a** (0.03 mmol), **8a** (0.025 mmol), Pd<sub>2</sub>(dba)<sub>3</sub> (5 mol%), **L** (20 mol%), **A3** (10 mol%) and 4 Å MS (10.0 mg) in toluene (0.25 mL) at 50 °C for 48 h under Ar.

**Table S9. Other condition screenings for the asymmetric Friedel–Crafts reaction of 2-alkenyl pyrrole 10a with imine 8a<sup>a</sup>**

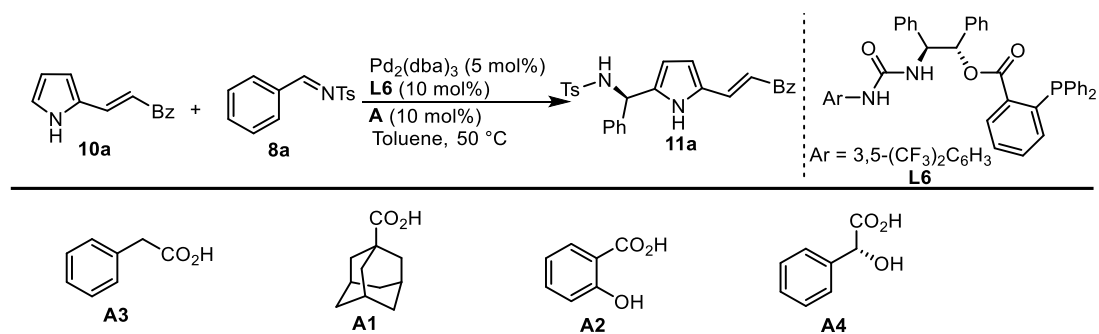

| Entry | A         | Pd/L6 | Solvent           | Yield (%) <sup>b</sup> | ee (%) <sup>c</sup> |
|-------|-----------|-------|-------------------|------------------------|---------------------|
| 1     | <b>A3</b> | 1/2   | Toluene           | 71                     | 89                  |
| 2     | <b>A1</b> | 1/2   | Toluene           | 89                     | 88                  |
| 3     | <b>A2</b> | 1/2   | Toluene           | 82                     | 91                  |
| 4     | <b>A4</b> | 1/2   | Toluene           | 80                     | 89                  |
| 5     | <b>A2</b> | 1/2   | Xylene            | 80                     | 81                  |
| 6     | <b>A2</b> | 1/2   | THF               | 69                     | 85                  |
| 7     | <b>A2</b> | 1/2   | CHCl <sub>3</sub> | 53                     | 78                  |

|                |           |     |         |    |    |
|----------------|-----------|-----|---------|----|----|
| 8              | <b>A2</b> | 1/1 | Toluene | 82 | 98 |
| 9 <sup>d</sup> | <b>A2</b> | 1/1 | Toluene | 74 | 97 |

<sup>a</sup> Unless noted otherwise, reactions were carried out with **10a** (0.03mmol), **8a** (0.025 mmol), Pd<sub>2</sub>(dba)<sub>3</sub> (5 mol%), **L6** (10 mol%), additive **A** (10 mol%) and 4 Å MS (10.0 mg) in solvent (0.25 mL) at 50 °C for 48 h under Ar. <sup>b</sup> Yield of the isolated product. <sup>c</sup> Determined by HPLC analysis on a chiral stationary phase. <sup>d</sup> Performed on a 0.1 mmol scale for 60 h.

## 7. Optimisations for the asymmetric Friedel–Crafts reaction of 2-alkenyl furan **12** with 1-azadiene **13**

**Table S10. Ligand screenings for the asymmetric Friedel–Crafts reaction of 2-alkenyl furan **12** with 1-azadiene **13**<sup>a</sup>**

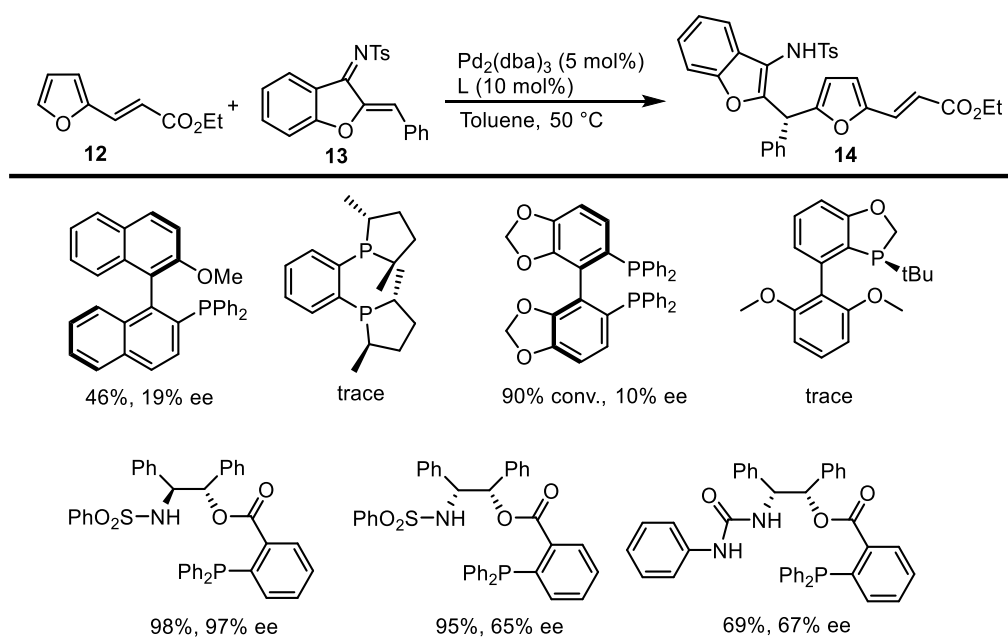

<sup>a</sup> Reactions were carried out with **12** (0.1 mmol), **13** (0.05 mmol), Pd<sub>2</sub>(dba)<sub>3</sub> (5 mol%), and **L** (10 mol%) in toluene (0.5 mL) at 50 °C for 36 h under Ar.

## 8. General procedure for the asymmetric [3 + 2] or [3 + 4] annulations of 2-indolyl propiolates **1** with enones **2**

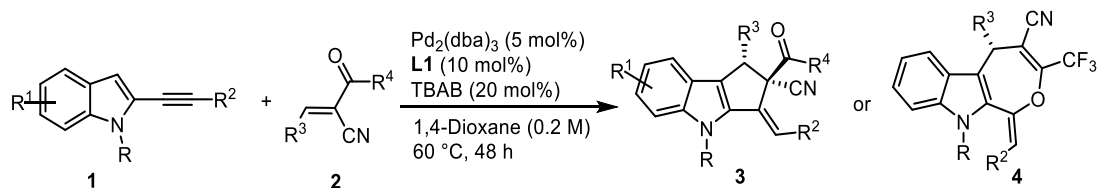

An oven-dried 10 mL Schlenk tube equipped with a magnetic stir bar was charged with 2-indolyl propiolate **1** (0.10 mmol, 1.0 equiv), enone **2** (0.13 mmol, 1.3 equiv) or enone **2h** (0.15 mmol, 1.5 equiv), TBAB (6.4 mg, 0.020 mmol, 20 mol%), Pd<sub>2</sub>(dba)<sub>3</sub> (4.6 mg, 0.0050 mmol, 5 mol%) and ligand **L1** (6.9 mg, 0.010 mmol, 10 mol%). The tube was then evacuated and back-filled three times with argon, and degassed 1,4-dioxane (0.5 mL) was added via syringe. The resulting solution was stirred at room temperature for 30 min, then heated to 60 °C or 80 °C for 48 h. After completion, the mixture was concentrated and purified by flash chromatography on silica gel (EtOAc/petroleum ether) to give product **3** or **4**. Racemic **3** or **4** was obtained under the catalysis of Pd(PPh<sub>3</sub>)<sub>4</sub> (10 mol%) in MeCN (0.5 mL).

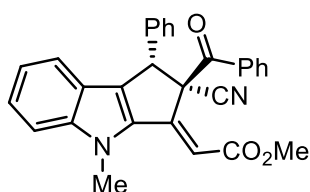

**Methyl (E)-2-((1S,2R)-2-benzoyl-2-cyano-4-methyl-1-phenyl-1,4-dihydrocyclopenta[b]indol-3(2H)-ylidene)acetate (**3a**):** An oven-dried

10 mL Schlenk tube equipped with a magnetic stir bar was charged with 2-indolyl propiolate **1a** (22.7 mg, 0.106 mmol, 1.0 equiv), enone **2a** (30.3 mg, 0.130 mmol, 1.3 equiv), Pd<sub>2</sub>(dba)<sub>3</sub> (4.6 mg, 0.0050 mmol, 5 mol%), ligand **L1** (6.9 mg, 0.010 mmol, 10 mol%) and TBAB (6.4 mg, 0.020 mmol, 20 mol%). The tube was then evacuated and filled with argon. This cycle was repeated three times, and degassed 1,4-dioxane (0.5 mL) was added via syringe. The resulting solution was stirred at room temperature for 30 min, then at 60 °C for 48 h. After completion, the mixture was concentrated and purified by flash chromatography on silica gel (petroleum ether/DCM/EtOAc = 30/10/1) to give product **3a**: 39.7 mg, as a yellow solid, 89% yield; >19:1 dr; >19:1 *E/Z*; mp 81–83 °C; [α]<sub>D</sub><sup>25</sup> = −26.4 (*c* = 0.25, in CHCl<sub>3</sub>); 84% ee, determined by HPLC analysis [Chiralpak column IB, *i*PrOH/*n*Hexane = 20/80, flow rate: 1.0 mL/min, 254 nm, *t* (major) = 13.39 min, *t* (minor) = 22.12 min]; <sup>1</sup>H NMR (400 MHz, CDCl<sub>3</sub>): δ (ppm) 7.95 (dd, *J* = 7.2 Hz, 1.3 Hz, 2H), 7.57 (dd, *J* = 7.0, 1.3 Hz, 1H), 7.45–7.33 (m, 7H), 7.22–7.17 (m, 2H), 7.08–6.98 (m, 2H), 6.43 (s, 1H), 5.00 (s, 1H), 4.01 (s, 3H), 3.62 (s, 3H); <sup>13</sup>C NMR (100 MHz, CDCl<sub>3</sub>): δ (ppm) 189.9, 165.8, 147.3, 145.6, 140.2, 136.4, 134.4, 133.3, 130.9, 129.7, 129.2, 128.8, 128.6, 128.4, 126.0,

122.2, 121.0, 120.8, 117.0, 110.3, 108.4, 68.5, 53.7, 51.6, 31.3; **HRMS** (ESI-TOF)  $m/z$ :  $[M + Na]^+$   
Calcd for  $C_{29}H_{22}N_2O_3Na^+$  469.1523; Found 469.1519.

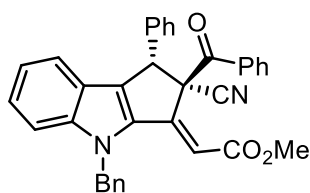

**Methyl (E)-2-((1S,2R)-2-benzoyl-4-benzyl-2-cyano-1-phenyl-1,4-dihydrocyclopenta[b]indol-3(2H)-ylidene)acetate (3b):** An oven-dried 10 mL Schlenk tube equipped with a magnetic stir bar was charged with 2-indolyl propiolate **1b** (28.9 mg, 0.0999 mmol, 1.0 equiv), enone **2a** (30.3

mg, 0.130 mmol, 1.3 equiv),  $Pd_2(dba)_3$  (4.6 mg, 0.0050 mmol, 5 mol%), ligand **L1** (6.9 mg, 0.010 mmol, 10 mol%) and TBAB (6.4 mg, 0.020 mmol, 20 mol%). The tube was then evacuated and filled with argon. This cycle was repeated three times, and degassed 1,4-dioxane (0.5 mL) was added via syringe. The resulting solution was stirred at room temperature for 30 min, then at 60 °C for 48 h. After completion, the mixture was concentrated and purified by flash chromatography on silica gel (petroleum ether/EtOAc = 10/1–8/1) to give product **3b**: 44.8 mg, as a yellow solid, 86% yield; >19:1 dr; >19:1 *E/Z*; mp 93–94 °C;  $[\alpha]_D^{25} = -10.2$  ( $c = 0.25$ , in  $CHCl_3$ ); 92% ee, determined by HPLC analysis [Chiralpak column IB, *i*PrOH/*n*Hexane = 20/80, flow rate: 1.0 mL/min, 254 nm,  $t$  (major) = 15.21 min,  $t$  (minor) = 24.49 min]; **<sup>1</sup>H NMR** (400 MHz,  $CDCl_3$ ):  $\delta$  (ppm) 7.91 (d,  $J = 7.4$  Hz, 2H), 7.55 (dd,  $J = 7.4, 1.2$  Hz, 1H), 7.42–7.35 (m, 8H), 7.35–7.30 (m, 2H), 7.26–7.22 (m, 2H), 7.17 (d,  $J = 6.8$  Hz, 2H), 7.12 (d,  $J = 7.8$  Hz, 1H), 7.05 (ddd,  $J = 7.9, 6.7, 1.2$  Hz, 1H), 6.16 (s, 1H), 5.59 (s, 2H), 5.06 (s, 1H), 3.54 (s, 3H); **<sup>13</sup>C NMR** (100 MHz,  $CDCl_3$ ):  $\delta$  (ppm) 189.7, 165.7, 146.6, 145.5, 140.1, 136.3, 136.2, 134.3, 133.3, 131.4, 129.6, 129.2, 129.0, 128.9, 128.7, 128.4, 128.0, 126.3, 125.9, 122.5, 121.3, 121.1, 116.8, 110.7, 109.0, 68.7, 53.5, 51.5, 47.9; **HRMS** (ESI-TOF)  $m/z$ :  $[M + Na]^+$   
Calcd for  $C_{33}H_{26}N_2O_3Na^+$  545.1836; Found 545.1841.

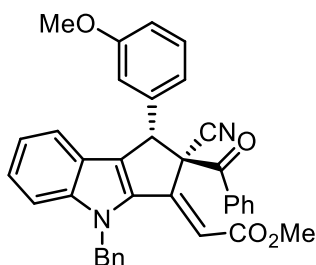

**Methyl (E)-2-((1S,2R)-2-benzoyl-4-benzyl-2-cyano-1-(3-methoxyphenyl)-1,4-dihydrocyclopenta[b]indol-3(2H)-ylidene)acetate (3c):**

An oven-dried 10 mL Schlenk tube equipped with a magnetic stir bar was charged with 2-indolyl propiolate **1b** (28.9 mg, 0.0999 mmol, 1.0 equiv), enone **2b** (34.2 mg, 0.130 mmol, 1.3 equiv),  $Pd_2(dba)_3$  (4.6 mg, 0.0050 mmol, 5 mol%), ligand **L1** (6.9 mg, 0.010 mmol, 10 mol%) and TBAB (6.4 mg, 0.020 mmol, 20 mol%). The tube was then evacuated and filled with argon. This cycle was repeated three times, and degassed 1,4-dioxane (0.5 mL) was added via syringe. The resulting solution was stirred at room

temperature for 30 min, then at 60 °C for 48 h. After completion, the mixture was concentrated and purified by flash chromatography on silica gel (petroleum ether/EtOAc = 10/1–6/1) to give product **3c**: 49.1 mg, as a yellow solid, 89% yield; >19:1 dr; >19:1 *E/Z*; mp 100–102 °C;  $[\alpha]_D^{25} = -6.4$  ( $c = 0.25$ , in  $\text{CHCl}_3$ ); 92% ee, determined by HPLC analysis [Chiralpak column IB, *i*PrOH/*n*Hexane = 20/80, flow rate: 1.0 mL/min, 254 nm,  $t$  (major) = 15.08 min,  $t$  (minor) = 26.63 min]; **<sup>1</sup>H NMR** (600 MHz,  $\text{CDCl}_3$ ):  $\delta$  (ppm) 7.94 (dd,  $J = 8.1, 1.5$  Hz, 2H), 7.60–7.52 (m, 1H), 7.43–7.35 (m, 5H), 7.34–7.25 (m, 3H), 7.20–7.13 (m, 3H), 7.06 (ddd,  $J = 8.0, 6.7, 1.3$  Hz, 1H), 6.94 (ddd,  $J = 8.3, 2.6, 1.0$  Hz, 1H), 6.87–6.79 (m, 1H), 6.78–6.73 (m, 1H), 6.15 (s, 1H), 5.59 (s, 2H), 5.02 (s, 1H), 3.72 (s, 3H), 3.55 (s, 3H); **<sup>13</sup>C NMR** (150 MHz,  $\text{CDCl}_3$ ):  $\delta$  (ppm) 189.8, 165.7, 159.6, 146.6, 145.5, 140.1, 137.9, 136.3, 134.4, 133.3, 131.4, 129.7, 129.2, 129.1, 128.4, 128.0, 126.3, 125.9, 122.5, 121.9, 121.3, 121.2, 116.9, 115.2, 114.5, 110.7, 109.0, 68.5, 55.2, 53.5, 51.6, 47.9; **HRMS** (ESI-TOF)  $m/z$ :  $[\text{M} + \text{Na}]^+$  Calcd for  $\text{C}_{36}\text{H}_{28}\text{N}_2\text{O}_4\text{Na}^+$  575.1942; Found 575.1940.

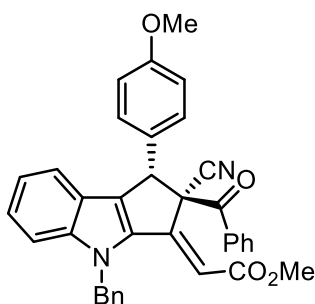

**Methyl (E)-2-((1S,2R)-2-benzoyl-4-benzyl-2-cyano-1-(4-methoxyphenyl)-1,4-dihydrocyclopenta[b]indol-3(2H)-ylidene)acetate (3d):**

An oven-dried 10 mL Schlenk tube equipped with a magnetic stir bar was charged with 2-indolyl propiolate **1b** (28.9 mg, 0.0999 mmol, 1.0 equiv), enone **2c** (39.4 mg, 0.149 mmol, 1.5 equiv),  $\text{Pd}_2(\text{dba})_3$  (4.6 mg, 0.0050 mmol, 5 mol%), ligand **L1** (6.9 mg, 0.010 mmol, 10 mol%) and TBAB (6.4 mg, 0.020 mmol, 20 mol%). The tube was then evacuated and filled with argon. This cycle was repeated three times, and degassed 1,4-dioxane (0.5 mL) was added via syringe. The resulting solution was stirred at room temperature for 30 min, then at 80 °C for 96 h. After completion, the mixture was concentrated and purified by flash chromatography on silica gel (petroleum ether/EtOAc = 10/1–6/1) to give product **3d**: 34.9 mg, as a yellow solid, 63% yield; >19:1 dr; >19:1 *E/Z*; mp 108–109 °C;  $[\alpha]_D^{25} = +34.6$  ( $c = 0.1$ , in  $\text{CHCl}_3$ ); 89% ee, determined by HPLC analysis [Chiralpak column IB, *i*PrOH/*n*Hexane = 20/80, flow rate: 1.0 mL/min, 254 nm,  $t$  (major) = 20.11 min,  $t$  (minor) = 37.53 min]; **<sup>1</sup>H NMR** (600 MHz,  $\text{CDCl}_3$ ):  $\delta$  (ppm) 7.91 (d,  $J = 7.2$  Hz, 2H), 7.58–7.52 (m, 1H), 7.38 (dd,  $J = 8.2, 6.8$  Hz, 7H), 7.19–7.12 (m, 5H), 7.06 (ddd,  $J = 8.0, 6.6, 1.2$  Hz, 1H), 6.91 (d,  $J = 8.7$  Hz, 2H), 6.14 (s, 1H), 5.59 (s, 2H), 5.02 (s, 1H), 3.83 (s, 3H), 3.55 (s, 3H); **<sup>13</sup>C NMR** (150 MHz,  $\text{CDCl}_3$ ):  $\delta$  (ppm) 189.8, 165.7, 159.9, 146.7, 145.5, 139.9, 136.3, 134.3, 133.3, 131.8, 130.8, 129.2, 129.1, 128.4, 128.2, 128.0, 126.3, 125.9, 122.5, 121.2, 121.1, 117.0, 114.1, 110.7, 109.0, 68.9, 55.2, 53.1, 51.5,



47.9; **HRMS** (ESI-TOF)  $m/z$ :  $[M + Na]^+$  Calcd for  $C_{36}H_{28}N_2O_4Na^+$  575.1942; Found 575.1950.

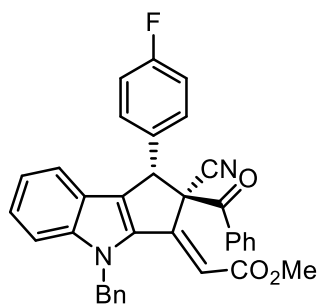

**Methyl (E)-2-((1S,2R)-2-benzoyl-4-benzyl-2-cyano-1-(4-fluorophenyl)-1,4-dihydrocyclopenta[b]indol-3(2H)-ylidene)acetate (3e):**

An oven-dried 10 mL Schlenk tube equipped with a magnetic stir bar was charged with 2-indolyl propiolate **1b** (28.9 mg, 0.0999 mmol, 1.0 equiv), enone **2d** (32.6 mg, 0.130 mmol, 1.3 equiv),  $Pd_2(dba)_3$  (4.6 mg, 0.0050 mmol, 5 mol%), ligand **L1** (6.9 mg, 0.010 mmol, 10 mol%) and TBAB (6.4 mg, 0.020 mmol, 20 mol%). The tube was then evacuated and filled with argon. This cycle was repeated three times, and degassed 1,4-dioxane (0.5 mL) was added via syringe. The resulting solution was stirred at room temperature for 30 min, then at 60 °C for 48 h. After completion, the mixture was concentrated and purified by flash chromatography on silica gel (petroleum ether/EtOAc = 10/1–6/1) to give product **3e**: 45.6 mg, as a yellow solid, 84% yield; >19:1 dr; >19:1 *E/Z*; mp 112–114 °C;  $[\alpha]_D^{25} = +36.6$  ( $c = 0.25$ , in  $CHCl_3$ ); 91% ee, determined by HPLC analysis [Chiralpak column IB, *i*PrOH/*n*Hexane = 20/80, flow rate: 1.0 mL/min, 254 nm,  $t$  (major) = 11.19 min,  $t$  (minor) = 16.97 min]; **<sup>1</sup>H NMR** (400 MHz,  $CDCl_3$ ):  $\delta$  (ppm) 7.88 (dd,  $J = 8.1, 1.5$  Hz, 2H), 7.58–7.52 (m, 1H), 7.43–7.27 (m, 7H), 7.24–7.19 (m, 2H), 7.19–7.15 (m, 2H), 7.14–7.04 (m, 4H), 6.15 (s, 1H), 5.59 (s, 2H), 5.06 (s, 1H), 3.55 (s, 3H).; **<sup>13</sup>C NMR** (100 MHz,  $CDCl_3$ ):  $\delta$  (ppm) 189.5, 165.7, 163.1 (d,  $J = 246.6$  Hz), 146.3, 145.5, 140.0, 136.2, 134.2, 133.4, 132.1, 131.3 (d,  $J = 8.6$  Hz), 130.9, 129.2, 128.9, 128.4, 128.1, 126.4, 125.9, 122.3, 121.4, 121.0, 116.8, 115.8 (d,  $J = 21.5$  Hz), 110.8, 109.3, 68.8, 52.7, 51.6, 47.9; **<sup>19</sup>F NMR** (376 MHz,  $CDCl_3$ ):  $\delta$  (ppm) –112.64; **HRMS** (ESI-TOF)  $m/z$ :  $[M + Na]^+$  Calcd for  $C_{35}H_{25}FN_2O_3Na^+$  563.1742; Found 563.1742.

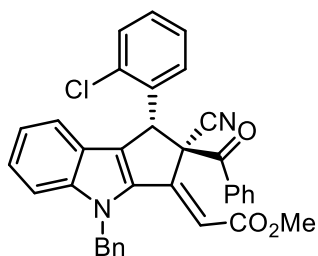

**Methyl (E)-2-((1S,2R)-2-benzoyl-4-benzyl-1-(2-chlorophenyl)-2-cyano-1,4-dihydrocyclopenta[b]indol-3(2H)-ylidene)acetate (3f):**

An oven-dried 10 mL Schlenk tube equipped with a magnetic stir bar was charged with 2-indolyl propiolate **1b** (28.9 mg, 0.0999 mmol, 1.0 equiv), enone **2e** (40.2 mg, 0.150 mmol, 1.5 equiv),  $Pd_2(dba)_3$  (4.6 mg, 0.0050 mmol, 5 mol%), ligand **L1** (6.9 mg, 0.010 mmol, 10 mol%) and TBAB (6.4 mg, 0.020 mmol, 20 mol%). The tube was then evacuated and filled with argon. This cycle was repeated three times, and degassed 1,4-dioxane (0.5 mL) was added via syringe. The resulting solution was stirred at room

temperature for 30 min, then at 80 °C for 96 h. After completion, the mixture was concentrated and purified by flash chromatography on silica gel (petroleum ether/EtOAc = 10/1–6/1) to give product **3f**: 33.2 mg, as a yellow solid, 60% yield; >19:1 dr; >19:1 *E/Z*; mp 102–104 °C;  $[\alpha]_D^{25} = -22.2$  ( $c = 0.25$ , in  $\text{CHCl}_3$ ); 65% ee, determined by HPLC analysis [Chiralpak column IA, *i*PrOH/*n*Hexane = 20/80, flow rate: 1.0 mL/min, 254 nm,  $t$  (major) = 13.47 min,  $t$  (minor) = 21.42 min];  **$^1\text{H NMR}$**  (400 MHz,  $\text{CDCl}_3$ ):  $\delta$  (ppm) 7.93–7.87 (m, 2H), 7.53 (d,  $J = 7.4$  Hz, 1H), 7.51–7.47 (m, 1H), 7.42–7.31 (m, 9H), 7.28 (dd,  $J = 7.8, 1.3$  Hz, 1H), 7.19–7.14 (m, 2H), 7.05 (dd,  $J = 3.1, 1.0$  Hz, 2H), 6.18 (s, 1H), 5.80 (s, 1H), 5.60 (s, 2H), 3.55 (s, 3H);  **$^{13}\text{C NMR}$**  (100 MHz,  $\text{CDCl}_3$ ):  $\delta$  (ppm) 189.3, 165.6, 146.5, 145.5, 140.0, 136.2, 134.6, 134.3, 134.2, 133.3, 131.9, 131.8, 130.0, 129.7, 129.3, 129.1, 128.3, 128.1, 127.2, 126.4, 125.9, 122.1, 121.4, 120.8, 117.0, 110.7, 109.4, 68.2, 51.6, 48.9, 47.9; **HRMS** (ESI-TOF)  $m/z$ :  $[\text{M} + \text{Na}]^+$  Calcd for  $\text{C}_{35}\text{H}_{25}\text{ClN}_2\text{O}_3\text{Na}^+$  579.1446 ( $^{35}\text{Cl}$ ), 580.1480 ( $^{37}\text{Cl}$ ); Found 579.1447 ( $^{35}\text{Cl}$ ), 580.1471 ( $^{37}\text{Cl}$ ).

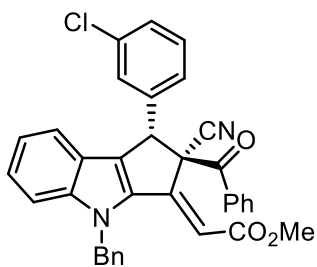

**Methyl (E)-2-((1S,2R)-2-benzoyl-4-benzyl-1-(3-chlorophenyl)-2-cyano-1,4-dihydrocyclopenta[b]indol-3(2H)-ylidene)acetate (3g):**

An oven-dried 10 mL Schlenk tube equipped with a magnetic stir bar was charged with 2-indolyl propiolate **1b** (28.9 mg, 0.0999 mmol, 1.0 equiv), enone **2f** (34.8 mg, 0.130 mmol, 1.3 equiv),  $\text{Pd}_2(\text{dba})_3$  (4.6 mg, 0.0050 mmol, 5 mol%), ligand **L1** (6.9 mg, 0.010 mmol, 10 mol%) and TBAB (6.4 mg, 0.020 mmol, 20 mol%). The tube was then evacuated and filled with argon. This cycle was repeated three times, and degassed 1,4-dioxane (0.5 mL) was added via syringe. The resulting solution was stirred at room temperature for 30 min, then at 60 °C for 48 h. After completion, the mixture was concentrated and purified by flash chromatography on silica gel (petroleum ether/EtOAc = 10/1–6/1) to give product **3g**: 46.3 mg, as a yellow solid, 83% yield; >19:1 dr; >19:1 *E/Z*; mp 106–108 °C;  $[\alpha]_D^{25} = +26.0$  ( $c = 0.1$ , in  $\text{CHCl}_3$ ); 95% ee, determined by HPLC analysis [Chiralpak column IB, *i*PrOH/*n*Hexane = 20/80, flow rate: 1.0 mL/min, 254 nm,  $t$  (major) = 11.40 min,  $t$  (minor) = 16.89 min];  **$^1\text{H NMR}$**  (400 MHz,  $\text{CDCl}_3$ ):  $\delta$  (ppm) 7.90 (dd,  $J = 8.4, 1.4$  Hz, 2H), 7.61–7.53 (m, 1H), 7.42–7.36 (m, 6H), 7.36–7.30 (m, 3H), 7.21–7.15 (m, 2H), 7.17–7.09 (m, 3H), 7.08 (ddd,  $J = 8.0, 6.4, 1.2$  Hz, 1H), 6.16 (s, 1H), 5.60 (s, 2H), 5.01 (s, 1H), 3.55 (s, 3H);  **$^{13}\text{C NMR}$**  (100 MHz,  $\text{CDCl}_3$ ):  $\delta$  (ppm) 189.4, 165.7, 146.1, 145.5, 140.2, 138.5, 136.1, 134.5, 134.1, 133.5, 130.4, 130.0, 129.7, 129.3, 129.2, 129.0, 128.5, 128.1, 127.8, 126.4, 125.9, 122.3, 121.5, 120.9, 116.7, 110.8, 109.3, 68.4, 52.9, 51.6, 47.9; **HRMS**

(ESI-TOF)  $m/z$ :  $[M + Na]^+$  Calcd for  $C_{35}H_{25}ClN_2O_3Na^+$  579.1446 ( $^{35}Cl$ ), 580.1480 ( $^{37}Cl$ ); Found 579.1449 ( $^{35}Cl$ ), 580.1475 ( $^{37}Cl$ ).

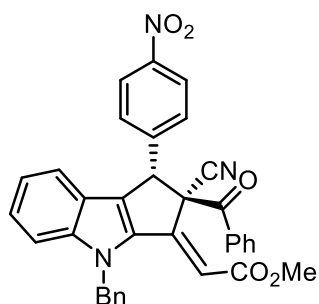

**Methyl (*E*)-2-((1*S*,2*R*)-2-benzoyl-4-benzyl-2-cyano-1-(4-nitrophenyl)-1,4-dihydrocyclopenta[*b*]indol-3(2*H*)-ylidene)acetate (**3h**):** An oven-dried 10 mL Schlenk tube equipped with a magnetic stir bar was charged with 2-indolyl propiolate **1b** (28.9 mg, 0.0999 mmol, 1.0 equiv), enone **2g** (36.2 mg, 0.130 mmol, 1.3 equiv),  $Pd_2(dba)_3$  (4.6 mg, 0.0050 mmol, 5 mol%), ligand **L1** (6.9 mg, 0.010 mmol, 10 mol%) and TBAB (6.4 mg,

0.020 mmol, 20 mol%). The tube was then evacuated and filled with argon. This cycle was repeated three times, and degassed 1,4-dioxane (0.5 mL) was added via syringe. The resulting solution was stirred at room temperature for 30 min, then at 60 °C for 48 h. After completion, the mixture was concentrated and purified by flash chromatography on silica gel (petroleum ether/EtOAc = 8/1–4/1) to give product **3h**: 40.2 mg, as a yellow solid, 71% yield; 10:1 dr; >19:1 *E/Z*; mp 136–138 °C;  $[\alpha]_D^{25} = +16.1$  ( $c = 0.1$ , in  $CHCl_3$ ); 89% ee, determined by HPLC analysis [Chiralpak column ID, *i*PrOH/*n*Hexane = 40/60, flow rate: 1.0 mL/min, 254 nm,  $t$  (major) = 21.73 min,  $t$  (minor) = 35.46 min];  **$^1H$  NMR** (400 MHz,  $CDCl_3$ ):  $\delta$  (ppm) 8.25 (d,  $J = 8.8$  Hz, 2H), 7.89–7.83 (m, 2H), 7.60–7.55 (m, 1H), 7.43–7.35 (m, 9H), 7.17 (d,  $J = 6.9$  Hz, 2H), 7.12–7.07 (m, 2H), 6.18 (s, 1H), 5.64 (d,  $J = 17.6$  Hz, 1H), 5.59 (d,  $J = 17.6$  Hz, 1H), 5.17 (s, 1H), 3.56 (s, 3H);  **$^{13}C$  NMR** (100 MHz,  $CDCl_3$ ):  $\delta$  (ppm) 189.1, 165.7, 148.2, 145.6, 145.5, 143.7, 140.3, 136.0, 133.9, 133.6, 130.5, 129.3, 129.2, 128.8, 128.5, 128.2, 126.7, 125.8, 124.0, 122.1, 121.8, 120.7, 116.4, 111.0, 109.8, 68.5, 52.6, 51.7, 48.0; **HRMS** (ESI-TOF)  $m/z$ :  $[M + Na]^+$  Calcd for  $C_{35}H_{25}N_3O_5Na^+$  590.1687; Found 590.1688.

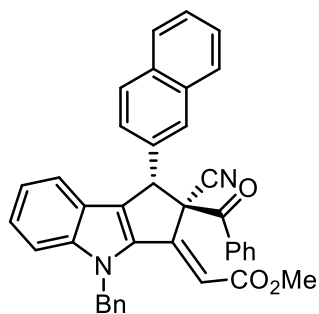

**Methyl (*E*)-2-((1*S*,2*R*)-2-benzoyl-4-benzyl-2-cyano-1-(naphthalen-2-yl)-1,4-dihydrocyclopenta[*b*]indol-3(2*H*)-ylidene)acetate (**3i**):** An oven-dried 10 mL Schlenk tube equipped with a magnetic stir bar was charged with 2-indolyl propiolate **1b** (28.9 mg, 0.0999 mmol, 1.0 equiv), enone **2h** (36.8 mg, 0.130 mmol, 1.3 equiv),  $Pd_2(dba)_3$  (4.6 mg, 0.0050 mmol, 5 mol%), ligand **L1** (6.9 mg, 0.010 mmol, 10 mol%) and TBAB

(6.4 mg, 0.020 mmol, 20 mol%). The tube was then evacuated and filled with argon. This cycle was repeated three times, and degassed 1,4-dioxane (0.5 mL) was added via syringe. The resulting

solution was stirred at room temperature for 30 min, then at 60 °C for 48 h. After completion, the mixture was concentrated and purified by flash chromatography on silica gel (petroleum ether/EtOAc = 8/1–4/1) to give product **3i**: 56.1 mg, as a white solid, 98% yield; >19:1 dr; >19:1 *E/Z*; mp 119–121 °C;  $[\alpha]_D^{25} = +62.0$  ( $c = 0.1$ , in  $\text{CHCl}_3$ ); 92% ee, determined by HPLC analysis [Chiralpak column IB, *i*PrOH/*n*Hexane = 20/80, flow rate: 1.0 mL/min, 254 nm,  $t$  (major) = 13.09 min,  $t$  (minor) = 22.11 min]; **<sup>1</sup>H NMR** (400 MHz,  $\text{CDCl}_3$ ):  $\delta$  (ppm) 7.96 (d,  $J = 7.0$  Hz, 2H), 7.85 (dd,  $J = 9.0, 3.6$  Hz, 2H), 7.79–7.73 (m, 2H), 7.59–7.54 (m, 1H), 7.52–7.47 (m, 2H), 7.43–7.35 (m, 5H), 7.37–7.27 (m, 3H), 7.20 (dd,  $J = 7.0, 1.8$  Hz, 2H), 7.07 (d,  $J = 7.9$  Hz, 1H), 6.99 (ddd,  $J = 8.0, 6.7, 1.0$  Hz, 1H), 6.20 (s, 1H), 5.61 (s, 2H), 5.22 (s, 1H), 3.55 (s, 3H); **<sup>13</sup>C NMR** (100 MHz,  $\text{CDCl}_3$ ):  $\delta$  (ppm) 189.7, 165.7, 146.6, 145.5, 140.1, 136.3, 134.3, 133.9, 133.5, 133.3, 133.2, 131.5, 129.24, 129.15, 128.6, 128.4, 128.1, 128.0, 127.8, 126.8, 126.5, 126.30, 126.28, 125.9, 122.5, 121.3, 121.1, 117.0, 110.7, 109.1, 68.4, 53.7, 51.6, 47.9; **HRMS** (ESI-TOF)  $m/z$ :  $[\text{M} + \text{Na}]^+$  Calcd for  $\text{C}_{39}\text{H}_{28}\text{N}_2\text{O}_3\text{Na}^+$  595.1993; Found 595.2001.

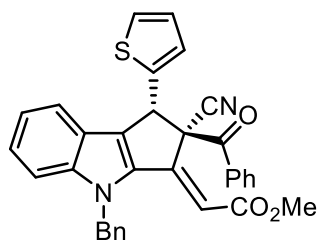

**Methyl (E)-2-((1S,2R)-2-benzoyl-4-benzyl-2-cyano-1-(thiophen-2-yl)-1,4-dihydrocyclopenta[b]indol-3(2H)-ylidene)acetate (3j):** An

oven-dried 10 mL Schlenk tube equipped with a magnetic stir bar was charged with 2-indolyl propiolate **1b** (28.9 mg, 0.0999 mmol, 1.0 equiv), enone **2i** (31.1 mg, 0.130 mmol, 1.3 equiv),  $\text{Pd}_2(\text{dba})_3$  (4.6 mg, 0.0050 mmol, 5 mol%), ligand **L1** (6.9 mg, 0.010 mmol, 10 mol%) and TBAB (6.4 mg, 0.020 mmol, 20 mol%). The tube was then evacuated and filled with argon. This cycle was repeated three times, and degassed 1,4-dioxane (0.5 mL) was added via syringe. The resulting solution was stirred at room temperature for 30 min, then at 60 °C for 48 h. After completion, the mixture was concentrated and purified by flash chromatography on silica gel (petroleum ether/EtOAc = 10/1–6/1) to give product **3j**: 46.7 mg, as a yellow solid, 88% yield; >19:1 dr; >19:1 *E/Z*; mp 87–89 °C;  $[\alpha]_D^{25} = -4.8$  ( $c = 0.25$ , in  $\text{CHCl}_3$ ); 91% ee, determined by HPLC analysis [Chiralpak column IB, *i*PrOH/*n*Hexane = 20/80, flow rate: 1.0 mL/min, 254 nm,  $t$  (major) = 15.46 min,  $t$  (minor) = 25.33 min]; **<sup>1</sup>H NMR** (400 MHz,  $\text{CDCl}_3$ ):  $\delta$  (ppm) 7.95–7.89 (m, 2H), 7.58–7.51 (m, 1H), 7.42–7.35 (m, 8H), 7.34–7.31 (m, 1H), 7.25 (d,  $J = 1.8$  Hz, 1H), 7.19–7.15 (m, 2H), 7.12 (dd,  $J = 8.0, 1.0$  Hz, 1H), 7.05 (ddd,  $J = 7.9, 6.6, 1.2$  Hz, 1H), 6.16 (s, 1H), 5.59 (s, 2H), 5.06 (s, 1H), 3.54 (s, 3H); **<sup>13</sup>C NMR** (100 MHz,  $\text{CDCl}_3$ ):  $\delta$  (ppm) 189.7, 165.7, 146.6, 145.5, 140.1, 136.33, 136.25, 134.2, 133.3, 131.4, 129.6, 129.2, 129.0, 128.9,

128.7, 128.4, 128.0, 126.3, 125.9, 122.5, 121.3, 121.1, 116.8, 110.7, 109.0, 68.7, 53.5, 51.5, 47.9; **HRMS** (ESI-TOF) *m/z*: [M + H]<sup>+</sup> Calcd for C<sub>33</sub>H<sub>25</sub>N<sub>2</sub>O<sub>3</sub>S<sup>+</sup> 529.1581; Found 529.1590.

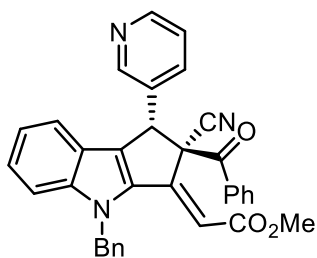

**Methyl (E)-2-((1R,2R)-2-benzoyl-4-benzyl-2-cyano-1-(pyridin-3-yl)-1,4-dihydrocyclopenta[b]indol-3(2H)-ylidene)acetate (3k):** An oven-dried 10 mL Schlenk tube equipped with a magnetic stir bar was charged with 2-indolyl propiolate **1b** (28.9 mg, 0.0999 mmol, 1.0 equiv), enone **2j** (30.4 mg, 0.130 mmol, 1.3 equiv), Pd<sub>2</sub>(dba)<sub>3</sub> (4.6 mg, 0.0050 mmol, 5 mol%), ligand **L1** (6.9 mg, 0.010 mmol, 10 mol%) and TBAB (6.4 mg, 0.020 mmol, 20 mol%). The tube was then evacuated and filled with argon. This cycle was repeated three times, and degassed 1,4-dioxane (0.5 mL) was added via syringe. The resulting solution was stirred at room temperature for 30 min, then at 60 °C for 72 h. After completion, the mixture was concentrated and purified by flash chromatography on silica gel (petroleum ether/EtOAc = 10/1–6/1–3/1) to give product **3k**: 34.2 mg, as a yellow solid, 65% yield; >19:1 dr; >19:1 *E/Z*; mp 105–107 °C; [α]<sup>25</sup><sub>D</sub> = +2.4 (*c* = 0.25, in CHCl<sub>3</sub>); 91% ee, determined by HPLC analysis [Chiralpak column IB, *i*PrOH/*n*Hexane = 20/80, flow rate: 1.0 mL/min, 254 nm, *t* (major) = 24.50 min, *t* (minor) = 37.80 min]; <sup>1</sup>H NMR (400 MHz, CDCl<sub>3</sub>): δ (ppm) 8.67 (dd, *J* = 4.8, 1.6 Hz, 1H), 8.50 (d, *J* = 2.3 Hz, 1H), 7.90 (dd, *J* = 7.2, 1.3 Hz, 2H), 7.60–7.52 (m, 2H), 7.44–7.30 (m, 8H), 7.20–7.14 (m, 2H), 7.10–7.06 (m, 2H), 6.18 (s, 1H), 5.61 (s, 2H), 5.07 (s, 1H), 3.56 (s, 3H); <sup>13</sup>C NMR (100 MHz, CDCl<sub>3</sub>): δ (ppm) 189.2, 165.7, 150.5, 150.3, 146.0, 145.5, 140.2, 137.0, 136.1, 134.1, 133.5, 132.5, 129.9, 129.3, 128.9, 128.5, 128.1, 126.5, 125.8, 123.7, 122.1, 121.6, 120.7, 116.8, 110.9, 109.5, 68.4, 51.7, 50.8, 47.9; **HRMS** (ESI-TOF) *m/z*: [M + Na]<sup>+</sup> Calcd for C<sub>34</sub>H<sub>25</sub>N<sub>3</sub>O<sub>3</sub>Na<sup>+</sup> 546.1789; Found 546.1780.

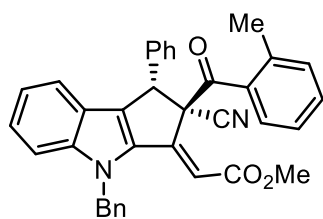

**Methyl (E)-2-((1S,2R)-4-benzyl-2-cyano-2-(2-methylbenzoyl)-1-phenyl-1,4-dihydrocyclopenta[b]indol-3(2H)-ylidene)acetate (3l):**

An oven-dried 10 mL Schlenk tube equipped with a magnetic stir bar was charged with 2-indolyl propiolate **1b** (28.9 mg, 0.0999 mmol, 1.0 equiv), enone **2k** (32.1 mg, 0.130 mmol, 1.3 equiv), Pd<sub>2</sub>(dba)<sub>3</sub> (4.6 mg, 0.0050 mmol, 5 mol%), ligand **L1** (6.9 mg, 0.010 mmol, 10 mol%) and TBAB (6.4 mg, 0.020 mmol, 20 mol%). The tube was then evacuated and filled with argon. This cycle was repeated three times, and degassed 1,4-dioxane (0.5 mL) was added via syringe. The resulting solution was stirred at room temperature for 30 min, then

at 60 °C for 48 h. After completion, the mixture was concentrated and purified by flash chromatography on silica gel (petroleum ether/EtOAc = 10/1–6/1) to give product **3l**: 43.8 mg, as a yellow solid, 82% yield; >19:1 dr; >19:1 *E/Z*; mp 107–109 °C;  $[\alpha]_D^{25} = +12.6$  ( $c = 0.25$ , in CHCl<sub>3</sub>); 90% ee, determined by HPLC analysis [Chiralpak column IB, *i*PrOH/*n*Hexane = 20/80, flow rate: 1.0 mL/min, 254 nm,  $t$  (major) = 11.42 min,  $t$  (minor) = 14.81 min]; **<sup>1</sup>H NMR** (400 MHz, CDCl<sub>3</sub>):  $\delta$  (ppm) 7.69–7.63 (m, 1H), 7.42–7.28 (m, 10H), 7.26 (d,  $J = 2.1$  Hz, 2H), 7.19–7.15 (m, 2H), 7.13 (d,  $J = 8.0$  Hz, 1H), 7.10–7.02 (m, 2H), 6.13 (s, 1H), 5.57 (s, 2H), 5.11 (s, 1H), 3.57 (s, 3H), 2.56 (s, 3H); **<sup>13</sup>C NMR** (100 MHz, CDCl<sub>3</sub>):  $\delta$  (ppm) 191.6, 166.0, 147.1, 145.5, 140.6, 140.3, 136.8, 136.2, 133.5, 132.4, 131.9, 131.8, 129.7, 129.2, 128.8, 128.7, 128.2, 128.0, 126.2, 125.9, 124.6, 122.5, 121.2, 121.1, 116.9, 110.7, 108.5, 69.3, 53.9, 51.7, 47.9, 21.1; **HRMS** (ESI-TOF)  $m/z$ :  $[M + Na]^+$  Calcd for C<sub>36</sub>H<sub>28</sub>N<sub>2</sub>O<sub>3</sub>Na<sup>+</sup> 559.1993; Found 559.1992.

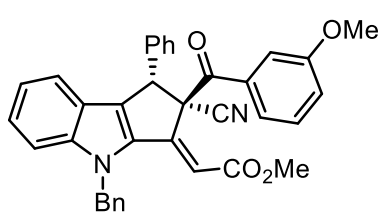

**Methyl (*E*)-2-((1*S*,2*R*)-4-benzyl-2-cyano-2-(3-methoxybenzoyl)-1-phenyl-1,4-dihydrocyclopenta[*b*]indol-3(2*H*)-ylidene)acetate**

**(3m)**: An oven-dried 10 mL Schlenk tube equipped with a magnetic stir bar was charged with 2-indolyl propiolate **1b** (28.9 mg, 0.0999

mmol, 1.0 equiv), enone **2l** (34.2 mg, 0.130 mmol, 1.3 equiv), Pd<sub>2</sub>(dba)<sub>3</sub> (4.6 mg, 0.0050 mmol, 5 mol%), ligand **L1** (6.9 mg, 0.010 mmol, 10 mol%) and TBAB (6.4 mg, 0.020 mmol, 20 mol%). The tube was then evacuated and filled with argon. This cycle was repeated three times, and degassed 1,4-dioxane (0.5 mL) was added via syringe. The resulting solution was stirred at room temperature for 30 min, then at 60 °C for 48 h. After completion, the mixture was concentrated and purified by flash chromatography on silica gel (petroleum ether/EtOAc = 10/1–6/1) to give product **3m**: 47.5 mg, as a yellow solid, 86% yield; >19:1 dr; >19:1 *E/Z*; mp 93–95 °C;  $[\alpha]_D^{25} = +8.0$  ( $c = 0.25$ , in CHCl<sub>3</sub>); 91% ee, determined by HPLC analysis [Chiralpak column IA, *i*PrOH/*n*Hexane = 20/80, flow rate: 1.0 mL/min, 254 nm,  $t$  (major) = 13.85 min,  $t$  (minor) = 16.79 min]; **<sup>1</sup>H NMR** (400 MHz, CDCl<sub>3</sub>):  $\delta$  (ppm) 7.45–7.37 (m, 2H), 7.35–7.27 (m, 6H), 7.25 (dt,  $J = 7.1, 1.9$  Hz, 2H), 7.20–7.16 (m, 3H), 7.13–7.08 (m, 2H), 7.03 (dd,  $J = 8.3, 2.0$  Hz, 2H), 6.96 (ddd,  $J = 8.0, 6.6, 1.2$  Hz, 1H), 6.09 (s, 1H), 5.51 (s, 2H), 4.97 (s, 1H), 3.65 (s, 3H), 3.48 (s, 3H); **<sup>13</sup>C NMR** (100 MHz, CDCl<sub>3</sub>):  $\delta$  (ppm) 189.4, 165.8, 159.5, 146.7, 145.5, 140.0, 136.4, 136.2, 135.4, 131.5, 129.7, 129.3, 129.2, 128.9, 128.7, 128.0, 126.3, 125.9, 122.4, 121.4, 121.3, 121.1, 120.3, 116.9, 113.5, 110.7, 108.9, 68.6, 55.3, 53.6, 51.6, 47.9; **HRMS** (ESI-TOF)  $m/z$ :  $[M + Na]^+$  Calcd for C<sub>36</sub>H<sub>28</sub>N<sub>2</sub>O<sub>4</sub>Na<sup>+</sup> 575.1942; Found 575.1941.

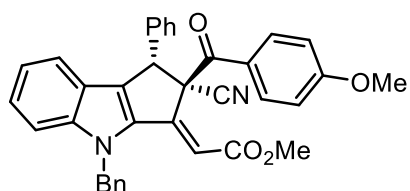

**Methyl (E)-2-((1S,2R)-4-benzyl-2-cyano-2-(4-methoxybenzoyl)-1-phenyl-1,4-dihydrocyclopenta[b]indol-3(2H)-ylidene)acetate (3n):**

An oven-dried 10 mL Schlenk tube equipped with a magnetic stir bar was charged with 2-indolyl propiolate **1b** (28.9 mg, 0.0999 mmol, 1.0 equiv), enone **2m** (34.2 mg, 0.130 mmol, 1.3 equiv), Pd<sub>2</sub>(dba)<sub>3</sub> (4.6 mg, 0.0050 mmol, 5 mol%), ligand **L1** (6.9 mg, 0.010 mmol, 10 mol%) and TBAB (6.4 mg, 0.020 mmol, 20 mol%). The tube was then evacuated and filled with argon. This cycle was repeated three times, and degassed 1,4-dioxane (0.5 mL) was added via syringe. The resulting solution was stirred at room temperature for 30 min, then at 60 °C for 48 h. After completion, the mixture was concentrated and purified by flash chromatography on silica gel (petroleum ether/EtOAc = 10/1–6/1) to give product **3n**: 48.8 mg, as a yellow solid, 88% yield; >19:1 dr; >19:1 *E/Z*; mp 162–163 °C; [α]<sub>D</sub><sup>25</sup> = +6.7 (*c* = 0.25, in CHCl<sub>3</sub>); 90% ee, determined by HPLC analysis [Chiralpak column IA, *i*PrOH/*n*Hexane = 20/80, flow rate: 1.0 mL/min, 254 nm, *t* (major) = 27.80 min, *t* (minor) = 30.85 min]; <sup>1</sup>H NMR (400 MHz, CDCl<sub>3</sub>): δ (ppm) δ 7.93 (d, *J* = 8.9 Hz, 2H), 7.42–7.35 (m, 6H), 7.35–7.29 (m, 2H), 7.25–7.23 (m, 2H), 7.21–7.16 (m, 2H), 7.11 (d, *J* = 7.9 Hz, 1H), 7.04 (ddd, *J* = 7.9, 6.7, 1.1 Hz, 1H), 6.85 (d, *J* = 9.0 Hz, 2H), 6.17 (s, 1H), 5.59 (s, 2H), 5.02 (s, 1H), 3.85 (s, 3H), 3.55 (s, 3H); <sup>13</sup>C NMR (100 MHz, CDCl<sub>3</sub>): δ (ppm) 188.2, 165.6, 163.6, 146.7, 145.5, 140.1, 136.5, 136.3, 131.6, 131.5, 129.7, 129.2, 128.8, 128.7, 128.0, 126.8, 126.2, 125.9, 122.5, 121.2, 121.1, 117.2, 113.7, 110.7, 109.1, 68.4, 55.5, 53.6, 51.5, 47.9; HRMS (ESI-TOF) *m/z*: [M + Na]<sup>+</sup> Calcd for C<sub>36</sub>H<sub>28</sub>N<sub>2</sub>O<sub>4</sub>Na<sup>+</sup> 575.1942; Found 575.1944.

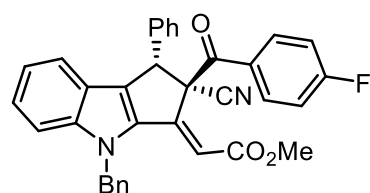

**Methyl (E)-2-((1S,2R)-4-benzyl-2-cyano-2-(4-fluorobenzoyl)-1-phenyl-1,4-dihydrocyclopenta[b]indol-3(2H)-ylidene)acetate (3o):**

An oven-dried 10 mL Schlenk tube equipped with a magnetic stir bar was charged with 2-indolyl propiolate **1b** (28.9 mg, 0.0999 mmol, 1.0 equiv), enone **2n** (32.6 mg, 0.130 mmol, 1.3 equiv), Pd<sub>2</sub>(dba)<sub>3</sub> (4.6 mg, 0.0050 mmol, 5 mol%), ligand **L1** (6.9 mg, 0.010 mmol, 10 mol%) and TBAB (6.4 mg, 0.020 mmol, 20 mol%). The tube was then evacuated and filled with argon. This cycle was repeated three times, and degassed 1,4-dioxane (0.5 mL) was added via syringe. The resulting solution was stirred at room temperature for 30 min, then at 60 °C for 48 h. After completion, the mixture was concentrated and purified by flash chromatography on silica gel (petroleum ether/EtOAc = 10/1–6/1) to give product **3o**: 50.3 mg, as a

yellow solid, 93% yield; >19:1 dr; >19:1 *E/Z*; mp 107–109 °C;  $[\alpha]_D^{25} = -26.0$  ( $c = 0.1$ , in  $\text{CHCl}_3$ ); 88% ee, determined by HPLC analysis [Chiralpak column IB, *i*PrOH/*n*Hexane = 20/80, flow rate: 1.0 mL/min, 254 nm,  $t$  (major) = 12.54 min,  $t$  (minor) = 23.05 min]; **<sup>1</sup>H NMR** (400 MHz,  $\text{CDCl}_3$ ):  $\delta$  (ppm) 7.99–7.93 (m, 2H), 7.43–7.36 (m, 6H), 7.36–7.30 (m, 2H), 7.23 (dd,  $J = 7.5, 2.1$  Hz, 2H), 7.19–7.15 (m, 2H), 7.11 (d,  $J = 7.9$  Hz, 1H), 7.08–7.02 (m, 3H), 6.17 (s, 1H), 5.59 (s, 2H), 5.00 (s, 1H), 3.56 (s, 3H); **<sup>13</sup>C NMR** (100 MHz,  $\text{CDCl}_3$ ):  $\delta$  (ppm) 188.3, 165.8, 165.7 (d,  $J = 254.5$  Hz), 146.6, 145.6, 140.0, 136.2, 131.9 (d,  $J = 9.2$  Hz), 131.5, 130.7 (d,  $J = 3.0$  Hz), 129.6, 129.3, 129.0, 128.7, 128.1, 126.4, 125.9, 122.4, 121.3, 121.1, 116.8, 115.7, 115.5, 110.7, 108.9, 68.3, 53.6, 51.6, 47.9; **<sup>19</sup>F NMR** (376 MHz,  $\text{CDCl}_3$ ):  $\delta$  (ppm) –104.17; **HRMS** (ESI-TOF)  $m/z$ :  $[\text{M} + \text{Na}]^+$  Calcd for  $\text{C}_{35}\text{H}_{25}\text{FN}_2\text{O}_3\text{Na}^+$  563.1742; Found 563.1752.

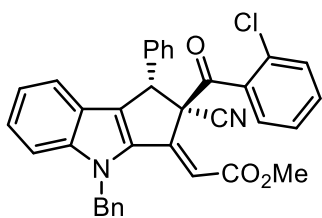

**Methyl (E)-2-((1*S*,2*R*)-4-benzyl-2-(2-chlorobenzoyl)-2-cyano-1-phenyl-1,4-dihydrocyclopenta[*b*]indol-3(2*H*)-ylidene)acetate (3p):** An

oven-dried 10 mL Schlenk tube equipped with a magnetic stir bar was charged with 2-indolyl propiolate **1b** (28.9 mg, 0.0999 mmol, 1.0 equiv), enone **2o** (34.8 mg, 0.130 mmol, 1.3 equiv),  $\text{Pd}_2(\text{dba})_3$  (4.6 mg, 0.0050 mmol, 5 mol%), ligand **L1** (6.9 mg, 0.010 mmol, 10 mol%) and TBAB (6.4 mg, 0.020 mmol, 20 mol%). The tube was then evacuated and filled with argon. This cycle was repeated three times, and degassed 1,4-dioxane (0.5 mL) was added via syringe. The resulting solution was stirred at room temperature for 30 min, then at 60 °C for 48 h. After completion, the mixture was concentrated and purified by flash chromatography on silica gel (petroleum ether/EtOAc = 10/1–6/1) to give product **3p**: 49.7 mg, as a yellow solid, 89% yield; >19:1 dr; >19:1 *E/Z*; mp 99–101 °C;  $[\alpha]_D^{25} = +140.8$  ( $c = 0.25$ , in  $\text{CHCl}_3$ ); 90% ee, determined by HPLC analysis [Chiralpak column IB, *i*PrOH/*n*Hexane = 20/80, flow rate: 1.0 mL/min, 254 nm,  $t$  (major) = 9.82 min,  $t$  (minor) = 15.11 min]; **<sup>1</sup>H NMR** (400 MHz,  $\text{CDCl}_3$ ):  $\delta$  (ppm) 8.33 (dd,  $J = 7.9, 1.6$  Hz, 1H), 7.58 (dd,  $J = 8.1, 1.2$  Hz, 1H), 7.45 (td,  $J = 7.7, 1.6$  Hz, 1H), 7.38 (dd,  $J = 8.2, 6.5$  Hz, 2H), 7.35–7.25 (m, 7H), 7.22–7.16 (m, 2H), 7.12 (dt,  $J = 8.0, 1.1$  Hz, 1H), 7.07–7.01 (m, 3H), 6.23 (s, 1H), 5.57 (s, 2H), 5.27 (s, 1H), 3.68 (s, 3H); **<sup>13</sup>C NMR** (100 MHz,  $\text{CDCl}_3$ ):  $\delta$  (ppm) 188.7, 166.2, 145.9, 145.5, 140.3, 137.0, 136.2, 135.3, 132.3, 131.3, 131.0, 130.8, 129.2, 129.1, 128.7, 128.6, 128.0, 126.6, 126.32, 126.25, 125.9, 122.5, 121.2, 121.1, 116.4, 110.7, 108.4, 69.5, 52.0, 51.8, 47.9; **HRMS** (ESI-TOF)  $m/z$ :  $[\text{M} + \text{Na}]^+$  Calcd for  $\text{C}_{35}\text{H}_{25}\text{ClN}_2\text{O}_3\text{Na}^+$  579.1446 ( $^{35}\text{Cl}$ ), 580.1480 ( $^{37}\text{Cl}$ ); Found 579.1447 ( $^{35}\text{Cl}$ ), 580.1478 ( $^{37}\text{Cl}$ ).



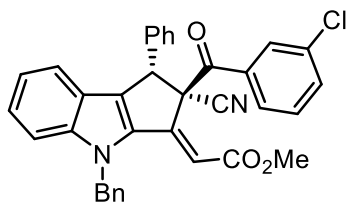

**Methyl (E)-2-((1S,2R)-4-benzyl-2-(3-chlorobenzoyl)-2-cyano-1-phenyl-1,4-dihydrocyclopenta[b]indol-3(2H)-ylidene)acetate (3q):**

An oven-dried 10 mL Schlenk tube equipped with a magnetic stir bar was charged with 2-indolyl propiolate **1b** (28.9 mg, 0.0999 mmol, 1.0 equiv), enone **2p** (34.8 mg, 0.130 mmol, 1.3 equiv), Pd<sub>2</sub>(dba)<sub>3</sub> (4.6 mg, 0.0050 mmol, 5 mol%), ligand **L1** (6.9 mg, 0.010 mmol, 10 mol%) and TBAB (6.4 mg, 0.020 mmol, 20 mol%). The tube was then evacuated and filled with argon. This cycle was repeated three times, and degassed 1,4-dioxane (0.5 mL) was added via syringe. The resulting solution was stirred at room temperature for 30 min, then at 60 °C for 36 h. After completion, the mixture was concentrated and purified by flash chromatography on silica gel (petroleum ether/EtOAc = 10/1–6/1) to give product **3q**: 46.3 mg, as a yellow solid, 83% yield; >19:1 dr; >19:1 *E/Z*; mp 98–99 °C; [α]<sub>D</sub><sup>25</sup> = –6.4 (*c* = 0.25, in CHCl<sub>3</sub>); 90% ee, determined by HPLC analysis [Chiralpak column IB, *i*PrOH/*n*Hexane = 20/80, flow rate: 1.0 mL/min, 254 nm, *t* (major) = 13.81 min, *t* (minor) = 32.35 min]; <sup>1</sup>H NMR (400 MHz, CDCl<sub>3</sub>): δ (ppm) 7.91 (d, *J* = 1.9 Hz, 1H), 7.77 (dd, *J* = 7.9, 1.8 Hz, 1H), 7.55–7.50 (m, 1H), 7.43–7.27 (m, 10H), 7.22 (s, 1H), 7.20–7.15 (m, 2H), 7.11 (d, *J* = 7.9 Hz, 1H), 7.05 (ddd, *J* = 8.0, 6.4, 1.3 Hz, 1H), 6.15 (s, 1H), 5.59 (s, 2H), 5.02 (s, 1H), 3.57 (s, 3H); <sup>13</sup>C NMR (100 MHz, CDCl<sub>3</sub>): δ (ppm) 188.5, 165.9, 146.4, 145.6, 139.9, 136.2, 136.1, 135.9, 134.7, 133.2, 131.4, 129.63, 129.58, 129.3, 129.2, 129.0, 128.8, 128.0, 126.9, 126.4, 125.8, 122.4, 121.3, 121.1, 116.6, 110.7, 108.8, 68.5, 53.6, 51.7, 47.9; HRMS (ESI-TOF) *m/z*: [M + Na]<sup>+</sup> Calcd for C<sub>35</sub>H<sub>25</sub>ClN<sub>2</sub>O<sub>3</sub>Na<sup>+</sup> 579.1446 (<sup>35</sup>Cl), 580.1480 (<sup>37</sup>Cl); Found 579.1452 (<sup>35</sup>Cl), 580.1483 (<sup>37</sup>Cl).

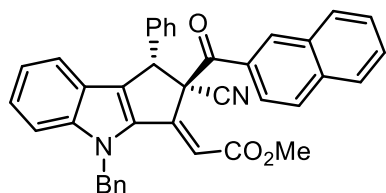

**Methyl (E)-2-((1S,2R)-2-(2-naphthoyl)-4-benzyl-2-cyano-1-phenyl-1,4-dihydrocyclopenta[b]indol-3(2H)-ylidene)acetate (3r):**

An oven-dried 10 mL Schlenk tube equipped with a magnetic stir bar was charged with 2-indolyl propiolate **1b** (28.9 mg, 0.0999 mmol, 1.0 equiv), enone **2q** (36.8 mg, 0.130 mmol, 1.3 equiv), Pd<sub>2</sub>(dba)<sub>3</sub> (4.6 mg, 0.0050 mmol, 5 mol%), ligand **L1** (6.9 mg, 0.010 mmol, 10 mol%) and TBAB (6.4 mg, 0.020 mmol, 20 mol%). The tube was then evacuated and filled with argon. This cycle was repeated three times, and degassed 1,4-dioxane (0.5 mL) was added via syringe. The resulting solution was stirred at room temperature for 30 min, then at 60 °C for 48 h. After completion, the mixture was concentrated and purified by flash

chromatography on silica gel (petroleum ether/EtOAc = 10/1–6/1) to give product **3r**: 53.8 mg, as a yellow solid, 94% yield; >19:1 dr; >19:1 *E/Z*; mp 85–87 °C;  $[\alpha]_D^{25} = +64.0$  ( $c = 0.1$ , in CHCl<sub>3</sub>); 86% ee, determined by HPLC analysis [Chiralpak column IB, *i*PrOH/*n*Hexane = 20/80, flow rate: 1.0 mL/min, 254 nm, *t* (major) = 11.81 min, *t* (minor) = 14.74 min]; **<sup>1</sup>H NMR** (400 MHz, CDCl<sub>3</sub>): δ (ppm) 8.48 (dd, *J* = 8.6, 1.3 Hz, 1H), 8.00 (d, *J* = 7.8 Hz, 2H), 7.88 (dd, *J* = 8.5, 1.3 Hz, 1H), 7.60 (ddd, *J* = 8.5, 6.8, 1.6 Hz, 1H), 7.54 (ddd, *J* = 8.1, 6.8, 1.3 Hz, 1H), 7.42–7.29 (m, 9H), 7.22–7.17 (m, 2H), 7.16–7.10 (m, 3H), 7.06 (ddd, *J* = 7.9, 6.5, 1.3 Hz, 1H), 6.17 (s, 1H), 5.60 (s, 2H), 5.22 (s, 1H), 3.44 (s, 3H); **<sup>13</sup>C NMR** (100 MHz, CDCl<sub>3</sub>): δ (ppm) 191.6, 166.0, 147.0, 145.5, 140.3, 136.8, 136.3, 134.2, 133.2, 131.70, 131.66, 130.8, 129.6, 129.3, 128.8, 128.6, 128.5, 128.0, 127.9, 127.6, 126.5, 126.3, 126.2, 125.9, 123.4, 122.5, 121.3, 121.2, 116.9, 110.7, 108.6, 69.8, 54.0, 51.7, 47.9; **HRMS** (ESI-TOF) *m/z*: [M + Na]<sup>+</sup> Calcd for C<sub>39</sub>H<sub>28</sub>N<sub>2</sub>O<sub>3</sub>Na<sup>+</sup> 595.1993; Found 595.1998.

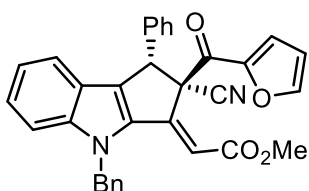

**Methyl (E)-2-((1*S*,2*R*)-4-benzyl-2-cyano-2-(furan-2-carbonyl)-1-phenyl-1,4-dihydrocyclopenta[*b*]indol-3(2*H*)-ylidene)acetate (**3s**):** An

oven-dried 10 mL Schlenk tube equipped with a magnetic stir bar was charged with 2-indolyl propiolate **1b** (28.9 mg, 0.0999 mmol, 1.0 equiv), enone **2r** (29.0 mg, 0.130 mmol, 1.3 equiv), Pd<sub>2</sub>(dba)<sub>3</sub> (4.6 mg, 0.0050 mmol, 5 mol%), ligand **L1** (6.9 mg, 0.010 mmol, 10 mol%) and TBAB (6.4 mg, 0.020 mmol, 20 mol%). The tube was then evacuated and filled with argon. This cycle was repeated three times, and degassed 1,4-dioxane (0.5 mL) was added via syringe. The resulting solution was stirred at room temperature for 30 min, then at 60 °C for 48 h. After completion, the mixture was concentrated and purified by flash chromatography on silica gel (petroleum ether/EtOAc = 10/1–4/1) to give product **3s**: 46.1 mg, as a yellow solid, 90% yield; >19:1 dr; >19:1 *E/Z*; mp 82–84 °C;  $[\alpha]_D^{25} = -60.6$  ( $c = 0.1$ , in CHCl<sub>3</sub>); 91% ee, determined by HPLC analysis [Chiralpak column IA, *i*PrOH/*n*Hexane = 20/80, flow rate: 1.0 mL/min, 254 nm, *t* (major) = 17.84 min, *t* (minor) = 25.72 min]; **<sup>1</sup>H NMR** (400 MHz, CDCl<sub>3</sub>): δ (ppm) 7.61 (d, *J* = 1.8 Hz, 1H), 7.42–7.34 (m, 7H), 7.34–7.29 (m, 2H), 7.24–7.15 (m, 4H), 7.09 (dt, *J* = 7.9, 1.1 Hz, 1H), 7.03 (ddd, *J* = 8.0, 6.6, 1.2 Hz, 1H), 6.55 (dd, *J* = 3.7, 1.7 Hz, 1H), 6.20 (s, 1H), 5.60 (s, 2H), 4.94 (s, 1H), 3.60 (s, 3H); **<sup>13</sup>C NMR** (100 MHz, CDCl<sub>3</sub>): δ (ppm) 178.0, 165.8, 149.2, 147.5, 145.50, 145.47, 140.2, 136.4, 136.3, 131.3, 129.6, 129.2, 128.9, 128.6, 128.5, 128.0, 126.2, 126.0, 122.4, 121.2, 121.1, 120.8, 116.5, 112.5, 110.7, 109.0, 67.3, 54.0, 51.7, 47.9; **HRMS** (ESI-TOF) *m/z*: [M + Na]<sup>+</sup> Calcd for C<sub>33</sub>H<sub>24</sub>N<sub>2</sub>O<sub>4</sub>Na<sup>+</sup> 535.1629; Found 535.1627.

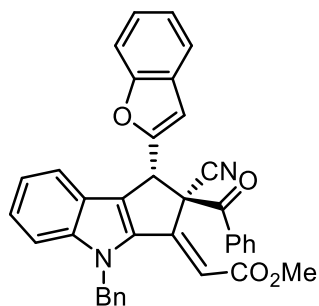

**Methyl (E)-2-((1S,2R)-1-(benzofuran-2-yl)-2-benzoyl-4-benzyl-2-cyano-1,4-dihydrocyclopenta[*b*]indol-3(2*H*)-ylidene)acetate (3t):** An oven-dried 10 mL Schlenk tube equipped with a magnetic stir bar was charged with 2-indolyl propiolate **1b** (28.9 mg, 0.0999 mmol, 1.0 equiv), enone **2s** (35.5 mg, 0.130 mmol, 1.3 equiv), Pd<sub>2</sub>(dba)<sub>3</sub> (4.6 mg, 0.0050 mmol, 5 mol%), ligand **L1** (6.9 mg, 0.010 mmol, 10 mol%) and TBAB (6.4 mg, 0.020 mmol, 20 mol%). The tube was then evacuated and filled with argon. This cycle was repeated three times, and degassed 1,4-dioxane (0.5 mL) was added via syringe. The resulting solution was stirred at room temperature for 30 min, then at 60 °C for 48 h. After completion, the mixture was concentrated and purified by flash chromatography on silica gel (petroleum ether/EtOAc = 10/1–6/1) to give product **3t**: 43.9 mg, as a yellow solid, 78% yield; >19:1 dr; >19:1 *E/Z*; mp 109–110 °C; [α]<sub>D</sub><sup>25</sup> = +18.4 (*c* = 0.25, in CHCl<sub>3</sub>); 98% ee, determined by HPLC analysis [Chiralpak column IB, *i*PrOH/*n*Hexane = 20/80, flow rate: 1.0 mL/min, 254 nm, *t* (major) = 13.48 min, *t* (minor) = 24.29 min]; **<sup>1</sup>H NMR** (400 MHz, CDCl<sub>3</sub>): δ (ppm) 8.11–8.06 (m, 2H), 7.53 (d, *J* = 7.5 Hz, 1H), 7.50–7.45 (m, 1H), 7.44–7.36 (m, 3H), 7.35–7.20 (m, 7H), 7.17–7.09 (m, 3H), 7.04 (ddd, *J* = 8.1, 6.7, 1.4 Hz, 1H), 6.65 (s, 1H), 6.12 (s, 1H), 5.52 (s, 2H), 5.22 (s, 1H), 3.49 (s, 3H); **<sup>13</sup>C NMR** (100 MHz, CDCl<sub>3</sub>): δ (ppm) 189.6, 165.7, 155.5, 152.8, 145.9, 145.4, 140.2, 136.1, 134.4, 133.4, 129.3, 128.5, 128.1, 127.93, 127.87, 126.3, 125.9, 124.8, 123.0, 122.4, 121.5, 121.4, 120.9, 116.6, 111.5, 110.8, 109.2, 107.5, 66.6, 51.7, 48.0, 47.7; **HRMS** (ESI-TOF) *m/z*: [M + Na]<sup>+</sup> Calcd for C<sub>37</sub>H<sub>26</sub>N<sub>2</sub>O<sub>4</sub>Na<sup>+</sup> 585.1785; Found 585.1792.

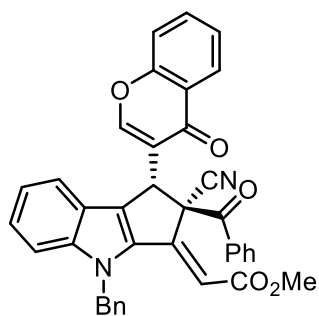

**Methyl (E)-2-((1S,2R)-2-benzoyl-4-benzyl-2-cyano-1-(4-oxo-4H-chromen-3-yl)-1,4-dihydrocyclopenta[*b*]indol-3(2*H*)-ylidene)acetate (3u):** An oven-dried 10 mL Schlenk tube equipped with a magnetic stir bar was charged with 2-indolyl propiolate **1b** (28.9 mg, 0.0999 mmol, 1.0 equiv), enone **2t** (39.1 mg, 0.130 mmol, 1.3 equiv), Pd<sub>2</sub>(dba)<sub>3</sub> (4.6 mg, 0.0050 mmol, 5 mol%), ligand **L1** (6.9 mg, 0.010 mmol, 10 mol%) and TBAB (6.4 mg, 0.020 mmol, 20 mol%). The tube was then evacuated and filled with argon. This cycle was repeated three times, and degassed 1,4-dioxane (0.5 mL) was added via syringe. The resulting solution was stirred at room temperature for 30 min, then at 60 °C for 48 h. After completion, the mixture was concentrated and purified by flash chromatography on silica gel (petroleum

ether/EtOAc = 10/1–4/1) to give product **3u**: 51.5 mg, as a yellow solid, 87% yield; >19:1 dr; >19:1 *E/Z*; mp 99–100 °C;  $[\alpha]_D^{25} = -96.0$  ( $c = 0.25$ , in  $\text{CHCl}_3$ ); 97% ee, determined by HPLC analysis [Chiralpak column AD, *i*PrOH/*n*Hexane = 20/80, flow rate: 1.0 mL/min, 254 nm,  $t$  (minor) = 21.50 min,  $t$  (major) = 44.83 min]; **<sup>1</sup>H NMR** (400 MHz,  $\text{CDCl}_3$ ):  $\delta$  (ppm) 8.31–8.20 (m, 1H), 7.93 (d,  $J = 7.8$  Hz, 2H), 7.81 (s, 1H), 7.70 (ddd,  $J = 8.7, 7.1, 1.7$  Hz, 1H), 7.56–7.48 (m, 1H), 7.49–7.43 (m, 2H), 7.43–7.29 (m, 8H), 7.21–7.07 (m, 3H), 6.16 (s, 1H), 5.79 (s, 1H), 5.60 (d,  $J = 2.4$  Hz, 2H), 3.53 (s, 3H); **<sup>13</sup>C NMR** (100 MHz,  $\text{CDCl}_3$ ):  $\delta$  (ppm) 188.7, 176.0, 165.4, 156.8, 156.4, 145.9, 145.5, 140.3, 136.1, 134.0, 134.0, 133.2, 129.3, 129.2, 129.0, 128.2, 128.1, 126.5, 126.4, 125.8, 125.6, 123.7, 121.8, 121.6, 121.3, 120.7, 118.3, 117.4, 111.0, 110.0, 69.2, 51.4, 47.9, 42.3; **HRMS** (ESI-TOF)  $m/z$ :  $[\text{M} + \text{Na}]^+$  Calcd for  $\text{C}_{38}\text{H}_{26}\text{N}_2\text{O}_5\text{Na}^+$  613.1734; Found 613.1739.

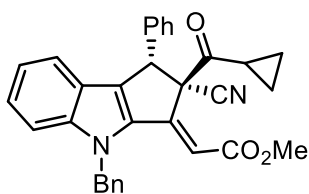

**Methyl (*E*)-2-((1*S*,2*R*)-4-benzyl-2-cyano-2-(cyclopropanecarbonyl)-1-phenyl-1,4-dihydrocyclopenta[*b*]indol-3(2*H*)-ylidene)acetate (**3v**):** An

oven-dried 10 mL Schlenk tube equipped with a magnetic stir bar was charged with 2-indolyl propiolate **1b** (28.9 mg, 0.0999 mmol, 1.0 equiv), enone **2u** (29.6 mg, 0.150 mmol, 1.5 equiv),  $\text{Pd}_2(\text{dba})_3$  (4.6 mg, 0.0050 mmol, 5 mol%) and ligand **L1** (6.9 mg, 0.010 mmol, 10 mol%). The tube was then evacuated and filled with argon. This cycle was repeated three times, and degassed 1,4-dioxane (0.5 mL) was added via syringe. The resulting solution was stirred at room temperature for 30 min. then at 80 °C for 72 h. After completion, the mixture was concentrated and purified by flash chromatography on silica gel (petroleum ether/EtOAc = 10/1–4/1) to give product **3v**: 39.4 mg, as a yellow solid, 81% yield; >19:1 dr; >19:1 *E/Z*; mp 86–87 °C;  $[\alpha]_D^{25} = -8.0$  ( $c = 0.25$ , in  $\text{CHCl}_3$ ); 85% ee, determined by HPLC analysis [Chiralpak column IB, *i*PrOH/*n*Hexane = 20/80, flow rate: 1.0 mL/min, 254 nm,  $t$  (major) = 9.74 min,  $t$  (minor) = 13.65 min]; **<sup>1</sup>H NMR** (400 MHz,  $\text{CDCl}_3$ ):  $\delta$  (ppm) 7.44–7.37 (m, 3H), 7.37–7.33 (m, 2H), 7.33–7.27 (m, 5H), 7.17–7.10 (m, 3H), 7.04 (ddd,  $J = 8.0, 6.2, 1.7$  Hz, 1H), 6.15 (s, 1H), 5.54 (s, 2H), 4.88 (s, 1H), 3.67 (s, 3H), 2.46 (tt,  $J = 7.7, 4.5$  Hz, 1H), 1.35 (ddt,  $J = 9.1, 4.4, 2.3$  Hz, 1H), 1.30–1.23 (m, 1H), 1.21–1.15 (m, 2H); **<sup>13</sup>C NMR** (100 MHz,  $\text{CDCl}_3$ ):  $\delta$  (ppm) 199.8, 165.8, 145.4, 145.1, 140.4, 137.0, 136.2, 131.4, 129.2, 129.1, 128.80, 128.77, 127.9, 126.1, 125.9, 122.4, 121.2, 121.0, 116.7, 110.7, 108.7, 69.9, 53.9, 51.6, 47.9, 18.4, 13.9, 12.4; **HRMS** (ESI-TOF)  $m/z$ :  $[\text{M} + \text{Na}]^+$  Calcd for  $\text{C}_{32}\text{H}_{26}\text{N}_2\text{O}_3\text{Na}^+$  509.1836; Found 509.1830.

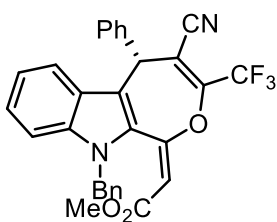

**Methyl (S,E)-2-(10-benzyl-4-cyano-5-phenyl-3-(trifluoromethyl)-5,10-dihydro-1H-oxepino[3,4-b]indol-1-ylidene)acetate (4a):** An oven-dried 10 mL Schlenk tube equipped with a magnetic stir bar was charged with 2-indolyl propiolate **1b** (28.9 mg, 0.0999 mmol, 1.0 equiv), enone **2v** (33.8 mg, 0.150 mmol, 1.5 equiv), Pd<sub>2</sub>(dba)<sub>3</sub> (4.6 mg, 0.0050 mmol, 5 mol%) and ligand **L1** (6.9 mg, 0.010 mmol, 10 mol%). The tube was then evacuated and filled with argon. This cycle was repeated three times, and degassed 1,4-dioxane (0.5 mL) was added via syringe. The resulting solution was stirred at room temperature for 30 min, then at 60 °C for 24 h. After completion, the mixture was concentrated and purified by flash chromatography on silica gel (petroleum ether/EtOAc = 20/1) to give product **4a**: 28.6 mg, as a yellow oil, 56% yield; >19:1 *E/Z*; [α]<sup>25</sup><sub>D</sub> = –48.0 (*c* = 0.25, in CHCl<sub>3</sub>); 87% ee, determined by HPLC analysis [Chiralpak column ID, *i*PrOH/*n*Hexane = 10/90, flow rate: 1.0 mL/min, 254 nm, *t* (minor) = 5.52 min, *t* (major) = 6.47 min]; <sup>1</sup>H NMR (400 MHz, CDCl<sub>3</sub>): δ (ppm) 7.71 (dd, *J* = 8.0, 1.1 Hz, 1H), 7.41–7.36 (m, 1H), 7.33 (ddd, *J* = 8.4, 6.9, 1.2 Hz, 1H), 7.26–7.19 (m, 9H), 6.90–6.85 (m, 2H), 5.85 (s, 1H), 5.39–5.33 (m, 2H), 5.17 (d, *J* = 16.5 Hz, 1H), 3.62 (s, 3H); <sup>13</sup>C NMR (100 MHz, CDCl<sub>3</sub>): δ (ppm) 164.2, 154.6, 149.3 (q, *J* = 35.0 Hz), 138.0, 137.5, 136.7, 128.8, 128.7, 127.8, 127.7, 126.8, 126.3, 125.2, 125.0, 124.4, 121.3, 120.5, 118.9, 118.3 (q, *J* = 275.8 Hz), 115.6, 111.4, 109.2, 103.0, 51.8, 48.0, 41.5; <sup>19</sup>F NMR (376 MHz, CDCl<sub>3</sub>): δ (ppm) –67.79; HRMS (ESI-TOF) *m/z*: [M + Na]<sup>+</sup> Calcd for C<sub>30</sub>H<sub>21</sub>F<sub>3</sub>N<sub>2</sub>O<sub>3</sub>Na<sup>+</sup> 537.1397; Found 537.1395.

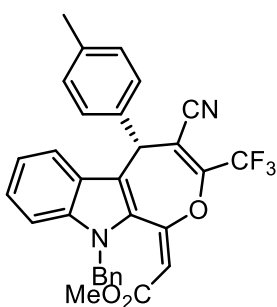

**Methyl (S,E)-2-(10-benzyl-4-cyano-5-(*p*-tolyl)-3-(trifluoromethyl)-5,10-dihydro-1H-oxepino[3,4-b]indol-1-ylidene)acetate (4b):** An oven-dried 10 mL Schlenk tube equipped with a magnetic stir bar was charged with 2-indolyl propiolate **1b** (28.9 mg, 0.0999 mmol, 1.0 equiv), enone **2w** (35.8 mg, 0.150 mmol, 1.5 equiv), Pd<sub>2</sub>(dba)<sub>3</sub> (4.6 mg, 0.0050 mmol, 5 mol%) and ligand **L1** (6.9 mg, 0.010 mmol, 10 mol%). The tube was then evacuated and filled with argon. This cycle was repeated three times, and degassed 1,4-dioxane (0.5 mL) was added via syringe. The resulting solution was stirred at room temperature for 30 min, then at 60 °C for 24 h. After completion, the mixture was concentrated and purified by flash chromatography on silica gel (petroleum ether/EtOAc = 20/1) to give product **4b**: 30.4 mg, as a yellow oil, 57% yield; >19:1 *E/Z*; [α]<sup>25</sup><sub>D</sub> = –10.9 (*c* = 1.52, in CHCl<sub>3</sub>); 92% ee, determined by HPLC analysis

[Chiralpak column ID, *i*PrOH/*n*Hexane = 10/90, flow rate: 1.0 mL/min, 254 nm, *t* (minor) = 5.89 min, *t* (major) = 8.07 min]; **<sup>1</sup>H NMR** (400 MHz, CDCl<sub>3</sub>): δ (ppm) 7.69 (d, *J* = 8.1 Hz, 1H), 7.41–7.29 (m, 2H), 7.24–7.18 (m, 4H), 7.13 (d, *J* = 8.3 Hz, 2H), 7.05 (d, *J* = 8.1 Hz, 2H), 6.91–6.82 (m, 2H), 5.87 (s, 1H), 5.36 (d, *J* = 16.5 Hz, 1H), 5.31 (s, 1H), 5.17 (d, *J* = 16.5 Hz, 1H), 3.64 (s, 3H), 2.29 (s, 3H); **<sup>13</sup>C NMR** (100 MHz, CDCl<sub>3</sub>): δ (ppm) 164.3, 154.7, 149.2 (q, *J* = 35.4 Hz), 137.6, 137.5, 136.8, 135.0, 129.4, 128.8, 127.8, 126.8, 126.3, 125.3, 125.0, 124.5, 121.3, 120.6, 119.0, 118.3 (q, *J* = 275.7 Hz), 115.7, 111.4, 109.1, 103.4, 51.9, 48.1, 41.4, 21.0; **<sup>19</sup>F NMR** (376 MHz, CDCl<sub>3</sub>): δ (ppm) –67.81; **HRMS** (ESI-TOF) *m/z*: [M + Na]<sup>+</sup> Calcd for C<sub>31</sub>H<sub>23</sub>F<sub>3</sub>N<sub>2</sub>O<sub>3</sub>Na<sup>+</sup> 551.1553; Found 551.1559.

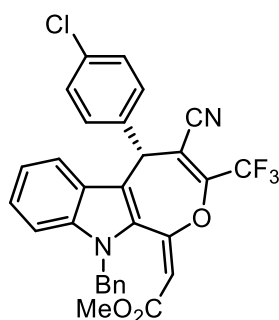

**Methyl (S,E)-2-(10-benzyl-5-(4-chlorophenyl)-4-cyano-3-(trifluoromethyl)-5,10-dihydro-1H-oxepino[3,4-b]indol-1-ylidene)acetate (4c):**

An oven-dried 10 mL Schlenk tube equipped with a magnetic stir bar was charged with 2-indolyl propiolate **1b** (28.9 mg, 0.0999 mmol, 1.0 equiv), enone **2x** (38.8 mg, 0.150 mmol, 1.5 equiv), Pd<sub>2</sub>(dba)<sub>3</sub> (4.6 mg, 0.0050 mmol, 5 mol%) and ligand **L1** (6.9 mg, 0.010 mmol, 10 mol%). The tube was then evacuated and filled with argon. This cycle was repeated three times, and degassed 1,4-dioxane (0.5 mL) was added via syringe. The resulting solution was stirred at room temperature for 30 min, then at 60 °C for 24 h. After completion, the mixture was concentrated and purified by flash chromatography on silica gel (petroleum ether/EtOAc = 20/1) to give product **4c**: 23.3 mg, as a yellow oil, 43% yield; >19:1 *E/Z*; [α]<sub>D</sub><sup>25</sup> = –14.9 (*c* = 1.16, in CHCl<sub>3</sub>); 90% ee, determined by HPLC analysis [Chiralpak column ID, *i*PrOH/*n*Hexane = 10/90, flow rate: 1.0 mL/min, 254 nm, *t* (minor) = 5.43 min, *t* (major) = 7.18 min]; **<sup>1</sup>H NMR** (400 MHz, CDCl<sub>3</sub>): δ (ppm) 7.70 (d, *J* = 8.1 Hz, 1H), 7.39 (dt, *J* = 8.5, 1.0 Hz, 1H), 7.34 (ddd, *J* = 8.4, 6.7, 1.1 Hz, 1H), 7.25–7.15 (m, 8H), 6.90–6.83 (m, 2H), 5.89 (s, 1H), 5.36 (d, *J* = 16.4 Hz, 1H), 5.30 (s, 1H), 5.15 (d, *J* = 16.4 Hz, 1H), 3.65 (s, 3H); **<sup>13</sup>C NMR** (100 MHz, CDCl<sub>3</sub>): δ (ppm) 164.2, 154.3, 149.6 (q, *J* = 35.6 Hz), 137.6, 136.59, 136.55, 133.7, 128.9, 128.8, 128.3, 127.8, 126.3, 125.4, 124.8, 124.4, 121.4, 119.8, 118.8, 118.2 (q, *J* = 275.9 Hz), 115.5, 111.5, 109.5, 102.5, 51.9, 48.1, 41.0; **<sup>19</sup>F NMR** (376 MHz, CDCl<sub>3</sub>): δ (ppm) –67.83; **HRMS** (ESI-TOF) *m/z*: [M + Na]<sup>+</sup> Calcd for C<sub>30</sub>H<sub>20</sub>ClF<sub>3</sub>N<sub>2</sub>O<sub>3</sub>Na<sup>+</sup> 571.1007 (<sup>35</sup>Cl), 572.1041 (<sup>37</sup>Cl); Found 571.1016 (<sup>35</sup>Cl), 572.1046 (<sup>37</sup>Cl)

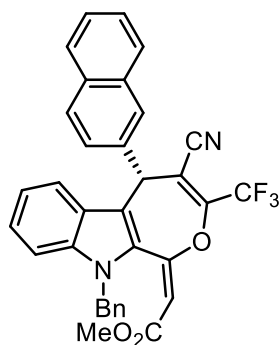

**Methyl (S,E)-2-(10-benzyl-4-cyano-5-(naphthalen-2-yl)-3-(trifluoromethyl)-5,10-dihydro-1H-oxepino[3,4-b]indol-1-ylidene)acetate (4d):**

An oven-dried 10 mL Schlenk tube equipped with a magnetic stir bar was charged with 2-indolyl propiolate **1b** (28.9 mg, 0.0999 mmol, 1.0 equiv), enone **2y** (41.2 mg, 0.150 mmol, 1.5 equiv), Pd<sub>2</sub>(dba)<sub>3</sub> (4.6 mg, 0.0050 mmol, 5 mol%) and ligand **L1** (6.9 mg, 0.010 mmol, 10 mol%). The tube was then evacuated and filled with argon. This cycle was repeated three times, and degassed 1,4-dioxane (0.5 mL) was added via syringe. The resulting solution was stirred at room temperature for 30 min, then stirred at 60 °C for 24 h. After completion, the mixture was concentrated and purified by flash chromatography on silica gel (petroleum ether/EtOAc = 20/1) to give product **4d**: 31.0 mg, as a yellow oil, 55% yield; >19:1 *E/Z*; [α]<sup>25</sup><sub>D</sub> = +91.3 (*c* = 1.38, in CHCl<sub>3</sub>); 93% ee, determined by HPLC analysis [Chiralpak column ID, *i*PrOH/*n*Hexane = 10/90, flow rate: 1.0 mL/min, 254 nm, *t* (minor) = 6.83 min, *t* (major) = 10.43 min]; <sup>1</sup>H NMR (400 MHz, CDCl<sub>3</sub>): δ (ppm) 7.83–7.71 (m, 3H), 7.63 (d, *J* = 6.7 Hz, 2H), 7.52–7.40 (m, 4H), 7.36 (dd, *J* = 8.2, 7.0 Hz, 1H), 7.28–7.18 (m, 4H), 6.94–6.83 (m, 2H), 5.78 (s, 1H), 5.51 (s, 1H), 5.40 (d, *J* = 16.5 Hz, 1H), 5.20 (d, *J* = 16.5 Hz, 1H), 3.59 (s, 3H); <sup>13</sup>C NMR (100 MHz, CDCl<sub>3</sub>): δ (ppm) 164.3, 154.8, 149.4 (q, *J* = 35.3 Hz), 137.7, 136.7, 135.2, 133.1, 132.6, 128.84, 128.77, 128.0, 127.8, 127.5, 126.4, 126.33, 126.32, 125.7, 125.3, 125.0, 124.9, 124.6, 121.4, 120.0, 119.0, 118.3 (q, *J* = 275.7 Hz), 115.8, 111.5, 109.0, 103.2, 51.8, 48.0, 41.6; <sup>19</sup>F NMR (376 MHz, CDCl<sub>3</sub>): δ (ppm) –67.81; HRMS (ESI-TOF) *m/z*: [M + Na]<sup>+</sup> Calcd for C<sub>34</sub>H<sub>23</sub>F<sub>3</sub>N<sub>2</sub>O<sub>3</sub>Na<sup>+</sup> 587.1553; Found 587.1562.

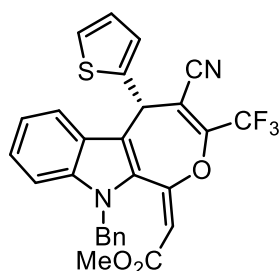

**Methyl (S,E)-2-(10-benzyl-4-cyano-5-(thiophen-2-yl)-3-(trifluoromethyl)-5,10-dihydro-1H-oxepino[3,4-b]indol-1-ylidene)acetate (4e):**

An oven-dried 10 mL Schlenk tube equipped with a magnetic stir bar was charged with 2-indolyl propiolate **1b** (28.9 mg, 0.0999 mmol, 1.0 equiv), enone **2z** (34.6 mg, 0.150 mmol, 1.5 equiv), Pd<sub>2</sub>(dba)<sub>3</sub> (4.6 mg, 0.0050 mmol, 5 mol%) and ligand **L1** (6.9 mg, 0.010 mmol, 10 mol%). The tube was then evacuated and filled with argon. This cycle was repeated three times, and degassed 1,4-dioxane (0.5 mL) was added via syringe. The resulting solution was stirred at room temperature for 30 min, then at 60 °C for 30 h. After completion, the mixture was concentrated and purified by flash chromatography on silica gel (petroleum ether/EtOAc = 20/1) to give product **4e**: 25.5 mg, as a yellow oil, 49% yield; >19:1 *E/Z*;

$[\alpha]_D^{25} = 42.6$  ( $c = 1.27$ , in  $\text{CHCl}_3$ ); 91% ee, determined by HPLC analysis [Chiralpak column ID,  $i\text{PrOH}/n\text{Hexane} = 10/90$ , flow rate: 1.0 mL/min, 254 nm,  $t$  (minor) = 6.88 min,  $t$  (major) = 8.63 min];  **$^1\text{H NMR}$**  (400 MHz,  $\text{CDCl}_3$ ):  $\delta$  (ppm) 7.62 (dt,  $J = 8.1, 1.0$  Hz, 1H), 7.30 (dt,  $J = 8.5, 1.0$  Hz, 1H), 7.27–7.21 (m, 1H), 7.17–7.10 (m, 5H), 6.86–6.70 (m, 4H), 5.92 (s, 1H), 5.40 (d,  $J = 1.5$  Hz, 1H), 5.29 (d,  $J = 16.5$  Hz, 1H), 5.11 (d,  $J = 16.4$  Hz, 1H), 3.58 (s, 3H);  **$^{13}\text{C NMR}$**  (100 MHz,  $\text{CDCl}_3$ ):  $\delta$  (ppm) 164.2, 154.3, 149.8 (q,  $J = 35.4$  Hz), 141.7, 137.4, 136.7, 128.9, 127.8, 126.9, 126.4, 126.0, 125.7, 125.3, 124.7, 124.4, 121.4, 119.8, 118.9, 118.3 (q,  $J = 276.0$  Hz), 115.2, 111.5, 110.2, 101.9, 52.0, 48.2, 38.1;  **$^{19}\text{F NMR}$**  (376 MHz,  $\text{CDCl}_3$ ):  $\delta$  (ppm) –67.86; **HRMS** (ESI-TOF)  $m/z$ :  $[\text{M} + \text{Na}]^+$  Calcd for  $\text{C}_{28}\text{H}_{19}\text{F}_3\text{N}_2\text{O}_3\text{SNa}^+$  543.0961; Found 543.0966.

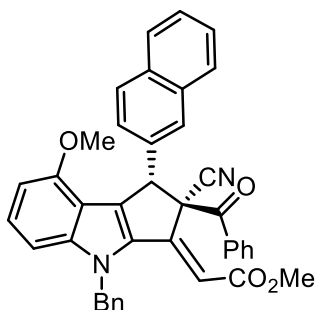

**Methyl (E)-2-((1S,2R)-2-benzoyl-4-benzyl-2-cyano-8-methoxy-1-(naphthalen-2-yl)-1,4-dihydrocyclopenta[b]indol-3(2H)-ylidene)acetate (3w):**

An oven-dried 10 mL Schlenk tube equipped with a magnetic stir bar was charged with 2-indolyl propiolate **1c** (31.9 mg, 0.0999 mmol, 1.0 equiv), enone **2h** (42.4 mg, 0.150 mmol, 1.5 equiv),  $\text{Pd}_2(\text{dba})_3$  (4.6 mg, 0.0050 mmol, 5 mol%), ligand **L1** (6.9 mg, 0.010 mmol, 10 mol%) and TBAB (6.4 mg, 0.020 mmol, 20 mol%). The tube was then evacuated and filled with argon. This cycle was repeated three times, and degassed 1,4-dioxane (0.5 mL) was added via syringe. The resulting solution was stirred at room temperature for 30 min, then at 80 °C for 48 h. After completion, the mixture was concentrated and purified by flash chromatography on silica gel (petroleum ether/EtOAc = 10/1–6/1) to give product **3w**: 48.3 mg, as a yellow solid, 80% yield; >19:1 dr; >19:1 *E/Z*; mp 140–141 °C;  $[\alpha]_D^{25} = +112.0$  ( $c = 0.25$ , in  $\text{CHCl}_3$ ); 93% ee, determined by HPLC analysis [Chiralpak column IB,  $i\text{PrOH}/n\text{Hexane} = 20/80$ , flow rate: 1.0 mL/min, 254 nm,  $t$  (major) = 17.86 min,  $t$  (minor) = 34.82 min];  **$^1\text{H NMR}$**  (400 MHz,  $\text{CDCl}_3$ ):  $\delta$  (ppm) 8.03 (d,  $J = 7.9$  Hz, 2H), 7.85–7.79 (m, 3H), 7.57 (d,  $J = 7.4$  Hz, 1H), 7.50–7.44 (m, 2H), 7.44–7.36 (m, 5H), 7.32 (d,  $J = 7.3$  Hz, 2H), 7.22–7.16 (m, 3H), 6.91 (d,  $J = 8.5$  Hz, 1H), 6.32 (d,  $J = 7.8$  Hz, 1H), 6.16 (s, 1H), 5.57 (s, 2H), 5.25 (s, 1H), 3.55 (s, 3H), 3.24 (s, 3H);  **$^{13}\text{C NMR}$**  (100 MHz,  $\text{CDCl}_3$ ):  $\delta$  (ppm) 189.8, 165.9, 154.6, 146.9, 146.5, 138.9, 136.3, 134.2, 133.30, 133.26, 133.2, 132.2, 129.3, 129.2, 128.9, 128.6, 128.42, 128.36, 128.0, 127.8, 127.7, 127.5, 127.2, 126.4, 126.0, 125.9, 117.5, 114.2, 107.9, 103.3, 101.1, 68.0, 55.0, 54.4, 51.5, 48.2; **HRMS** (ESI-TOF)  $m/z$ :  $[\text{M} + \text{Na}]^+$  Calcd for  $\text{C}_{40}\text{H}_{30}\text{N}_2\text{O}_4\text{Na}^+$  625.2098; Found 625.2088.



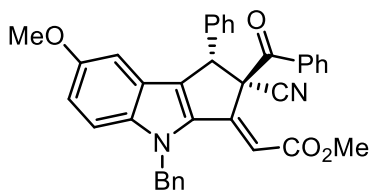

**Methyl (*E*)-2-((1*S*,2*R*)-2-benzoyl-4-benzyl-2-cyano-7-methoxy-1-phenyl-1,4-dihydrocyclopenta[*b*]indol-3(2*H*)-ylidene)acetate (**3x**):**

An oven-dried 10 mL Schlenk tube equipped with a magnetic stir bar was charged with 2-indolyl propiolate **1d** (31.9 mg, 0.0999 mmol, 1.0 equiv), enone **2a** (30.3 mg, 0.130 mmol, 1.3 equiv), Pd<sub>2</sub>(dba)<sub>3</sub> (4.6 mg, 0.0050 mmol, 5 mol%), ligand **L1** (6.9 mg, 0.010 mmol, 10 mol%) and TBAB (6.4 mg, 0.020 mmol, 20 mol%). The tube was then evacuated and filled with argon. This cycle was repeated three times, and degassed 1,4-dioxane (0.5 mL) was added via syringe. The resulting solution was stirred at room temperature for 30 min, then at 60 °C for 48 h. After completion, the mixture was concentrated and purified by flash chromatography on silica gel (petroleum ether/EtOAc = 10/1–6/1) to give product **3x**: 50.8 mg, as a yellow solid, 92% yield; >19:1 dr; >19:1 *E/Z*; mp 102–104 °C; [α]<sup>25</sup><sub>D</sub> = –8.0 (*c* = 0.25, in CHCl<sub>3</sub>); 91% ee, determined by HPLC analysis [Chiralpak column IB, *i*PrOH/*n*Hexane = 20/80, flow rate: 1.0 mL/min, 254 nm, *t* (major) = 22.03 min, *t* (minor) = 35.29 min]; <sup>1</sup>H NMR (400 MHz, CDCl<sub>3</sub>): δ (ppm) 7.91 (d, *J* = 7.1 Hz, 2H), 7.59–7.52 (m, 1H), 7.44–7.33 (m, 7H), 7.34–7.30 (m, 1H), 7.29–7.22 (m, 3H), 7.16 (dd, *J* = 7.4, 2.2 Hz, 2H), 6.99 (dd, *J* = 9.1, 2.5 Hz, 1H), 6.47 (d, *J* = 2.5 Hz, 1H), 6.12 (s, 1H), 5.56 (s, 2H), 5.04 (s, 1H), 3.64 (s, 3H), 3.54 (s, 3H); <sup>13</sup>C NMR (100 MHz, CDCl<sub>3</sub>): δ (ppm) 189.7, 165.7, 154.9, 146.5, 140.8, 140.3, 136.4, 136.2, 134.3, 133.3, 130.5, 129.6, 129.2, 129.0, 128.9, 128.7, 128.4, 128.0, 125.8, 122.8, 117.1, 116.8, 111.6, 108.7, 101.8, 68.8, 55.7, 53.4, 51.5, 48.0; HRMS (ESI-TOF) *m/z*: [M + Na]<sup>+</sup> Calcd for C<sub>36</sub>H<sub>28</sub>N<sub>2</sub>O<sub>4</sub>Na<sup>+</sup> 575.1942; Found 575.1948.

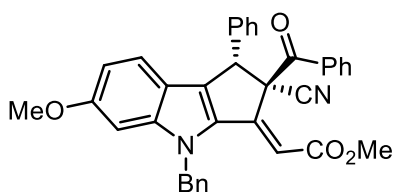

**Methyl (*E*)-2-((1*S*,2*R*)-2-benzoyl-4-benzyl-2-cyano-6-methoxy-1-phenyl-1,4-dihydrocyclopenta[*b*]indol-3(2*H*)-ylidene)acetate (**3y**):**

An oven-dried 10 mL Schlenk tube equipped with a magnetic stir bar was charged with 2-indolyl propiolate **1e** (31.9 mg, 0.0999 mmol, 1.0 equiv), enone **2a** (30.3 mg, 0.130 mmol, 1.3 equiv), Pd<sub>2</sub>(dba)<sub>3</sub> (4.6 mg, 0.0050 mmol, 5 mol%), ligand **L1** (6.9 mg, 0.010 mmol, 10 mol%) and TBAB (6.4 mg, 0.020 mmol, 20 mol%). The tube was then evacuated and filled with argon. This cycle was repeated three times, and degassed 1,4-dioxane (0.5 mL) was added via syringe. The resulting solution was stirred at room temperature for 30 min, then at 60 °C for 48 h. After completion, the mixture was concentrated and purified by flash chromatography on silica gel (petroleum ether/EtOAc = 10/1–6/1) to give product **3y**: 52.8 mg, as a

yellow solid, 95% yield; >19:1 dr; >19:1 *E/Z*; mp 105–107 °C;  $[\alpha]_D^{25} = -26.4$  ( $c = 0.25$ , in  $\text{CHCl}_3$ ); 86% ee, determined by HPLC analysis [Chiralpak column ID, *i*PrOH/*n*Hexane = 20/80, flow rate: 1.0 mL/min, 254 nm,  $t$  (major) = 40.89 min,  $t$  (minor) = 52.68 min];  $^1\text{H NMR}$  (400 MHz,  $\text{CDCl}_3$ ):  $\delta$  (ppm) 7.90 (d,  $J = 7.0$  Hz, 2H), 7.54 (t,  $J = 7.4$  Hz, 1H), 7.42–7.35 (m, 7H), 7.35–7.29 (m, 2H), 7.24–7.21 (m, 1H), 7.19 (dd,  $J = 7.5, 2.1$  Hz, 2H), 7.00 (d,  $J = 8.8$  Hz, 1H), 6.77 (d,  $J = 2.1$  Hz, 1H), 6.70 (dd,  $J = 8.8, 2.2$  Hz, 1H), 6.05 (s, 1H), 5.53 (s, 2H), 5.02 (s, 1H), 3.80 (s, 3H), 3.52 (s, 3H);  $^{13}\text{C NMR}$  (100 MHz,  $\text{CDCl}_3$ ):  $\delta$  (ppm) 189.7, 165.9, 159.7, 146.9, 146.4, 139.2, 136.4, 136.2, 134.3, 133.2, 132.0, 129.6, 129.2, 129.0, 128.8, 128.6, 128.3, 128.0, 125.9, 122.0, 116.9, 116.8, 111.8, 107.1, 93.6, 68.8, 55.6, 53.4, 51.4, 47.9; **HRMS** (ESI-TOF)  $m/z$ :  $[\text{M} + \text{Na}]^+$  Calcd for  $\text{C}_{36}\text{H}_{28}\text{N}_2\text{O}_4\text{Na}^+$  575.1942; Found 575.1945.

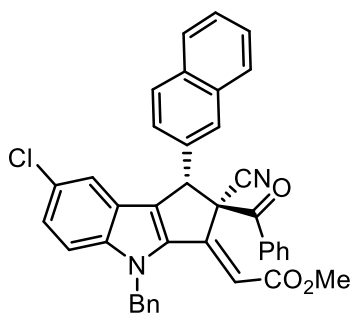

**Methyl (E)-2-((1S,2R)-2-benzoyl-4-benzyl-7-chloro-2-cyano-1-(naphthalen-2-yl)-1,4-dihydrocyclopenta[*b*]indol-3(2H)-ylidene)acetate (3z):**

An oven-dried 10 mL Schlenk tube equipped with a magnetic stir bar was charged with 2-indolyl propiolate **1f** (32.3 mg, 0.0997 mmol, 1.0 equiv), enone **2h** (42.4 mg, 0.150 mmol, 1.5 equiv),  $\text{Pd}_2(\text{dba})_3$  (4.6 mg, 0.0050 mmol, 5 mol%), ligand **L1** (6.9 mg, 0.010 mmol, 10 mol%) and TBAB (6.4 mg, 0.020 mmol, 20 mol%). The tube was then evacuated and filled with argon. This cycle was repeated three times, and degassed 1,4-dioxane (0.5 mL) was added via syringe. The resulting solution was stirred at room temperature for 30 min, then at 80 °C for 30 h. After completion, the mixture was concentrated and purified by flash chromatography on silica gel (petroleum ether/EtOAc = 10/1–6/1) to give product **3z**: 39.0 mg, as a yellow solid, 64% yield; >19:1 dr; >19:1 *E/Z*; mp 131–132 °C;  $[\alpha]_D^{25} = +16.0$  ( $c = 0.25$ , in  $\text{CHCl}_3$ ); 91% ee, determined by HPLC analysis [Chiralpak column IB, *i*PrOH/*n*Hexane = 20/80, flow rate: 1.0 mL/min, 254 nm,  $t$  (major) = 18.01 min,  $t$  (minor) = 39.70 min];  $^1\text{H NMR}$  (600 MHz,  $\text{CDCl}_3$ ):  $\delta$  (ppm) 7.99 (d,  $J = 7.8$  Hz, 2H), 7.92–7.86 (m, 2H), 7.80 (d,  $J = 7.8$  Hz, 1H), 7.74 (s, 1H), 7.60 (d,  $J = 7.5$  Hz, 1H), 7.58–7.50 (m, 2H), 7.45–7.39 (m, 4H), 7.36 (dd,  $J = 8.5, 6.0$  Hz, 1H), 7.34–7.27 (m, 3H), 7.19 (d,  $J = 7.3$  Hz, 2H), 7.04 (s, 1H), 6.24 (s, 1H), 5.61 (s, 2H), 5.18 (s, 1H), 3.58 (s, 3H);  $^{13}\text{C NMR}$  (150 MHz,  $\text{CDCl}_3$ ):  $\delta$  (ppm) 189.7, 165.6, 146.4, 143.7, 141.2, 135.8, 134.3, 133.61, 133.58, 133.5, 133.2, 130.5, 129.4, 129.3, 129.2, 128.8, 128.5, 128.24, 128.15, 127.9, 127.2, 126.8, 126.64, 126.60, 126.5, 125.8, 123.3, 120.2, 116.9, 111.9, 110.0, 68.1, 53.7, 51.7, 48.1; **HRMS** (ESI-TOF)  $m/z$ :  $[\text{M} + \text{Na}]^+$  Calcd for

C<sub>39</sub>H<sub>27</sub>ClN<sub>2</sub>O<sub>3</sub>Na<sup>+</sup> 629.1603 (<sup>35</sup>Cl), 630.1636 (<sup>37</sup>Cl); Found 629.1603 (<sup>35</sup>Cl), 630.1636 (<sup>37</sup>Cl).

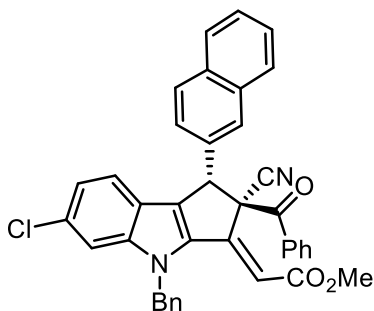

**Methyl (E)-2-((1S,2R)-2-benzoyl-4-benzyl-6-chloro-2-cyano-1-(naphthalen-2-yl)-1,4-dihydrocyclopenta[b]indol-3(2H)-ylidene)acetate (3aa):**

An oven-dried 10 mL Schlenk tube equipped with a magnetic stir bar was charged with 2-indolyl propiolate **1g** (32.3 mg, 0.0997 mmol, 1.0 equiv), enone **2h** (42.4 mg, 0.150 mmol, 1.5 equiv), Pd<sub>2</sub>(dba)<sub>3</sub> (4.6 mg, 0.0050 mmol, 5 mol%), ligand **L1** (6.9 mg, 0.010 mmol, 10 mol%) and TBAB (6.4 mg, 0.020 mmol, 20 mol%). The tube was then evacuated and filled with argon. This cycle was repeated three times, and degassed 1,4-dioxane (0.5 mL) was added via syringe. The resulting solution was stirred at room temperature for 30 min, then at 80 °C for 30 h. After completion, the mixture was concentrated and purified by flash chromatography on silica gel (petroleum ether/EtOAc = 10/1–6/1) to give product **3aa**: 34.5 mg, as a yellow solid, 57% yield; >19:1 dr; >19:1 *E/Z*; mp 138–140 °C; [α]<sub>D</sub><sup>25</sup> = +27.2 (*c* = 0.25, in CHCl<sub>3</sub>); 93% ee, determined by HPLC analysis [Chiralpak column IB, *i*PrOH/*n*Hexane = 20/80, flow rate: 1.0 mL/min, 254 nm, *t* (major) = 14.77 min, *t* (minor) = 33.84 min]; **<sup>1</sup>H NMR** (400 MHz, CDCl<sub>3</sub>): δ (ppm) 7.97 (d, *J* = 7.0 Hz, 2H), 7.86 (dd, *J* = 8.8, 4.7 Hz, 2H), 7.79–7.75 (m, 1H), 7.73–7.69 (m, 1H), 7.60–7.55 (m, 1H), 7.53–7.48 (m, 2H), 7.45–7.35 (m, 6H), 7.27 (dd, *J* = 8.6, 1.9 Hz, 1H), 7.19 (d, *J* = 6.9 Hz, 2H), 6.96 (d, *J* = 1.1 Hz, 2H), 6.19 (s, 1H), 5.57 (s, 2H), 5.18 (s, 1H), 3.55 (s, 3H); **<sup>13</sup>C NMR** (100 MHz, CDCl<sub>3</sub>): δ (ppm) 189.7, 165.6, 146.3, 145.7, 140.8, 135.7, 134.3, 133.7, 133.5, 133.4, 133.2, 132.4, 131.3, 129.4, 129.22, 129.17, 128.7, 128.5, 128.2, 128.1, 127.9, 126.7, 126.6, 126.4, 125.8, 122.3, 121.8, 121.0, 116.9, 110.8, 109.5, 68.2, 53.6, 51.7, 48.1; **HRMS** (ESI-TOF) *m/z*: [M + Na]<sup>+</sup> Calcd for C<sub>39</sub>H<sub>27</sub>ClN<sub>2</sub>O<sub>3</sub>Na<sup>+</sup> 629.1603 (<sup>35</sup>Cl), 630.1636 (<sup>37</sup>Cl); Found 629.1601 (<sup>35</sup>Cl), 630.1628 (<sup>37</sup>Cl).

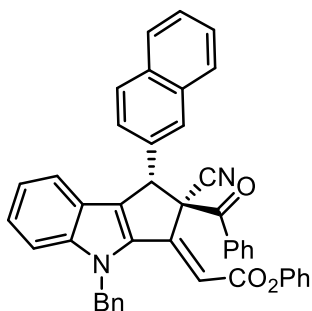

**Phenyl (E)-2-((1S,2R)-2-benzoyl-4-benzyl-2-cyano-1-(naphthalen-2-yl)-1,4-dihydrocyclopenta[b]indol-3(2H)-ylidene)acetate (3ab):**

An oven-dried 10 mL Schlenk tube equipped with a magnetic stir bar was charged with 2-indolyl propiolate **1h** (35.1 mg, 0.0999 mmol, 1.0 equiv), enone **2h** (42.4 mg, 0.150 mmol, 1.5 equiv), Pd<sub>2</sub>(dba)<sub>3</sub> (4.6 mg, 0.0050 mmol, 5 mol%), ligand **L1** (6.9 mg, 0.010 mmol, 10 mol%) and TBAB (6.4 mg, 0.020 mmol, 20 mol%). The tube was then evacuated and filled with argon. This cycle was

repeated three times, and degassed 1,4-dioxane (0.5 mL) was added via syringe. The resulting solution was stirred at room temperature for 30 min, then at 80 °C for 48 h. After completion, the mixture was concentrated and then purified by flash chromatography on silica gel (petroleum ether/EtOAc = 10/1–6/1) to give product **3ab**: 39.4 mg, as a yellow solid, 62% yield; >19:1 dr; >19:1 *E/Z*; mp 100–101 °C;  $[\alpha]_D^{25} = +72.4$  ( $c = 0.25$ , in CHCl<sub>3</sub>); 90% ee, determined by HPLC analysis [Chiralpak column IB, *i*PrOH/*n*Hexane = 20/80, flow rate: 1.0 mL/min, 254 nm,  $t$  (major) = 13.43 min,  $t$  (minor) = 17.00 min]; **<sup>1</sup>H NMR** (400 MHz, CDCl<sub>3</sub>):  $\delta$  (ppm) 7.93 (d,  $J = 7.4$  Hz, 2H), 7.85 (d,  $J = 8.7$  Hz, 2H), 7.80–7.72 (m, 2H), 7.57–7.47 (m, 3H), 7.46–7.30 (m, 8H), 7.29–7.24 (m, 4H), 7.10 (dd,  $J = 14.6, 7.5$  Hz, 2H), 7.01 (t,  $J = 7.4$  Hz, 1H), 6.97–6.92 (m, 2H), 6.40 (s, 1H), 5.68 (s, 2H), 5.24 (s, 1H); **<sup>13</sup>C NMR** (100 MHz, CDCl<sub>3</sub>):  $\delta$  (ppm) 189.4, 163.8, 150.2, 148.1, 145.8, 140.1, 136.2, 134.2, 133.9, 133.5, 133.4, 133.2, 132.4, 129.3, 129.3, 129.23, 129.19, 128.6, 128.4, 128.1, 127.9, 126.8, 126.6, 126.5, 126.3, 126.0, 125.7, 122.5, 121.5, 121.44, 121.42, 121.2, 116.8, 110.8, 108.5, 68.4, 53.8, 48.1; **HRMS** (ESI-TOF)  $m/z$ :  $[M + Na]^+$  Calcd for C<sub>44</sub>H<sub>30</sub>N<sub>2</sub>O<sub>3</sub>Na<sup>+</sup> 657.2149; Found 657.2152.

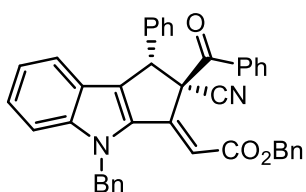

**Benzyl (E)-2-((1S,2R)-2-benzoyl-4-benzyl-2-cyano-1-phenyl-1,4-**

**dihydrocyclopenta[b]indol-3(2H)-ylidene)acetate (3ac):** An oven-dried

10 mL Schlenk tube equipped with a magnetic stir bar was charged with 2-indolyl propiolate **1i** (36.5 mg, 0.0999 mmol, 1.0 equiv), enone **2a** (30.3 mg, 0.130 mmol, 1.3 equiv), Pd<sub>2</sub>(dba)<sub>3</sub> (4.6 mg, 0.0050 mmol, 5 mol%), ligand **L1** (6.9 mg, 0.010 mmol, 10 mol%) and TBAB (6.4 mg, 0.020 mmol, 20 mol%). The tube was then evacuated and filled with argon. This cycle was repeated three times, and degassed 1,4-dioxane (0.5 mL) was added via syringe. The resulting solution was stirred at room temperature for 30 min, then at 60 °C for 48 h. After completion, the mixture was concentrated and purified by flash chromatography on silica gel (petroleum ether/ EtOAc = 10/1–6/1) to give product **3ac**: 48.6 mg, as a yellow solid, 81% yield; >19:1 dr; >19:1 *E/Z*; mp 88–89 °C;  $[\alpha]_D^{25} = +2.4$  ( $c = 0.25$ , in CHCl<sub>3</sub>); 93% ee, determined by HPLC analysis [Chiralpak column AD, *i*PrOH/*n*Hexane = 20/80, flow rate: 1.0 mL/min, 254 nm,  $t$  (major) = 21.62 min,  $t$  (minor) = 26.97 min]; **<sup>1</sup>H NMR** (400 MHz, CDCl<sub>3</sub>):  $\delta$  (ppm) 7.91–7.85 (m, 2H), 7.57–7.51 (m, 1H), 7.43–7.36 (m, 6H), 7.37–7.33 (m, 4H), 7.32–7.24 (m, 5H), 7.19 (dd,  $J = 6.7, 2.9$  Hz, 2H), 7.18–7.14 (m, 2H), 7.11 (d,  $J = 7.9$  Hz, 1H), 7.04 (ddd,  $J = 8.0, 6.4, 1.4$  Hz, 1H), 6.21 (s, 1H), 5.57 (s, 2H), 5.06 (s, 1H), 5.01 (s, 2H); **<sup>13</sup>C NMR** (100 MHz, CDCl<sub>3</sub>):  $\delta$  (ppm) 189.6, 165.4,

147.0, 145.5, 140.1, 136.4, 136.2, 135.5, 134.3, 133.2, 131.7, 129.7, 129.2, 129.1, 128.9, 128.7, 128.45, 128.39, 128.3, 128.2, 128.0, 126.3, 126.0, 122.5, 121.3, 121.1, 116.9, 110.8, 108.9, 68.7, 66.4, 53.5, 47.9; **HRMS** (ESI-TOF)  $m/z$ :  $[M + Na]^+$  Calcd for  $C_{41}H_{30}N_2O_3Na^+$  621.2149; Found 621.2148.

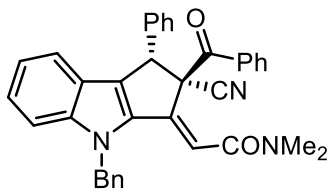

**(E)-2-((1S,2R)-2-benzoyl-4-benzyl-2-cyano-1-phenyl-1,4-dihydrocyclopenta[b]indol-3(2H)-ylidene)-N,N-dimethylacetamide (3ad):** An

oven-dried 10 mL Schlenk tube equipped with a magnetic stir bar was charged with 2-indolyl propiolamide **1j** (30.2 mg, 0.0999 mmol, 1.0 equiv), enone **2a** (30.3 mg, 0.130 mmol, 1.3 equiv),  $Pd_2(dba)_3$  (4.6 mg, 0.0050 mmol, 5 mol%), ligand **L1** (6.9 mg, 0.010 mmol, 10 mol%) and TBAB (6.4 mg, 0.020 mmol, 20 mol%). The tube was then evacuated and filled with argon. This cycle was repeated three times, and degassed 1,4-dioxane (0.5 mL) was added via syringe. The resulting solution was stirred at room temperature for 30 min, then at 60 °C for 48 h. After completion, the mixture was concentrated and purified by flash chromatography on silica gel (petroleum ether/ EtOAc = 3/1–1/1) to give product **3ad**: 41.9 mg, as a yellow solid, 78% yield; >19:1 dr; >19:1 *E/Z*; mp 132–134 °C;  $[\alpha]_D^{25} = -22.4$  ( $c = 0.25$ , in  $CHCl_3$ ); 97% ee, determined by HPLC analysis [Chiralpak column AD, *i*PrOH/*n*Hexane = 40/60, flow rate: 1.0 mL/min, 254 nm,  $t$  (minor) = 11.66 min,  $t$  (major) = 16.46 min];  **$^1H$  NMR** (400 MHz,  $CDCl_3$ ):  $\delta$  (ppm) 7.89 (dd,  $J = 8.2, 1.4$  Hz, 2H), 7.53–7.46 (m, 1H), 7.44–7.28 (m, 10H), 7.29–7.25 (m, 2H), 7.20–7.12 (m, 3H), 7.06 (t,  $J = 7.5$  Hz, 1H), 6.30 (s, 1H), 5.64 (d,  $J = 17.7$  Hz, 1H), 5.58 (d,  $J = 17.8$  Hz, 1H), 5.06 (s, 1H), 2.74 (s, 3H), 2.47 (s, 3H);  **$^{13}C$  NMR** (100 MHz,  $CDCl_3$ ):  $\delta$  (ppm) 189.5, 164.9, 145.1, 143.0, 141.1, 136.8, 136.8, 135.0, 132.6, 129.6, 129.3, 129.2, 129.0, 128.6, 128.5, 128.0, 127.9, 125.52, 125.46, 122.6, 121.0, 120.9, 117.4, 110.1, 109.7, 68.3, 53.5, 47.7, 36.8, 35.5; **HRMS** (ESI-TOF)  $m/z$ :  $[M + Na]^+$  Calcd for  $C_{36}H_{29}N_3O_2Na^+$  558.2152; Found 558.2147.

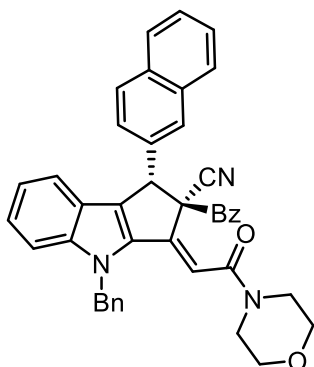

**(1S,2R,E)-2-benzoyl-4-benzyl-3-(2-morpholino-2-oxoethylidene)-1-(naphthalen-2-yl)-1,2,3,4-tetrahydrocyclopenta[b]indole-2-carbonitrile (3ae):** An

oven-dried 10 mL Schlenk tube equipped with a magnetic stir bar was charged with 2-indolyl propiolamide **1k** (34.4 mg, 0.0999 mmol, 1.0 equiv), enone **2h** (42.4 mg, 0.150 mmol, 1.5 equiv),  $Pd_2(dba)_3$  (4.6 mg, 0.0050 mmol, 5 mol%), ligand **L1** (6.9 mg, 0.010 mmol, 10 mol%) and TBAB (6.4 mg, 0.020 mmol, 20 mol%). The tube was then

evacuated and filled with argon. This cycle was repeated three times, and degassed 1,4-dioxane (0.5 mL) was added via syringe. The resulting solution was stirred at room temperature for 30 min, then at 80 °C for 24 h. After completion, the mixture was concentrated and purified by flash chromatography on silica gel (petroleum ether/ EtOAc = 3/1–1/1) to give product **3ae**: 45.1 mg, as a yellow solid, 72% yield; >19:1 dr; >19:1 *E/Z*; mp 145–147 °C;  $[\alpha]_D^{25} = +2.4$  ( $c = 0.25$ , in  $\text{CHCl}_3$ ); 97% ee, determined by HPLC analysis [Chiralpak column AD, *i*PrOH/*n*Hexane = 40/60, flow rate: 1.0 mL/min, 254 nm,  $t$  (minor) = 14.49 min,  $t$  (major) = 17.03 min];  $^1\text{H NMR}$  (400 MHz,  $\text{CDCl}_3$ ):  $\delta$  (ppm) 7.89 (dd,  $J = 8.0, 1.4$  Hz, 2H), 7.85 (d,  $J = 8.6$  Hz, 2H), 7.82–7.75 (m, 2H), 7.55–7.45 (m, 3H), 7.43 (d,  $J = 8.6$  Hz, 1H), 7.42–7.39 (m, 1H), 7.38–7.27 (m, 6H), 7.19–7.15 (m, 2H), 7.12 (d,  $J = 8.0$  Hz, 1H), 7.03 (ddd,  $J = 8.0, 6.9, 0.9$  Hz, 1H), 6.17 (s, 1H), 5.66 (d,  $J = 17.8$  Hz, 1H), 5.59 (d,  $J = 17.8$  Hz, 1H), 5.27 (s, 1H), 3.49–3.40 (m, 1H), 3.37 (m, 2H), 3.33–3.21 (m, 2H), 3.07–2.94 (m, 1H), 2.71 (ddd,  $J = 13.6, 6.5, 3.0$  Hz, 1H), 2.59–2.47 (m, 1H);  $^{13}\text{C NMR}$  (100 MHz,  $\text{CDCl}_3$ ):  $\delta$  (ppm) 189.3, 163.9, 145.2, 143.6, 141.0, 137.1, 134.7, 134.2, 133.5, 133.2, 132.8, 129.30, 129.27, 129.0, 128.9, 128.5, 128.2, 128.1, 127.84, 127.79, 126.9, 126.3, 126.2, 125.7, 125.5, 122.7, 121.2, 121.0, 117.3, 110.1, 109.6, 68.3, 66.7, 66.4, 53.6, 47.6, 45.8, 42.0; **HRMS** (ESI-TOF)  $m/z$ :  $[\text{M} + \text{Na}]^+$  Calcd for  $\text{C}_{42}\text{H}_{33}\text{N}_3\text{O}_3\text{Na}^+$  650.2415; Found 650.2421.

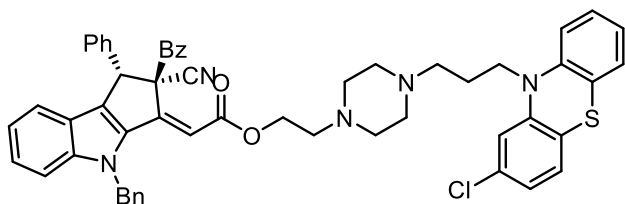

**2-(4-(3-(2-chloro-10*H*-phenothiazin-10-yl)propyl)piperazin-1-yl)ethyl (*E*)-2-((1*S*,2*R*)-2-benzoyl-4-benzyl-2-cyano-1-phenyl-1,4-dihydrocyclopenta[*b*]indol-3(2*H*)-ylidene)**

**acetate (3af)**: An oven-dried 10 mL Schlenk tube equipped with a magnetic stir bar was charged with 2-indolyl propiolate **11** (66.1 mg, 0.0999 mmol, 1.0 equiv), enone **2a** (30.3 mg, 0.130 mmol, 1.3 equiv),  $\text{Pd}_2(\text{dba})_3$  (4.6 mg, 0.0050 mmol, 5 mol%), ligand **L1** (6.9 mg, 0.010 mmol, 10 mol%) and TBAB (6.4 mg, 0.020 mmol, 20 mol%). The tube was then evacuated and filled with argon. This cycle was repeated three times, and degassed 1,4-dioxane (0.5 mL) was added via syringe. The resulting solution was stirred at room temperature for 30 min, then at 60 °C for 48 h. After completion, the mixture was concentrated and purified by flash chromatography on silica gel (petroleum ether/EtOAc = 3/1–1/1) to give product **3af**: 50.1 mg, as a yellow solid, 56% yield; 9:1 dr; >19:1 *E/Z*; mp 73–75 °C;  $[\alpha]_D^{25} = -10.2$  ( $c = 0.25$ , in  $\text{CHCl}_3$ ); 92% ee, determined by HPLC analysis [Chiralpak column AD, *i*PrOH/*n*Hexane = 40/60, flow rate: 1.0 mL/min, 254 nm,  $t$  (major) = 13.32 min,  $t$  (minor)

= 18.42 min];  $^1\text{H NMR}$  (400 MHz,  $\text{CDCl}_3$ ):  $\delta$  (ppm) 7.82 (d,  $J = 7.4$  Hz, 2H), 7.46 (t,  $J = 7.6$  Hz, 1H), 7.34–7.26 (m, 8H), 7.28–7.18 (m, 2H), 7.11–7.01 (m, 6H), 6.98 (ddd,  $J = 7.9, 6.3, 1.3$  Hz, 1H), 6.93 (d,  $J = 8.1$  Hz, 1H), 6.87–6.75 (m, 5H), 6.09 (s, 1H), 5.52 (s, 2H), 4.98 (s, 1H), 4.05–3.97 (m, 2H), 3.81 (t,  $J = 6.9$  Hz, 2H), 2.42–2.23 (m, 12H), 1.89–1.81 (m, 2H);  $^{13}\text{C NMR}$  (100 MHz,  $\text{CDCl}_3$ ):  $\delta$  (ppm) 189.6, 165.4, 146.7, 146.5, 145.5, 144.5, 140.1, 136.34, 136.28, 134.4, 133.22, 133.18, 131.5, 129.6, 129.2, 129.1, 128.9, 128.7, 128.3, 128.0, 127.8, 127.5, 127.4, 126.3, 125.9, 124.7, 123.5, 122.9, 122.5, 122.2, 121.3, 121.1, 116.8, 115.81, 115.79, 110.8, 109.2, 68.7, 62.1, 56.3, 55.4, 53.5, 53.2, 53.1, 47.9, 45.3, 29.7, 24.2, 1.0; **HRMS** (ESI-TOF)  $m/z$ :  $[\text{M} + \text{H}]^+$  Calcd for  $\text{C}_{55}\text{H}_{49}\text{ClN}_5\text{O}_3\text{S}^+$  894.3240; Found 894.3237.

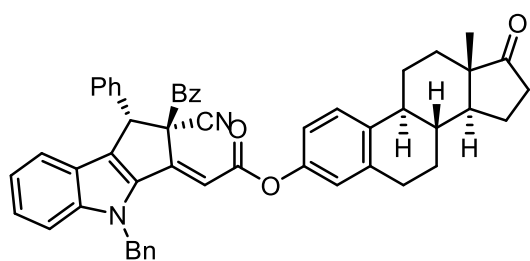

(**8R,9S,13S,14S**)-13-methyl-17-oxo-7,8,9,11,12,13,14,15,16,17-decahydro-6H-cyclopenta[*a*]phenanthren-3-yl (*E*)-2-((**1S,2R**)-2-benzoyl-4-benzyl-2-cyano-1-phenyl-1,4-dihydrocyclopenta[*b*]indol-3(**2H**)-ylidene)acetate

**(3ag)**: An oven-dried 10 mL Schlenk tube equipped with a magnetic stir bar was charged with 2-indolyl propiolate **1m** (52.7 mg, 0.0999 mmol, 1.0 equiv), enone **2a** (30.3 mg, 0.130 mmol, 1.3 equiv),  $\text{Pd}_2(\text{dba})_3$  (4.6 mg, 0.0050 mmol, 5 mol%), ligand **L1** (6.9 mg, 0.010 mmol, 10 mol%) and TBAB (6.4 mg, 0.020 mmol, 20 mol%). The tube was then evacuated and filled with argon. This cycle was repeated three times, and degassed 1,4-dioxane (0.5 mL) was added via syringe. The resulting solution was stirred at room temperature for 30 min, then at 60 °C for 72 h. After completion, the mixture was concentrated and purified by flash chromatography on silica gel (petroleum ether/EtOAc = 10/1–4/1) to give product **3ag**: 39.1 mg, as a yellow solid, 51% yield; 16:1 dr; >19:1 *E/Z*; mp 148–150 °C;  $[\alpha]_D^{25} = +2.6$  ( $c = 0.25$ , in  $\text{CHCl}_3$ ); determined by H-NMR analysis;  $^1\text{H NMR}$  (400 MHz,  $\text{CDCl}_3$ ):  $\delta$  (ppm) 7.88 (d,  $J = 7.2$  Hz, 2H), 7.54 (t,  $J = 7.4$  Hz, 1H), 7.45–7.31 (m, 11H), 7.24–7.20 (m, 3H), 7.20–7.11 (m, 2H), 7.07 (ddd,  $J = 8.0, 6.6, 1.2$  Hz, 1H), 6.69 (dd,  $J = 8.5, 2.6$  Hz, 1H), 6.65 (d,  $J = 2.5$  Hz, 1H), 6.35 (s, 1H), 5.65 (s, 2H), 5.07 (s, 1H), 2.81 (dd,  $J = 9.1, 4.3$  Hz, 2H), 2.48 (dd,  $J = 18.9, 8.6$  Hz, 1H), 2.39–2.29 (m, 1H), 2.24–1.84 (m, 6H), 1.64–1.54 (m, 3H), 1.44–1.34 (m, 2H), 0.87 (s, 3H);  $^{13}\text{C NMR}$  (100 MHz,  $\text{CDCl}_3$ ):  $\delta$  (ppm) 220.9, 189.2, 164.0, 148.0, 147.8, 145.7, 140.1, 137.7, 137.2, 136.3, 136.2, 134.1, 133.3, 132.2, 129.6, 129.3, 129.2, 128.9, 128.7, 128.3, 128.1, 126.6, 126.1, 126.0, 122.5, 121.5, 121.4, 121.2, 118.6, 116.6, 110.8, 108.6, 68.7, 53.5, 50.4, 48.0, 47.9, 44.1,

37.9, 35.8, 31.5, 29.3, 26.3, 25.6, 21.5, 13.8; **HRMS** (ESI-TOF)  $m/z$ :  $[M + Na]^+$  Calcd for  $C_{52}H_{44}N_2O_4Na^+$  783.3194; Found 783.3189.

## 9. General procedure for the asymmetric [3+2] annulations of 2-indolyl propiolate **1b** with enones **5**

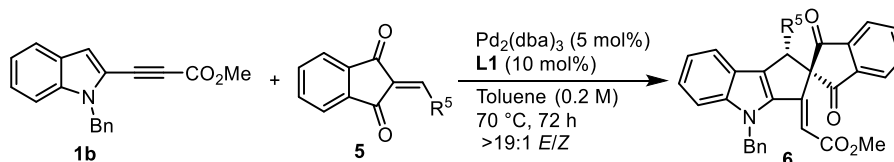

An oven-dried 10 mL Schlenk tube equipped with a magnetic stir bar was charged with 2-indolyl propiolate **1** (0.10 mmol, 1.0 equiv), enone **5** (0.12 mmol, 1.2 equiv),  $Pd_2(dba)_3$  (4.6 mg, 0.0050 mmol, 5 mol%) and ligand **L1** (6.8 mg, 0.010 mmol, 10 mol%). The tube was then evacuated and back-filled three times with argon, then degassed toluene (0.5 mL) was added via syringe. The resulting solution was stirred at room temperature for 30 min, then at 70 °C–90 °C for 72 h. After completion, the crude product was directly purified by flash chromatography on silica gel (EtOAc/petroleum ether) to give product **6**. Racemic **6** was obtained under the catalysis of  $Pd(PPh_3)_4$  (10 mol%) and MeCN (0.5 mL) as solvent.

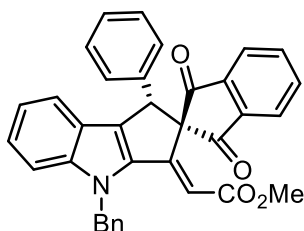

**Methyl (S,E)-2-(4-benzyl-1',3'-dioxo-1-phenyl-1,1',3',4-tetrahydro-3H-spiro[cyclopenta[b]indole-2,2'-inden]-3-ylidene)acetate (6a):** An oven-dried 10 mL Schlenk tube equipped with a magnetic stir bar was charged with 2-indolyl propiolate **1b** (28.9 mg, 0.0999 mmol, 1.0 equiv), enone **5a** (28.1 mg, 0.120 mmol, 1.2 equiv),  $Pd_2(dba)_3$  (4.6 mg, 0.0050 mmol, 5 mol%) and ligand **L1** (6.9 mg, 0.010 mmol, 10 mol%). The tube was then evacuated and filled with argon. This cycle was repeated three times, and degassed toluene (0.5 mL) was added via syringe. The resulting solution was stirred at room temperature for 30 min, then at 70 °C for 72 h. After completion, the crude product was directly purified by flash chromatography on silica gel (petroleum ether/EtOAc = 10/1–4/1) to give product **6a**: 42.3 mg, as a yellow solid, 81% yield; >19:1 *E/Z*; mp 213–215 °C;  $[\alpha]_D^{25} = +40.0$  ( $c = 0.25$ , in  $CHCl_3$ ); 90% ee, determined by HPLC analysis [Chiralpak column AD, *i*PrOH/*n*Hexane = 40/60, flow rate: 1.0 mL/min, 254 nm,  $t$  (minor) = 10.88 min,  $t$  (major) = 13.15 min];  **$^1H$  NMR** (400 MHz,  $CDCl_3$ ):  $\delta$  (ppm) 8.07 (d,  $J = 7.7$  Hz, 1H), 7.78 (td,  $J = 7.5, 1.1$  Hz, 1H), 7.62 (td,  $J = 7.5,$



1.1 Hz, 1H), 7.42–7.34 (m, 3H), 7.34–7.29 (m, 2H), 7.29–7.25 (m, 2H), 7.27–7.22 (m, 3H), 7.16–7.07 (m, 1H), 7.09–7.02 (m, 2H), 7.03–6.94 (m, 2H), 6.18 (s, 1H), 5.60 (s, 2H), 4.90 (s, 1H), 3.34 (s, 3H);  $^{13}\text{C}$  NMR (100 MHz,  $\text{CDCl}_3$ ):  $\delta$  (ppm) 197.3, 196.3, 166.6, 145.7, 145.0, 142.8, 142.5, 141.9, 136.6, 135.9, 134.9, 134.6, 132.5, 129.6, 129.1, 128.0, 127.8, 127.7, 126.1, 125.5, 123.1, 122.7, 122.6, 121.0, 120.7, 110.7, 107.5, 77.2, 54.7, 51.2, 48.0; **HRMS** (ESI-TOF)  $m/z$ :  $[\text{M} + \text{Na}]^+$  Calcd for  $\text{C}_{35}\text{H}_{25}\text{NO}_4\text{Na}^+$  546.1676; Found 546.1676.

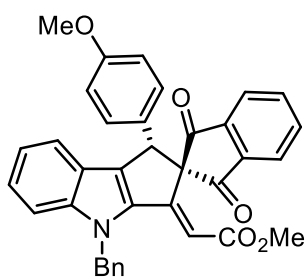

**Methyl (S,E)-2-(4-benzyl-1-(4-methoxyphenyl)-1',3'-dioxo-1,1',3',4-tetrahydro-3H-spiro[cyclopenta[b]indole-2,2'-inden]-3-ylidene)**

**acetate (6b)**: An oven-dried 10 mL Schlenk tube equipped with a magnetic stir bar was charged with 2-indolyl propiolate **1b** (28.9 mg, 0.0999 mmol, 1.0 equiv), enone **5b** (31.7 mg, 0.120 mmol, 1.2 equiv),  $\text{Pd}_2(\text{dba})_3$  (4.6 mg, 0.0050 mmol, 5 mol%) and ligand **L1** (6.9 mg, 0.010 mmol, 10 mol%). The tube was then evacuated and filled with argon. This cycle was repeated three times, and degassed toluene (0.5 mL) was added via syringe. The resulting solution was stirred at room temperature for 30 min, then at 80 °C for 72 h. After completion, the crude product was directly purified by flash chromatography on silica gel (petroleum ether/EtOAc = 10/1–4/1) to give product **6b**: 38.6 mg, as a yellow solid, 70% yield; >19:1 *E/Z*; mp 218–220 °C;  $[\alpha]_D^{25} = +90.4$  ( $c = 0.25$ , in  $\text{CHCl}_3$ ); 92% ee, determined by HPLC analysis [Chiralpak column ID, *i*PrOH/*n*Hexane = 40/60, flow rate: 1.0 mL/min, 254 nm,  $t$  (minor) = 19.31 min,  $t$  (major) = 27.07 min];  $^1\text{H}$  NMR (400 MHz,  $\text{CDCl}_3$ ):  $\delta$  (ppm) 8.06 (dd,  $J = 7.5$ , 1.0 Hz, 1H), 7.78 (td,  $J = 7.5$ , 1.1 Hz, 1H), 7.64 (td,  $J = 7.5$ , 1.1 Hz, 1H), 7.44–7.35 (m, 4H), 7.34–7.29 (m, 3H), 7.28–7.22 (m, 5H), 7.07 (dt,  $J = 8.0$ , 1.0 Hz, 1H), 6.98 (ddd,  $J = 8.0$ , 6.7, 1.1 Hz, 1H), 6.17 (s, 1H), 5.59 (s, 2H), 4.86 (s, 1H), 3.70 (s, 3H), 3.34 (s, 3H);  $^{13}\text{C}$  NMR (100 MHz,  $\text{CDCl}_3$ ):  $\delta$  (ppm) 197.4, 196.5, 166.7, 158.9, 145.8, 145.1, 142.6, 142.6, 141.9, 136.6, 134.9, 134.6, 132.9, 130.7, 129.1, 127.83, 127.75, 126.1, 125.5, 123.1, 122.8, 122.6, 121.0, 120.7, 113.1, 110.6, 107.5, 77.3, 55.1, 54.1, 51.2, 48.0; **HRMS** (ESI-TOF)  $m/z$ :  $[\text{M} + \text{Na}]^+$  Calcd for  $\text{C}_{36}\text{H}_{27}\text{NO}_5\text{Na}^+$  576.1782; Found 576.1791.

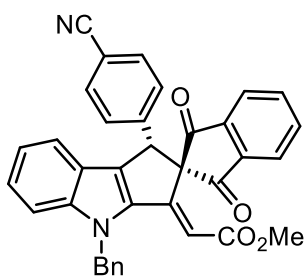

**Methyl (S,E)-2-(4-benzyl-1-(4-cyanophenyl)-1',3'-dioxo-1,1',3',4-tetrahydro-3H-spiro[cyclopenta[b]indole-2,2'-inden]-3-ylidene)**

**acetate (6c):** An oven-dried 10 mL Schlenk tube equipped with a magnetic stir bar was charged with 2-indolyl propiolate **1b** (28.9 mg, 0.0999 mmol, 1.0 equiv), enone **5c** (31.1 mg, 0.120 mmol, 1.2 equiv), Pd<sub>2</sub>(dba)<sub>3</sub> (4.6 mg, 0.0050 mmol, 5 mol%) and ligand **L1** (6.9 mg, 0.010 mmol, 10 mol%). The tube was then evacuated and filled with argon. This cycle was repeated three times, and degassed toluene (0.5 mL) was added via syringe. The resulting solution was stirred at room temperature for 30 min. then at 70 °C for 72 h. After completion, the crude product was directly purified by flash chromatography on silica gel (petroleum ether/EtOAc = 10/1–4/1) to give product **6c**: 51.1 mg, as a yellow solid, 93% yield; >19:1 *E/Z*; mp 151–152 °C; [α]<sup>25</sup><sub>D</sub> = +139.2 (*c* = 0.25, in CHCl<sub>3</sub>); 87% ee, determined by HPLC analysis [Chiralpak column ID, *i*PrOH/*n*Hexane = 40/60, flow rate: 1.0 mL/min, 254 nm, *t* (minor) = 23.66 min, *t* (major) = 29.42 min]; <sup>1</sup>H NMR (400 MHz, CDCl<sub>3</sub>): δ (ppm) 8.08 (dt, *J* = 7.6, 1.0 Hz, 1H), 7.83 (td, *J* = 7.5, 1.1 Hz, 1H), 7.69 (td, *J* = 7.5, 1.1 Hz, 1H), 7.44–7.38 (m, 3H), 7.38–7.32 (m, 4H), 7.32–7.26 (m, 2H), 7.25–7.20 (m, 2H), 7.06–6.93 (m, 3H), 6.20 (s, 1H), 5.60 (s, 2H), 4.91 (s, 1H), 3.35 (s, 3H); <sup>13</sup>C NMR (100 MHz, CDCl<sub>3</sub>): δ (ppm) 196.6, 195.9, 166.6, 145.0, 144.9, 143.0, 142.2, 142.0, 141.7, 136.3, 135.3, 135.1, 130.7, 130.3, 129.1, 127.9, 126.1, 125.8, 123.3, 122.8, 122.2, 121.1, 120.5, 118.5, 111.6, 110.9, 108.0, 76.8, 54.0, 51.4, 48.0; HRMS (ESI-TOF) *m/z*: [M + Na]<sup>+</sup> Calcd for C<sub>36</sub>H<sub>24</sub>N<sub>2</sub>O<sub>4</sub>Na<sup>+</sup> 571.1629; Found 571.1639.

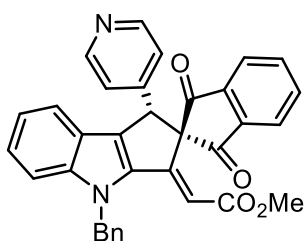

**Methyl (S,E)-2-(4-benzyl-1',3'-dioxo-1-(pyridin-4-yl)-1,1',3',4-tetrahydro-3H-spiro[cyclopenta[b]indole-2,2'-inden]-3-ylidene)**

**acetate (6d):** An oven-dried 10 mL Schlenk tube equipped with a magnetic stir bar was charged with 2-indolyl propiolate **1b** (28.9 mg, 0.0999 mmol, 1.0 equiv), enone **5d** (28.2 mg, 0.120 mmol, 1.2 equiv), Pd<sub>2</sub>(dba)<sub>3</sub> (4.6 mg, 0.0050 mmol, 5 mol%) and ligand **L1** (6.9 mg, 0.010 mmol, 10 mol%). The tube was then evacuated and filled with argon. This cycle was repeated three times, and degassed toluene (0.5 mL) was added via syringe. The resulting solution was stirred at room temperature for 30 min, then at 70 °C for 72 h. After completion, the crude product was directly purified by flash chromatography on silica gel (petroleum ether/EtOAc = 5/1–2/1) to give product **6d**: 45.8 mg, as a yellow solid, 87% yield; >19:1 *E/Z*; mp 95–96 °C; [α]<sup>25</sup><sub>D</sub> = +29.6 (*c* = 0.25, in CHCl<sub>3</sub>); 80% ee, determined by HPLC analysis

[Chiralpak column ID, *i*PrOH/*n*Hexane = 40/60, flow rate: 1.0 mL/min, 254 nm, *t* (minor) = 27.86 min, *t* (major) = 36.82 min]; **<sup>1</sup>H NMR** (400 MHz, CDCl<sub>3</sub>): δ (ppm) 8.35–8.24 (m, 2H), 8.09 (d, *J* = 7.6 Hz, 1H), 7.83 (td, *J* = 7.5, 1.1 Hz, 1H), 7.68 (td, *J* = 7.5, 1.1 Hz, 1H), 7.43 (d, *J* = 7.6 Hz, 1H), 7.42–7.38 (m, 1H), 7.36 (d, *J* = 4.8 Hz, 1H), 7.33 (d, *J* = 3.9 Hz, 1H), 7.32–7.26 (m, 2H), 7.25–7.21 (m, 2H), 7.05–6.99 (m, 2H), 6.79–6.56 (m, 2H), 6.20 (s, 1H), 5.60 (s, 2H), 4.83 (s, 1H), 3.35 (s, 3H); **<sup>13</sup>C NMR** (100 MHz, CDCl<sub>3</sub>): δ (ppm) 196.6, 195.8, 166.6, 149.4, 145.5, 145.0, 143.1, 142.3, 141.6, 136.4, 135.3, 135.1, 130.5, 129.1, 128.5, 127.9, 126.1, 125.8, 124.5, 123.3, 122.9, 122.2, 121.1, 120.5, 110.8, 107.9, 76.7, 53.3, 51.3, 48.0; **HRMS** (ESI-TOF) *m/z*: [M + Na]<sup>+</sup> Calcd for C<sub>34</sub>H<sub>24</sub>N<sub>2</sub>O<sub>4</sub>Na<sup>+</sup> 547.1629; Found 547.1627.

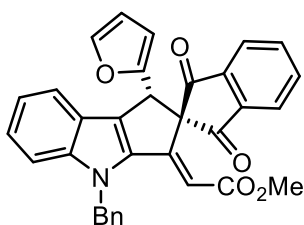

**Methyl (S,E)-2-(4-benzyl-1-(furan-2-yl)-1',3'-dioxo-1,1',3',4-tetrahydro-3H-spiro[cyclopenta[*b*]indole-2,2'-inden]-3-ylidene)**

**acetate (6e):** An oven-dried 10 mL Schlenk tube equipped with a magnetic stir bar was charged with 2-indolyl propiolate **1b** (28.9 mg, 0.0999 mmol, 1.0 equiv), enone **5e** (26.9 mg, 0.120 mmol, 1.2 equiv), Pd<sub>2</sub>(dba)<sub>3</sub> (4.6 mg, 0.0050 mmol, 5 mol%) and ligand **L1** (6.9 mg, 0.010 mmol, 10 mol%). The tube was then evacuated and filled with argon. This cycle was repeated three times, and degassed toluene (0.5 mL) was added via syringe. The resulting solution was stirred at room temperature for 30 min, then at 70 °C for 96 h. After completion, the crude product was directly purified by flash chromatography on silica gel (petroleum ether/EtOAc = 10/1–5/1) to give product **6e**: 29.2 mg, as a yellow solid, 57% yield; >19:1 *E/Z*; mp 108–109 °C; [α]<sub>D</sub><sup>25</sup> = –26.4 (*c* = 0.25, in CHCl<sub>3</sub>); 94% ee, determined by HPLC analysis [Chiralpak column IA, *i*PrOH/*n*Hexane = 20/80, flow rate: 1.0 mL/min, 254 nm, *t* (minor) = 31.31 min, *t* (major) = 47.23 min]; **<sup>1</sup>H NMR** (600 MHz, CDCl<sub>3</sub>): δ (ppm) 8.08 (d, *J* = 7.5 Hz, 1H), 7.83 (td, *J* = 7.5, 1.1 Hz, 1H), 7.75 (td, *J* = 7.5, 1.1 Hz, 1H), 7.65 (d, *J* = 7.5 Hz, 1H), 7.42–7.33 (m, 2H), 7.33–7.27 (m, 4H), 7.25–7.20 (m, 2H), 7.10–7.04 (m, 1H), 7.00 (d, *J* = 1.8 Hz, 1H), 6.17 (dd, *J* = 3.3, 1.9 Hz, 1H), 6.15 (s, 1H), 5.93 (d, *J* = 3.3 Hz, 1H), 5.57 (s, 2H), 5.01 (s, 1H), 3.34 (s, 3H); **<sup>13</sup>C NMR** (150 MHz, CDCl<sub>3</sub>): δ (ppm) 197.1, 195.8, 166.6, 149.9, 145.97, 145.96, 142.5, 142.3, 142.2, 141.8, 136.5, 134.9, 134.7, 129.6, 129.1, 127.8, 126.1, 125.6, 123.4, 122.7, 122.6, 120.9, 120.8, 110.7, 110.6, 110.1, 107.8, 75.9, 51.3, 48.1, 47.5; **HRMS** (ESI-TOF) *m/z*: [M + Na]<sup>+</sup> Calcd for C<sub>33</sub>H<sub>23</sub>NO<sub>5</sub>Na<sup>+</sup> 536.1469; Found 536.1469.

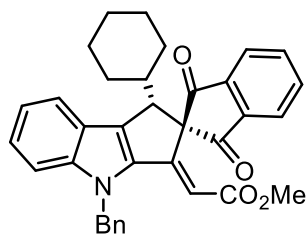

**Methyl (S,E)-2-(4-benzyl-1-cyclohexyl-1',3'-dioxo-1,1',3',4-tetrahydro-3H-spiro[cyclopenta[b]indole-2,2'-inden]-3-ylidene)**

**acetate (6f):** An oven-dried 10 mL Schlenk tube equipped with a magnetic stir bar was charged with 2-indolyl propiolate **1b** (28.9 mg, 0.0999 mmol, 1.0 equiv), enone **5f** (28.8 mg, 0.120 mmol, 1.2 equiv), Pd<sub>2</sub>(dba)<sub>3</sub> (4.6 mg, 0.0050 mmol, 5 mol%) and ligand **L1** (6.9 mg, 0.010 mmol, 10 mol%). The tube was then evacuated and filled with argon. This cycle was repeated three times, and degassed toluene (0.5 mL) was added via syringe. The resulting solution was stirred at room temperature for 30 min, then at 90 °C for 96 h. After completion, the crude product was directly purified by flash chromatography on silica gel (petroleum ether/EtOAc = 10/1–3/1) to give product **6f**: 16.3 mg, as a yellow solid, 31% yield; >19:1 *E/Z*; mp 110–112 °C; [α]<sub>D</sub><sup>25</sup> = +94.4 (*c* = 0.25, in CHCl<sub>3</sub>); 81% ee, determined by HPLC analysis [Chiralpak column IA, *i*PrOH/*n*Hexane = 20/80, flow rate: 1.0 mL/min, 254 nm, *t* (major) = 10.89 min, *t* (minor) = 13.21 min]; **<sup>1</sup>H NMR** (400 MHz, CDCl<sub>3</sub>): δ (ppm) 8.08 (d, *J* = 7.2 Hz, 1H), 8.02 (d, *J* = 7.2 Hz, 1H), 7.93–7.81 (m, 2H), 7.61 (d, *J* = 8.1 Hz, 1H), 7.38–7.30 (m, 2H), 7.30–7.22 (m, 3H), 7.18–7.09 (m, 3H), 6.07 (s, 1H), 5.55 (s, 2H), 3.42 (s, 1H), 3.33 (s, 3H), 1.73 (dd, *J* = 26.8, 13.1 Hz, 2H), 1.67–1.58 (m, 2H), 1.54–1.33 (m, 3H), 1.21–1.05 (m, 2H), 0.96 (ddd, *J* = 17.0, 8.5, 3.8 Hz, 1H), 0.44–0.30 (m, 1H); **<sup>13</sup>C NMR** (150 MHz, CDCl<sub>3</sub>): δ (ppm) 197.8, 195.4, 166.7, 145.7, 144.7, 142.91, 142.89, 140.6, 136.7, 135.4, 134.9, 132.3, 129.0, 127.7, 126.0, 125.1, 123.8, 123.7, 123.2, 122.2, 120.6, 110.6, 106.3, 75.1, 55.1, 51.1, 47.8, 41.1, 34.2, 28.7, 27.1, 26.1, 26.0; **HRMS** (ESI-TOF) *m/z*: [M + Na]<sup>+</sup> Calcd for C<sub>35</sub>H<sub>31</sub>NO<sub>4</sub>Na<sup>+</sup> 552.2146; Found 552.2155.

**10. General procedure for the asymmetric Friedel–Crafts reaction of 2-alkenyl indole **7** with imines **8****

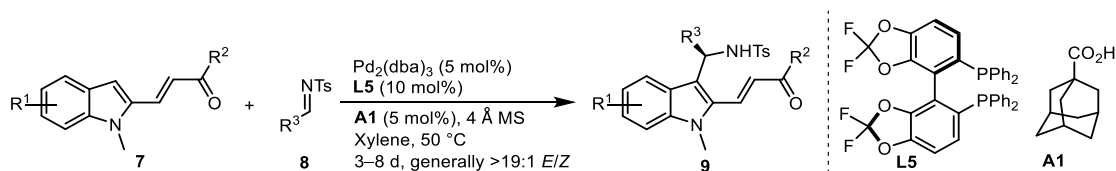

An oven-dried 10 mL test-tube equipped with a septum and a magnetic stir bar was charged with 2-alkenyl indole **7** (0.10 mmol, 1.0 equiv), *N*-sulfonylimine **8** (0.20 mmol, 2.0 equiv), Pd<sub>2</sub>(dba)<sub>3</sub> (4.6 mg, 0.0050 mmol, 5 mol%), ligand **L5** (6.8 mg, 0.010 mmol, 10 mol%), **A1** (0.9 mg, 0.005 mmol, 5 mol%) and 4 Å MS (40.0 mg). The tube was then evacuated and filled with argon. This cycle was repeated three times and xylene (1.0 mL) was added via syringe. The resulting solution was stirred at

room temperature for 30 min, then at 50 °C (monitored by TLC analysis). After completion, Et<sub>2</sub>O (3 mL) was added and the mixture was stirred 30 min at 0 °C. The precipitates were filtered, and washed with cold Et<sub>2</sub>O (3 × 3 mL). The cake was collected and dissolved in DCM. The mixture was filtered again, and washed with DCM (5 × 5 mL). The filtrate was concentrated to give pure product **9** (*The E-products 9 would be converted to the corresponding Z-isomers upon flash chromatography on silica gel, and a mixture of products was generally obtained*). Racemic **9** was obtained under the catalysis of Pd(PPh<sub>3</sub>)<sub>4</sub> (10 mol%) and using **A3** (30 mol%) as an acidic additive.

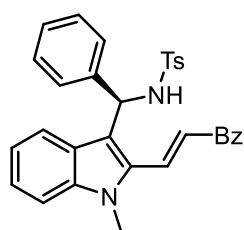

**(R,E)-4-methyl-N-((1-methyl-2-(3-oxo-3-phenylprop-1-en-1-yl)-1H-indol-3-yl)(phenyl)methyl)benzenesulfonamide (9a):** An oven-dried 10 mL

test-tube equipped with a septum and a magnetic stir bar was charged with 2-alkenyl indole **7a** (26.1 mg, 0.0999 mmol, 1.0 equiv), *N*-sulfonylimine **8a** (51.8 mg, 0.200 mmol, 2.0 equiv), Pd<sub>2</sub>(dba)<sub>3</sub> (4.6 mg, 0.0050 mmol, 5 mol%), ligand

**L5** (6.8 mg, 0.010 mmol, 10 mol%), **A1** (0.9 mg, 0.005 mmol, 5 mol%) and 4 Å MS (40.0 mg). The tube was then evacuated and filled with argon. This cycle was repeated three times and xylene (1.0 mL) was added via syringe. The resulting solution was stirred at room temperature for 30 min, then at 50 °C for 4 d. After completion, Et<sub>2</sub>O (3 mL) was added and the mixture was stirred 30 min at 0 °C. The precipitates were filtered, and washed with cold Et<sub>2</sub>O (3 × 3 mL). The cake was collected and dissolved in DCM. The mixture was filtered again and washed with DCM (5 × 5 mL). The filtrate was concentrated to give pure product **9a**: 44.6 mg, as a yellow solid, 86% yield; >19:1 *E/Z*; mp 203–205 °C; [α]<sub>D</sub><sup>25</sup> = -16.0 (*c* = 0.25, in CHCl<sub>3</sub>); 92% ee, determined by HPLC analysis [Chiralpak column AD, *i*PrOH/*n*Hexane = 40/60, flow rate: 1.0 mL/min, 254 nm, *t* (minor) = 16.31 min, *t* (major) = 28.02 min]; <sup>1</sup>H NMR (400 MHz, CDCl<sub>3</sub>): δ (ppm) 7.84 (d, *J* = 8.0 Hz, 2H), 7.73 (d, *J* = 15.6 Hz, 1H), 7.58 (t, *J* = 6.4 Hz, 1H), 7.49–7.38 (m, 4H), 7.35–7.26 (m, 6H), 7.24–7.18 (m, 2H), 7.23 (d, *J* = 15.6 Hz, 1H), 7.00 (t, *J* = 6.4 Hz, 1H), 6.83 (d, *J* = 8.0 Hz, 2H), 6.19 (d, *J* = 8.0 Hz, 1H), 5.39 (dd, *J* = 8.0, 2.5 Hz, 1H), 3.72 (s, 3H), 2.23 (s, 3H); <sup>13</sup>C NMR (100 MHz, CDCl<sub>3</sub>): δ (ppm) 188.7, 142.7, 140.0, 138.5, 137.6, 136.7, 133.1, 133.0, 131.2, 128.73, 128.72, 128.6, 128.5, 127.7, 127.2, 126.9, 125.8, 124.9, 124.2, 120.6, 120.3, 116.6, 109.7, 54.1, 30.6, 21.3.; HRMS (ESI-TOF) *m/z*: [M + Na]<sup>+</sup> Calcd for C<sub>32</sub>H<sub>28</sub>N<sub>2</sub>O<sub>3</sub>SNa<sup>+</sup> 543.1713; Found 543.1722.

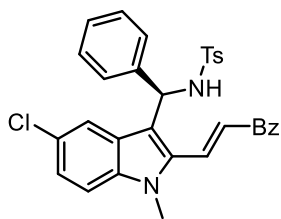

**(*R,E*)-*N*-((5-chloro-1-methyl-2-(3-oxo-3-phenylprop-1-en-1-yl)-1*H*-indol-3-yl)(phenyl)methyl)-4-methylbenzenesulfonamide (**9b**):**

An oven-dried 10 mL test-tube equipped with a septum and a magnetic stir bar was charged with 2-alkenyl indole **7b** (29.5 mg, 0.0997 mmol, 1.0 equiv), *N*-sulfonylimine **8a** (51.8 mg, 0.200 mmol, 2.0 equiv), Pd<sub>2</sub>(dba)<sub>3</sub> (4.6 mg, 0.0050 mmol, 5 mol%), ligand **L5** (6.8 mg, 0.010 mmol, 10 mol%), **A1** (0.9 mg, 0.005 mmol, 5 mol%) and 4 Å MS (40.0 mg). The tube was then evacuated and filled with argon. This cycle was repeated three times and xylene (1.0 mL) was added via syringe. The resulting solution was stirred at room temperature for 30 min, then at 50 °C for 7 d. After completion, Et<sub>2</sub>O (3 mL) was added and the mixture was stirred 30 min at 0 °C. The precipitates were filtered, and washed with cold Et<sub>2</sub>O (3 × 3 mL). The cake was collected and dissolved in DCM. The mixture was filtered again and washed with DCM (5 × 5 mL). The filtrate was concentrated to give pure product **9b**: 34.8 mg, as a yellow solid, 63% yield; >19:1 *E/Z*; mp 168–169 °C; [α]<sup>25</sup><sub>D</sub> = -12.8 (*c* = 0.25, in CHCl<sub>3</sub>); 98% ee, determined by HPLC analysis [Chiralpak column IC, *i*PrOH/*n*Hexane = 40/60, flow rate: 1.0 mL/min, 254 nm, *t* (major) = 12.28 min, *t* (minor) = 15.56 min]; <sup>1</sup>H NMR (400 MHz, CDCl<sub>3</sub>): δ (ppm) 7.84–7.79 (m, 2H), 7.75 (d, *J* = 15.6 Hz, 1H), 7.61–7.53 (m, 1H), 7.46 (t, *J* = 7.7 Hz, 2H), 7.41–7.34 (m, 2H), 7.37–7.27 (m, 5H), 7.28–7.26 (m, 2H), 7.25 (d, *J* = 15.6 Hz, 1H), 7.16 (dd, *J* = 8.8, 1.9 Hz, 1H), 7.11 (d, *J* = 8.8 Hz, 1H), 6.85 (d, *J* = 8.1 Hz, 1H), 6.15 (d, *J* = 7.0 Hz, 1H), 5.40 (d, *J* = 7.0 Hz, 1H), 3.71 (s, 3H), 2.22 (s, 3H); <sup>13</sup>C NMR (100 MHz, CDCl<sub>3</sub>): δ (ppm) 188.6, 142.9, 139.6, 137.4, 136.6, 136.5, 134.3, 133.2, 130.8, 128.9, 128.7, 128.6, 128.5, 128.0, 127.2, 126.9, 126.8, 126.1, 126.0, 124.3, 119.6, 115.5, 110.6, 54.1, 30.8, 21.3; HRMS (ESI-TOF) *m/z*: [M + Na]<sup>+</sup> Calcd for C<sub>32</sub>H<sub>27</sub>ClN<sub>2</sub>O<sub>3</sub>SNa<sup>+</sup> 577.1324 (<sup>35</sup>Cl); 578.1357 (<sup>37</sup>Cl); Found 577.1327 (<sup>35</sup>Cl); 578.1363 (<sup>37</sup>Cl).

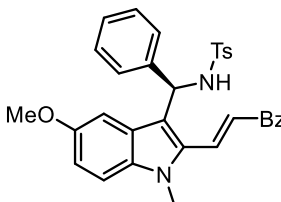

**(*R,E*)-*N*-((5-methoxy-1-methyl-2-(3-oxo-3-phenylprop-1-en-1-yl)-1*H*-indol-3-yl)(phenyl)methyl)-4-methylbenzenesulfonamide (**9c**):**

An oven-dried 10 mL test-tube equipped with a septum and a magnetic stir bar was charged with 2-alkenyl indole **7c** (29.1 mg, 0.0999 mmol, 1.0 equiv), *N*-sulfonylimine **8a** (51.8 mg, 0.200 mmol, 2.0 equiv), Pd<sub>2</sub>(dba)<sub>3</sub> (4.6 mg, 0.0050 mmol, 5 mol%), ligand **L5** (6.8 mg, 0.010 mmol, 10 mol%), **A1** (0.9 mg, 0.005 mmol, 5 mol%) and 4 Å MS (40.0 mg). The tube was then evacuated and filled with argon. This cycle was repeated three times and xylene (1.0 mL) was added via syringe. The resulting solution was stirred at room

temperature for 30 min, then at 50 °C for 7 d. After completion, Et<sub>2</sub>O (3 mL) was added and the mixture was stirred 30 min at 0 °C. The precipitates were filtered, and washed with cold Et<sub>2</sub>O (3 × 3 mL). The cake was collected and dissolved in DCM. The mixture was filtered again and washed with DCM (5 × 5 mL). The filtrate was concentrated to give pure product **9c**: 51.7 mg, as a yellow solid, 94% yield; >19:1 *E/Z*; mp 96–98 °C; [ $\alpha$ ]<sub>D</sub><sup>25</sup> = -12.8 (*c* = 0.25, in CHCl<sub>3</sub>); 91% ee, determined by HPLC analysis [Chiralpak column AD, *i*PrOH/*n*Hexane = 40/60, flow rate: 1.0 mL/min, 254 nm, *t* (major) = 19.33 min, *t* (minor) = 30.61 min]; **<sup>1</sup>H NMR** (400 MHz, CDCl<sub>3</sub>):  $\delta$  (ppm) 7.81 (d, *J* = 8.0 Hz, 2H), 7.73 (d, *J* = 15.6 Hz, 1H), 7.60–7.53 (m, 1H), 7.49–7.41 (m, 4H), 7.35–7.26 (m, 5H), 7.19 (d, *J* = 15.6 Hz, 1H), 7.08 (d, *J* = 9.0 Hz, 1H), 6.88 (dd, *J* = 9.0, 2.4 Hz, 1H), 6.82 (d, *J* = 8.0 Hz, 2H), 6.70 (d, *J* = 2.4 Hz, 1H), 6.19 (d, *J* = 7.8 Hz, 1H), 5.74 (d, *J* = 7.8 Hz, 1H), 3.69 (s, 3H), 3.68 (s, 3H), 2.21 (s, 3H); **<sup>13</sup>C NMR** (100 MHz, CDCl<sub>3</sub>):  $\delta$  (ppm) 188.8, 154.5, 142.8, 140.0, 137.7, 136.7, 134.1, 133.2, 133.1, 131.4, 128.8, 128.7, 128.6, 128.5, 127.7, 127.3, 126.9, 126.2, 124.2, 116.2, 115.3, 110.5, 101.0, 55.7, 54.0, 30.8, 21.4; **HRMS** (ESI-TOF) *m/z*: [*M* + Na]<sup>+</sup> Calcd for C<sub>33</sub>H<sub>30</sub>N<sub>2</sub>O<sub>4</sub>SNa<sup>+</sup> 573.1819; Found 573.1823.

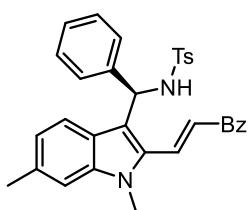

**(*R,E*)-*N*-((1,6-dimethyl-2-(3-oxo-3-phenylprop-1-en-1-yl)-1*H*-indol-3-yl)(phenyl)methyl)-4-methylbenzenesulfonamide (**9d**):** An oven-dried 10 mL

test-tube equipped with a septum and a magnetic stir bar was charged with 2-alkenyl indole **7d** (27.5 mg, 0.0999 mmol, 1.0 equiv), *N*-sulfonylimine **8a** (51.8 mg, 0.200 mmol, 2.0 equiv), Pd<sub>2</sub>(dba)<sub>3</sub> (4.6 mg, 0.0050 mmol, 5 mol%), ligand **L5** (6.8 mg, 0.010 mmol, 10 mol%), **A1** (0.9 mg, 0.005 mmol, 5 mol%) and 4 Å MS (40.0 mg). The tube was then evacuated and filled with argon. This cycle was repeated three times and xylene (1.0 mL) was added via syringe. The resulting solution was stirred at room temperature for 30 min, then at 50 °C for 7 d. After completion, Et<sub>2</sub>O (3 mL) was added and the mixture was stirred 30 min at 0 °C. The precipitates were filtered, and washed with cold Et<sub>2</sub>O (3 × 3 mL). The cake was collected and dissolved in DCM. The mixture was filtered again and washed with DCM (5 × 5 mL). The filtrate was concentrated to give pure product **9d**: 48.2 mg, as a yellow solid, 90% yield; >19:1 *E/Z*; mp 174–176 °C; [ $\alpha$ ]<sub>D</sub><sup>25</sup> = -11.2 (*c* = 0.25, in CHCl<sub>3</sub>); 94% ee, determined by HPLC analysis [Chiralpak column AD, *i*PrOH/*n*Hexane = 40/60, flow rate: 1.0 mL/min, 254 nm, *t* (minor) = 10.42 min, *t* (major) = 15.82 min]; **<sup>1</sup>H NMR** (400 MHz, CDCl<sub>3</sub>):  $\delta$  (ppm) 7.83 (d, *J* = 8.0 Hz, 2H), 7.72 (d, *J* = 15.6 Hz, 1H), 7.62–7.53 (m, 1H), 7.50–7.38 (m, 4H), 7.33–7.27 (m, 5H), 7.22–7.14 (m, 2H), 6.99 (s, 1H), 6.86–6.81 (m,

3H), 6.15 (d,  $J = 7.8$  Hz, 1H), 5.51 (d,  $J = 7.8$  Hz, 1H), 3.68 (s, 3H), 2.46 (s, 3H), 2.22 (s, 3H);  $^{13}\text{C}$  NMR (100 MHz,  $\text{CDCl}_3$ ):  $\delta$  (ppm) 188.7, 142.7, 140.0, 139.1, 137.7, 136.6, 134.6, 133.0, 132.4, 131.4, 128.7, 128.6, 128.5, 127.6, 127.2, 126.9, 123.9, 123.7, 122.5, 120.0, 117.0, 109.5, 54.0, 30.6, 22.0, 21.3; HRMS (ESI-TOF)  $m/z$ :  $[\text{M} + \text{Na}]^+$  Calcd for  $\text{C}_{33}\text{H}_{30}\text{N}_2\text{O}_3\text{SNa}^+$  557.1870; Found 557.1878.

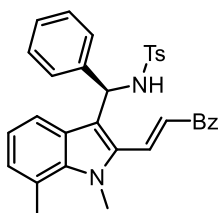

**(*R,E*)-*N*-((1,7-dimethyl-2-(3-oxo-3-phenylprop-1-en-1-yl)-1*H*-indol-3-yl)(phenyl)methyl)-4-methylbenzenesulfonamide (**9e**):** An oven-dried 10 mL

test-tube equipped with a septum and a magnetic stir bar was charged with 2-alkenyl indole **7e** (27.5 mg, 0.0999 mmol, 1.0 equiv), *N*-sulfonylimine **8a** (51.8 mg, 0.200 mmol, 2.0 equiv),  $\text{Pd}_2(\text{dba})_3$  (4.6 mg, 0.0050 mmol, 5 mol%), ligand **L5** (6.8 mg, 0.010 mmol, 10 mol%), **A1** (0.9 mg, 0.005 mmol, 5 mol%) and 4 Å MS (40.0 mg). The tube was then evacuated and filled with argon. This cycle was repeated three times and xylene (1.0 mL) was added via syringe. The resulting solution was stirred at room temperature for 30 min, then at 50 °C for 7 d. After completion,  $\text{Et}_2\text{O}$  (3 mL) was added and the mixture was stirred 30 min at 0 °C. The precipitates were filtered, and washed with cold  $\text{Et}_2\text{O}$  (3 × 3 mL). The cake was collected and dissolved in DCM. The mixture was filtered again and washed with DCM (5 × 5 mL). The filtrate was concentrated to give pure product **9e**: 41.6 mg, as a yellow solid, 78% yield; >19:1 *E/Z*; mp 179–180 °C;  $[\alpha]_D^{25} = -6.4$  ( $c = 0.25$ , in  $\text{CHCl}_3$ ); 97% ee, determined by HPLC analysis [Chiralpak column AD, *i*PrOH/*n*Hexane = 40/60, flow rate: 1.0 mL/min, 254 nm,  $t$  (minor) = 13.19 min,  $t$  (major) = 15.37 min];  $^1\text{H}$  NMR (400 MHz,  $\text{CDCl}_3$ ):  $\delta$  (ppm) 7.84 (d,  $J = 7.7$  Hz, 2H), 7.68 (d,  $J = 15.6$  Hz, 1H), 7.57 (t,  $J = 7.4$  Hz, 1H), 7.36–7.51 (m, 4H), 7.34–7.24 (m, 5H), 7.20–7.09 (m, 2H), 6.92 (d,  $J = 7.1$  Hz, 1H), 6.89–6.80 (m, 3H), 6.14 (d,  $J = 8.0$  Hz, 1H), 5.53 (d,  $J = 8.0$  Hz, 1H), 3.91 (s, 3H), 2.72 (s, 3H), 2.24 (s, 3H);  $^{13}\text{C}$  NMR (100 MHz,  $\text{CDCl}_3$ ):  $\delta$  (ppm) 188.7, 142.7, 140.1, 137.9, 137.6, 136.7, 134.4, 133.2, 131.6, 128.8, 128.7, 128.59, 128.58, 127.7, 127.23, 127.18, 126.9, 126.5, 125.6, 121.5, 120.7, 118.4, 116.5, 54.0, 33.9, 21.4, 20.6; HRMS (ESI-TOF)  $m/z$ :  $[\text{M} + \text{Na}]^+$  Calcd for  $\text{C}_{33}\text{H}_{30}\text{N}_2\text{O}_3\text{SNa}^+$  557.1870; Found 557.1875.



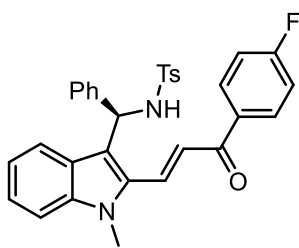

**(*R,E*)-*N*-((2-(3-(4-fluorophenyl)-3-oxoprop-1-en-1-yl)-1-methyl-1*H*-indol-3-yl)(phenyl)methyl)-4-methylbenzenesulfonamide (**9f**):** An oven-dried 10 mL test-tube equipped with a septum and a magnetic stir bar was charged with 2-alkenyl indole **7f** (27.9 mg, 0.0999 mmol, 1.0 equiv), *N*-sulfonylimine **8a** (51.8 mg, 0.200 mmol, 2.0 equiv), Pd<sub>2</sub>(dba)<sub>3</sub> (4.6 mg, 0.0050 mmol, 5 mol%), ligand **L5** (6.8 mg, 0.010 mmol, 10 mol%), **A1** (0.9 mg, 0.005 mmol, 5 mol%) and 4 Å MS (40.0 mg). The tube was then evacuated and filled with argon. This cycle was repeated three times and xylene (1.0 mL) was added via syringe. The resulting solution was stirred at room temperature for 30 min, then at 50 °C for 7 d. After completion, Et<sub>2</sub>O (3 mL) was added and the mixture was stirred 30 min at 0 °C. The precipitates were filtered, and washed with cold Et<sub>2</sub>O (3 × 3 mL). The cake was collected and dissolved in DCM. The mixture was filtered again and washed with DCM (5 × 5 mL). The filtrate was concentrated to give pure product **9f**: 46.8 mg, as a yellow solid, 87% yield; >19:1 *E/Z*; mp 149–150 °C; [α]<sup>25</sup><sub>D</sub> = -36.0 (*c* = 0.25, in CHCl<sub>3</sub>); 98% ee, determined by HPLC analysis [Chiralpak column AD, *i*PrOH/*n*Hexane = 40/60, flow rate: 1.0 mL/min, 254 nm, *t* (minor) = 14.13 min, *t* (major) = 25.79 min]; <sup>1</sup>H NMR (400 MHz, CDCl<sub>3</sub>): δ (ppm) 7.86 (dd, *J* = 8.8, 5.6 Hz, 2H), 7.75 (d, *J* = 15.6 Hz, 1H), 7.41 (d, *J* = 6.4 Hz, 2H), 7.35–7.27 (m, 6H), 7.24–7.18 (m, 3H), 7.12 (t, *J* = 8.6 Hz, 2H), 6.99 (t, *J* = 7.4 Hz, 1H), 6.82 (d, *J* = 8.0 Hz, 2H), 6.21 (d, *J* = 8.0 Hz, 1H), 5.50 (d, *J* = 8.0 Hz, 1H), 3.71 (s, 3H), 2.23 (s, 3H); <sup>13</sup>C NMR (100 MHz, CDCl<sub>3</sub>): δ (ppm) 187.1, 165.7 (d, *J* = 253.7 Hz), 142.7, 139.9, 138.4, 136.6, 133.9 (d, *J* = 3.0 Hz), 132.9, 131.3 (d, *J* = 21.6 Hz), 131.1, 128.7, 128.6, 127.7, 127.2, 126.8, 125.8, 124.5, 124.2, 120.6, 120.3, 116.5, 115.8 (d, *J* = 21.7 Hz), 109.7, 54.1, 30.5, 21.3; <sup>19</sup>F NMR (376 MHz, CDCl<sub>3</sub>) δ (ppm) -104.83; HRMS (ESI-TOF) *m/z*: [M + Na]<sup>+</sup> Calcd for C<sub>32</sub>H<sub>27</sub>FN<sub>2</sub>O<sub>3</sub>SNa<sup>+</sup> 561.1619; Found 561.1626.

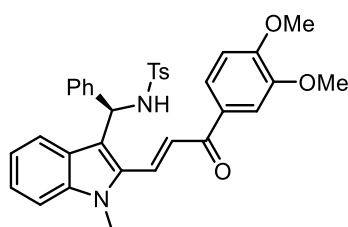

**(*R,E*)-*N*-((2-(3-(3,4-dimethoxyphenyl)-3-oxoprop-1-en-1-yl)-1-methyl-1*H*-indol-3-yl)(phenyl)methyl)-4-methylbenzenesulfonamide (**9g**):** An oven-dried 10 mL test-tube equipped with a septum and a magnetic stir bar was charged with 2-alkenyl indole **7g** (32.1 mg, 0.0999 mmol, 1.0 equiv), *N*-sulfonylimine **8a** (51.8 mg, 0.200 mmol, 2.0 equiv), Pd<sub>2</sub>(dba)<sub>3</sub> (4.6 mg, 0.0050 mmol, 5 mol%), ligand **L5** (6.8 mg, 0.010 mmol, 10 mol%), **A1** (0.9 mg, 0.005 mmol, 5 mol%) and 4 Å MS (40.0 mg). The tube was then evacuated and filled with argon. This cycle was repeated three times and xylene (1.0 mL) was added via syringe.

The resulting solution was stirred at room temperature for 30 min, then at 50 °C for 5 d. After completion, Et<sub>2</sub>O (3 mL) was added and the mixture was stirred 30 min at 0 °C. The precipitates were filtered, and washed with cold Et<sub>2</sub>O (3 × 3 mL). The cake was collected and dissolved in DCM. The mixture was filtered again and washed with DCM (5 × 5 mL). The filtrate was concentrated to give pure product **9g**: 54.2 mg, as a yellow solid, 93% yield; >19:1 *E/Z*; mp 201–202 °C; [ $\alpha$ ]<sub>D</sub><sup>25</sup> = –25.6 (*c* = 0.25, in CHCl<sub>3</sub>); 93% ee, determined by HPLC analysis [Chiralpak column AD, *i*PrOH/*n*Hexane = 40/60, flow rate: 1.0 mL/min, 254 nm, *t* (minor) = 19.41 min, *t* (major) = 28.93 min]; **<sup>1</sup>H NMR** (400 MHz, CDCl<sub>3</sub>):  $\delta$  (ppm) 7.72 (d, *J* = 15.6 Hz, 1H), 7.56 (d, *J* = 2.0 Hz, 1H), 7.49–7.39 (m, 3H), 7.34 (d, *J* = 15.6 Hz, 1H), 7.32–7.25 (m, 6H), 7.23–7.15 (m, 2H), 6.96 (t, *J* = 7.4 Hz, 1H), 6.88 (d, *J* = 8.4 Hz, 1H), 6.81 (d, *J* = 8.0 Hz, 2H), 6.24 (d, *J* = 8.0 Hz, 1H), 5.63 – 5.55 (m, 1H), 3.95 (s, 3H), 3.90 (s, 3H), 3.69 (s, 3H), 2.23 (s, 3H); **<sup>13</sup>C NMR** (150 MHz, CDCl<sub>3</sub>):  $\delta$  (ppm) 186.9, 153.5, 149.2, 142.6, 140.0, 138.3, 136.7, 133.4, 130.7, 130.5, 128.6, 128.5, 127.6, 127.2, 126.7, 125.6, 125.1, 123.9, 123.2, 120.4, 120.1, 115.7, 110.7, 110.2, 109.6, 56.1, 56.0, 54.1, 30.4, 21.3; **HRMS** (ESI-TOF) *m/z*: [M + Na]<sup>+</sup> Calcd for C<sub>34</sub>H<sub>32</sub>N<sub>2</sub>O<sub>5</sub>SNa<sup>+</sup> 603.1925; Found 603.1931.

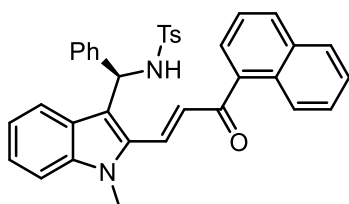

**(*R,E*)-4-methyl-*N*-((1-methyl-2-(3-(naphthalen-1-yl)-3-oxoprop-1-en-1-yl)-1*H*-indol-3-yl)(phenyl)methyl)benzenesulfonamide (**9h**):**

An oven-dried 10 mL test-tube equipped with a septum and a magnetic stir bar was charged with 2-alkenyl indole **7h** (31.1 mg, 0.0999 mmol, 1.0 equiv), *N*-sulfonylimine **8a** (51.8 mg, 0.200 mmol, 2.0 equiv), Pd<sub>2</sub>(dba)<sub>3</sub> (4.6 mg, 0.0050 mmol, 5 mol%), ligand **L5** (6.8 mg, 0.010 mmol, 10 mol%), **A1** (0.9 mg, 0.005 mmol, 5 mol%) and 4 Å MS (40.0 mg). The tube was then evacuated and filled with argon. This cycle was repeated three times and xylene (1.0 mL) was added via syringe. The resulting solution was stirred at room temperature for 30 min, then at 50 °C for 7 d. After completion, Et<sub>2</sub>O (3 mL) was added and the mixture was stirred 30 min at 0 °C. The precipitates were filtered, and washed with cold Et<sub>2</sub>O (3 × 3 mL). The cake was collected and dissolved in DCM. The mixture was filtered again and washed with DCM (5 × 5 mL). The filtrate was concentrated to give pure product **9h**: 38.4 mg, as a yellow solid, 67% yield; >19:1 *E/Z*; mp 86–87 °C; [ $\alpha$ ]<sub>D</sub><sup>25</sup> = +16.0 (*c* = 0.25, in CHCl<sub>3</sub>); 91% ee, determined by HPLC analysis [Chiralpak column AD, *i*PrOH/*n*Hexane = 40/60, flow rate: 1.0 mL/min, 254 nm, *t* (minor) = 23.38 min, *t* (major) = 32.11 min]; **<sup>1</sup>H NMR** (400 MHz, CDCl<sub>3</sub>):  $\delta$  (ppm) 8.45 (d, *J* = 8.0 Hz, 1H), 8.01 (d, *J* = 8.2 Hz, 1H), 7.92 (d, *J* = 7.4 Hz, 1H), 7.69 (d, *J* = 7.2 Hz, 1H), 7.64–7.47 (m, 4H), 7.35–

7.22 (m, 7H), 7.22–7.17 (m, 3H), 7.02–6.91 (m, 2H), 6.81 (d,  $J = 8.0$  Hz, 2H), 6.11 (d,  $J = 7.6$  Hz, 1H), 5.38 (d,  $J = 7.6$  Hz, 1H), 3.69 (s, 3H), 2.21 (s, 3H);  $^{13}\text{C NMR}$  (100 MHz,  $\text{CDCl}_3$ ):  $\delta$  (ppm) 193.6, 142.7, 139.7, 138.8, 136.7, 136.3, 133.9, 132.7, 132.3, 132.0, 130.5, 129.0, 128.6, 128.5, 127.8, 127.7, 127.6, 127.1, 126.8, 126.6, 125.6, 125.5, 124.6, 124.4, 120.6, 120.3, 117.4, 109.7, 53.9, 30.9, 21.3; **HRMS** (ESI-TOF)  $m/z$ :  $[\text{M} + \text{Na}]^+$  Calcd for  $\text{C}_{36}\text{H}_{30}\text{N}_2\text{O}_3\text{SNa}^+$  593.1870; Found 593.1874.

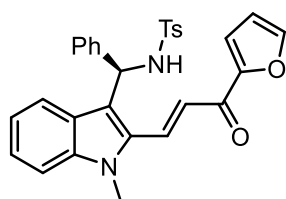

**(*R,E*)-*N*-((2-(3-(furan-2-yl)-3-oxoprop-1-en-1-yl)-1-methyl-1*H*-indol-3-yl)(phenyl)methyl)-4-methylbenzenesulfonamide (**9i**):** An oven-

dried 10 mL test-tube equipped with a septum and a magnetic stir bar was charged with 2-alkenyl indole **7i** (25.1 mg, 0.0999 mmol, 1.0 equiv), *N*-sulfonylimine **8a** (51.8 mg, 0.200 mmol, 2.0 equiv),  $\text{Pd}_2(\text{dba})_3$  (4.6 mg, 0.0050 mmol, 5 mol%), ligand **L5** (6.8 mg, 0.010 mmol, 10 mol%), **A1** (0.9 mg, 0.005 mmol, 5 mol%) and 4 Å MS (40.0 mg). The tube was then evacuated and filled with argon. This cycle was repeated three times and xylene (1.0 mL) was added via syringe. The resulting solution was stirred at room temperature for 30 min, then at 50 °C for 5 d. After completion,  $\text{Et}_2\text{O}$  (3 mL) was added and the mixture was stirred 30 min at 0 °C. The precipitates were filtered, and washed with cold  $\text{Et}_2\text{O}$  (3 × 3 mL). The cake was collected and dissolved in DCM. The mixture was filtered again and washed with DCM (5 × 5 mL). The filtrate was concentrated to give pure product **9i**: 45.5 mg, as a yellow solid, 89% yield; >19:1 *E/Z*; mp 189–191 °C;  $[\alpha]_{\text{D}}^{25} = -41.6$  ( $c = 0.25$ , in  $\text{CHCl}_3$ ); 97% ee, determined by HPLC analysis [Chiralpak column AD, *i*PrOH/*n*Hexane = 40/60, flow rate: 1.0 mL/min, 254 nm,  $t$  (minor) = 13.63 min,  $t$  (major) = 25.66 min];  $^1\text{H NMR}$  (400 MHz,  $\text{CDCl}_3$ ):  $\delta$  (ppm) 7.73 (d,  $J = 15.8$  Hz, 1H), 7.62 (s, 1H), 7.42 (d,  $J = 7.3$  Hz, 2H), 7.35–7.21 (m, 6H), 7.23–7.15 (m, 3H), 7.13 (d,  $J = 15.8$  Hz, 1H), 6.97 (t,  $J = 7.2$  Hz, 1H), 6.84 (d,  $J = 8.0$  Hz, 2H), 6.60–6.54 (m, 1H), 6.18 (d,  $J = 8.0$  Hz, 1H), 5.54 (d,  $J = 8.0$  Hz, 1H), 3.70 (s, 3H), 2.23 (s, 3H);  $^{13}\text{C NMR}$  (100 MHz,  $\text{CDCl}_3$ ):  $\delta$  (ppm) 176.5, 153.3, 147.0, 142.7, 139.9, 138.6, 136.6, 132.8, 130.3, 128.6, 127.6, 127.1, 126.8, 125.5, 124.3, 124.2, 120.5, 120.3, 118.3, 116.9, 112.6, 109.6, 54.0, 30.6, 21.3; **HRMS** (ESI-TOF)  $m/z$ :  $[\text{M} + \text{Na}]^+$  Calcd for  $\text{C}_{30}\text{H}_{26}\text{N}_2\text{O}_4\text{SNa}^+$  533.1506; Found 533.1512.

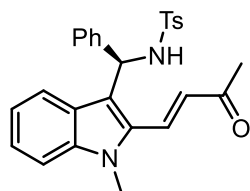

**(*R,E*)-4-methyl-*N*-((1-methyl-2-(3-oxobut-1-en-1-yl)-1*H*-indol-3-yl)(phenyl)methyl)benzenesulfonamide (**9j**):** An oven-dried 10 mL test-tube equipped with a septum and a magnetic stir bar was charged with 2-alkenyl indole **7j** (19.9 mg, 0.0999 mmol, 1.0 equiv), *N*-sulfonylimine **8a** (51.8 mg,

0.200 mmol, 2.0 equiv), Pd<sub>2</sub>(dba)<sub>3</sub> (4.6 mg, 0.0050 mmol, 5 mol%), ligand **L5** (6.8 mg, 0.010 mmol, 10 mol%), **A1** (0.9 mg, 0.005 mmol, 5 mol%) and 4 Å MS (40.0 mg). The tube was then evacuated and filled with argon. This cycle was repeated three times and xylene (1.0 mL) was added via syringe. The resulting solution was stirred at room temperature for 30 min, then at 50 °C for 7 d. After completion, purification by flash chromatography on silica gel (petroleum ether/EtOAc = 10/1–6/1) to give product **9j**: 38.9 mg, as a yellow solid, 85% yield; *E/Z* = 16:1; mp 117–118 °C; [ $\alpha$ ]<sub>D</sub><sup>25</sup> = –20.8 (*c* = 0.25, in CHCl<sub>3</sub>); 90% ee, determined by HPLC analysis [Chiralpak column AD, *i*PrOH/*n*Hexane = 40/60, flow rate: 1.0 mL/min, 254 nm, *t* (minor) = 10.39 min, *t* (major) = 16.48 min]; **<sup>1</sup>H NMR** (400 MHz, CDCl<sub>3</sub>):  $\delta$  (ppm) 7.43 (d, *J* = 16.4 Hz, 1H), 7.39 (d, *J* = 7.4 Hz, 2H), 7.32 (d, *J* = 8.0 Hz, 2H), 7.30–7.22 (m, 4H), 7.20 (t, *J* = 7.4 Hz, 2H), 6.96 (t, *J* = 7.2 Hz, 1H), 6.91 (d, *J* = 7.9 Hz, 2H), 6.36 (d, *J* = 16.4 Hz, 1H), 6.07 (d, *J* = 7.7 Hz, 1H), 5.44 (d, *J* = 7.7 Hz, 1H), 3.67 (s, 3H), 2.30 (s, 3H), 2.29 (s, 3H); **<sup>13</sup>C NMR** (150 MHz, CDCl<sub>3</sub>):  $\delta$  (ppm) 197.3, 142.8, 139.7, 139.0, 136.8, 132.4, 130.1, 129.2, 128.7, 128.6, 127.7, 127.1, 126.8, 125.2, 124.3, 120.6, 120.3, 117.3, 109.7, 53.7, 31.1, 28.0, 21.4; **HRMS** (ESI-TOF) *m/z*: [M + Na]<sup>+</sup> Calcd for C<sub>27</sub>H<sub>26</sub>N<sub>2</sub>O<sub>3</sub>SNa<sup>+</sup> 481.1557; Found 481.1565.

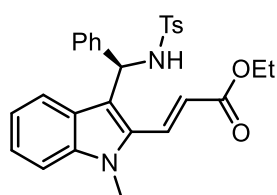

**(*R,E*)-ethyl-3-(1-methyl-3-(((4-methylphenyl)sulfonamido)(phenyl)methyl)-1*H*-indol-2-yl)acrylate (**9k**):** An oven-dried 10 mL test-tube equipped with a septum and a magnetic stir bar was charged with 2-alkenyl indole **7k** (22.9 mg, 0.0999 mmol, 1.0 equiv), *N*-sulfonylimine **8a** (51.8 mg,

0.200 mmol, 2.0 equiv), Pd<sub>2</sub>(dba)<sub>3</sub> (4.6 mg, 0.0050 mmol, 5 mol%), ligand **L5** (6.8 mg, 0.010 mmol, 10 mol%), **A1** (0.9 mg, 0.005 mmol, 5 mol%) and 4 Å MS (40.0 mg). The tube was then evacuated and filled with argon. This cycle was repeated three times and xylene (1.0 mL) was added via syringe. The resulting solution was stirred at room temperature for 30 min, then at 50 °C for 7 d. After completion, purification by flash chromatography on silica gel (petroleum ether/EtOAc = 10/1–6/1) to give product **9k**: 32.7 mg, as a yellow solid, 67% yield; *E/Z* = 10:1; mp 141–142 °C; [ $\alpha$ ]<sub>D</sub><sup>25</sup> = +24.8 (*c* = 0.25, in CHCl<sub>3</sub>); 76% ee, determined by HPLC analysis [Chiralpak column AD, *i*PrOH/*n*Hexane = 40/60, flow rate: 1.0 mL/min, 254 nm, *t* (minor) = 7.39 min, *t* (major) = 18.63 min]; **<sup>1</sup>H NMR** (400

MHz, CDCl<sub>3</sub>):  $\delta$  (ppm) 7.51 (d,  $J = 16.2$  Hz, 1H), 7.44–7.38 (m, 2H), 7.32–7.18 (m, 8H), 6.96 (ddd,  $J = 7.9, 6.7, 1.3$  Hz, 1H), 6.89 (d,  $J = 7.9$  Hz, 2H), 6.06–5.99 (m, 2H), 5.41 (d,  $J = 7.8$  Hz, 1H), 4.27 (q,  $J = 7.1$  Hz, 2H), 3.65 (s, 3H), 2.29 (s, 3H), 1.35 (t,  $J = 7.1$  Hz, 3H); <sup>13</sup>C NMR (100 MHz, CDCl<sub>3</sub>):  $\delta$  (ppm) 166.2, 142.7, 139.8, 138.6, 136.6, 132.4, 131.5, 128.6, 128.5, 127.6, 127.1, 126.9, 125.0, 124.0, 121.4, 120.4, 120.2, 116.4, 109.7, 60.8, 53.7, 30.9, 21.4, 14.3; HRMS (ESI-TOF)  $m/z$ : [M + Na]<sup>+</sup> Calcd for C<sub>28</sub>H<sub>28</sub>N<sub>2</sub>O<sub>4</sub>SNa<sup>+</sup> 511.1662; Found 511.1660.

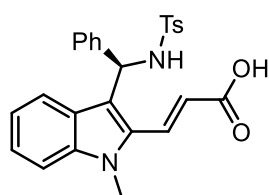

**(*R,E*)-3-(1-methyl-3-(((4-methylphenyl)sulfonamido)(phenyl)methyl)-1H-indol-2-yl)acrylic acid (9l)**: An oven-dried 10 mL test-tube equipped with a septum and a magnetic stir bar was charged with 2-alkenyl indole **7l** (20.1 mg, 0.0999 mmol, 1.0 equiv), *N*-sulfonylimine **8a** (51.8 mg, 0.200

mmol, 2.0 equiv), Pd<sub>2</sub>(dba)<sub>3</sub> (4.6 mg, 0.0050 mmol, 5 mol%), ligand **L5** (6.8 mg, 0.010 mmol, 10 mol%), **A1** (0.9 mg, 0.005 mmol, 5 mol%) and 4 Å MS (40.0 mg). The tube was then evacuated and filled with argon. This cycle was repeated three times and xylene (1.0 mL) was added via syringe. The resulting solution was stirred at room temperature for 30 min, then at 50 °C for 5 d. After completion, purification by flash chromatography on silica gel (petroleum ether/DCM/EtOAc = 20/5/1) to give product **9l**: 31.3 mg, as a faint yellow solid, 68% yield; *E/Z* = 9:1; mp 180–182 °C; [ $\alpha$ ]<sub>D</sub><sup>25</sup> = +20.0 ( $c = 0.1$ , in CHCl<sub>3</sub>); 62% ee, determined by HPLC analysis [Chiralpak column IC, *i*PrOH/*n*Hexane = 40/60, flow rate: 1.0 mL/min, 254 nm,  $t$  (minor) = 10.39 min,  $t$  (major) = 14.62 min]; <sup>1</sup>H NMR (400 MHz, CDCl<sub>3</sub>):  $\delta$  (ppm) 7.64 (d,  $J = 16.1$  Hz, 1H), 7.40 (d,  $J = 7.3$  Hz, 2H), 7.37–7.33 (m, 2H), 7.31–7.25 (m, 4H), 7.22 (d,  $J = 7.9$  Hz, 2H), 6.98 (t,  $J = 7.3$  Hz, 1H), 6.93 (d,  $J = 7.9$  Hz, 2H), 6.09–5.99 (m, 2H), 5.53 (d,  $J = 7.6$  Hz, 1H), 3.69 (s, 3H), 2.30 (s, 3H); <sup>13</sup>C NMR (150 MHz, CDCl<sub>3</sub>):  $\delta$  (ppm) 170.9, 142.9, 139.7, 139.1, 136.6, 133.6, 131.9, 128.8, 128.6, 127.7, 127.1, 127.0, 125.0, 124.5, 120.6, 120.5, 119.6, 117.8, 109.8, 53.7, 31.2, 21.4; HRMS (ESI-TOF)  $m/z$ : [M + Na]<sup>+</sup> Calcd for C<sub>26</sub>H<sub>24</sub>N<sub>2</sub>O<sub>4</sub>SNa<sup>+</sup> 483,1349; Found 483,1358.

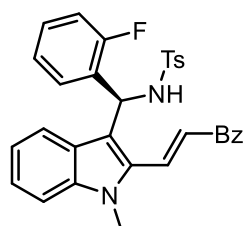

**(*R,E*)-*N*-((2-fluorophenyl)(1-methyl-2-(3-oxo-3-phenylprop-1-en-1-yl)-1H-indol-3-yl)methyl)-4-methylbenzenesulfonamide (9m)**: An oven-dried 10 mL test-tube equipped with a septum and a magnetic stir bar was charged with 2-alkenyl indole **7a** (26.1 mg, 0.0999 mmol, 1.0 equiv), *N*-sulfonylimine **8b** (55.5 mg, 0.200 mmol, 2.0 equiv), Pd<sub>2</sub>(dba)<sub>3</sub> (4.6 mg, 0.0050 mmol, 5

mol%), ligand **L5** (6.8 mg, 0.010 mmol, 10 mol%), **A1** (0.9 mg, 0.005 mmol, 5 mol%) and 4 Å MS (40.0 mg). The tube was then evacuated and filled with argon. This cycle was repeated three times and xylene (1.0 mL) was added via syringe. The resulting solution was stirred at room temperature for 30 min, then at 50 °C for 5 d. After completion, Et<sub>2</sub>O (3 mL) was added and the mixture was stirred 30 min at 0 °C. The precipitates were filtered, and washed with cold Et<sub>2</sub>O (3 × 3 mL). The cake was collected and dissolved in DCM. The mixture was filtered again, and washed with DCM (5 × 5 mL). The filtrate was concentrated to give pure product **9m**: 49.5 mg, as a yellow solid, 92% yield; >19:1 *E/Z*; mp 85–87 °C; [ $\alpha$ ]<sub>D</sub><sup>25</sup> = +151.2 (*c* = 0.25, in CHCl<sub>3</sub>); 92% ee, determined by HPLC analysis [Chiralpak column AD, *i*PrOH/*n*Hexane = 40/60, flow rate: 1.0 mL/min, 254 nm, *t* (minor) = 21.47 min, *t* (major) = 25.57 min]; <sup>1</sup>H NMR (400 MHz, CDCl<sub>3</sub>): δ (ppm) 8.00 (d, *J* = 7.6 Hz, 2H), 7.76–7.71 (m, 1H), 7.75 (d, *J* = 15.6 Hz, 1H), 7.62 (t, *J* = 7.2 Hz, 1H), 7.55–7.51 (m, 3H), 7.46 (d, *J* = 8.0 Hz, 2H), 7.34 (d, *J* = 15.6 Hz, 1H), 7.25–7.20 (m, 3H), 7.10 (t, *J* = 7.6 Hz, 1H), 7.04–6.99 (m, 2H), 6.93 (d, *J* = 8.0 Hz, 2H), 6.30 (dd, *J* = 5.2, 2.5 Hz, 1H), 5.20 (d, *J* = 5.2 Hz, 1H), 3.75 (s, 3H), 2.22 (s, 3H); <sup>13</sup>C NMR (100 MHz, CDCl<sub>3</sub>): δ (ppm) 188.8, 160.1 (d, *J* = 245.0 Hz), 143.4, 138.6, 137.7, 136.1, 133.1, 132.6, 131.2, 129.5, 129.4, 129.1, 128.9 (d, *J* = 3.1 Hz), 128.8, 128.6, 127.3, 127.2, 125.3 (d, *J* = 5.1 Hz), 124.12, 124.10, 120.6, 120.4, 115.8, 115.6, 109.8, 49.5, 31.0, 21.3; <sup>19</sup>F NMR (376 MHz, CDCl<sub>3</sub>): δ (ppm) –115.51; HRMS (ESI-TOF) *m/z*: [M + Na]<sup>+</sup> Calcd for C<sub>32</sub>H<sub>27</sub>FN<sub>2</sub>O<sub>3</sub>SNa<sup>+</sup> 561.1619; Found 561.1624.

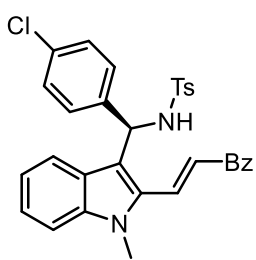

**(*R,E*)-*N*-((4-chlorophenyl)(1-methyl-2-(3-oxo-3-phenylprop-1-en-1-yl)-1*H*-indol-3-yl)methyl)-4-methylbenzenesulfonamide (**9n**):** An oven-dried 10 mL test-tube equipped with a septum and a magnetic stir bar was charged with 2-alkenyl indole **7a** (26.1 mg, 0.0999 mmol, 1.0 equiv), *N*-sulfonylimine **8c** (58.7 mg, 0.200 mmol, 2.0 equiv), Pd<sub>2</sub>(dba)<sub>3</sub> (4.6 mg, 0.0050 mmol, 5

mol%), ligand **L5** (6.8 mg, 0.010 mmol, 10 mol%), **A1** (0.9 mg, 0.005 mmol, 5 mol%) and 4 Å MS (40.0 mg). The tube was then evacuated and filled with argon. This cycle was repeated three times and xylene (1.0 mL) was added via syringe. The resulting solution was stirred at room temperature for 30 min, then at 50 °C for 4 d. After completion, Et<sub>2</sub>O (3 mL) was added and the mixture was stirred 30 min at 0 °C. The precipitates were filtered and washed with cold Et<sub>2</sub>O (3 × 3 mL). The cake was collected and dissolved in DCM. The mixture was filtered again, and washed with DCM (5 × 5 mL). The filtrate was concentrated to give pure product **9n**: 42.1 mg, as a yellow solid, 76%

yield; >19:1 *E/Z*; mp 112–114 °C;  $[\alpha]_D^{25} = +24.0$  ( $c = 0.25$ , in  $\text{CHCl}_3$ ); 98% ee, determined by HPLC analysis [Chiralpak column AD, *i*PrOH/*n*Hexane = 40/60, flow rate: 1.0 mL/min, 254 nm,  $t$  (minor) = 12.40 min,  $t$  (major) = 24.47 min];  $^1\text{H NMR}$  (400 MHz,  $\text{CDCl}_3$ ):  $\delta$  (ppm) 7.87 (d,  $J = 7.8$  Hz, 2H), 7.68 (d,  $J = 15.6$  Hz, 1H), 7.61 (t,  $J = 7.4$  Hz, 1H), 7.50 (t,  $J = 7.6$  Hz, 2H), 7.37 (d,  $J = 8.2$  Hz, 2H), 7.32 (d,  $J = 7.9$  Hz, 2H), 7.29–7.19 (m, 6H), 7.02 (t,  $J = 7.5$  Hz, 1H), 6.87 (d,  $J = 7.8$  Hz, 2H), 6.12 (d,  $J = 8.0$  Hz, 1H), 5.36 (d,  $J = 8.0$  Hz, 1H), 3.73 (s, 3H), 2.24 (s, 3H);  $^{13}\text{C NMR}$  (100 MHz,  $\text{CDCl}_3$ ):  $\delta$  (ppm) 188.6, 143.0, 138.7, 138.6, 137.5, 136.5, 133.6, 133.3, 133.0, 131.0, 128.81, 128.78, 128.76, 128.6, 128.5, 126.9, 125.3, 124.9, 124.4, 120.8, 120.0, 116.1, 109.8, 53.4, 30.7, 21.4; **HRMS** (ESI-TOF)  $m/z$ :  $[\text{M} + \text{Na}]^+$  Calcd for  $\text{C}_{32}\text{H}_{27}\text{ClN}_2\text{O}_3\text{SNa}^+$  577.1324 ( $^{35}\text{Cl}$ ), 578.1357 ( $^{37}\text{Cl}$ ); Found 577.1314 ( $^{35}\text{Cl}$ ), 578.1331 ( $^{37}\text{Cl}$ ).

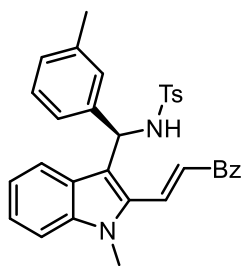

**(*R,E*)-4-methyl-*N*-((1-methyl-2-(3-oxo-3-phenylprop-1-en-1-yl)-1*H*-indol-3-yl)(*m*-tolyl)methyl)benzenesulfonamide (**9o**):** An oven-dried 10 mL test-tube equipped with a septum and a magnetic stir bar was charged with 2-alkenyl indole **7a** (26.1 mg, 0.0999 mmol, 1.0 equiv), *N*-sulfonylimine **8d** (54.6 mg, 0.200 mmol, 2.0 equiv),  $\text{Pd}_2(\text{dba})_3$  (4.6 mg, 0.0050 mmol, 5 mol%), ligand **L5** (6.8 mg, 0.010 mmol, 10 mol%), **A1** (0.9 mg, 0.005 mmol, 5 mol%) and 4 Å MS (40.0 mg). The

tube was then evacuated and filled with argon. This cycle was repeated three times and xylene (1.0 mL) was added via syringe. The resulting solution was stirred at room temperature for 30 min, then at 50 °C for 5 d. After completion,  $\text{Et}_2\text{O}$  (3 mL) was added and the mixture was stirred 30 min at 0 °C. The precipitates were filtered, and washed with cold  $\text{Et}_2\text{O}$  (3 × 3 mL). The cake was collected and dissolved in DCM. The mixture was filtered again and washed with DCM (5 × 5 mL). The filtrate was concentrated to give pure product **9o**: 35.8 mg, as a yellow solid, 67% yield; >19:1 *E/Z*; mp 84–85 °C;  $[\alpha]_D^{25} = -10.4$  ( $c = 0.25$ , in  $\text{CHCl}_3$ ); 99% ee, determined by HPLC analysis [Chiralpak column AD, *i*PrOH/*n*Hexane = 40/60, flow rate: 1.0 mL/min, 254 nm,  $t$  (minor) = 12.74 min,  $t$  (major) = 16.14 min];  $^1\text{H NMR}$  (400 MHz,  $\text{CDCl}_3$ ):  $\delta$  (ppm) 7.84 (d,  $J = 7.6$  Hz, 2H), 7.75 (d,  $J = 15.6$  Hz, 1H), 7.58 (t,  $J = 7.6$  Hz, 1H), 7.46 (t,  $J = 7.6$  Hz, 2H), 7.36 (d,  $J = 8.0$  Hz, 1H), 7.29 (d,  $J = 8.0$  Hz, 2H), 7.27–7.13 (m, 6H), 7.08 (t,  $J = 4.1$  Hz, 1H), 7.03–6.97 (m, 1H), 6.82 (d,  $J = 7.6$  Hz, 2H), 6.16 (d,  $J = 8.0$  Hz, 1H), 5.46 (d,  $J = 8.0$  Hz, 1H), 3.71 (s, 3H), 2.28 (s, 3H), 2.22 (s, 3H);  $^{13}\text{C NMR}$  (100 MHz,  $\text{CDCl}_3$ ):  $\delta$  (ppm) 188.7, 142.6, 139.9, 138.5, 138.4, 137.6, 136.6, 133.1, 132.9, 131.3, 128.7, 128.6, 128.57, 128.52, 128.4, 127.8, 126.8, 125.9, 124.8, 124.3, 124.1, 120.6, 120.3, 116.7, 109.6, 54.1, 30.5,

21.5, 21.3; **HRMS** (ESI-TOF)  $m/z$ :  $[M + Na]^+$  Calcd for  $C_{33}H_{30}N_2O_3SNa^+$  557.1870; Found 557.1875.

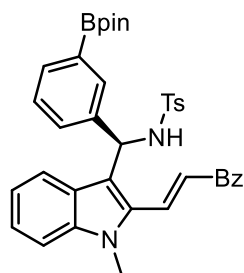

**(*R,E*)-4-methyl-*N*-((1-methyl-2-(3-oxo-3-phenylprop-1-en-1-yl)-1*H*-indol-3-yl)(3-(4,4,5,5-tetramethyl-1,3,2-dioxaborolan-2-yl)phenyl)methyl)benzenesulfonamide (**9p**):**

An oven-dried 10 mL test-tube equipped with a septum and a magnetic stir bar was charged with 2-alkenyl indole **7a** (26.1 mg, 0.0999 mmol, 1.0 equiv), *N*-sulfonylimine **8e** (77.0 mg, 0.200 mmol, 2.0 equiv),  $Pd_2(dba)_3$  (4.6 mg, 0.0050 mmol, 5 mol%), ligand **L5** (6.8 mg, 0.010 mmol, 10 mol%), **A1** (0.9 mg, 0.005 mmol, 5 mol%) and 4 Å MS (40.0 mg). The tube was then evacuated and filled with argon. This cycle was repeated three times and xylene (1.0 mL) was added via syringe. The resulting solution was stirred at room temperature for 30 min, then at 50 °C for 7 d. After completion,  $Et_2O$  (3 mL) was added and the mixture was stirred 30 min at 0 °C. The precipitates were filtered, and washed with cold  $Et_2O$  (3 × 3 mL). The cake was collected and dissolved in DCM. The mixture was filtered again, and washed with DCM (5 × 5 mL). The filtrate was concentrated to give pure product **9p**: 50.3 mg, as a yellow solid, 85% yield; *E/Z* = 8:1; mp 70–71 °C;  $[\alpha]_D^{25} = +12.8$  ( $c = 0.25$ , in  $CHCl_3$ ); 90% ee, determined by HPLC analysis [Chiralpak column IA, *i*PrOH/*n*Hexane = 20/80, flow rate: 1.0 mL/min, 254 nm,  $t$  (major) = 9.90 min,  $t$  (minor) = 11.18 min]; **<sup>1</sup>H NMR** (400 MHz,  $CDCl_3$ ):  $\delta$  (ppm) 7.99 (s, 1H), 7.85 (d,  $J = 7.9$  Hz, 2H), 7.78–7.70 (m, 2H), 7.59–7.54 (m, 1H), 7.46 (t,  $J = 7.7$  Hz, 2H), 7.40–7.30 (m, 3H), 7.29 (d,  $J = 2.8$  Hz, 1H), 7.24–7.15 (m, 4H), 6.98 (t,  $J = 7.3$  Hz, 1H), 6.80 (d,  $J = 7.9$  Hz, 2H), 6.23 (d,  $J = 7.8$  Hz, 1H), 5.44 (dd,  $J = 7.8, 2.4$  Hz, 1H), 3.69 (s, 3H), 2.22 (s, 3H), 1.32 (s, 12H); **<sup>13</sup>C NMR** (100 MHz,  $CDCl_3$ ):  $\delta$  (ppm) 188.8, 142.5, 139.1, 138.5, 137.6, 136.6, 134.2, 133.09, 133.07, 133.0, 131.3, 130.1, 128.7, 128.6, 128.5, 128.0, 126.9, 126.8, 125.8, 125.0, 124.1, 120.5, 120.3, 116.5, 109.6, 83.9, 54.1, 30.5, 24.8, 21.3; **HRMS** (ESI-TOF)  $m/z$ :  $[M + Na]^+$  Calcd for  $C_{38}H_{39}BN_2O_5SNa^+$  669.2565; Found 669.2569.

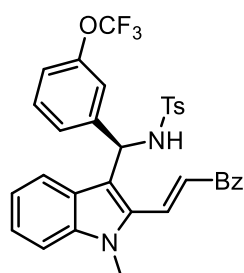

**(*R,E*)-4-methyl-*N*-((1-methyl-2-(3-oxo-3-phenylprop-1-en-1-yl)-1*H*-indol-3-yl)(3-(trifluoromethoxy)phenyl)methyl)benzenesulfonamide (**9q**):**

An oven-dried 10 mL test-tube equipped with a septum and a magnetic stir bar was charged with 2-alkenyl indole **7a** (26.1 mg, 0.0999 mmol, 1.0 equiv), *N*-sulfonylimine **8f** (68.6 mg, 0.200 mmol, 2.0 equiv),  $Pd_2(dba)_3$  (4.6 mg, 0.0050 mmol, 5 mol%), ligand **L5** (6.8 mg, 0.010 mmol, 10 mol%), **A1** (0.9 mg, 0.005 mmol, 5 mol%) and



4 Å MS (40.0 mg). The tube was then evacuated and filled with argon. This cycle was repeated three times and xylene (1.0 mL) was added via syringe. The resulting solution was stirred at room temperature for 30 min, then at 50 °C for 5 d. After completion, Et<sub>2</sub>O (3 mL) was added and the mixture was stirred 30 min at 0 °C. The precipitates were filtered, and washed with cold Et<sub>2</sub>O (3 × 3 mL). The cake was collected and dissolved in DCM. The mixture was filtered again, and washed with DCM (5 × 5 mL). The filtrate was concentrated to give pure product **9q**: 52.6 mg, as a yellow solid, 87% yield; >19:1 *E/Z*; mp 68–69 °C; [α]<sub>D</sub><sup>25</sup> = +5.6 (*c* = 0.25, in CHCl<sub>3</sub>); 99% ee, determined by HPLC analysis [Chiralpak column AD, *i*PrOH/*n*Hexane = 40/60, flow rate: 1.0 mL/min, 254 nm, *t* (major) = 9.58 min, *t* (minor) = 10.84 min]; **<sup>1</sup>H NMR** (400 MHz, CDCl<sub>3</sub>): δ (ppm) 7.90 (d, *J* = 7.2 Hz, 2H), 7.70 (d, *J* = 15.6 Hz, 1H), 7.60 (t, *J* = 7.4 Hz, 1H), 7.49 (t, *J* = 7.6 Hz, 2H), 7.39–7.27 (m, 6H), 7.26–7.19 (m, 3H), 7.13 (d, *J* = 8.0 Hz, 1H), 7.05–6.98 (m, 1H), 6.90 (d, *J* = 7.9 Hz, 2H), 6.15 (d, *J* = 7.9 Hz, 1H), 5.44–5.29 (m, 1H), 3.74 (s, 3H), 2.25 (s, 3H); **<sup>13</sup>C NMR** (100 MHz, CDCl<sub>3</sub>): δ (ppm) 188.5, 149.5, 143.1, 142.7, 138.6, 137.5, 136.4, 133.3, 133.1, 131.0, 130.0, 128.9, 128.8, 128.5, 126.9, 125.7, 125.2, 125.0, 124.4, 120.9, 120.4 (q, *J* = 256.0 Hz), 119.9, 119.8, 115.7, 109.9, 53.5, 30.8, 21.4; **<sup>19</sup>F NMR** (376 MHz, CDCl<sub>3</sub>): δ (ppm) –72.83; **HRMS** (ESI-TOF) *m/z*: [M + Na]<sup>+</sup> Calcd for C<sub>33</sub>H<sub>27</sub>F<sub>3</sub>N<sub>2</sub>O<sub>4</sub>SNa<sup>+</sup> 627.1536; Found 627.1532.

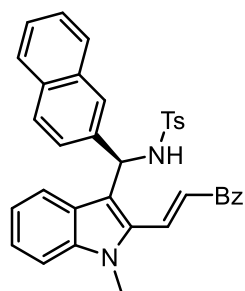

**(*R,E*)-4-methyl-*N*-((1-methyl-2-(3-oxo-3-phenylprop-1-en-1-yl)-1*H*-indol-**

**3-yl)(naphthalen-2-yl)methyl)benzenesulfonamide (**9r**):** An oven-dried 10

mL test-tube equipped with a septum and a magnetic stir bar was charged with

2-alkenyl indole **7a** (26.1 mg, 0.0999 mmol, 1.0 equiv), *N*-sulfonylimine **8g**

(61.8 mg, 0.200 mmol, 2.0 equiv), Pd<sub>2</sub>(dba)<sub>3</sub> (4.6 mg, 0.0050 mmol, 5 mol%),

ligand **L5** (6.8 mg, 0.010 mmol, 10 mol%), **A1** (0.9 mg, 0.005 mmol, 5 mol%)

and 4 Å MS (40.0 mg). The tube was then evacuated and filled with argon. This cycle was repeated three times and xylene (1.0 mL) was added via syringe. The resulting solution was stirred at room temperature for 30 min, then at 50 °C for 8 d. After completion, Et<sub>2</sub>O (3 mL) was added and the mixture was stirred 30 min at 0 °C. The precipitates were filtered and washed with cold Et<sub>2</sub>O (3 × 3 mL). The cake was collected and dissolved in DCM. The mixture was filtered again, and washed with DCM (5 × 5 mL). The filtrate was concentrated to give pure product **9r**: 48.9 mg, as a yellow solid, 86% yield; >19:1 *E/Z*; mp 157–159 °C; [α]<sub>D</sub><sup>25</sup> = +96.0 (*c* = 0.25, in CHCl<sub>3</sub>); 99% ee, determined by HPLC analysis [Chiralpak column AD, *i*PrOH/*n*Hexane = 40/60, flow rate: 1.0 mL/min, 254 nm, *t*

(minor) = 16.21 min, t (major) = 33.57 min]; **<sup>1</sup>H NMR** (400 MHz, CDCl<sub>3</sub>): δ (ppm) 7.89 (s, 1H), 7.82–7.67 (m, 6H), 7.54–7.41 (m, 4H), 7.39–7.29 (m, 5H), 7.26–7.18 (m, 3H), 6.97 (t, *J* = 7.3 Hz, 1H), 6.82 (d, *J* = 7.8 Hz, 2H), 6.35 (d, *J* = 8.0 Hz, 1H), 5.67 (d, *J* = 8.0 Hz, 1H), 3.71 (s, 3H), 2.21 (s, 3H); **<sup>13</sup>C NMR** (100 MHz, CDCl<sub>3</sub>): δ (ppm) 188.6, 142.7, 138.4, 137.5, 137.4, 136.7, 135.0, 133.2, 133.0, 132.7, 131.2, 128.6, 128.59, 128.57, 128.4, 128.2, 128.0, 127.5, 126.8, 126.3, 126.2, 125.8, 125.3, 124.9, 124.2, 120.6, 120.3, 116.4, 109.7, 54.2, 30.6, 21.3; **HRMS** (ESI-TOF) *m/z*: [M + Na]<sup>+</sup> Calcd for C<sub>36</sub>H<sub>30</sub>N<sub>2</sub>O<sub>3</sub>SNa<sup>+</sup> 593.1870; Found 593.1876.

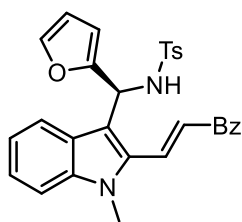

**(*R,E*)-*N*-(furan-2-yl(1-methyl-2-(3-oxo-3-phenylprop-1-en-1-yl)-1*H*-indol-3-yl)methyl)-4-methylbenzenesulfonamide (**9s**):**

An oven-dried 10 mL test-tube equipped with a septum and a magnetic stir bar was charged with 2-alkenyl indole **7a** (26.1 mg, 0.0999 mmol, 1.0 equiv), *N*-sulfonylimine **8h** (49.8 mg, 0.200 mmol, 2.0 equiv), Pd<sub>2</sub>(dba)<sub>3</sub> (4.6 mg, 0.0050 mmol, 5 mol%), ligand **L5** (6.8 mg, 0.010 mmol, 10 mol%), **A1** (0.9 mg, 0.005 mmol, 5 mol%) and 4 Å MS (40.0 mg). The tube was then evacuated and filled with argon. This cycle was repeated three times and xylene (1.0 mL) was added via syringe. The resulting solution was stirred at room temperature for 30 min, then at 50 °C for 7 d. After completion, purification by flash chromatography on silica gel (petroleum ether/EtOAc = 10/1–6/1) to give product **9s**: 49.1 mg, as a yellow solid, 96% yield; >19:1 *E/Z*; mp 56–58 °C; [α]<sub>D</sub><sup>25</sup> = –20.0 (*c* = 0.25, in CHCl<sub>3</sub>); 85% ee, determined by HPLC analysis [Chiralpak column AD, *i*PrOH/*n*Hexane = 40/60, flow rate: 1.0 mL/min, 254 nm, t (minor) = 16.37 min, t (major) = 27.17 min]; **<sup>1</sup>H NMR** (400 MHz, CDCl<sub>3</sub>): δ (ppm) 8.03 (d, *J* = 7.6 Hz, 2H), 7.78 (d, *J* = 15.8 Hz, 1H), 7.65–7.57 (m, 1H), 7.57–7.49 (m, 3H), 7.46 (d, *J* = 15.8 Hz, 1H), 7.37 (d, *J* = 7.9 Hz, 2H), 7.28 (d, *J* = 18.5 Hz, 1H), 7.23–7.15 (m, 2H), 7.03 (t, *J* = 7.4 Hz, 1H), 6.87 (d, *J* = 7.9 Hz, 2H), 6.24 (d, *J* = 19.0 Hz, 2H), 6.15 (d, *J* = 6.4 Hz, 1H), 5.56 (s, 1H), 3.71 (s, 3H), 2.23 (s, 3H); **<sup>13</sup>C NMR** (100 MHz, CDCl<sub>3</sub>): δ (ppm) 188.9, 152.2, 142.9, 142.5, 138.4, 137.6, 136.5, 133.3, 133.1, 131.2, 128.8, 128.7, 128.6, 126.9, 125.8, 125.4, 124.1, 120.5, 120.5, 114.1, 110.5, 109.6, 108.2, 49.2, 30.7, 21.3; **HRMS** (ESI-TOF) *m/z*: [M + Na]<sup>+</sup> Calcd for C<sub>30</sub>H<sub>26</sub>N<sub>2</sub>O<sub>4</sub>SNa<sup>+</sup> 533.1506; Found 533.1508.

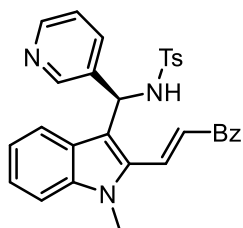

**(*S,E*)-4-methyl-*N*-((1-methyl-2-(3-oxo-3-phenylprop-1-en-1-yl)-1*H*-indol-3-yl)(pyridin-3-yl)methyl)benzenesulfonamide (**9t**):** An oven-dried 10 mL test-tube equipped with a septum and a magnetic stir bar was charged with 2-alkenyl indole **7a** (26.1 mg, 0.0999 mmol, 1.0 equiv), *N*-sulfonylimine **8i** (52.0 mg, 0.200 mmol, 2.0 equiv), Pd<sub>2</sub>(dba)<sub>3</sub> (4.6 mg, 0.0050 mmol, 5 mol%), ligand

**L5** (6.8 mg, 0.010 mmol, 10 mol%), **A1** (0.9 mg, 0.005 mmol, 5 mol%) and 4 Å MS (40.0 mg). The tube was then evacuated and filled with argon. This cycle was repeated three times and xylene (1.0 mL) was added via syringe. The resulting solution was stirred at room temperature for 30 min, then at 50 °C for 8 d. After completion, Et<sub>2</sub>O (3 mL) was added and the mixture was stirred 30 min at 0 °C. The precipitates were filtered, and washed with cold Et<sub>2</sub>O (3 × 3 mL). The cake was collected and dissolved in DCM. The mixture was filtered again and washed with DCM (5 × 5 mL). The filtrate was concentrated to give pure product **9t**: 38.1 mg, as a yellow solid, 73% yield; >19:1 *E/Z*; mp 88–89 °C; [α]<sup>25</sup><sub>D</sub> = –5.6 (*c* = 0.25, in CHCl<sub>3</sub>); 91% ee, determined by HPLC analysis [Chiralpak column AD, *i*PrOH/*n*Hexane = 40/60, flow rate: 1.0 mL/min, 254 nm, *t* (minor) = 19.96 min, *t* (major) = 31.55 min]; <sup>1</sup>H NMR (400 MHz, CDCl<sub>3</sub>): δ (ppm) 8.55 (d, *J* = 2.4 Hz, 1H), 8.49 (d, *J* = 4.8 Hz, 1H), 7.93 (d, *J* = 7.4 Hz, 2H), 7.85 (d, *J* = 8.0 Hz, 1H), 7.70 (d, *J* = 15.8 Hz, 1H), 7.60 (t, *J* = 7.4 Hz, 1H), 7.50 (t, *J* = 7.5 Hz, 2H), 7.38 (d, *J* = 8.0 Hz, 2H), 7.30 (d, *J* = 15.8 Hz, 1H), 7.27–7.18 (m, 4H), 6.98 (ddd, *J* = 8.0, 5.4, 2.5 Hz, 1H), 6.91 (d, *J* = 8.0 Hz, 2H), 6.17 (d, *J* = 7.5 Hz, 1H), 5.64 (d, *J* = 7.5 Hz, 1H), 3.74 (s, 3H), 2.24 (s, 3H); <sup>13</sup>C NMR (150 MHz, CDCl<sub>3</sub>): δ (ppm) 188.6, 148.9, 148.7, 143.2, 138.7, 137.5, 136.4, 135.8, 134.9, 133.3, 133.1, 131.0, 128.9, 128.8, 128.5, 126.9, 125.0, 124.9, 124.4, 123.3, 120.9, 119.9, 115.4, 109.9, 52.1, 30.9, 21.4; HRMS (ESI-TOF) *m/z*: [M + Na]<sup>+</sup> Calcd for C<sub>31</sub>H<sub>27</sub>N<sub>3</sub>O<sub>3</sub>SNa<sup>+</sup> 544.1666; Found 544.1670.

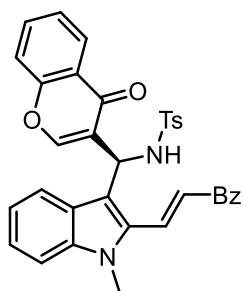

**(*S,E*)-4-methyl-*N*-((1-methyl-2-(3-oxo-3-phenylprop-1-en-1-yl)-1*H*-indol-3-yl)(4-oxo-4*H*-chromen-3-yl)methyl)benzenesulfonamide (**9u**):** An oven-dried 10 mL test-tube equipped with a septum and a magnetic stir bar was charged with 2-alkenyl indole **7a** (26.1 mg, 0.0999 mmol, 1.0 equiv), *N*-sulfonylimine **8j** (65.4 mg, 0.200 mmol, 2.0 equiv), Pd<sub>2</sub>(dba)<sub>3</sub> (4.6 mg, 0.0050 mmol, 5 mol%), ligand **L5** (6.8 mg, 0.010 mmol, 10 mol%), **A1** (0.9 mg, 0.005

mmol, 5 mol%) and 4 Å MS (40.0 mg). The tube was then evacuated and filled with argon. This cycle was repeated three times and xylene (1.0 mL) was added via syringe. The resulting solution was

stirred at room temperature for 30 min, then at 50 °C for 3 d. After completion, Et<sub>2</sub>O (3 mL) was added and the mixture was stirred 30 min at 0 °C. The precipitates were filtered and washed with cold Et<sub>2</sub>O (3 × 3 mL). The cake was collected and dissolved in DCM. The mixture was filtered again and washed with DCM (5 × 5 mL). The filtrate was concentrated to give pure product **9u**: 52.9 mg, as a yellow solid, 90% yield; >19:1 *E/Z*; mp 178–180 °C;  $[\alpha]_D^{25} = +297.6$  (*c* = 0.25, in CHCl<sub>3</sub>); 88% ee, determined by HPLC analysis [Chiralpak column IA, *i*PrOH/*n*Hexane = 40/60, flow rate: 1.0 mL/min, 254 nm, *t* (minor) = 12.26 min, *t* (major) = 15.84 min]; <sup>1</sup>H NMR (400 MHz, CDCl<sub>3</sub>): δ (ppm) 8.49 (s, 1H), 8.19–8.09 (m, 3H), 8.03 (d, *J* = 15.6 Hz, 1H), 7.69 (d, *J* = 9.4 Hz, 2H), 7.66–7.59 (m, 2H), 7.54 (t, *J* = 7.6 Hz, 2H), 7.52–7.43 (m, 3H), 7.36 (t, *J* = 7.6 Hz, 1H), 7.28–7.20 (m, 2H), 7.09–7.03 (m, 1H), 6.90 (d, *J* = 7.9 Hz, 2H), 6.01 (d, *J* = 3.5 Hz, 1H), 5.49 (d, *J* = 3.5 Hz, 1H), 3.73 (s, 3H), 2.18 (s, 3H); <sup>13</sup>C NMR (100 MHz, CDCl<sub>3</sub>): δ (ppm) 188.6, 177.2, 156.2, 155.4, 143.9, 138.4, 137.6, 135.0, 133.8, 133.5, 133.1, 130.7, 129.5, 128.8, 128.7, 127.4, 126.7, 125.7, 125.2, 125.1, 123.9, 123.8, 122.8, 120.6, 120.2, 118.1, 113.1, 109.9, 48.7, 30.9, 21.3; HRMS (ESI-TOF) *m/z*: [M + Na]<sup>+</sup> Calcd for C<sub>35</sub>H<sub>28</sub>N<sub>2</sub>O<sub>5</sub>SNa<sup>+</sup> 611.1612; Found 611.1612.

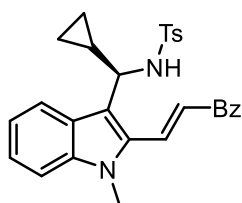

**(*R,E*)-*N*-(cyclopropyl(1-methyl-2-(3-oxo-3-phenylprop-1-en-1-yl)-1*H*-indol-3-yl)methyl)-4-methylbenzenesulfonamide (**9v**):** An oven-dried 10

mL test-tube equipped with a septum and a magnetic stir bar was charged with 2-alkenyl indole **7a** (26.1 mg, 0.0999 mmol, 1.0 equiv), *N*-sulfonylimine **8k** (44.6 mg, 0.200 mmol, 2.0 equiv), Pd<sub>2</sub>(dba)<sub>3</sub> (4.6 mg, 0.0050 mmol, 5 mol%), ligand **L5** (6.8 mg, 0.010 mmol, 10 mol%), **A1** (0.9 mg, 0.005 mmol, 5 mol%) and 4 Å MS (40.0 mg). The tube was then evacuated and filled with argon. This cycle was repeated three times and xylene (1.0 mL) was added via syringe. The resulting solution was stirred at room temperature for 30 min, then at 50 °C for 7 d. After completion, purification by flash chromatography on silica gel (petroleum ether/EtOAc = 10/1–4/1) to give product **9v**: 42.8 mg, as a yellow oil, 88% yield; >19:1 *E/Z*;  $[\alpha]_D^{25} = -12.8$  (*c* = 0.25, in CHCl<sub>3</sub>); 88% ee, determined by HPLC analysis [Chiralpak column IB, *i*PrOH/*n*Hexane = 20/80, flow rate: 1.0 mL/min, 254 nm, *t* (major) = 9.15 min, *t* (minor) = 10.66 min]; <sup>1</sup>H NMR (400 MHz, CDCl<sub>3</sub>): δ (ppm) 8.10 (d, *J* = 8.0 Hz, 2H), 7.82 (d, *J* = 15.6 Hz, 1H), 7.63 (dd, *J* = 13.0, 7.6 Hz, 2H), 7.60–7.52 (m, 3H), 7.33 (d, *J* = 8.0 Hz, 2H), 7.22 (d, *J* = 7.4 Hz, 1H), 7.17 (d, *J* = 8.3 Hz, 1H), 7.03 (t, *J* = 7.6 Hz, 1H), 6.80 (d, *J* = 8.0 Hz, 2H), 5.33 (d, *J* = 4.7 Hz, 1H), 4.30 (dd, *J* = 8.5, 4.7 Hz, 1H), 3.72 (s, 3H), 2.19 (s, 3H), 1.61–1.48 (m, 1H), 0.66–0.56 (m, 1H), 0.49–0.34 (m, 2H), 0.31–0.22 (m, 1H);

<sup>13</sup>C NMR (150 MHz, CDCl<sub>3</sub>): δ (ppm) 189.1, 142.6, 138.7, 137.9, 136.7, 133.1, 132.5, 131.7, 128.8, 128.6, 128.4, 126.9, 125.5, 124.2, 124.0, 120.7, 120.2, 117.5, 109.6, 56.2, 30.9, 21.3, 17.3, 5.1, 4.1; **HRMS** (ESI-TOF) m/z: [M + Na]<sup>+</sup> Calcd for C<sub>29</sub>H<sub>28</sub>N<sub>2</sub>O<sub>3</sub>SNa<sup>+</sup> 507.1713; Found 507.1719.

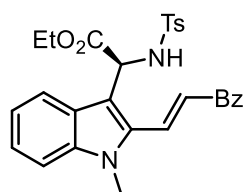

**Ethyl (S,E)-2-(1-methyl-2-(3-oxo-3-phenylprop-1-en-1-yl)-1H-indol-3-yl)-2-((4-methylphenyl)sulfonyl)acetate (9w)**: An oven-dried 10 mL test-tube equipped with a septum and a magnetic stir bar was charged with 2-alkenyl indole **7a** (26.1 mg, 0.0999 mmol, 1.0 equiv), *N*-sulfonylimine **8l** (51.0

mg, 0.200 mmol, 2.0 equiv), Pd<sub>2</sub>(dba)<sub>3</sub> (4.6 mg, 0.0050 mmol, 5 mol%), ligand **L5** (6.8 mg, 0.010 mmol, 10 mol%), **A1** (0.9 mg, 0.005 mmol, 5 mol%) and 4 Å MS (40.0 mg). The tube was then evacuated and filled with argon. This cycle was repeated three times and xylene (1.0 mL) was added via syringe. The resulting solution was stirred at room temperature for 30 min, then at 60 °C for 4 d. After completion, purification by flash chromatography on silica gel (petroleum ether/EtOAc = 10/1–4/1) to give product **9w**: 31.6 mg, as a yellow oil, 61% yield; *E/Z* = 17:1; [α]<sub>D</sub><sup>25</sup> = +69.6 (*c* = 0.25, in CHCl<sub>3</sub>); 96% ee, determined by HPLC analysis [Chiralpak column AD, *i*PrOH/*n*Hexane = 40/60, flow rate: 1.0 mL/min, 254 nm, *t* (minor) = 14.91 min, *t* (major) = 16.87 min]; <sup>1</sup>H NMR (400 MHz, CDCl<sub>3</sub>): δ (ppm) 8.16 (d, *J* = 8.0 Hz, 2H), 7.82 (d, *J* = 5.6 Hz, 2H), 7.65–7.53 (m, 4H), 7.36 (d, *J* = 8.3 Hz, 2H), 7.25–7.21 (m, 1H), 7.17 (dt, *J* = 8.4, 1.0 Hz, 1H), 7.07 (ddd, *J* = 8.0, 6.8, 1.1 Hz, 1H), 6.85 (d, *J* = 8.0 Hz, 2H), 5.91 (d, *J* = 6.4 Hz, 1H), 5.58 (d, *J* = 6.5 Hz, 1H), 4.20 (dq, *J* = 10.8, 7.2 Hz, 1H), 4.03 (dq, *J* = 10.8, 7.2 Hz, 1H), 3.70 (s, 3H), 2.23 (s, 3H), 1.14 (t, *J* = 7.2 Hz, 3H); <sup>13</sup>C NMR (100 MHz, CDCl<sub>3</sub>): δ (ppm) 188.9, 169.8, 142.9, 138.0, 137.6, 136.3, 134.5, 133.3, 130.9, 128.8, 128.8, 128.6, 126.9, 126.6, 125.2, 124.0, 120.8, 120.1, 110.6, 109.5, 62.5, 52.9, 30.6, 21.3, 14.0; **HRMS** (ESI-TOF) m/z: [M + Na]<sup>+</sup> Calcd for C<sub>29</sub>H<sub>28</sub>N<sub>2</sub>O<sub>5</sub>SNa<sup>+</sup> 539.1612; Found 539.1620.

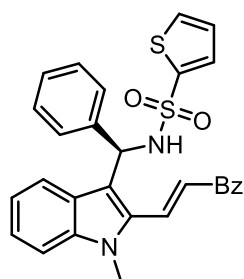

**(R,E)-N-((1-methyl-2-(3-oxo-3-phenylprop-1-en-1-yl)-1H-indol-3-yl)(phenyl)methyl)thiophene-2-sulfonamide (9x)**: An oven-dried 10 mL test-tube equipped with a septum and a magnetic stir bar was charged with 2-alkenyl indole **7a** (26.1 mg, 0.0999 mmol, 1.0 equiv), *N*-sulfonylimine **8m** (50.2 mg, 0.200 mmol, 2.0 equiv), Pd<sub>2</sub>(dba)<sub>3</sub> (4.6 mg, 0.0050 mmol, 5 mol%), ligand **L5** (6.8 mg, 0.010 mmol, 10 mol%), **A1** (0.9 mg, 0.005 mmol, 5 mol%)

and 4 Å MS (40.0 mg). The tube was then evacuated and filled with argon. This cycle was repeated

three times and xylene (1.0 mL) was added via syringe. The resulting solution was stirred at room temperature for 30 min, then at 50 °C for 3 d. After completion, Et<sub>2</sub>O (3 mL) was added and the mixture was stirred 30 min at 0 °C. The precipitates were filtered and washed with cold Et<sub>2</sub>O (3 × 3 mL). The cake was collected and dissolved in DCM. The mixture was filtered again and washed with DCM (5 × 5 mL). The filtrate was concentrated to give pure product **9x**: 48.2 mg, as a yellow solid, 94% yield; >19:1 *E/Z*; mp 185–187 °C; [ $\alpha$ ]<sub>D</sub><sup>25</sup> = -1.6 (*c* = 0.25, in CHCl<sub>3</sub>); 93% ee, determined by HPLC analysis [Chiralpak column IB, *i*PrOH/*n*Hexane = 40/60, flow rate: 1.0 mL/min, 254 nm, *t* (major) = 7.66 min, *t* (minor) = 8.47 min]; **<sup>1</sup>H NMR** (600 MHz, CDCl<sub>3</sub>):  $\delta$  (ppm) 7.85 (d, *J* = 7.7 Hz, 2H), 7.81 (d, *J* = 15.6 Hz, 1H), 7.57 (t, *J* = 7.4 Hz, 1H), 7.46 (t, *J* = 7.6 Hz, 2H), 7.42 (d, *J* = 7.6 Hz, 2H), 7.37 (d, *J* = 8.0 Hz, 1H), 7.32–7.25 (m, 7H), 7.18 (t, *J* = 2.4 Hz, 1H), 7.02 (ddd, *J* = 8.0, 5.9, 2.0 Hz, 1H), 6.68 (t, *J* = 4.3 Hz, 1H), 6.27 (d, *J* = 7.6 Hz, 1H), 5.64 (d, *J* = 7.6 Hz, 1H), 3.77 (s, 3H); **<sup>13</sup>C NMR** (150 MHz, CDCl<sub>3</sub>):  $\delta$  (ppm) 188.8, 140.7, 139.9, 138.6, 137.6, 133.1, 133.0, 132.4, 131.6, 131.3, 128.7, 128.5, 127.7, 127.1, 126.6, 125.7, 125.0, 124.3, 120.7, 120.2, 116.7, 109.9, 54.4, 30.8; **HRMS** (ESI-TOF) *m/z*: [M + Na]<sup>+</sup> Calcd for C<sub>29</sub>H<sub>24</sub>N<sub>2</sub>O<sub>3</sub>S<sub>2</sub>Na<sup>+</sup> 535.1121; Found 535.1119.

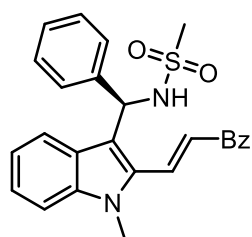

**(*R,E*)-N-((1-methyl-2-(3-oxo-3-phenylprop-1-en-1-yl)-1H-indol-3-yl)(phenyl)methyl)methanesulfonamide (**9y**):** An oven-dried 10 mL test-tube

equipped with a septum and a magnetic stir bar was charged with 2-alkenyl indole **7a** (26.1 mg, 0.0999 mmol, 1.0 equiv), *N*-sulfonylimine **8n** (36.6 mg, 0.200 mmol, 2.0 equiv), Pd<sub>2</sub>(dba)<sub>3</sub> (4.6 mg, 0.0050 mmol, 5 mol%), ligand **L5** (6.8 mg, 0.010 mmol, 10 mol%), **A1** (0.9 mg, 0.005 mmol, 5 mol%) and 4 Å MS (40.0 mg). The tube was then evacuated and filled with argon. This cycle was repeated three times and xylene (1.0 mL) was added via syringe. The resulting solution was stirred at room temperature for 30 min, then at 50 °C for 7 d. After completion, Et<sub>2</sub>O (3 mL) was added and the mixture was stirred 30 min at 0 °C. The precipitates were filtered and washed with cold Et<sub>2</sub>O (3 × 3 mL). The cake was collected and dissolved in DCM. The mixture was filtered again and washed with DCM (5 × 5 mL). The filtrate was concentrated to give pure product **9y**: 41.1 mg, as a yellow solid, 92% yield; >19:1 *E/Z*; mp 171–173 °C; [ $\alpha$ ]<sub>D</sub><sup>25</sup> = +34.4 (*c* = 0.25, in CHCl<sub>3</sub>); 99% ee, determined by HPLC analysis [Chiralpak column IA, *i*PrOH/*n*Hexane = 40/60, flow rate: 1.0 mL/min, 254 nm, *t* (minor) = 8.86 min, *t* (major) = 12.03 min]; **<sup>1</sup>H NMR** (400 MHz, CDCl<sub>3</sub>):  $\delta$  (ppm) 8.03 (d, *J* = 15.6 Hz, 1H), 7.88 (d, *J* = 7.6 Hz, 2H), 7.62 (d, *J* = 8.0 Hz, 1H), 7.56 (t, *J* = 7.4 Hz, 1H), 7.50–7.41 (m, 5H), 7.42–7.26 (m, 5H), 7.12

(t,  $J = 7.6$  Hz, 1H), 6.41 (d,  $J = 7.0$  Hz, 1H), 5.36 (d,  $J = 7.1$  Hz, 1H), 3.89 (s, 3H), 2.60 (s, 3H);  $^{13}\text{C}$  NMR (150 MHz,  $\text{CDCl}_3$ ):  $\delta$  (ppm) 188.9, 140.2, 138.7, 137.5, 133.1, 133.0, 131.2, 128.9, 128.7, 128.6, 127.9, 127.2, 125.8, 125.6, 124.4, 120.9, 120.5, 116.7, 110.2, 54.4, 41.7, 31.0; HRMS (ESI-TOF)  $m/z$ :  $[\text{M} + \text{Na}]^+$  Calcd for  $\text{C}_{26}\text{H}_{24}\text{N}_2\text{O}_3\text{SNa}^+$  467.1400; Found 467.1408.

## 11. General procedure for the asymmetric Friedel–Crafts reaction of 2-alkenyl pyrroles **10** with imines **8**

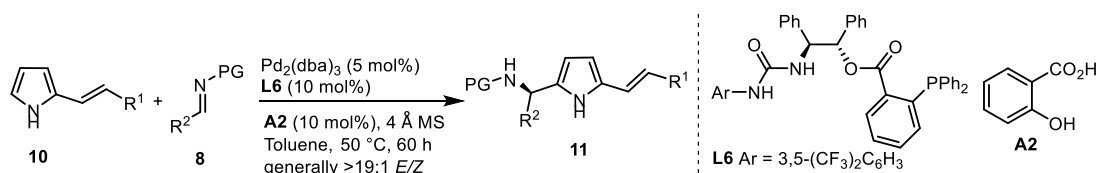

An oven-dried 10 mL test-tube equipped with a septum and a magnetic stir bar was charged with 2-alkenyl pyrrole **10** (0.12 mmol, 1.2 equiv), *N*-sulfonylimine **8** (0.10 mmol, 1.0 equiv),  $\text{Pd}_2(\text{dba})_3$  (4.6 mg, 0.0050 mmol, 5 mol%), ligand **L6** (7.6 mg, 0.010 mmol, 10 mol%), **A2** (1.4 mg, 0.010 mmol, 10 mol%) and 4 Å MS (40.0 mg). The tube was then evacuated and filled with argon. This cycle was repeated three times and toluene (1.0 mL) was added via syringe. The resulting solution was stirred at room temperature for 30 min. then stirred at 50 °C (monitored by TLC analysis). After completion, product **11** was obtained by flash chromatography on silica gel (petroleum ether/DCM/EtOAc). Racemic **11** was obtained under the catalysis of  $\text{Pd}(\text{PPh}_3)_4$  (10 mol%) and using **A2** (10 mol%) as an acidic additive.

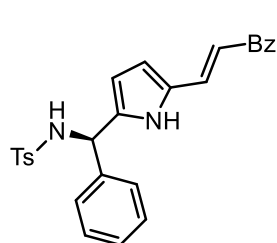

**(*R,E*)-4-methyl-*N*-((5-(3-oxo-3-phenylprop-1-en-1-yl)-1H-pyrrol-2-yl)(phenyl)methyl)benzenesulfonamide (**11a**):** An oven-dried 10 mL test-tube

equipped with a septum and a magnetic stir bar was charged with 2-alkenyl pyrrole **10a** (23.6 mg, 0.120 mmol, 1.2 equiv), *N*-sulfonylimine **8a** (25.9 mg, 0.0999 mmol, 1.0 equiv),  $\text{Pd}_2(\text{dba})_3$  (4.6 mg, 0.0050 mmol, 5 mol%), ligand **L6** (7.6 mg, 0.010 mmol, 10 mol%), **A2** (1.4 mg, 0.010 mmol, 10 mol%) and 4 Å MS (40.0 mg). The

tube was then evacuated and filled with argon. This cycle was repeated three times and toluene (1.0 mL) was added via syringe. The resulting solution was stirred at room temperature for 30 min, then at 50 °C for 60 h. After completion, purification by flash chromatography on silica gel (petroleum ether/DCM/EtOAc = 5/5/1) to give product **11a**: 33.6 mg, as a yellow oil, 74% yield; >19:1 *E/Z*;  $[\alpha]_D^{25} = +4.6$  ( $c = 0.65$ , in  $\text{CHCl}_3$ ); 97% ee, determined by HPLC analysis [Chiralpak column ID, *i*PrOH/*n*Hexane = 40/60, flow rate: 1.0 mL/min, 254 nm,  $t$  (major) = 15.07 min,  $t$  (minor) = 17.69

min]; **<sup>1</sup>H NMR** (400 MHz, CDCl<sub>3</sub>): δ (ppm) 9.66 (s, 1H), 7.89–7.83 (m, 2H), 7.59–7.47 (m, 4H), 7.40 (t, *J* = 7.6 Hz, 2H), 7.21–7.13 (m, 3H), 7.13–7.04 (m, 4H), 7.00 (d, *J* = 15.6 Hz, 1H), 6.43 (d, *J* = 3.0 Hz, 1H), 6.14 (d, *J* = 8.4 Hz, 1H), 5.80 (d, *J* = 3.0 Hz, 1H), 5.67 (d, *J* = 8.4 Hz, 1H), 2.28 (s, 3H); **<sup>13</sup>C NMR** (150 MHz, CDCl<sub>3</sub>): δ (ppm) 191.0, 143.5, 138.4, 138.3, 136.8, 136.4, 134.8, 132.4, 129.8, 129.4, 128.6, 128.5, 128.3, 128.1, 127.2, 127.0, 116.3, 115.7, 111.1, 55.8, 21.4; **HRMS** (ESI-TOF) *m/z*: [M + Na]<sup>+</sup> Calcd for C<sub>27</sub>H<sub>24</sub>N<sub>2</sub>O<sub>3</sub>SNa<sup>+</sup> 479.1400; Found 479.1402.

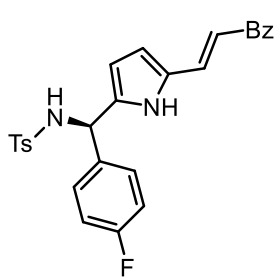

**(*R,E*)-*N*-((4-fluorophenyl)(5-(3-oxo-3-phenylprop-1-en-1-yl)-1*H*-pyrrol-2-yl)methyl)-4-methylbenzenesulfonamide (**11b**):** An oven-dried 10 mL test-tube equipped with a septum and a magnetic stir bar was charged with 2-alkenyl pyrrole **10a** (23.6 mg, 0.120 mmol, 1.2 equiv), *N*-sulfonylimine **8o** (27.7 mg, 0.0999 mmol, 1.0 equiv), Pd<sub>2</sub>(dba)<sub>3</sub> (4.6 mg, 0.0050 mmol, 5

mol%), ligand **L6** (7.6 mg, 0.010 mmol, 10 mol%), **A2** (1.4 mg, 0.010 mmol, 10 mol%) and 4 Å MS (40.0 mg). The tube was then evacuated and filled with argon. This cycle was repeated three times and toluene (1.0 mL) was added via syringe. The resulting solution was stirred at room temperature for 30 min, then at 50 °C for 60 h. After completion, purification by flash chromatography on silica gel (petroleum ether/DCM/EtOAc = 5/5/1) to give product **11b**: 31.9 mg, as a yellow oil, 67% yield; >19:1 *E/Z*; [α]<sub>D</sub><sup>25</sup> = +106.3 (*c* = 0.16, in CHCl<sub>3</sub>); 99% ee, determined by HPLC analysis [Chiralpak column IB, *i*PrOH/*n*Hexane = 10/90, flow rate: 1.0 mL/min, 254 nm, *t* (major) = 29.33 min, *t* (minor) = 38.20 min]; **<sup>1</sup>H NMR** (400 MHz, CDCl<sub>3</sub>): δ (ppm) 9.71 (s, 1H), 7.85 (d, *J* = 7.0 Hz, 2H), 7.57–7.48 (m, 4H), 7.41 (dd, *J* = 8.3, 7.0 Hz, 2H), 7.11–7.04 (m, 4H), 7.01 (d, *J* = 15.6 Hz, 1H), 6.82 (t, *J* = 8.6 Hz, 2H), 6.43 (dd, *J* = 3.7, 2.5 Hz, 1H), 6.24 (d, *J* = 8.6 Hz, 1H), 5.77 (dd, *J* = 3.7, 2.4 Hz, 1H), 5.66 (d, *J* = 8.6 Hz, 1H), 2.30 (s, 3H); **<sup>13</sup>C NMR** (100 MHz, CDCl<sub>3</sub>): δ (ppm) 191.3, 162.3 (d, *J* = 245.9 Hz), 143.7, 138.3, 136.8, 136.1, 134.9, 134.1 (d, *J* = 3.4 Hz), 132.5, 129.9, 129.4, 129.1 (d, *J* = 8.3 Hz), 128.5, 128.3, 127.0, 116.1, 115.9, 115.4 (d, *J* = 21.5 Hz), 111.2, 55.2, 21.4; **<sup>19</sup>F NMR** (376 MHz, CDCl<sub>3</sub>): δ (ppm) –113.71; **HRMS** (ESI-TOF) *m/z*: [M + Na]<sup>+</sup> Calcd for C<sub>27</sub>H<sub>23</sub>FN<sub>2</sub>O<sub>3</sub>SNa<sup>+</sup> 497.1306; Found 497.1305.



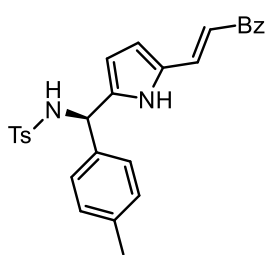

**(*R,E*)-4-methyl-*N*-((5-(3-oxo-3-phenylprop-1-en-1-yl)-1*H*-pyrrol-2-yl)(p-tolyl)methyl)benzenesulfonamide (11c):** An oven-dried 10 mL test-tube

equipped with a septum and a magnetic stir bar was charged with 2-alkenyl pyrrole **10a** (23.6 mg, 0.120 mmol, 1.2 equiv), *N*-sulfonylimine **8p** (27.3mg,

0.0999 mmol, 1.0 equiv), Pd<sub>2</sub>(dba)<sub>3</sub> (4.6 mg, 0.0050 mmol, 5 mol%), ligand

**L6** (7.6 mg, 0.010 mmol, 10 mol%), **A2** (1.4 mg, 0.010 mmol, 10 mol%) and 4 Å MS (40.0 mg). The tube was then evacuated and filled with argon. This cycle was repeated three times and toluene (1.0 mL) was added via syringe. The resulting solution was stirred at room temperature for 30 min. then at 50 °C for 60 h. After completion, purification by flash chromatography on silica gel (petroleum ether/DCM/EtOAc = 5/5/1) to give product **11c**: 27.6 mg, as a yellow oil, 59% yield; >19:1 *E/Z*; [α]<sub>D</sub><sup>25</sup> = +43.6 (*c* = 0.2, in CHCl<sub>3</sub>); 93% ee, determined by HPLC analysis [Chiralpak column IA, *i*PrOH/*n*Hexane = 20/80, flow rate: 1.0 mL/min, 254 nm, *t* (major) = 16.84 min, *t* (minor) = 19.47 min]; **<sup>1</sup>H NMR** (400 MHz, CDCl<sub>3</sub>): δ (ppm) 9.62 (s, 1H), 7.86 (d, *J* = 7.2 Hz, 2H), 7.58–7.46 (m, 4H), 7.39 (t, *J* = 7.6 Hz, 2H), 7.07 (d, *J* = 7.9 Hz, 2H), 7.00 (d, *J* = 15.6 Hz, 1H), 6.98–6.93 (m, 4H), 6.43 (d, *J* = 3.7 Hz, 1H), 6.03 (d, *J* = 8.1 Hz, 1H), 5.80 (dd, *J* = 3.7, 2.1 Hz, 1H), 5.60 (d, *J* = 8.1 Hz, 1H), 2.29 (s, 3H), 2.24 (s, 3H); **<sup>13</sup>C NMR** (100 MHz, CDCl<sub>3</sub>): δ (ppm) 190.8, 143.6, 138.4, 138.1, 136.7, 136.6, 135.2, 134.6, 132.4, 129.7, 129.44, 129.35, 128.5, 128.3, 127.2, 127.0, 116.2, 115.6, 111.0, 55.6, 21.4, 21.0; **HRMS** (ESI-TOF) *m/z*: [M + Na]<sup>+</sup> Calcd for C<sub>28</sub>H<sub>26</sub>N<sub>2</sub>O<sub>3</sub>SNa<sup>+</sup> 493.1557; Found 493.1556.

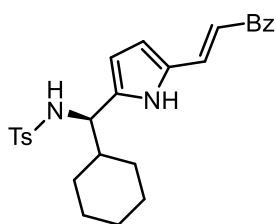

**(*R,E*)-*N*-(cyclohexyl(5-(3-oxo-3-phenylprop-1-en-1-yl)-1*H*-pyrrol-2-yl)methyl)-4-methylbenzenesulfonamide (11d):** An oven-dried 10 mL test-

tube equipped with a septum and a magnetic stir bar was charged with 2-alkenyl pyrrole **10a** (23.6 mg, 0.120 mmol, 1.2 equiv), *N*-sulfonylimine **8q**

(26.5 mg, 0.0999 mmol, 1.0 equiv), Pd<sub>2</sub>(dba)<sub>3</sub> (4.6 mg, 0.0050 mmol, 5

mol%), ligand **L6** (7.6 mg, 0.010 mmol, 10 mol%), **A2** (1.4 mg, 0.010 mmol, 10 mol%) and 4 Å MS (40.0 mg). The tube was then evacuated and filled with argon. This cycle was repeated three times and toluene (1.0 mL) was added via syringe. The resulting solution was stirred at room temperature for 30 min. then at 50 °C for 60 h. After completion, purification by flash chromatography on silica gel (petroleum ether/DCM/EtOAc = 5/5/1) to give product **11d**: 35.4 mg, as a yellow oil, 77% yield; *E/Z* = 17:1; [α]<sub>D</sub><sup>25</sup> = +175.0 (*c* = 0.84, in CHCl<sub>3</sub>); 94% ee, determined by HPLC analysis [Chiralpak

column IB, *i*PrOH/*n*Hexane = 20/80, flow rate: 1.0 mL/min, 254 nm, *t* (major) = 8.98 min, *t* (minor) = 12.28 min]; **<sup>1</sup>H NMR** (400 MHz, CDCl<sub>3</sub>): δ (ppm) 9.74 (s, 1H), 7.91 (d, *J* = 7.1 Hz, 2H), 7.61–7.51 (m, 3H), 7.50–7.41 (m, 3H), 7.03 (d, *J* = 8.1 Hz, 2H), 6.93 (d, *J* = 15.5 Hz, 1H), 6.39 (dd, *J* = 3.7, 2.5 Hz, 1H), 6.19 (d, *J* = 9.4 Hz, 1H), 5.89 (dd, *J* = 3.7, 2.2 Hz, 1H), 4.25 (dd, *J* = 9.4, 7.8 Hz, 1H), 2.24 (s, 3H), 1.87 (d, *J* = 12.7 Hz, 1H), 1.67–1.45 (m, 4H), 1.34 (dd, *J* = 12.7, 4.0 Hz, 1H), 1.13–0.95 (m, 3H), 0.97–0.78 (m, 2H); **<sup>13</sup>C NMR** (100 MHz, CDCl<sub>3</sub>): δ (ppm) 192.7, 143.1, 138.5, 137.4, 137.2, 135.9, 132.4, 129.2, 128.9, 128.6, 128.4, 126.7, 116.6, 115.4, 110.7, 57.4, 42.9, 29.59, 29.56, 26.0, 25.7, 21.4, 21.39; **HRMS** (ESI-TOF) *m/z*: [M + Na]<sup>+</sup> Calcd for C<sub>27</sub>H<sub>30</sub>N<sub>2</sub>O<sub>3</sub>SNa<sup>+</sup> 485.1870; Found 485.1869.

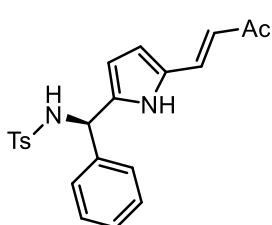

**(*R,E*)-4-methyl-*N*-((5-(3-oxobut-1-en-1-yl)-1*H*-pyrrol-2-yl)(phenyl)**

**methyl)benzenesulfonamide (11e):** An oven-dried 10 mL test-tube equipped

with a septum and a magnetic stir bar was charged with 2-alkenyl pyrrole **10b**

(16.2 mg, 0.120 mmol, 1.2 equiv), *N*-sulfonylimine **8a** (25.9 mg, 0.0999 mmol,

1.0 equiv), Pd<sub>2</sub>(dba)<sub>3</sub> (4.6 mg, 0.0050 mmol, 5 mol%), ligand **L6** (7.6 mg,

0.010 mmol, 10 mol%), **A2** (1.4 mg, 0.010 mmol, 10 mol%) and 4 Å MS (40.0 mg). The tube was

then evacuated and filled with argon. This cycle was repeated three times and toluene (1.0 mL) was

added via syringe. The resulting solution was stirred at room temperature for 30 min, then at 50 °C

for 60 h. After completion, purification by flash chromatography on silica gel (petroleum

ether/DCM/EtOAc = 5/1/1) to give product **11e**: 18.8 mg, as a yellow oil, 48% yield; >19:1 *E/Z*;

[α]<sub>D</sub><sup>25</sup> = +121.4 (*c* = 0.28, in CHCl<sub>3</sub>); 90% ee, determined by HPLC analysis [Chiralpak column ID,

*i*PrOH/*n*Hexane = 20/80, flow rate: 1.0 mL/min, 254 nm, *t* (minor) = 32.41 min, *t* (major) = 34.33

min]; **<sup>1</sup>H NMR** (400 MHz, CDCl<sub>3</sub>): δ (ppm) 9.96 (s, 1H), 7.49 (d, *J* = 8.2 Hz, 2H), 7.26 (d, *J* = 3.5

Hz, 1H), 7.26–7.14 (m, 5H), 7.03 (d, *J* = 8.0 Hz, 2H), 6.85 (d, *J* = 9.4 Hz, 1H), 6.36 (t, *J* = 3.0 Hz,

1H), 6.23 (d, *J* = 16.2 Hz, 1H), 5.92 (t, *J* = 3.0 Hz, 1H), 5.73 (d, *J* = 9.4 Hz, 1H), 2.29 (s, 3H), 2.27

(s, 3H); **<sup>13</sup>C NMR** (100 MHz, CDCl<sub>3</sub>): δ (ppm) 200.4, 143.0, 139.1, 137.2, 137.1, 135.0, 129.1, 128.7,

128.6, 127.8, 127.0, 126.8, 120.4, 117.2, 111.1, 55.7, 25.8, 21.4; **HRMS** (ESI-TOF) *m/z*: [M + Na]<sup>+</sup>

Calcd for C<sub>22</sub>H<sub>22</sub>N<sub>2</sub>O<sub>3</sub>SNa<sup>+</sup> 417.1244; Found 417.1237.

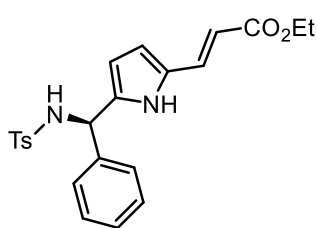

**Ethyl (*R,E*)-3-(5-(((4-methylphenyl)sulfonamido)(phenyl)methyl)-1*H*-pyrrol-2-yl)acrylate (**11f**):** An oven-dried 10 mL test-tube equipped with a septum and a magnetic stir bar was charged with 2-alkenyl pyrrole **10c** (19.8 mg, 0.120 mmol, 1.2 equiv), *N*-sulfonylimine **8a** (25.9 mg, 0.0999 mmol, 1.0 equiv), Pd<sub>2</sub>(dba)<sub>3</sub> (4.6 mg, 0.0050 mmol, 5 mol%), ligand **L6** (7.6 mg, 0.010 mmol, 10 mol%), **A2** (1.4 mg, 0.010 mmol, 10 mol%) and 4 Å MS (40.0 mg). The tube was then evacuated and filled with argon. This cycle was repeated three times and toluene (1.0 mL) was added via syringe. The resulting solution was stirred at room temperature for 30 min, then at 50 °C for 60 h. After completion, purification by flash chromatography on silica gel (petroleum ether/DCM/EtOAc = 5/1/1) to give product **11f**: 25.2 mg, as a faint red oil, 59% yield; >19:1 *E/Z*; [α]<sup>25</sup><sub>D</sub> = +88.7 (*c* = 0.55, in CHCl<sub>3</sub>); 91% ee, determined by HPLC analysis [Chiralpak column AD, *i*PrOH/*n*Hexane = 20/80, flow rate: 1.0 mL/min, 254 nm, *t* (minor) = 12.14 min, *t* (major) = 17.87 min]; <sup>1</sup>H NMR (400 MHz, CDCl<sub>3</sub>): δ (ppm) 9.25 (s, 1H), 7.55 (d, *J* = 8.0 Hz, 2H), 7.36 (d, *J* = 15.9 Hz, 1H), 7.23–7.19 (m, 3H), 7.13 (dd, *J* = 6.6, 2.7 Hz, 2H), 7.10 (d, *J* = 8.0 Hz, 2H), 6.29 (t, *J* = 3.1 Hz, 1H), 6.03–5.91 (m, 1H), 5.85 (d, *J* = 15.9 Hz, 1H), 5.77 (t, *J* = 3.0 Hz, 1H), 5.64 (d, *J* = 8.4 Hz, 1H), 4.30–4.01 (m, 2H), 2.33 (s, 3H), 1.27 (t, *J* = 7.2 Hz, 3H); <sup>13</sup>C NMR (150 MHz, CDCl<sub>3</sub>): δ (ppm) 168.1, 143.5, 138.5, 136.9, 135.4, 134.2, 129.4, 128.9, 128.6, 128.0, 127.2, 126.9, 114.9, 111.1, 110.5, 60.5, 55.7, 21.4, 14.3; HRMS (ESI-TOF) *m/z*: [M + Na]<sup>+</sup> Calcd for C<sub>23</sub>H<sub>24</sub>N<sub>2</sub>O<sub>4</sub>SNa<sup>+</sup> 447.1349; Found 447.1352.

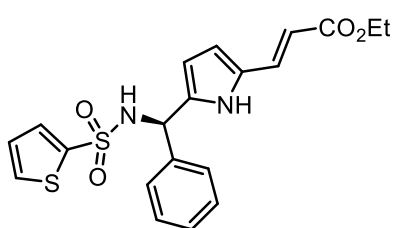

**Ethyl (*R,E*)-3-(5-(phenyl(thiophene-2-sulfonamido)methyl)-1*H*-pyrrol-2-yl)acrylate (**11g**):** An oven-dried 10 mL test-tube equipped with a septum and a magnetic stir bar was charged with 2-alkenyl pyrrole **10c** (19.8 mg, 0.120 mmol, 1.2 equiv), *N*-sulfonylimine **8m** (25.1 mg, 0.0999 mmol, 1.0 equiv), Pd<sub>2</sub>(dba)<sub>3</sub> (4.6 mg, 0.0050 mmol, 5 mol%), ligand **L6** (7.6 mg, 0.010 mmol, 10 mol%), **A2** (1.4 mg, 0.010 mmol, 10 mol%) and 4 Å MS (40.0 mg). The tube was then evacuated and filled with argon. This cycle was repeated three times and toluene (1.0 mL) was added via syringe. The resulting solution was stirred at room temperature for 30 min, then at 50 °C for 60 h. After completion, purification by flash chromatography on silica gel (petroleum ether/DCM/EtOAc = 5/1/1) to give product **11g**: 35.7 mg, as a faint red oil, 86% yield; >19:1 *E/Z*; [α]<sup>25</sup><sub>D</sub> = +47.2 (*c* = 0.55, in CHCl<sub>3</sub>); 86% ee, determined by

HPLC analysis [Chiralpak column IB, *i*PrOH/*n*Hexane = 10/90, flow rate: 1.0 mL/min, 254 nm, *t* (major) = 17.40 min, *t* (minor) = 19.34 min]; <sup>1</sup>H NMR (400 MHz, CDCl<sub>3</sub>): δ (ppm) 9.11 (s, 1H), 7.50 (dd, *J* = 5.0, 1.5 Hz, 1H), 7.45–7.37 (m, 2H), 7.32–7.23 (m, 4H), 7.19–7.11 (m, 2H), 6.93 (dd, *J* = 5.0, 3.7 Hz, 1H), 6.34 (t, *J* = 3.1 Hz, 1H), 5.92 (d, *J* = 15.8 Hz, 1H), 5.82–5.76 (m, 2H), 5.68 (dd, *J* = 8.3, 3.7 Hz, 1H), 4.24–4.03 (m, 2H), 1.33–1.21 (m, 3H); <sup>13</sup>C NMR (150 MHz, CDCl<sub>3</sub>): δ (ppm) 168.0, 140.7, 138.1, 135.1, 134.1, 132.7, 132.3, 129.0, 128.8, 128.4, 127.3, 127.2, 114.9, 111.4, 110.7, 60.6, 56.0, 14.3; HRMS (ESI-TOF) *m/z*: [M + Na]<sup>+</sup> Calcd for C<sub>20</sub>H<sub>20</sub>N<sub>2</sub>O<sub>4</sub>S<sub>2</sub>Na<sup>+</sup> 439.0757; Found 439.0760.

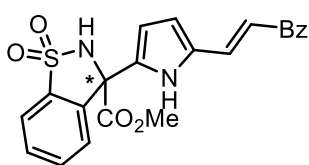

**Methyl (*E*)-3-(5-(3-oxo-3-phenylprop-1-en-1-yl)-1*H*-pyrrol-2-yl)-2,3-dihydrobenzo[*d*]isothiazole-3-carboxylate 1,1-dioxide (**11h**):** An oven-dried 10 mL test-tube equipped with a septum and a magnetic stir bar was

charged with 2-alkenyl pyrrole **10a** (23.6 mg, 0.120 mmol, 1.2 equiv), *N*-sulfonylimine **8r** (22.5 mg, 0.0999 mmol, 1.0 equiv), Pd<sub>2</sub>(dba)<sub>3</sub> (4.6 mg, 0.0050 mmol, 5 mol%), ligand **L6** (7.6 mg, 0.010 mmol, 10 mol%), **A1** (1.8 mg, 0.010 mmol, 10 mol%) and 4 Å MS (40.0 mg). The tube was then evacuated and filled with argon. This cycle was repeated three times and toluene (1.0 mL) was added via syringe. The resulting solution was stirred at room temperature for 30 min, then at 50 °C for 48 h. After completion, purification by flash chromatography on silica gel (petroleum ether/EtOAc = 10/1–4/1) to give product **11h**: 35.8 mg, as a yellow oil, 85% yield; *E/Z* = 12:1; [α]<sub>D</sub><sup>25</sup> = +151.1 (*c* = 0.4, in CHCl<sub>3</sub>); 83% ee, determined by HPLC analysis [Chiralpak column IA, *i*PrOH/*n*Hexane = 40/60, flow rate: 1.0 mL/min, 254 nm, *t* (major) = 17.05 min, *t* (minor) = 29.71 min]; <sup>1</sup>H NMR (400 MHz, CDCl<sub>3</sub>): δ (ppm) 9.49 (s, 1H), 7.95–7.89 (m, 2H), 7.86 (d, *J* = 8.0 Hz, 1H), 7.81–7.75 (m, 1H), 7.73–7.64 (m, 1H), 7.64–7.56 (m, 2H), 7.54–7.48 (m, 1H), 7.44–7.37 (m, 2H), 7.12 (d, *J* = 15.6 Hz, 1H), 6.55 (dd, *J* = 3.8, 2.7 Hz, 1H), 6.42 (dd, *J* = 3.8, 2.4 Hz, 2H), 3.95 (s, 3H); <sup>13</sup>C NMR (100 MHz, CDCl<sub>3</sub>): δ (ppm) 189.9, 168.0, 138.3, 136.5, 134.0, 133.9, 133.6, 132.5, 132.1, 130.9, 130.2, 128.5, 128.3, 126.4, 121.3, 116.9, 116.1, 110.1, 66.6, 54.8; HRMS (ESI-TOF) *m/z*: [M + Na]<sup>+</sup> Calcd for C<sub>22</sub>H<sub>18</sub>N<sub>2</sub>O<sub>5</sub>SNa<sup>+</sup> 445.0829; Found 445.0820.

## 12. General procedure for the asymmetric Friedel–Crafts reaction of 2-alkenyl furan **12** with 1-azadiene **13**

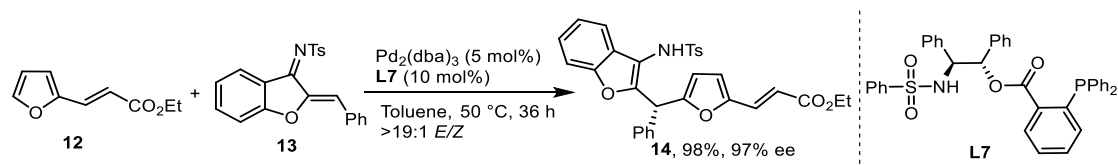

**Ethyl (*S,E*)-3-(5-((3-((4-methylphenyl)sulfonamido)benzofuran-2-yl)(phenyl)methyl)furan-2-yl)acrylate (**14**):** An oven-dried 10 mL test-tube equipped with a septum and a magnetic stir bar was charged with 2-alkenyl furan **12** (33.2 mg, 0.200 mmol, 2.0 equiv), aza-diene **13** (37.5 mg, 0.0998 mmol, 1.0 equiv), Pd<sub>2</sub>(dba)<sub>3</sub> (4.6 mg, 0.0050 mmol, 5 mol%) and ligand **L7** (6.4 mg, 0.010 mmol, 10 mol%). The tube was then evacuated and filled with argon. This cycle was repeated three times and toluene (0.5 mL) was added via syringe. Then the resulting mixture was stirred at 50 °C for 36 h. After completion, purification by flash chromatography on silica gel (petroleum ether/EtOAc = 10/1–6/1) to give product **14**: 53.4 mg, as a yellow semisolid, 98% yield; >19:1 *E/Z*; [ $\alpha$ ]<sub>D</sub><sup>25</sup> = +29.1 (*c* = 0.35, in CHCl<sub>3</sub>); 97% ee, determined by HPLC analysis [Chiralpak column ID, *i*PrOH/*n*Hexane = 40/60, flow rate: 1.0 mL/min, 254 nm, *t* (minor) = 9.95 min, *t* (major) = 16.76 min]; <sup>1</sup>H NMR (400 MHz, CDCl<sub>3</sub>):  $\delta$  (ppm) 7.62 (d, *J* = 8.3 Hz, 2H), 7.37 (d, *J* = 8.3 Hz, 1H), 7.33 (d, *J* = 15.8 Hz, 1H), 7.28–7.25 (m, 2H), 7.25–7.20 (m, 4H), 7.20–7.15 (m, 1H), 7.11–7.07 (m, 3H), 6.75 (s, 1H), 6.48 (d, *J* = 3.4 Hz, 1H), 6.17 (d, *J* = 15.8 Hz, 1H), 6.12 (d, *J* = 3.4 Hz, 1H), 5.62 (s, 1H), 4.20 (q, *J* = 7.1 Hz, 2H), 2.30 (s, 3H), 1.28 (t, *J* = 7.1 Hz, 3H); <sup>13</sup>C NMR (100 MHz, CDCl<sub>3</sub>):  $\delta$  (ppm) 167.1, 155.6, 153.4, 152.5, 150.4, 144.0, 137.3, 136.1, 130.8, 129.6, 128.6, 128.4, 127.5, 127.4, 125.5, 124.7, 123.2, 119.3, 115.6, 115.4, 113.9, 111.6, 110.9, 60.4, 41.9, 21.5, 14.2; HRMS (ESI-TOF) *m/z*: [M + Na]<sup>+</sup> Calcd for C<sub>31</sub>H<sub>27</sub>NO<sub>6</sub>SNa<sup>+</sup> 564.1452; Found 564.1444.

### 13. Asymmetric reaction on a 1.0 mmol scale

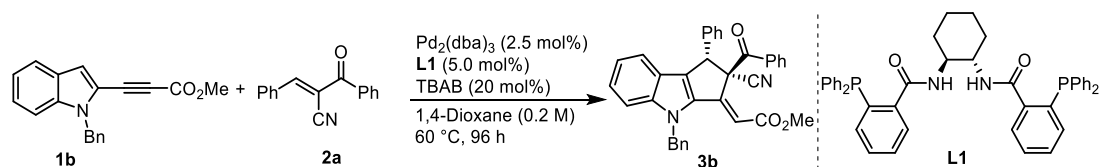

An oven-dried 50 mL Schlenk tube equipped with a magnetic stir bar was charged with 2-indolyl propiolate **1b** (289 mg, 1.00 mmol, 1.0 equiv), enone **2a** (303 mg, 1.30 mmol, 1.3 equiv), Pd<sub>2</sub>(dba)<sub>3</sub> (22.9 mg, 0.0250 mmol, 2.5 mol%), ligand **L1** (34.5 mg, 0.0499 mmol, 5 mol%) and TBAB (64.0 mg, 0.200 mmol, 20 mol%). The tube was then evacuated and filled with argon. This cycle was repeated three times and degassed 1,4-dioxane (5.0 mL) was added via syringe. The resulting solution

was stirred at room temperature for 30 min, then at 60 °C for 96 h. After completion, purification by flash chromatography on silica gel (petroleum ether/EtOAc = 10/1–8/1) to give product **3b**: 454.1 mg, as a yellow solid, 87% yield; 92% ee; >19:1 dr; >19:1 *E/Z*.

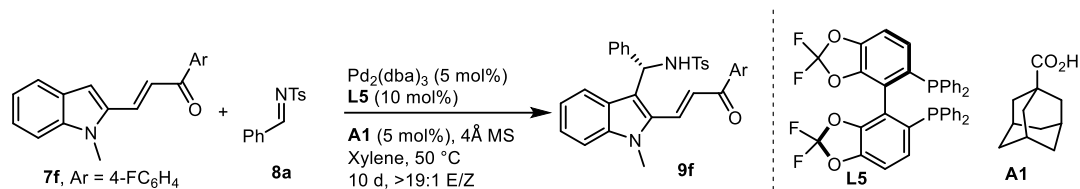

An oven-dried 50 mL test-tube equipped with a septum and a magnetic stir bar was charged with 2-alkenyl indole **7f** (279 mg, 0.999 mmol, 1.0 equiv), *N*-sulfonylimine **8a** (518 mg, 2.00 mmol, 2.0 equiv), Pd<sub>2</sub>(dba)<sub>3</sub> (45.8 mg, 0.0500 mmol, 5 mol%), ligand **L5** (68.2 mg, 0.100 mmol, 10 mol%), **A1** (9.0 mg, 0.050 mmol, 5 mol%) and 4 Å MS (400 mg). The tube was then evacuated and filled with argon. This cycle was repeated three times and xylene (10 mL) was added via syringe. The resulting solution was stirred at room temperature for 30 min, then at 50 °C for 10 d. After completion, Et<sub>2</sub>O (10 mL) was added and the mixture was stirred 30 min at 0 °C. The precipitates were filtered and washed with cold Et<sub>2</sub>O (3 × 5 mL). The cake was collected and dissolved in DCM. The mixture was filtered again, and washed with DCM (5 × 5 mL). The filtrate was concentrated to give product **9f**: 516.0 mg, as a yellow solid, 96% yield; 96% ee; >19:1 *E/Z*.

#### 14. Transformations of products

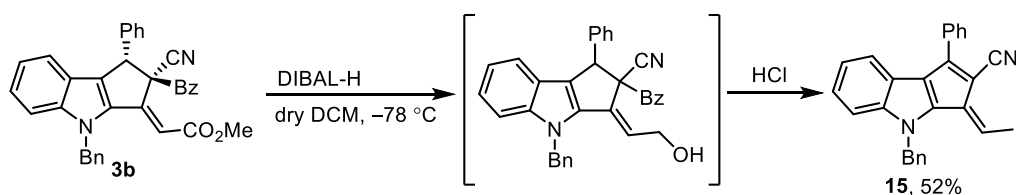

To a solution of compound **3b** (52.2 mg, 0.0998 mmol, 1.0 equiv) in dry DCM, 1.0 M DIBAL-H (0.5 mL, 0.5 mmol, 5.0 equiv) was added drop wise at –78 °C under argon atmosphere, and the mixture was stirred for 12 h. Then the solution was warmed to room temperature, quenched with aqueous HCl (1M, 2 mL) and stirred at rt for 30 min. The mixture was extracted with DCM (3 × 2 mL), and the combined organic layers were dried over anhydrous Na<sub>2</sub>SO<sub>4</sub>. After concentration, the residue was purified by column chromatography (petroleum ether/EtOAc = 10/1) to give product **15**: 19.4 mg, as a red semisolid, 52% yield; >19:1 *E/Z*; <sup>1</sup>H NMR (400 MHz, CDCl<sub>3</sub>): δ (ppm) 7.94–7.88 (m, 2H), 7.61 (dd, *J* = 7.5, 1.3 Hz, 1H), 7.51 (dd, *J* = 8.3, 6.5 Hz, 2H), 7.47–7.42 (m, 1H), 7.29–7.21 (m, 4H), 7.17–7.12 (m, 1H), 7.09 (ddd, *J* = 8.1, 7.1, 1.1 Hz, 1H), 7.05–7.00 (m, 2H), 6.64 (q, *J* = 7.7

Hz, 1H), 5.43 (s, 2H), 2.39 (d,  $J = 7.7$  Hz, 3H);  $^{13}\text{C NMR}$  (100 MHz,  $\text{CDCl}_3$ ):  $\delta$  (ppm) 156.2, 142.9, 141.7, 136.6, 135.4, 133.3, 131.5, 130.0, 129.1, 128.8, 128.7, 127.9, 125.9, 122.9, 121.6, 121.5, 120.1, 119.9, 119.8, 110.4, 92.6, 48.1, 15.5; **HRMS** (ESI-TOF)  $m/z$ :  $[\text{M} + \text{Na}]^+$  Calcd for  $\text{C}_{27}\text{H}_{20}\text{N}_2\text{Na}^+$  395.1519; Found 395.1526.

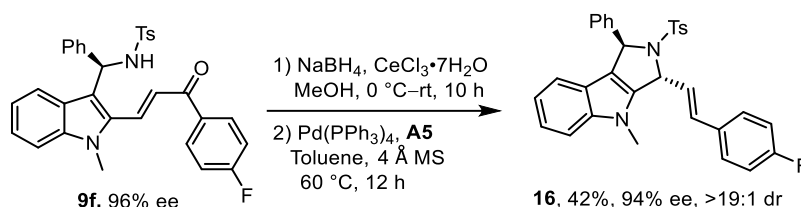

To a solution of **9f** (53.8 mg, 0.0999 mmol, 1.0 equiv) in MeOH (1.0 mL) was added  $\text{CeCl}_3 \cdot 7\text{H}_2\text{O}$  (149.1 mg, 0.4002 mmol, 4.0 equiv), and  $\text{NaBH}_4$  (15.1 mg, 0.399 mmol, 4.0 equiv) was added slowly in two batches. The mixture was stirred at rt for 10 h. After completion (monitored by TLC analysis), it was quenched with water (3 mL). Then MeOH was evaporated under reduced pressure and the resulting aqueous phase was extracted with DCM ( $3 \times 5$  mL). The combined organic layers were dried ( $\text{Na}_2\text{SO}_4$ ) and evaporated. The crude product was purified by flash chromatography on silica gel (petroleum ether/EtOAc = 6/1–3/1) to give allyl alcohol product (48.9 mg, 94% yield). Then an oven-dried 10 mL Schlenk tube equipped with a magnetic stir bar was charged with the allyl alcohol product (40.5 mg, 0.0750 mmol, 1.0 equiv),  $\text{Pd}(\text{PPh}_3)_4$  (8.7 mg, 0.0075 mmol, 10 mol%), **A5** (3.7 mg, 0.015 mmol, 20 mol%) and 4 Å MS (60.0 mg). The tube was then evacuated and filled with argon. This cycle was repeated three times, and degassed toluene (1.0 mL) was added via syringe. The resulting mixture was stirred at  $60\text{ }^\circ\text{C}$  for 12 h. After completion, the mixture was purified by flash chromatography on silica gel (petroleum ether/EtOAc = 10/1–6/1) to give product **16**: 21.9 mg, as a yellow solid, 42% overall yield; >19:1 dr; >19:1 *E/Z*; mp  $101\text{--}102\text{ }^\circ\text{C}$ ;  $[\alpha]_D^{25} = +11.6$  ( $c = 0.25$ , in  $\text{CHCl}_3$ ); 94% ee, determined by HPLC analysis [Chiralpak column IB, *i*PrOH/*n*Hexane = 40/60, flow rate: 1.0 mL/min, 254 nm,  $t$  (minor) = 5.66 min,  $t$  (major) = 6.33 min];  $^1\text{H NMR}$  (400 MHz,  $\text{CDCl}_3$ ):  $\delta$  (ppm) 7.41 (d,  $J = 8.3$  Hz, 2H), 7.34–7.29 (m, 2H), 7.29–7.26 (m, 2H), 7.25–7.20 (m, 4H), 7.14 (ddd,  $J = 8.3, 6.9, 1.2$  Hz, 1H), 7.09–7.04 (m, 1H), 7.04–6.93 (m, 5H), 6.77 (d,  $J = 14.8$  Hz, 1H), 6.18 (d,  $J = 3.4$  Hz, 1H), 5.96–5.88 (m, 2H), 3.62 (s, 3H), 2.31 (s, 3H);  $^{13}\text{C NMR}$  (100 MHz,  $\text{CDCl}_3$ ):  $\delta$  (ppm) 162.7 (d,  $J = 246.7$  Hz), 142.5, 141.4, 141.2, 138.8, 137.8, 132.2, 131.9 (d,  $J = 3.4$  Hz), 129.0, 128.4 (d,  $J = 8.1$  Hz), 128.2, 127.6, 127.5, 127.45 (d,  $J = 3.2$  Hz), 127.41, 121.8, 121.6, 120.1, 118.6, 116.8, 115.6 (d,  $J = 21.6$  Hz), 109.7, 66.1, 63.6, 30.5, 21.4;  $^{19}\text{F NMR}$  (376 MHz,  $\text{CDCl}_3$ ):  $\delta$  (ppm)

-113.08; **HRMS** (ESI-TOF)  $m/z$ :  $[M + Na]^+$  Calcd for  $C_{32}H_{27}FN_2O_2SNa^+$  545.1670; Found 545.1679.

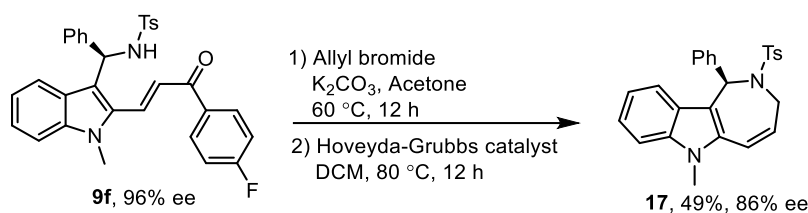

To a solution of **9f** (107.7 mg, 0.1999 mmol, 1.0 equiv) in acetone (1.0 mL) was added  $K_2CO_3$  (110.4 mg, 0.7988 mmol, 4.0 equiv) and 3-bromopropylene (69  $\mu$ L, 0.80 mmol, 4.0 equiv). The mixture was stirred at 60 °C for 12 h. After completion (determined by TLC analysis), solvent was evaporated under reduced pressure and the crude product was purified by flash chromatography on silica gel (petroleum ether/EtOAc = 6/1) to give product (104.2 mg, 0.1800 mmol, 90% yield). Then an oven-dried 10 mL Schlenk tube equipped with a magnetic stir bar was charged with the *N*-allyl product (57.8 mg, 0.100 mmol, 1.0 equiv) and Hoveyda-Grubbs catalyst (3.2 mg, 0.0050 mmol, 5 mol%). The tube was then evacuated and filled with argon. This cycle was repeated three times, and degassed dried DCM (1.0 mL) was added via syringe. The resulting mixture was stirred at 80 °C for 12 h. After completion, the mixture was purified by flash chromatography on silica gel (petroleum ether/DCM/EtOAc = 30/30/1) to give product **17**: 23.3 mg, as a yellow solid, 49% overall yield; mp 59–61 °C;  $[\alpha]_D^{25} = +114.9$  ( $c = 0.35$ , in  $CHCl_3$ ); 86% ee, determined by HPLC analysis [Chiralpak column IA, *i*PrOH/*n*Hexane = 20/80, flow rate: 1.0 mL/min, 254 nm,  $t$  (major) = 7.83 min,  $t$  (minor) = 9.86 min]; **<sup>1</sup>H NMR** (400 MHz,  $CDCl_3$ ):  $\delta$  (ppm) 7.35 (d,  $J = 7.9$  Hz, 1H), 7.31–7.18 (m, 9H), 7.09–7.01 (m, 1H), 6.82 (s, 1H), 6.72 (d,  $J = 8.1$  Hz, 2H), 6.12 (dd,  $J = 12.0, 2.8$  Hz, 1H), 5.59 (ddd,  $J = 12.0, 5.8, 2.7$  Hz, 1H), 4.50 (ddd,  $J = 19.9, 5.9, 1.9$  Hz, 1H), 3.70–3.60 (m, 1H), 3.41 (s, 3H), 2.24 (s, 3H); **<sup>13</sup>C NMR** (100 MHz,  $CDCl_3$ ):  $\delta$  (ppm) 142.2, 140.0, 137.0, 136.7, 133.5, 128.7, 128.6, 128.1, 127.8, 127.7, 127.5, 126.7, 122.6, 120.0, 118.4, 118.4, 113.2, 109.0, 57.6, 44.8, 29.1, 21.3; **HRMS** (ESI-TOF)  $m/z$ :  $[M + Na]^+$  Calcd for  $C_{26}H_{24}N_2O_2SNa^+$  451.1451; Found 451.1454.

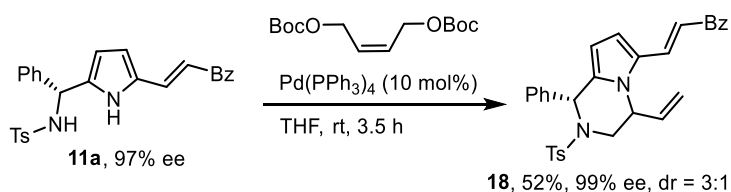

An oven-dried 10 mL Schlenk tube equipped with a magnetic stir bar was charged with **11a** (45.6 mg, 0.0998 mmol, 1.0 equiv), (*Z*)-but-2-ene-1,4-diyl di-tert-butyl bis(carbonate) (43.2 mg, 0.150



mmol, 1.5 equiv) and Pd(PPh<sub>3</sub>)<sub>4</sub> (11.5 mg, 0.0100 mmol, 10 mol%). The tube was then evacuated and filled with argon. This cycle was repeated three times and degassed THF (1.0 mL) was added via syringe. The resulting mixture was stirred at rt for 3.5 h. After completion, the mixture was concentrated and purified by flash chromatography on silica gel (petroleum ether/DCM/EtOAc = 20/10/1) to give product **18**: 26.4 mg, as a yellow oil, 52% yield; 3:1 dr; [ $\alpha$ ]<sub>D</sub><sup>25</sup> = +8.6 (*c* = 0.73, in CHCl<sub>3</sub>); 99% ee, determined by HPLC analysis [Chiralpak column IB, *i*PrOH/*n*Hexane = 40/60, flow rate: 1.0 mL/min, 254 nm, *t* (major) = 5.35 min, *t* (minor) = 5.69 min]; **<sup>1</sup>H NMR** (400 MHz, CDCl<sub>3</sub>):  $\delta$  (ppm) 7.98 (d, *J* = 7.1 Hz, 2H), 7.76 (d, *J* = 8.0 Hz, 2H), 7.58–7.50 (m, 3H), 7.37–7.33 (m, 2H), 7.33–7.28 (m, 6H), 7.20 (d, *J* = 16.2 Hz, 1H), 6.63 (d, *J* = 5.0 Hz, 1H), 6.42 (d, *J* = 5.0 Hz, 1H), 4.99 (dd, *J* = 9.7, 7.7 Hz, 1H), 4.94–4.84 (m, 2H), 4.70 (s, 1H), 4.11–4.03 (m, 1H), 3.67 (dd, *J* = 10.9, 8.7 Hz, 1H), 3.54–3.42 (m, 1H), 2.42 (s, 3H); **<sup>13</sup>C NMR** (150 MHz, CDCl<sub>3</sub>):  $\delta$  (ppm) 190.4, 169.3, 152.7, 143.6, 141.4, 137.2, 137.1, 133.4, 131.0, 130.2, 129.3, 128.8, 128.7, 128.4, 128.1, 127.8, 127.0, 126.97, 126.93, 119.4, 94.1, 69.1, 53.1, 47.0, 21.5; **HRMS** (ESI-TOF) *m/z*: [M + Na]<sup>+</sup> Calcd for C<sub>31</sub>H<sub>28</sub>N<sub>2</sub>O<sub>3</sub>SNa<sup>+</sup> 531.1713; Found 531.1723.

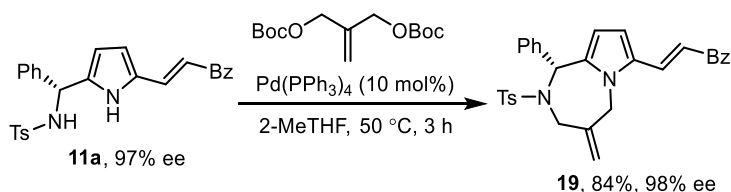

An oven-dried 10 mL Schlenk tube equipped with a magnetic stir bar was charged with **11a** (45.6 mg, 0.0998 mmol, 1.0 equiv), di-tert-butyl (2-methylenepropane-1,3-diyl) bis(carbonate) (43.2 mg, 0.150 mmol, 1.5 equiv) and Pd(PPh<sub>3</sub>)<sub>4</sub> (11.5 mg, 0.0100 mmol, 10 mol%). The tube was then evacuated and filled with argon. This cycle was repeated three times and degassed 2-MeTHF (1.0 mL) was added via syringe. The resulting mixture was stirred at 50 °C for 3 h. After completion, the mixture was concentrated and then purified by flash chromatography on silica gel (petroleum ether/EtOAc = 10/1) to give product **19**: 42.7 mg, as a yellow oil, 84% yield; [ $\alpha$ ]<sub>D</sub><sup>25</sup> = +241.1 (*c* = 0.75, in CHCl<sub>3</sub>); 98% ee, determined by HPLC analysis [Chiralpak column IF, *i*PrOH/*n*Hexane = 40/60, flow rate: 1.0 mL/min, 254 nm, *t* (major) = 15.08 min, *t* (minor) = 21.54 min]; **<sup>1</sup>H NMR** (400 MHz, CDCl<sub>3</sub>):  $\delta$  (ppm) 8.01 (d, *J* = 7.2 Hz, 2H), 7.71 (d, *J* = 15.0 Hz, 1H), 7.59–7.54 (m, 1H), 7.54–7.44 (m, 4H), 7.36–7.25 (m, 4H), 7.19–7.14 (m, 2H), 7.11 (d, *J* = 8.0 Hz, 2H), 6.79 (d, *J* = 3.9 Hz, 1H), 6.55 (s, 1H), 6.05 (d, *J* = 3.7 Hz, 1H), 4.98 (s, 1H), 4.82 (s, 1H), 4.33 (d, *J* = 14.5 Hz, 1H), 4.29 (d, *J* = 16.5 Hz, 1H), 4.19 (d, *J* = 14.4 Hz, 1H), 3.80 (d, *J* = 15.5 Hz, 1H), 2.33 (s, 3H); **<sup>13</sup>C NMR**

(100 MHz, CDCl<sub>3</sub>):  $\delta$  (ppm) 189.4, 143.4, 138.5, 137.5, 137.4, 136.6, 135.0, 132.6, 131.5, 130.7, 129.3, 128.62, 128.56, 128.2, 127.9, 127.5, 127.3, 119.0, 117.4, 113.0, 111.2, 58.4, 50.0, 49.0, 21.4; **HRMS** (ESI-TOF)  $m/z$ :  $[M + Na]^+$  Calcd for C<sub>31</sub>H<sub>28</sub>N<sub>2</sub>O<sub>3</sub>SNa<sup>+</sup> 531.1713; Found 531.1705.

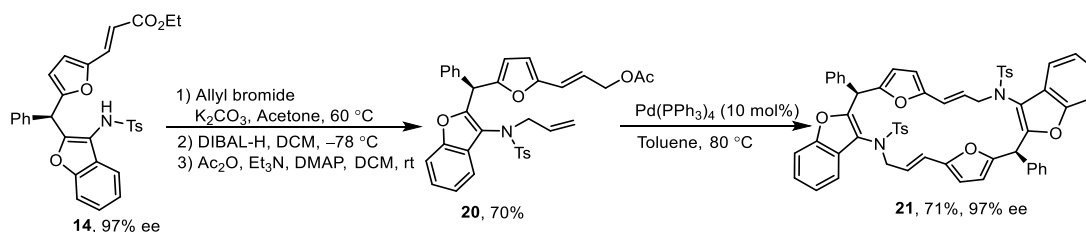

To a solution of **14** (108.3 mg, 0.1999 mmol, 1.0 equiv) in acetone (1.0 mL) was added K<sub>2</sub>CO<sub>3</sub> (110.4 mg, 0.7988 mmol, 4.0 equiv) and 3-bromopropylene (69  $\mu$ L, 0.80 mmol, 4.0 equiv). The mixture was stirred at 60 °C for 12 h. After completion (determined by TLC analysis), the solvent was evaporated under reduced pressure and the crude product was purified by flash chromatography on silica gel (petroleum ether/EtOAc = 10/1) to give product (101.4 mg, 0.1743 mmol, 87% yield). Diisobutylaluminium hydride (348  $\mu$ L of a 1.0 M solution in cyclohexane, 0.348 mmol, 2.0 equiv) was added dropwise to a solution of the above product (101.4 mg, 0.1743 mmol, 1.0 equiv) in anhydrous DCM (2.0 mL) under Ar at -78 °C over 10 min and the mixture was stirred for 2 h. After completion, the mixture was quenched with aqueous NH<sub>4</sub>Cl. The mixture was allowed to warm to rt and stirred for 1 h. The layers were separated and the aqueous layer was extracted with DCM (3  $\times$  5 mL), dried over Na<sub>2</sub>SO<sub>4</sub>, filtered and concentrated under reduced pressure to give the crude allylic alcohol. To a solution of the allylic alcohol and DMAP (2.1 mg, 0.017 mmol, 10 mol%) in DCM (1.0 mL), acetic anhydride (33  $\mu$ L, 0.35 mmol, 2.0 equiv) and Et<sub>3</sub>N (45  $\mu$ L, 0.35 mmol, 2.0 equiv) was added and the reaction mixture was stirred at rt. After completion, the mixture was purified by flash chromatography on silica gel (petroleum ether/ EtOAc = 10/1) to give allyl acetates product **20**: 81.2 mg, as a yellow oil, 70% yield, over 3 steps; **<sup>1</sup>H NMR** (400 MHz, CDCl<sub>3</sub>):  $\delta$  (ppm) (d,  $J$  = 8.0 Hz, 2H), 7.40–7.18 (m, 6H), 7.11–6.99 (m, 3H), 6.97–6.79 (m, 1H), 6.73–6.37 (m, 1H), 6.30 (d,  $J$  = 14.6 Hz, 1H), 6.18–5.91 (m, 3H), 5.83–5.38 (m, 2H), 4.89–4.65 (m, 2H), 4.57 (d,  $J$  = 6.4 Hz, 2H), 4.48–4.15 (m, 1H), 4.03–3.84 (m, 1H), 2.31 (s, 3H), 1.99 (s, 3H); **<sup>13</sup>C NMR** (100 MHz, CDCl<sub>3</sub>):  $\delta$  (ppm) 170.8, 155.9, 153.6, 153.5, 151.3, 143.8, 137.7, 136.4, 132.6, 129.6, 128.9, 128.5, 128.3, 127.7, 127.2, 124.6, 124.2, 122.7, 122.0, 121.2, 119.3, 116.8, 112.0, 109.9, 109.7, 64.6, 53.5, 41.7, 21.5, 20.9; **HRMS** (ESI-TOF)  $m/z$ :  $[M + Na]^+$  Calcd for C<sub>34</sub>H<sub>31</sub>NO<sub>6</sub>SNa<sup>+</sup> 604.1765; Found 604.1756.

An oven-dried 10 mL Schlenk tube equipped with a magnetic stir bar was charged with **20** (58.1

mg, 0.0998 mmol) and Pd(PPh<sub>3</sub>)<sub>4</sub> (11.5 mg, 0.0100 mmol, 10 mol%). The tube was then evacuated and filled with argon. This cycle was repeated three times and degassed toluene (1.0 mL) was added via syringe. The mixture was stirred at 80 °C for 15 h. After completion, the mixture was purified by flash chromatography on silica gel (petroleum ether/EtOAc = 10/1–6/1) to give product **21**: 34.0 mg, as a yellow solid, 71% yield; mp 155–157 °C; [ $\alpha$ ]<sub>D</sub><sup>25</sup> = –44.0 (*c* = 0.25, in CHCl<sub>3</sub>); 97% ee, determined by HPLC analysis [Chiralpak column ID, *i*PrOH/*n*Hexane = 40/60, flow rate: 1.0 mL/min, 254 nm, *t* (major) = 28.51 min, *t* (minor) = 35.14 min]; **<sup>1</sup>H NMR** (400 MHz, CDCl<sub>3</sub>):  $\delta$  (ppm) 7.70 (d, *J* = 8.0 Hz, 4H), 7.46–7.37 (m, 6H), 7.32–7.27 (m, 4H), 7.27–7.17 (m, 8H), 7.03–6.96 (m, 2H), 6.58 (d, *J* = 8.0 Hz, 2H), 6.11 (ddd, *J* = 15.4, 10.4, 4.9 Hz, 2H), 5.98 (d, *J* = 3.3 Hz, 2H), 5.79 (s, 2H), 5.68–5.57 (m, 4H), 4.79 (dd, *J* = 14.2, 4.9 Hz, 2H), 3.49 (dd, *J* = 14.2, 10.4 Hz, 2H), 2.43 (s, 6H); **<sup>13</sup>C NMR** (150 MHz, CDCl<sub>3</sub>):  $\delta$  (ppm) 156.8, 153.9, 153.7, 150.3, 143.9, 138.3, 137.2, 129.8, 128.8, 128.4, 127.8, 127.1, 124.4, 124.2, 123.0, 122.8, 121.0, 119.0, 116.3, 112.1, 110.0, 109.0, 53.0, 41.6, 21.6; **HRMS** (ESI-TOF) *m/z*: [M + Na]<sup>+</sup> Calcd for C<sub>58</sub>H<sub>46</sub>N<sub>2</sub>O<sub>8</sub>S<sub>2</sub>Na<sup>+</sup> 985.2588; Found 985.2590.

## 15. More investigation on substrates scope

### 1) Other aromatic compounds

Benzofuran derivative **22** was applied to the reaction with **5a** under the standard conditions, but it did not work. When the reaction was carried out under the catalysis of  $\text{Pd}(\text{PPh}_3)_4$ , **24** was obtained instead of desired **23**. The control experiment indicated that the reaction was catalyzed by  $\text{PPh}_3$  via a Rauhut–Currier pathway, followed by annulation to give the formal [4+2] adduct. Similar phenomenon was observed for substrates **25–28**.

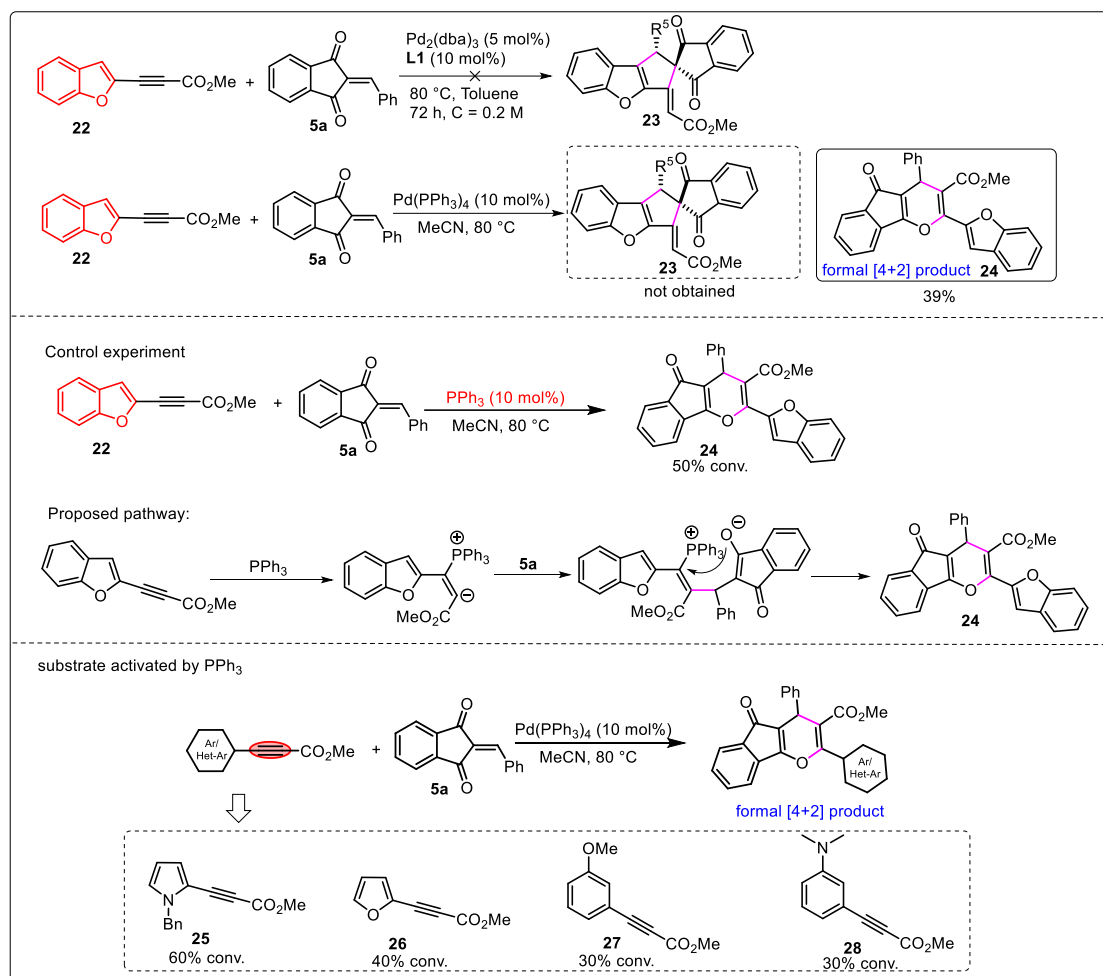

Since the electron-deficient alkynes mentioned above were activated by  $\text{PPh}_3$  rather than Pd, some electron-neutral alkyne derivatives were tested. However, compounds **29–32** were inert in the reaction.

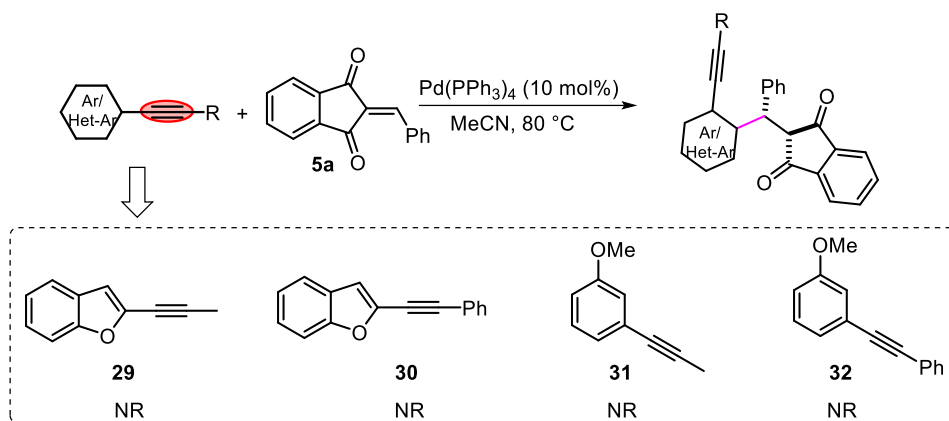

## 2) Other electrophiles

Imine **8a** was investigated with 2-alkyne indole **1a** or **1a''** under the catalysis of palladium.

Unfortunately, those substrates did not undergo the desired FC addition reaction.

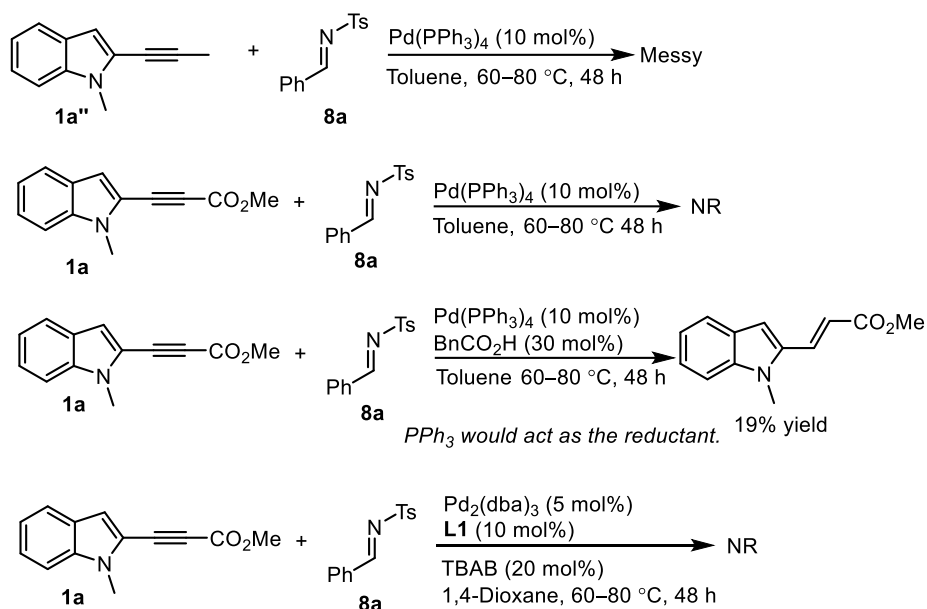

Some other electrophiles, including carbonyls, ketimines and Michael acceptors, were investigated with 2-alkenyl indole **7a** under the catalysis of  $\text{Pd}(\text{PPh}_3)_4$ . It was found that most carbonyls and imines listed as below were not reactive. In addition, some compounds, such as **33**, Micheal acceptor **2a** and **13**, could undergo the reaction with **7a** in the absence of  $\text{Pd}^0$  (background reaction).

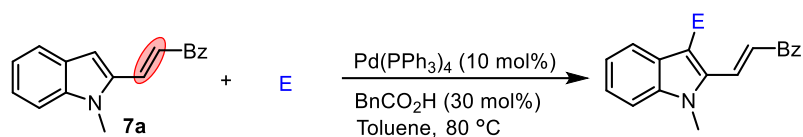

#### Aldehyde and ketone

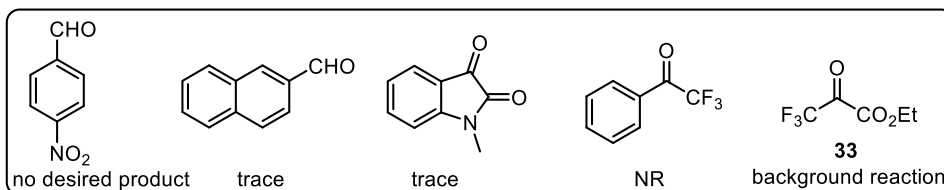

#### Ketimine

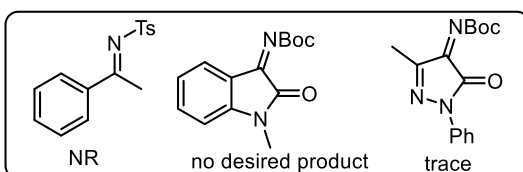

#### Micheal acceptor

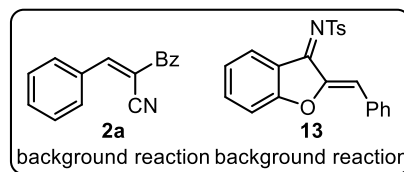

### 3) Other styrene-type substrates

Considering that the aromatic rings are activated by Pd<sup>0</sup> which coordinates to the conjugated unsaturated bond as a  $\pi$ -Lewis base, we applied more styrene-type substrates to the reaction. However, most of the aromatic compounds were inert, probably due to some steric and electronic effects.

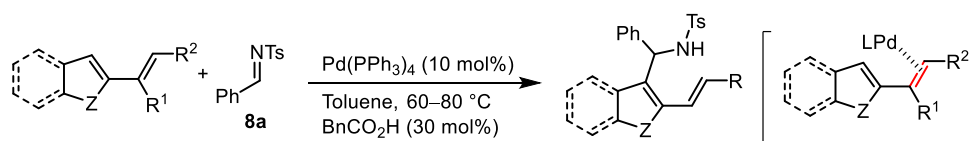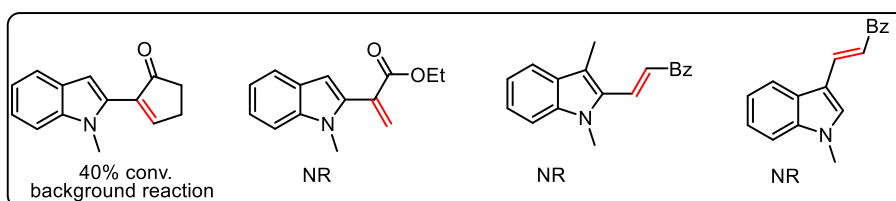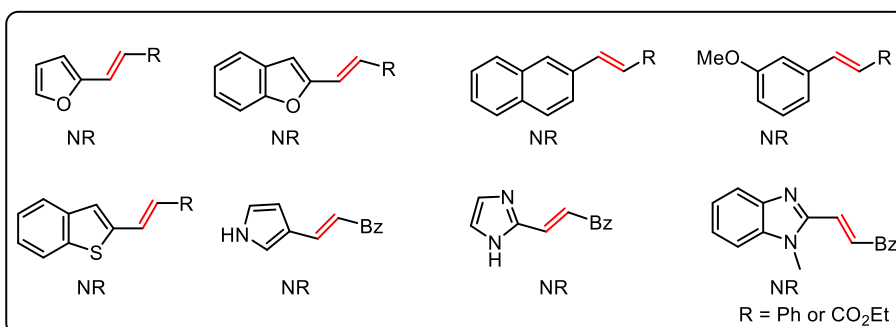

## 16. X-ray crystallographic data and structural refinement

### (1) Crystal data and structural refinement for **3i**

Procedure for the recrystallisation of **3i**: To a 10 mL tube containing **3i** (20.0 mg) were added CHCl<sub>3</sub> (1.0 mL) and Et<sub>2</sub>O (2.0 mL). The mixture was heated until a clear solution was formed, which was kept aside and sealed by a piece of weighing paper with a tiny hole at room temperature to obtain crystals. The crystals were subjected for single crystal XRD to determine the absolute configuration of enantiopure **3i**. The data were collected by a Bruker APEX-II CCD diffractometer equipped with a Cu radiation source ( $K\alpha = 1.54178 \text{ \AA}$ ) at 273.15 K. CCDC 2251805 (**3i**) contains the supplementary crystallographic data for this paper. These data can be obtained free of charge via [www.ccdc.cam.ac.uk/data\\_request/cif](http://www.ccdc.cam.ac.uk/data_request/cif).

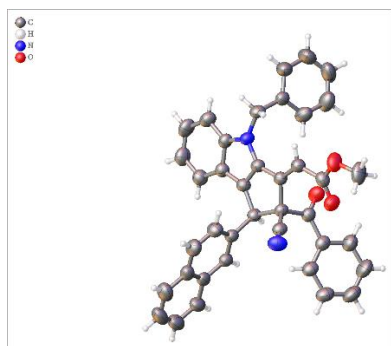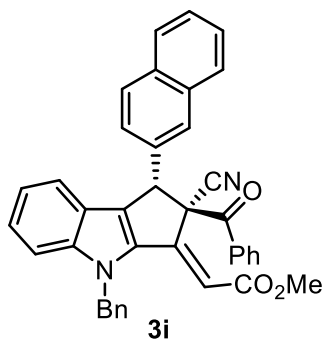

(ellipsoid contour probability 50%)

|                                  |                                                               |
|----------------------------------|---------------------------------------------------------------|
| Identification code              | <b>3i</b>                                                     |
| Empirical formula                | C <sub>39</sub> H <sub>28</sub> N <sub>2</sub> O <sub>3</sub> |
| Formula weight                   | 572.63                                                        |
| Temperature/K                    | 273.15                                                        |
| Crystal system                   | monoclinic                                                    |
| Space group                      | P2 <sub>1</sub>                                               |
| a/Å                              | 11.1245(4)                                                    |
| b/Å                              | 10.5529(3)                                                    |
| c/Å                              | 13.5415(5)                                                    |
| $\alpha$ /°                      | 90                                                            |
| $\beta$ /°                       | 107.914(2)                                                    |
| $\gamma$ /°                      | 90                                                            |
| Volume/Å <sup>3</sup>            | 1512.64(9)                                                    |
| Z                                | 2                                                             |
| $\rho_{\text{calc}}/\text{cm}^3$ | 1.257                                                         |
| $\mu/\text{mm}^{-1}$             | 0.632                                                         |
| F(000)                           | 600.0                                                         |
| Crystal size/mm <sup>3</sup>     | 0.27 × 0.19 × 0.04                                            |

|                                                  |                                                                    |
|--------------------------------------------------|--------------------------------------------------------------------|
| Radiation                                        | CuK $\alpha$ ( $\lambda = 1.54178$ )                               |
| 2 $\theta$ range for data collection/ $^{\circ}$ | 6.86 to 126.98                                                     |
| Index ranges                                     | $-12 \leq h \leq 12$ , $-11 \leq k \leq 12$ , $-14 \leq l \leq 15$ |
| Reflections collected                            | 15015                                                              |
| Independent reflections                          | 4840 [ $R_{\text{int}} = 0.0439$ , $R_{\text{sigma}} = 0.0359$ ]   |
| Data/restraints/parameters                       | 4840/1/398                                                         |
| Goodness-of-fit on $F^2$                         | 1.040                                                              |
| Final R indexes [ $I \geq 2\sigma(I)$ ]          | $R1 = 0.0318$ , $wR2 = 0.0838$                                     |
| Final R indexes [all data]                       | $R1 = 0.0355$ , $wR2 = 0.0866$                                     |
| Largest diff. peak/hole / $e \text{ \AA}^{-3}$   | 0.10/-0.14                                                         |
| Flack parameter                                  | 0.08(12)                                                           |

## (2) Crystal data and structural refinement for *rac-4d*

Procedure for the recrystallisation of *rac-4d*: To a 10 mL tube containing *rac-4d* (10.0 mg) were added  $\text{CHCl}_3$  (0.5 mL). The mixture was heated until a clear solution was formed, which was kept aside and sealed by a piece of weighing paper with a tiny hole at room temperature to obtain crystals. The crystals were subjected for single crystal XRD to determine structural refinement for *rac-4d*. The data were collected by a Bruker APEX-II CCD diffractometer equipped with a Mo radiation source ( $K\alpha = 0.71073 \text{ \AA}$ ) at 150.0 K. CCDC 2251806 (*rac-4d*) contains the supplementary crystallographic data for this paper. These data can be obtained free of charge via [www.ccdc.cam.ac.uk/data\\_request/cif](http://www.ccdc.cam.ac.uk/data_request/cif).

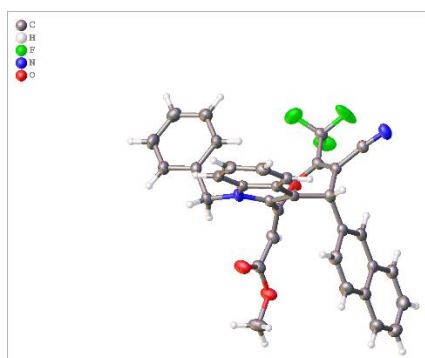

(ellipsoid contour probability 50%)

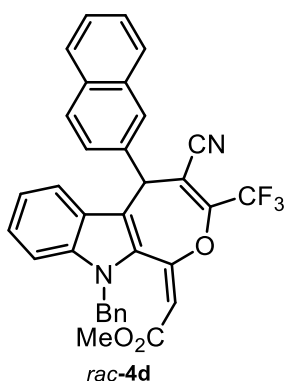

|                     |                                                            |
|---------------------|------------------------------------------------------------|
| Identification code | <i>rac-4d</i>                                              |
| Empirical formula   | $\text{C}_{34}\text{H}_{23}\text{F}_3\text{N}_2\text{O}_3$ |
| Formula weight      | 564.54                                                     |
| Temperature/K       | 150.0                                                      |
| Crystal system      | triclinic                                                  |
| Space group         | P-1                                                        |



|                                             |                                                                  |
|---------------------------------------------|------------------------------------------------------------------|
| a/Å                                         | 10.0380(5)                                                       |
| b/Å                                         | 12.1514(6)                                                       |
| c/Å                                         | 12.3554(7)                                                       |
| $\alpha/^\circ$                             | 77.395(2)                                                        |
| $\beta/^\circ$                              | 67.131(2)                                                        |
| $\gamma/^\circ$                             | 85.909(2)                                                        |
| Volume/Å <sup>3</sup>                       | 1354.98(12)                                                      |
| Z                                           | 2                                                                |
| $\rho_{\text{calc}}/\text{cm}^3$            | 1.384                                                            |
| $\mu/\text{mm}^{-1}$                        | 0.103                                                            |
| F(000)                                      | 584.0                                                            |
| Crystal size/mm <sup>3</sup>                | 0.28 × 0.21 × 0.08                                               |
| Radiation                                   | MoK $\alpha$ ( $\lambda = 0.71073$ )                             |
| 2 $\theta$ range for data collection/       | 4.404 to 54.988                                                  |
| Index ranges                                | -13 ≤ h ≤ 12, -15 ≤ k ≤ 15, -15 ≤ l ≤ 16                         |
| Reflections collected                       | 19422                                                            |
| Independent reflections                     | 6096 [ $R_{\text{int}} = 0.0795$ , $R_{\text{sigma}} = 0.0713$ ] |
| Data/restraints/parameters                  | 6096/0/380                                                       |
| Goodness-of-fit on F <sup>2</sup>           | 1.030                                                            |
| Final R indexes [ $I \geq 2\sigma(I)$ ]     | $R_1 = 0.0525$ , $wR_2 = 0.1142$                                 |
| Final R indexes [all data]                  | $R_1 = 0.0971$ , $wR_2 = 0.1319$                                 |
| Largest diff. peak/hole / e Å <sup>-3</sup> | 0.48/-0.34                                                       |

### (3) Crystal data and structural refinement for **6c**

Procedure for the recrystallisation of **6c**: To a 10 mL tube containing **6c** (20.0 mg) were added CHCl<sub>3</sub> (1.0 mL) and Et<sub>2</sub>O (2.0 mL). The mixture was heated until a clear solution was formed, which was kept aside and sealed by a piece of weighing paper with a tiny hole at room temperature to obtain crystals. The crystals were subjected for single crystal XRD to determine the absolute configuration of enantiopure **6c**. The data were collected by a Bruker APEX-II CCD diffractometer equipped with a Mo radiation source (K $\alpha = 0.71073$  Å) at 273.15 K. CCDC 2251807 (**6c** CHCl<sub>3</sub>) contains the supplementary crystallographic data for this paper. These data can be obtained free of charge via [www.ccdc.cam.ac.uk/data\\_request/cif](http://www.ccdc.cam.ac.uk/data_request/cif).

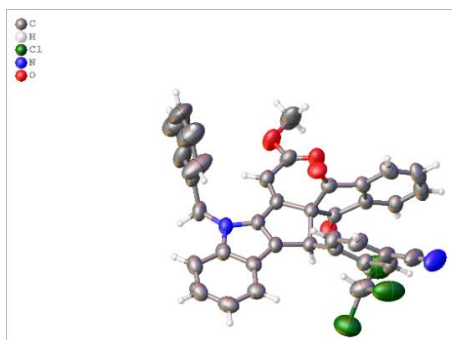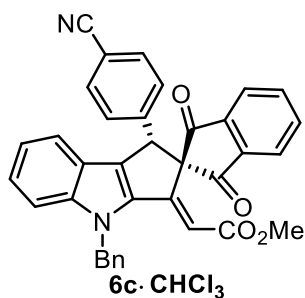

(ellipsoid contour probability 50%)

|                                             |                                                                               |
|---------------------------------------------|-------------------------------------------------------------------------------|
| Identification code                         | <b>6c · CHCl<sub>3</sub></b>                                                  |
| Empirical formula                           | C <sub>37</sub> H <sub>25</sub> Cl <sub>3</sub> N <sub>2</sub> O <sub>4</sub> |
| Formula weight                              | 667.94                                                                        |
| Temperature/K                               | 273.15                                                                        |
| Crystal system                              | monoclinic                                                                    |
| Space group                                 | P2 <sub>1</sub>                                                               |
| a/Å                                         | 13.2537(4)                                                                    |
| b/Å                                         | 8.0062(2)                                                                     |
| c/Å                                         | 15.7406(5)                                                                    |
| α/°                                         | 90                                                                            |
| β/°                                         | 94.6260(10)                                                                   |
| γ/°                                         | 90                                                                            |
| Volume/Å <sup>3</sup>                       | 1664.82(8)                                                                    |
| Z                                           | 2                                                                             |
| ρ <sub>calc</sub> /cm <sup>3</sup>          | 1.332                                                                         |
| μ/mm <sup>-1</sup>                          | 0.318                                                                         |
| F(000)                                      | 688.0                                                                         |
| Crystal size/mm <sup>3</sup>                | 0.43 × 0.15 × 0.13                                                            |
| Radiation                                   | MoKα (λ = 0.71073)                                                            |
| 2θ range for data collection/°              | 4.188 to 55.064                                                               |
| Index ranges                                | -17 ≤ h ≤ 17, -10 ≤ k ≤ 10, -19 ≤ l ≤ 20                                      |
| Reflections collected                       | 35129                                                                         |
| Independent reflections                     | 7649 [R <sub>int</sub> = 0.0619, R <sub>sigma</sub> = 0.0484]                 |
| Data/restraints/parameters                  | 7649/13/398                                                                   |
| Goodness-of-fit on F <sup>2</sup>           | 1.036                                                                         |
| Final R indexes [I >= 2σ (I)]               | R <sub>1</sub> = 0.0667, wR <sub>2</sub> = 0.1763                             |
| Final R indexes [all data]                  | R <sub>1</sub> = 0.1003, wR <sub>2</sub> = 0.2034                             |
| Largest diff. peak/hole / e Å <sup>-3</sup> | 0.40/-0.48                                                                    |
| Flack parameter                             | 0.05(3)                                                                       |

#### (4) Crystal data and structural refinement for **9f**

Procedure for the recrystallisation of **9f**: To a 10 mL tube containing **9f** (10.0 mg) were added  $\text{CHCl}_3$  (1.0 mL) and *n*-hexane (1.0 mL). The mixture was heated until a clear solution was formed, which was kept aside and sealed by a piece of weighing paper with a tiny hole at room temperature to obtain crystals. The crystals were subjected for single crystal XRD to determine the absolute configuration of enantiopure **9f**. The data were collected by a Bruker APEX-II CCD diffractometer equipped with a Mo radiation source ( $K\alpha = 0.71073 \text{ \AA}$ ) at 302.0 K. CCDC 2251808 (**9f**) contains the supplementary crystallographic data for this paper. These data can be obtained free of charge via [www.ccdc.cam.ac.uk/data\\_request/cif](http://www.ccdc.cam.ac.uk/data_request/cif).

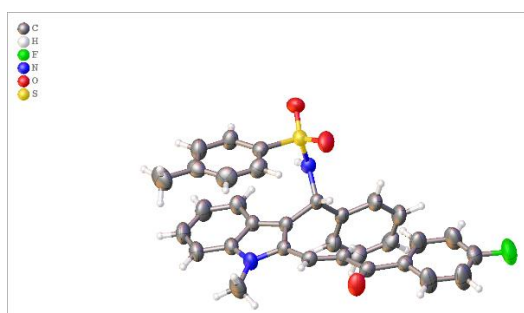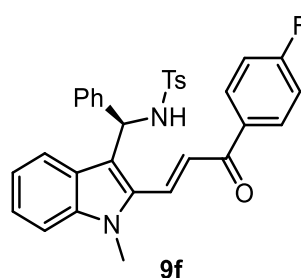

(ellipsoid contour probability 50%)

|                                                |                                                           |
|------------------------------------------------|-----------------------------------------------------------|
| Identification code                            | <b>9f</b>                                                 |
| Empirical formula                              | $\text{C}_{32}\text{H}_{27}\text{FN}_2\text{O}_3\text{S}$ |
| Formula weight                                 | 538.61                                                    |
| Temperature/K                                  | 302.0                                                     |
| Crystal system                                 | triclinic                                                 |
| Space group                                    | P1                                                        |
| $a/\text{\AA}$                                 | 9.2530(5)                                                 |
| $b/\text{\AA}$                                 | 9.3566(5)                                                 |
| $c/\text{\AA}$                                 | 9.9037(6)                                                 |
| $\alpha/^\circ$                                | 106.668(2)                                                |
| $\beta/^\circ$                                 | 101.698(2)                                                |
| $\gamma/^\circ$                                | 117.979(2)                                                |
| Volume/ $\text{\AA}^3$                         | 665.24(7)                                                 |
| Z                                              | 1                                                         |
| $\rho_{\text{calc}}/\text{cm}^3$               | 1.344                                                     |
| $\mu/\text{mm}^{-1}$                           | 0.166                                                     |
| F(000)                                         | 282.0                                                     |
| Crystal size/ $\text{mm}^3$                    | $0.41 \times 0.25 \times 0.17$                            |
| Radiation                                      | MoK $\alpha$ ( $\lambda = 0.71073$ )                      |
| 2 $\theta$ range for data collection/ $^\circ$ | 4.682 to 55.258                                           |

|                                             |                                                               |
|---------------------------------------------|---------------------------------------------------------------|
| Index ranges                                | -12 ≤ h ≤ 12, -12 ≤ k ≤ 12, -12 ≤ l ≤ 12                      |
| Reflections collected                       | 19634                                                         |
| Independent reflections                     | 6078 [R <sub>int</sub> = 0.0484, R <sub>sigma</sub> = 0.0451] |
| Data/restraints/parameters                  | 6078/4/358                                                    |
| Goodness-of-fit on F <sup>2</sup>           | 1.038                                                         |
| Final R indexes [I ≥ 2σ (I)]                | R <sub>1</sub> = 0.0386, wR <sub>2</sub> = 0.0881             |
| Final R indexes [all data]                  | R <sub>1</sub> = 0.0504, wR <sub>2</sub> = 0.0941             |
| Largest diff. peak/hole / e Å <sup>-3</sup> | 0.15/-0.19                                                    |
| Flack parameter                             | 0.01(3)                                                       |

### (5) Crystal data and structural refinement for **11g**

Procedure for the recrystallisation of **11g**: To a 10 mL tube containing **11g** (15.0 mg) were added CHCl<sub>3</sub> (1.0 mL) and *n*-hexane (1.0 mL). The mixture was heated until a clear solution was formed, which was kept aside and sealed by a piece of weighing paper with a tiny hole at room temperature to obtain crystals. The crystals were subjected for single crystal XRD to determine the absolute configuration of enantiopure **11g**. The data were collected by a Bruker APEX-II CCD diffractometer equipped with a Mo radiation source (Kα = 0.71073 Å) at 184.0 K. CCDC 2251809 (**11g**) contains the supplementary crystallographic data for this paper. These data can be obtained free of charge via [www.ccdc.cam.ac.uk/data\\_request/cif](http://www.ccdc.cam.ac.uk/data_request/cif).

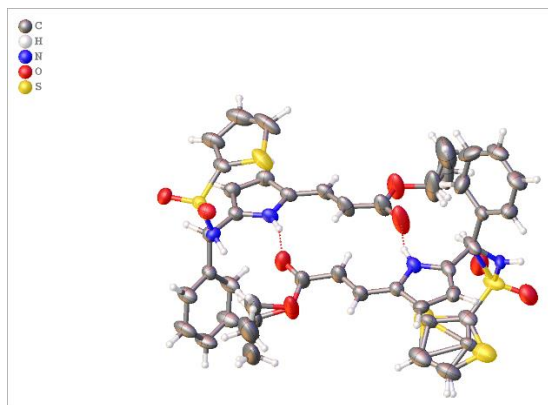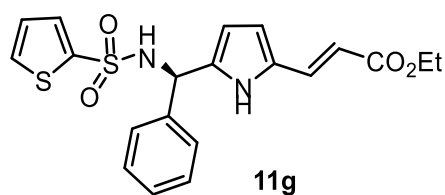

(ellipsoid contour probability 50%)

|                     |                                                                              |
|---------------------|------------------------------------------------------------------------------|
| Identification code | <b>11g</b>                                                                   |
| Empirical formula   | C <sub>20</sub> H <sub>20</sub> N <sub>2</sub> O <sub>4</sub> S <sub>2</sub> |
| Formula weight      | 461.08                                                                       |
| Temperature/K       | 184.0                                                                        |
| Crystal system      | monoclinic                                                                   |
| Space group         | P2 <sub>1</sub>                                                              |
| a/Å                 | 10.1003(4)                                                                   |
| b/Å                 | 15.1715(5)                                                                   |
| c/Å                 | 13.9176(5)                                                                   |

|                                               |                                                               |
|-----------------------------------------------|---------------------------------------------------------------|
| $\alpha/^\circ$                               | 90                                                            |
| $\beta/^\circ$                                | 101.792(2)                                                    |
| $\gamma/^\circ$                               | 90                                                            |
| Volume/ $\text{\AA}^3$                        | 2087.68(13)                                                   |
| Z                                             | 2                                                             |
| $\rho_{\text{calc}}/\text{cm}^3$              | 1.322                                                         |
| $\mu/\text{mm}^{-1}$                          | 0.283                                                         |
| F(000)                                        | 868.0                                                         |
| Crystal size/ $\text{mm}^3$                   | $0.38 \times 0.24 \times 0.11$                                |
| Radiation                                     | MoK $\alpha$ ( $\lambda = 0.71073$ )                          |
| $2\Theta$ range for data collection/ $^\circ$ | 4.018 to 55.086                                               |
| Index ranges                                  | $-13 \leq h \leq 13, -19 \leq k \leq 19, -18 \leq l \leq 18$  |
| Reflections collected                         | 37794                                                         |
| Independent reflections                       | 9567 [ $R_{\text{int}} = 0.0821, R_{\text{sigma}} = 0.0654$ ] |
| Data/restraints/parameters                    | 9567/38/562                                                   |
| Goodness-of-fit on $F^2$                      | 1.030                                                         |
| Final R indexes [ $I \geq 2\sigma(I)$ ]       | $R_1 = 0.0537, wR_2 = 0.1156$                                 |
| Final R indexes [all data]                    | $R_1 = 0.0789, wR_2 = 0.1273$                                 |
| Largest diff. peak/hole / $e \text{\AA}^{-3}$ | 0.53/-0.53                                                    |
| Flack parameter                               | -0.01(4)                                                      |

## (6) Crystal data and structural refinement for **21**

Procedure for the recrystallisation of **21**: To a 10 mL tube containing **21** (20.0 mg) were added EtOAc (1.0 mL) and *n*-hexane (1.0 mL). The mixture was heated until a clear solution was formed, which was kept aside and sealed by a piece of weighing paper with a tiny hole at room temperature to obtain crystals. The crystals were subjected for single crystal XRD to determine the absolute configuration of enantiopure **21**. The data were collected by a Bruker APEX-II CCD diffractometer equipped with a Mo radiation source ( $K\alpha = 0.71073 \text{ \AA}$ ) at 302.0 K. CCDC 2251810 (**21**) contains the supplementary crystallographic data for this paper. These data can be obtained free of charge via [www.ccdc.cam.ac.uk/data\\_request/cif](http://www.ccdc.cam.ac.uk/data_request/cif).

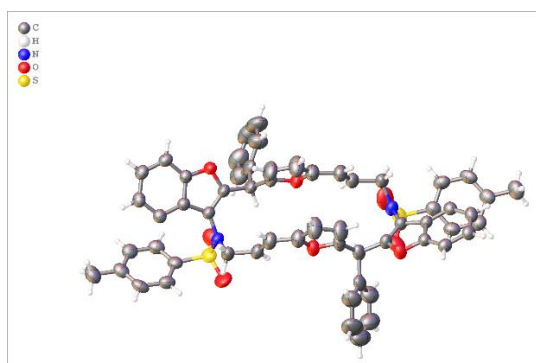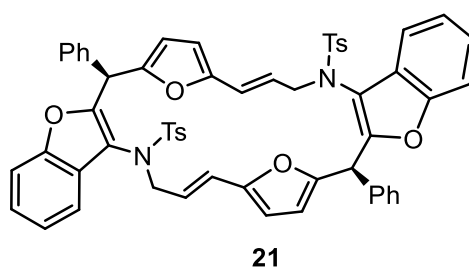

(ellipsoid contour probability 50%)

|                                                |                                                                  |
|------------------------------------------------|------------------------------------------------------------------|
| Identification code                            | <b>21</b>                                                        |
| Empirical formula                              | $C_{58}H_{44}N_2O_8S_2$                                          |
| Formula weight                                 | 961.07                                                           |
| Temperature/K                                  | 302.0                                                            |
| Crystal system                                 | monoclinic                                                       |
| Space group                                    | C2                                                               |
| a/Å                                            | 32.1431(8)                                                       |
| b/Å                                            | 7.1890(2)                                                        |
| c/Å                                            | 11.8007(3)                                                       |
| $\alpha/^\circ$                                | 90                                                               |
| $\beta/^\circ$                                 | 98.963(2)                                                        |
| $\gamma/^\circ$                                | 90                                                               |
| Volume/Å <sup>3</sup>                          | 2693.57(12)                                                      |
| Z                                              | 2                                                                |
| $\rho_{\text{calc}}/\text{cm}^3$               | 1.185                                                            |
| $\mu/\text{mm}^{-1}$                           | 0.153                                                            |
| F(000)                                         | 1004.0                                                           |
| Crystal size/mm <sup>3</sup>                   | 0.2 × 0.2 × 0.1                                                  |
| Radiation                                      | MoK $\alpha$ ( $\lambda = 0.71073$ )                             |
| 2 $\Theta$ range for data collection/ $^\circ$ | 5.81 to 49.998                                                   |
| Index ranges                                   | -38 ≤ h ≤ 38, -8 ≤ k ≤ 8, -14 ≤ l ≤ 14                           |
| Reflections collected                          | 22880                                                            |
| Independent reflections                        | 4626 [ $R_{\text{int}} = 0.0453$ , $R_{\text{sigma}} = 0.0315$ ] |
| Data/restraints/parameters                     | 4626/1/317                                                       |
| Goodness-of-fit on F <sup>2</sup>              | 1.066                                                            |
| Final R indexes [ $I \geq 2\sigma(I)$ ]        | $R_1 = 0.0425$ , $wR_2 = 0.1046$                                 |
| Final R indexes [all data]                     | $R_1 = 0.0554$ , $wR_2 = 0.1151$                                 |
| Largest diff. peak/hole / e Å <sup>-3</sup>    | 0.29/-0.17                                                       |
| Flack parameter                                | 0.07(3)                                                          |

## 17. Mechanism studies

### (1) Control experiment

To get more insight into the mechanism, some control experiments were carried out. Substrate **1a''** without an electron-withdrawing group showed high reactivity, and it could undergo Friedel–Crafts reaction with **2a** in the absence of Pd catalyst. In contrast, **1a** was inert without catalysts, while the reaction proceeded smoothly under the catalysis of  $\text{Pd}(\text{PPh}_3)_4$ , indicating that there is no background reaction. No reaction occurred with  $\text{Pd}(\text{OAc})_2$ , demonstrating the importance of  $\text{Pd}^0$ . Besides, indole derivative **1a'** was applied to the reaction with **2a** under the catalysis of  $\text{Pd}(\text{PPh}_3)_4$ , but no Friedel–Crafts product was observed, demonstrating the importance of the conjugated alkyne group. Similar phenomenon was observed for the reaction of 2-alkenyl indole **7a** with imine **2a**, implying the importance of  $\text{Pd}^0$  and the conjugated alkene group.

#### 1) Control experiment of indole derivatives and enone **2a**.

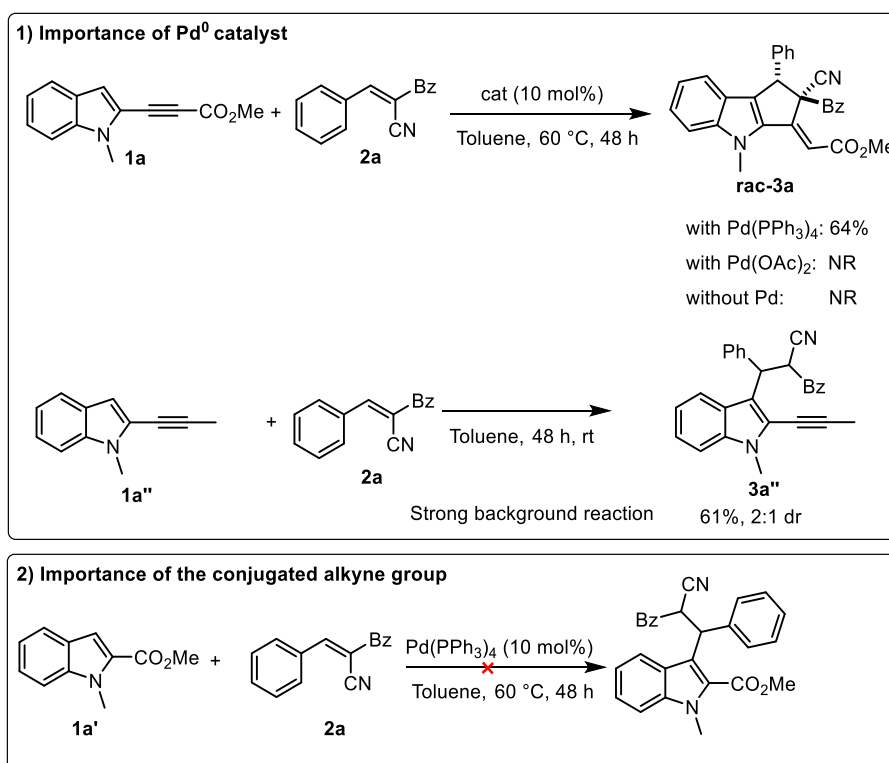

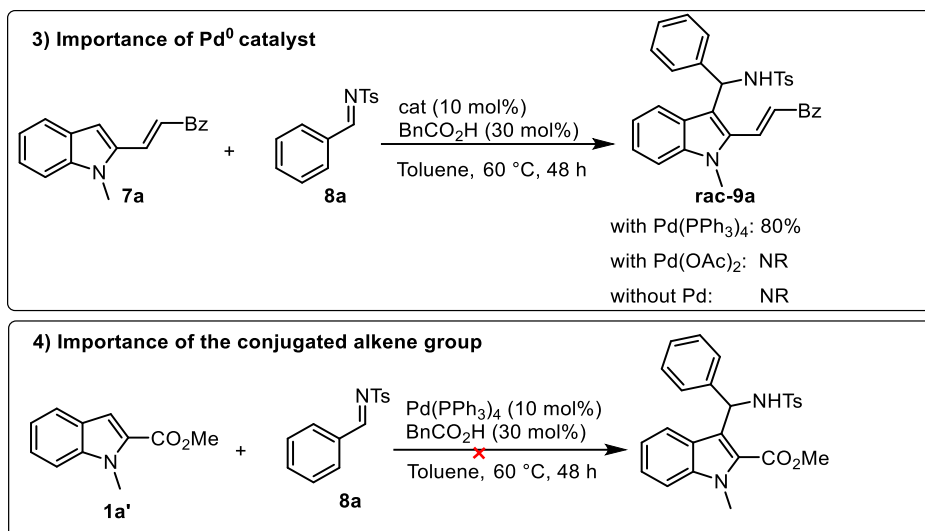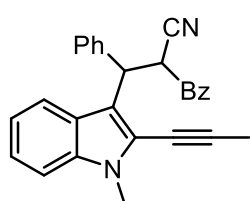

**1a''** (8.5 mg, 0.050 mmol) and **2a** (11.6 mg, 0.0500 mmol) were dissolved in toluene (0.5 mL), and the mixture was stirred at rt for 48 h. After completion, it was purified by flash chromatography on silica gel (EtOAc/petroleum ether = 1/10) to give product **3a''**: 15.4 mg, 61% yield, colorless oil; 2:1 dr; **<sup>1</sup>H NMR**

(400 MHz, CDCl<sub>3</sub>): δ (ppm) 7.89–7.84 (m, 2H), 7.61–7.51 (m, 5H), 7.36–7.30 (m, 3H), 7.23–7.21 (m, 1H), 7.10–7.01 (m, 3H), 5.89 (d, *J* = 10.9 Hz, 1H), 5.28 (d, *J* = 10.9 Hz, 1H), 3.57 (s, 3H), 2.09 (s, 3H); **<sup>13</sup>C NMR** (100 MHz, CDCl<sub>3</sub>): δ (ppm) 189.6, 140.0, 136.6, 134.8, 133.9, 128.71, 128.66, 128.6, 128.3, 127.5, 125.8, 123.2, 120.1, 119.7, 119.1, 117.3, 117.0, 109.3, 96.5, 71.6, 43.1, 43.0, 30.4, 4.9; **HRMS** (ESI-TOF) *m/z*: [M + Na]<sup>+</sup> Calcd for C<sub>28</sub>H<sub>22</sub>N<sub>2</sub>ONa<sup>+</sup> 425.1625, found 425.1632.



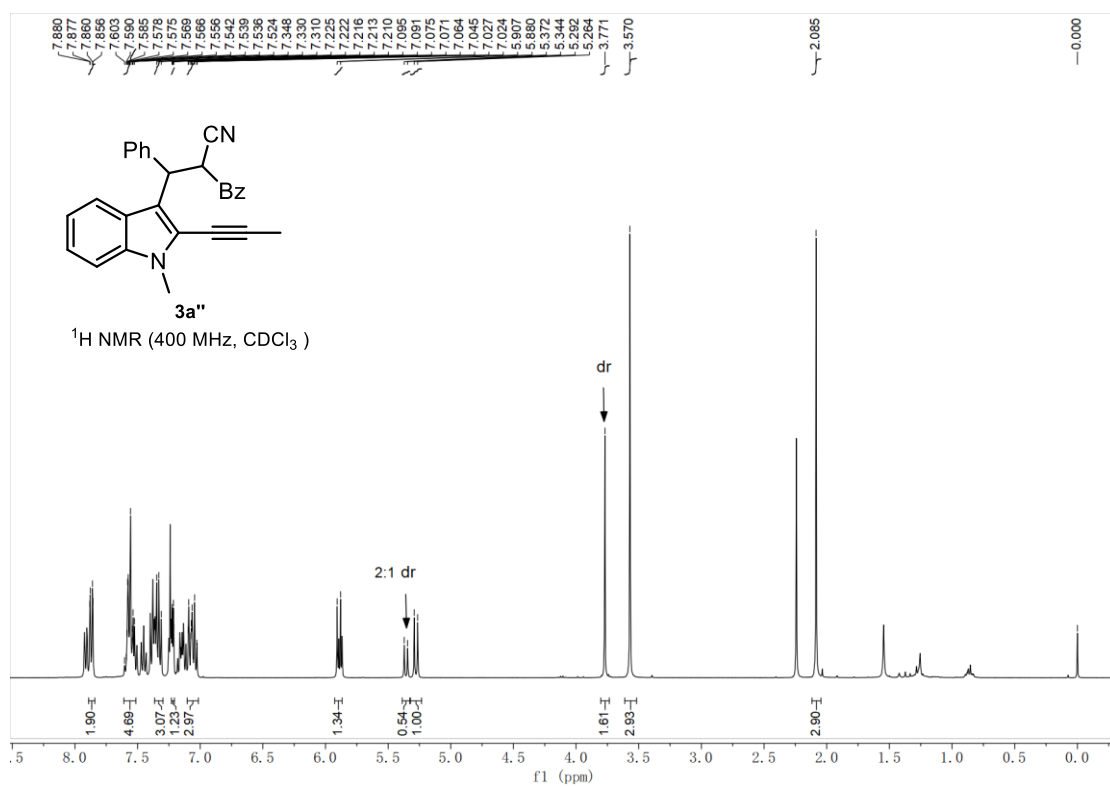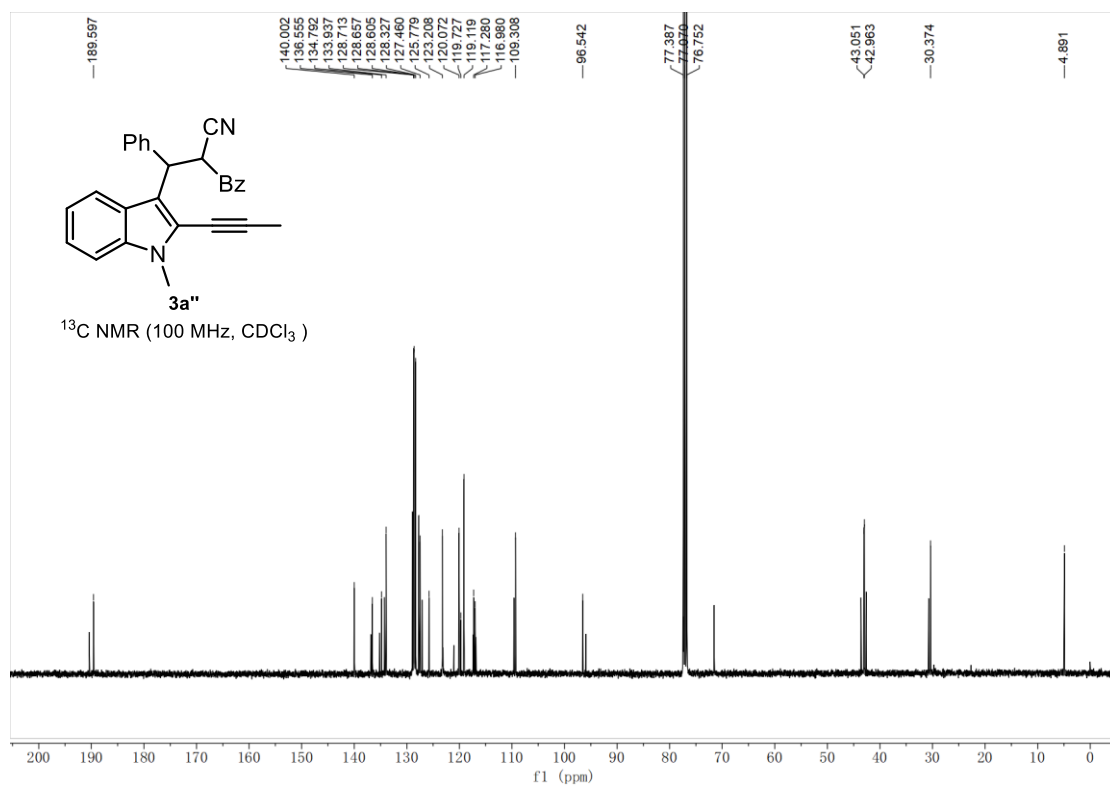

## Spectrum Plot Report

Agilent | Trusted Answers

|                |                 |              |              |                  |                                 |
|----------------|-----------------|--------------|--------------|------------------|---------------------------------|
| Name           | CYC-230705-13   | Rack Pos.    | Instrument   | Instrument 1     | Operator                        |
| Inj. Vol. (ul) | 8               | Plate Pos.   | IRM Status   | Some ions missed |                                 |
| Data File      | CYC-230705-13.d | Method (Acq) | Comment      |                  | Acq. Time (Local)               |
|                |                 |              | CJH_230210.m |                  | 7/7/2023 5:47:33 PM (UTC+08:00) |

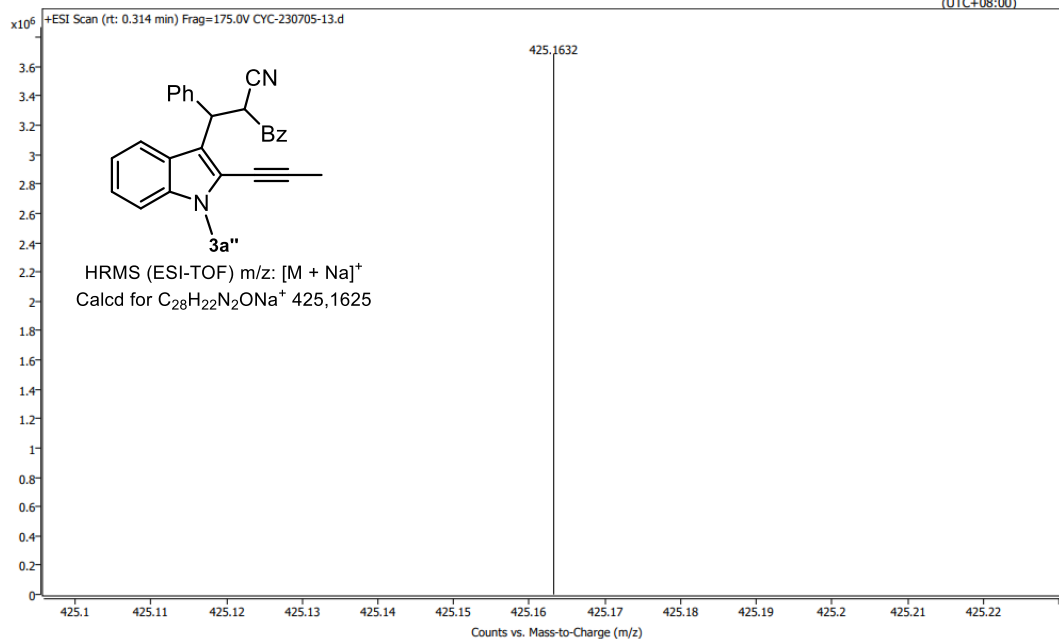

Page 1 of 1

Generated at 3:02 PM on 7/11/2023

## (2) HRMS study

Spectrum from 20230719.wiff2 (sample 9) - 7, +TOF MS (700 - 1000) from 0.044 to 0.101 min, noise filtered ...7 min, noise filtered (noise multiplier = 1.5), Gaussian smoothed (0.5 points), centroided, Recalibrated

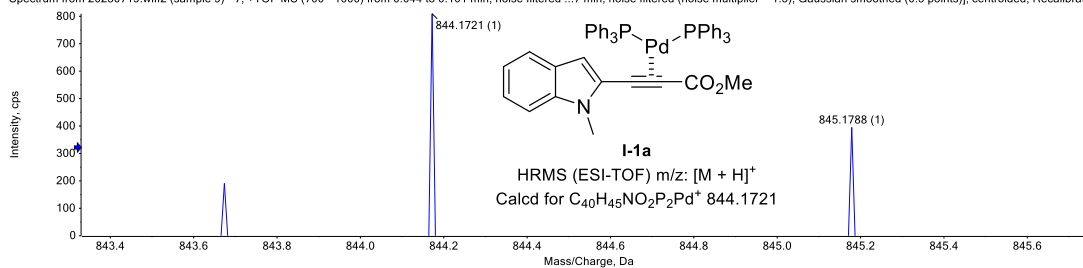

Spectrum from 20230715.wiff2 (sample 14) - 16, +TOF MS (100 - 1200) from 0.057 to 0.121 min, noise filtered (noise multiplier = 1.5), Gaussian smoothed (0.5 points), Recalibrated, centroided

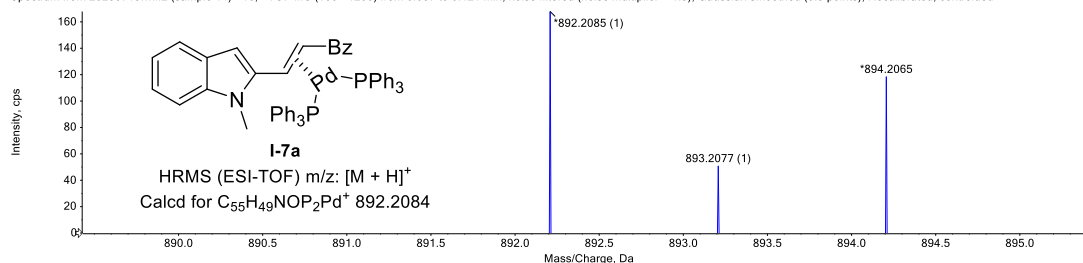

## (3) NMR experiments

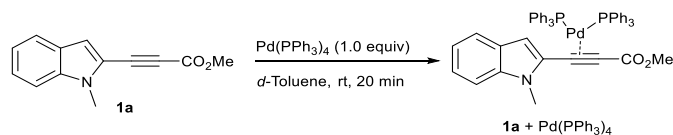

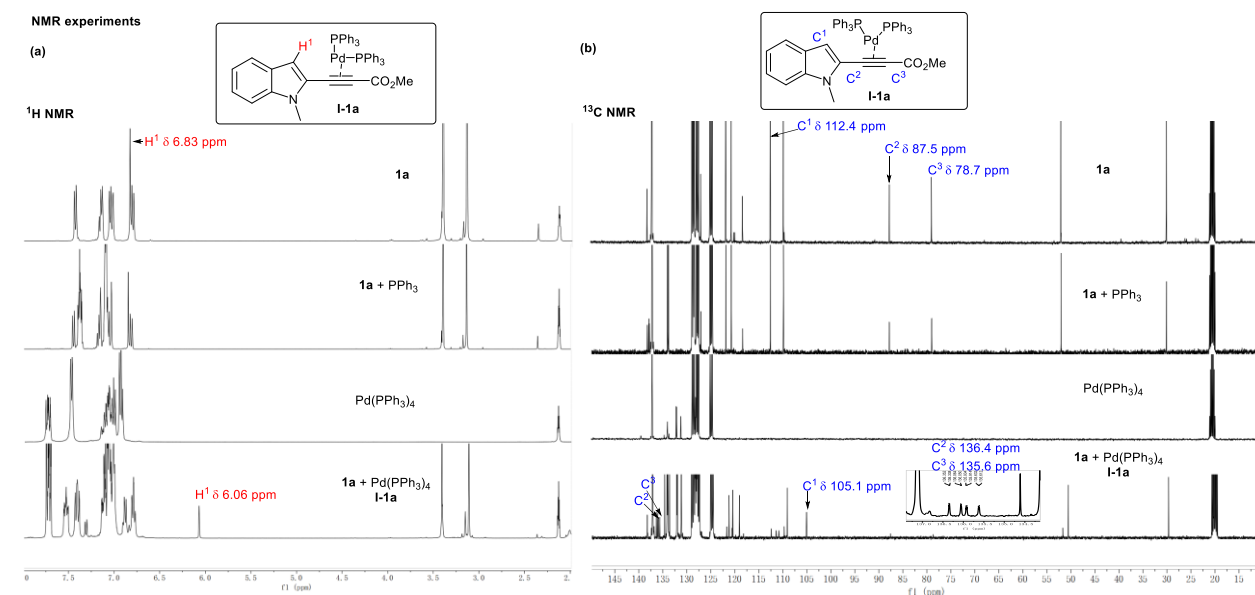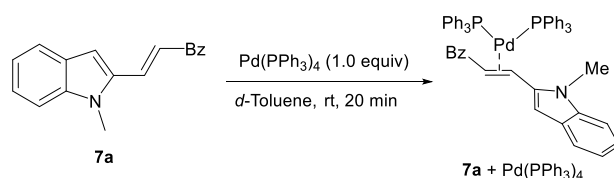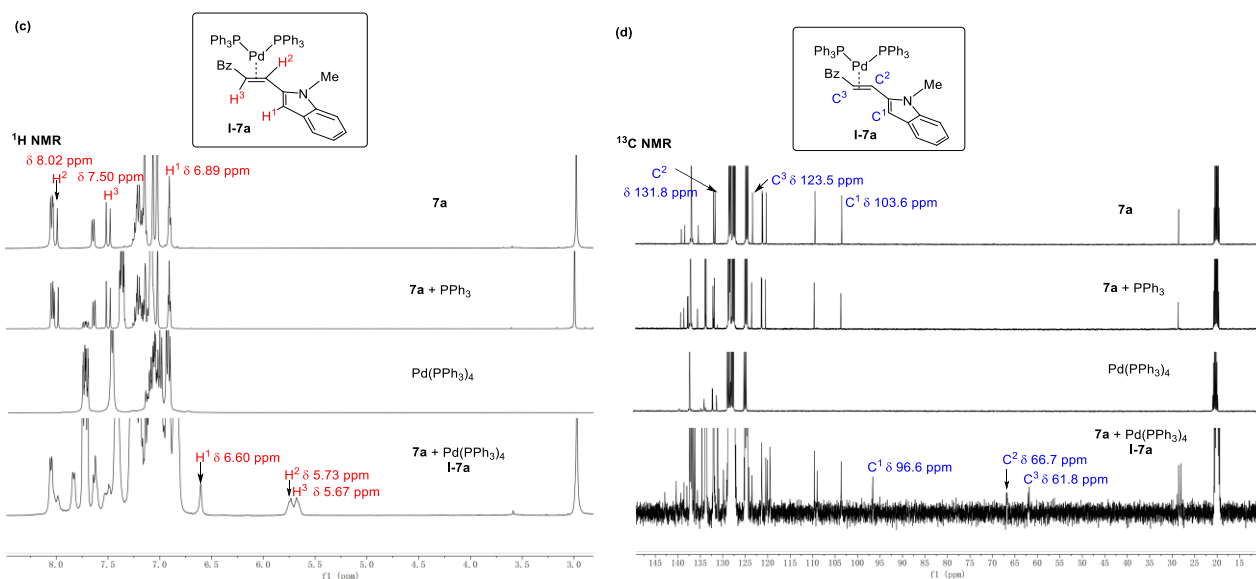

The <sup>1</sup>H NMR analysis showed that 3-H (H<sup>1</sup>) of **1a** experienced apparent high-field shifts when Pd(PPh<sub>3</sub>)<sub>4</sub> was added (6.06 vs 6.83 ppm). The possible nucleophilic attack of PPh<sub>3</sub> to electron-deficient **1a** was not observed by mixing **1a** and PPh<sub>3</sub> (a). The <sup>13</sup>C NMR experiments showed that the signals of the triple bond of **1a** disappeared (around 70–80 ppm) after adding Pd(PPh<sub>3</sub>)<sub>4</sub>, while new peaks were observed at the sp<sup>2</sup>-carbon region (C<sup>2</sup> and C<sup>3</sup>, around 136 ppm); in contrast, C<sup>1</sup> of **1a** experienced significant high-field shifts (105.1 vs 112.4 ppm) (b). Similarly, the signals of H<sup>1</sup>, H<sup>2</sup>, H<sup>3</sup>, C<sup>1</sup>, C<sup>2</sup> and C<sup>3</sup> of **7a** were all high-field shifted in the presence of Pd(PPh<sub>3</sub>)<sub>4</sub>, according to the NMR

experiments. These results well supported that the proposed complexes **I-1a** and **I-7a** would be formed, and verified the  $\pi$ -Lewis base activation of Pd<sup>0</sup> through the coordination to the unsaturated group (**c** and **d**).

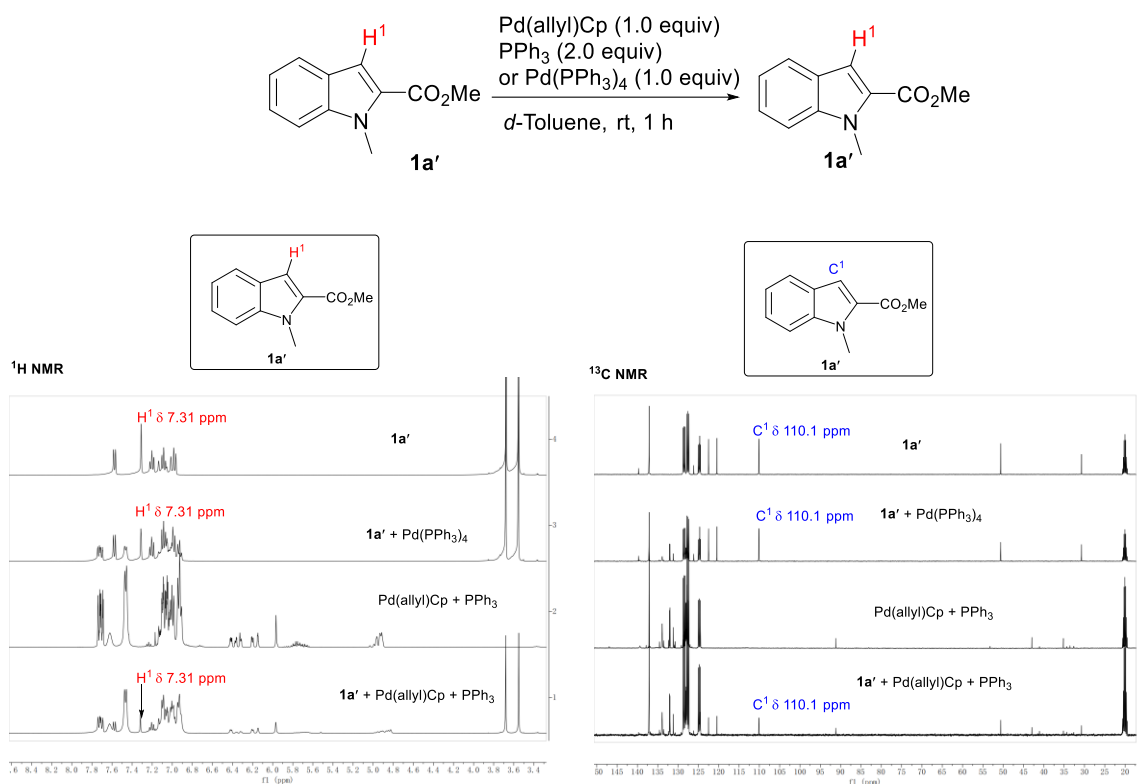

In contrast, no chemical shifts were observed for substrate **1a'** when mixed with Pd(PPh<sub>3</sub>)<sub>4</sub> or Pd(allyl)Cp, demonstrating the importance of the conjugated triple or double bond.

### Procedure of NMR experiments

An oven-dried 5 mL test-tube equipped with a septum and a magnetic stir bar was charged with **1b** (2.9 mg, 0.010 mmol) or **7a** (2.6 mg, 0.010 mmol) and Pd(PPh<sub>3</sub>)<sub>4</sub> (11.5 mg, 0.0100 mmol). The tube was then evacuated and filled with argon. This cycle was repeated five times, and deuterated toluene (0.5 mL) was added via syringe. The resulting solution was stirred at rt for 20 min. The mixture was analyzed by NMR.

An oven-dried 5 mL test-tube equipped with a septum and a magnetic stir bar was charged with **1a'** (3.8 mg, 0.020 mmol), PPh<sub>3</sub> (10.5 mg, 0.0400 mmol) and Pd(allyl)Cp (4.3 mg, 0.020 mmol). The tube was then evacuated and filled with argon. This cycle was repeated five times, and deuterated toluene (0.5 mL) was added via syringe. The resulting solution was stirred at rt for 1 h. The mixture was analyzed by NMR.

#### (4) Transformation of $\eta^2$ -Pd<sup>0</sup>-unsaturated indole complexes with electrophiles

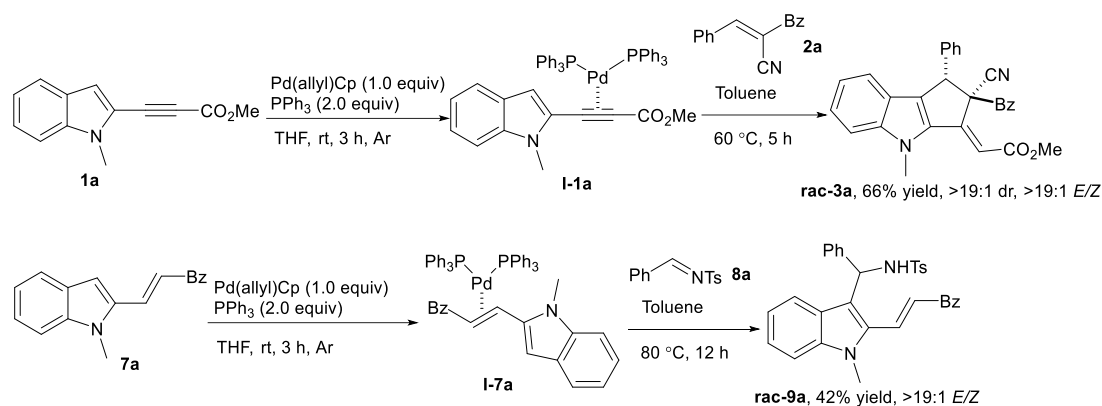

An oven-dried 10 mL Schlenk tube equipped with a magnetic stir bar was charged with unsaturated indoles **1a** (21.3 mg, 0.100 mmol, 1.0 equiv) or **7a** (26.1 mg, 0.100 mmol, 1.0 equiv), PPh<sub>3</sub> (52.4 mg, 0.200 mmol, 2.0 equiv), Pd(allyl)Cp (21.2 mg, 0.100 mmol, 1.0 equiv). The tube was then evacuated and back-filled three times with argon, and degassed THF (0.5 mL) was added via syringe. The resulting solution was stirred at room temperature for 3 h. After completion, the mixture was concentrated and dried in vacuum to give crude product **I-1a** or **I-7a**. Then **I-1a** and **2a** were added to an oven-dried 10 mL Schlenk tube. After the tube was evacuated and back-filled three times with argon, degassed toluene (0.5 mL) was added via syringe. The resulting solution was stirred at 60 °C for 5 h. After completion, the crude product was directly purified by flash chromatography on silica gel (EtOAc/petroleum ether = 1/10) to give **rac-3a** (29.4 mg, 66% yield, >19:1 dr, >19:1 E/Z). Similarly, **I-7a** and **8a** were added to an oven-dried 10 mL Schlenk tube. After the tube was evacuated and back-filled three times with argon, degassed toluene (0.5 mL) was added via syringe. The resulting solution was stirred at 80 °C for 12 h. After completion, Et<sub>2</sub>O (3 mL) was added and the mixture was stirred 30 min at 0 °C. The precipitates were filtered, and washed with cold Et<sub>2</sub>O (3 × 3 mL). The cake was collected and dissolved in DCM. The mixture was filtered again, and washed with DCM (5 × 5 mL). The filtrate was concentrated to give **rac-9a** (21.8 mg, 42% yield, >19:1 E/Z).

#### (5) DFT calculations

##### 1) Computational details

In this work, all geometry optimizations and single-point energy calculations were carried out using Gaussian 09.<sup>11</sup> Geometries of minima and transition states were optimized using the B3LYP functional<sup>12</sup> with basis set 6-31G(d) (SDD for Pd atom) in gas phase. Vibrational frequency calculations were performed for all the stationary points to confirm if each optimized structure is a

local minimum or a transition state structure, as well as deriving the thermochemical corrections for the enthalpies and free energies. Solvation energy corrections were calculated in 1,4-Dioxane with the continuum solvation model (SMD)<sup>13</sup> based on the gas-phase optimized geometries. To gain more accurate results, the M06 functional<sup>14</sup> with basis set 6-311++G(d,p) (SDD for Pd atom) was used for solvation single-point energy calculations. The integration grids defined by the ‘Int=Ultrafine’ keyword were used for all calculations.

**2) DFT calculations on the unsaturated indoles and related  $\eta^2$ -Pd<sup>0</sup>-complexes** (The calculations were performed at the B3LYP/6-31G(d)(SDD for Pd) (298.15K) level of theory)

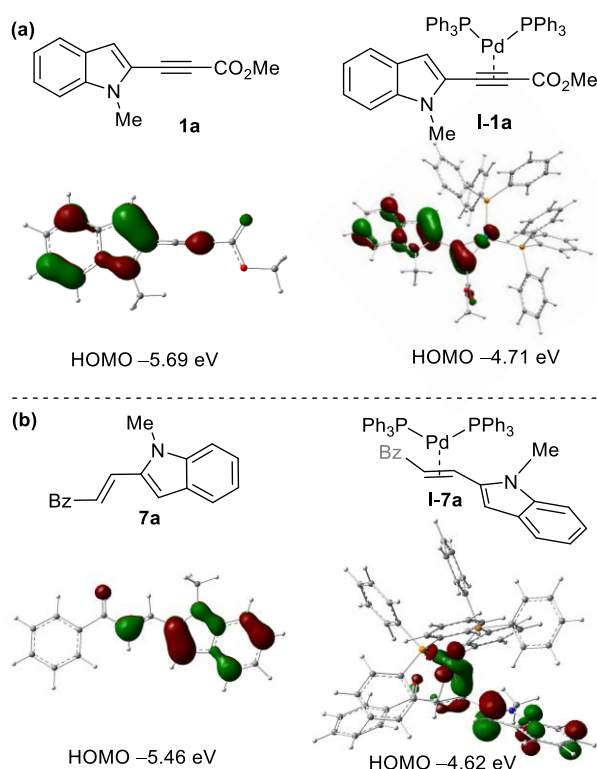

To get more insight into the catalytic mechanism, we conducted frontier molecular orbital (FMO) analysis on the Pd<sup>0</sup> complexes of unsaturated indoles. In comparison with the parent substrate alkyne **1a** (-5.69 eV) or alkene **7a** (-5.46 eV), the HOMO energy of corresponding  $\eta^2$ -Pd<sup>0</sup>-complex **I-1a** (-4.71 eV) or **I-7a** (-4.62 eV) is apparently raised, respectively, supporting the  $\pi$ -Lewis back donation of Pd<sup>0</sup> as a Lewis base.

**3) Computed energy profiles for the FC step and deprotonation step** (The calculations were performed at the M06/6-311++G(d,p)(SDD for Pd)/SMD//B3LYP/6-31G(d)(SDD for Pd) (298.15K) level of theory)

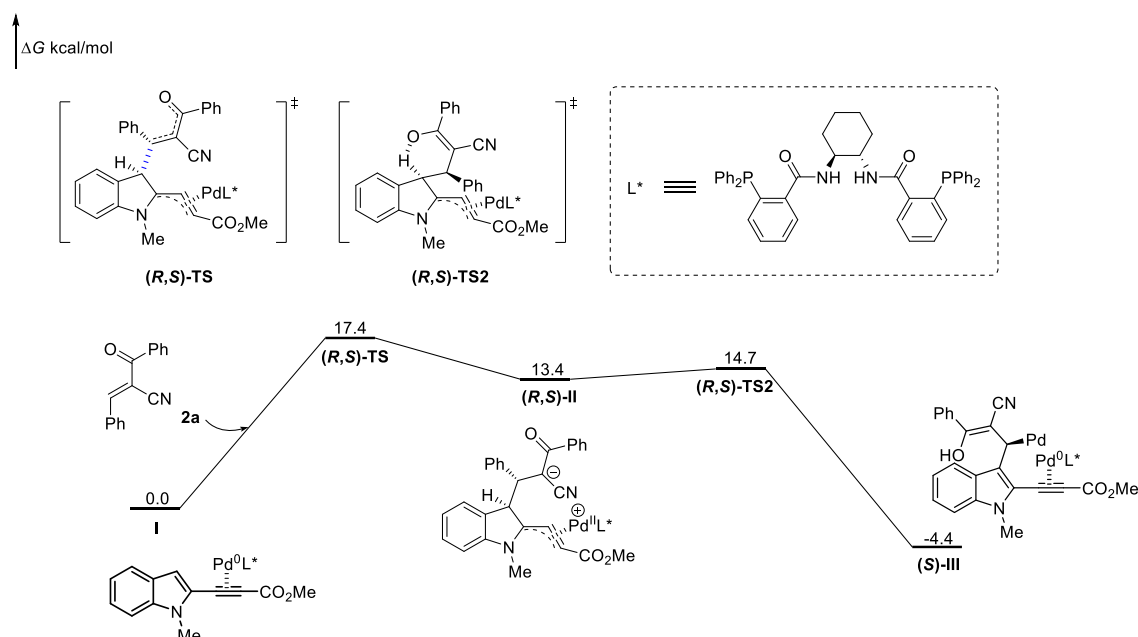

The electrophilic aromatic substitution contains two steps: 1) FC addition step, and 2) deprotonation/aromatisation. Upon the Pd<sup>0</sup>- $\pi$ -Lewis base activation, the FC addition step proceeds via (R,S)-**TS** to generate intermediate (R,S)-**II**. The energy barrier for (R,S)-**TS** is 17.4 kcal/mol, which is the highest in the whole process. Thus this is the rate-determining step. The subsequent deprotonation/aromatisation proceeds via an intramolecular 1,5-proton transfer [via (R,S)-**TS2**] to give aromatic substituted intermediate (S)-**III**. The relative free energy of (R,S)-**TS2** is 2.7 kcal/mol lower than that of (R,S)-**TS**, indicating that the FC addition step is irreversible. The subsequent Michael addition is not catalysed by Pd. Therefore, the FC addition step is the stereochemistry-determining step for this electrophilic aromatic substitution.

**4) Enantioselectivity of the formation of chiral 3a** (The calculations were performed at the M06/6-311++G(d,p)(SDD for Pd)/SMD//B3LYP/6-31G(d)(SDD for Pd) (298.15K) level of theory)

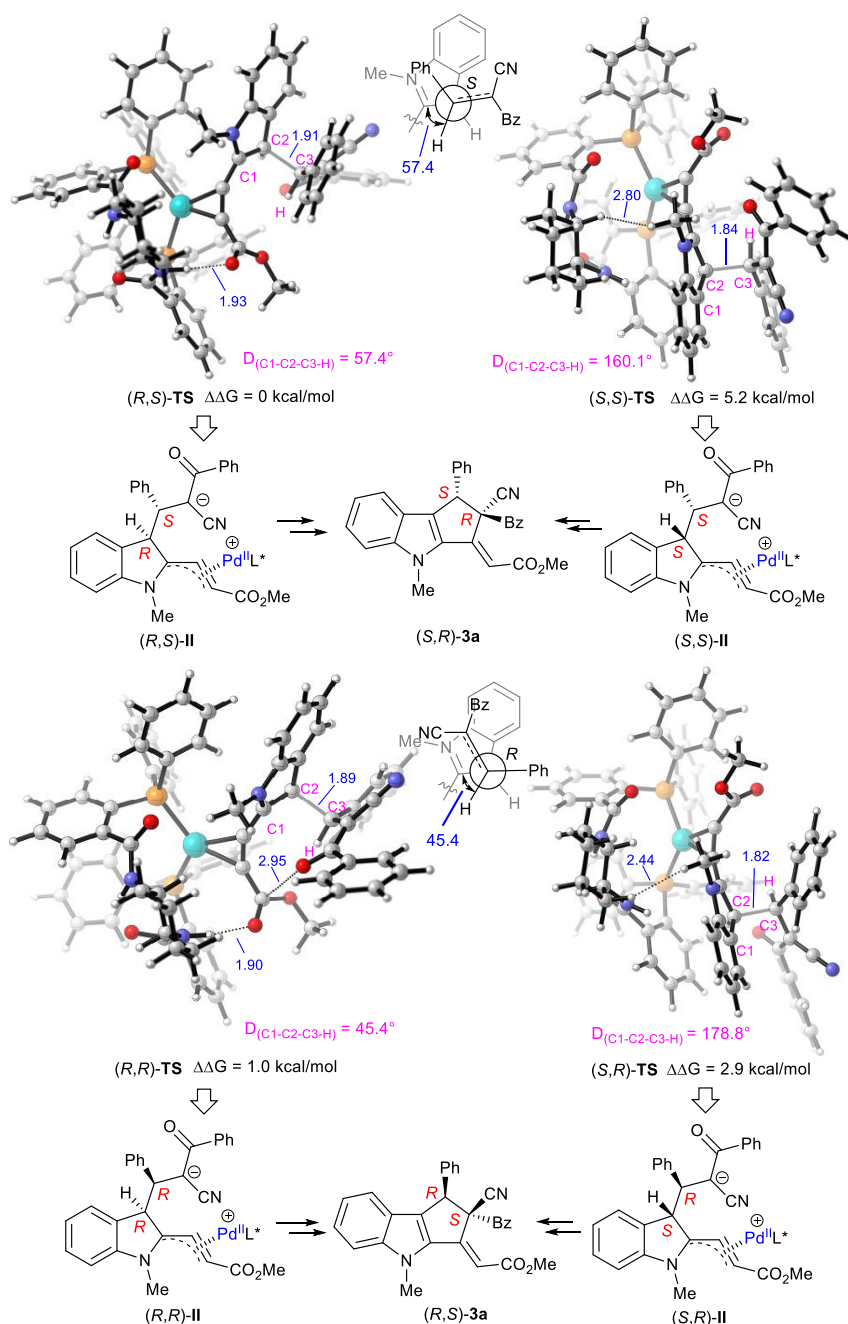

We also investigated the origins of enantioselectivity in the reaction of alkyne **1a** and enone **2a**. The enantiocontrol of this transformation was determined in the FC addition step, in which the first C–C bond was constructed, four transition states were considered. Transition states  $(R,S)\text{-TS}$  and  $(S,S)\text{-TS}$  would lead to product  $(S,R)\text{-3a}$  via  $(R,S)\text{-II}$  and  $(S,S)\text{-II}$ , respectively, and the stereogenic centre at 3-C of indole would disappear through deprotonation/aromatisation. On the other hand,  $(R,R)\text{-TS}$  and  $(S,R)\text{-TS}$  would lead to enantiomer  $(R,S)\text{-3a}$  via similar transformations. Notably, H-bonding interaction between the NH group of **L1** and the carbonyl group of **1a** is observed in  $(R,S)\text{-TS}$  and  $(R,R)\text{-TS}$ , while the other two transition states without H-bonding interaction exhibit higher energies [5.2 kcal/mol for  $(S,S)\text{-TS}$ ; 2.9 kcal/mol for  $(S,R)\text{-TS}$ ]. The results indicate that the H-



bonding is beneficial for the reaction, which is consistent with the experimental results (Table 1, entry 5 vs entry 8). Geometric structure analyses show that the forming C–C bond in (*R,R*)-**TS** presents a pseudogauche conformation to avoid the steric repulsion between the ester group of **1a** and the carbonyl of **2a**. As a result, the dihedral angle  $D_{C1-C2-C3-H}$  is  $45.4^\circ$  with apparent torsional strain. In contrast, (*R,S*)-**TS** possesses smaller torsional strain (referring to the corresponding  $D_{C1-C2-C3-H} = 57.4^\circ$ ), thus leading to lower energy [0 kcal/mol for (*R,S*)-**TS** vs 1.0 kcal/mol for (*R,R*)-**TS**]. Therefore, the most favourable transition state (*R,S*)-**TS** would afford (*S,R*)-**3a** as the major product after annulation, which is consistent with the experimental observation.

**5) Hydrogen bonding mode** (The calculations were performed at the M06/6-311++G(d,p)(SDD for Pd)/SMD//B3LYP/6-31G(d)(SDD for Pd) (298.15K) level of theory)

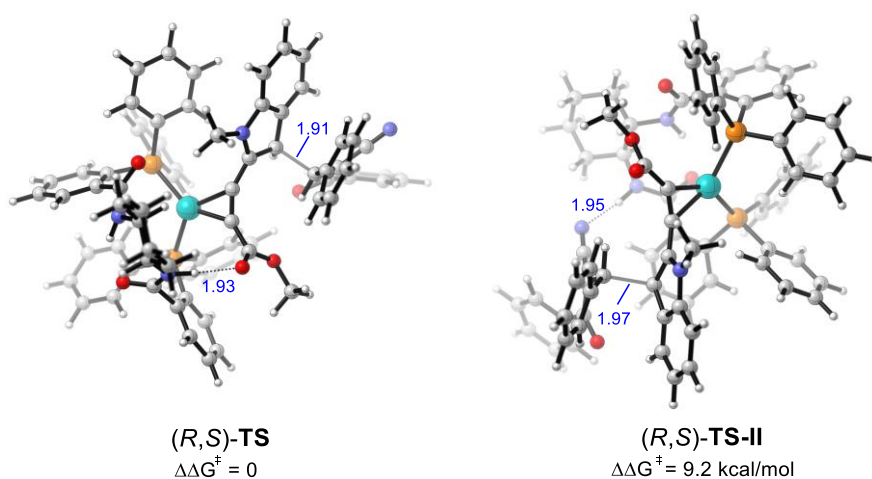

Since the NH group of **L1** plays an important role for the enantioselectivity, two H-bonding interaction modes were considered. In the first mode, the NH group in **L1** interacts with the ester group of **1a**, forming a chiral binding pocket to achieve stereocontrol [(*R,S*)-**TS**]. In the second mode, the NH group in **L1** interacts with the carbonyl of **2a** [(*R,S*)-**TS-II**]. According to computational results, the energy of (*R,S*)-**TS-II** is 9.2 kcal/mol higher than that of (*R,S*)-**TS**, indicating that the first mode is favoured.

**6) Thermodynamic stability of several possible stereoselective products** (The calculations were performed at the M06/6-311++G(d,p)(SDD for Pd)/SMD//B3LYP/6-31G(d)(SDD for Pd) (298.15K) level of theory)

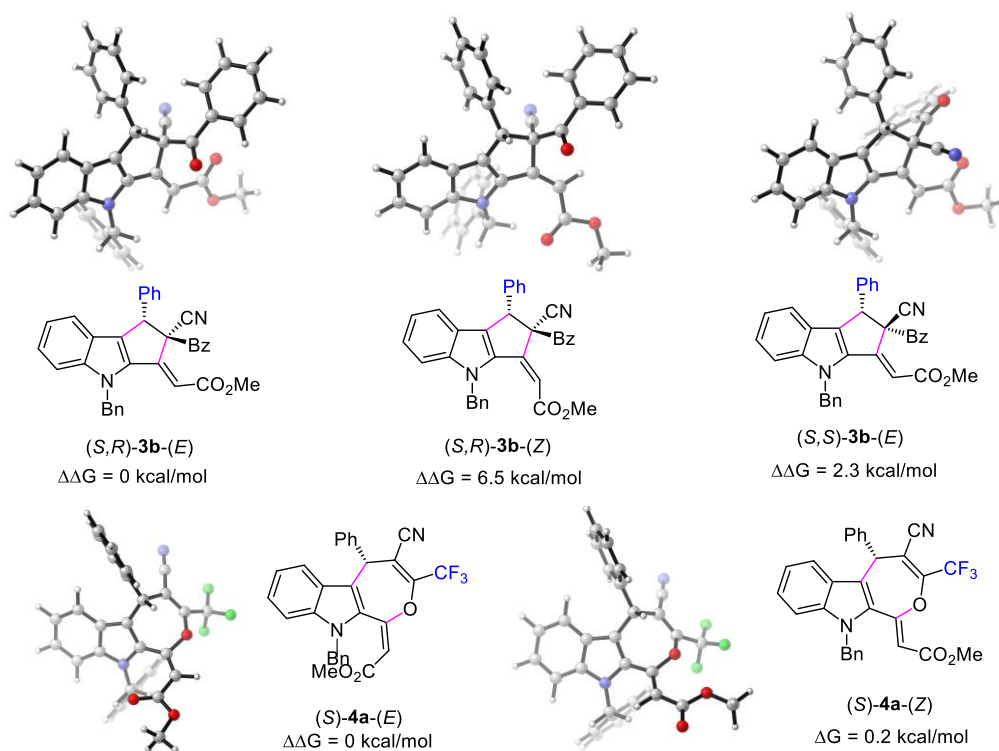

Since the Pd complex would not be involved in the final annulation process, thermodynamic stability of several possible stereoselective products, including (S,R)-**3b**-(E), (S,R)-**3b**-(Z), (S,S)-**3b**-(E), (S)-**4a**-(E) and (S)-**4a**-(Z), were calculated via DFT studies. Among the three possible formal [3 + 2] products, (S,R)-**3b**-(E) has the lowest energy; on the other hand, (S)-**4a**-(E) possesses lower energy compared with (S)-**4a**-(Z). The results indicates that the two products would be thermodynamically more stable, thus they are obtained as the major products in cascade reactions.

## 7) IRC calculations for all transition states

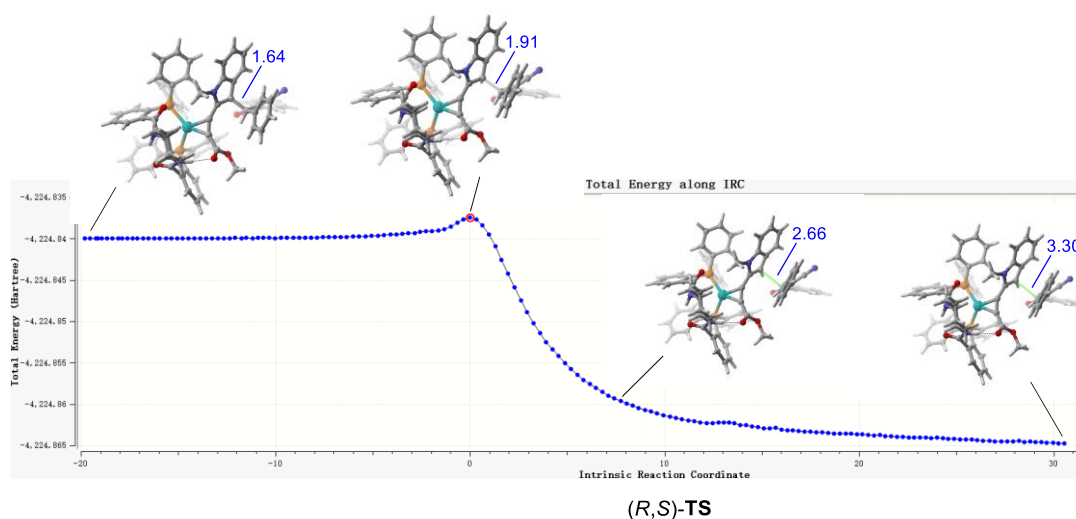

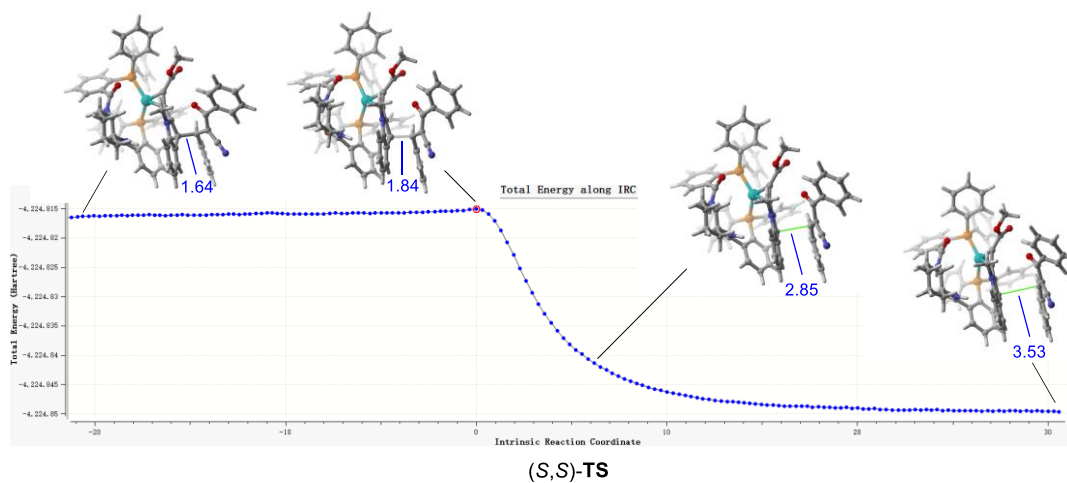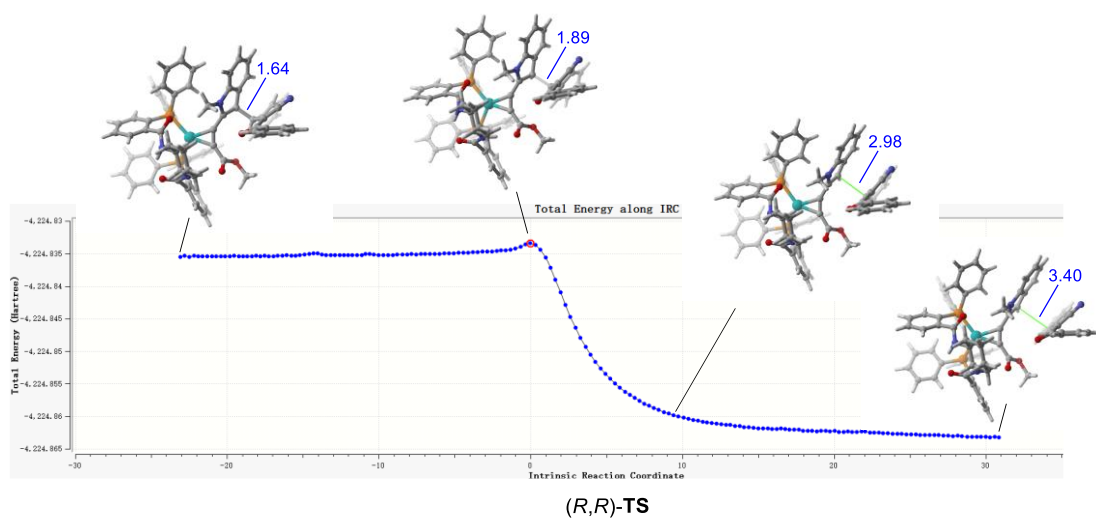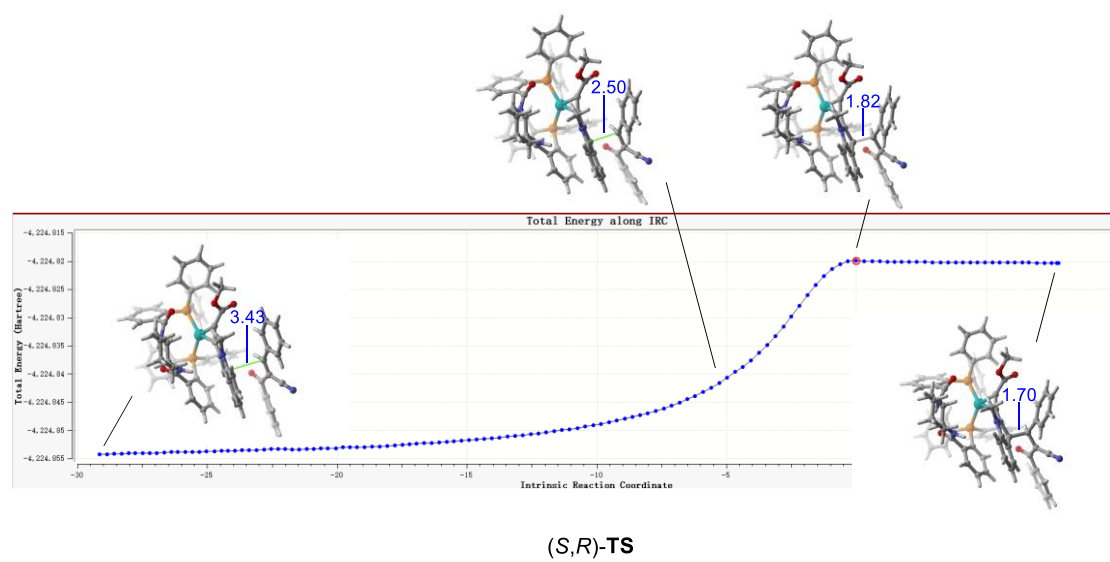

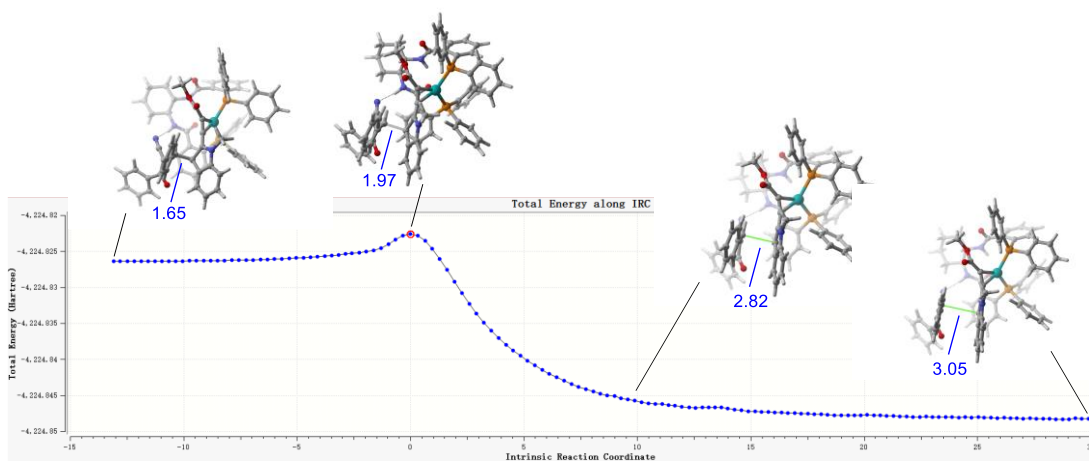

(R,S)-TS-II

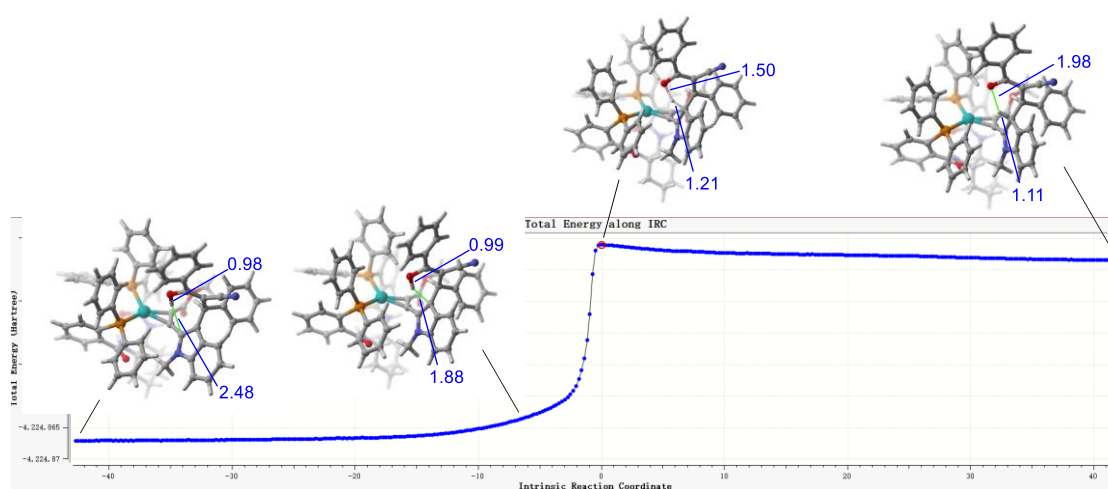

(R,S)-TS2

## (7) Proposed mechanism

### (a) The reaction of indoles with a 2-alkynyl group

On the basis of the above results and the absolute configuration of enantiopure **3i**, a possible reaction pathway was proposed. Firstly, alkyne **1b** coordinates with Pd(0) to generate HOMO raised  $\eta^2$ -complex **I**, in which the NH group of **L1** interact with the carbonyl group of **1a** via H-bonding. Then the 3-position of the indole attacks enone **2h** from *Re*-face. The resultant  $\eta^3$ -complex **II** would undergoes an intramolecular 1,5-proton transfer to give intermediate **III**, and the hydroxyl group of the enol moiety might interact with the carbonyl of the propiolate group of **III**, thus facilitating the intramolecular Michael reaction to give thermodynamically more stable product **3i** with an *exo-E*-double bond.

### Proposed mechanism

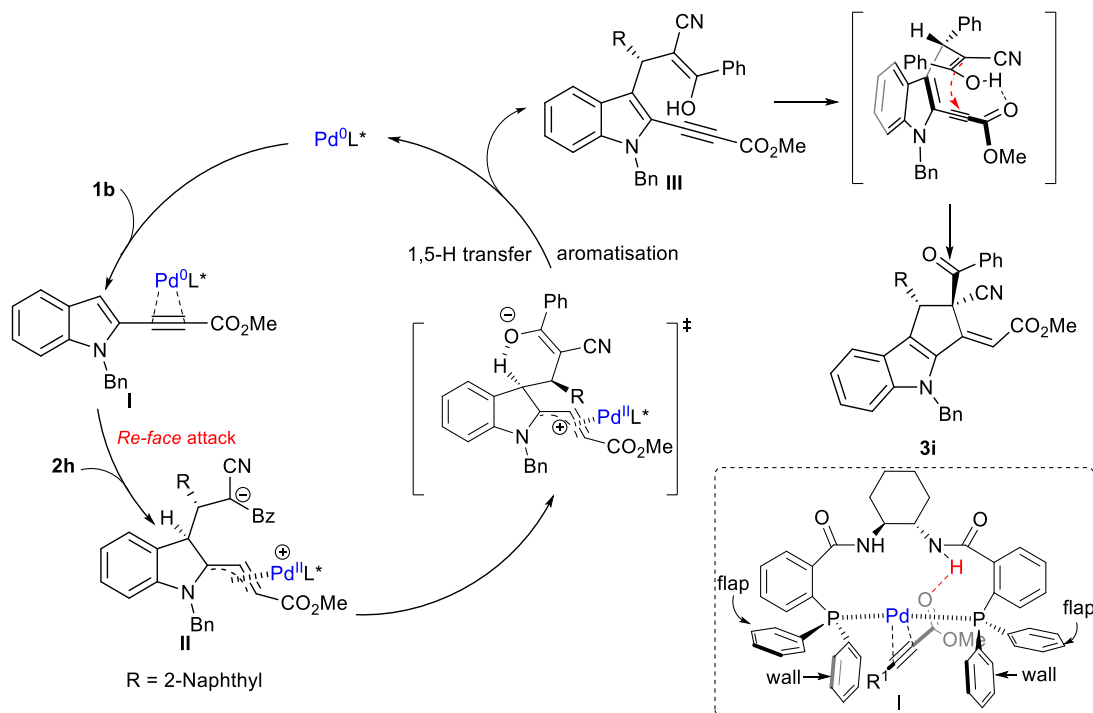

### (b) The reaction of indoles with a 2-alkenyl group

Similarly, the mechanism for the FC reaction of **7a** was proposed as well. Firstly, alkene **7a** coordinates with Pd(0) to generate HOMO raised  $\eta^2$ -complex **I'**. Then the 3-position of the indole attacks imine **8a** which is activated by the acid additive from *Si*-face, followed by a  $\beta$ -H elimination or deprotonation process to give final product **9a**.

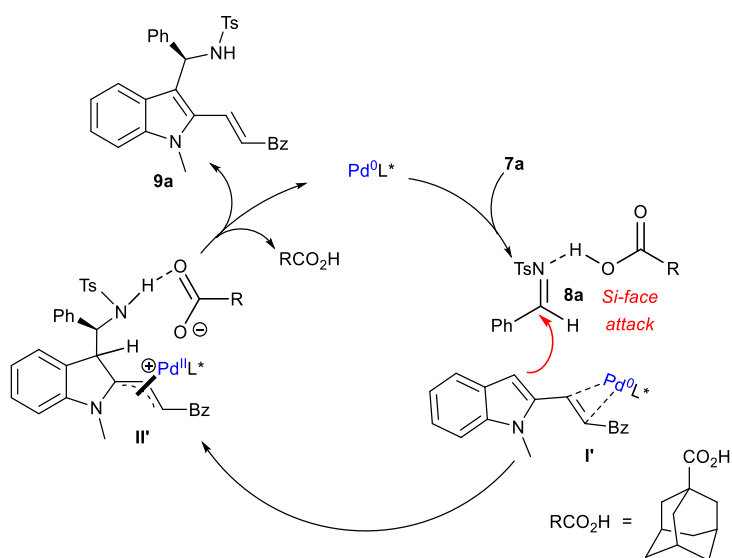

### (8) Influence of ammonium salts

For additive TBAB, we conducted more control experiments to elucidate its role. As shown in the following table, the addition of TBAB significantly improved the yield (entry 1 vs 2). Under the

optimised conditions, TBAC, TBAI and even TBAHS (tetrabutylammonium hydrogen sulfate) all provided comparable results (entries 4–6 vs entry 3), while KBr showed much lower reactivity (entry 7). The results indicated the ammonium cation was important to the reactivity, while the counter anion had little effect.

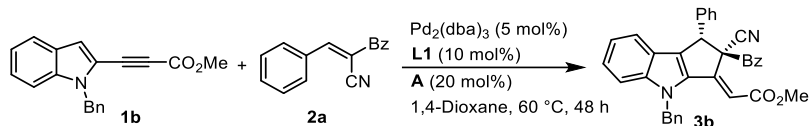

| Entry <sup>a</sup> | A     | Yield (%) <sup>b</sup> | ee (%) <sup>c</sup> |
|--------------------|-------|------------------------|---------------------|
| 1                  | /     | <b>3b</b> , 49         | 92                  |
| 2                  | TBAB  | <b>3b</b> , 70         | 91                  |
| 3 <sup>d,e</sup>   | TBAB  | <b>3b</b> , 86         | 92                  |
| 5 <sup>d,e</sup>   | TBAC  | <b>3b</b> , 76         | 92                  |
| 4 <sup>d,e</sup>   | TBAI  | <b>3b</b> , 81         | 91                  |
| 6 <sup>d,e</sup>   | TBAHS | <b>3b</b> , 79         | 90                  |
| 7 <sup>d,e</sup>   | KBr   | <b>3b</b> , 52         | 92                  |

<sup>a</sup>Unless noted otherwise, reactions were carried out with **1b** (0.025 mmol), **2a** (0.03 mmol), Pd<sub>2</sub>(dba)<sub>3</sub> (5 mol%), **L1** (10 mol%) and additive **A** (20 mol%) in solvent (0.25 mL) at 60 °C under Ar. <sup>b</sup>Yield of the isolated product. <sup>c</sup>Determined by HPLC analysis on a chiral stationary phase. <sup>d</sup>C = 0.2 M. <sup>e</sup>The ratio of **1b/2a** was 1/1.3.

Therefore, we speculated that the ammonium salt might facilitate the reaction by stabilising intermediate **II** as a counterion for the enolate motif after FC addition to acceptor **2**, as outlined in the following scheme.

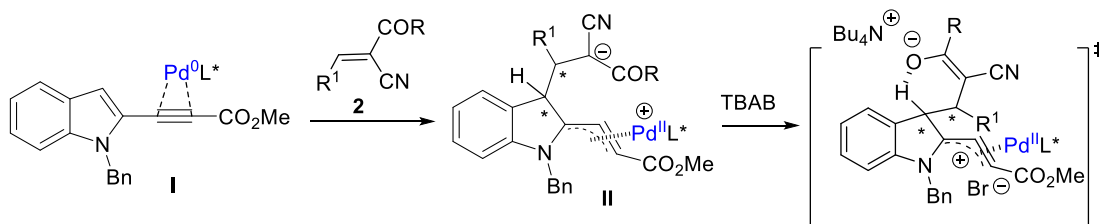

# 18. NMR, HRMS spectra and HPLC chromatograms

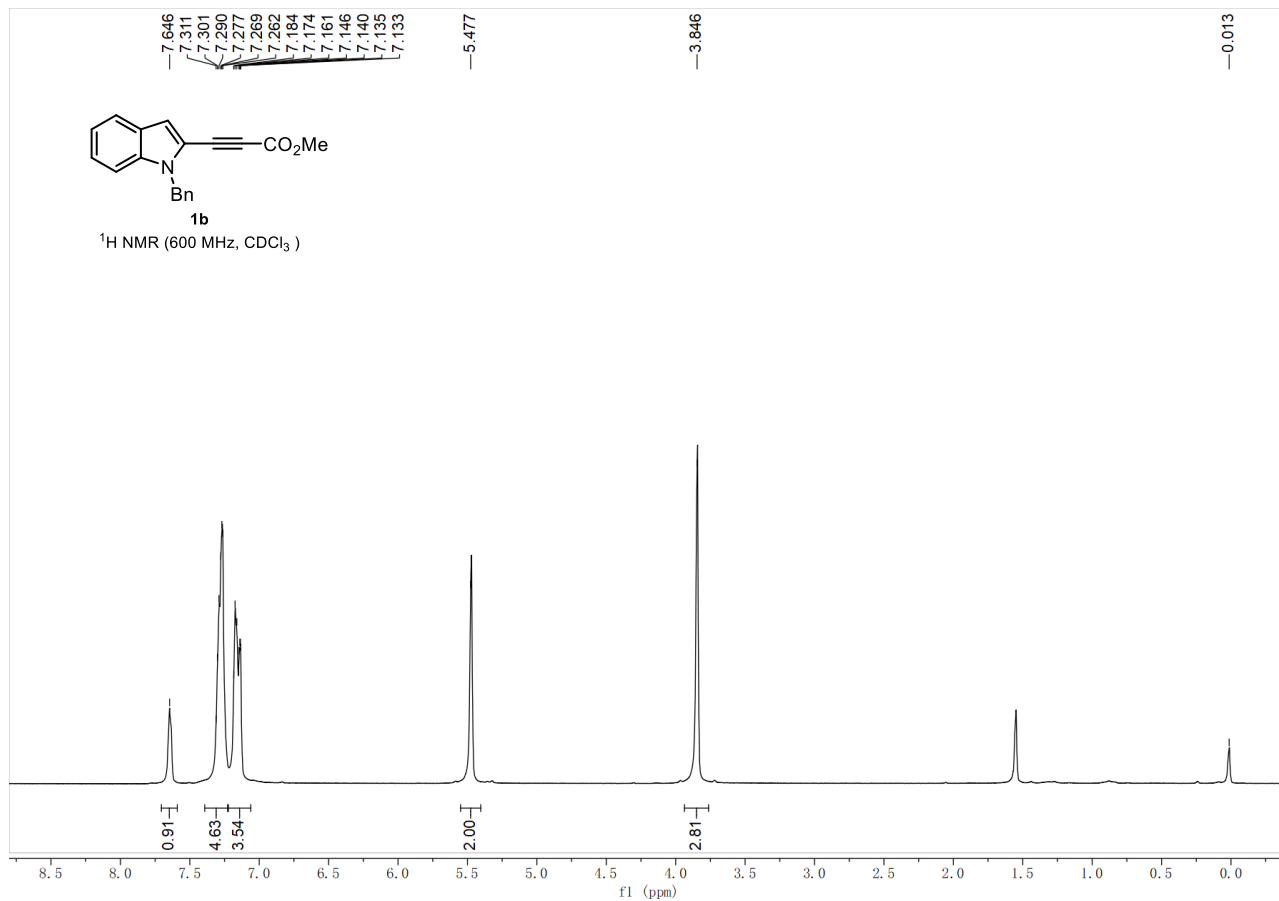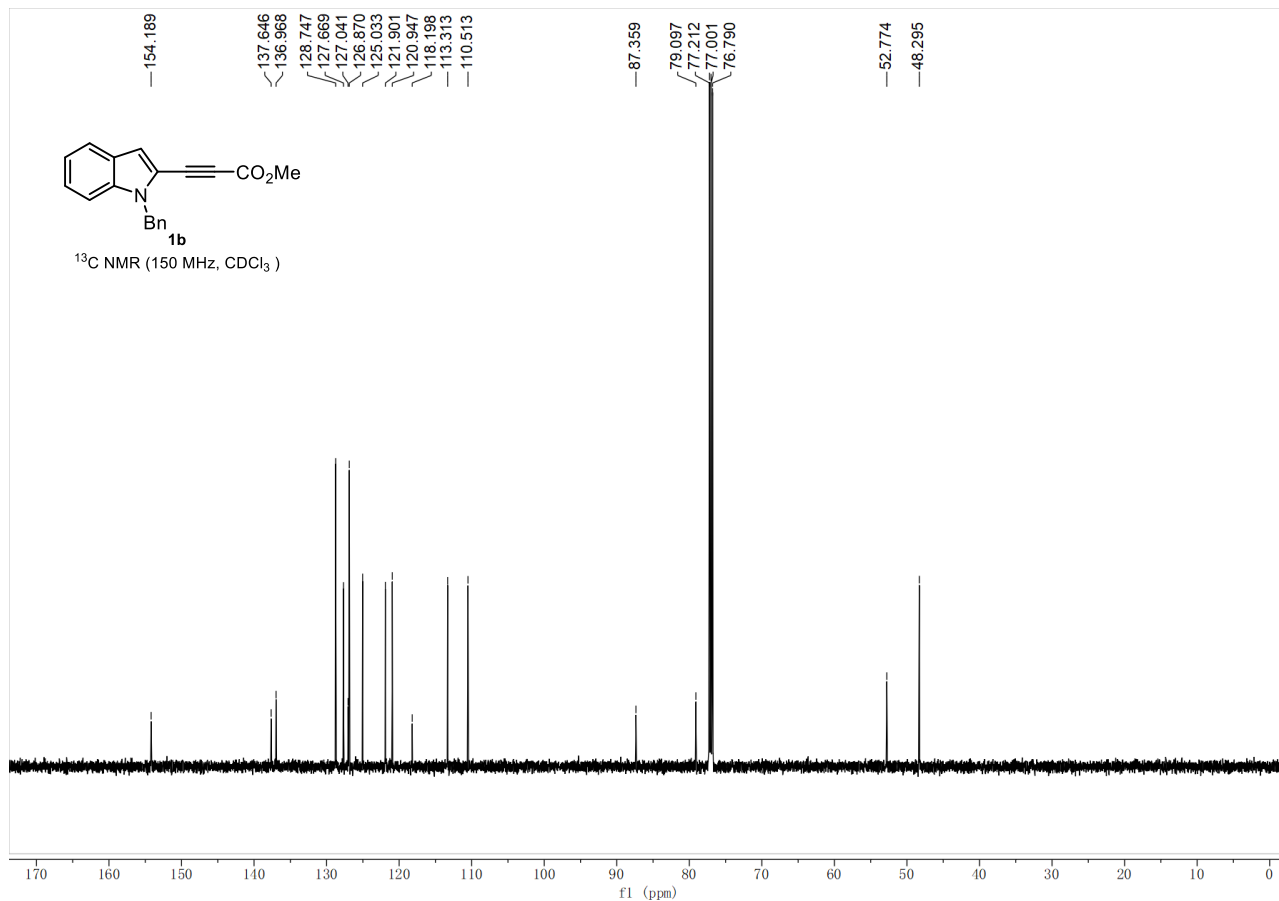

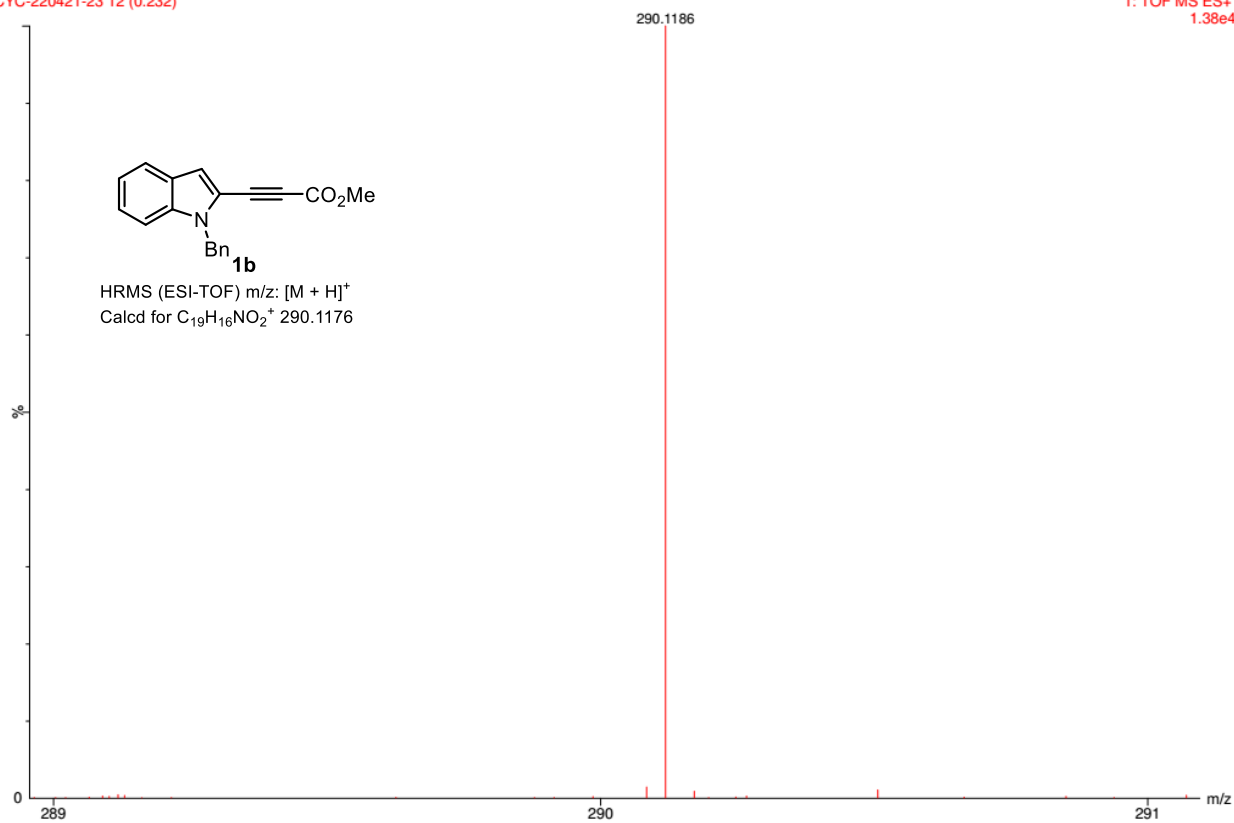



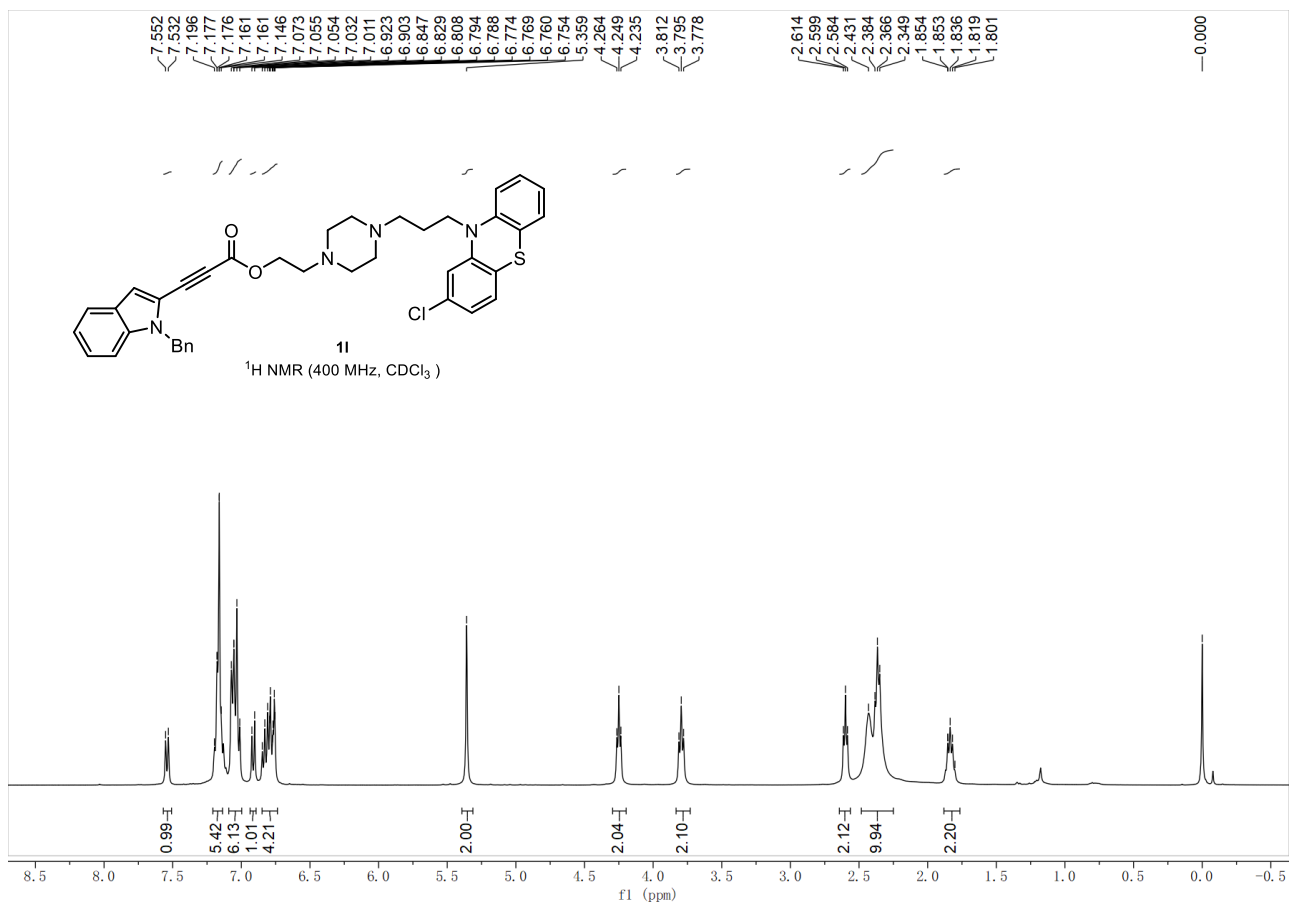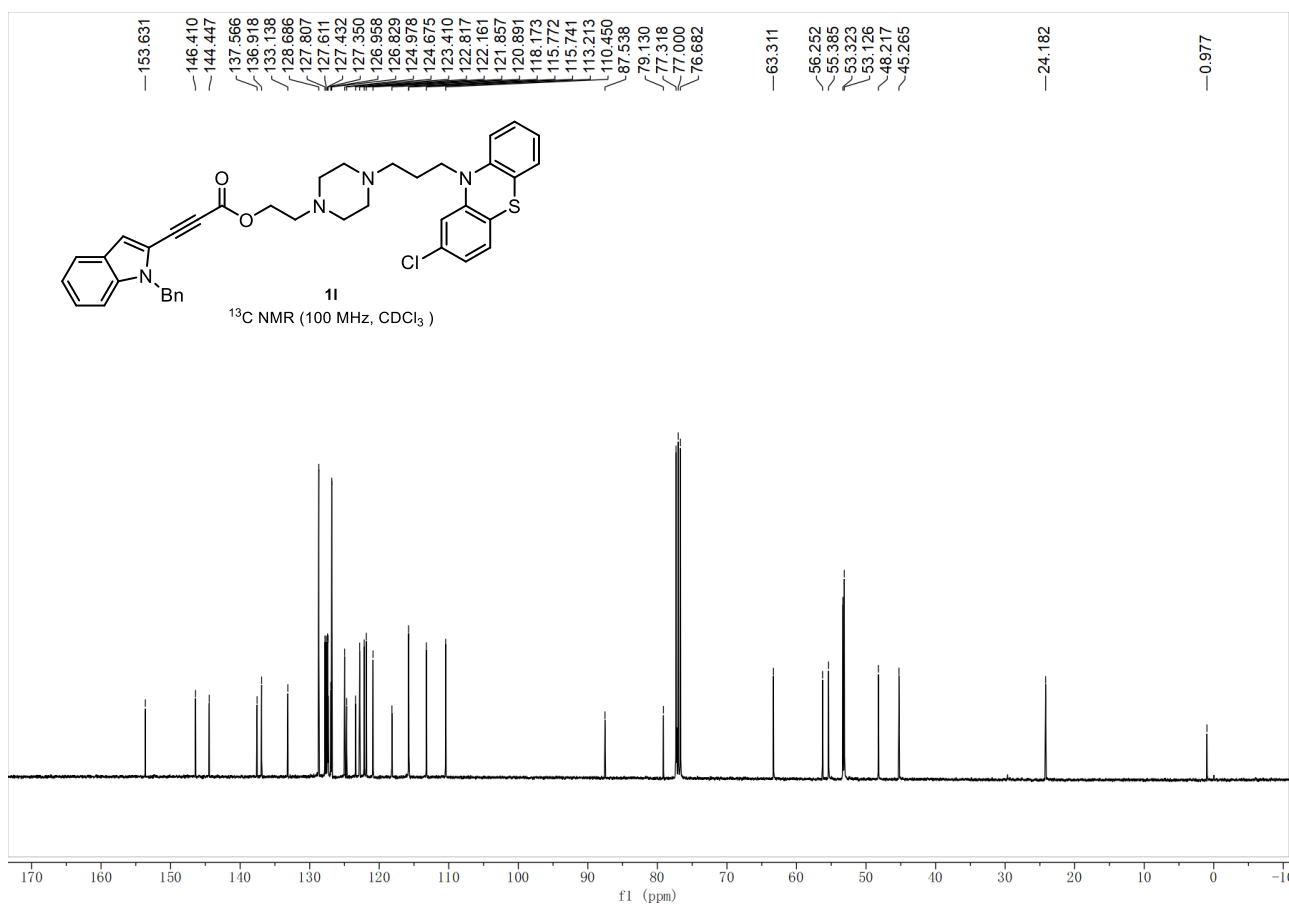

Name: CYC-220509-18 Rack Pos.: Plate Pos.: Instrument: Instrument 1 Operator  
Inj. Vol. (ul): 8 8 Success  
Data File: CYC-220509-18.d Method (Acq): ZYJ-20201106.m Comment: Acq. Time (Local) 5/11/2022 5:00:48 PM  
(UTC+08:00)

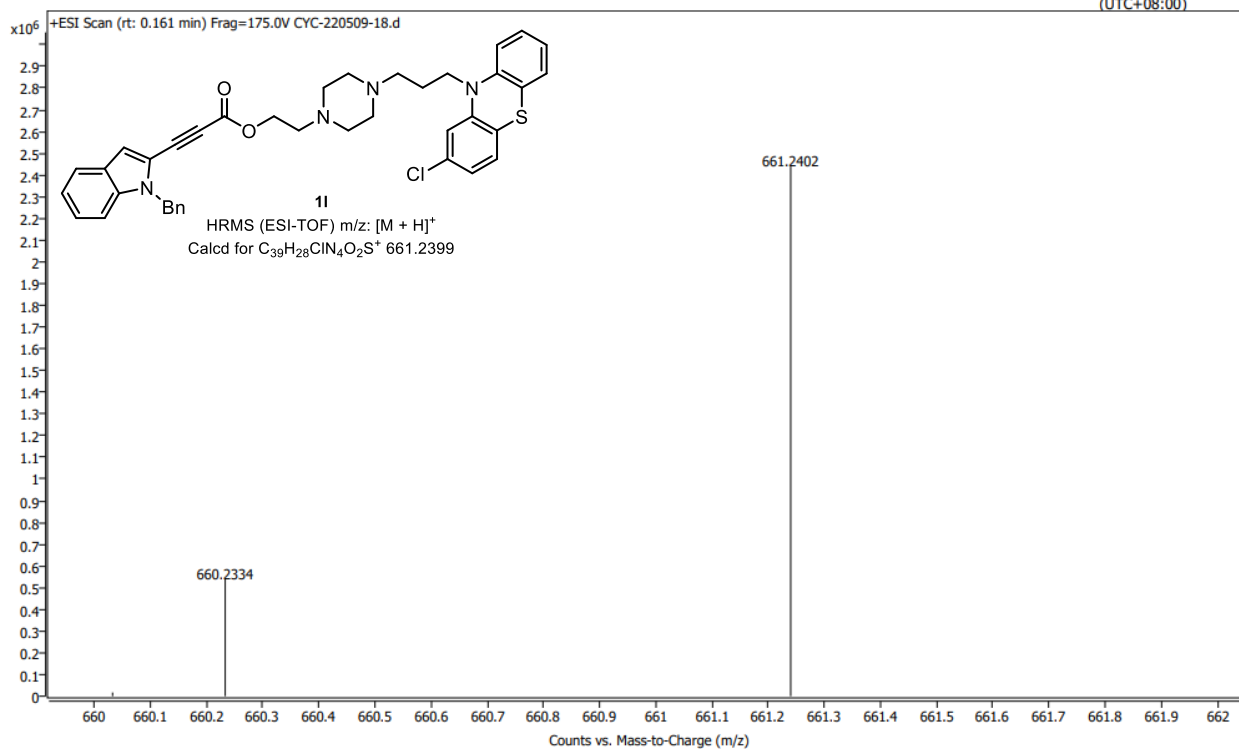

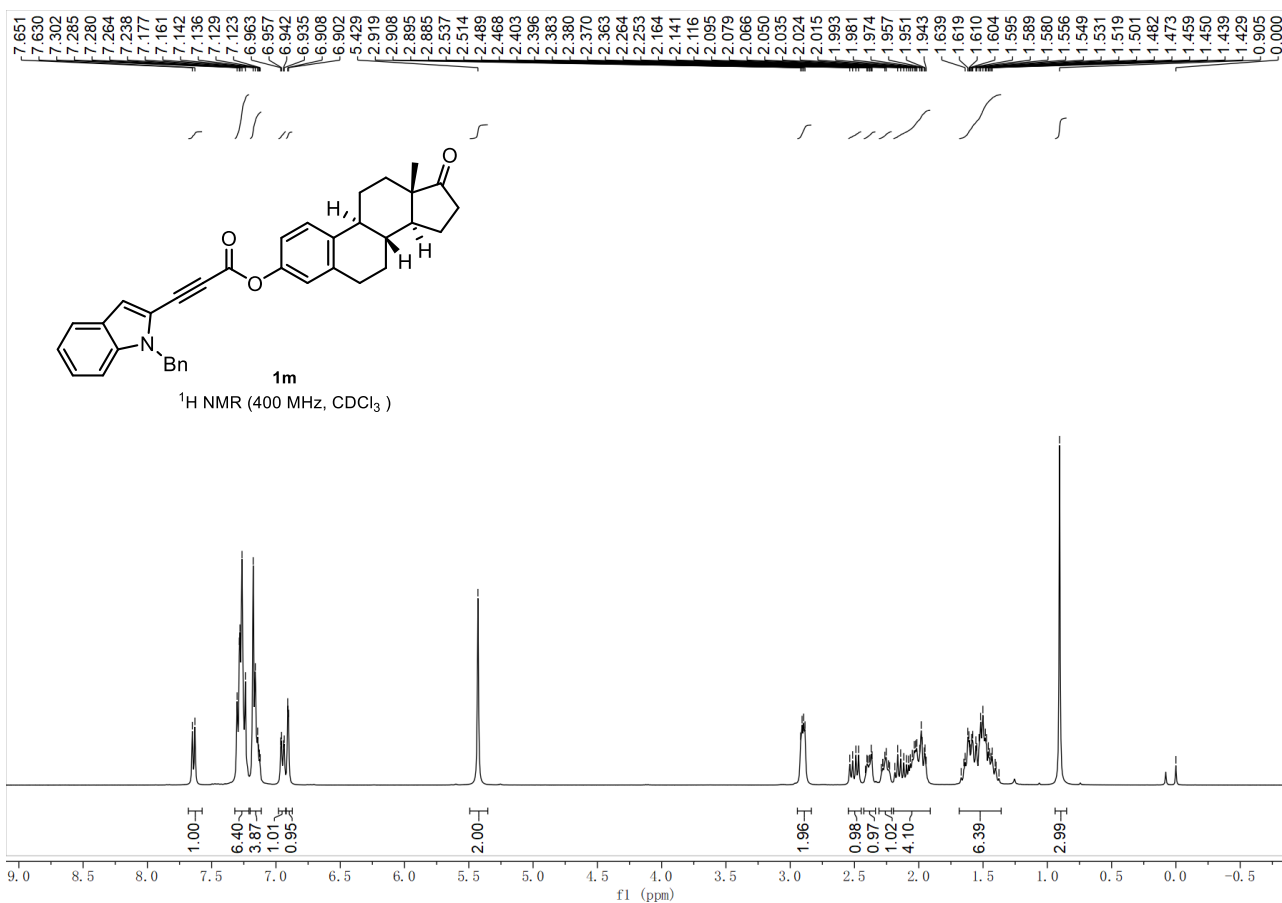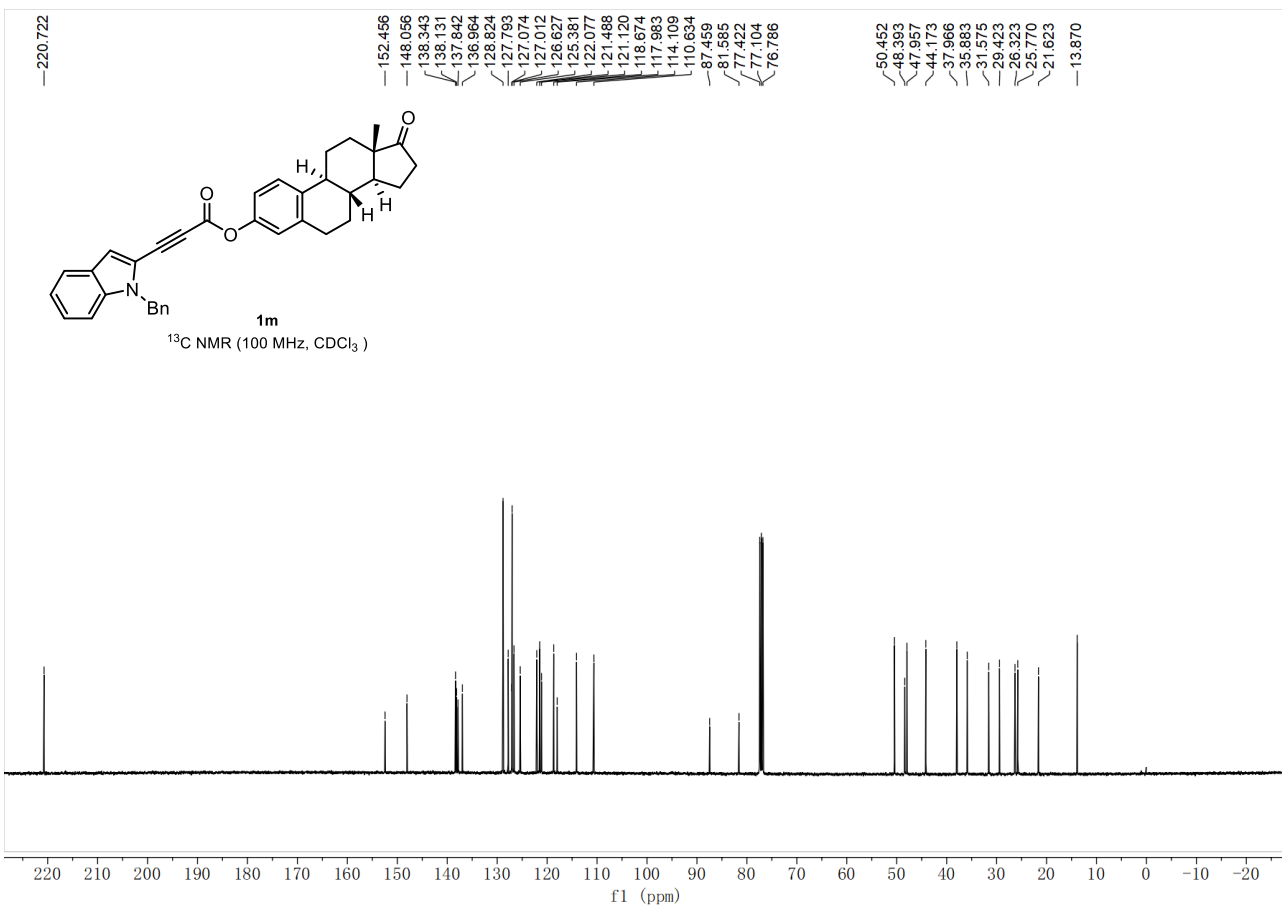

|                |                 |              |                |            |              |                   |                                  |
|----------------|-----------------|--------------|----------------|------------|--------------|-------------------|----------------------------------|
| Name           | CYC-220509-17   | Rack Pos.    |                | Instrument | Instrument 1 | Operator          |                                  |
| Inj. Vol. (ul) | 8               | Plate Pos.   |                | IRM Status | Success      |                   |                                  |
| Data File      | CYC-220509-17.d | Method (Acq) | ZYJ-20201106.m | Comment    |              | Acq. Time (Local) | 5/11/2022 4:57:51 PM (UTC+08:00) |

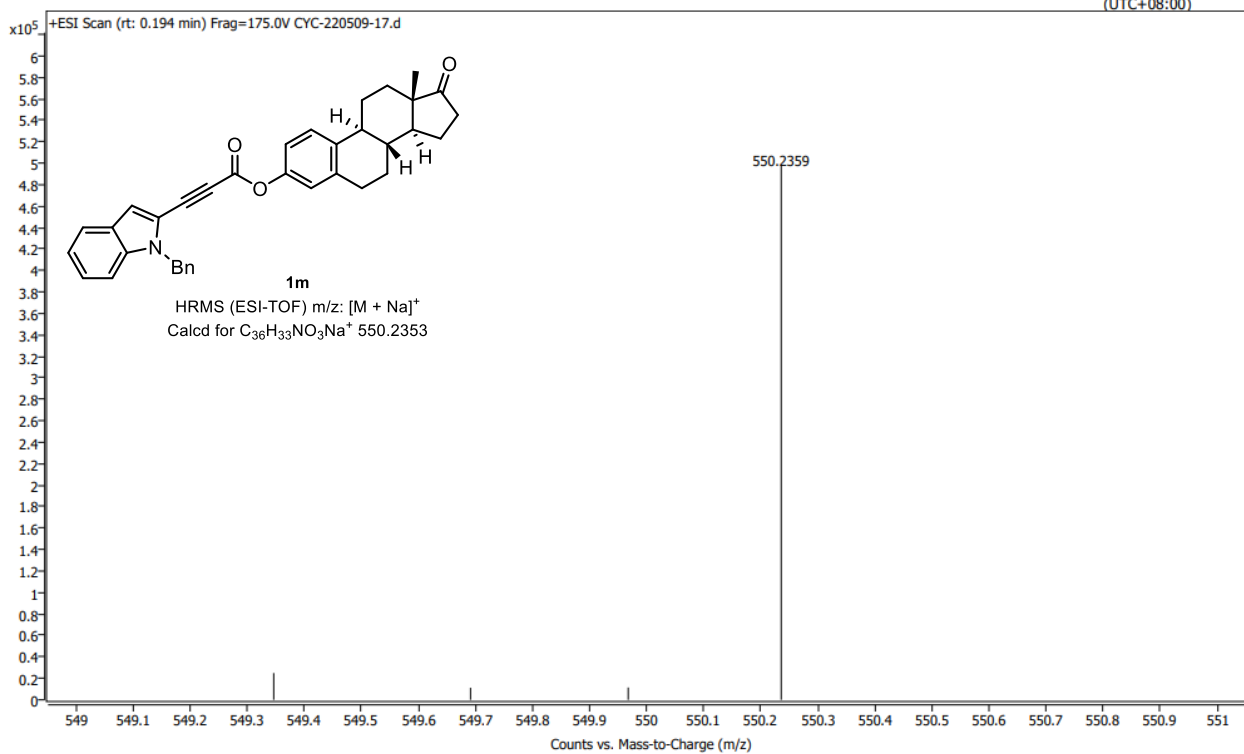

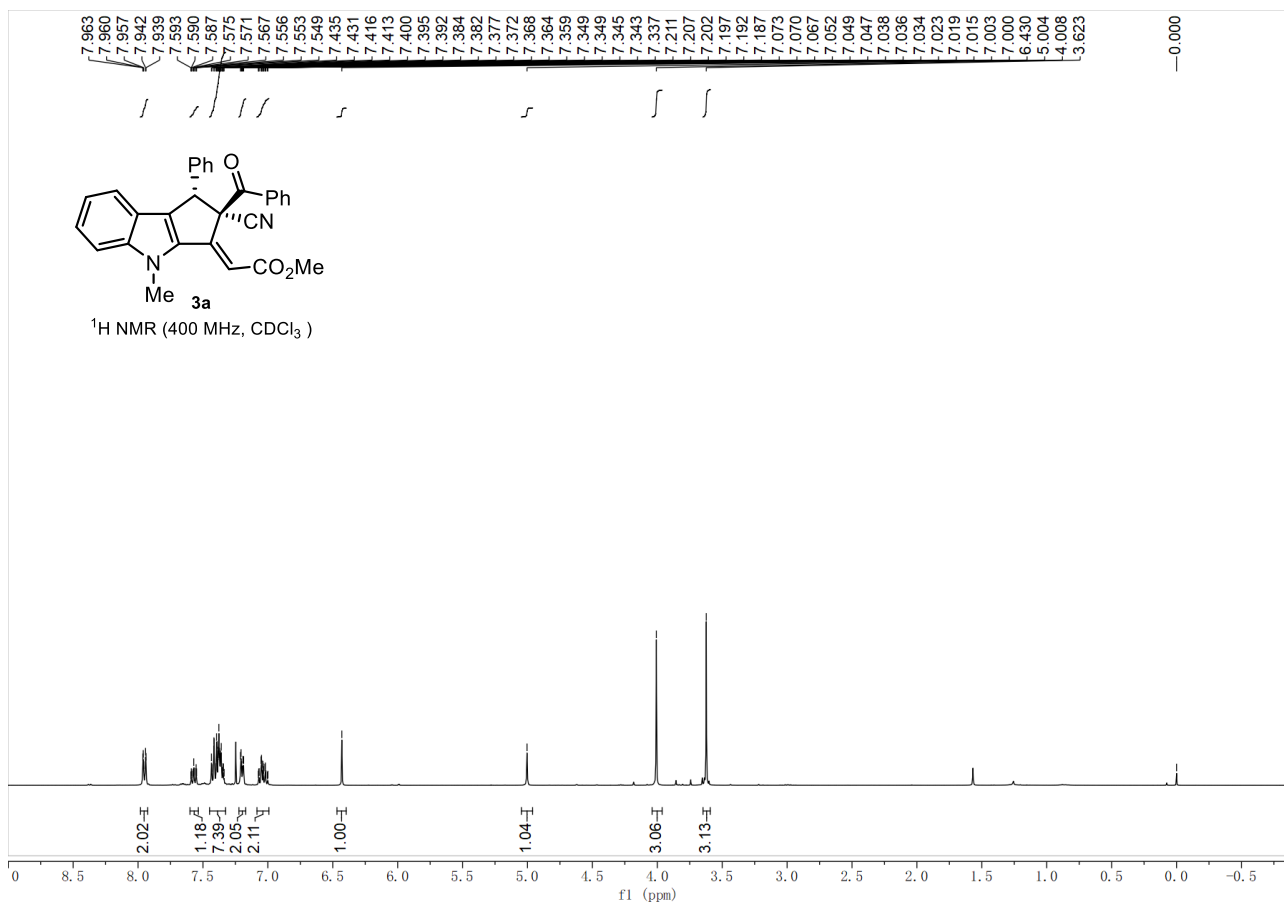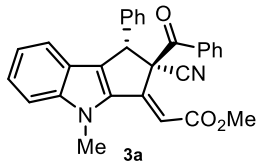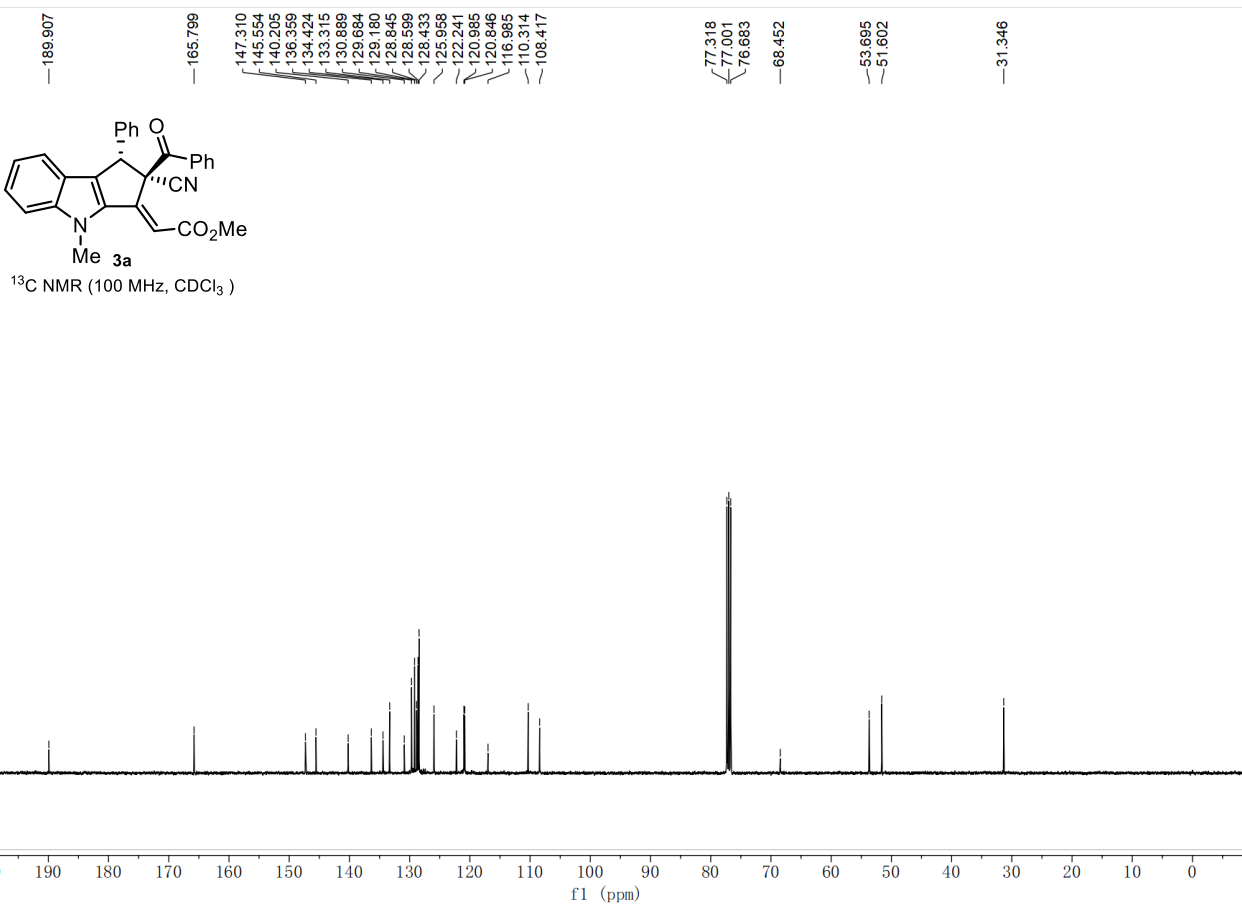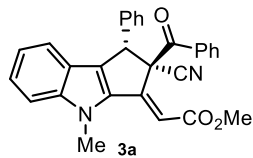

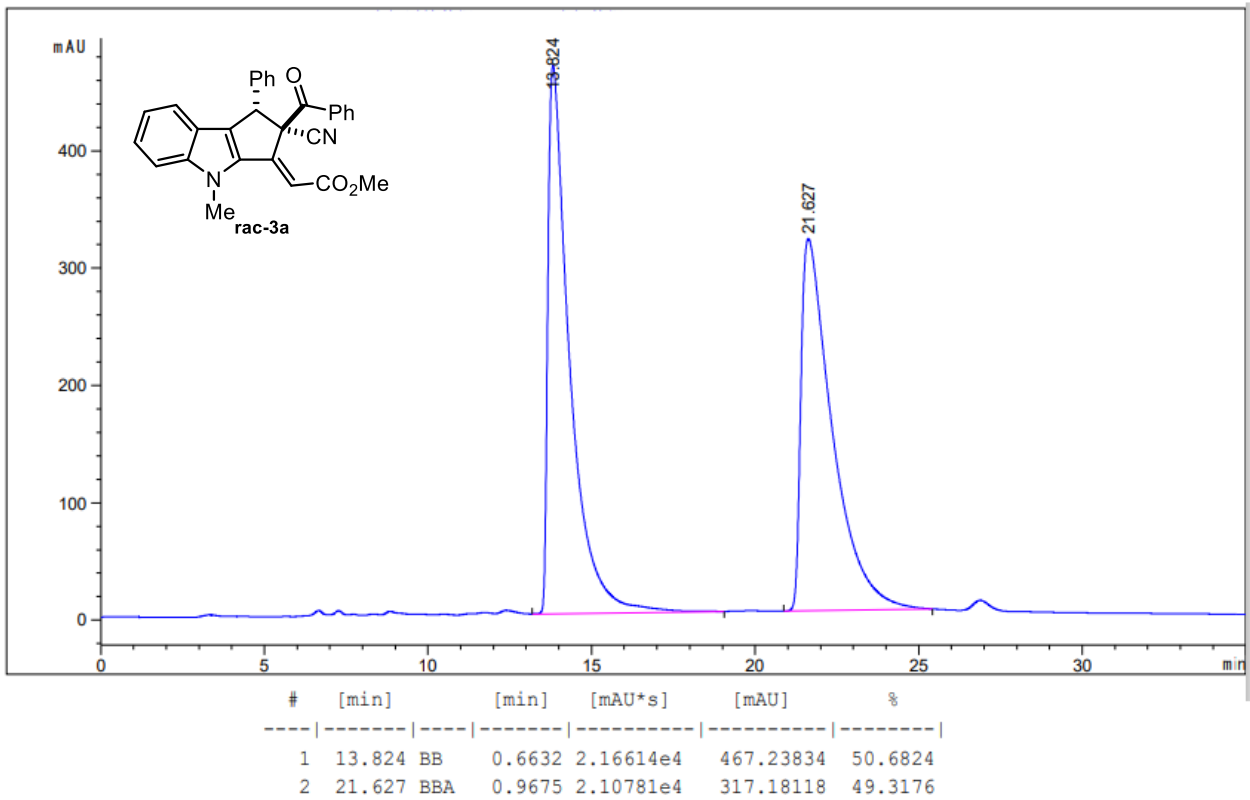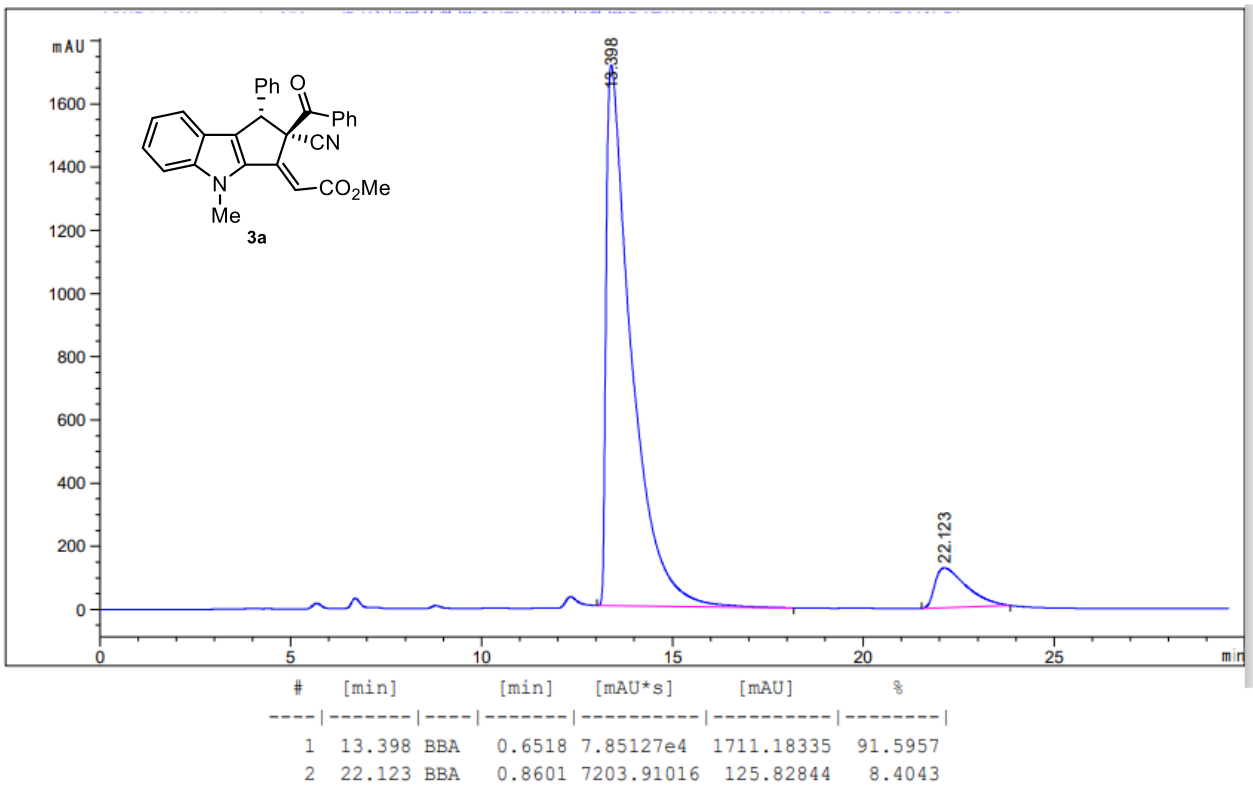

|                |                 |              |                |            |                  |                                                    |
|----------------|-----------------|--------------|----------------|------------|------------------|----------------------------------------------------|
| Name           | CYC-220406-50   | Rack Pos.    |                | Instrument | Instrument 1     | Operator                                           |
| Inj. Vol. (ul) | 8               | Plate Pos.   |                | IRM Status | Some ions missed |                                                    |
| Data File      | CYC-220406-50.d | Method (Acq) | ZYJ-20201106.m | Comment    |                  | Acq. Time (Local) 4/9/2022 11:30:41 AM (UTC+08:00) |

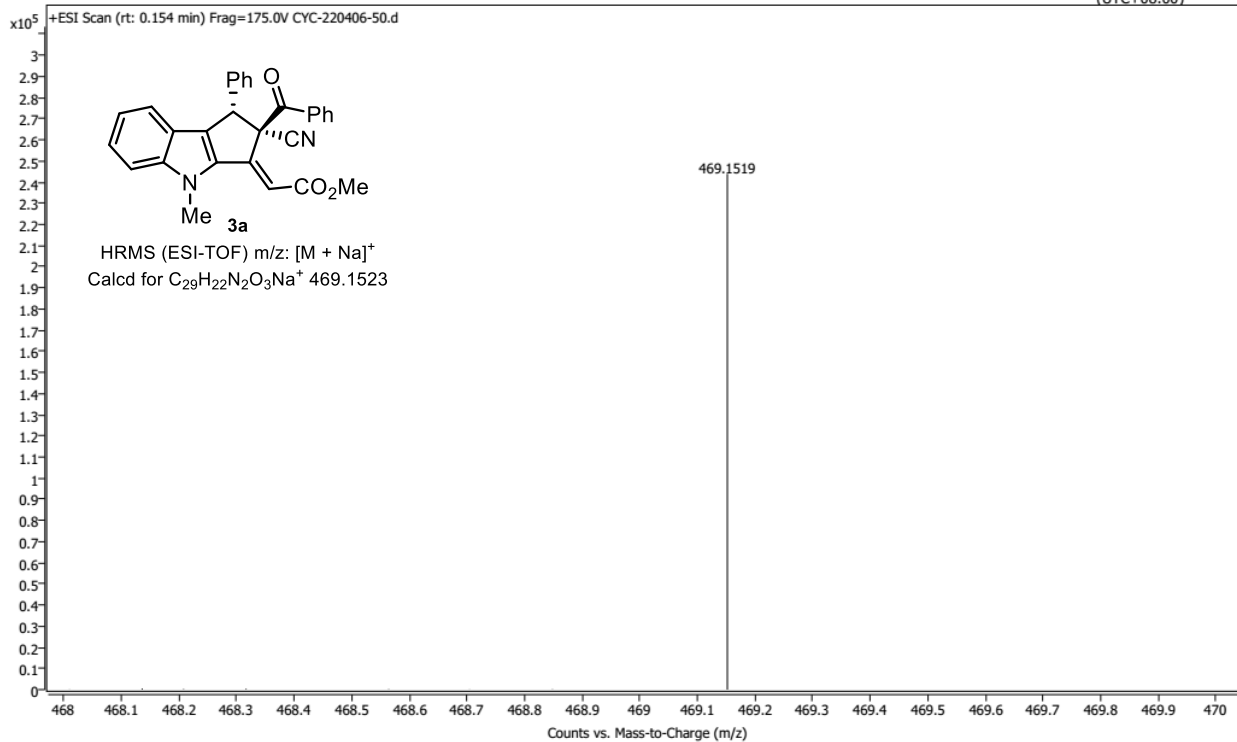

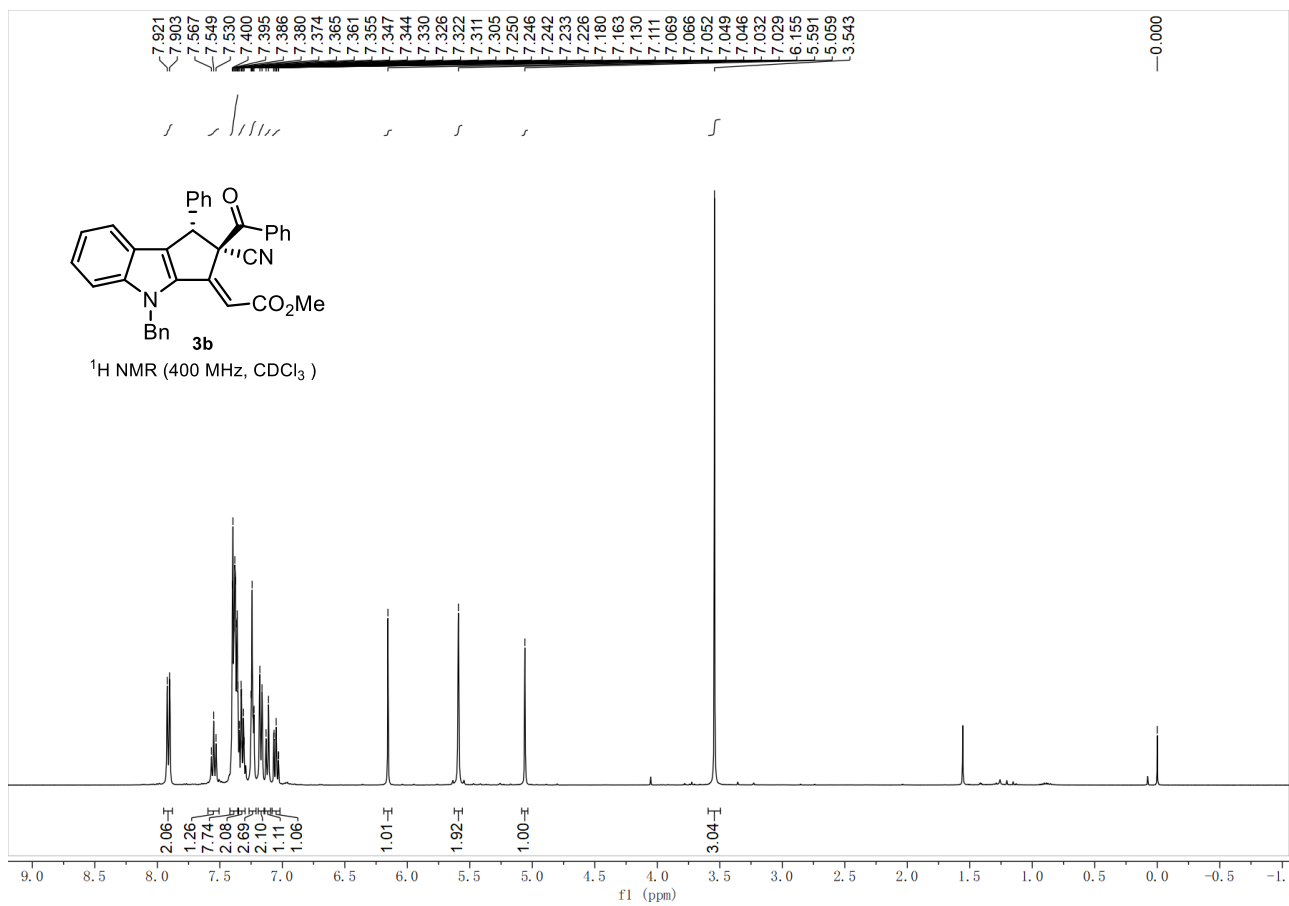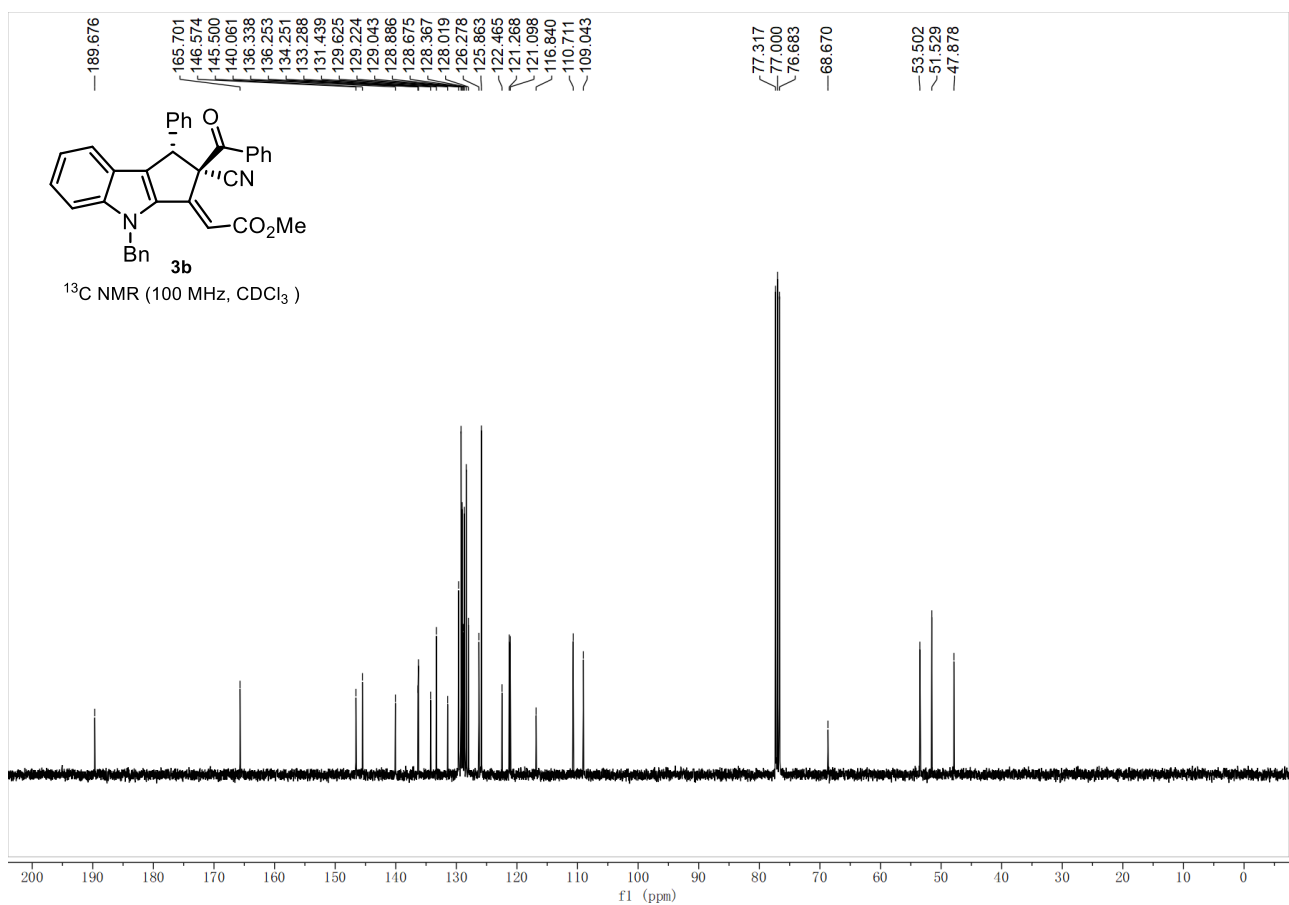



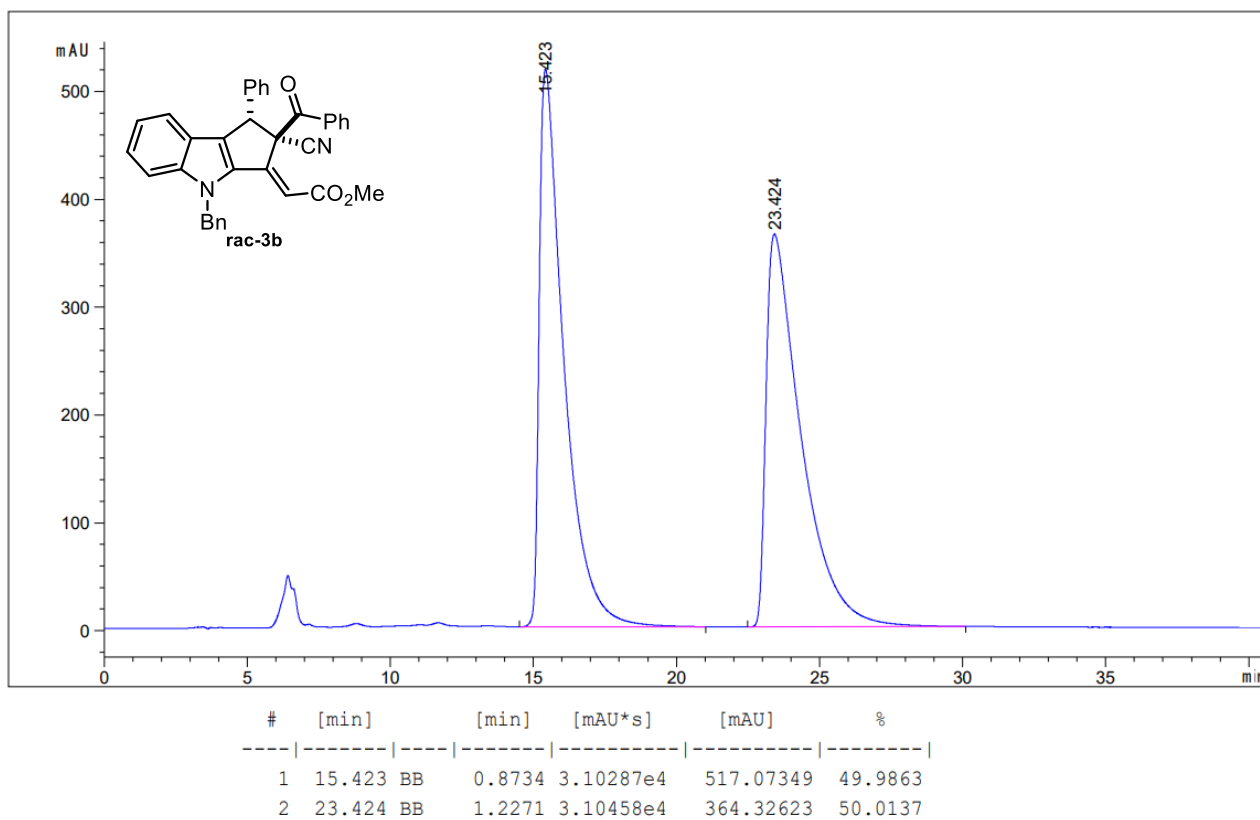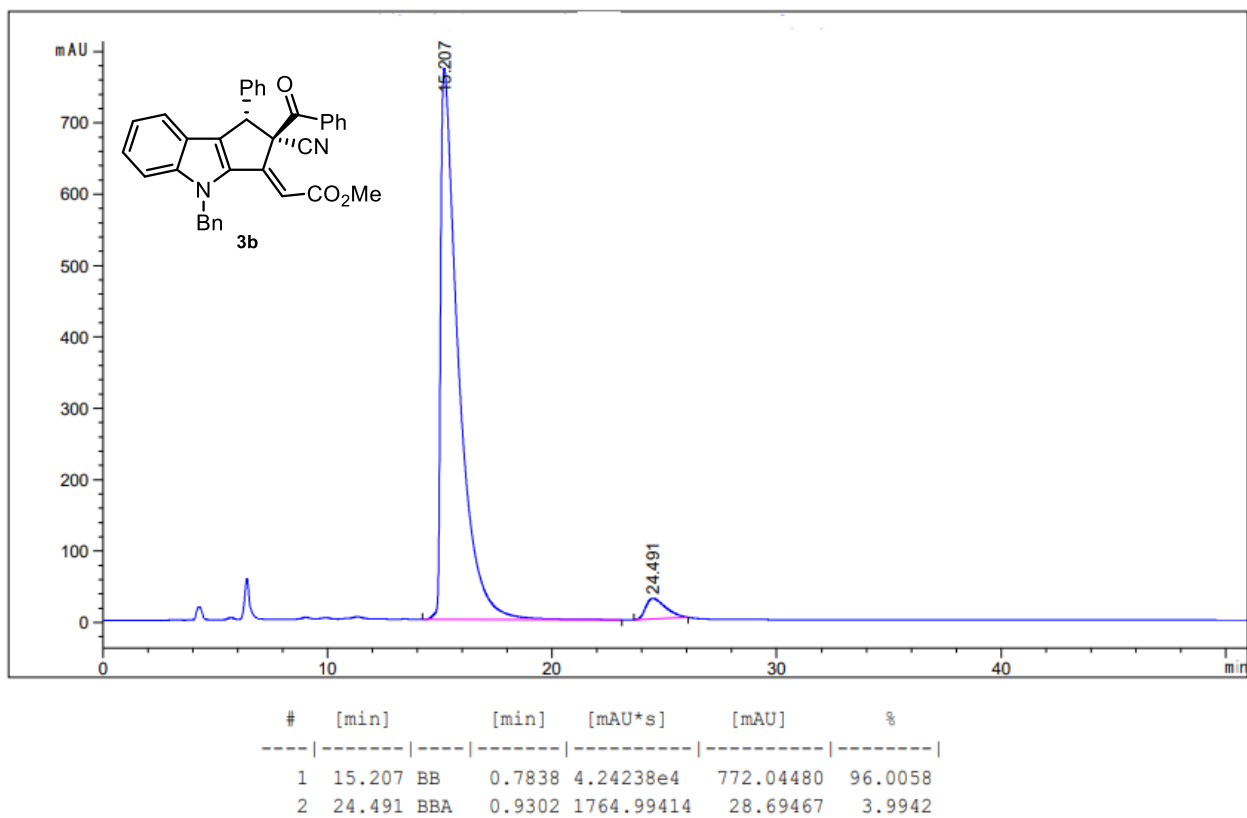

Name: CYC-220406-26      Rack Pos.: 8      Instrument: ZYJ-20201106.m      Instrument 1: Some ions missed      Operator: 4/9/2022 9:50:38 AM (UTC+08:00)  
Inj. Vol. (ul): 8      Plate Pos.:      IRM Status:      Comment:      Acq. Time (Local):  
Data File: CYC-220406-26.d      Method (Acq):

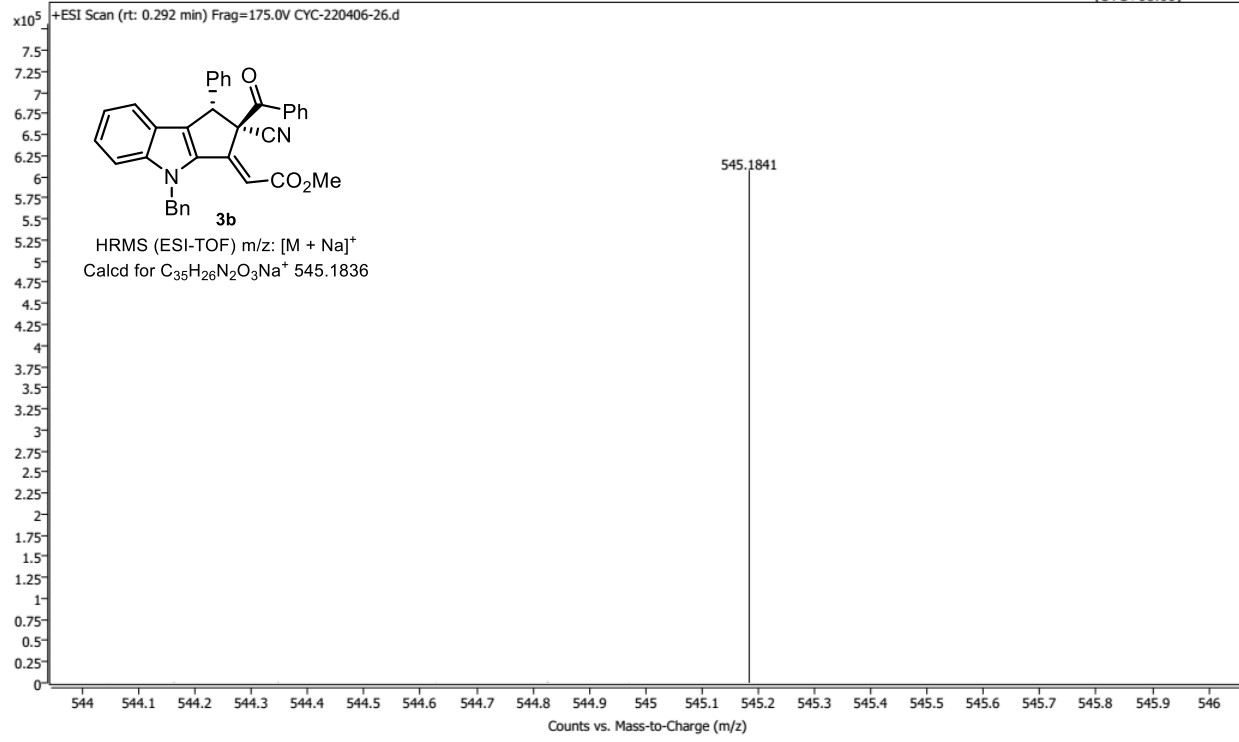

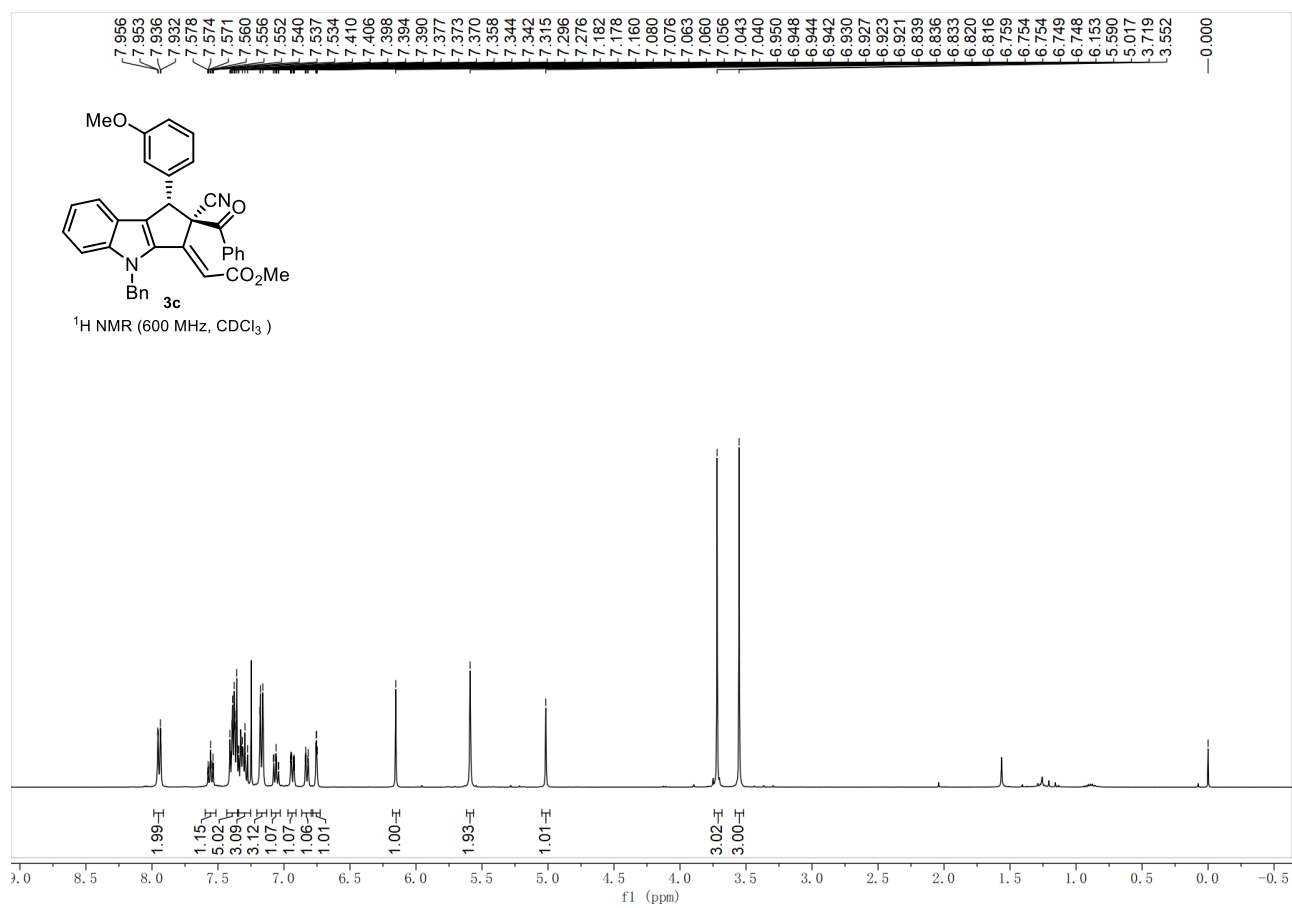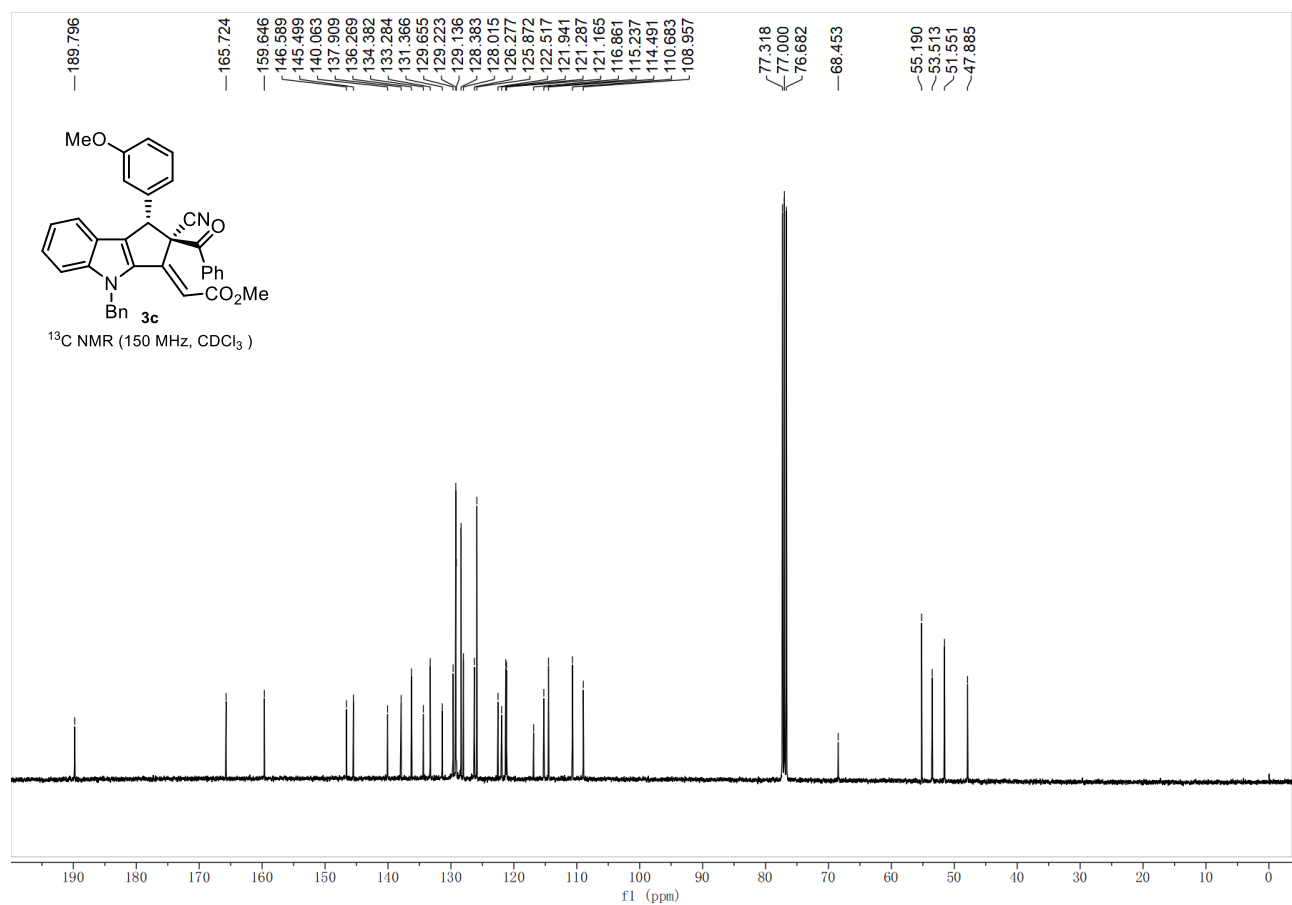

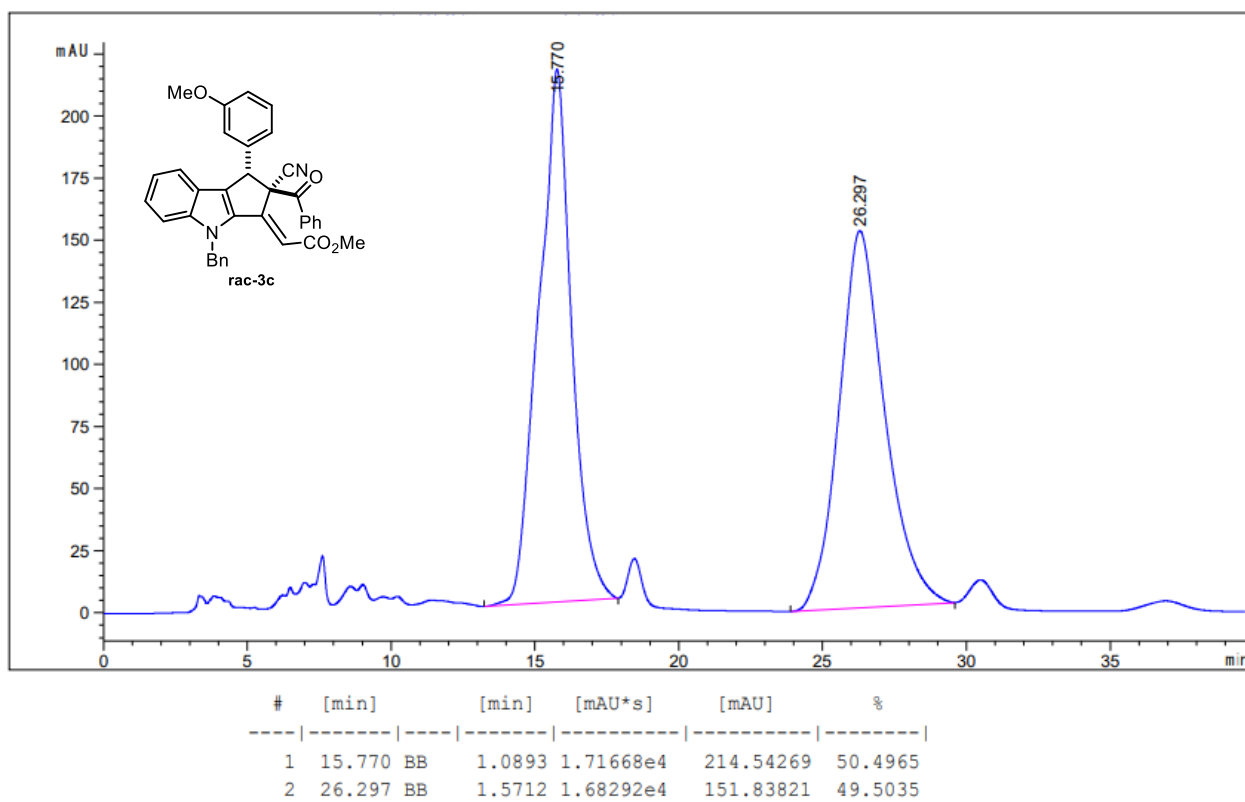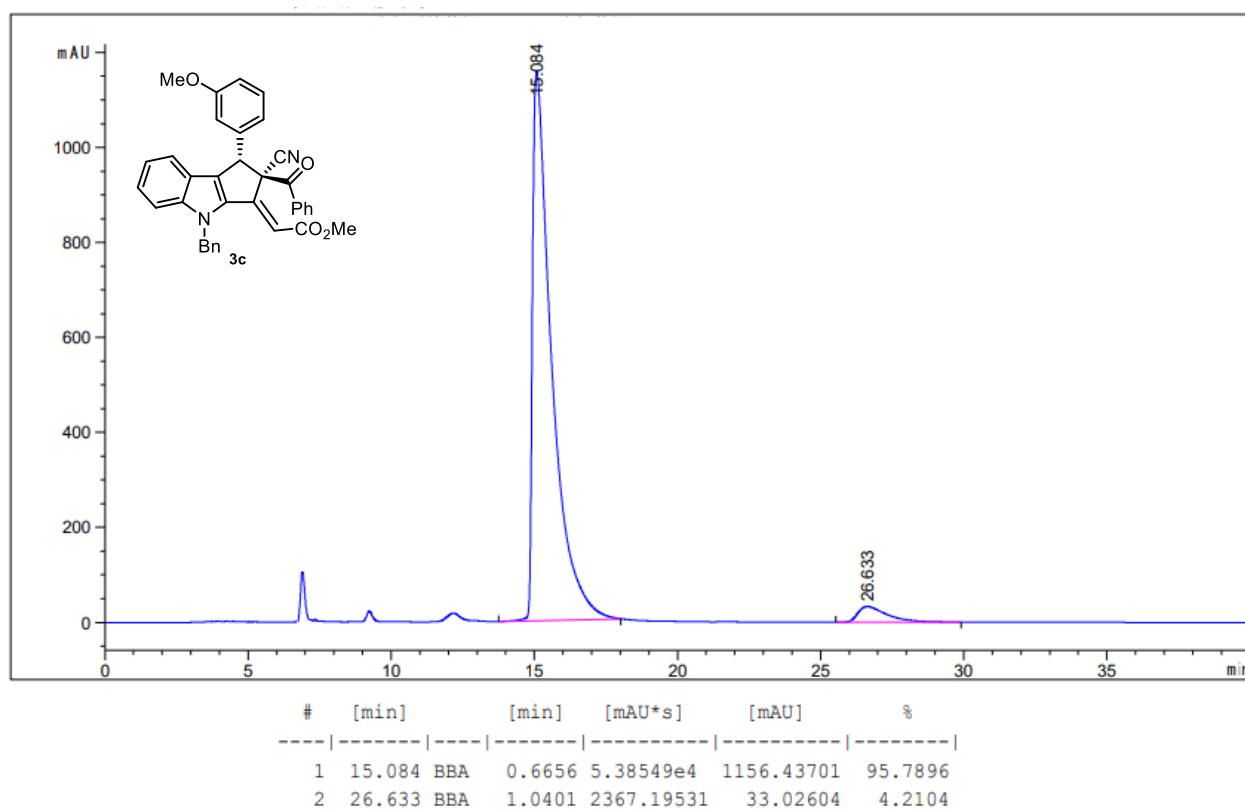

|                |                 |              |                |            |              |                                                    |
|----------------|-----------------|--------------|----------------|------------|--------------|----------------------------------------------------|
| Name           | CYC-220406-31   | Rack Pos.    |                | Instrument | Instrument 1 | Operator                                           |
| Inj. Vol. (ul) | 8               | Plate Pos.   |                | IRM Status | Success      |                                                    |
| Data File      | CYC-220406-31.d | Method (Acq) | ZYJ-20201106.m | Comment    |              | Acq. Time (Local) 4/9/2022 10:05:30 AM (UTC+08:00) |

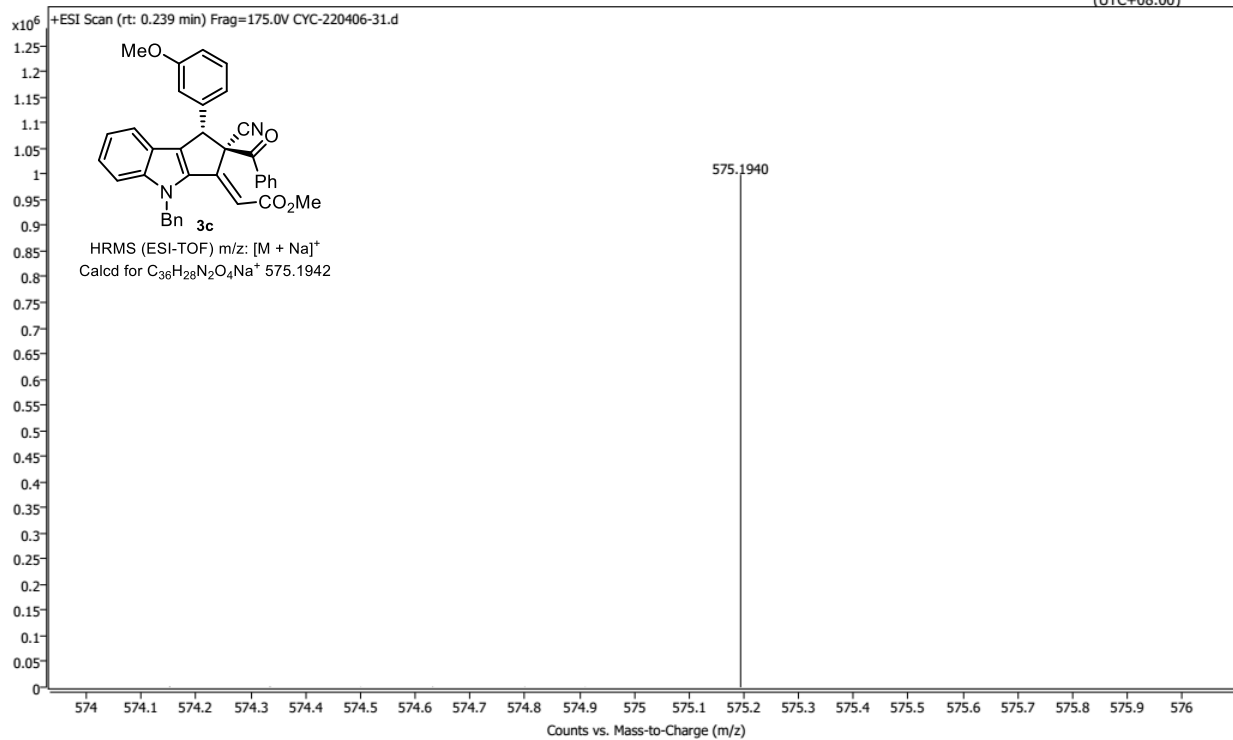

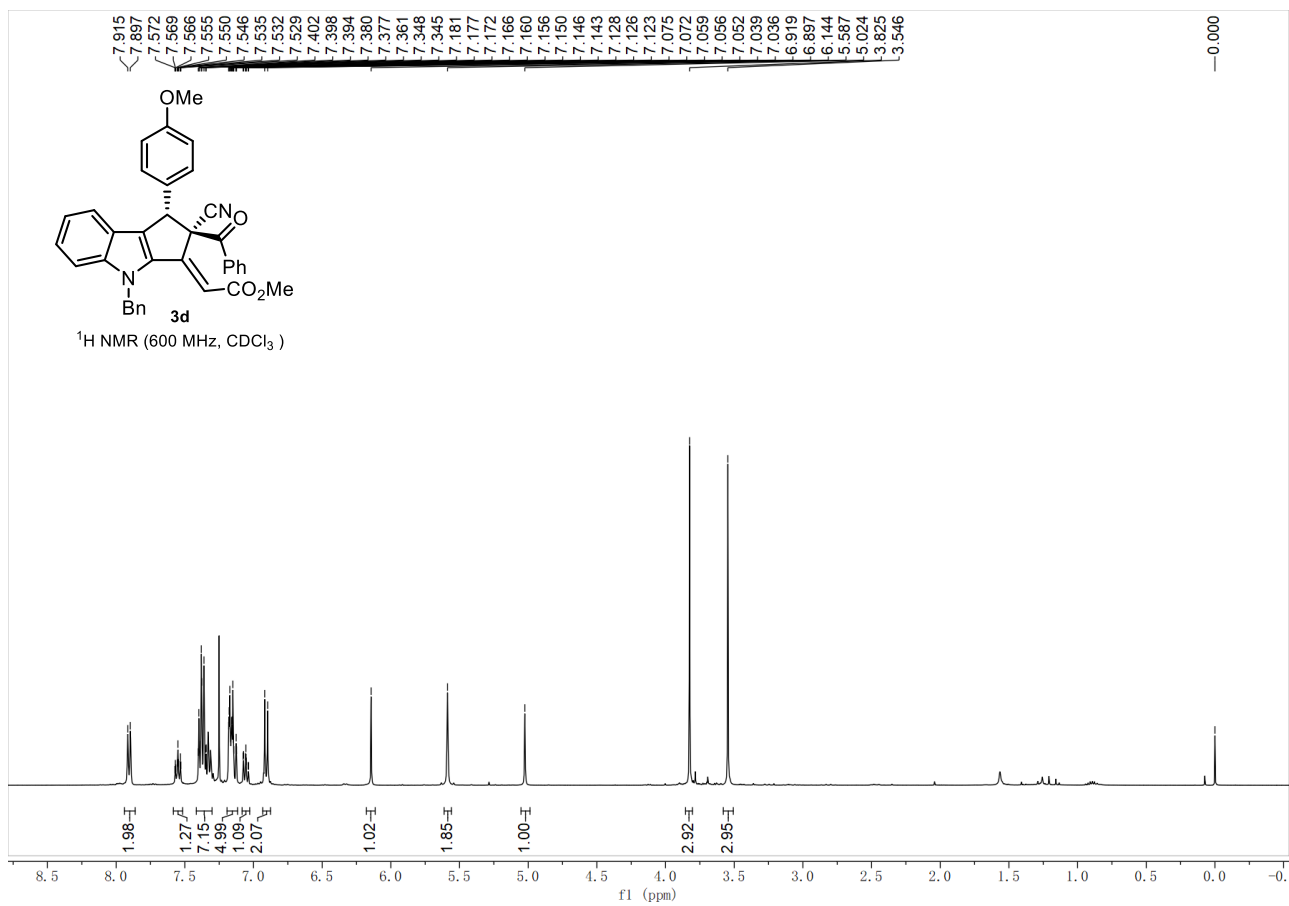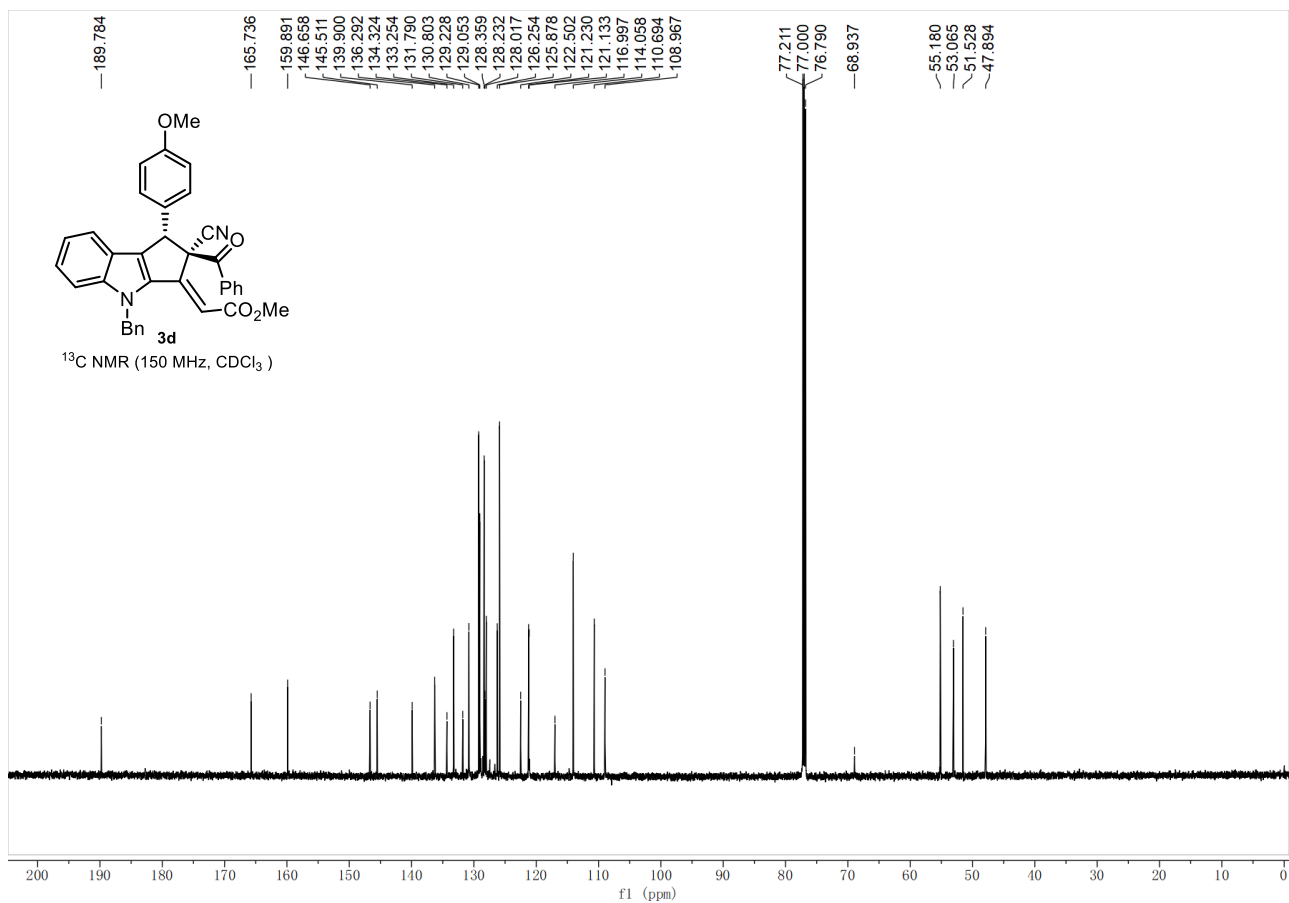

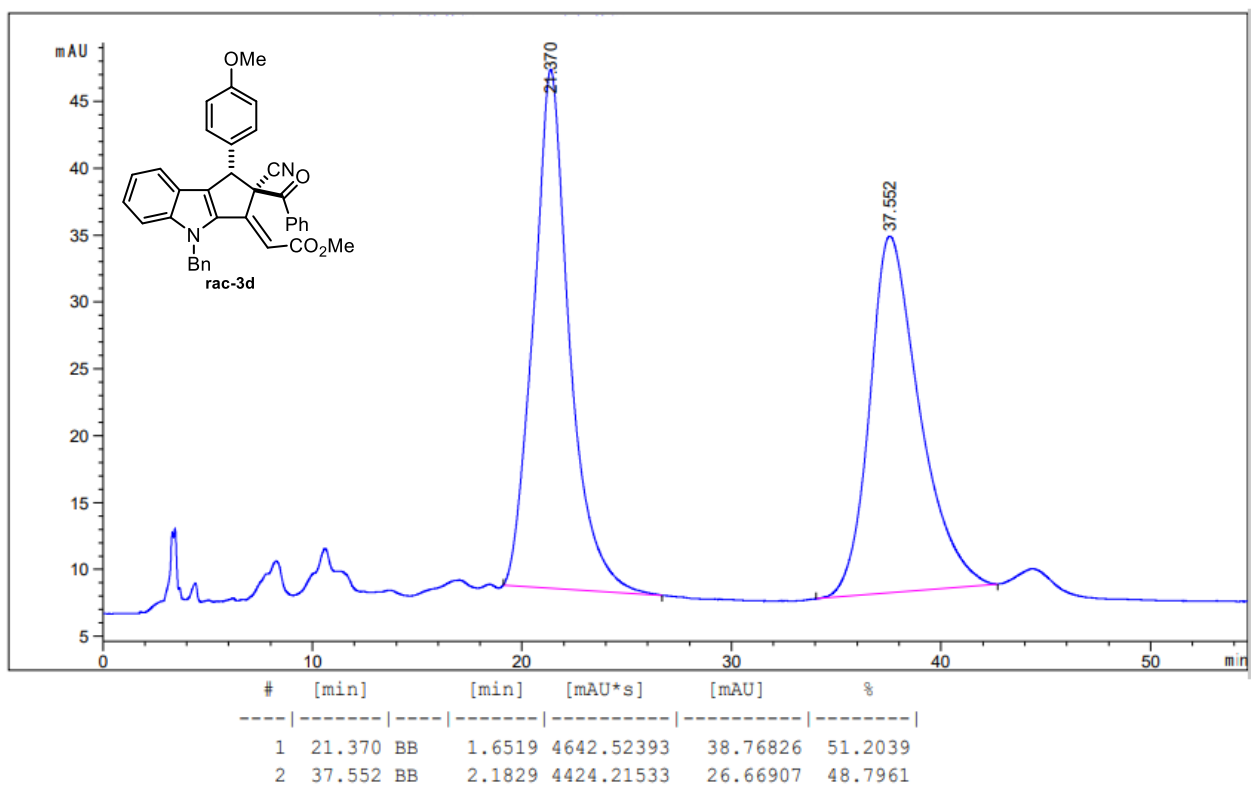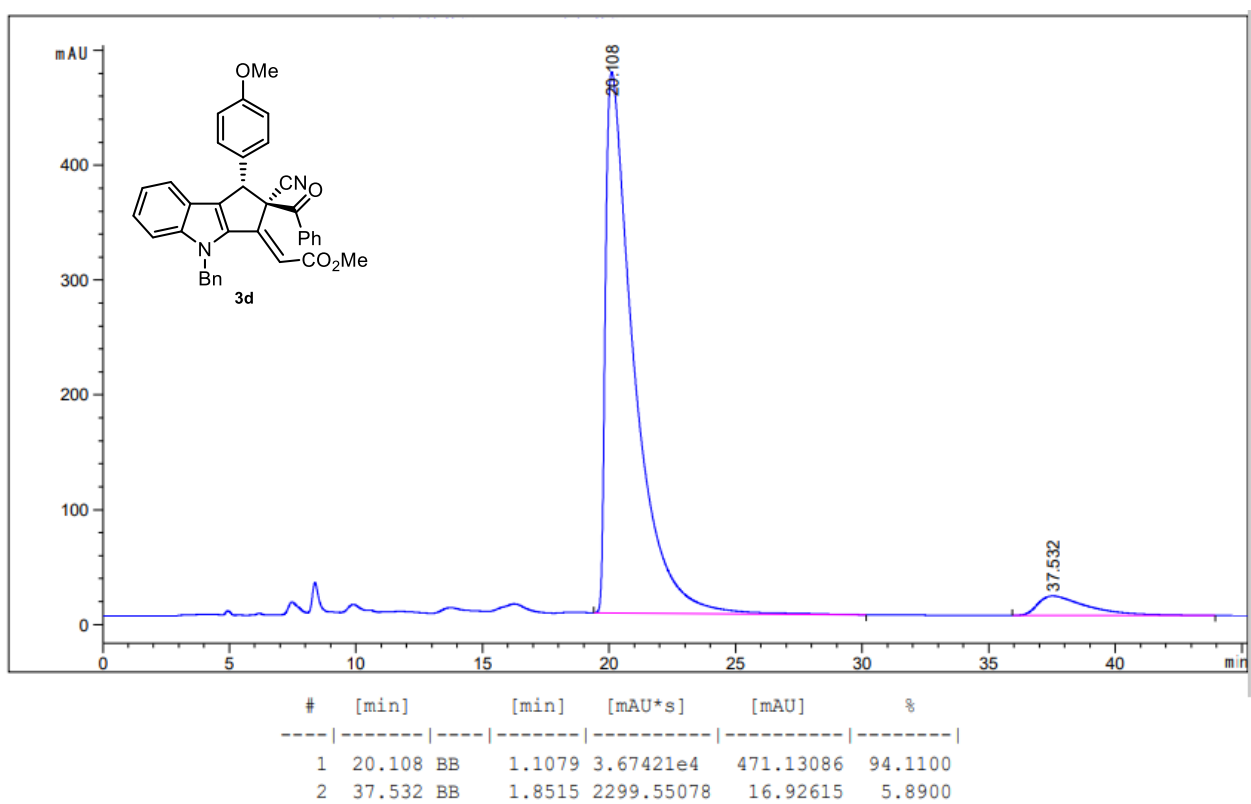

|                |                 |              |                |            |              |                   |                                  |
|----------------|-----------------|--------------|----------------|------------|--------------|-------------------|----------------------------------|
| Name           | CYC-220406-36   | Rack Pos.    |                | Instrument | Instrument 1 | Operator          |                                  |
| Inj. Vol. (ul) | 8               | Plate Pos.   |                | IRM Status | Success      |                   |                                  |
| Data File      | CYC-220406-36.d | Method (Acq) | ZYJ-20201106.m | Comment    |              | Acq. Time (Local) | 4/9/2022 10:20:19 AM (UTC+08:00) |

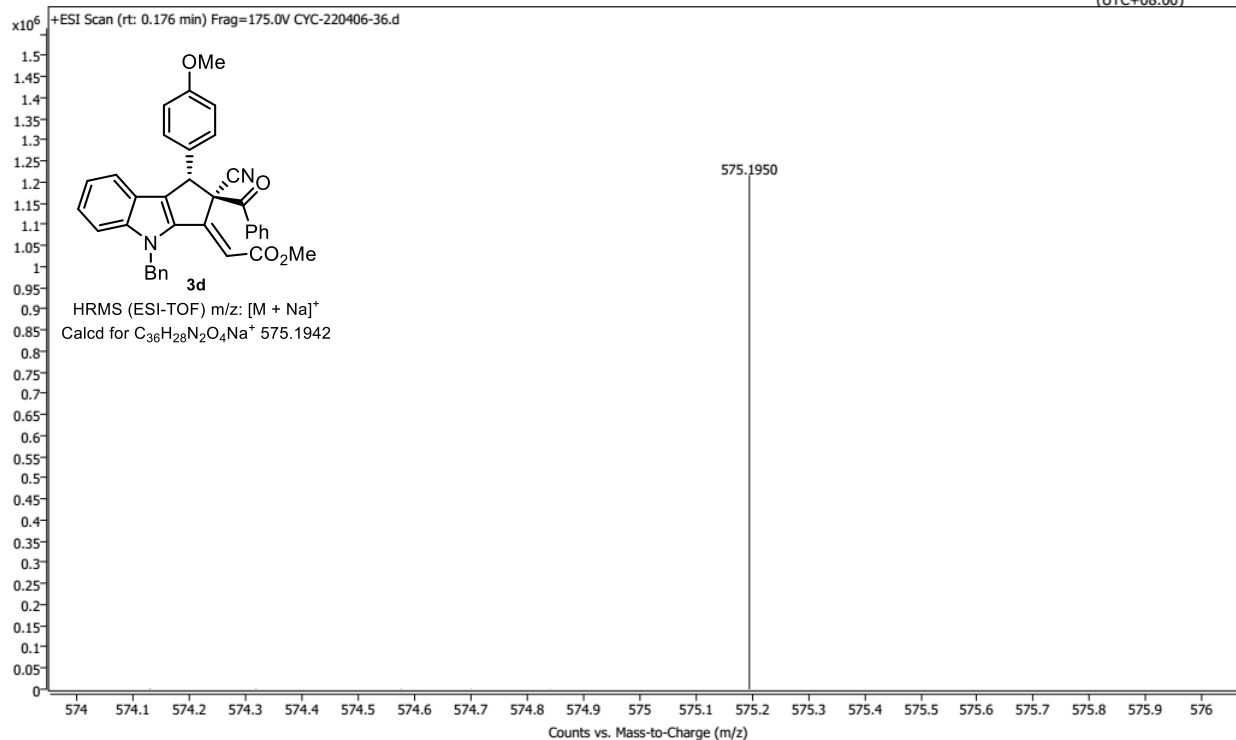



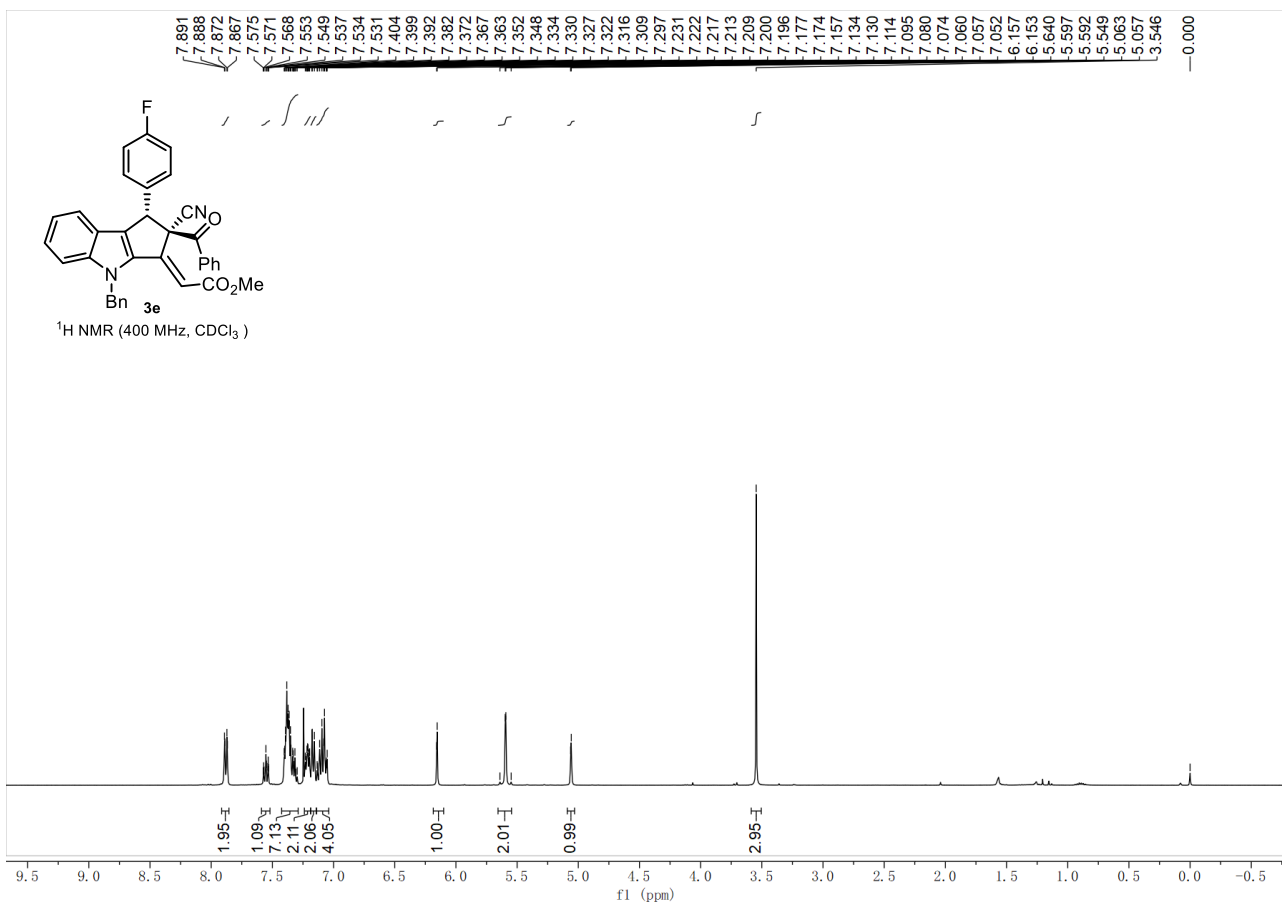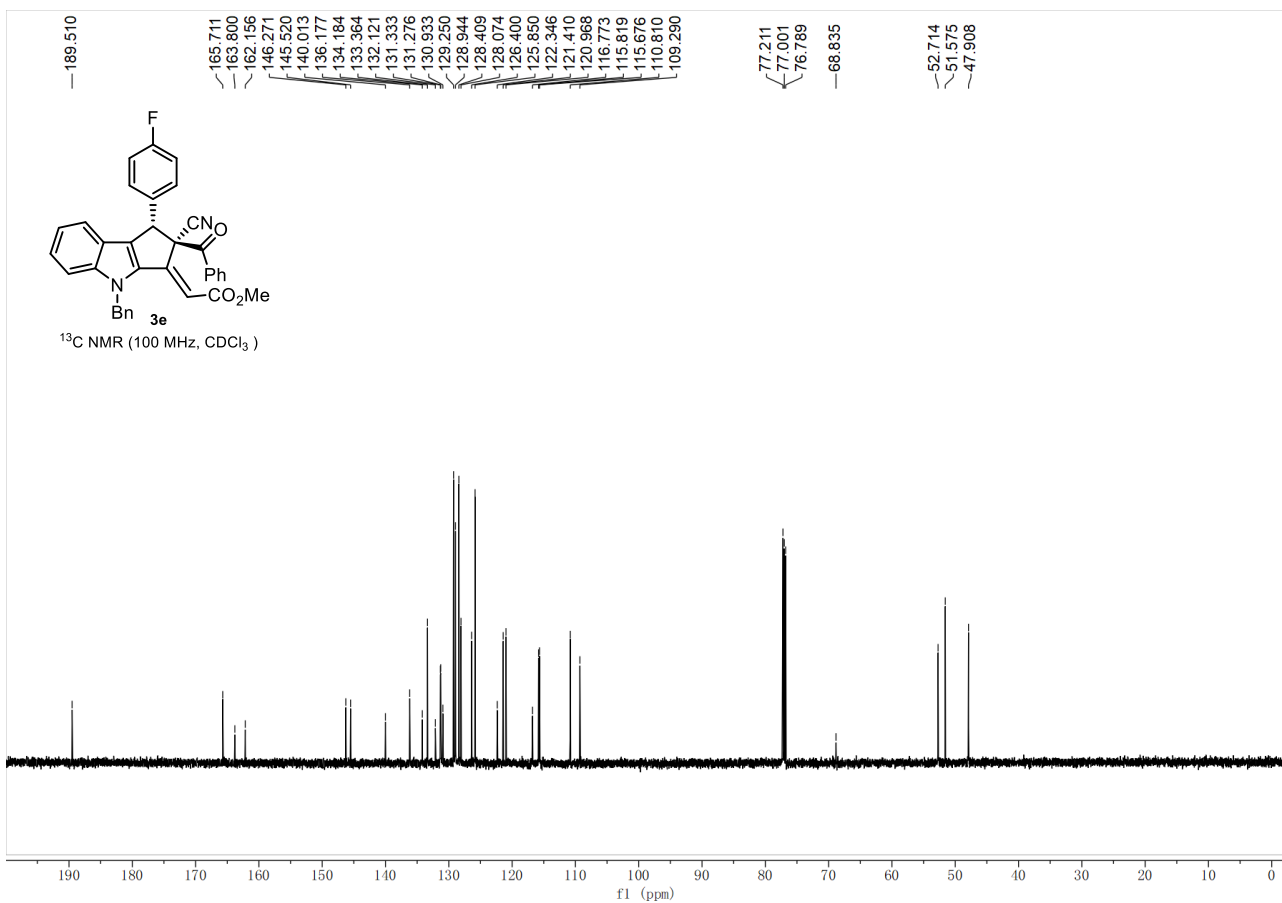

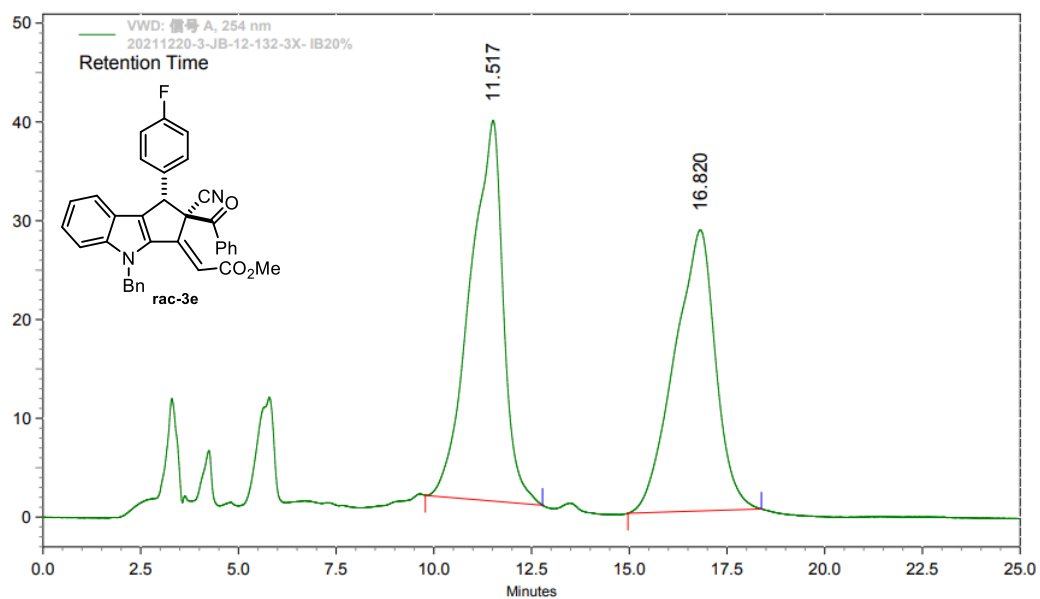

### AREA PERCENT REPORT

| Peak No. | Ret Time | Width | Height | Area     | Area [%] |
|----------|----------|-------|--------|----------|----------|
| 1        | 11.517   | 2.997 | 646287 | 38198004 | 52.2167  |
| 2        | 16.820   | 3.413 | 477300 | 34954859 | 47.7833  |

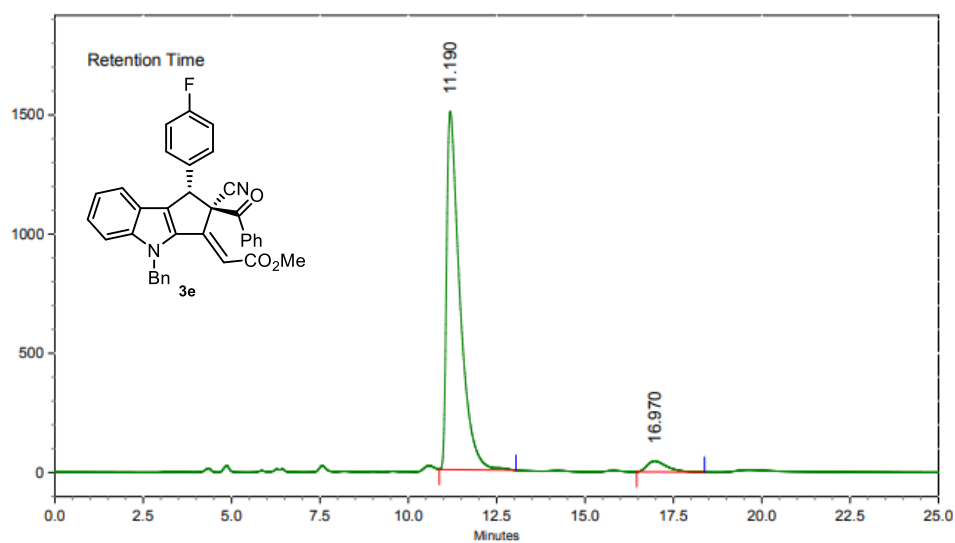

### AREA PERCENT REPORT

| Peak No. | Ret Time | Width | Height   | Area      | Area [%] |
|----------|----------|-------|----------|-----------|----------|
| 1        | 11.190   | 2.170 | 25194964 | 657783056 | 95.6538  |
| 2        | 16.970   | 1.920 | 764296   | 29887205  | 4.3462   |

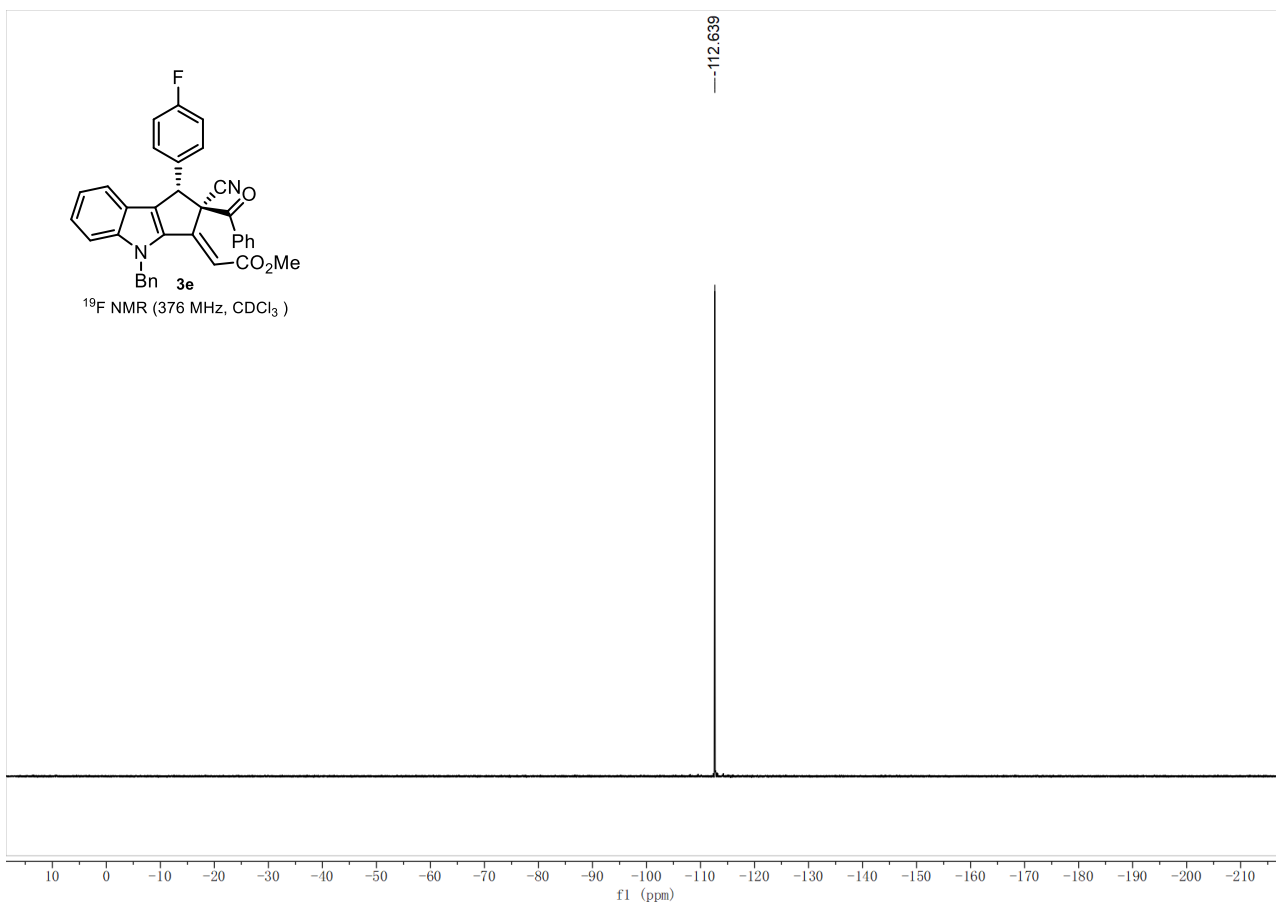

| Name           | CYC-220406-27   | Rack Pos.    | Instrument     | Instrument 1 | Operator                                          |
|----------------|-----------------|--------------|----------------|--------------|---------------------------------------------------|
| Inj. Vol. (ul) | 8               | Plate Pos.   | IRM Status     | Success      |                                                   |
| Data File      | CYC-220406-27.d | Method (Acq) | ZYJ-20201106.m | Comment      | Acq. Time (Local) 4/9/2022 9:53:36 AM (UTC+08:00) |

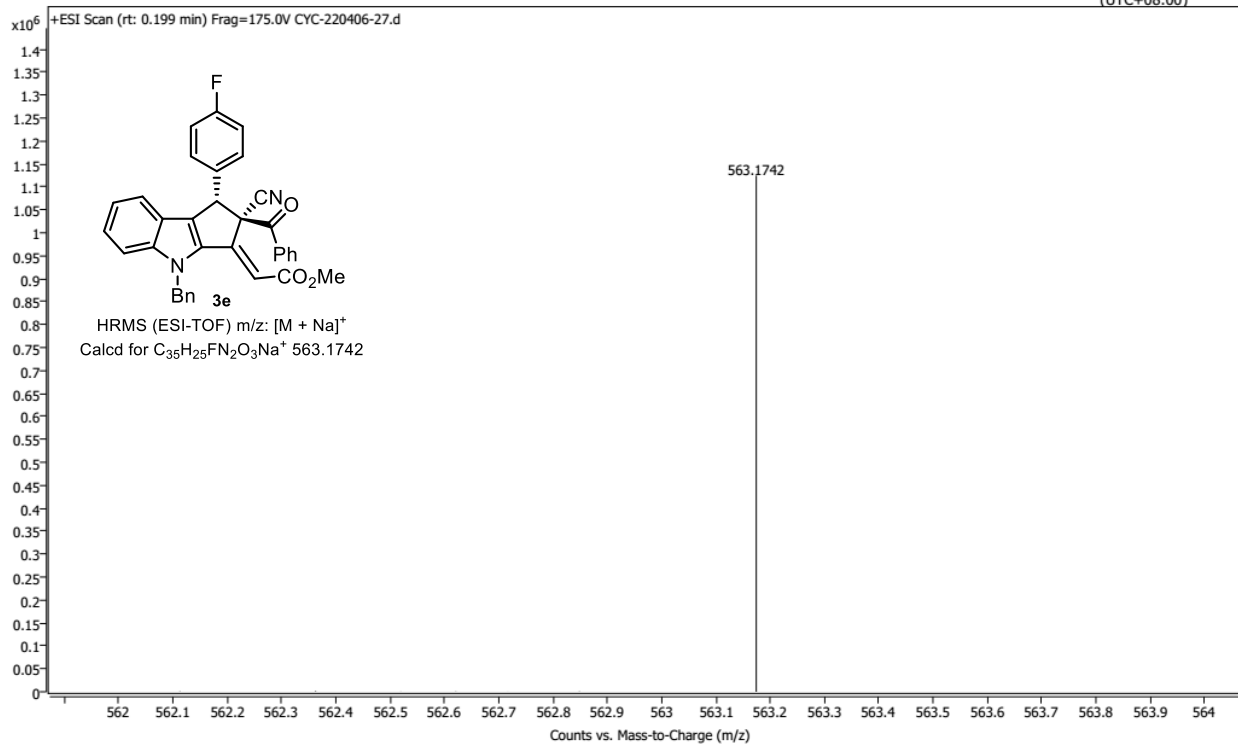

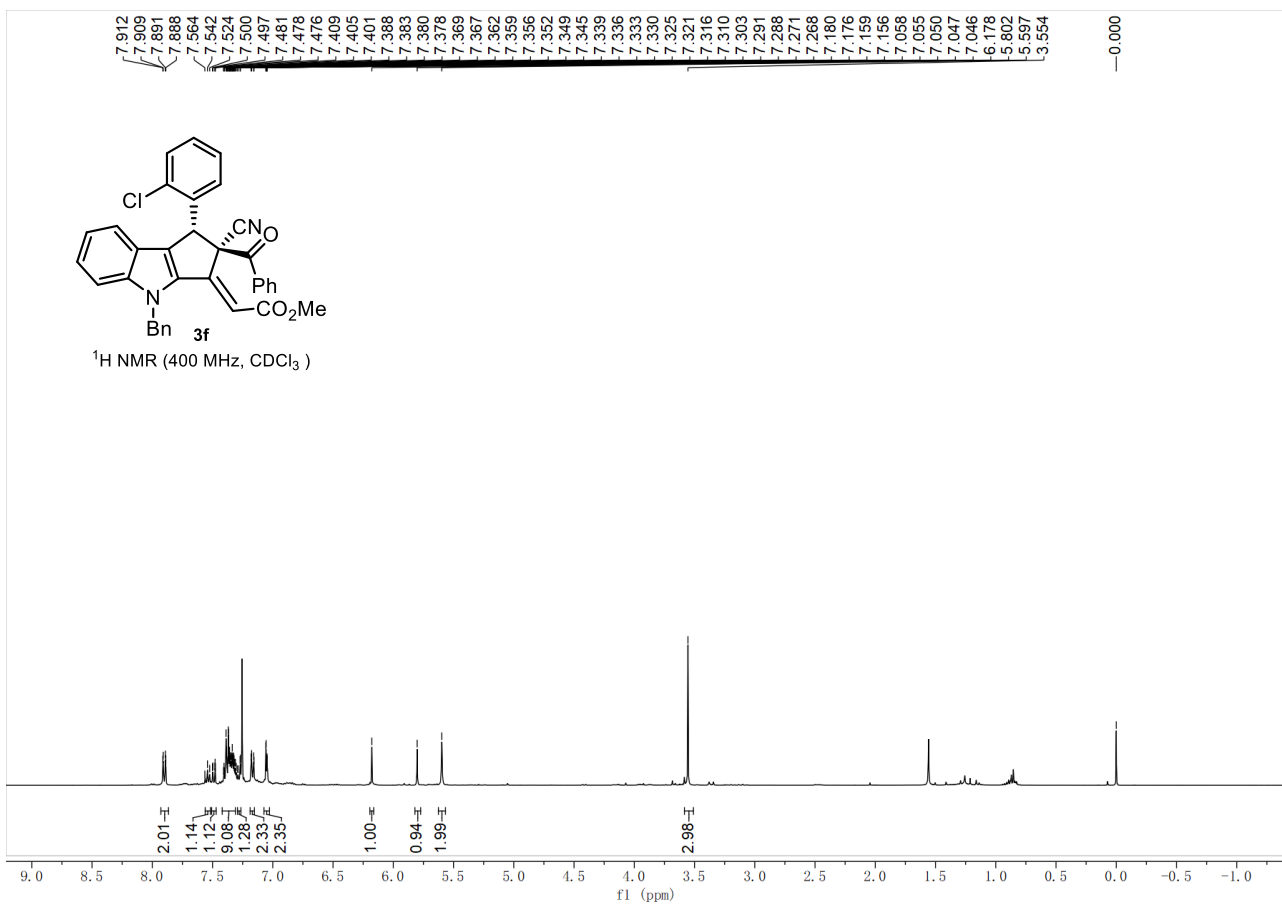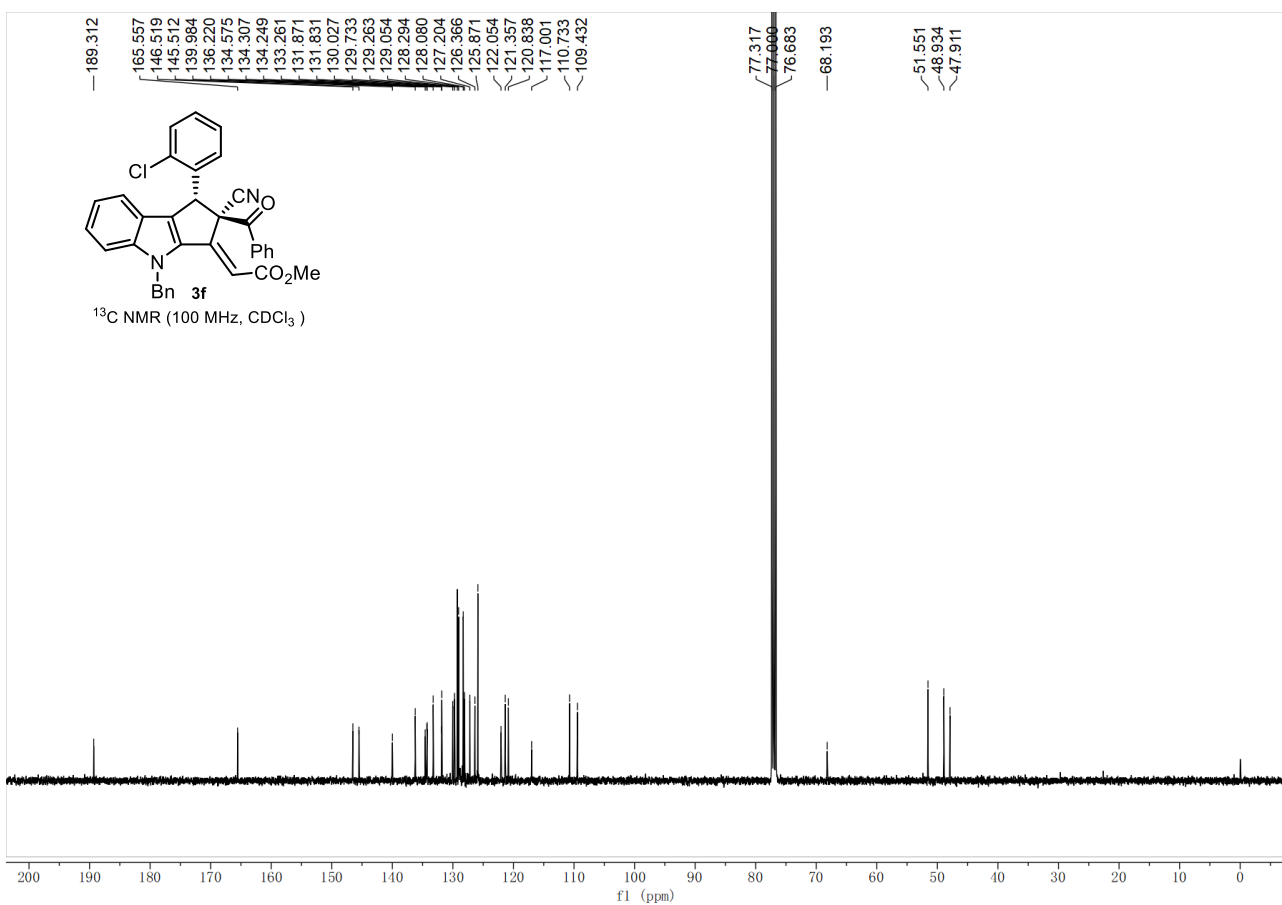

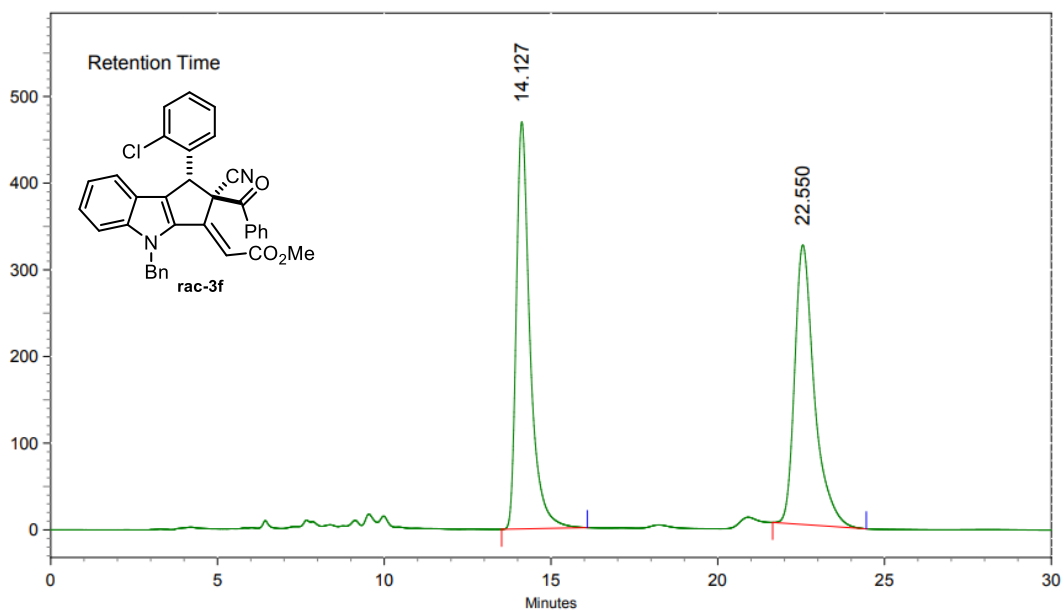

### AREA PERCENT REPORT

| Peak No. | Ret Time | Width | Height  | Area      | Area [%] |
|----------|----------|-------|---------|-----------|----------|
| 1        | 14.127   | 2.573 | 7877961 | 224533728 | 50.2902  |
| 2        | 22.550   | 2.807 | 5407970 | 221942612 | 49.7098  |

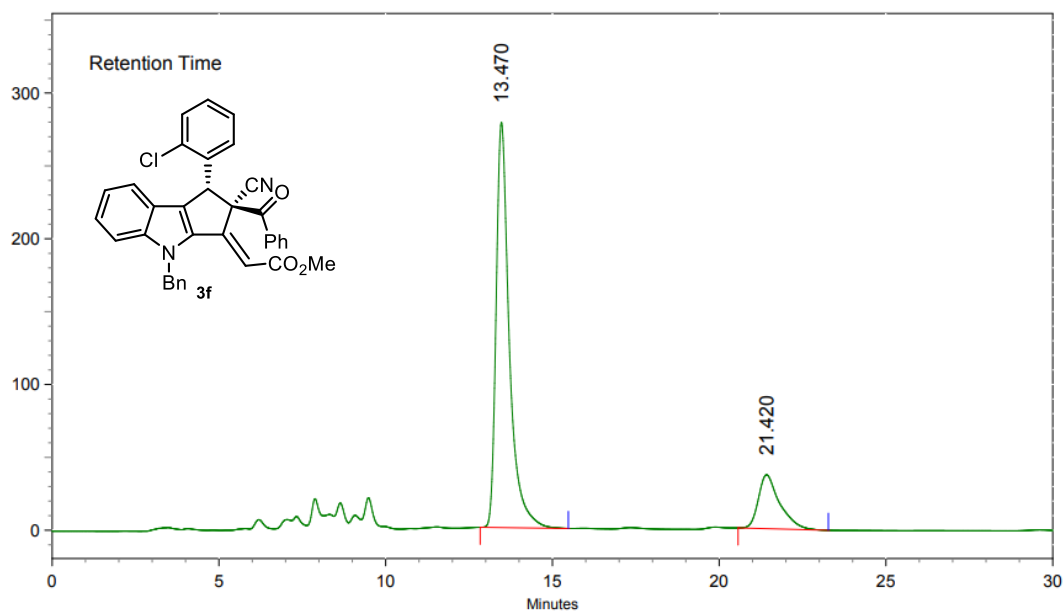

### AREA PERCENT REPORT

| Peak No. | Ret Time | Width | Height  | Area      | Area [%] |
|----------|----------|-------|---------|-----------|----------|
| 1        | 13.470   | 2.643 | 4663761 | 127889900 | 82.3282  |
| 2        | 21.420   | 2.707 | 620541  | 27451695  | 17.6718  |

|                |                 |              |                |            |                  |                                  |
|----------------|-----------------|--------------|----------------|------------|------------------|----------------------------------|
| Name           | CYC-220406-37   | Rack Pos.    |                | Instrument | Instrument 1     | Operator                         |
| Inj. Vol. (ul) | 8               | Plate Pos.   |                | IRM Status | Some ions missed |                                  |
| Data File      | CYC-220406-37.d | Method (Acq) | ZYJ-20201106.m | Comment    |                  | Acq. Time (Local)                |
|                |                 |              |                |            |                  | 4/9/2022 10:52:20 AM (UTC+08:00) |

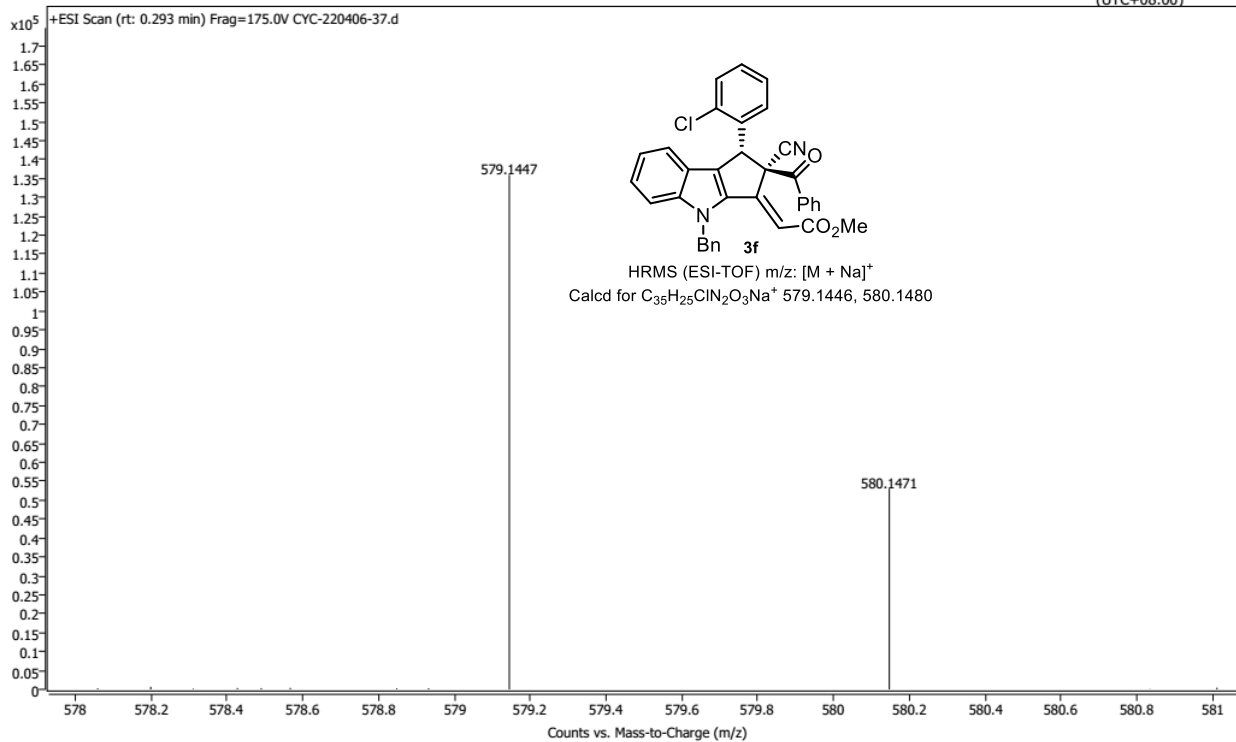

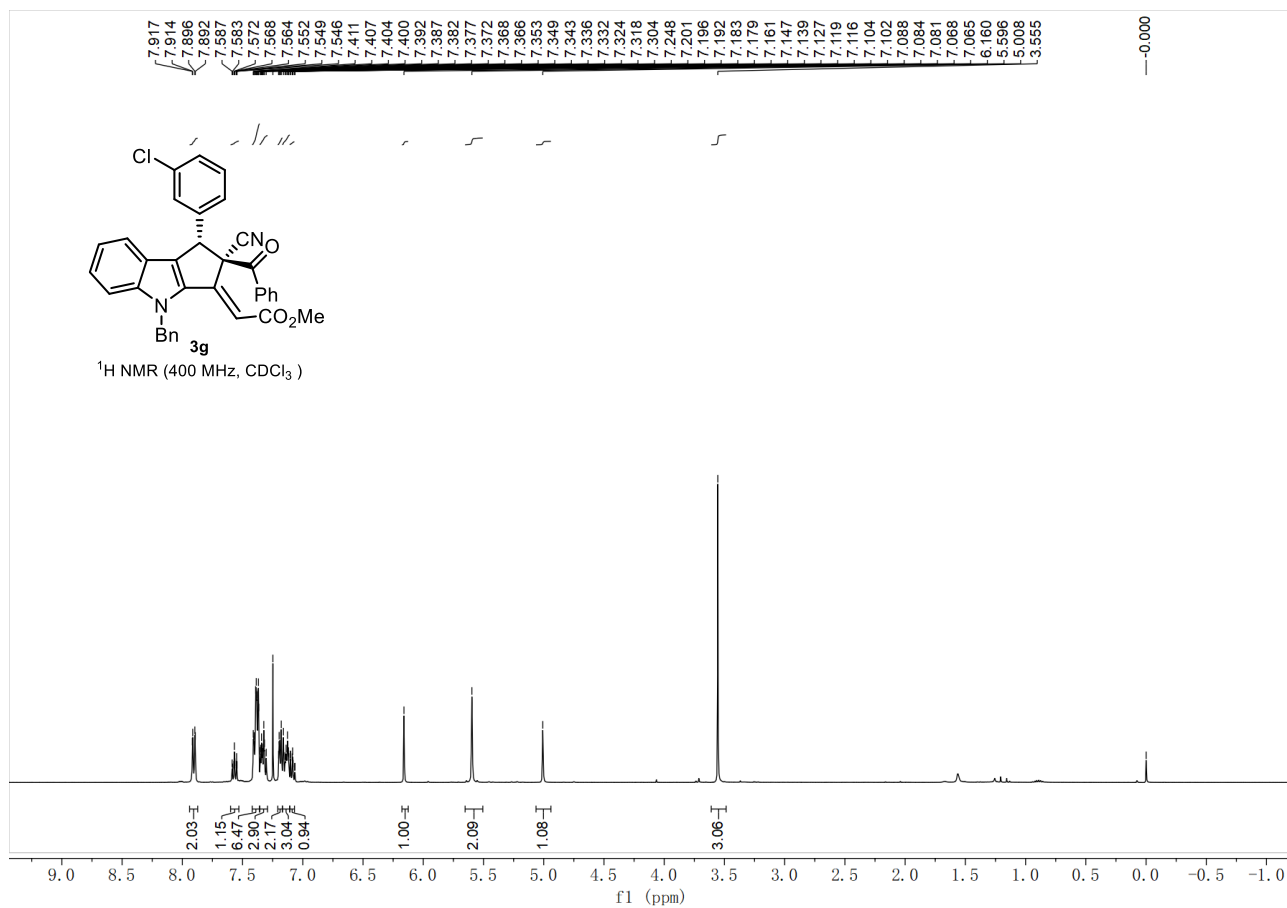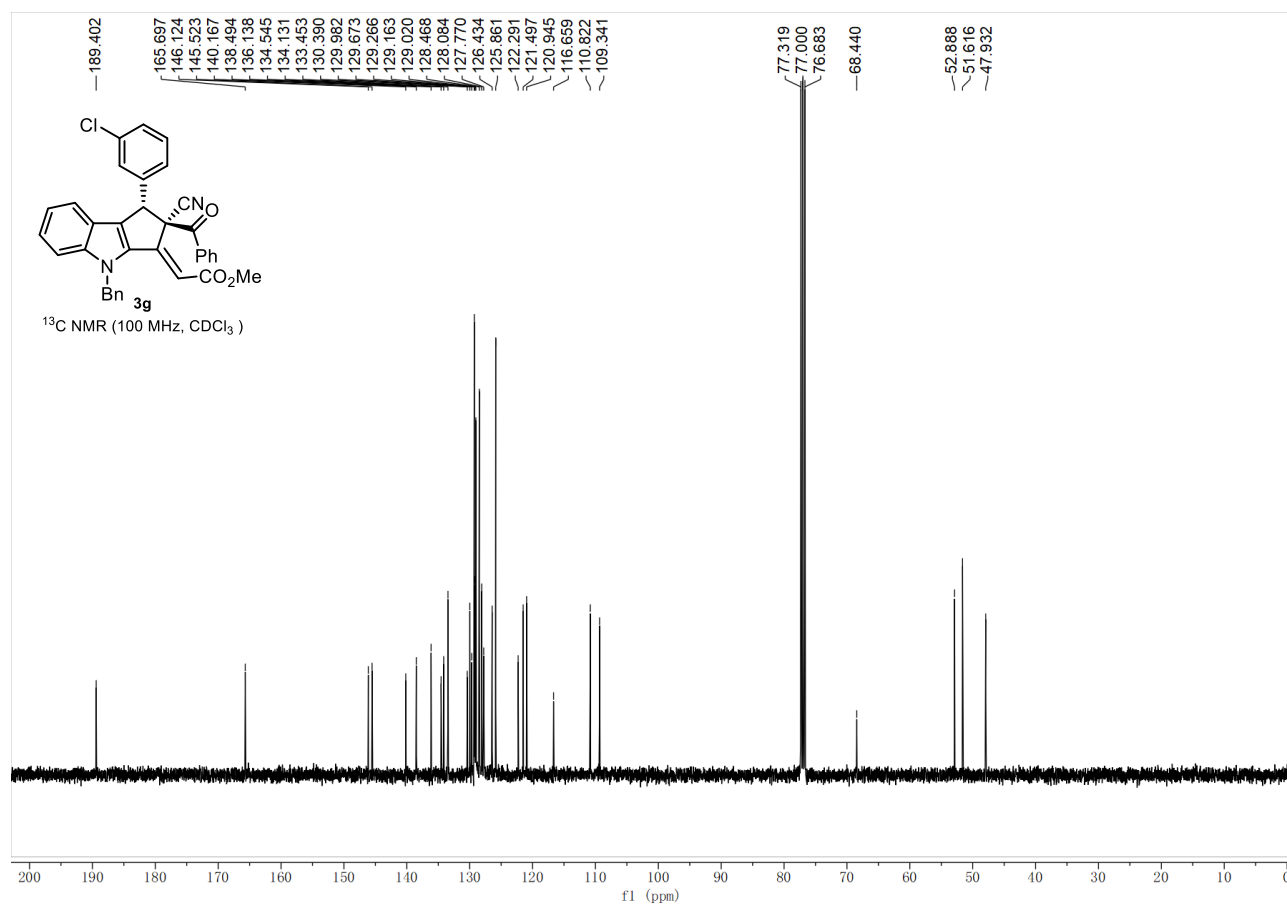

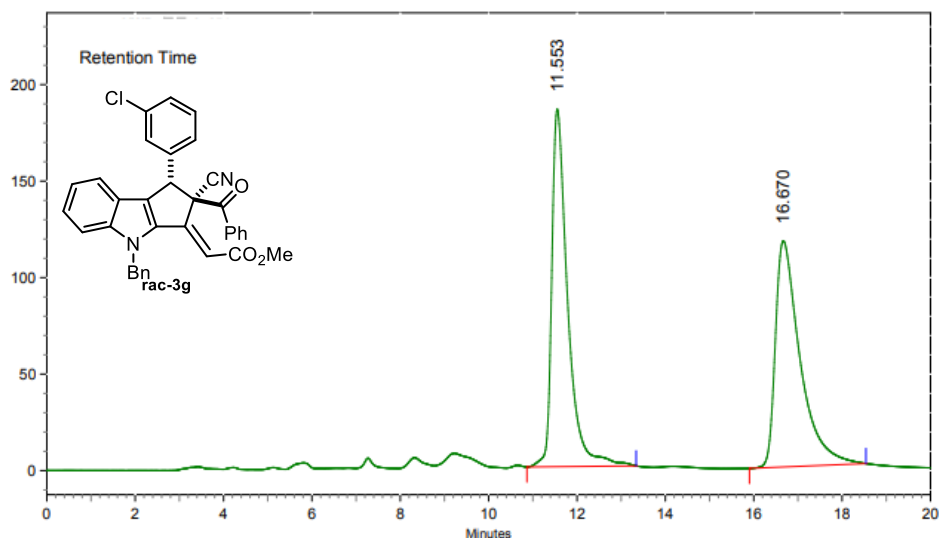

### AREA PERCENT REPORT

| Peak No. | Ret Time | Width | Height  | Area     | Area [%] |
|----------|----------|-------|---------|----------|----------|
| 1        | 11.553   | 2.473 | 3107348 | 77648017 | 50.4894  |
| 2        | 16.670   | 2.637 | 1965246 | 76142563 | 49.5106  |

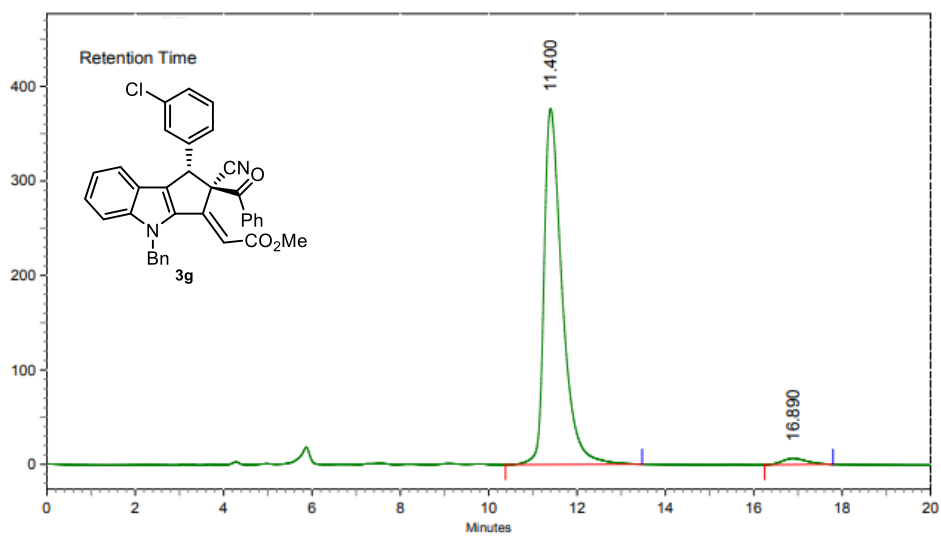

### AREA PERCENT REPORT

| Peak No. | Ret Time | Width | Height  | Area      | Area [%] |
|----------|----------|-------|---------|-----------|----------|
| 1        | 11.400   | 3.093 | 6316741 | 179639463 | 97.6855  |
| 2        | 16.890   | 1.547 | 109246  | 4256232   | 2.3145   |



Name: CYC-220406-28 Rack Pos.: Plate Pos.: Method (Acq): ZYJ-20201106.m Instrument: IRM Status: Comment: Instrument 1: Success Operator: Acq. Time (Local): 4/9/2022 9:56:34 AM (UTC+08:00)

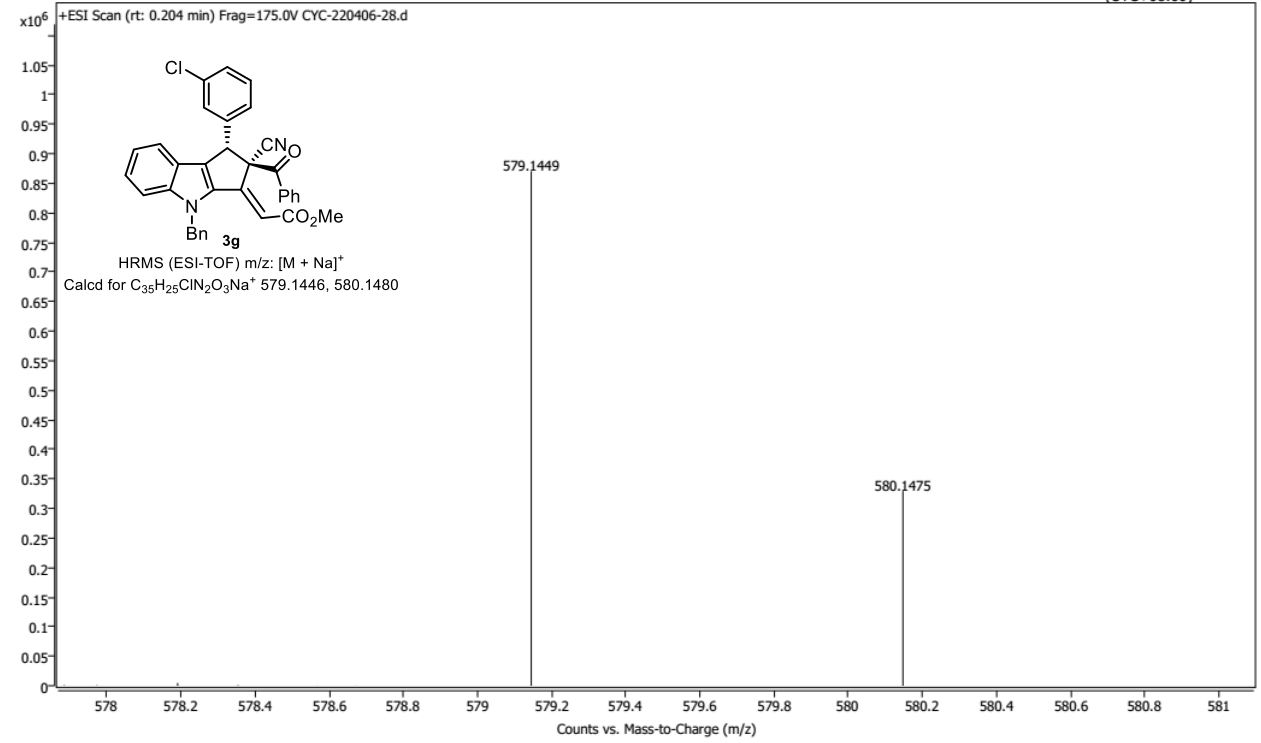

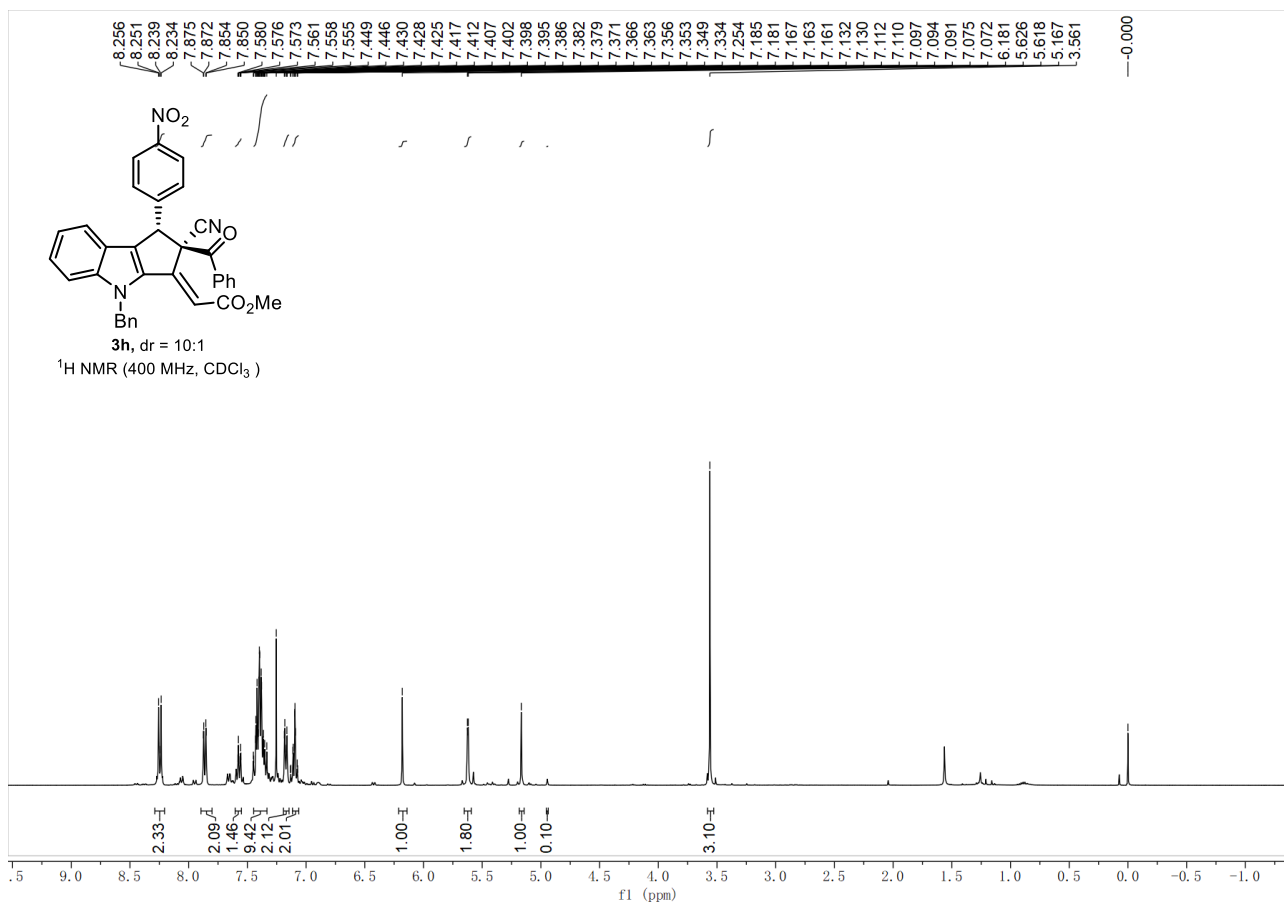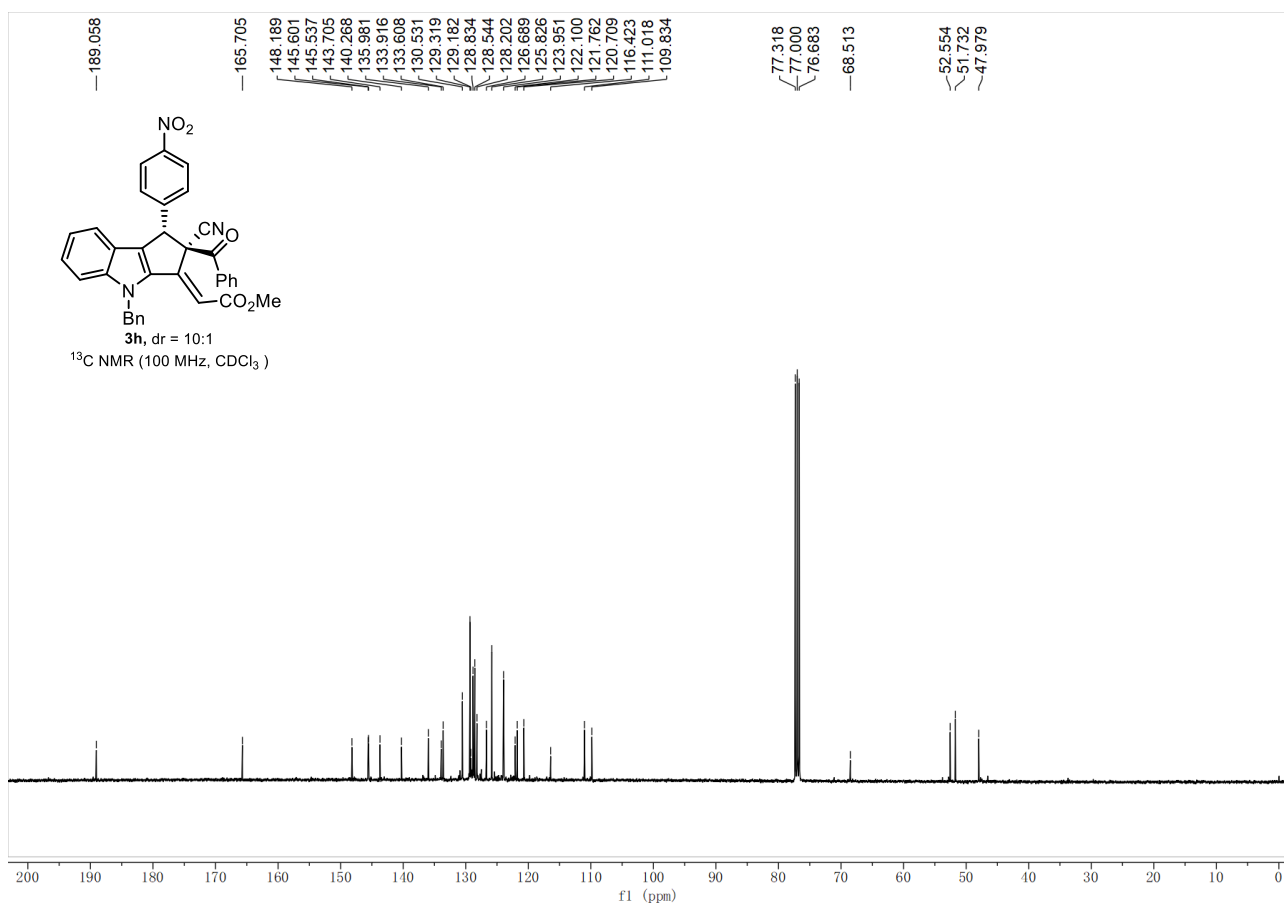

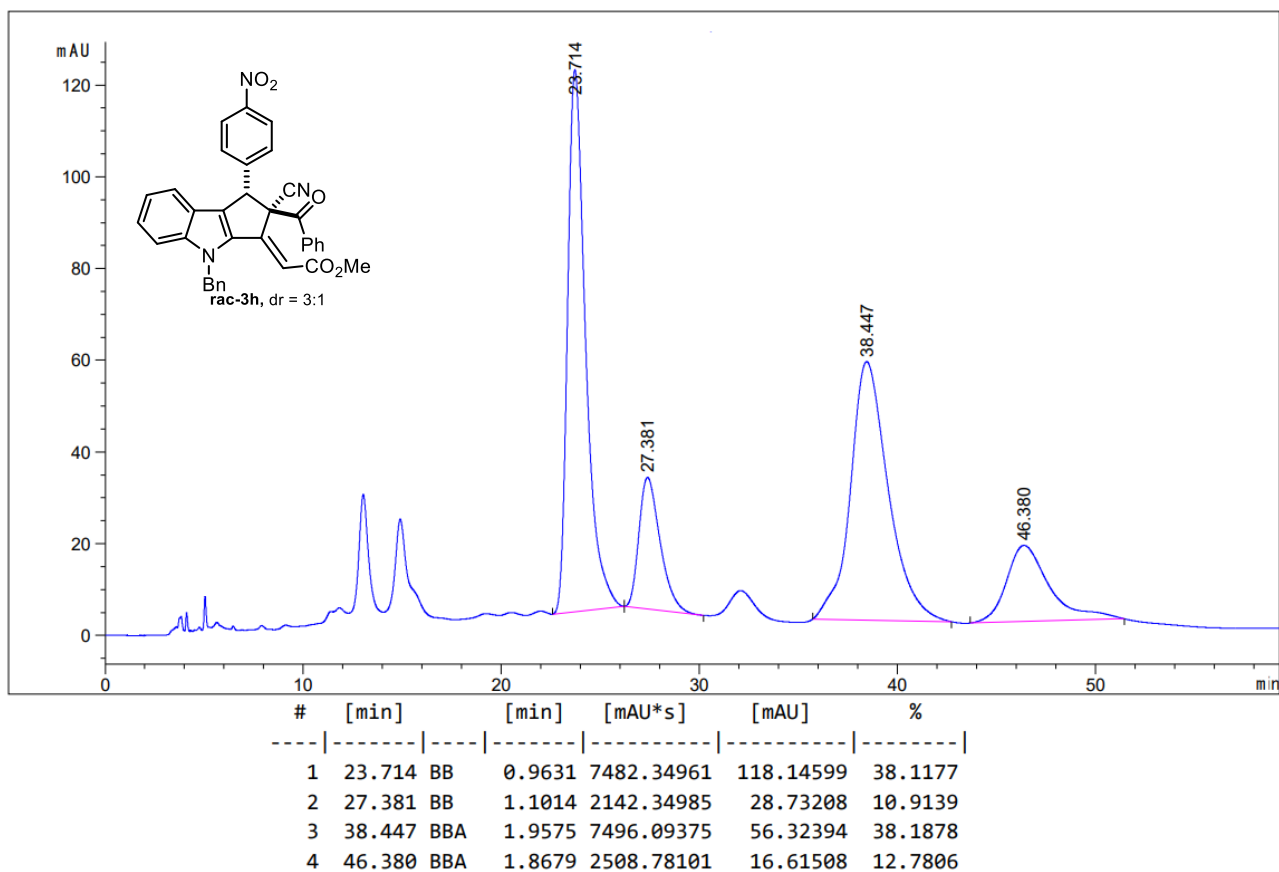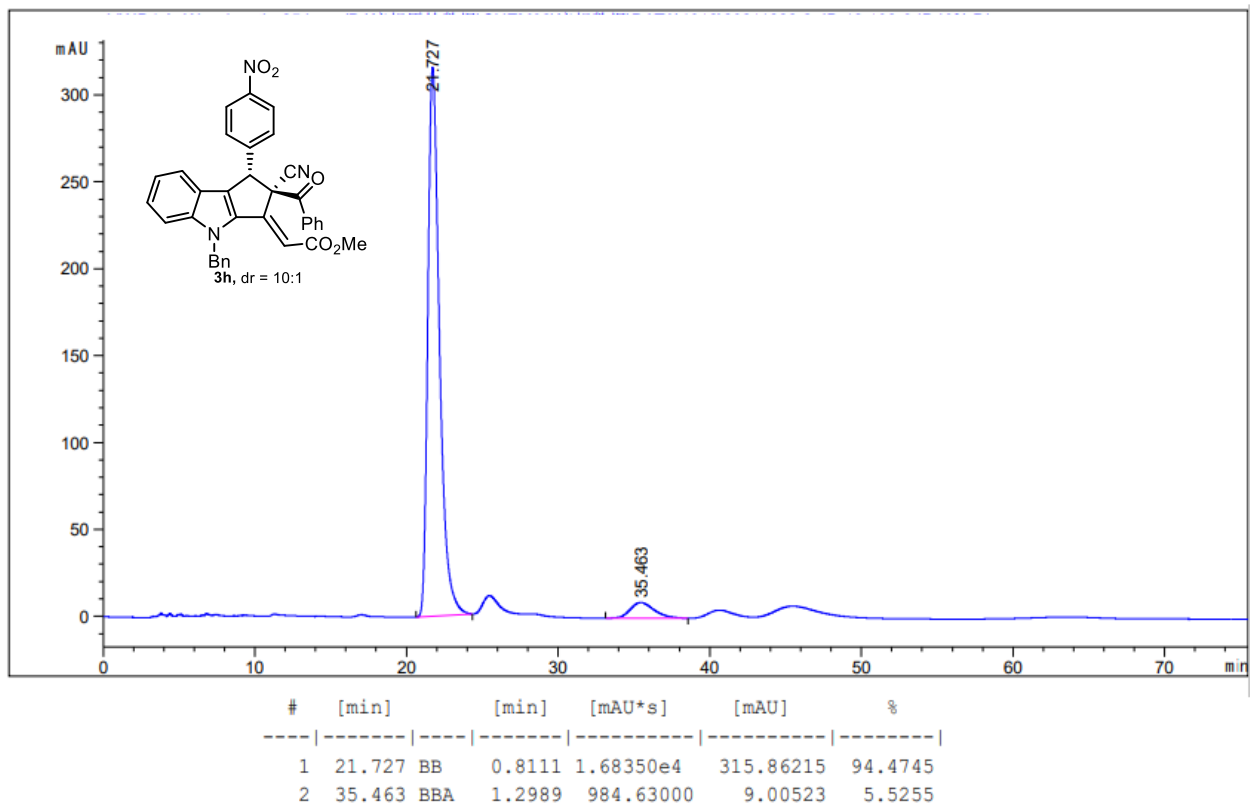

|                |                 |              |                |            |              |                                                      |
|----------------|-----------------|--------------|----------------|------------|--------------|------------------------------------------------------|
| Name           | CYC-220406-29   | Rack Pos.    |                | Instrument | Instrument 1 | Operator                                             |
| Inj. Vol. (ul) | 8               | Plate Pos.   |                | IRM Status | Success      |                                                      |
| Data File      | CYC-220406-29.d | Method (Acq) | ZYJ-20201106.m | Comment    |              | Acq. Time (Local) 4/9/2022 9:59:32 AM<br>(UTC+08:00) |

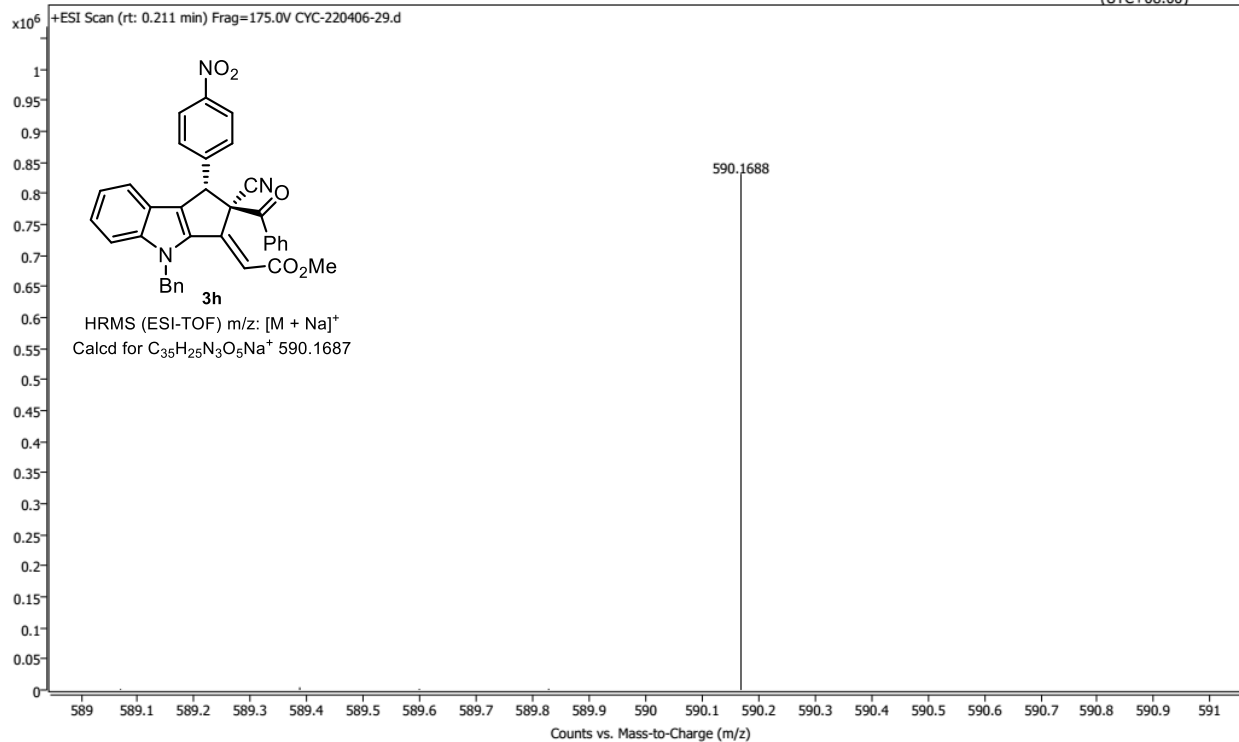

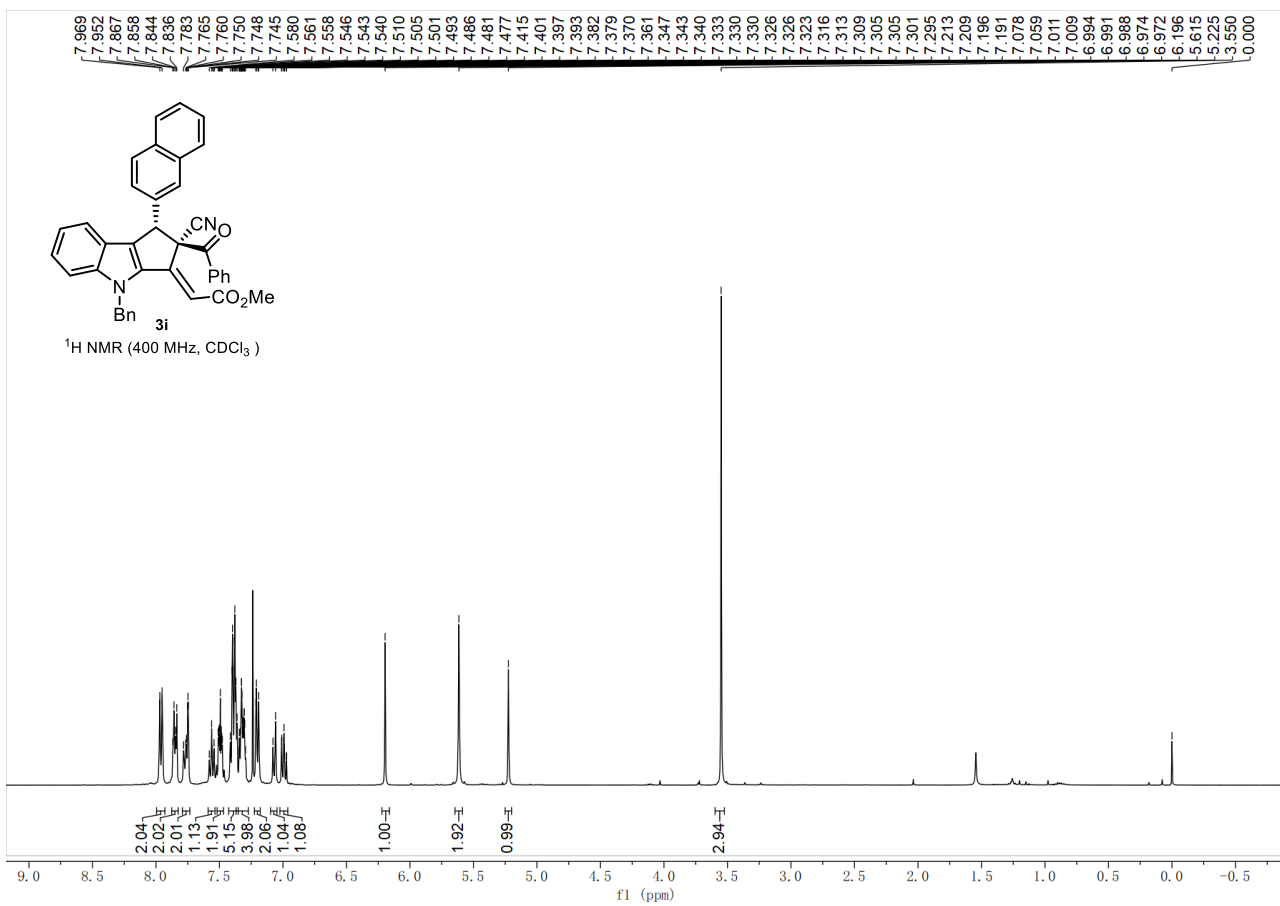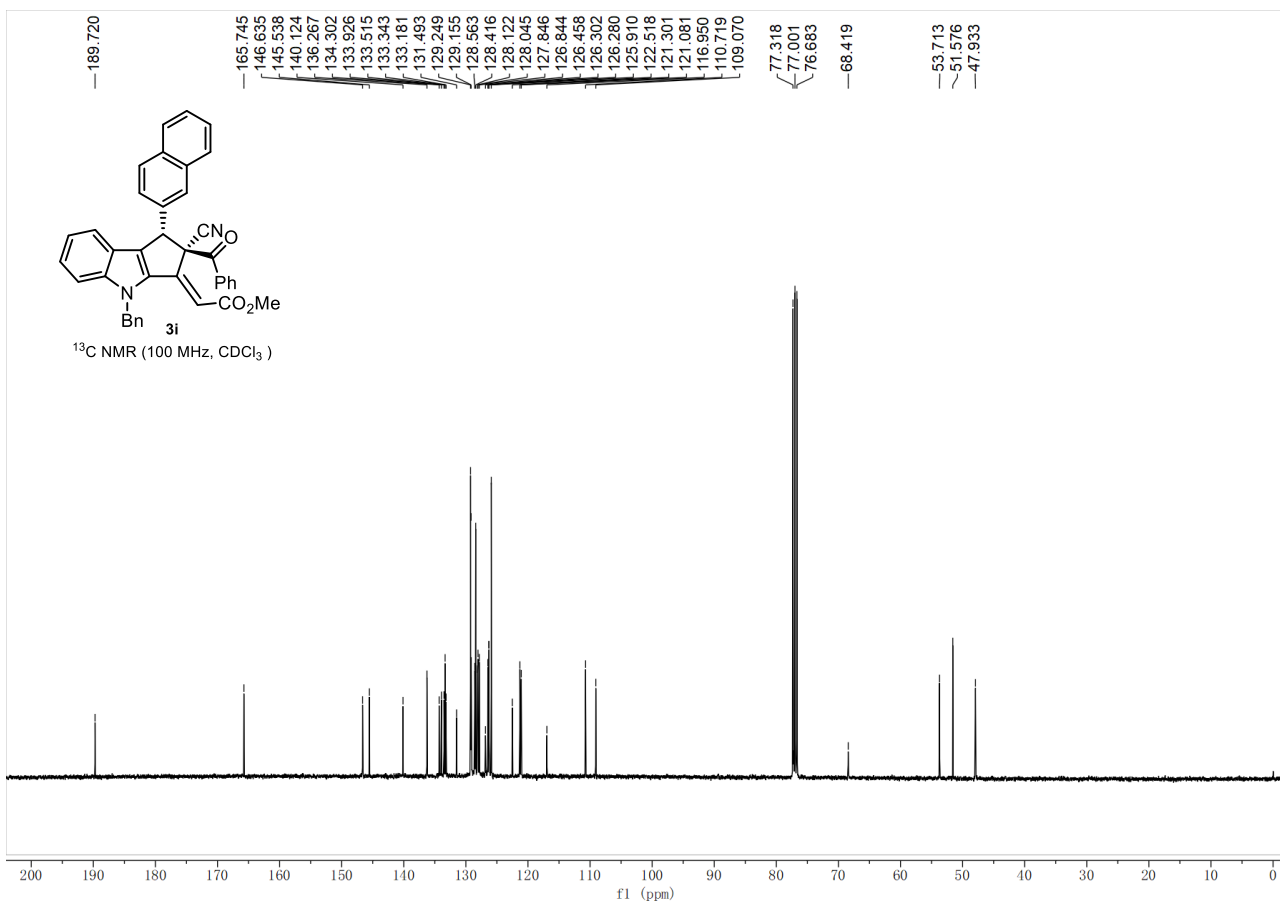

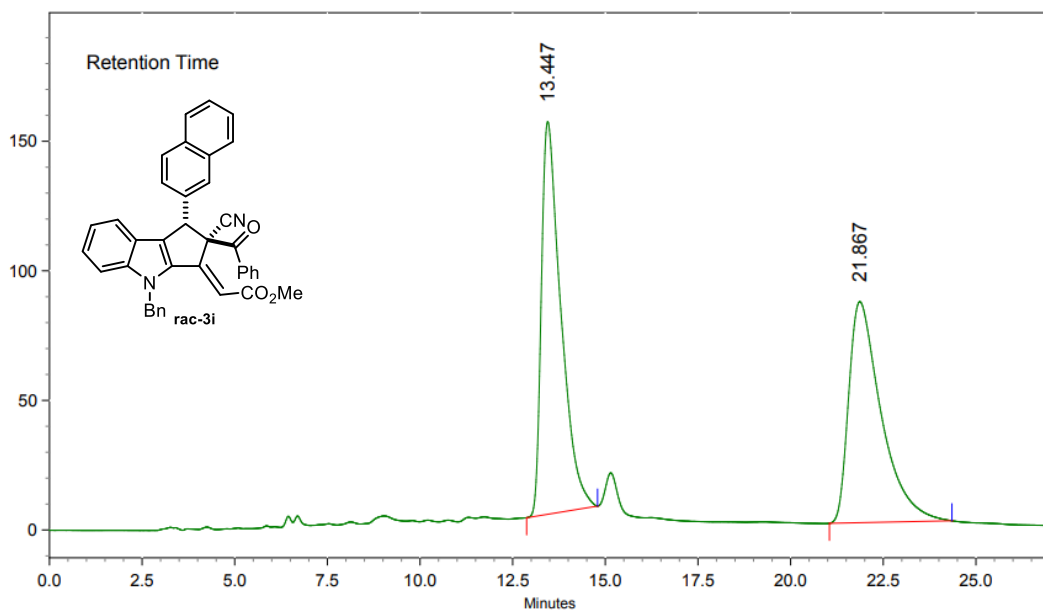

### AREA PERCENT REPORT

| Peak No. | Ret Time | Width | Height  | Area     | Area [%] |
|----------|----------|-------|---------|----------|----------|
| 1        | 13.447   | 1.913 | 2541914 | 93115451 | 51.6469  |
| 2        | 21.867   | 3.307 | 1431065 | 87176867 | 48.3531  |

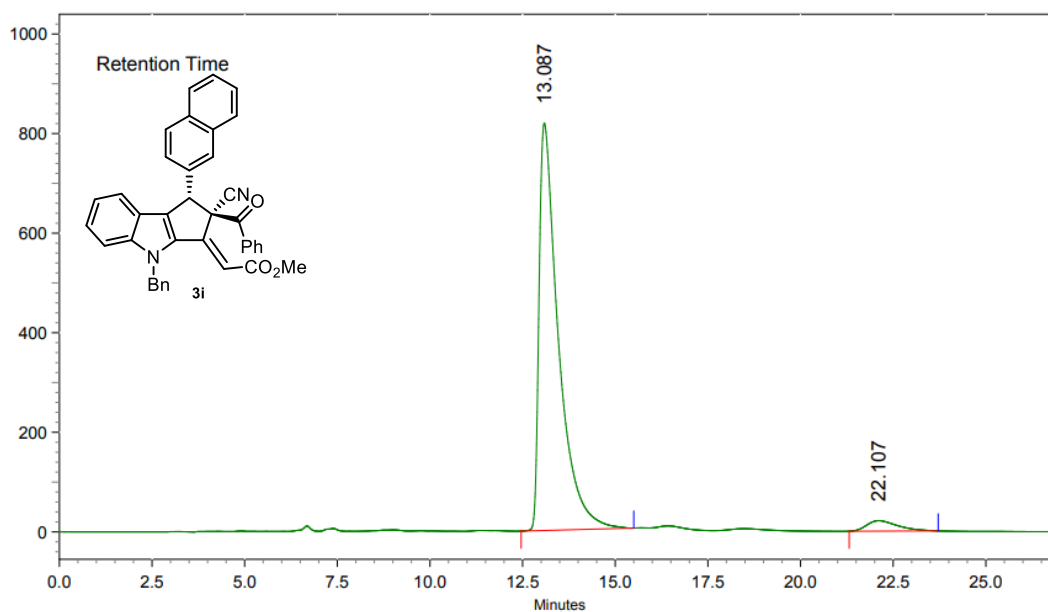

### AREA PERCENT REPORT

| Peak No. | Ret Time | Width | Height   | Area      | Area [%] |
|----------|----------|-------|----------|-----------|----------|
| 1        | 13.087   | 3.040 | 13724743 | 496471446 | 96.0521  |
| 2        | 22.107   | 2.400 | 352219   | 20405799  | 3.9479   |

|                |                 |              |                |            |                  |                                                    |
|----------------|-----------------|--------------|----------------|------------|------------------|----------------------------------------------------|
| Name           | CYC-220406-30   | Rack Pos.    |                | Instrument | Instrument 1     | Operator                                           |
| Inj. Vol. (ul) | 8               | Plate Pos.   |                | IRM Status | Some ions missed |                                                    |
| Data File      | CYC-220406-30.d | Method (Acq) | ZYJ-20201106.m | Comment    |                  | Acq. Time (Local) 4/9/2022 10:02:32 AM (UTC+08:00) |

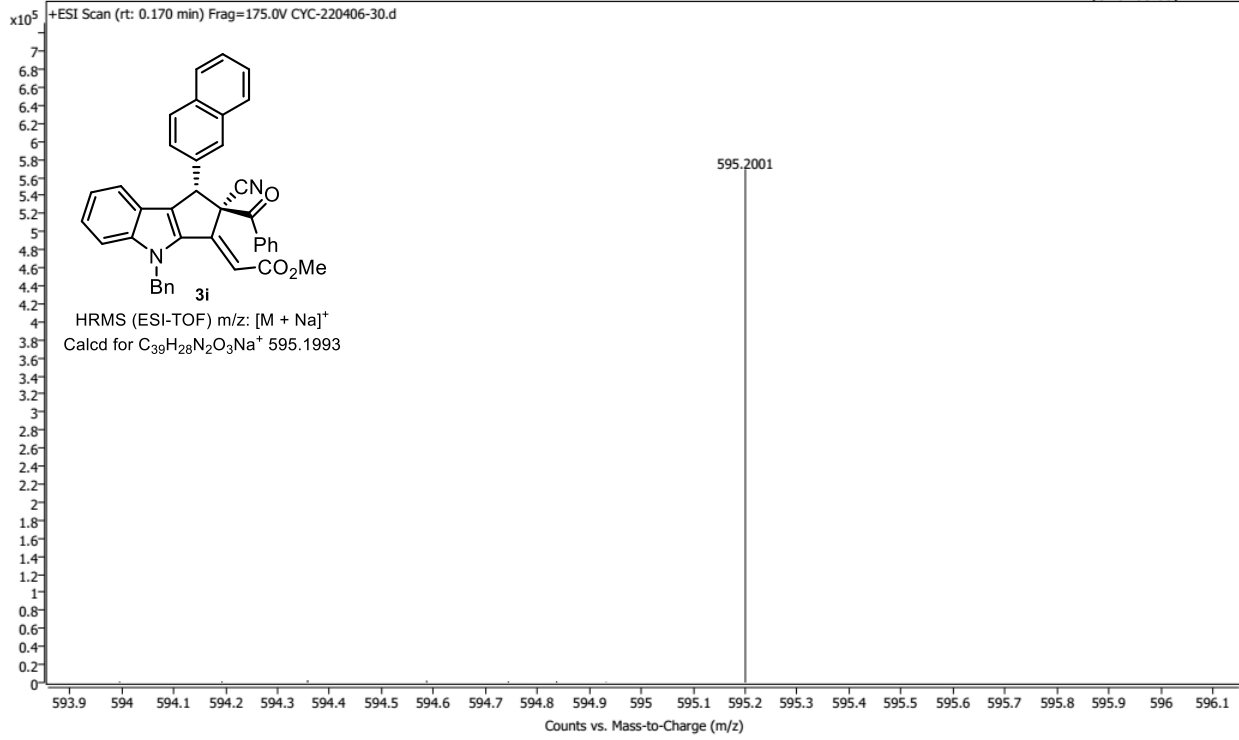

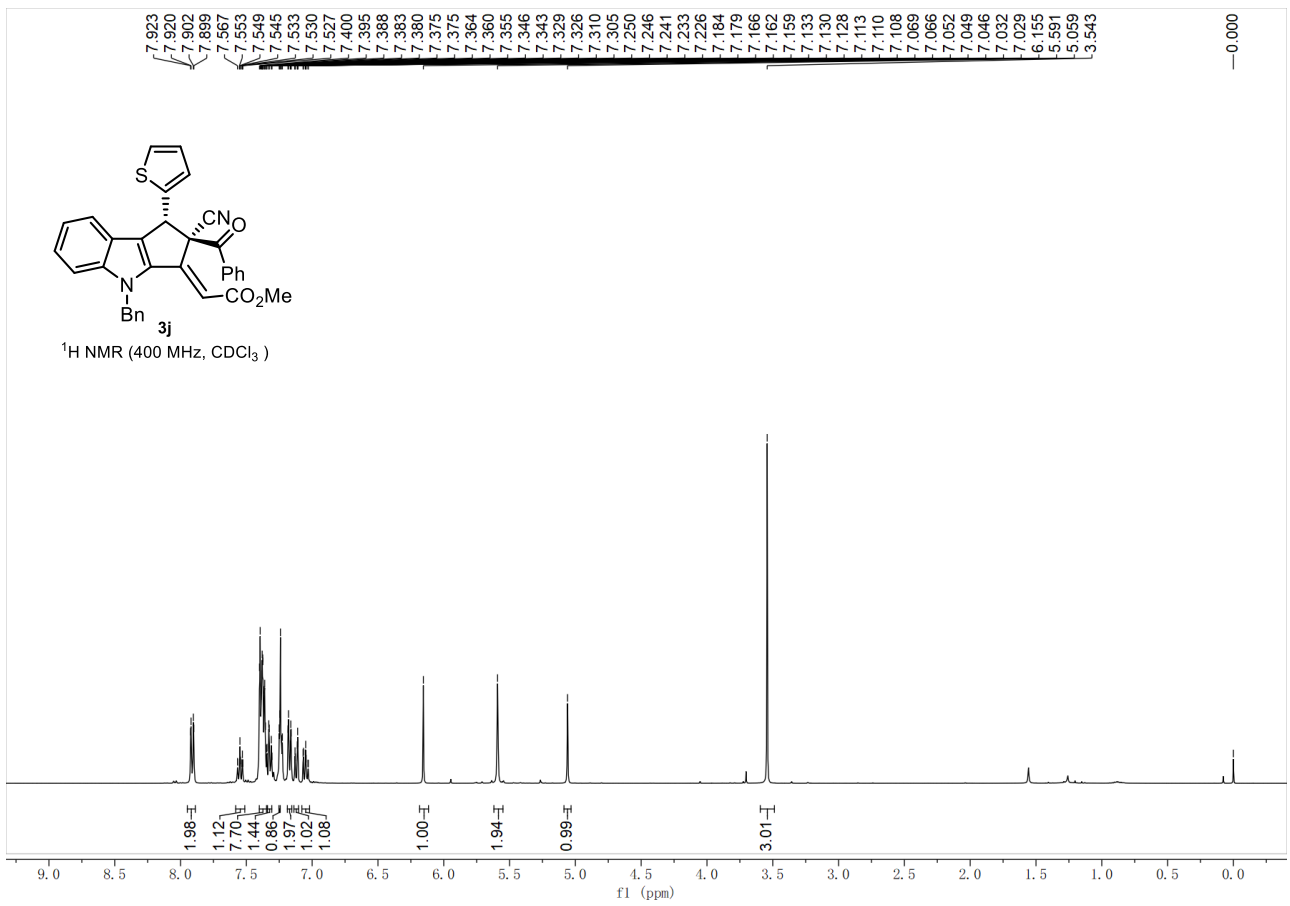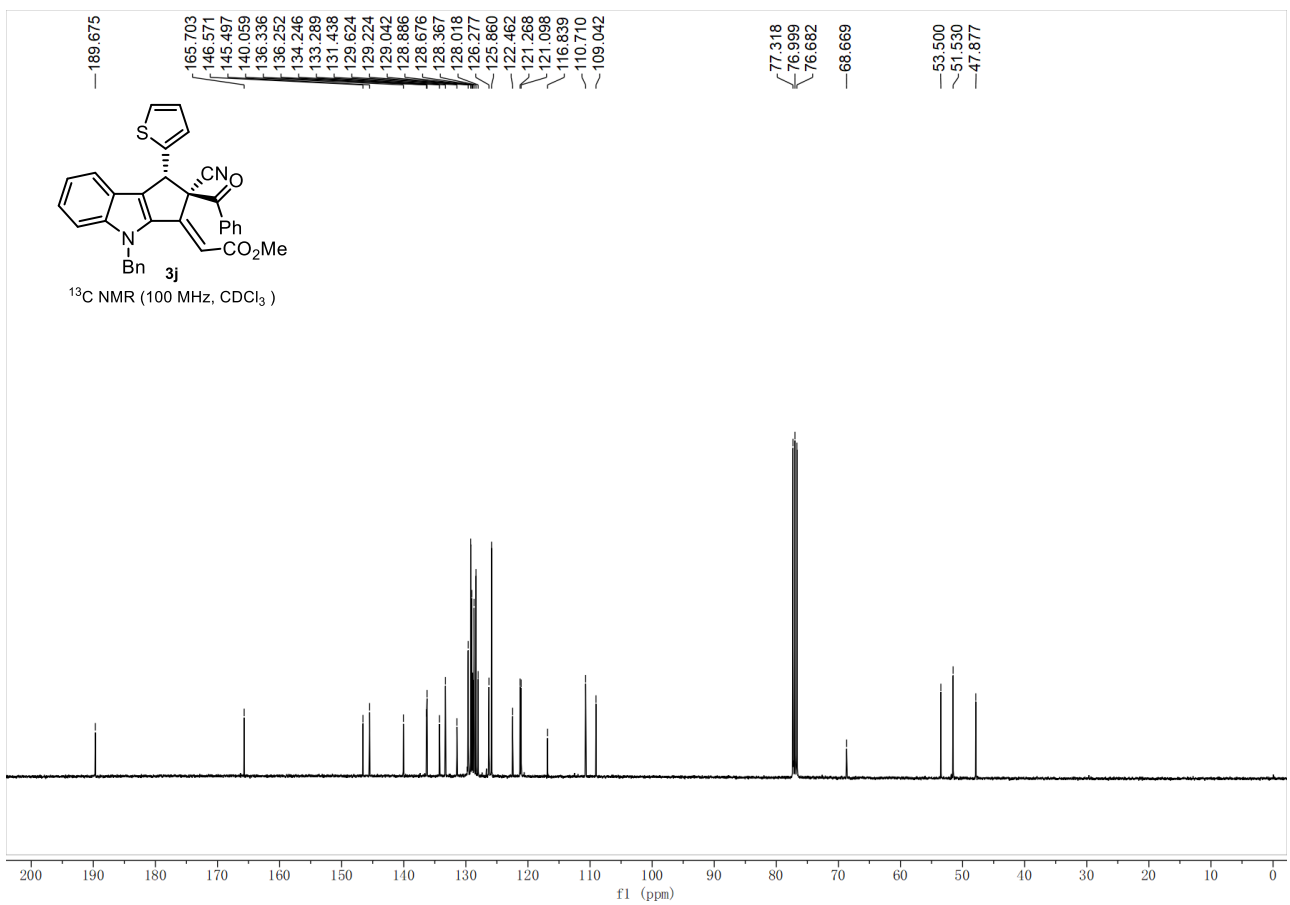



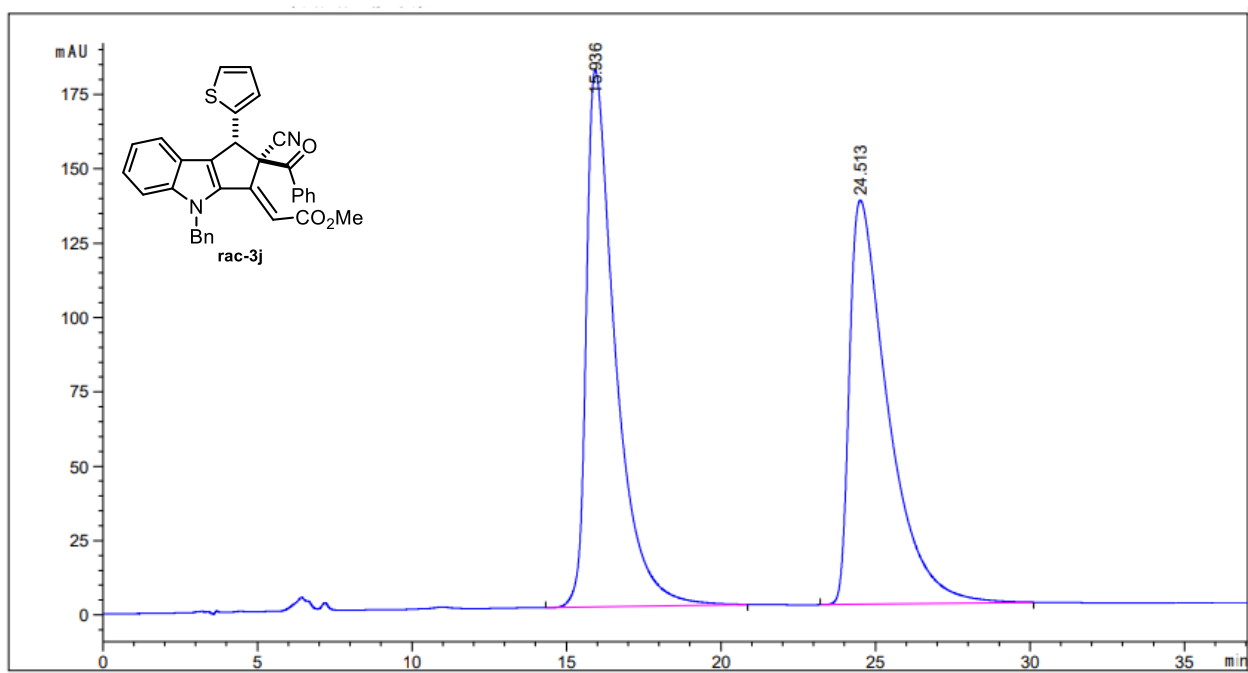

| # | [min]     | [min]  | [mAU*s]   | [mAU]     | %       |
|---|-----------|--------|-----------|-----------|---------|
| 1 | 15.936 BB | 0.9618 | 1.18417e4 | 180.54533 | 50.1643 |
| 2 | 24.513 BB | 1.2725 | 1.17641e4 | 135.83820 | 49.8357 |

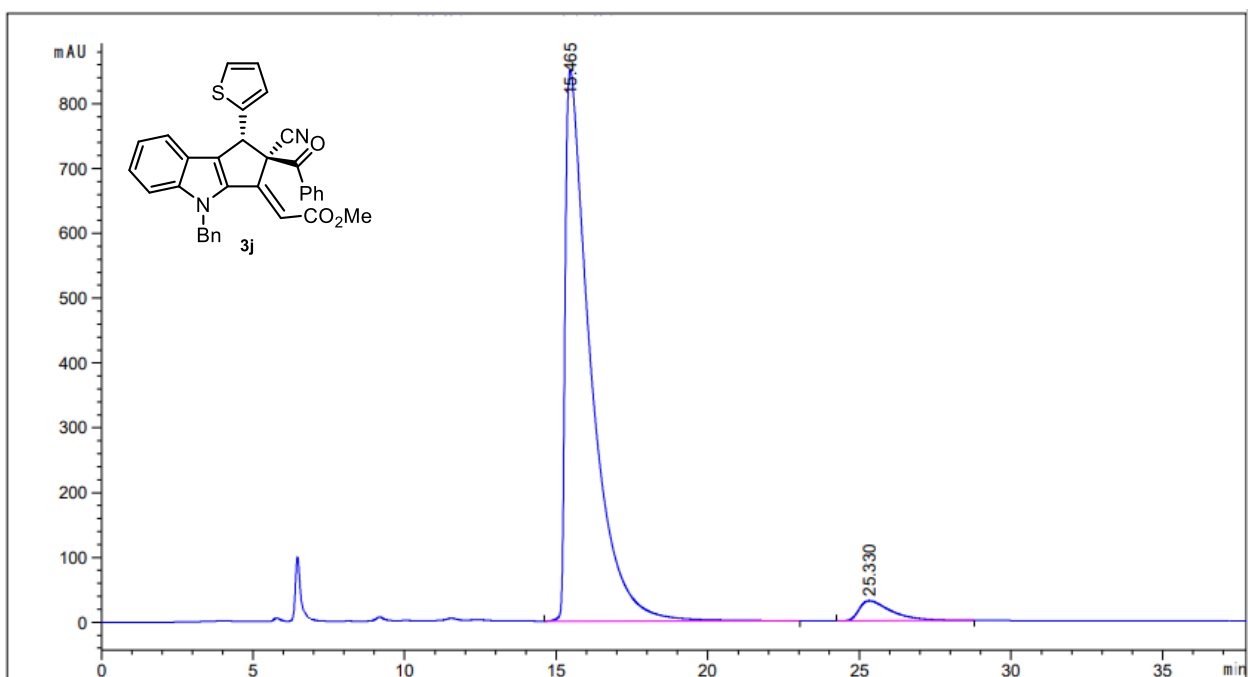

| # | [min]     | [min]  | [mAU*s]    | [mAU]     | %       |
|---|-----------|--------|------------|-----------|---------|
| 1 | 15.465 BB | 0.8201 | 4.93233e4  | 849.45795 | 95.5379 |
| 2 | 25.330 BB | 1.0859 | 2303.64648 | 30.98013  | 4.4621  |

| Name           | CYC-220406-38   | Rack Pos.    | Instrument     | Instrument 1 | Operator                                           |
|----------------|-----------------|--------------|----------------|--------------|----------------------------------------------------|
| Inj. Vol. (ul) | 8               | Plate Pos.   | IRM Status     | Success      |                                                    |
| Data File      | CYC-220406-38.d | Method (Acq) | ZYJ-20201106.m | Comment      | Acq. Time (Local) 4/9/2022 10:55:16 AM (UTC+08:00) |

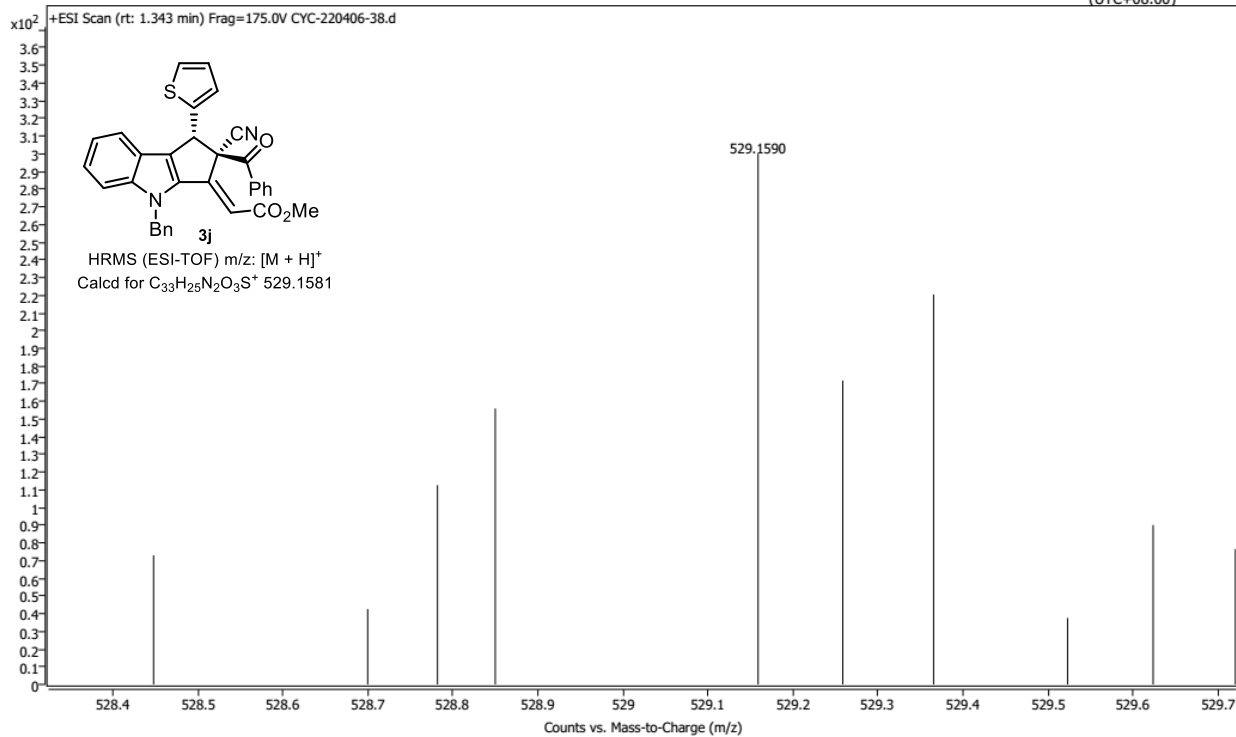

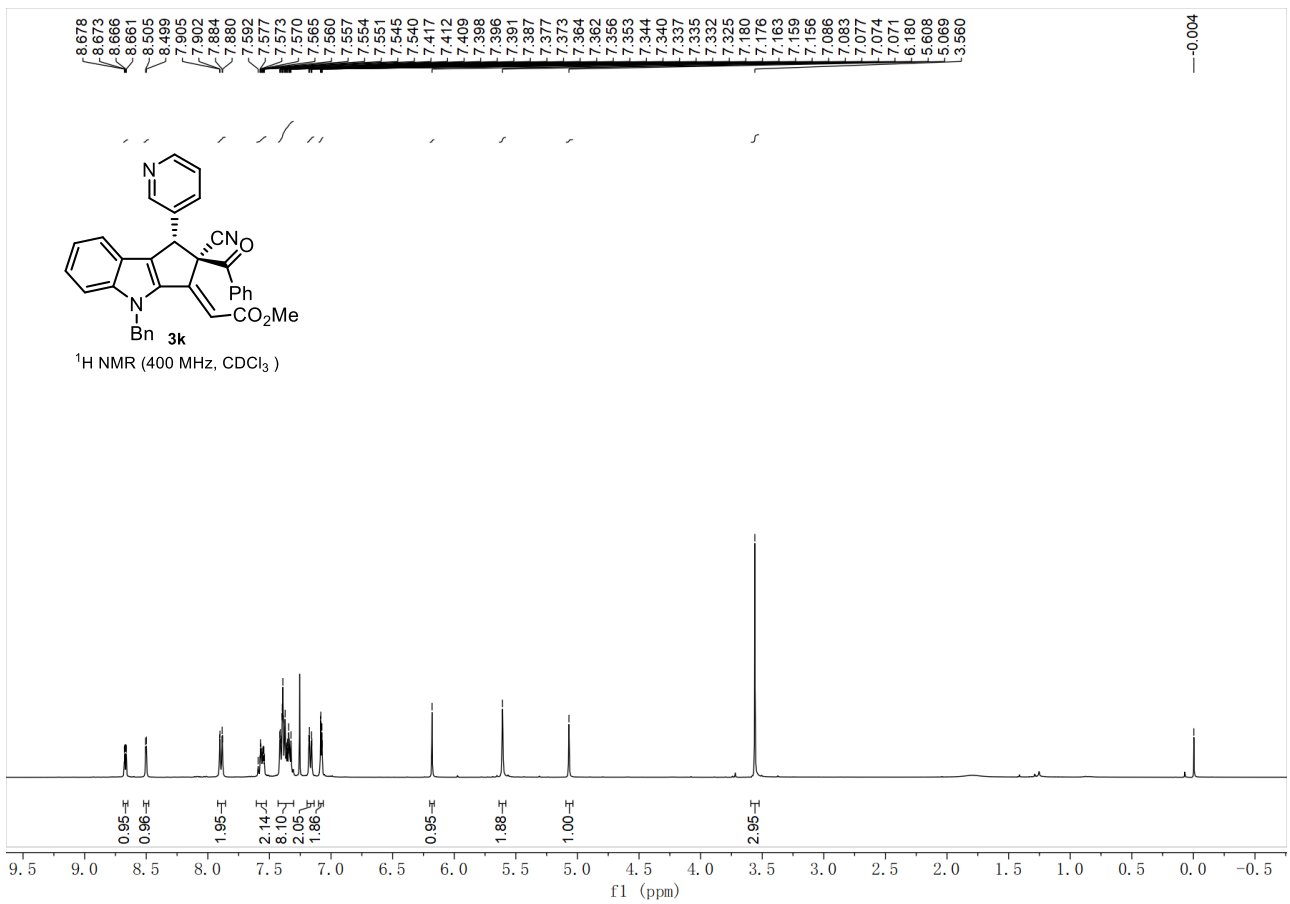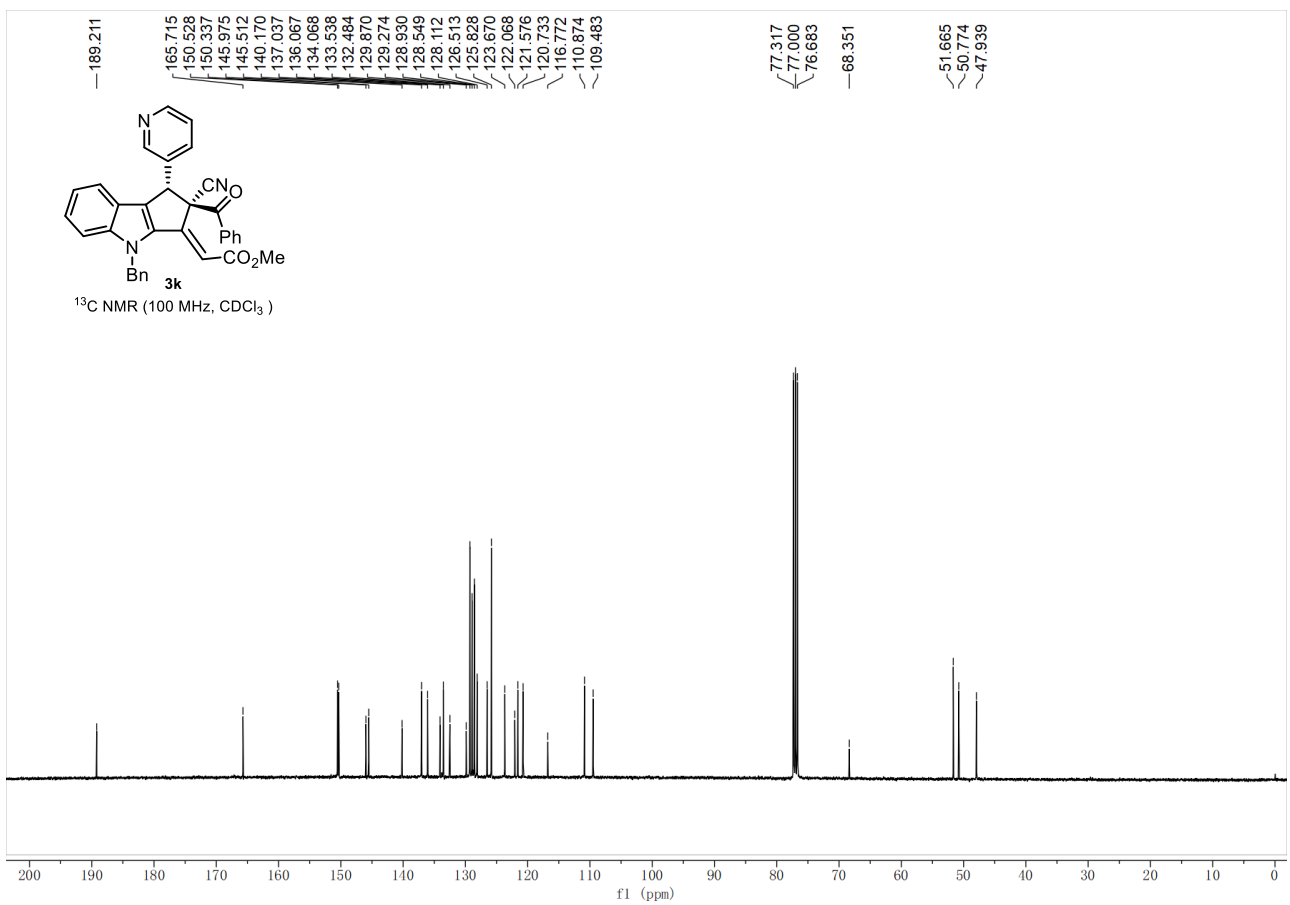

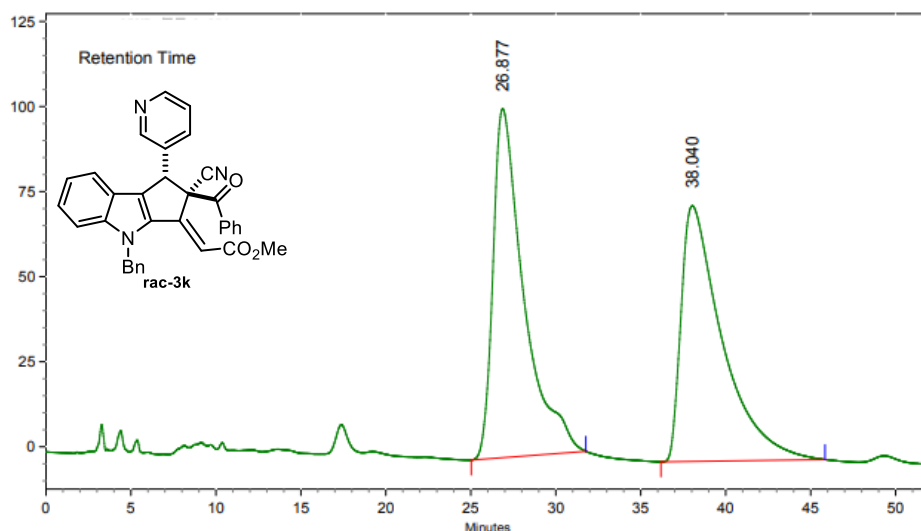

### AREA PERCENT REPORT

| Peak No. | Ret Time | Width | Height  | Area      | Area [%] |
|----------|----------|-------|---------|-----------|----------|
| 1        | 26.877   | 6.743 | 1720277 | 216448465 | 50.5905  |
| 2        | 38.040   | 9.660 | 1260471 | 211395288 | 49.4095  |

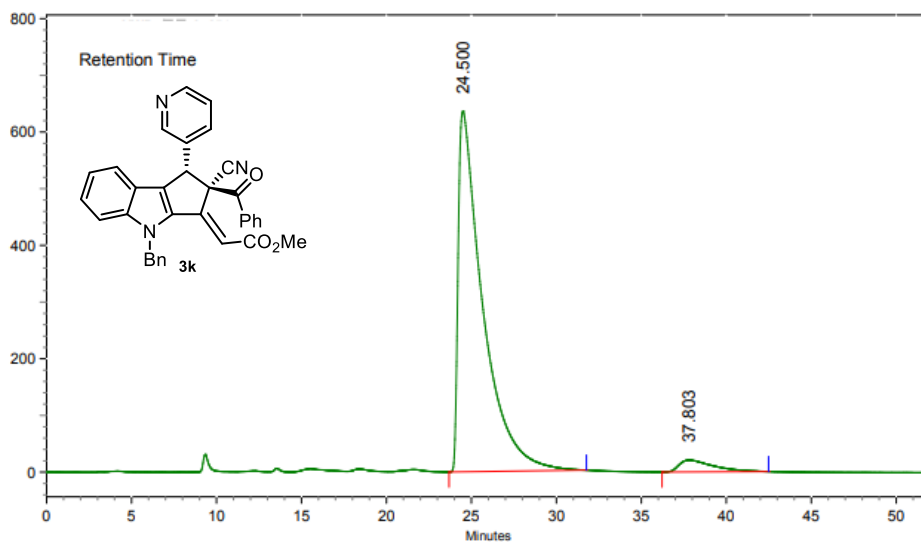

### AREA PERCENT REPORT

| Peak No. | Ret Time | Width | Height   | Area       | Area [%] |
|----------|----------|-------|----------|------------|----------|
| 1        | 24.500   | 8.080 | 10668682 | 1066770812 | 95.6273  |
| 2        | 37.803   | 6.267 | 349035   | 48779251   | 4.3727   |

|                |                 |              |                |            |              |                                                    |
|----------------|-----------------|--------------|----------------|------------|--------------|----------------------------------------------------|
| Name           | CYC-220406-40   | Rack Pos.    |                | Instrument | Instrument 1 | Operator                                           |
| Inj. Vol. (ul) | 8               | Plate Pos.   |                | IRM Status | Success      |                                                    |
| Data File      | CYC-220406-40.d | Method (Acq) | ZYJ-20201106.m | Comment    |              | Acq. Time (Local) 4/9/2022 11:01:10 AM (UTC+08:00) |

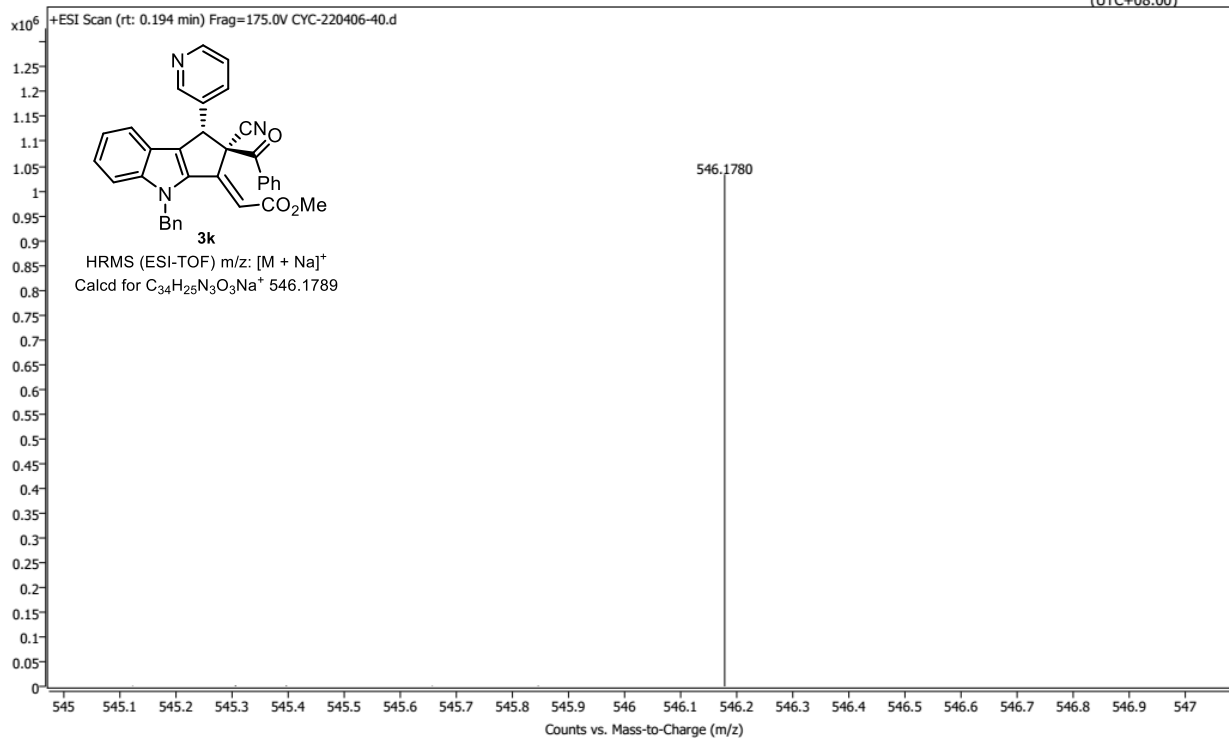

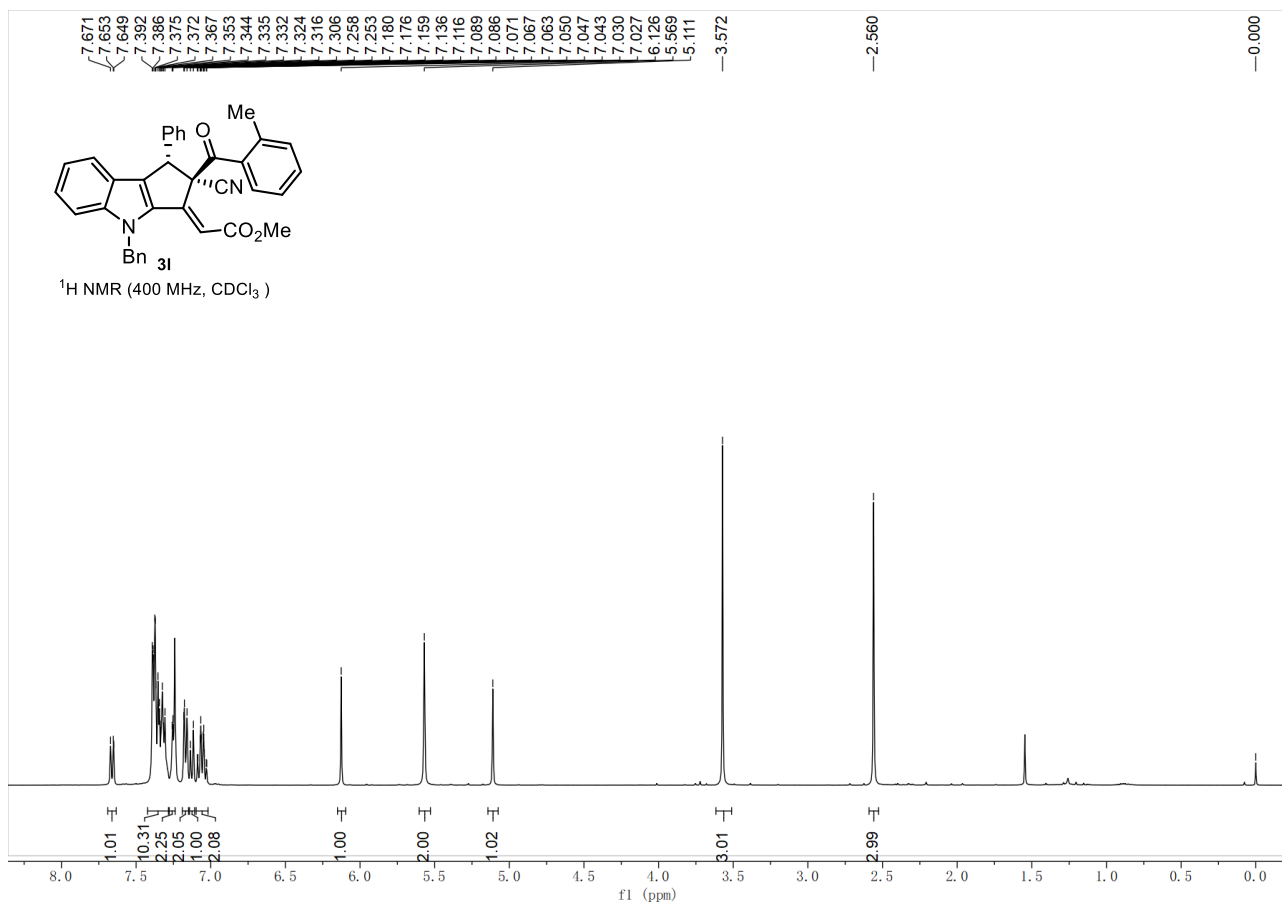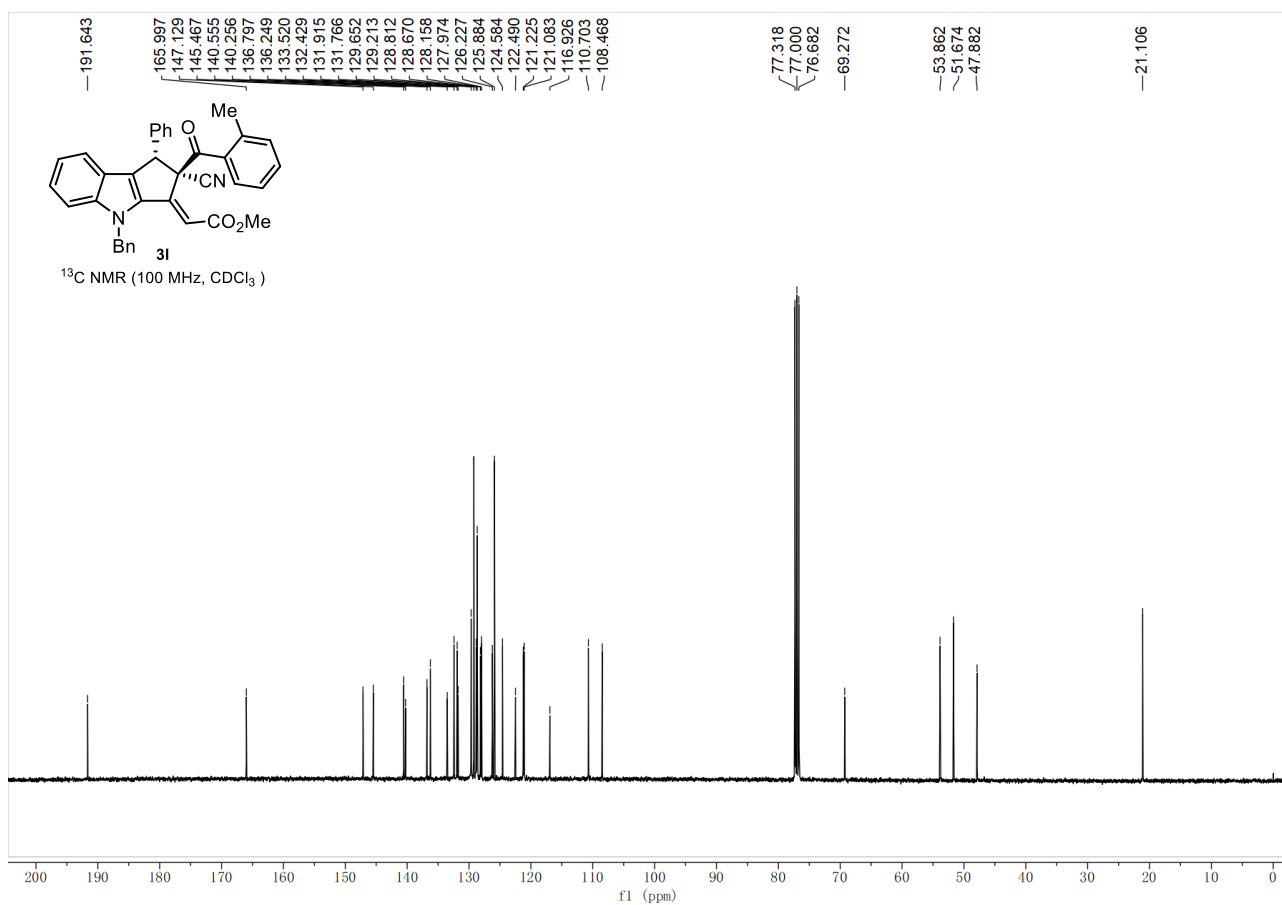

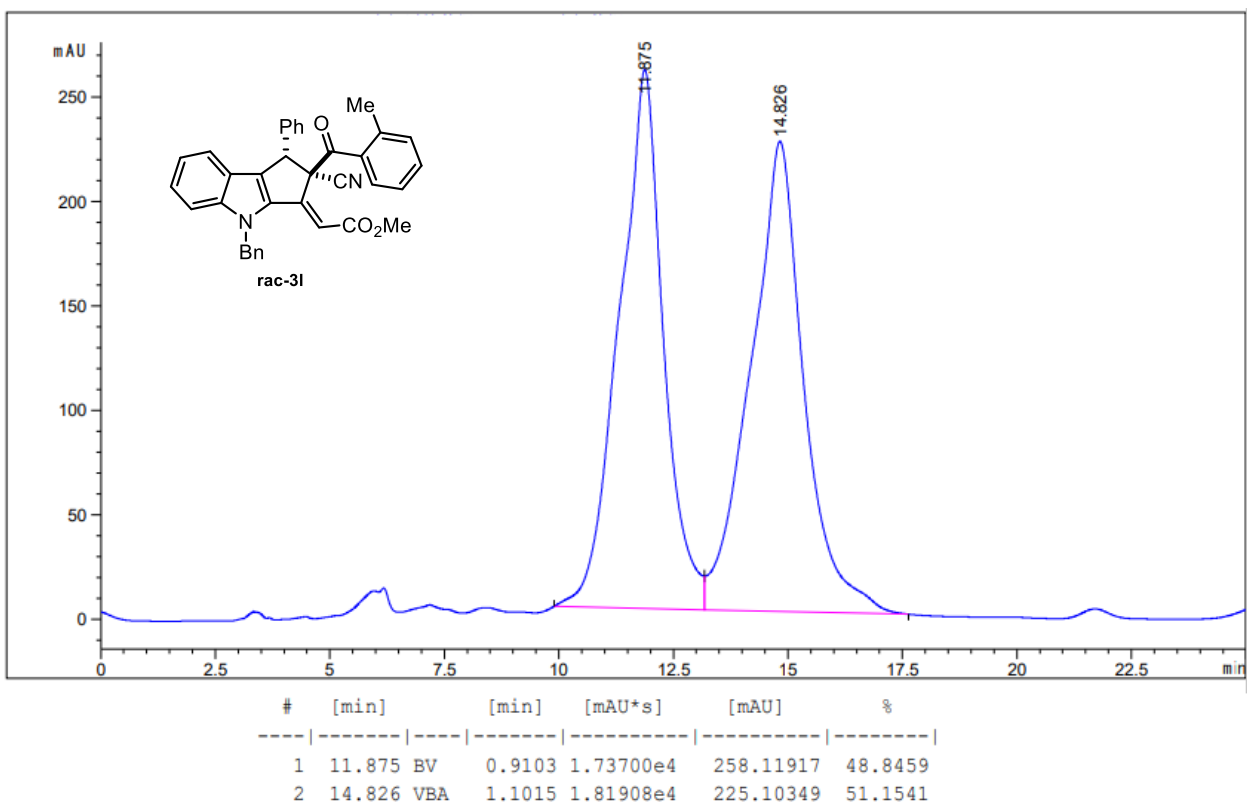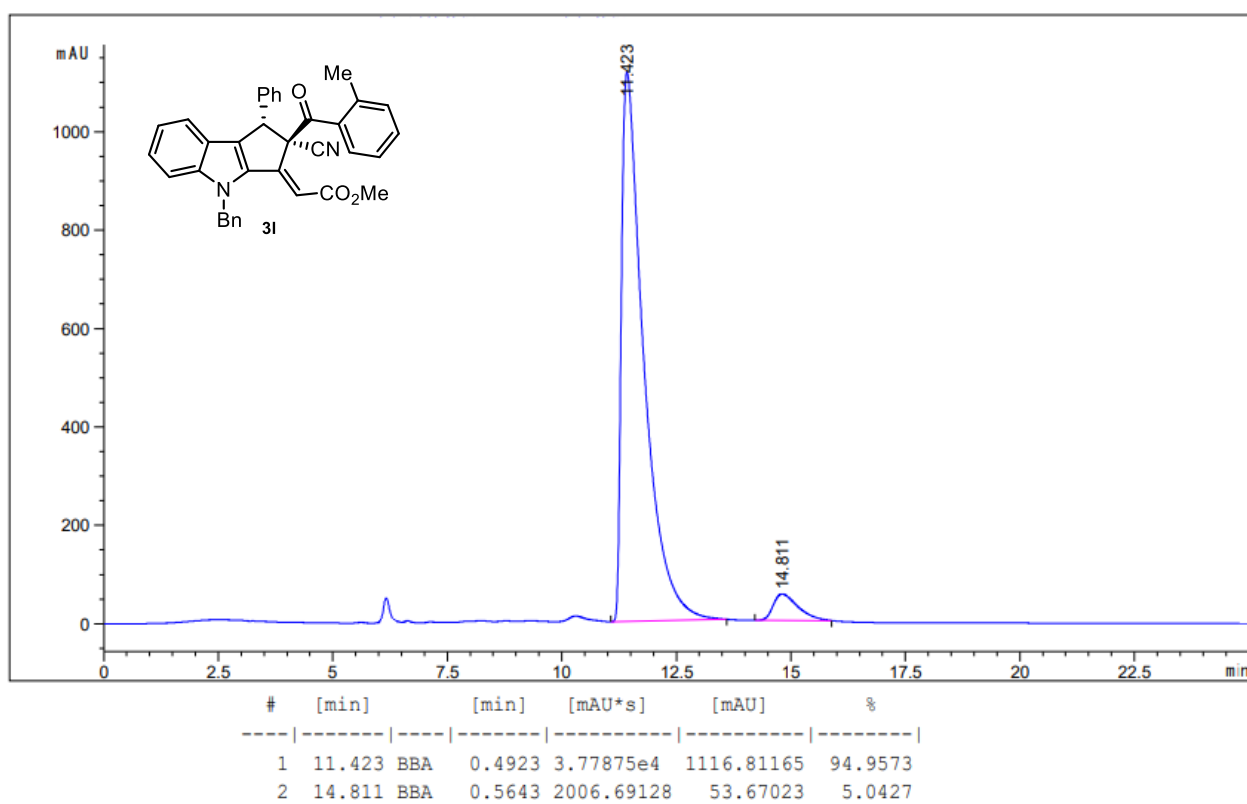

Name: CYC-220406-44      Rack Pos.:  
Inj. Vol. (ul): 8      Plate Pos.:  
Data File: CYC-220406-44.d      Method (Acq): ZYJ-20201106.m      Instrument: IRM Status: Comment: Instrument 1 Success: Operator: Acq. Time (Local): 4/9/2022 11:12:58 AM (UTC+08:00)

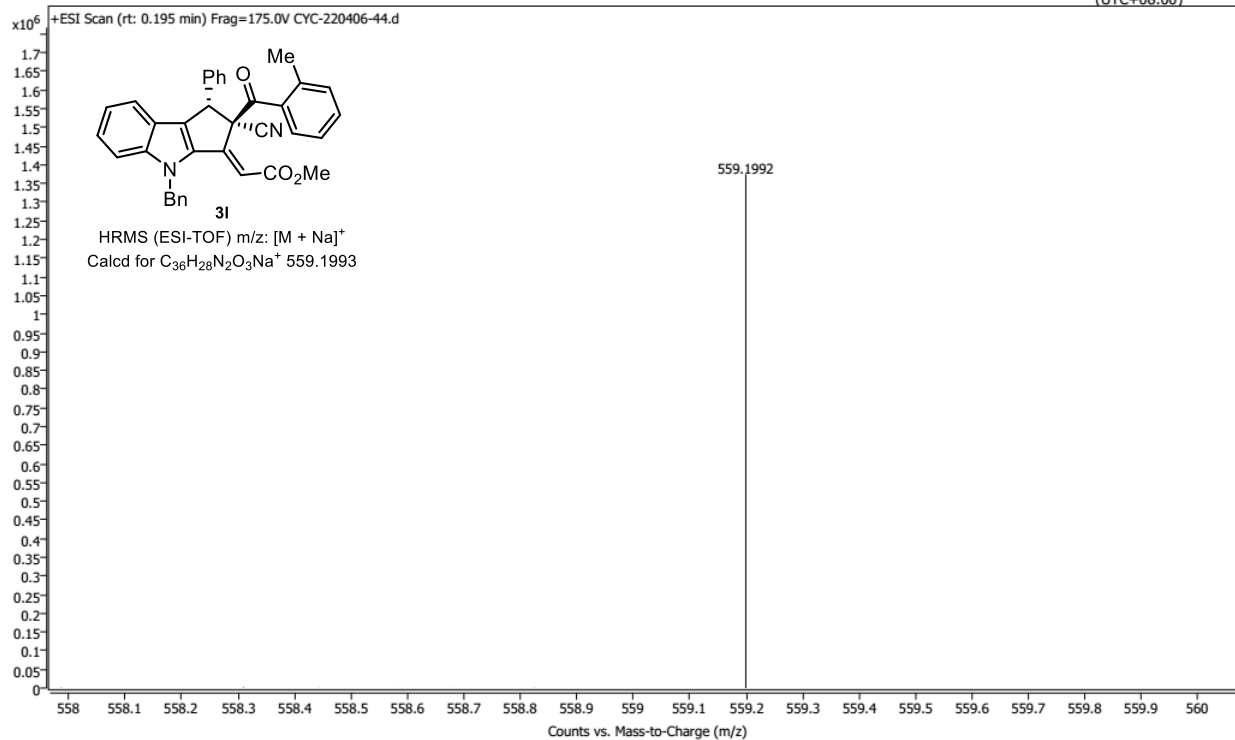



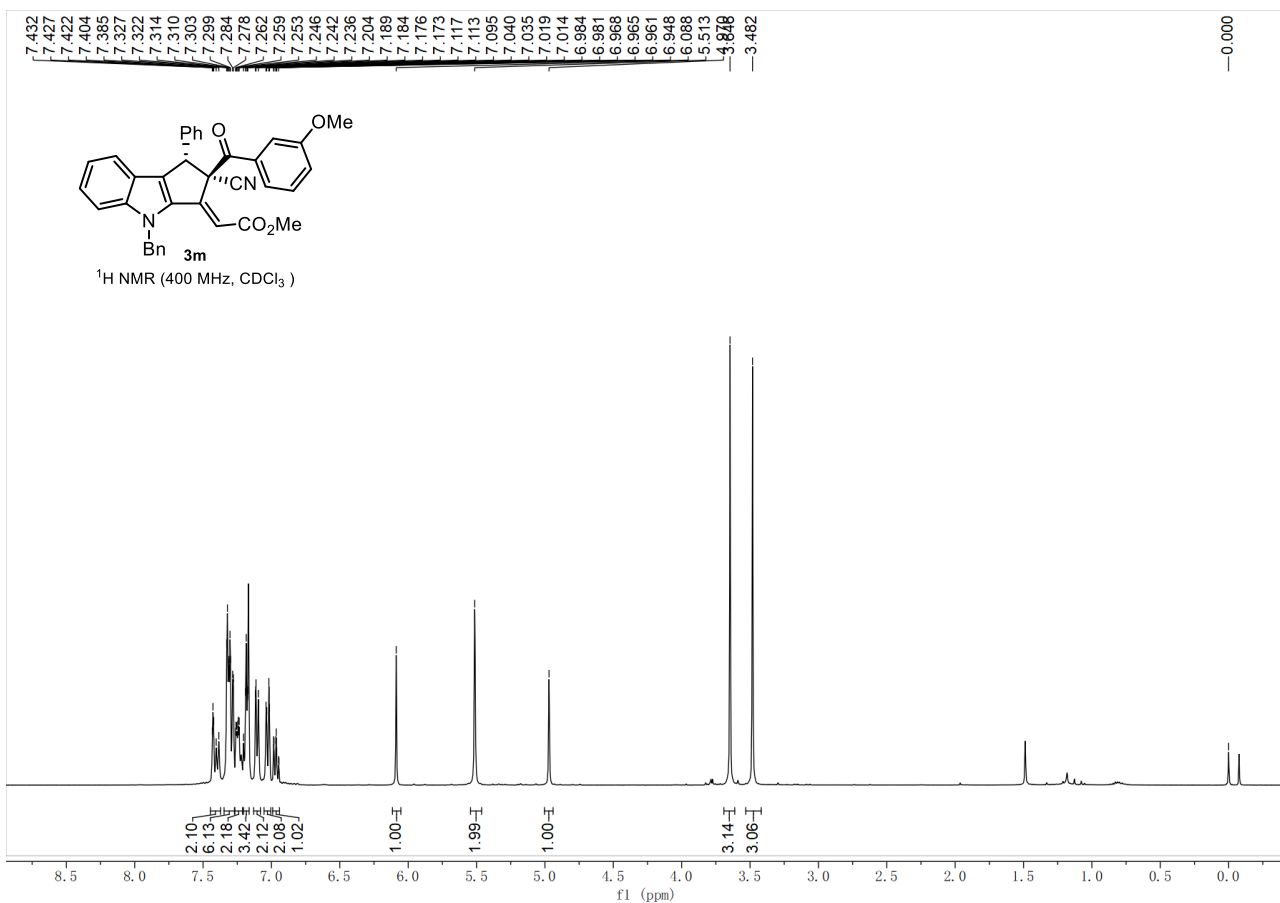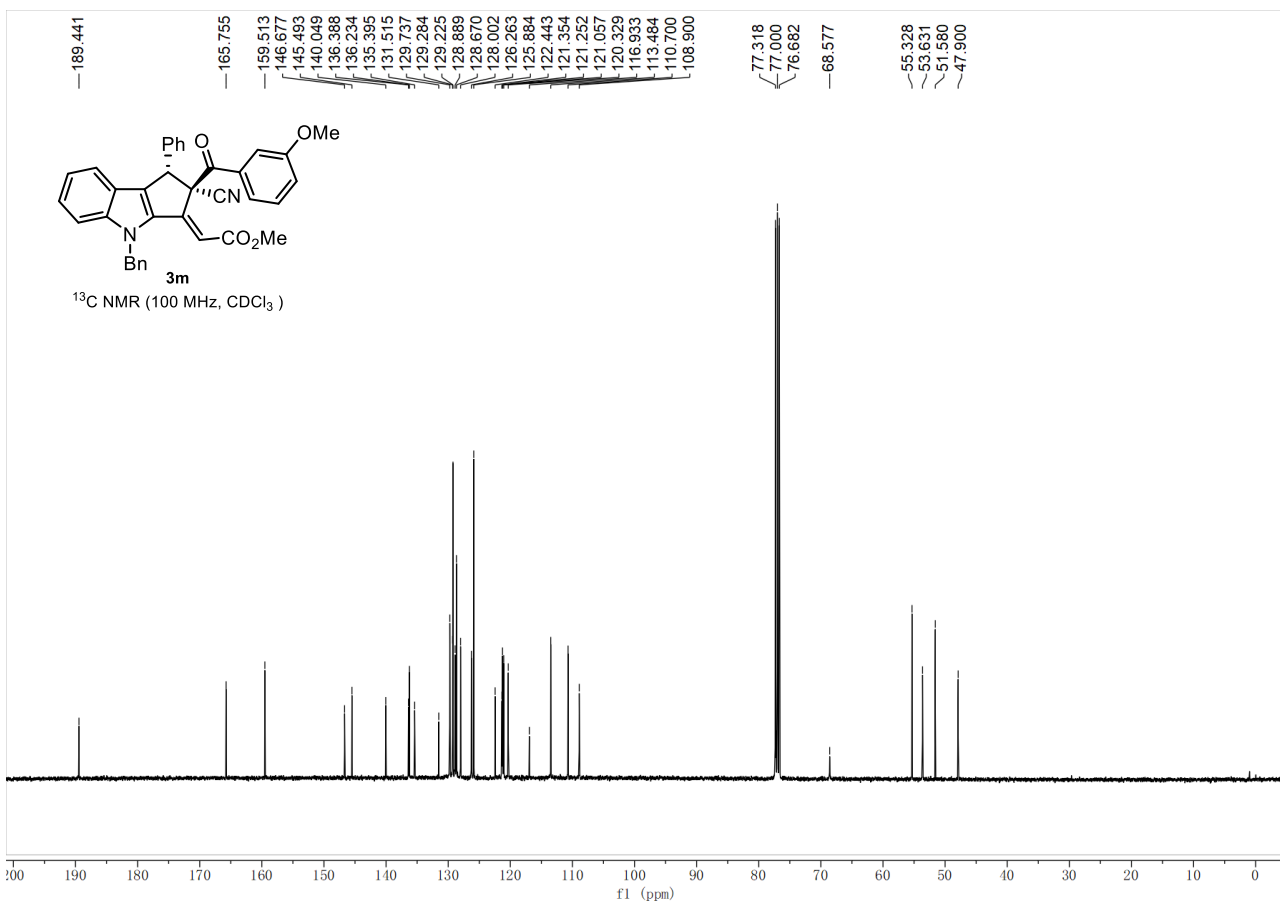

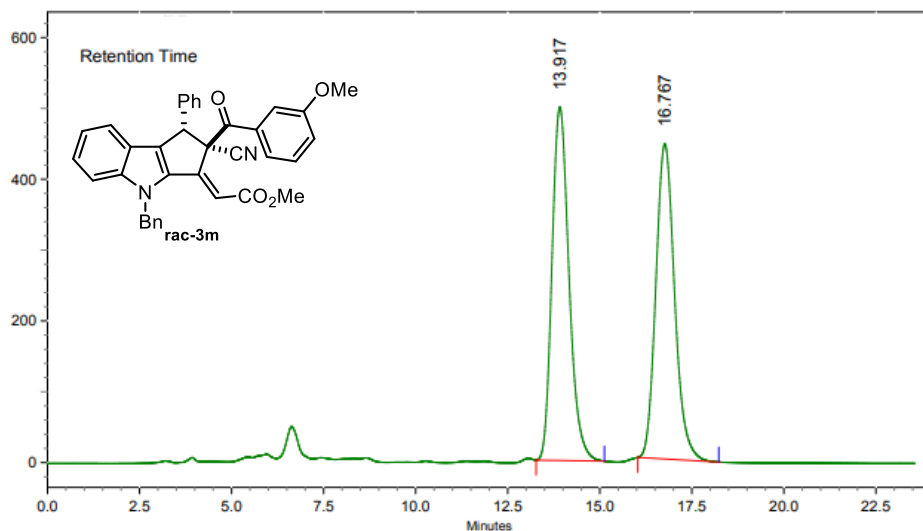

### AREA PERCENT REPORT

| Peak No. | Ret Time | Width | Height  | Area      | Area [%] |
|----------|----------|-------|---------|-----------|----------|
| 1        | 13.917   | 1.857 | 8370363 | 268723777 | 50.4536  |
| 2        | 16.767   | 2.200 | 7463371 | 263891976 | 49.5464  |

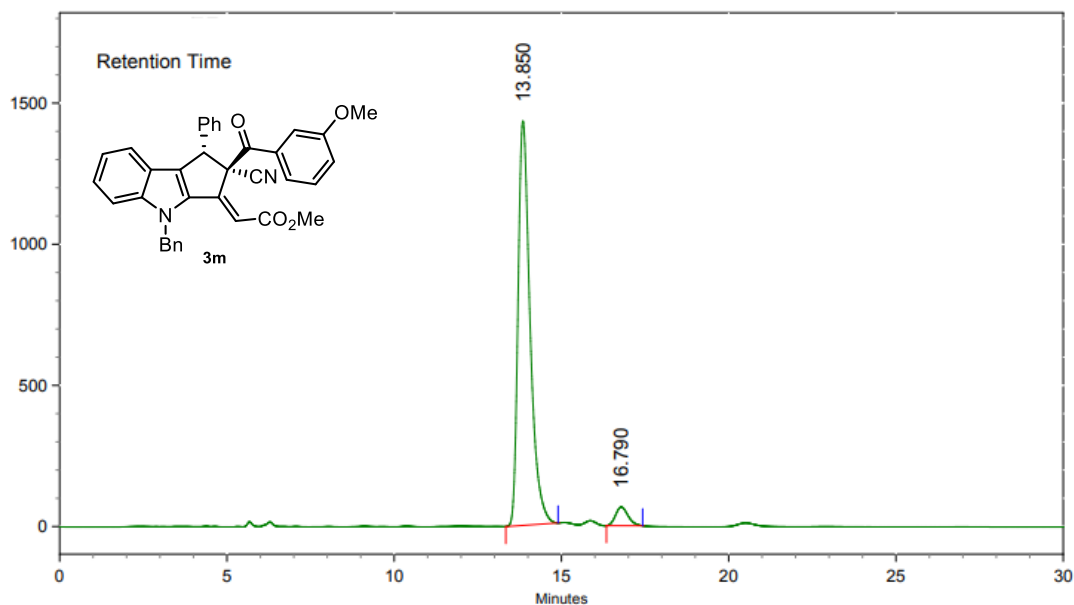

### AREA PERCENT REPORT

| Peak No. | Ret Time | Width | Height   | Area      | Area [%] |
|----------|----------|-------|----------|-----------|----------|
| 1        | 13.850   | 1.563 | 24038377 | 599013966 | 95.3890  |
| 2        | 16.790   | 1.080 | 1114030  | 28955369  | 4.6110   |

| Name           | CYC-220406-45   | Rack Pos.    | Instrument     | Instrument 1 | Operator                                           |
|----------------|-----------------|--------------|----------------|--------------|----------------------------------------------------|
| Inj. Vol. (ul) | 8               | Plate Pos.   | IRM Status     | Success      |                                                    |
| Data File      | CYC-220406-45.d | Method (Acq) | ZYJ-20201106.m | Comment      | Acq. Time (Local) 4/9/2022 11:15:55 AM (UTC+08:00) |

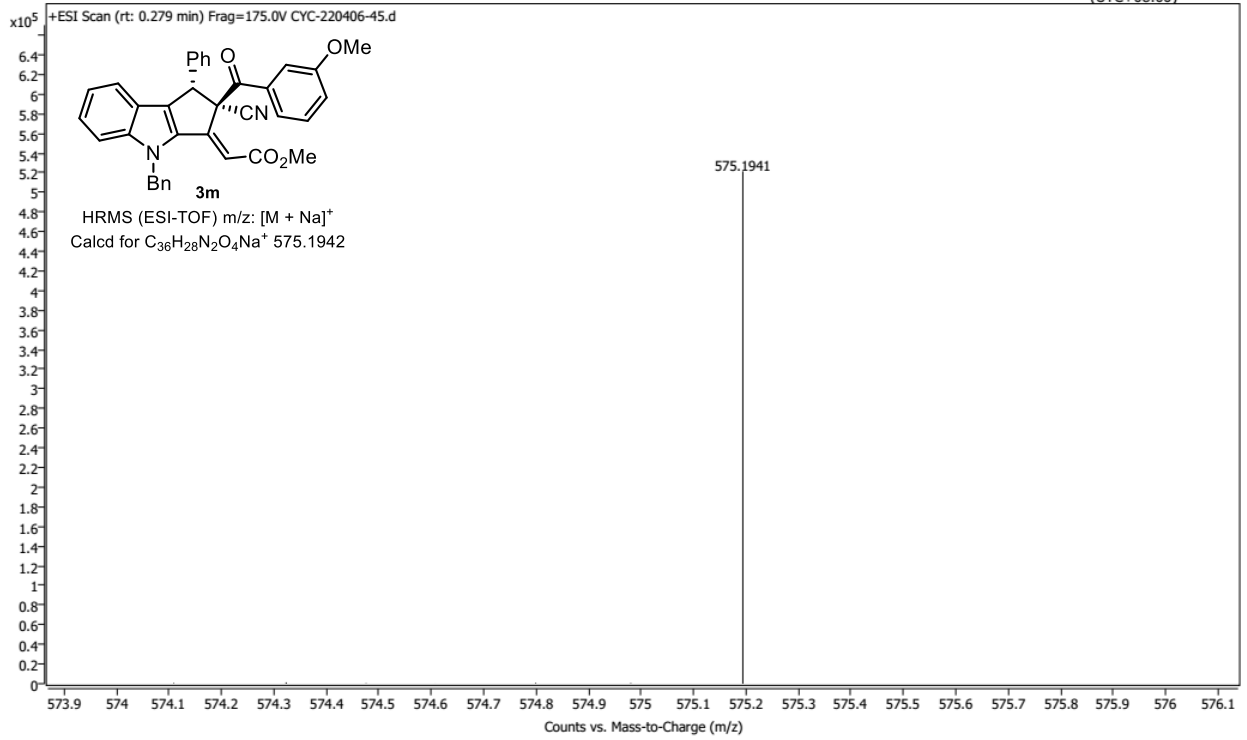

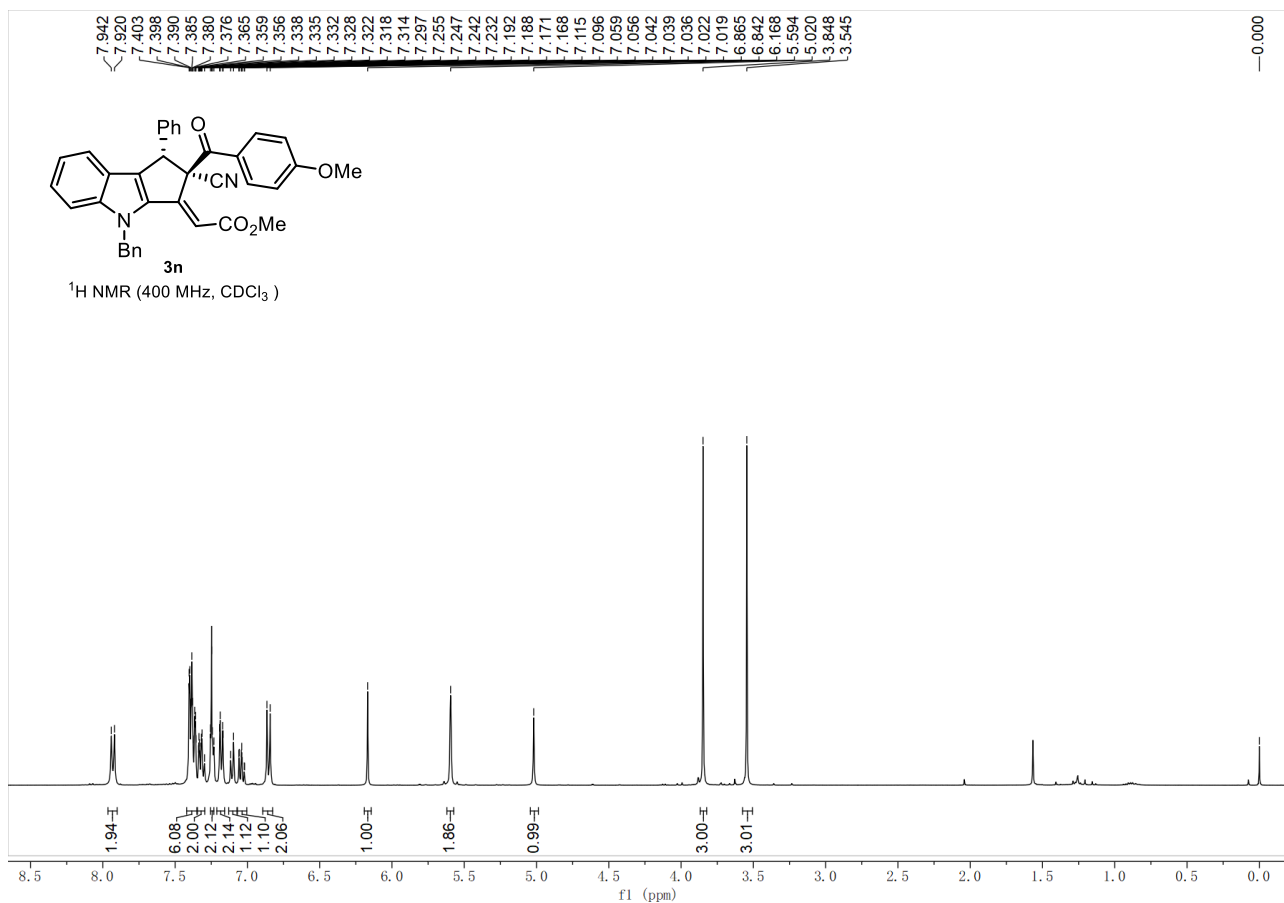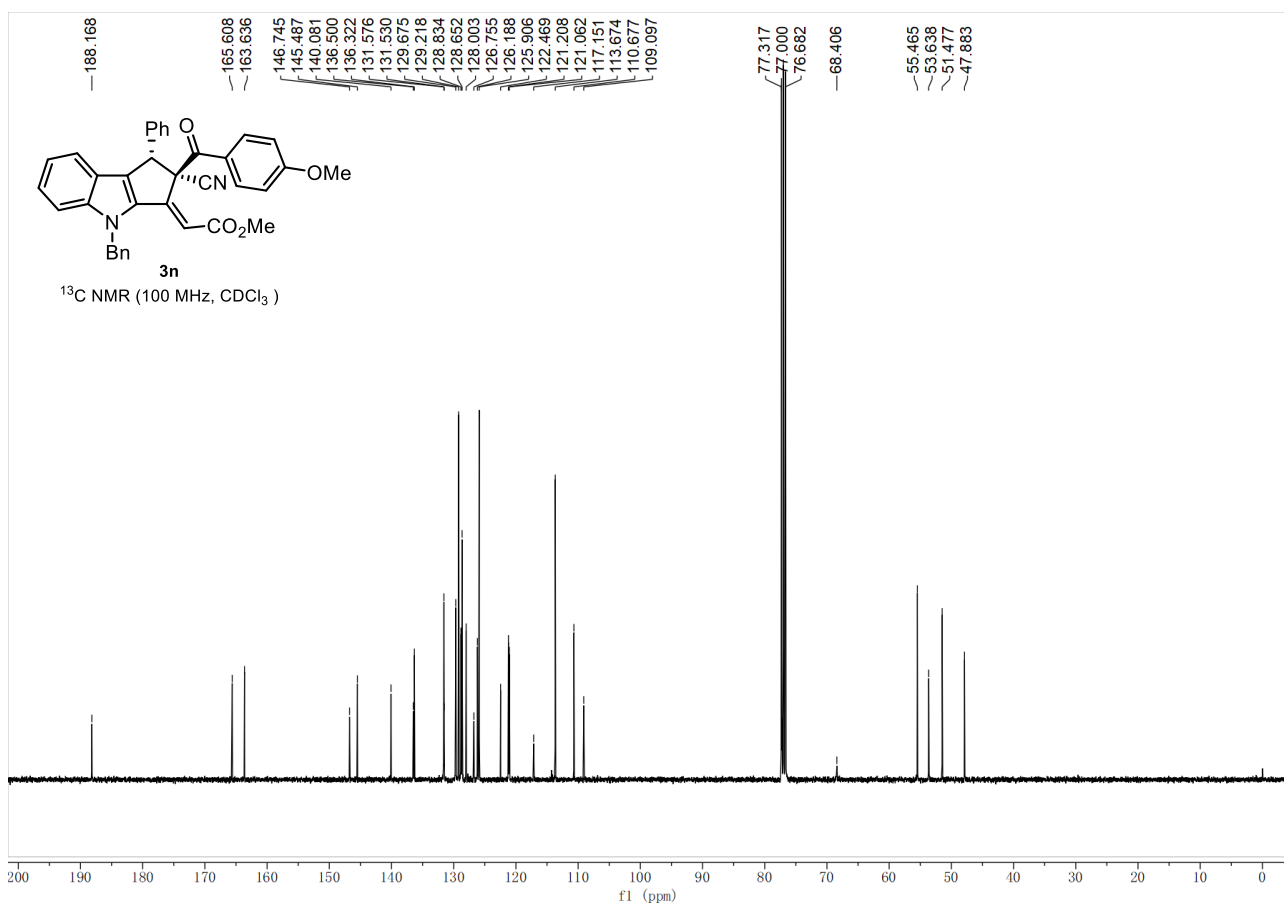

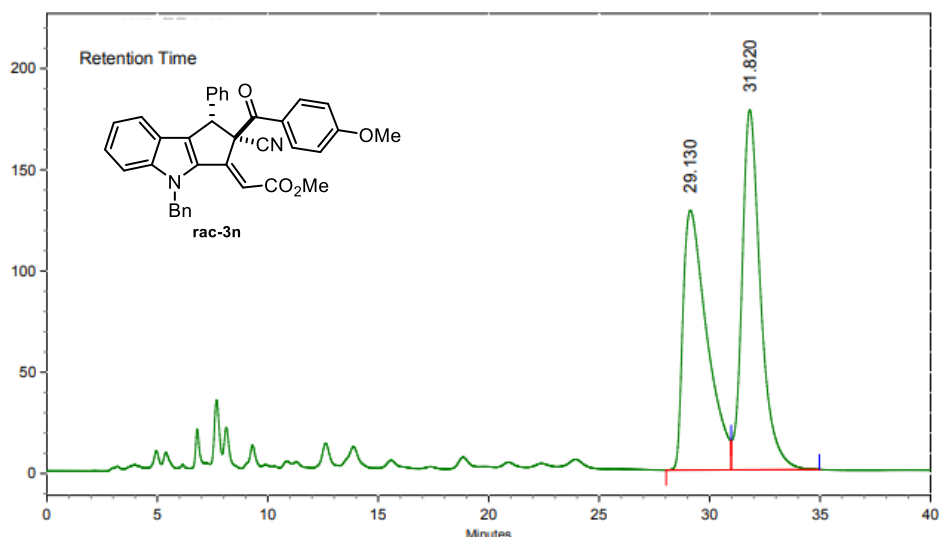

### AREA PERCENT REPORT

| Peak No. | Ret Time | Width | Height  | Area      | Area [%] |
|----------|----------|-------|---------|-----------|----------|
| 1        | 29.130   | 2.943 | 2151178 | 162161312 | 48.1460  |
| 2        | 31.820   | 3.990 | 2982721 | 174650024 | 51.8540  |

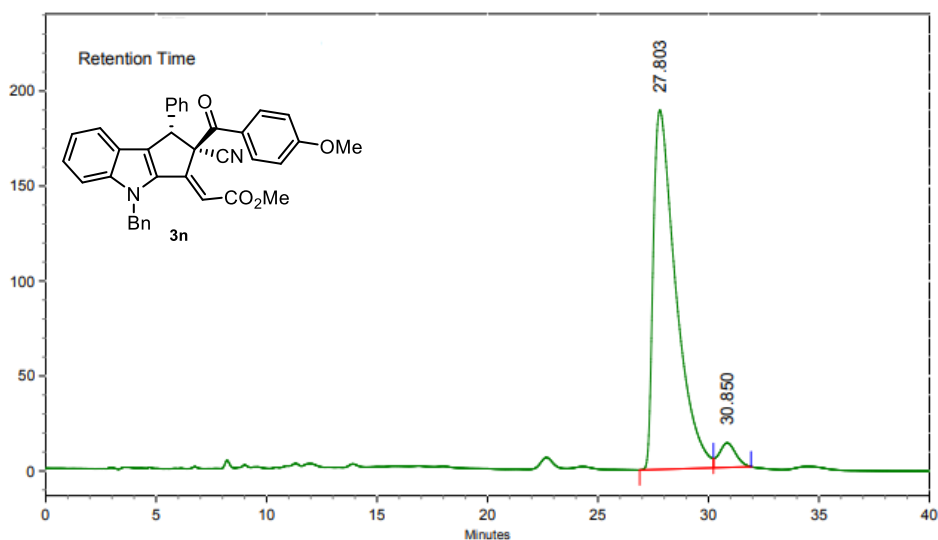

### AREA PERCENT REPORT

| Peak No. | Ret Time | Width | Height  | Area      | Area [%] |
|----------|----------|-------|---------|-----------|----------|
| 1        | 27.803   | 3.337 | 3173152 | 225559844 | 95.1760  |
| 2        | 30.850   | 1.703 | 216535  | 11432497  | 4.8240   |

| Name           | CYC-220406-32   | Rack Pos.    | Instrument     | Instrument 1 | Operator                                           |
|----------------|-----------------|--------------|----------------|--------------|----------------------------------------------------|
| Inj. Vol. (ul) | 8               | Plate Pos.   | IRM Status     | Success      |                                                    |
| Data File      | CYC-220406-32.d | Method (Acq) | ZYJ-20201106.m | Comment      | Acq. Time (Local) 4/9/2022 10:08:28 AM (UTC+08:00) |

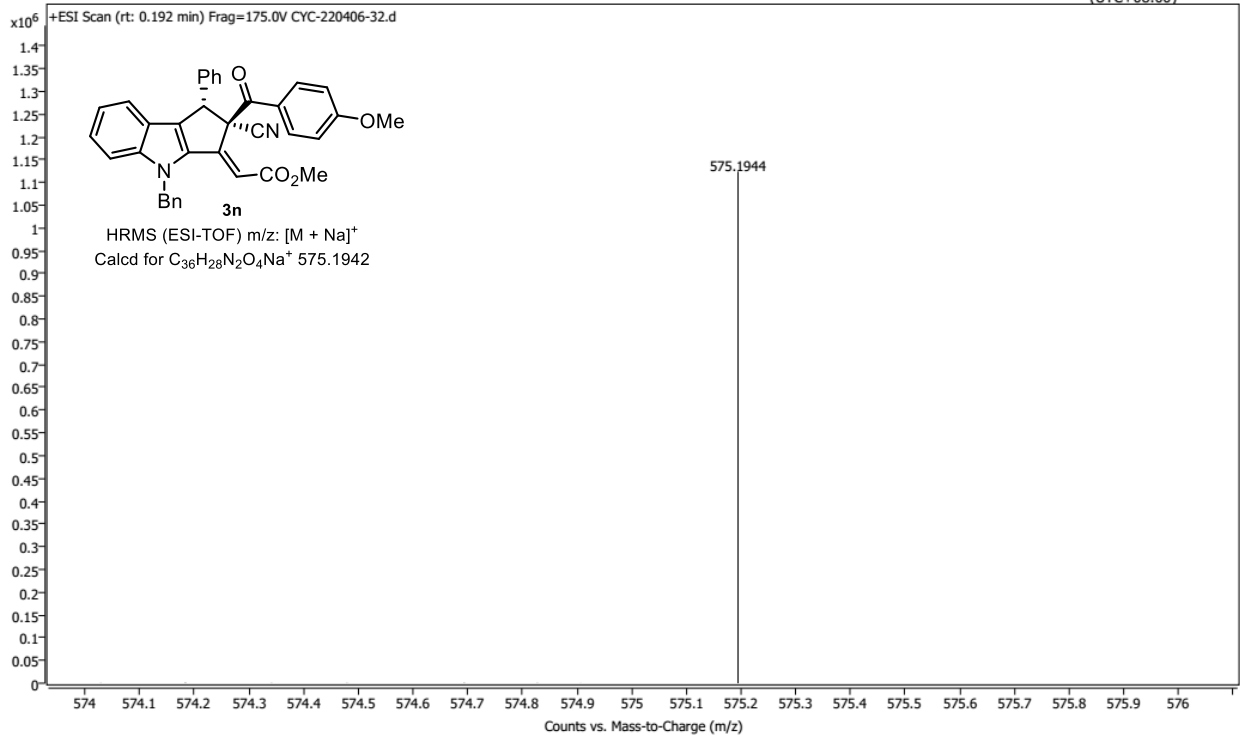

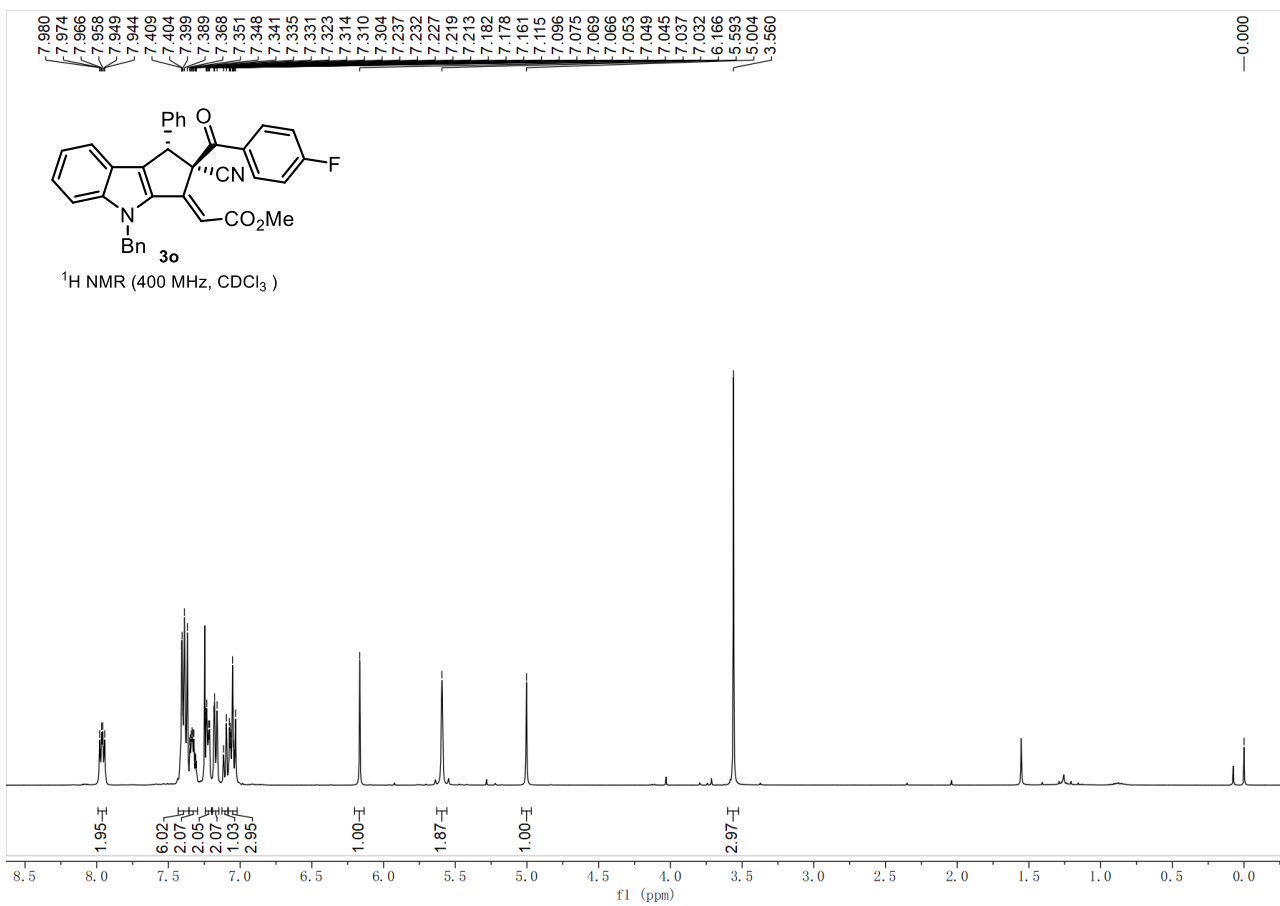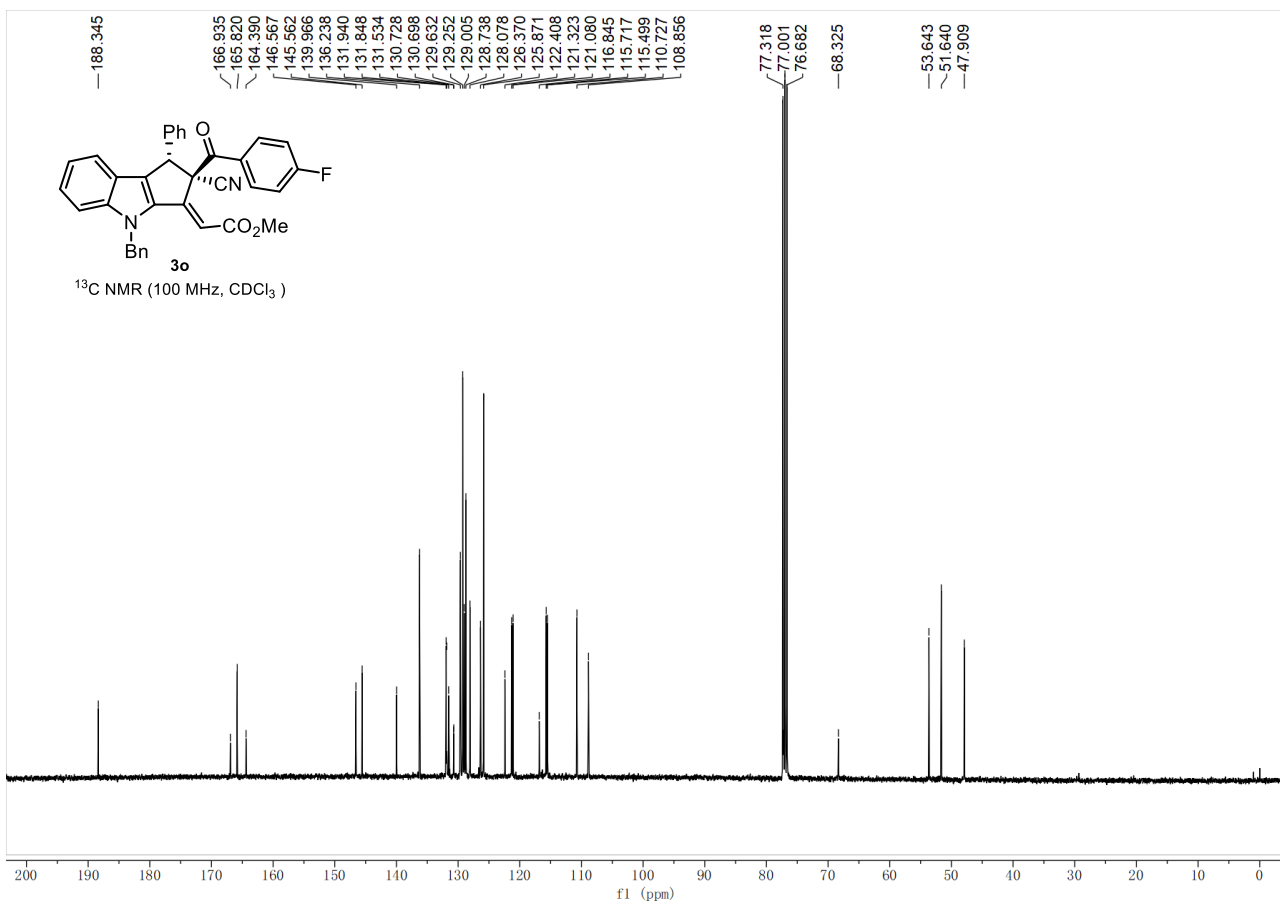

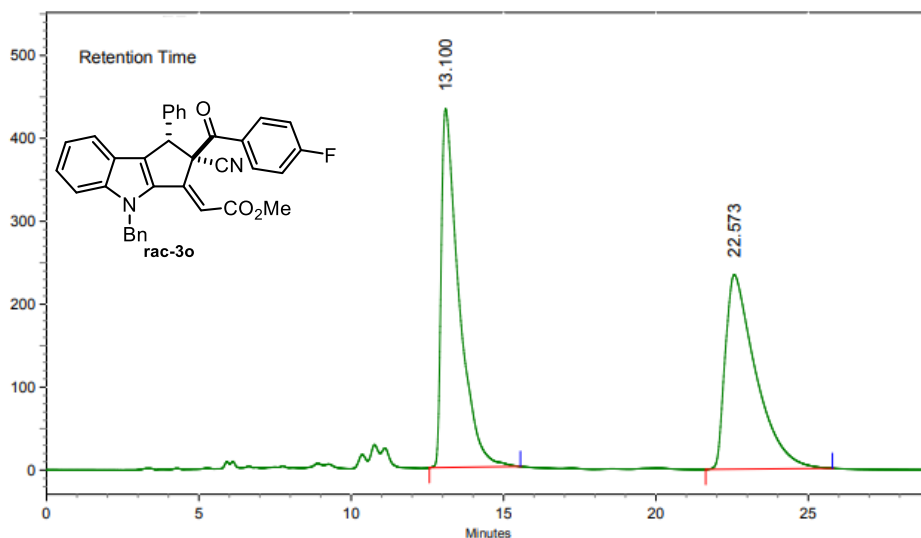

### AREA PERCENT REPORT

| Peak No. | Ret Time | Width | Height  | Area      | Area [%] |
|----------|----------|-------|---------|-----------|----------|
| 1        | 13.100   | 2.987 | 7255656 | 292906758 | 51.6780  |
| 2        | 22.573   | 4.160 | 3934370 | 273885073 | 48.3220  |

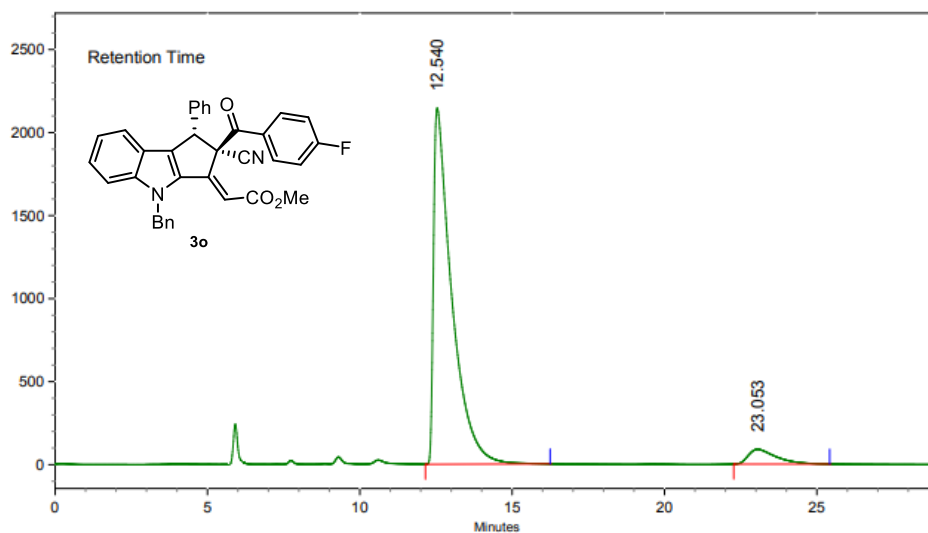

### AREA PERCENT REPORT

| Peak No. | Ret Time | Width | Height   | Area       | Area [%] |
|----------|----------|-------|----------|------------|----------|
| 1        | 12.540   | 4.093 | 35980476 | 1490787818 | 94.0316  |
| 2        | 23.053   | 3.147 | 1498793  | 94623682   | 5.9684   |



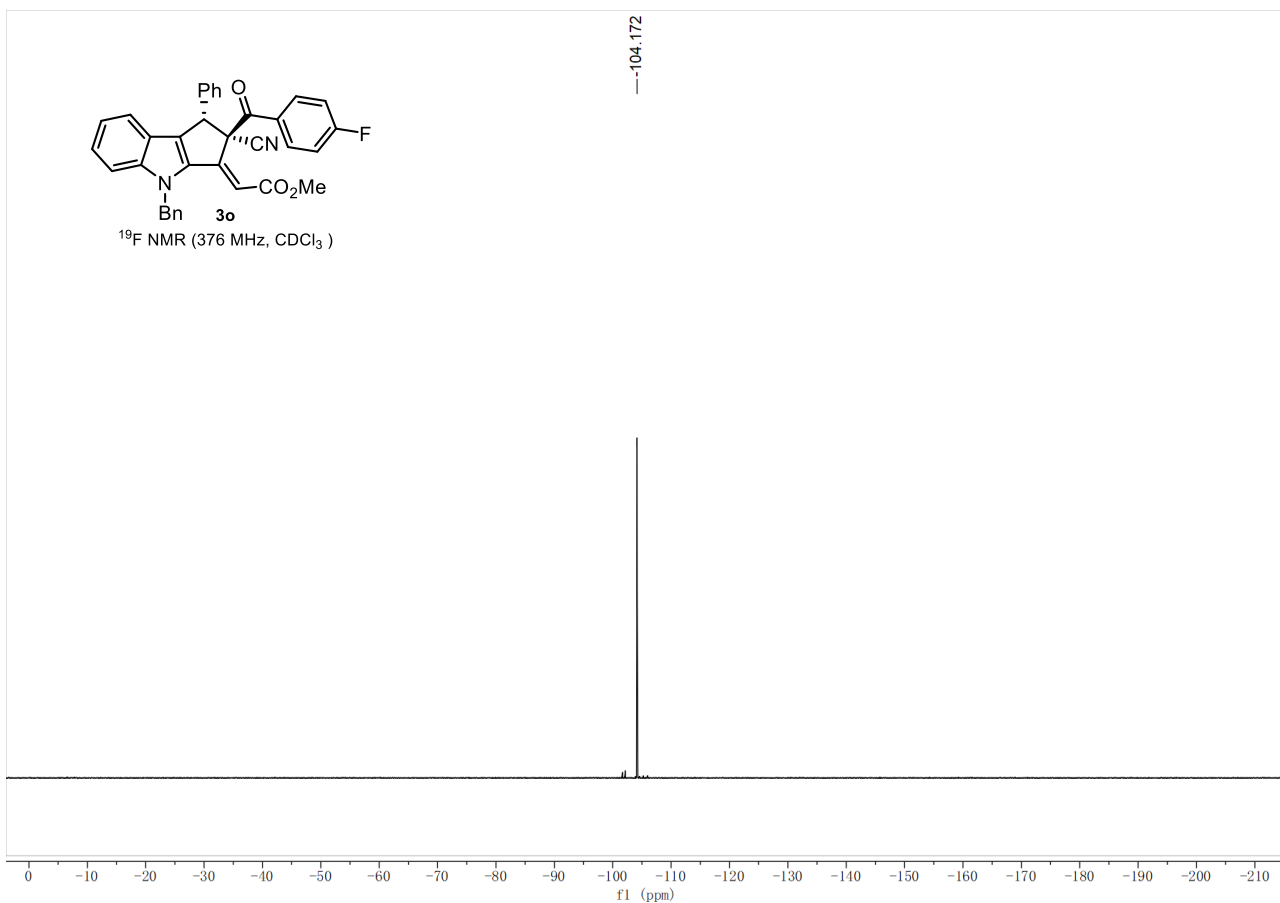

| Name           | CYC-220406-33   | Rack Pos.    | Instrument     | Instrument 1 | Operator                                           |
|----------------|-----------------|--------------|----------------|--------------|----------------------------------------------------|
| Inj. Vol. (ul) | 8               | Plate Pos.   | IRM Status     | Success      |                                                    |
| Data File      | CYC-220406-33.d | Method (Acq) | ZYJ-20201106.m | Comment      | Acq. Time (Local) 4/9/2022 10:11:26 AM (UTC+08:00) |

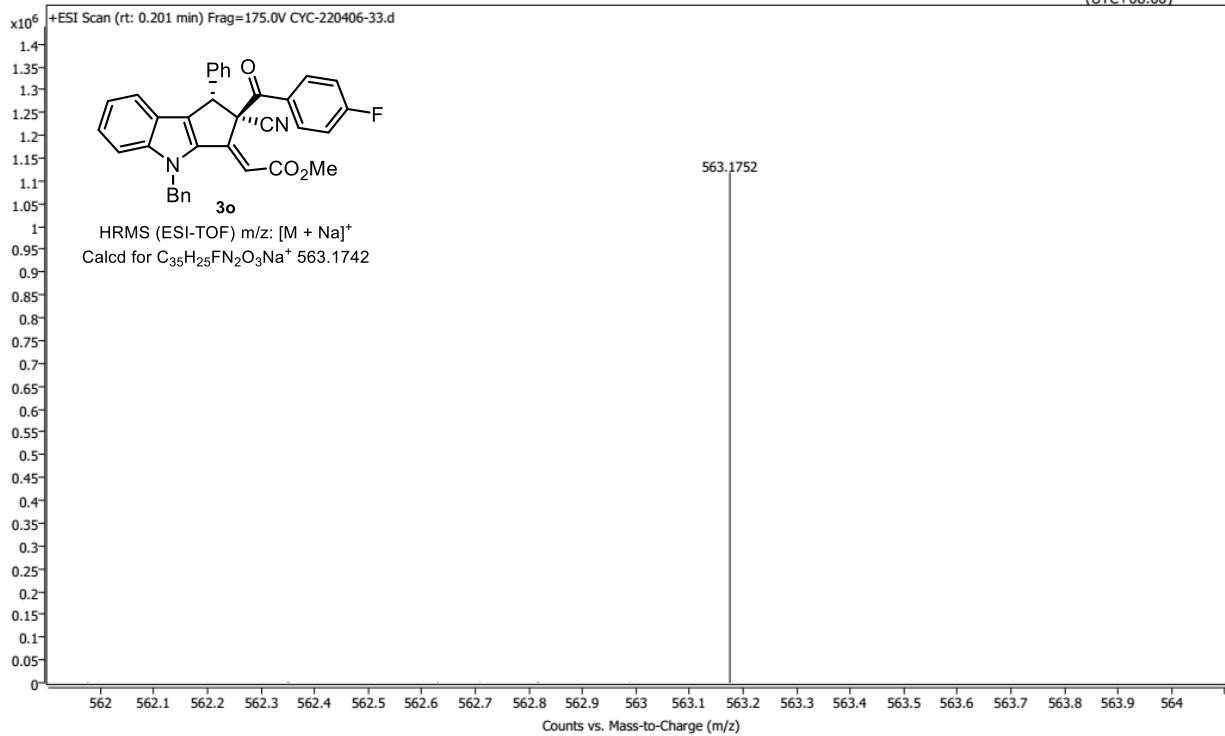

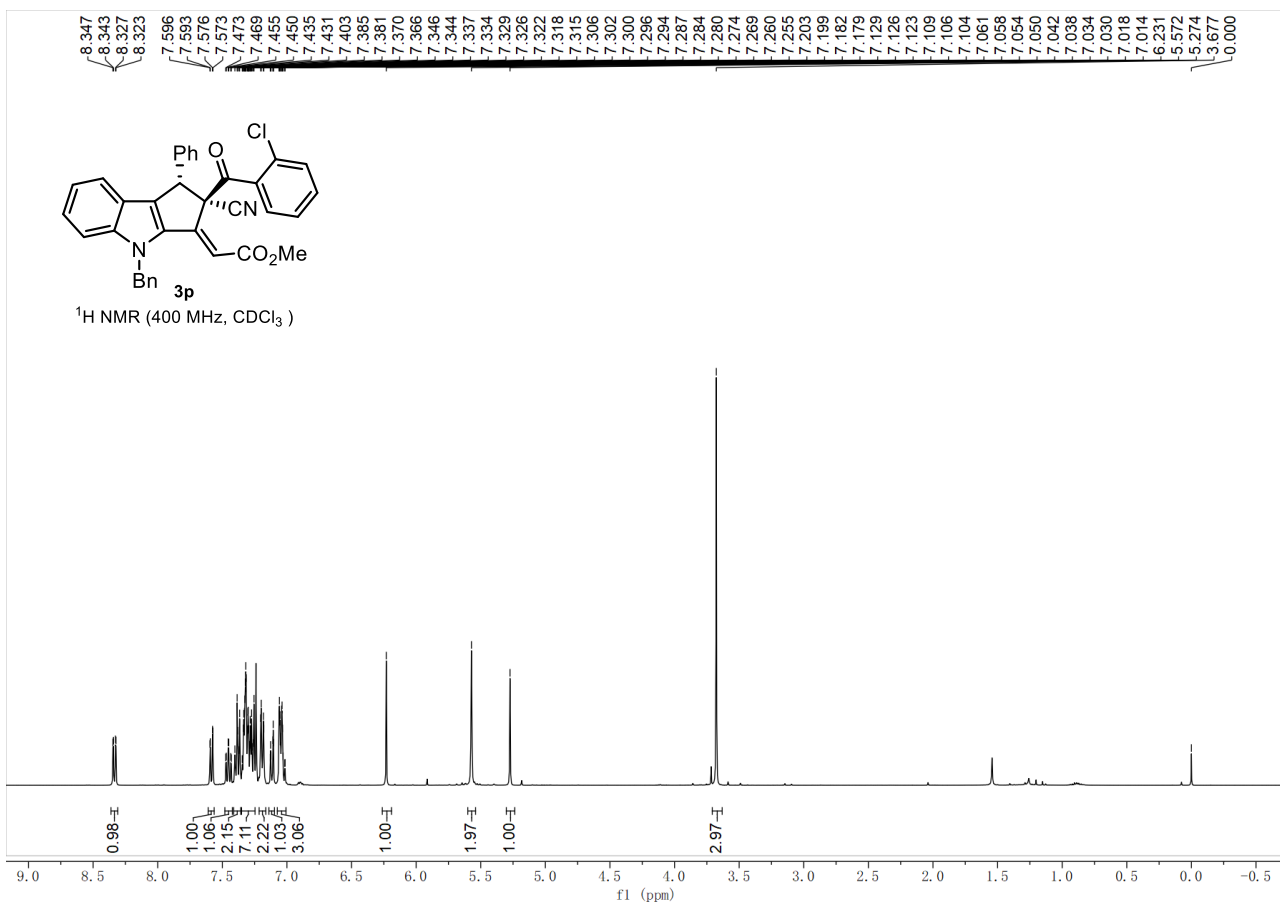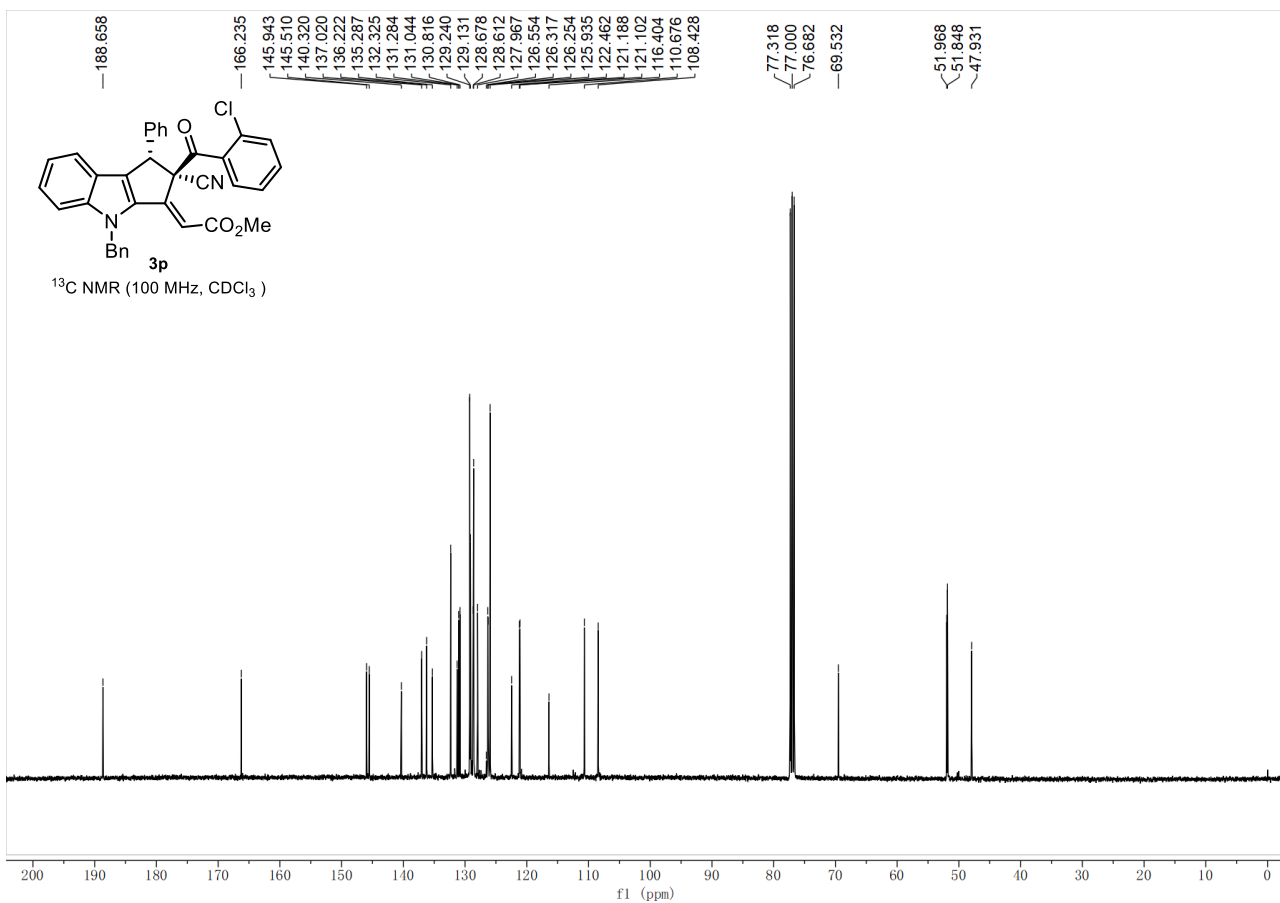

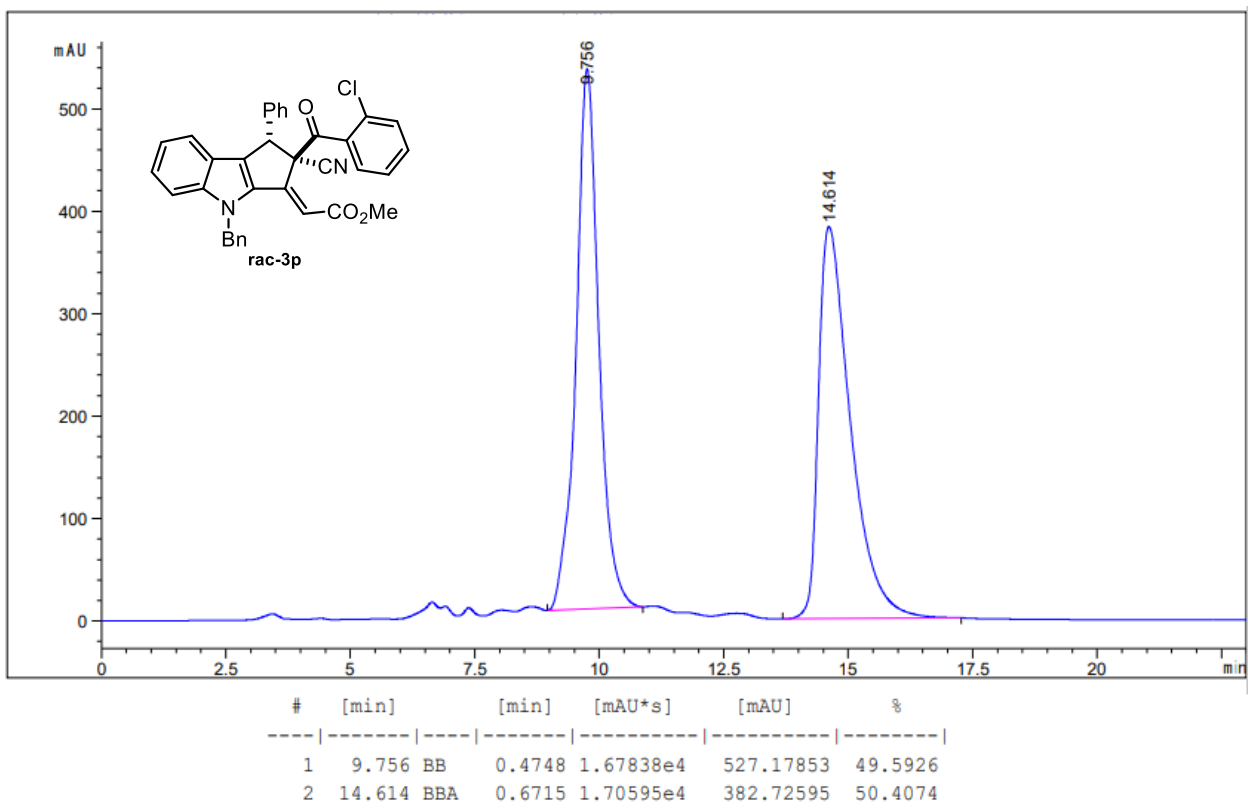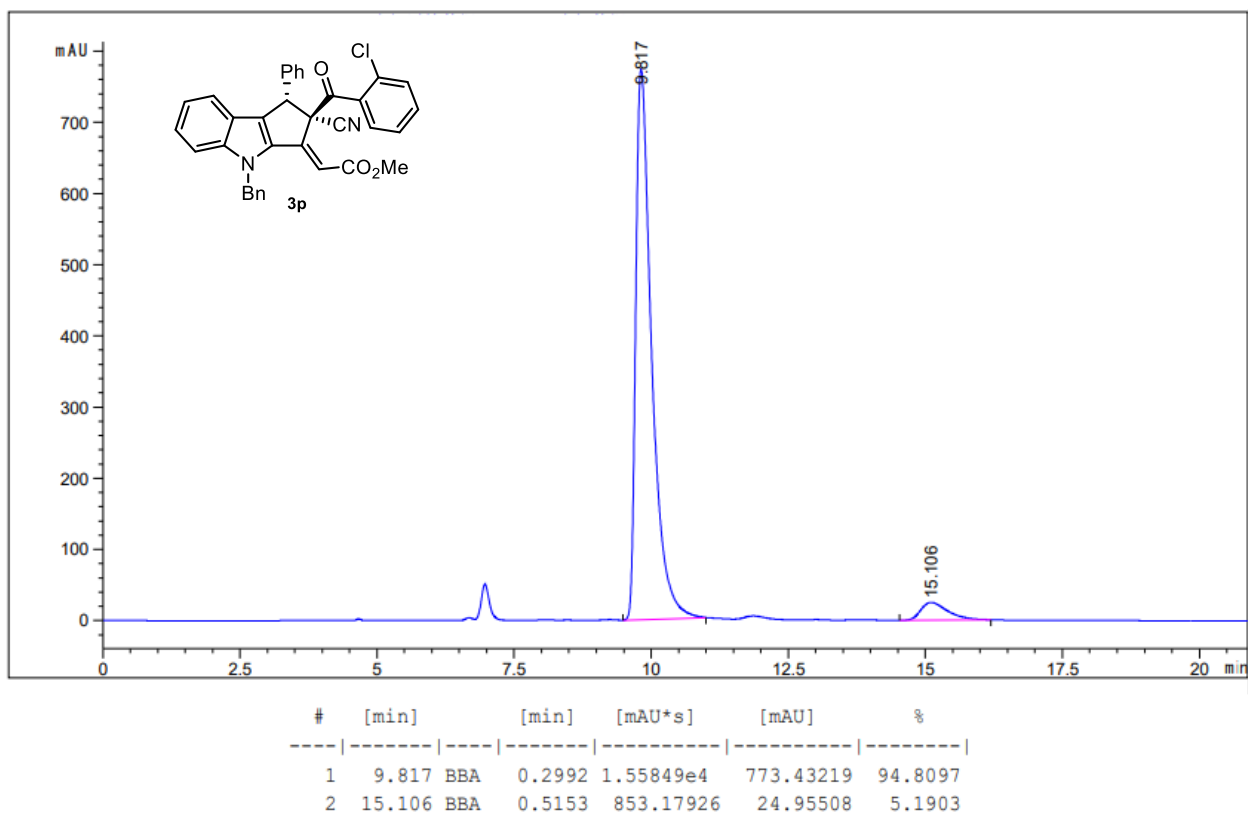

|                |                 |              |                |            |                  |                                                    |
|----------------|-----------------|--------------|----------------|------------|------------------|----------------------------------------------------|
| Name           | CYC-220406-46   | Rack Pos.    |                | Instrument | Instrument 1     | Operator                                           |
| Inj. Vol. (ul) | 8               | Plate Pos.   |                | IRM Status | Some ions missed |                                                    |
| Data File      | CYC-220406-46.d | Method (Acq) | ZYJ-20201106.m | Comment    |                  | Acq. Time (Local) 4/9/2022 11:18:52 AM (UTC+08:00) |

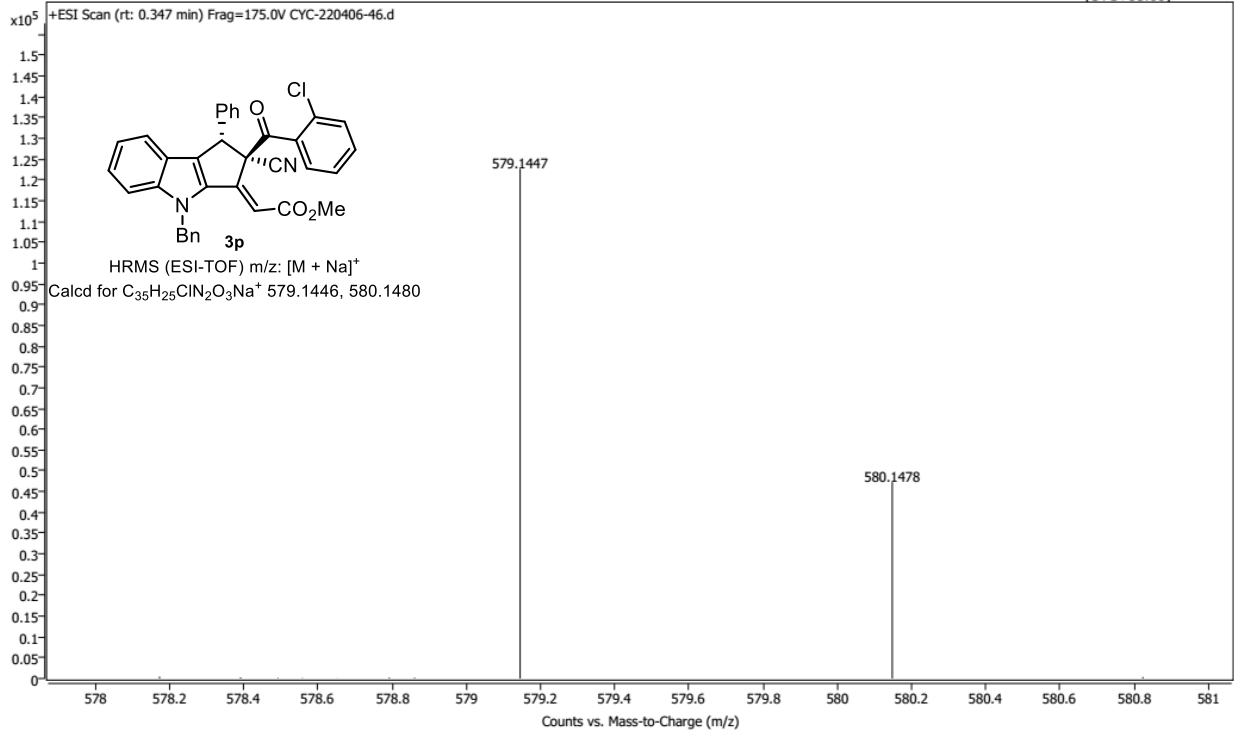

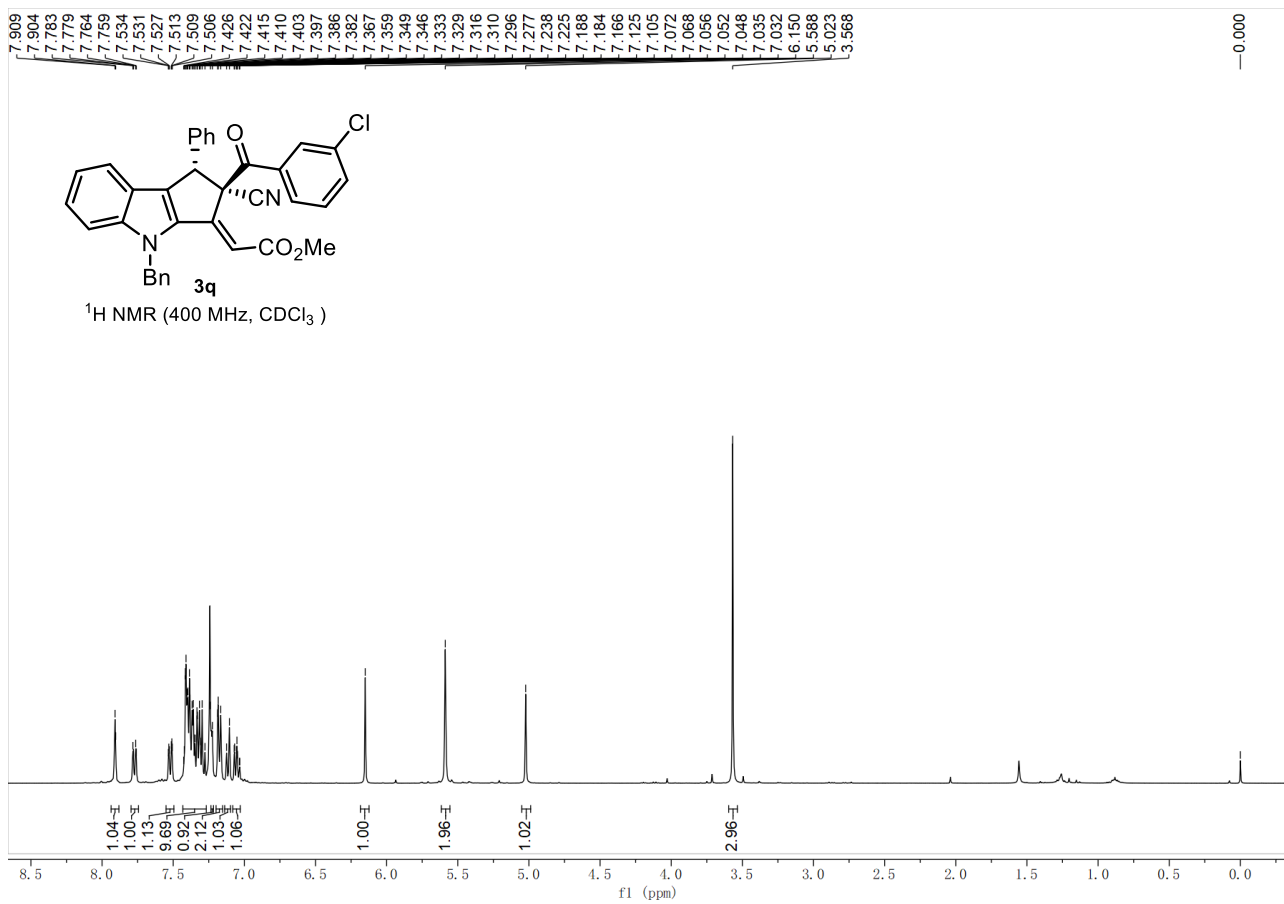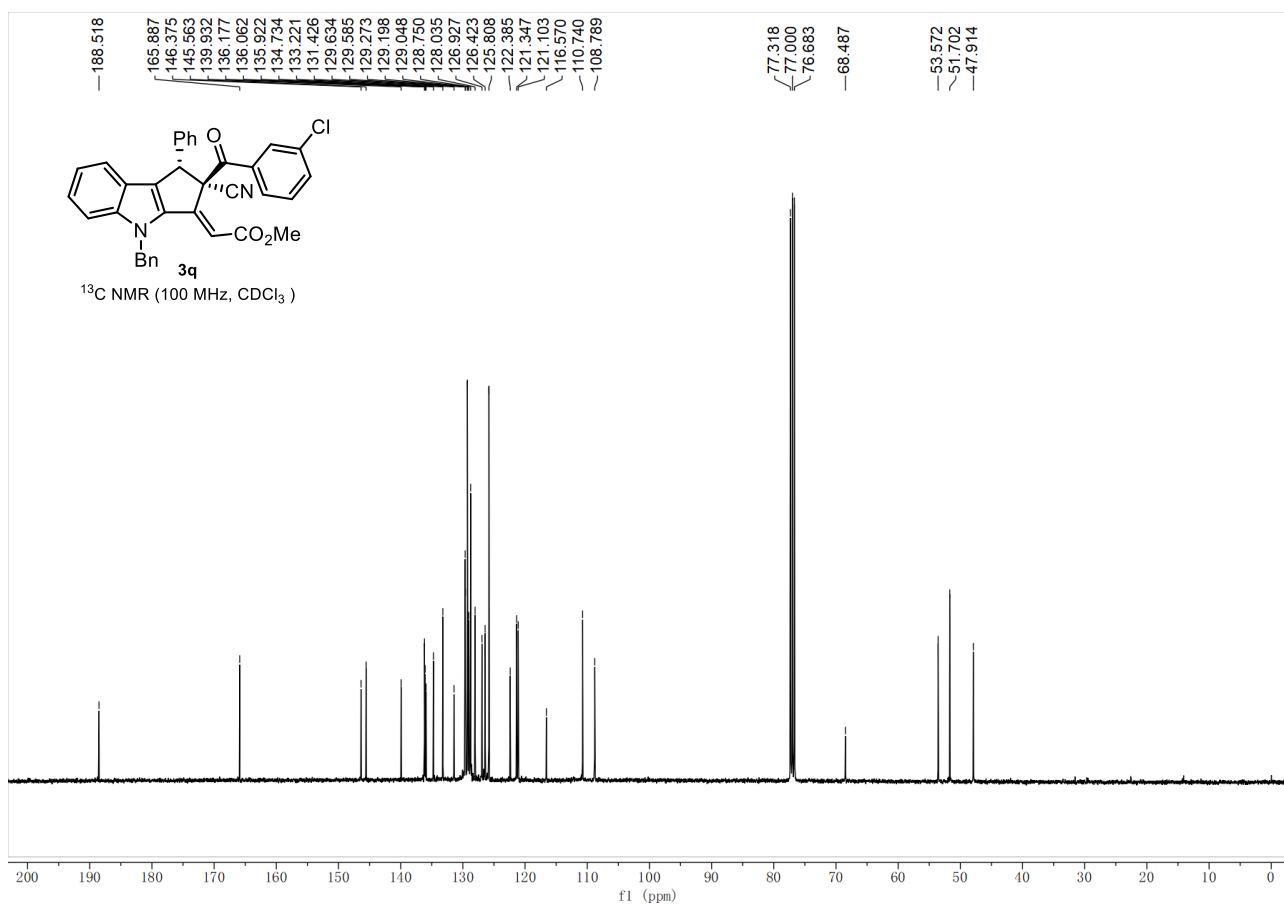

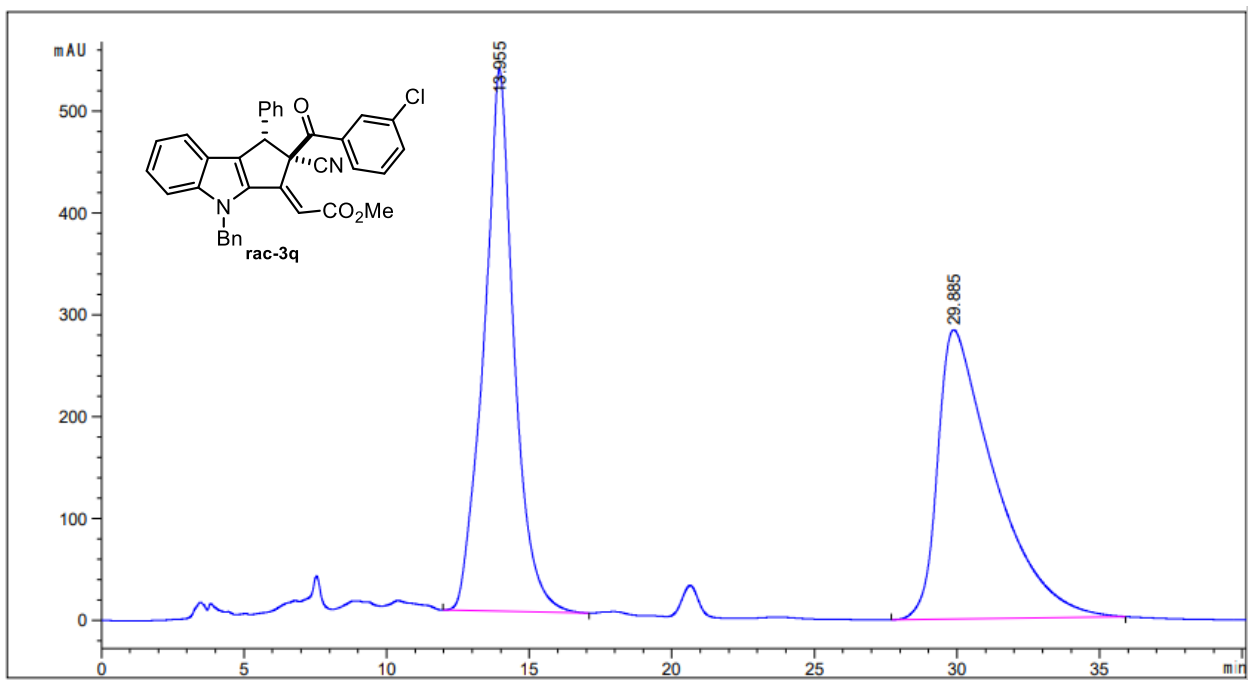

| # | [min]  | [min] | [mAU*s] | [mAU]     | %         |         |
|---|--------|-------|---------|-----------|-----------|---------|
| 1 | 13.955 | BBA   | 1.0123  | 3.91535e4 | 532.43646 | 49.8356 |
| 2 | 29.885 | BBA   | 1.9491  | 3.94118e4 | 283.82718 | 50.1644 |

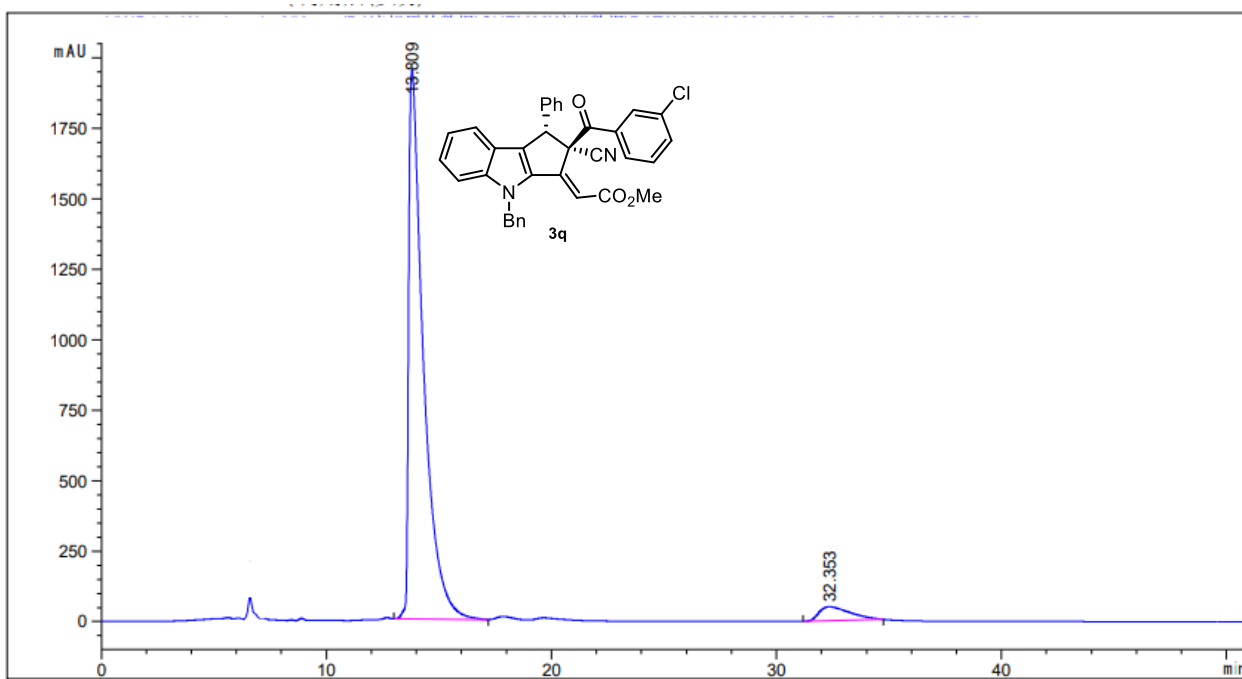

| # | [min]  | [min] | [mAU*s] | [mAU]      | %          |         |
|---|--------|-------|---------|------------|------------|---------|
| 1 | 13.809 | BB    | 0.6504  | 8.86727e4  | 1948.11304 | 94.9048 |
| 2 | 32.353 | BBA   | 1.4554  | 4760.59619 | 49.69775   | 5.0952  |

|                |                 |              |                |            |              |                                                    |
|----------------|-----------------|--------------|----------------|------------|--------------|----------------------------------------------------|
| Name           | CYC-220406-47   | Rack Pos.    |                | Instrument | Instrument 1 | Operator                                           |
| Inj. Vol. (ul) | 8               | Plate Pos.   |                | IRM Status | Success      |                                                    |
| Data File      | CYC-220406-47.d | Method (Acq) | ZYJ-20201106.m | Comment    |              | Acq. Time (Local) 4/9/2022 11:21:49 AM (UTC+08:00) |

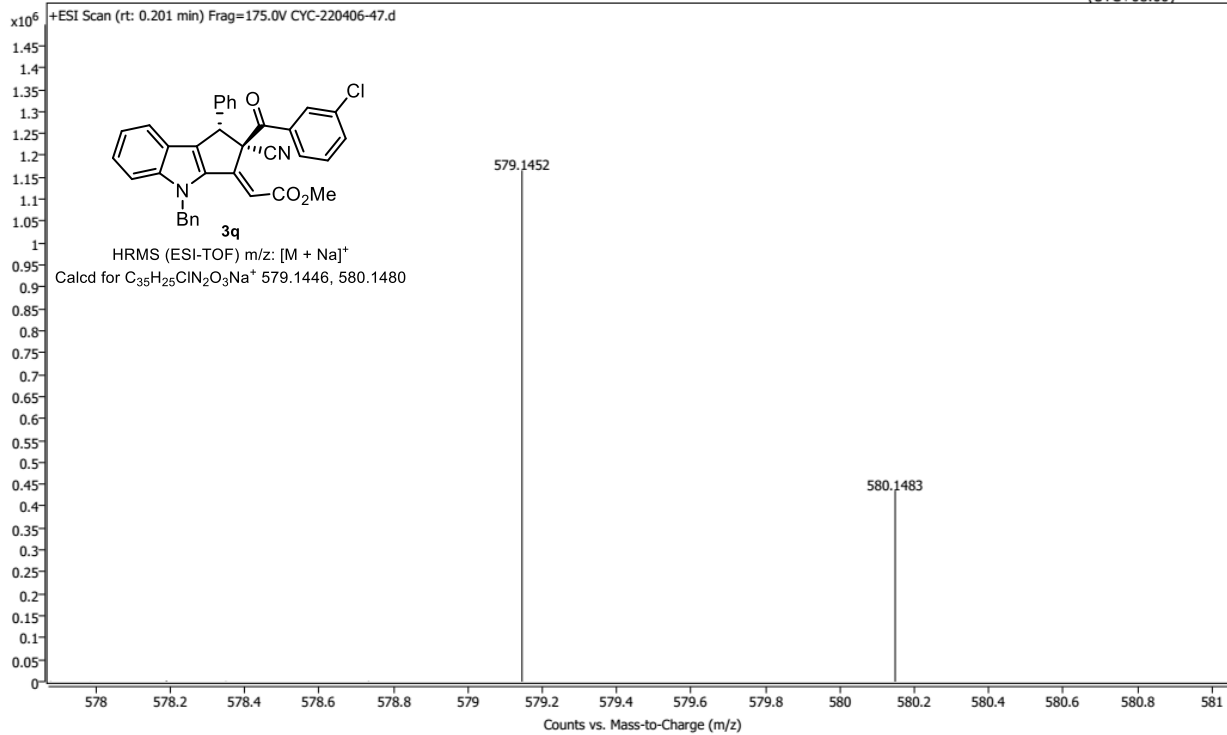

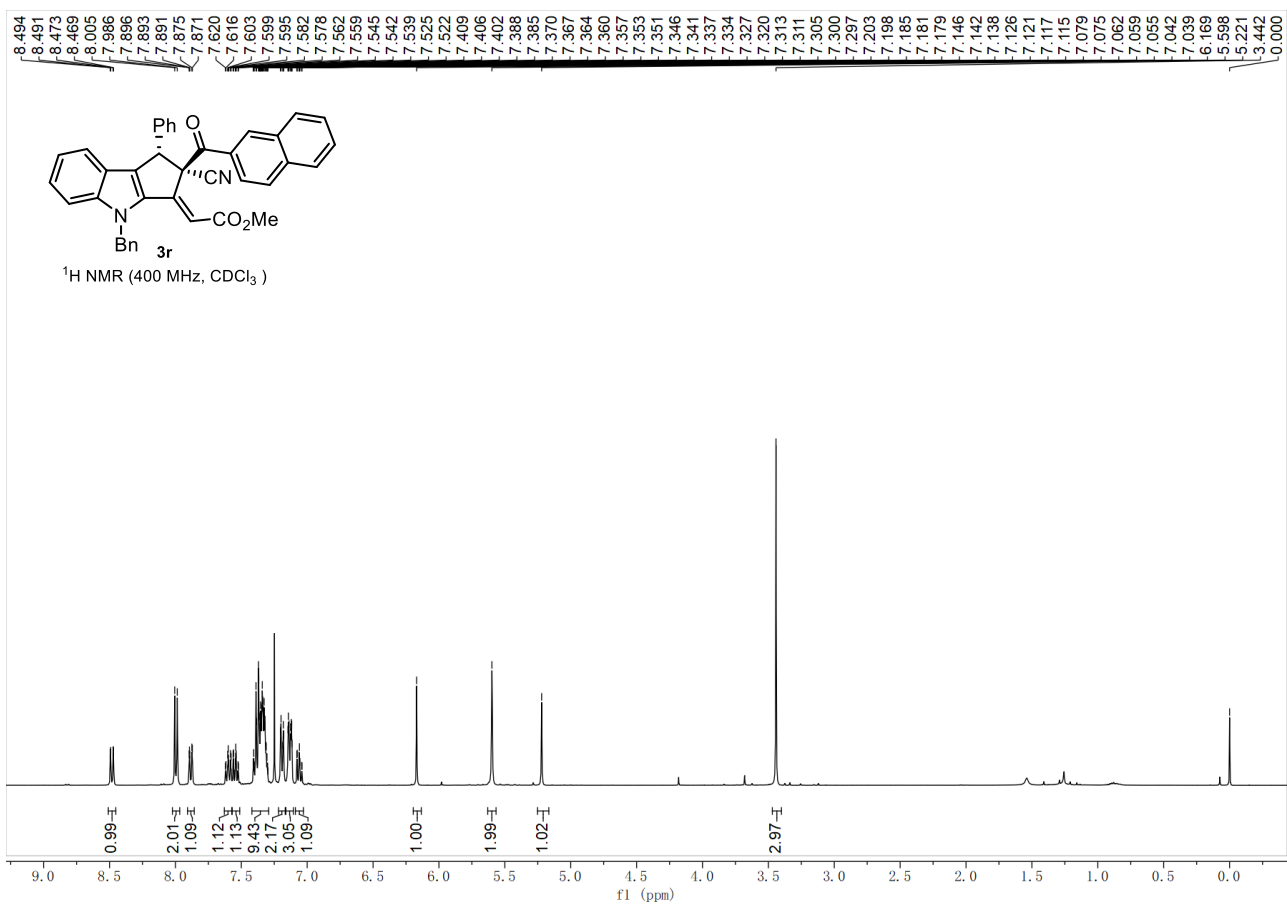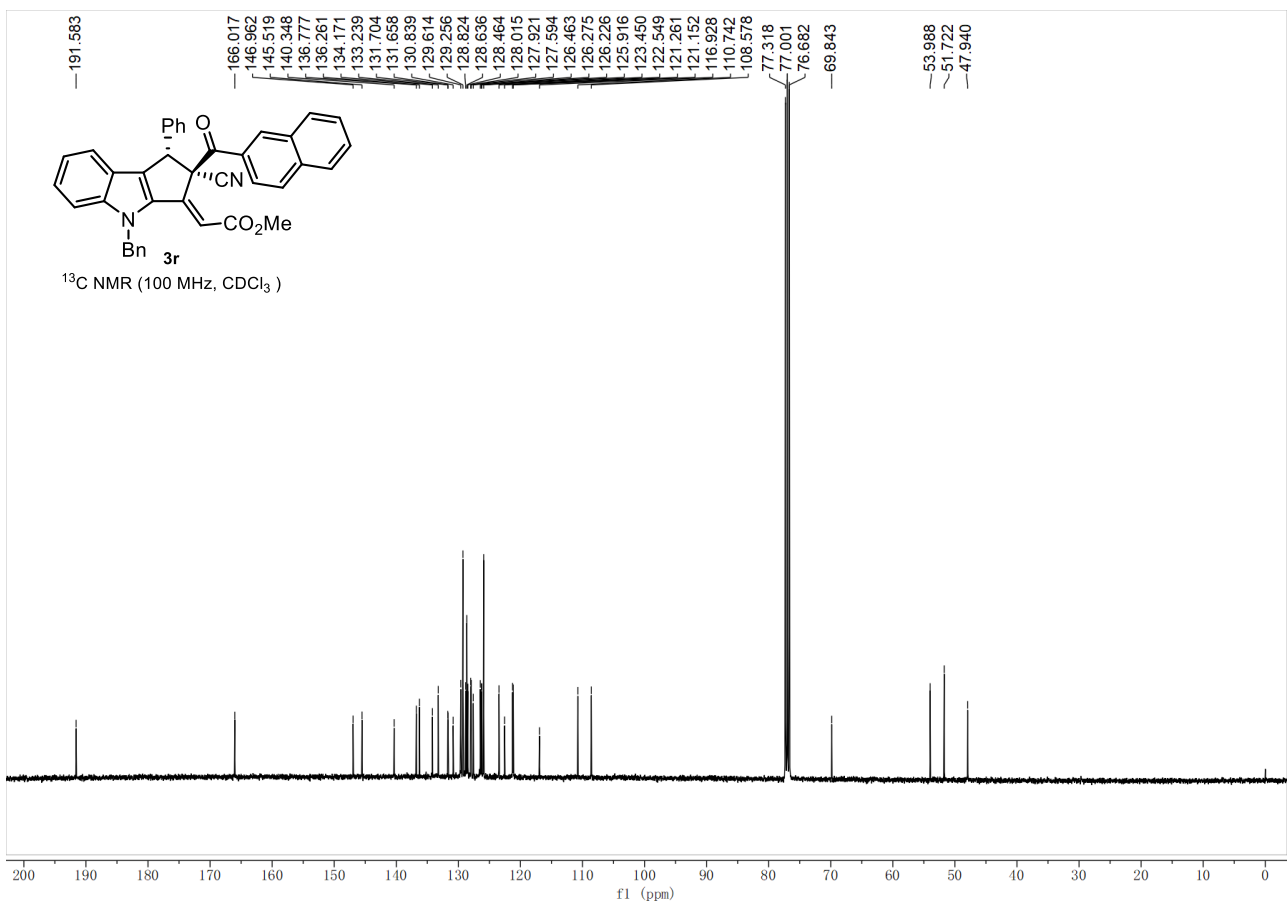



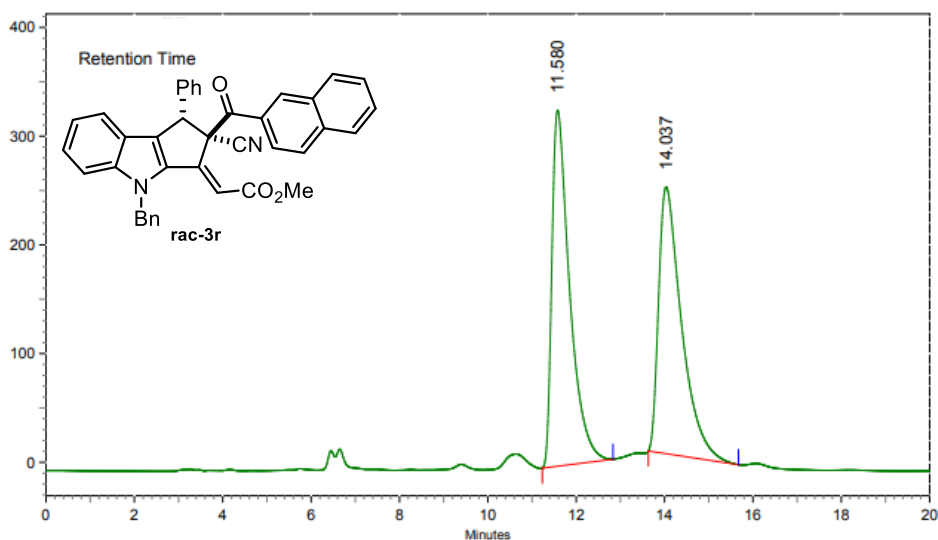

AREA PERCENT REPORT

| Peak No. | Ret Time | Width | Height  | Area      | Area [%] |
|----------|----------|-------|---------|-----------|----------|
| 1        | 11.580   | 1.600 | 5492989 | 153173798 | 50.8394  |
| 2        | 14.037   | 2.040 | 4120141 | 148115976 | 49.1606  |

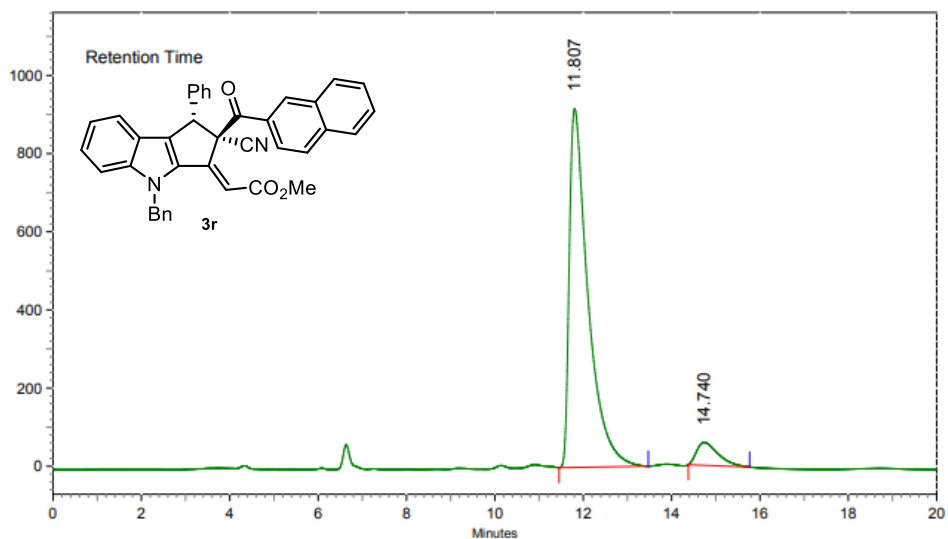

AREA PERCENT REPORT

| Peak No. | Ret Time | Width | Height   | Area      | Area [%] |
|----------|----------|-------|----------|-----------|----------|
| 1        | 11.807   | 2.020 | 15395999 | 452310860 | 93.1072  |
| 2        | 14.740   | 1.387 | 985064   | 33484779  | 6.8928   |

|                |                 |              |                |                  |                                                    |
|----------------|-----------------|--------------|----------------|------------------|----------------------------------------------------|
| Name           | CYC-220406-34   | Rack Pos.    | Instrument     | Instrument 1     | Operator                                           |
| Inj. Vol. (ul) | 8               | Plate Pos.   | IRM Status     | Some ions missed |                                                    |
| Data File      | CYC-220406-34.d | Method (Acq) | ZYJ-20201106.m | Comment          | Acq. Time (Local) 4/9/2022 10:14:24 AM (UTC+08:00) |

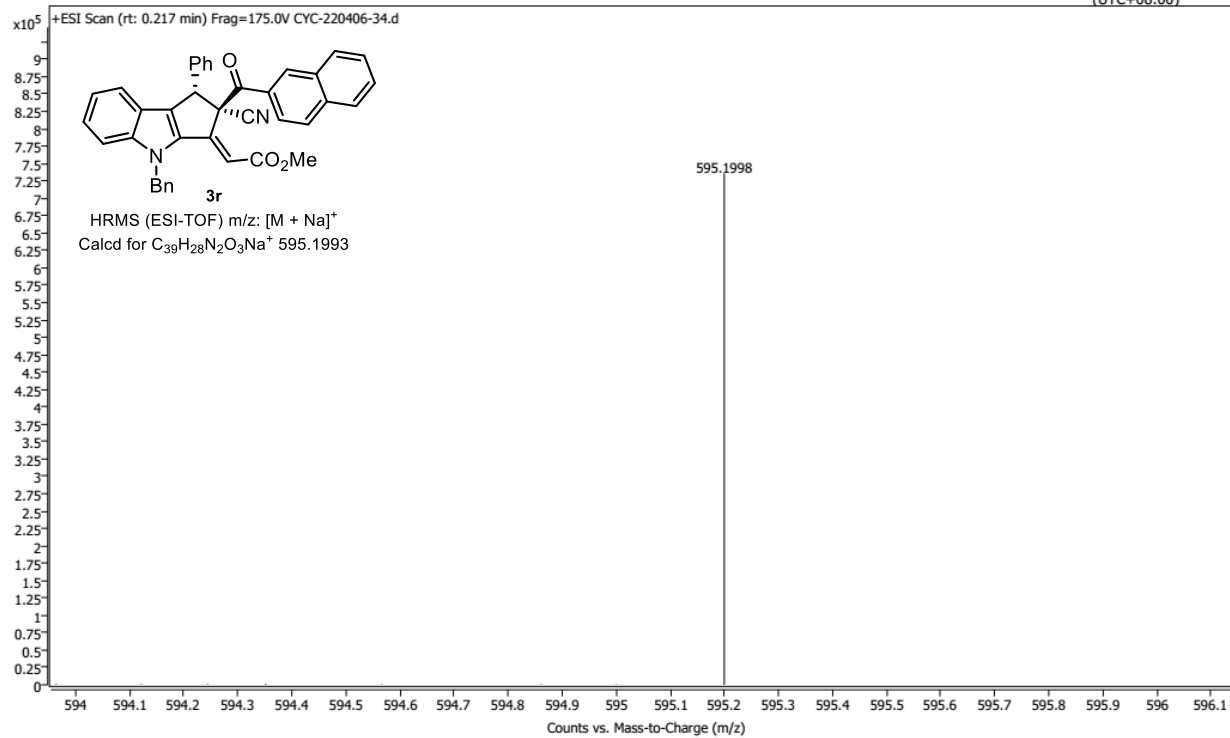

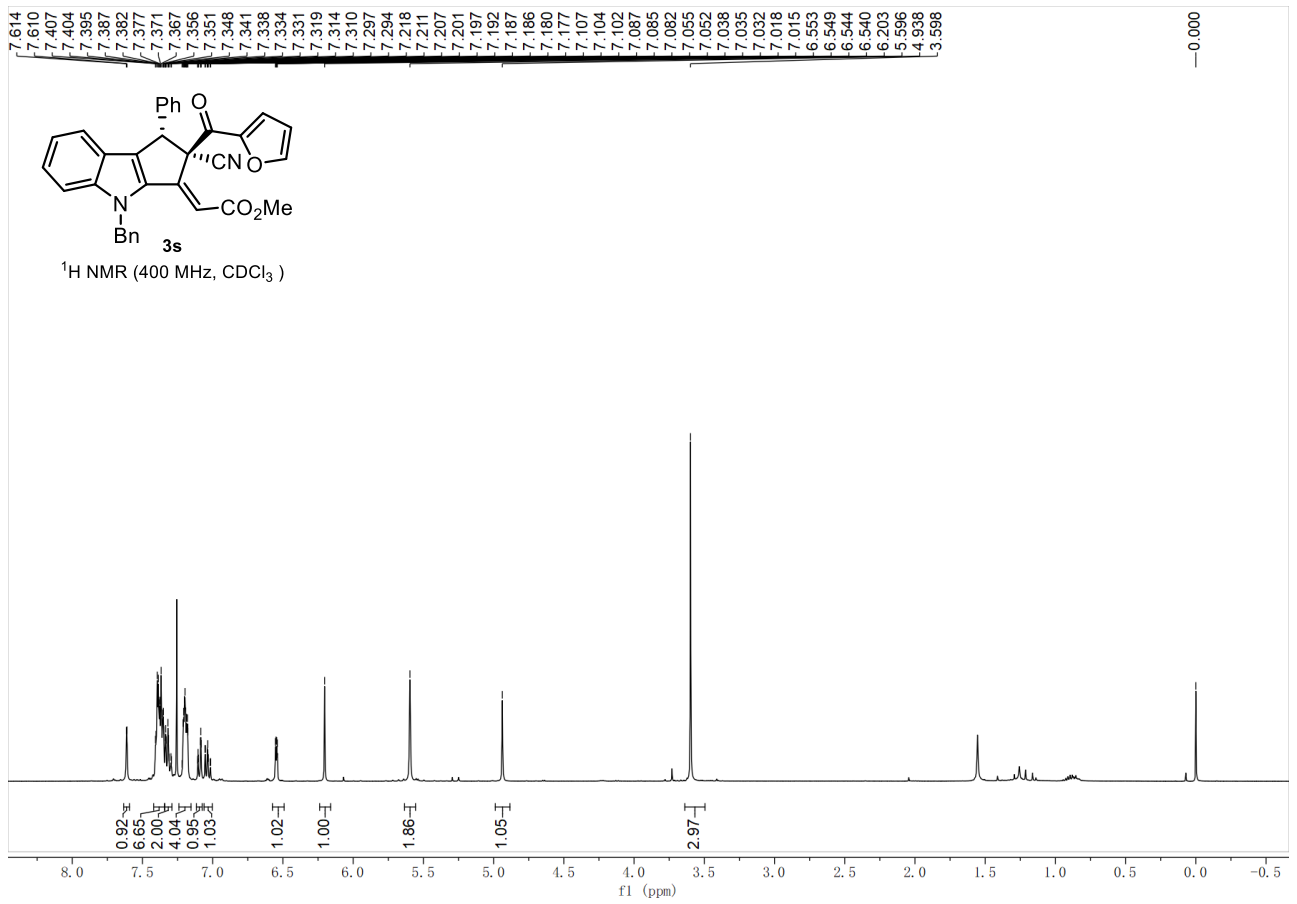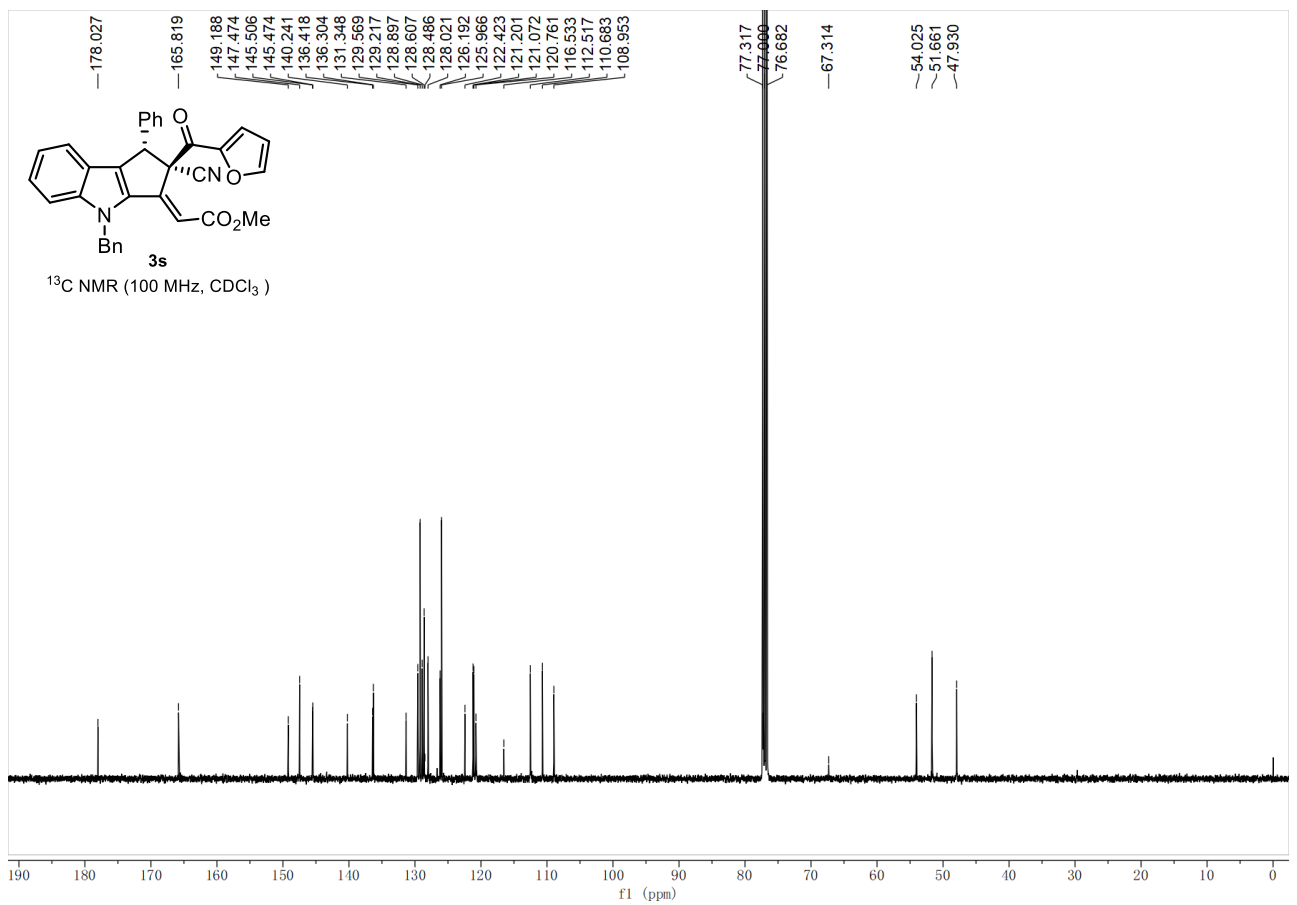

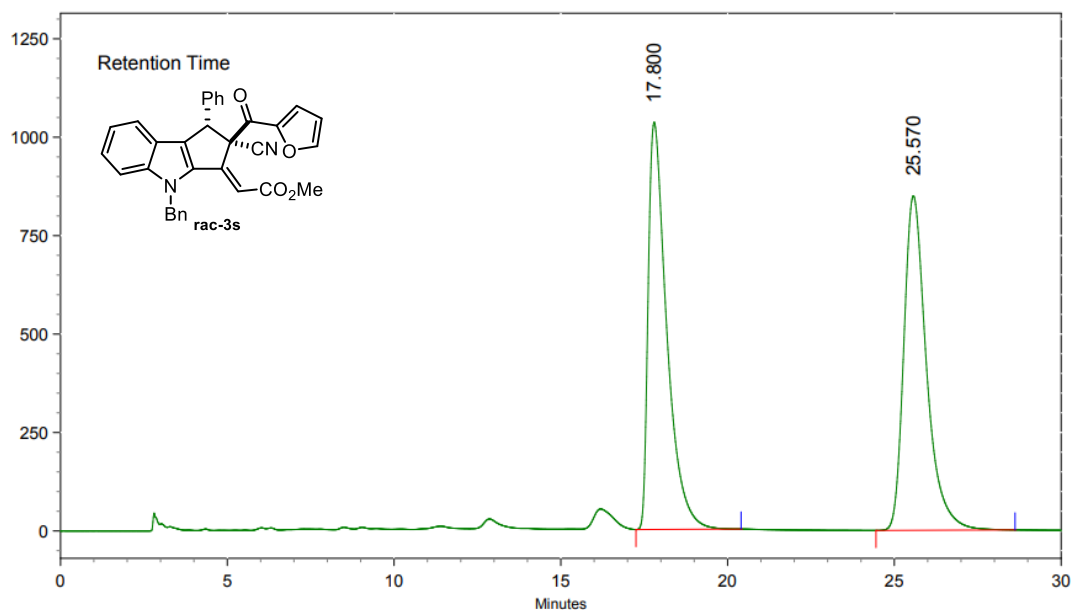

### AREA PERCENT REPORT

| Peak No. | Ret Time | Width | Height   | Area      | Area [%] |
|----------|----------|-------|----------|-----------|----------|
| 1        | 17.800   | 3.153 | 17351435 | 670966566 | 49.9116  |
| 2        | 25.570   | 4.170 | 14252623 | 673342811 | 50.0884  |

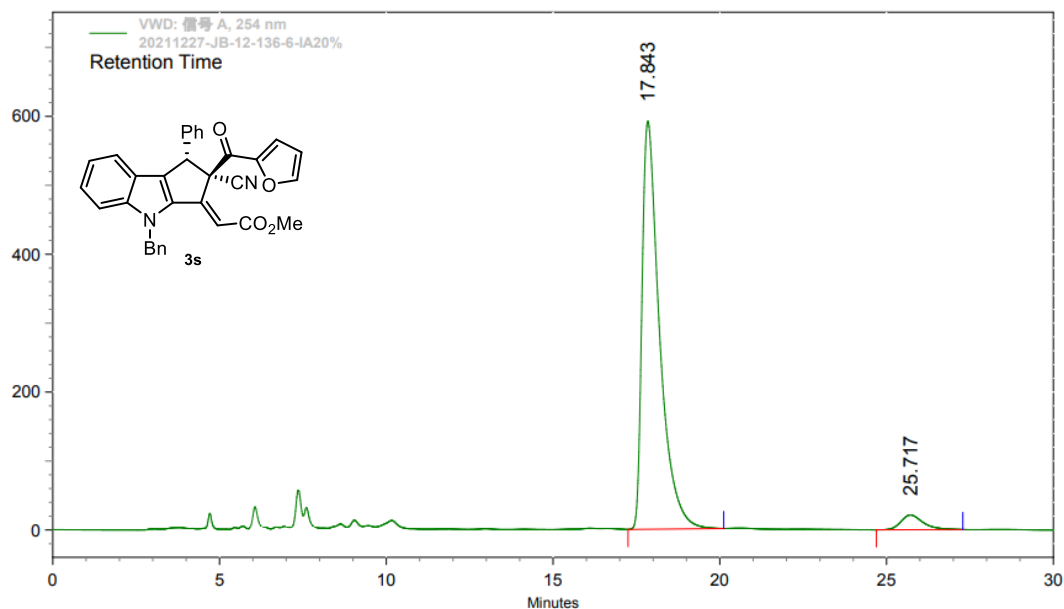

### AREA PERCENT REPORT

| Peak No. | Ret Time | Width | Height  | Area      | Area [%] |
|----------|----------|-------|---------|-----------|----------|
| 1        | 17.843   | 2.867 | 9932096 | 362098755 | 95.6293  |
| 2        | 25.717   | 2.590 | 357222  | 16549756  | 4.3707   |

|                |                 |              |                |            |              |                   |                                  |
|----------------|-----------------|--------------|----------------|------------|--------------|-------------------|----------------------------------|
| Name           | CYC-220406-35   | Rack Pos.    |                | Instrument | Instrument 1 | Operator          |                                  |
| Inj. Vol. (ul) | 8               | Plate Pos.   |                | IRM Status | Success      |                   |                                  |
| Data File      | CYC-220406-35.d | Method (Acq) | ZYJ-20201106.m | Comment    |              | Acq. Time (Local) | 4/9/2022 10:17:22 AM (UTC+08:00) |

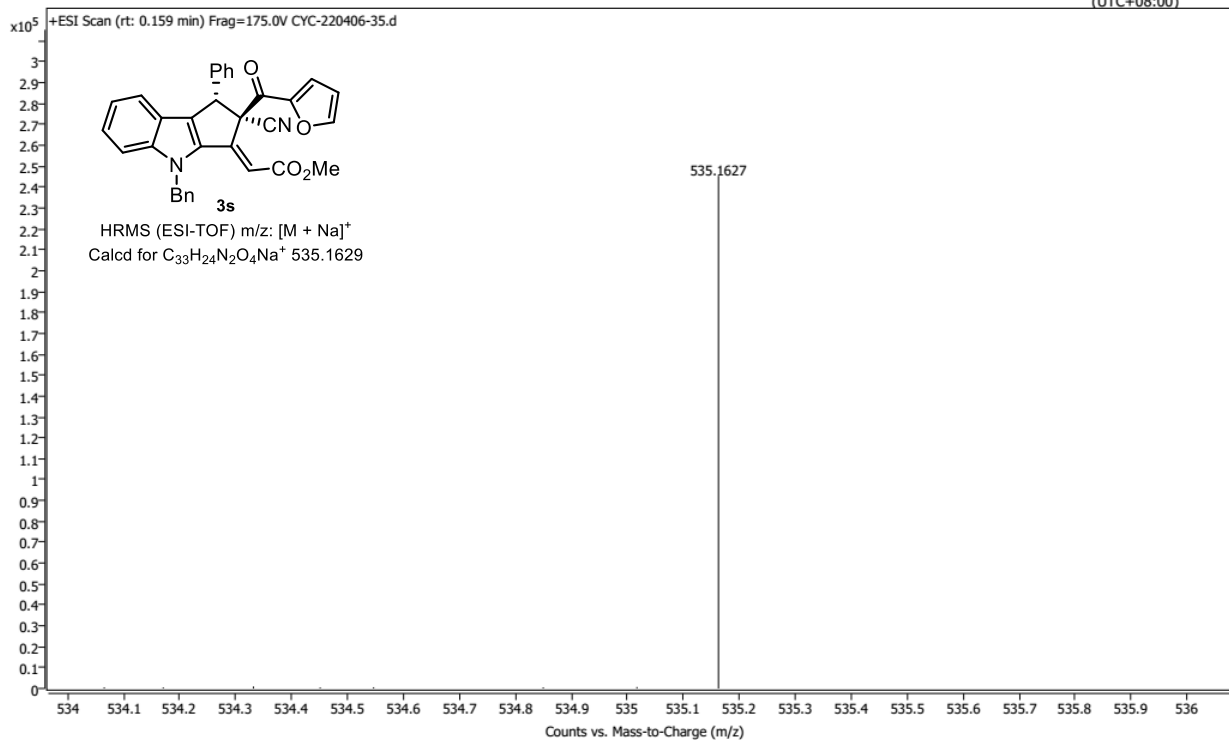

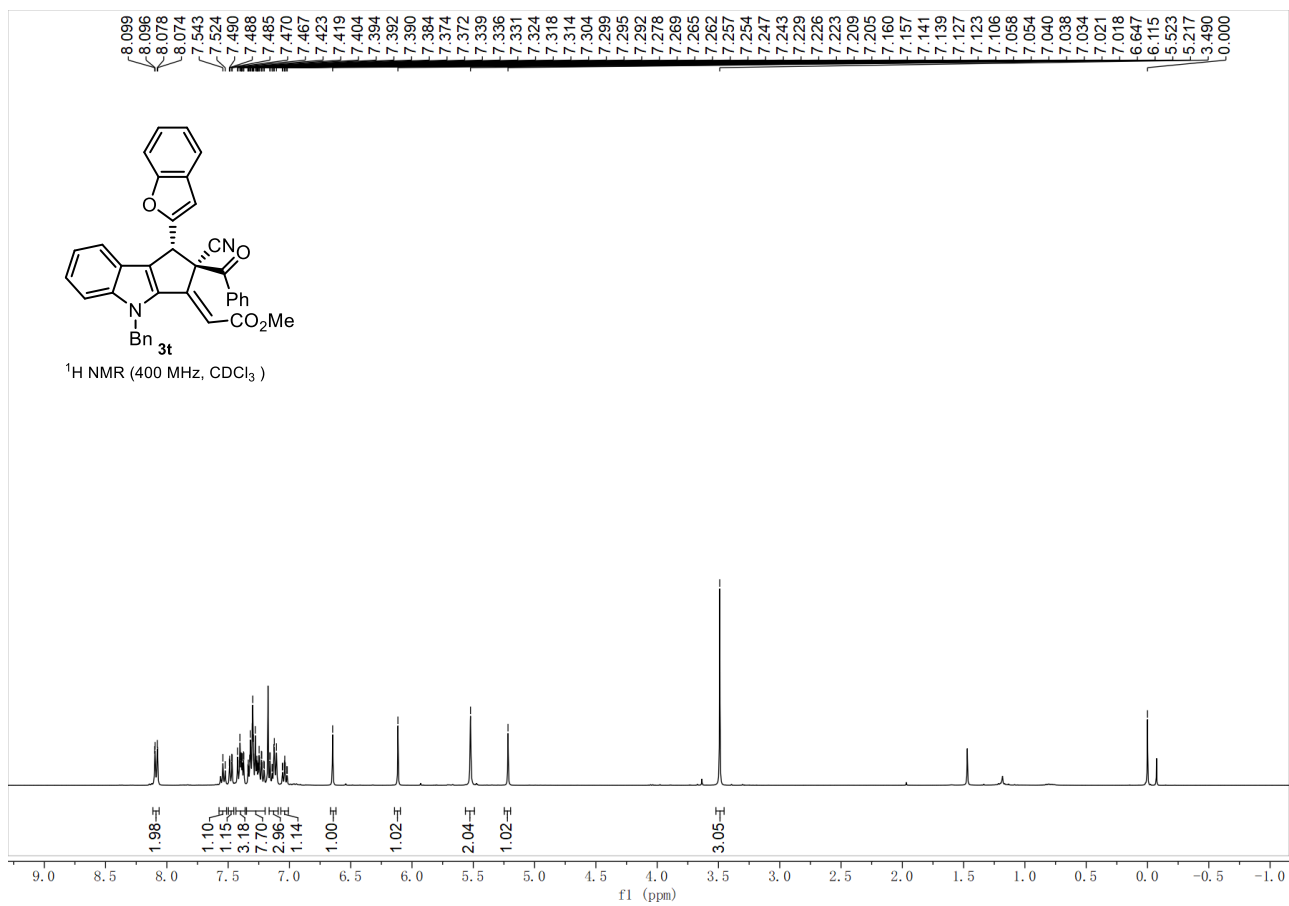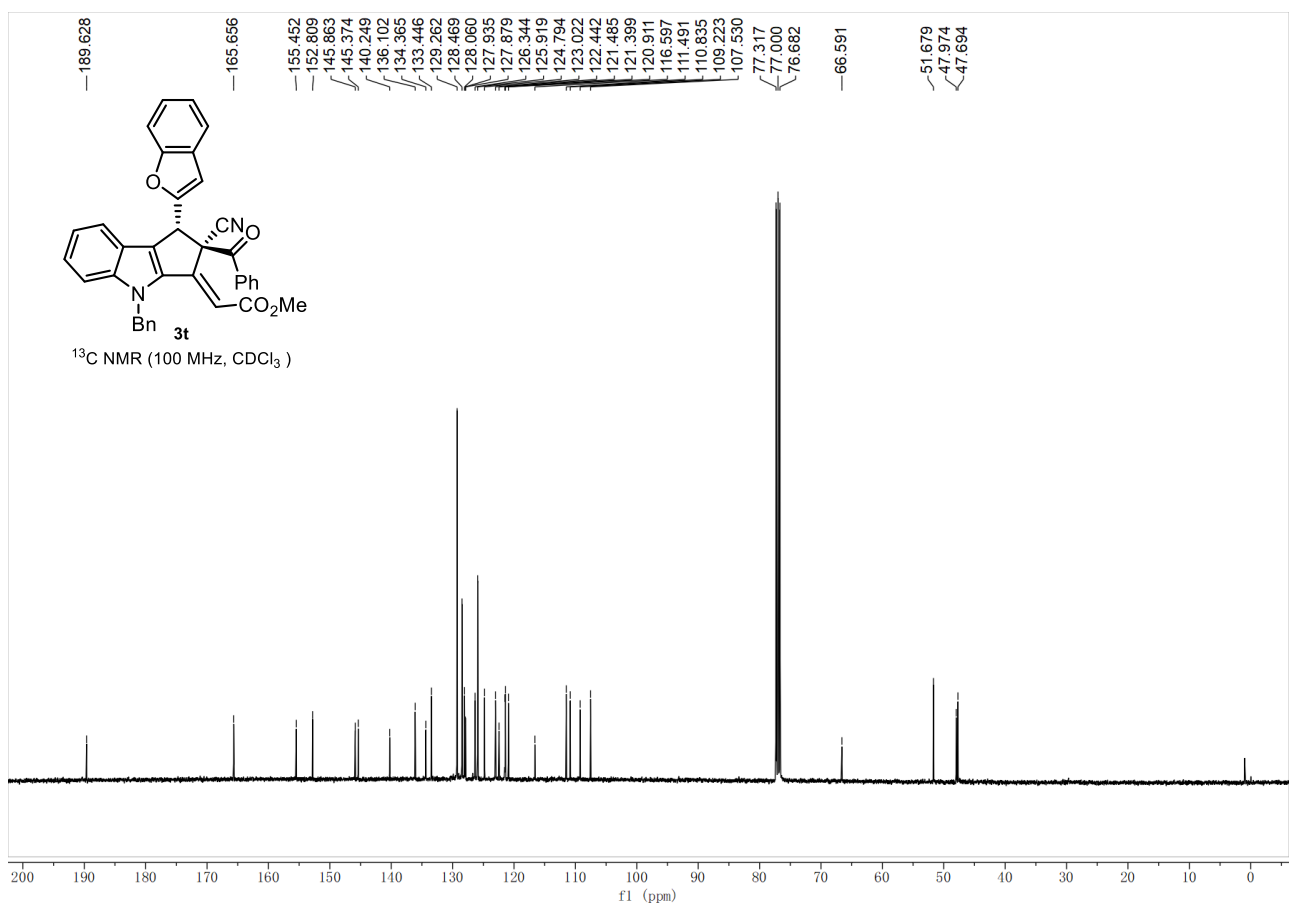

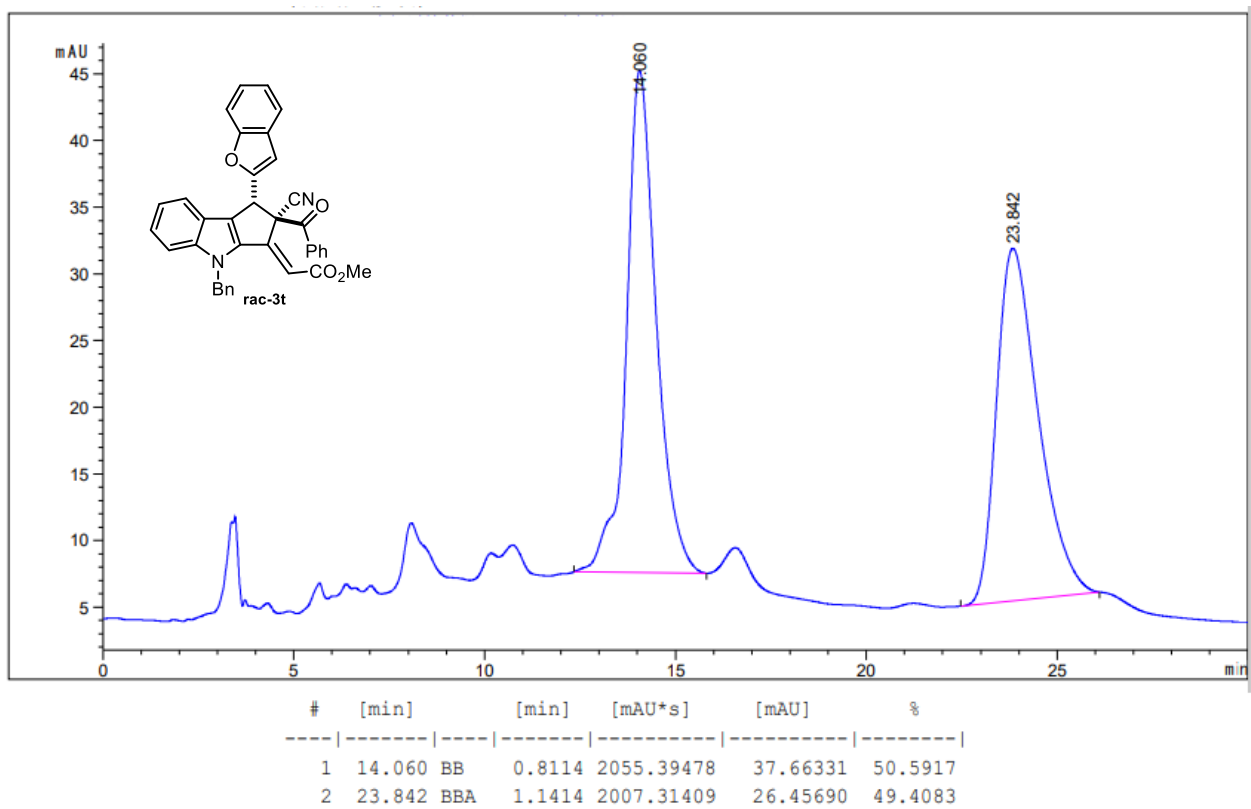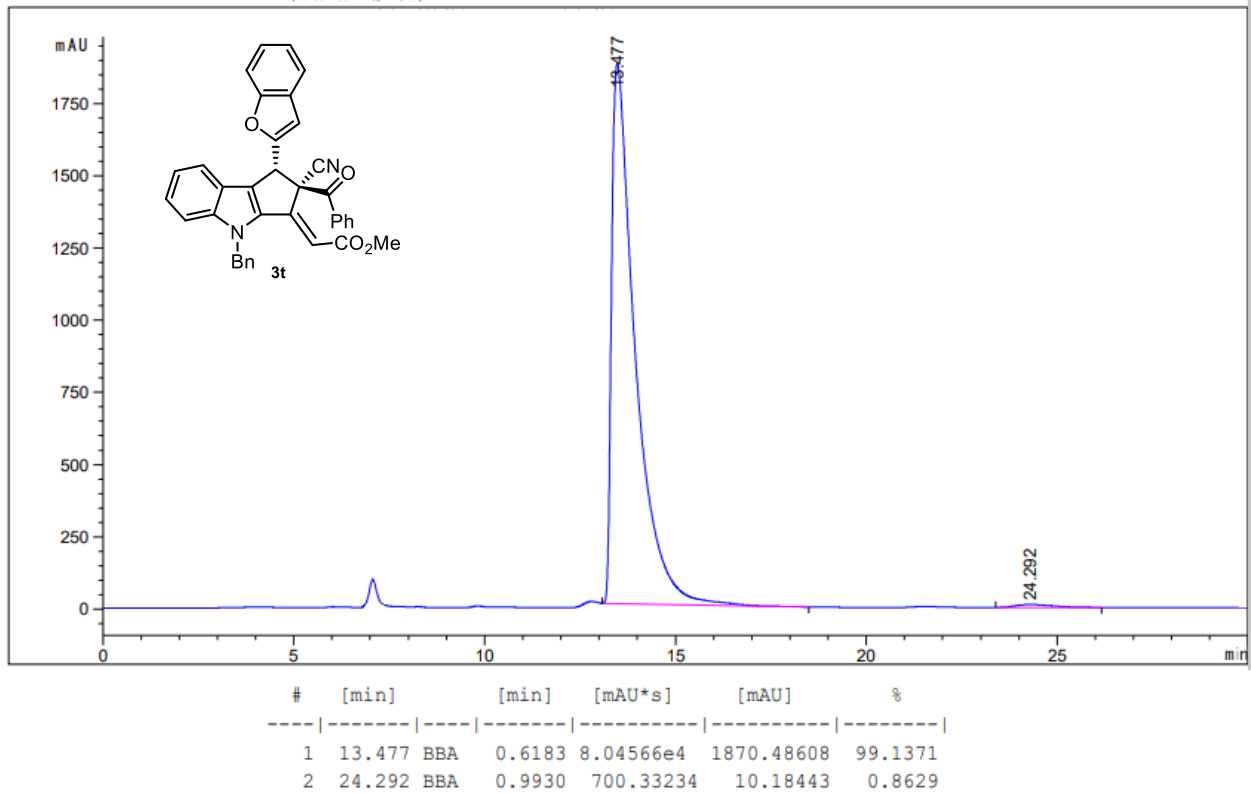

| Name           | CYC-220406-39   | Rack Pos.    | Instrument     | Instrument 1 | Operator                                           |
|----------------|-----------------|--------------|----------------|--------------|----------------------------------------------------|
| Inj. Vol. (ul) | 8               | Plate Pos.   | IRM Status     | Success      |                                                    |
| Data File      | CYC-220406-39.d | Method (Acq) | ZYJ-20201106.m | Comment      | Acq. Time (Local) 4/9/2022 10:58:13 AM (UTC+08:00) |

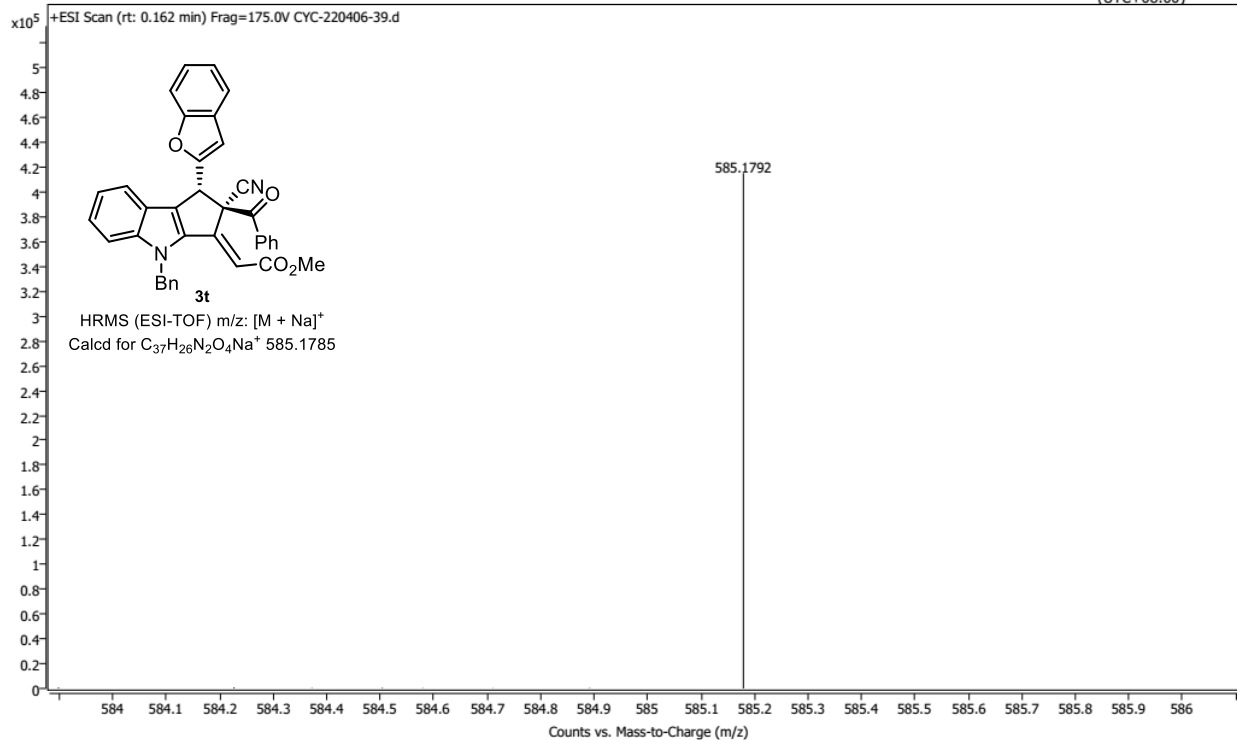



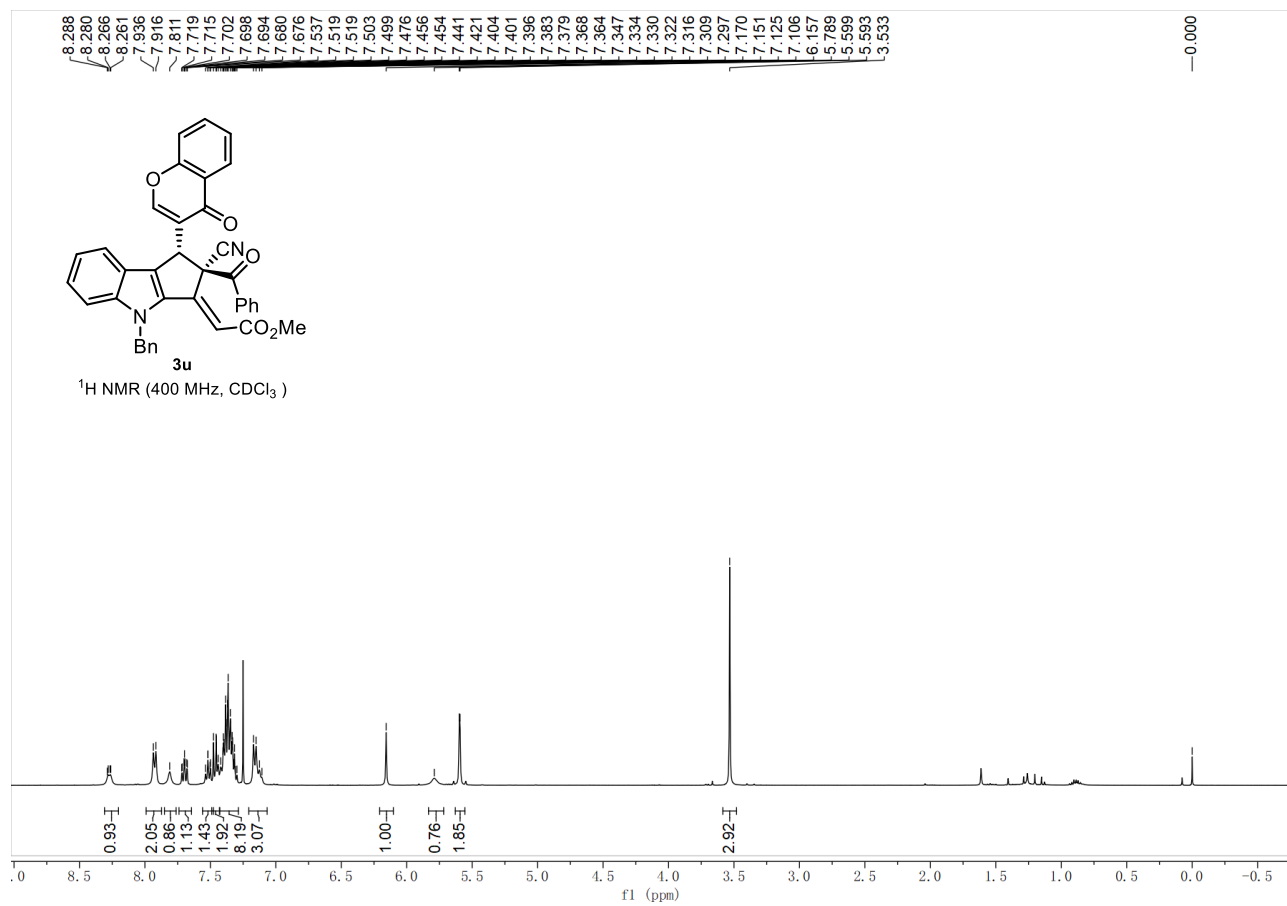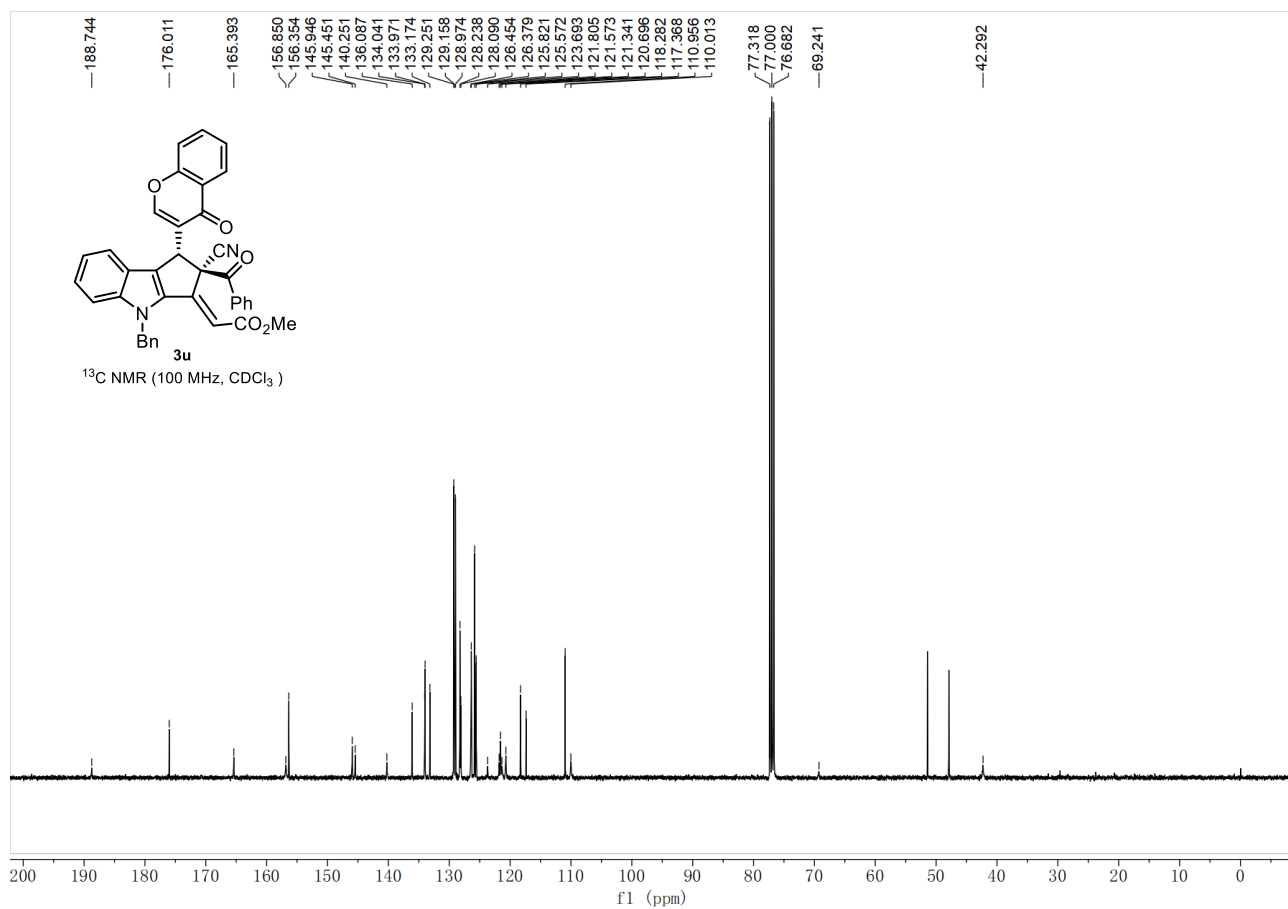

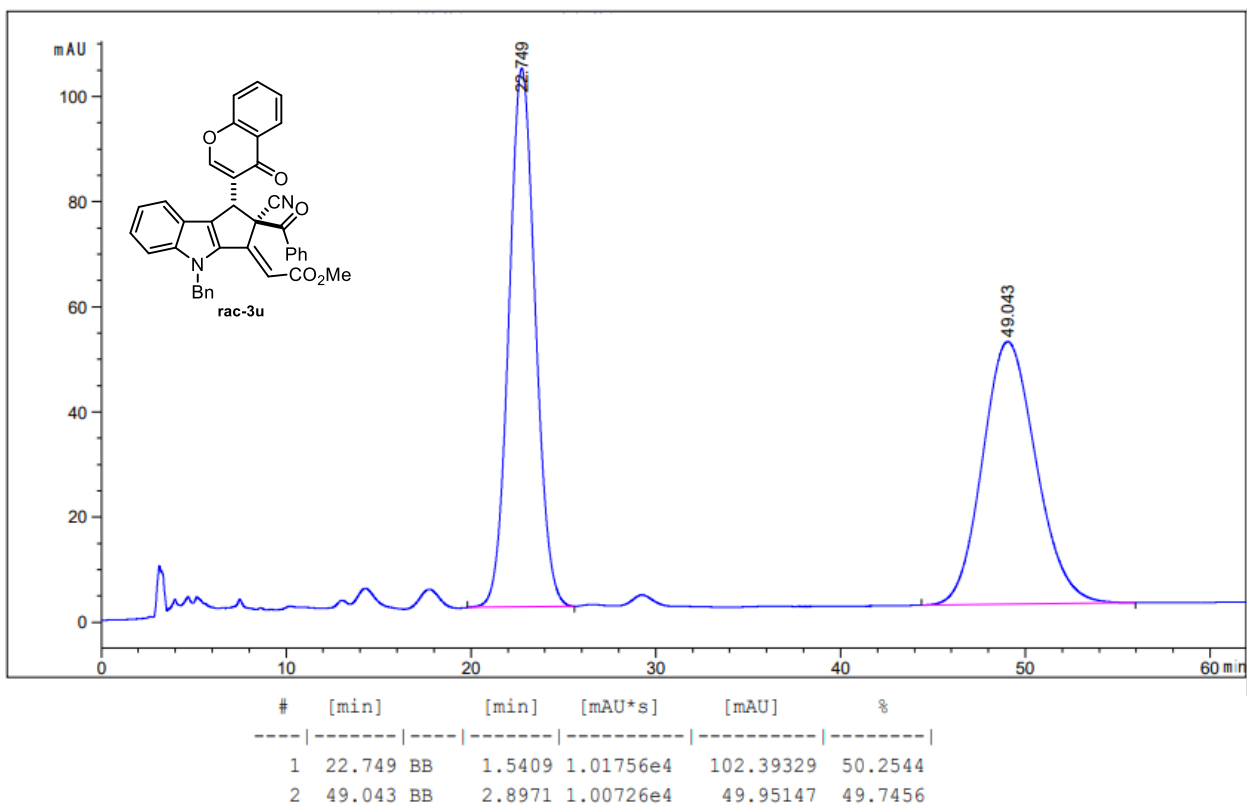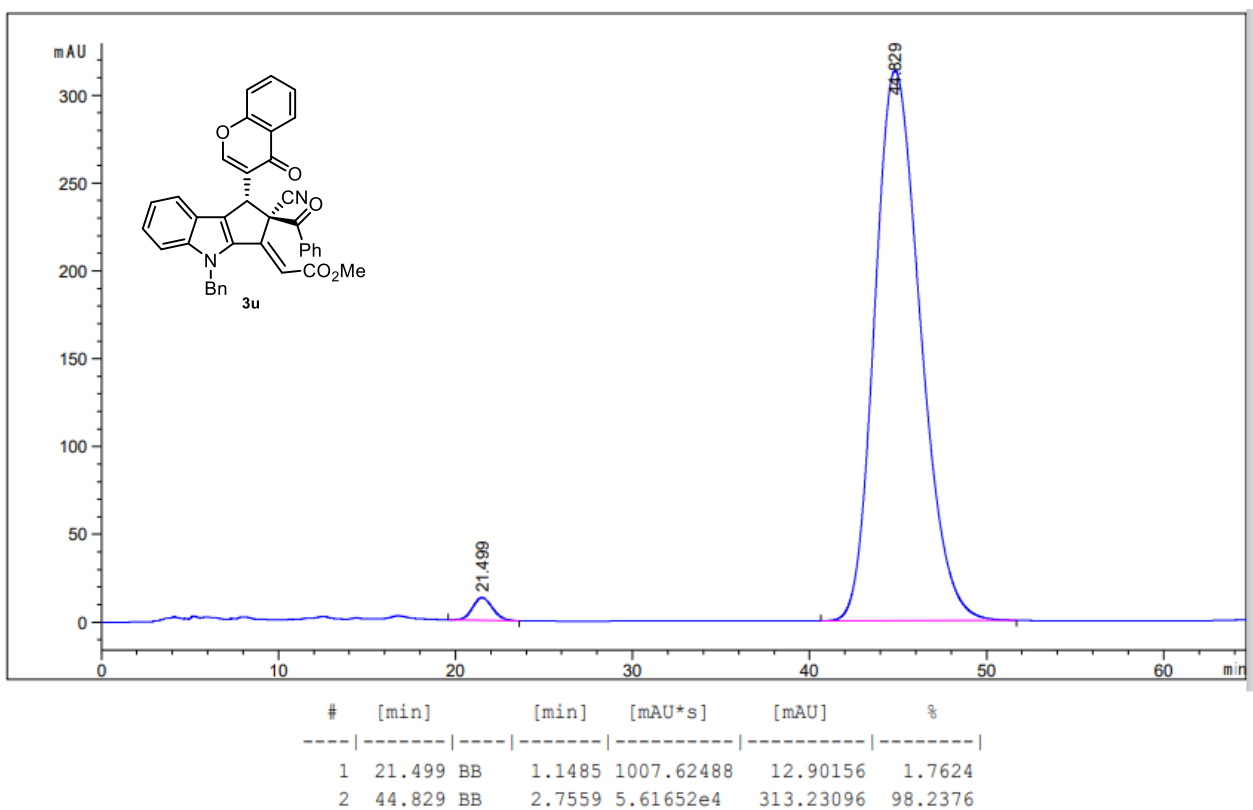

|                |                 |              |                |            |              |                   |                                  |
|----------------|-----------------|--------------|----------------|------------|--------------|-------------------|----------------------------------|
| Name           | CYC-220406-41   | Rack Pos.    |                | Instrument | Instrument 1 | Operator          |                                  |
| Inj. Vol. (ul) | 8               | Plate Pos.   |                | IRM Status | Success      |                   |                                  |
| Data File      | CYC-220406-41.d | Method (Acq) | ZYJ-20201106.m | Comment    |              | Acq. Time (Local) | 4/9/2022 11:04:07 AM (UTC+08:00) |

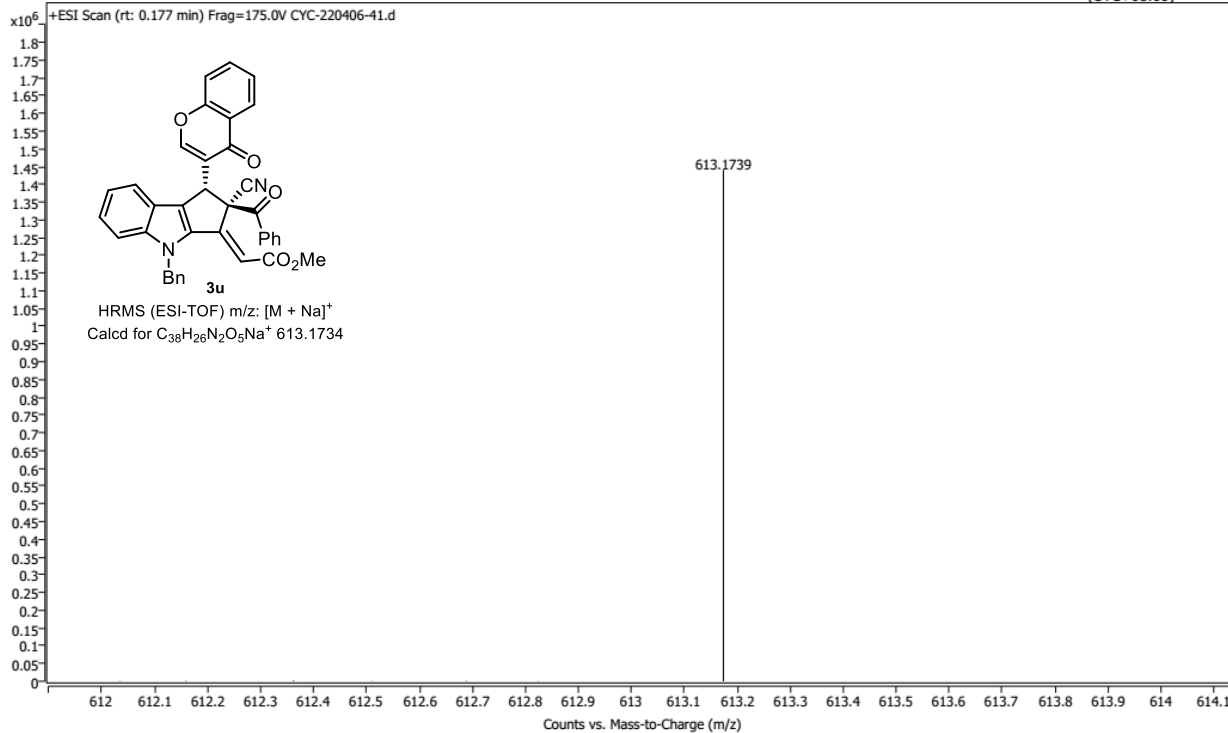

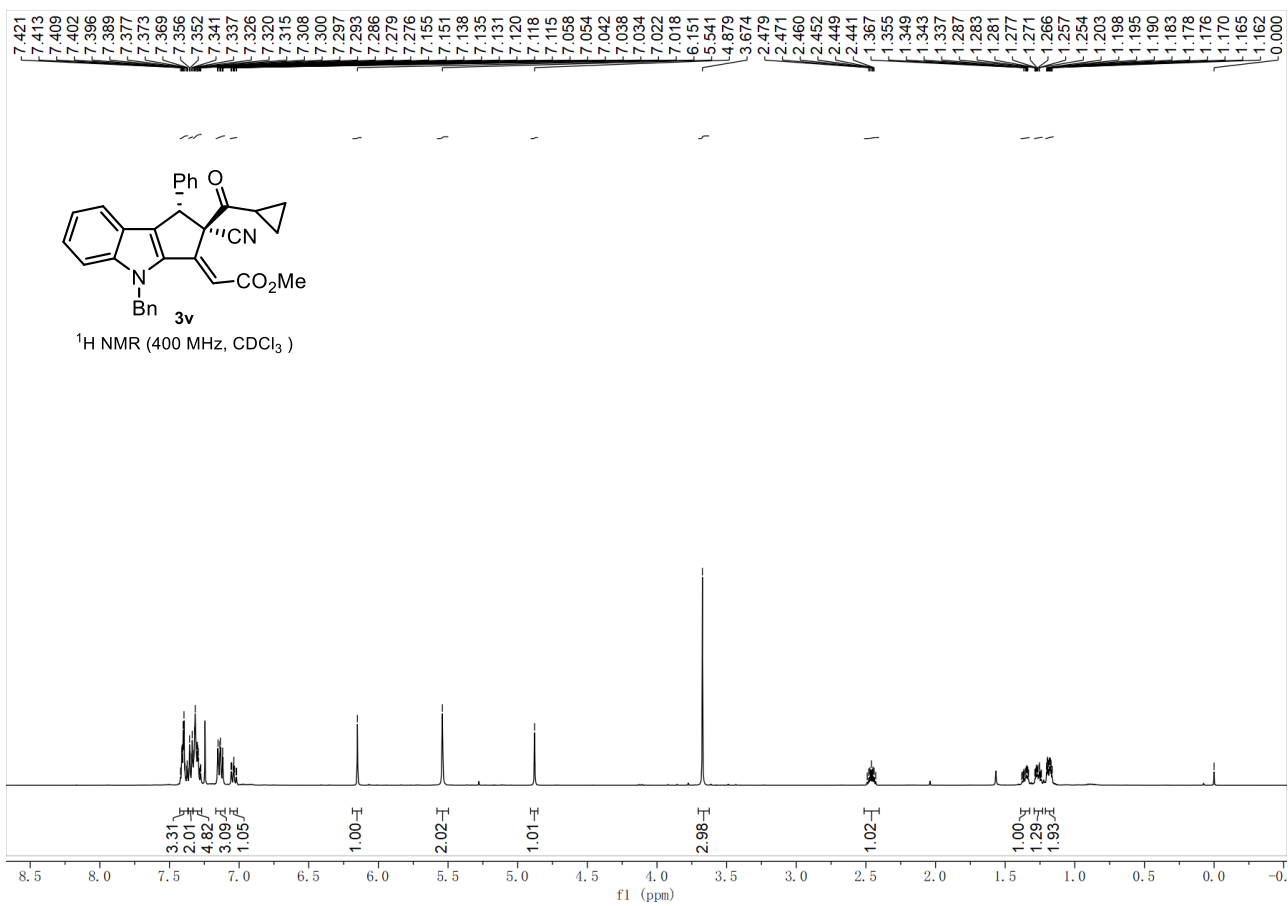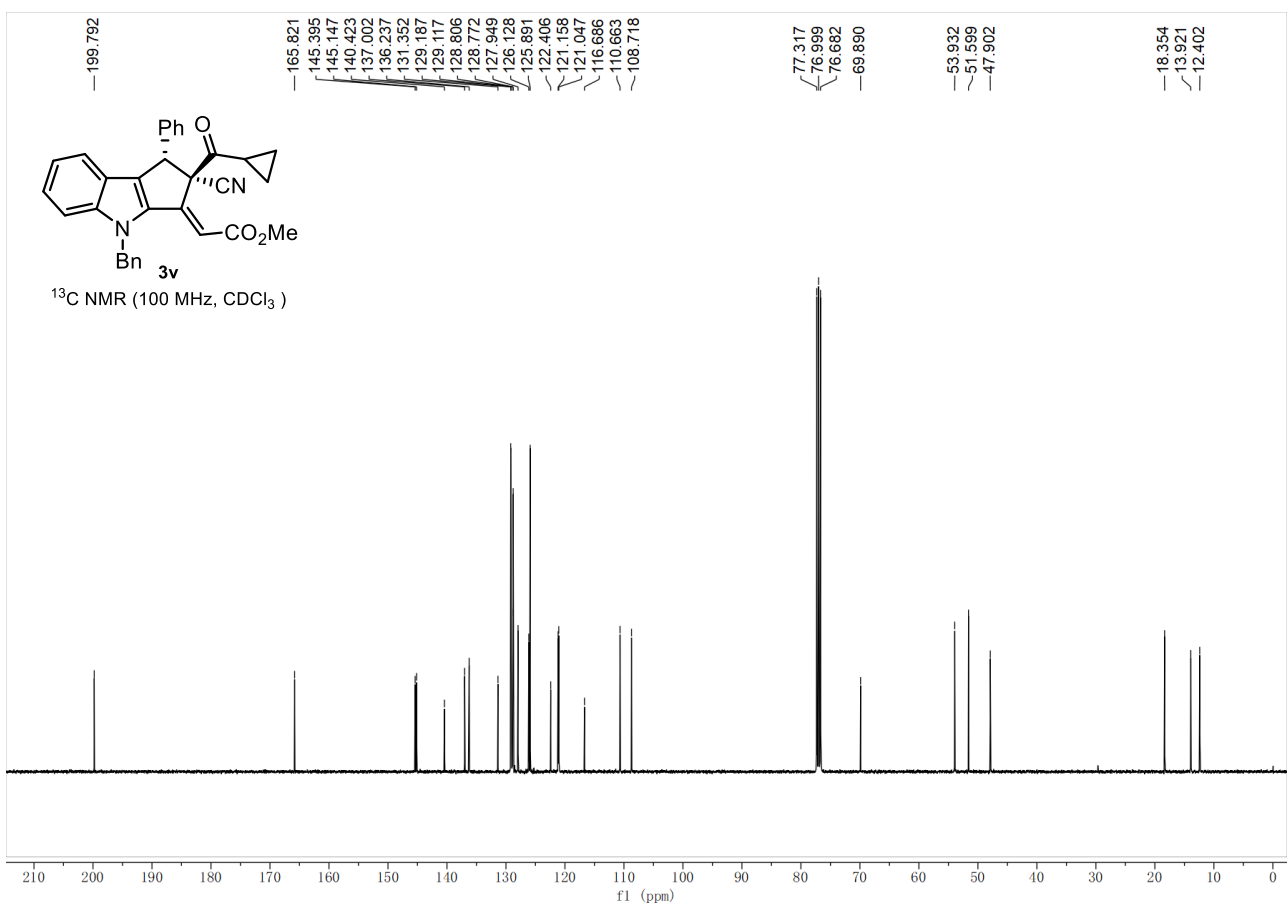

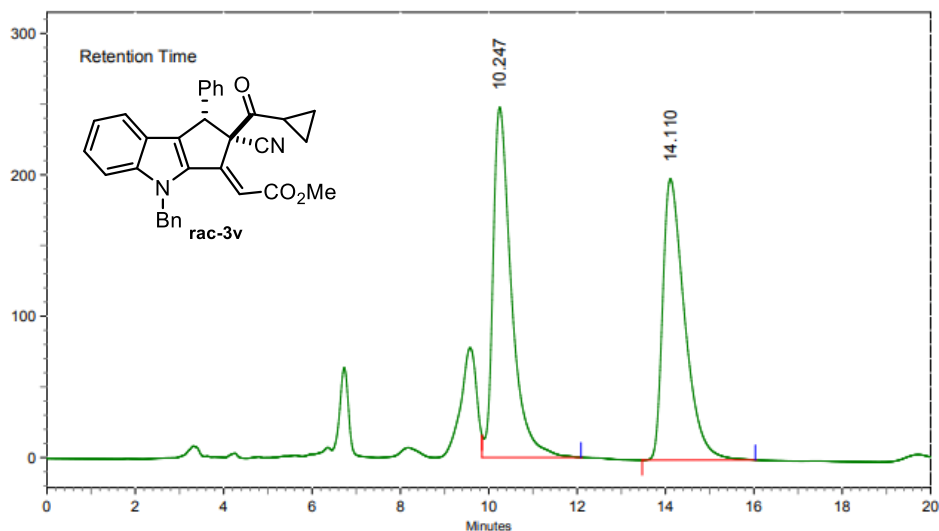

### AREA PERCENT REPORT

| Peak No. | Ret Time | Width | Height  | Area      | Area [%] |
|----------|----------|-------|---------|-----------|----------|
| 1        | 10.247   | 2.240 | 4154975 | 120554112 | 51.1625  |
| 2        | 14.110   | 2.560 | 3335470 | 115075891 | 48.8375  |

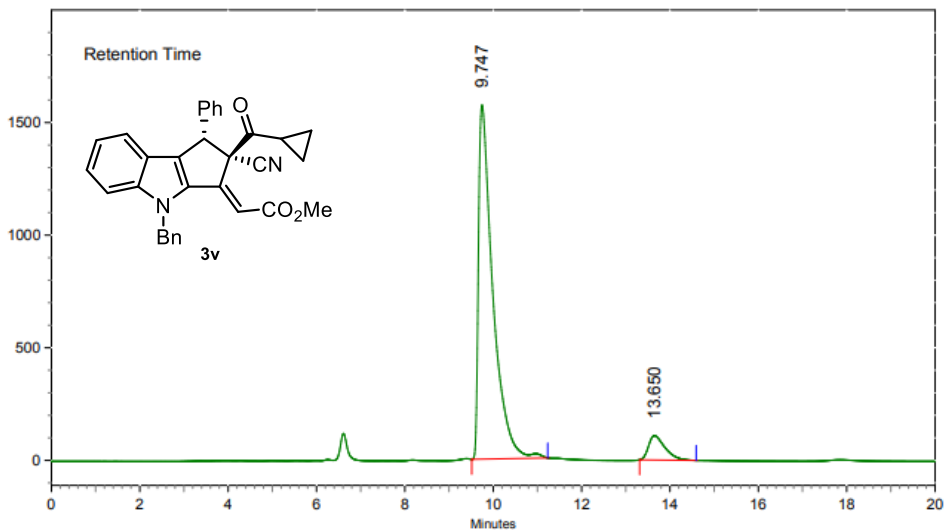

### AREA PERCENT REPORT

| Peak No. | Ret Time | Width | Height   | Area      | Area [%] |
|----------|----------|-------|----------|-----------|----------|
| 1        | 9.747    | 1.720 | 26375701 | 593443940 | 92.6760  |
| 2        | 13.650   | 1.280 | 1810361  | 46898570  | 7.3240   |

|                |                 |              |                |            |              |                   |                                  |
|----------------|-----------------|--------------|----------------|------------|--------------|-------------------|----------------------------------|
| Name           | CYC-220406-43   | Rack Pos.    |                | Instrument | Instrument 1 | Operator          |                                  |
| Inj. Vol. (ul) | 8               | Plate Pos.   |                | IRM Status | Success      |                   |                                  |
| Data File      | CYC-220406-43.d | Method (Acq) | ZYJ-20201106.m | Comment    |              | Acq. Time (Local) | 4/9/2022 11:10:01 AM (UTC+08:00) |

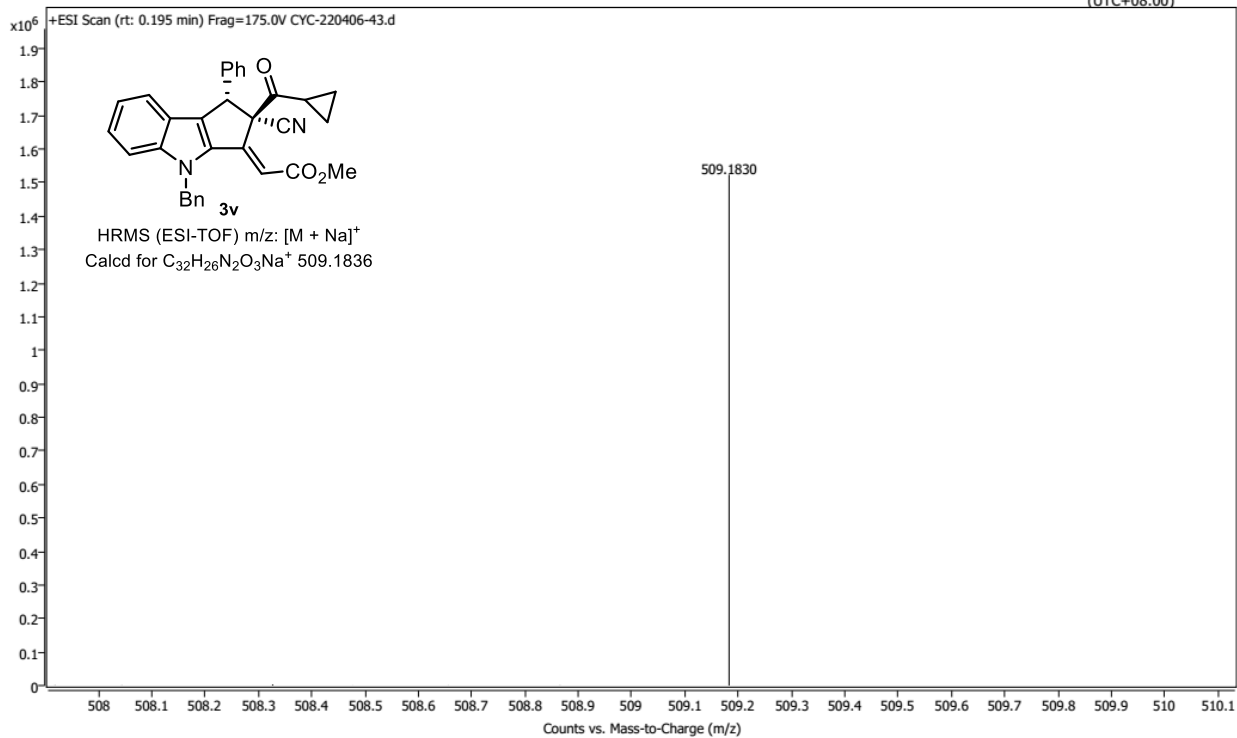

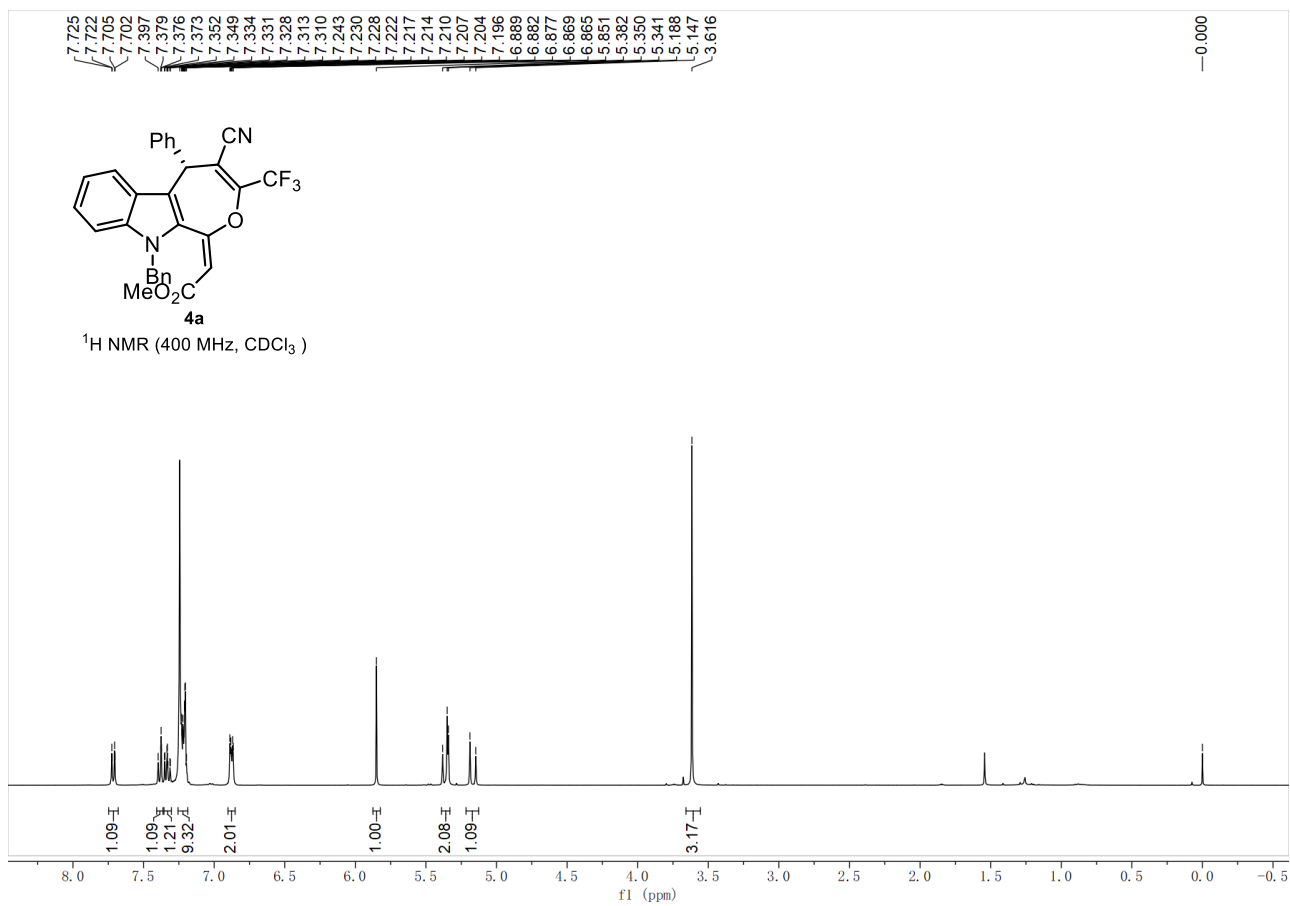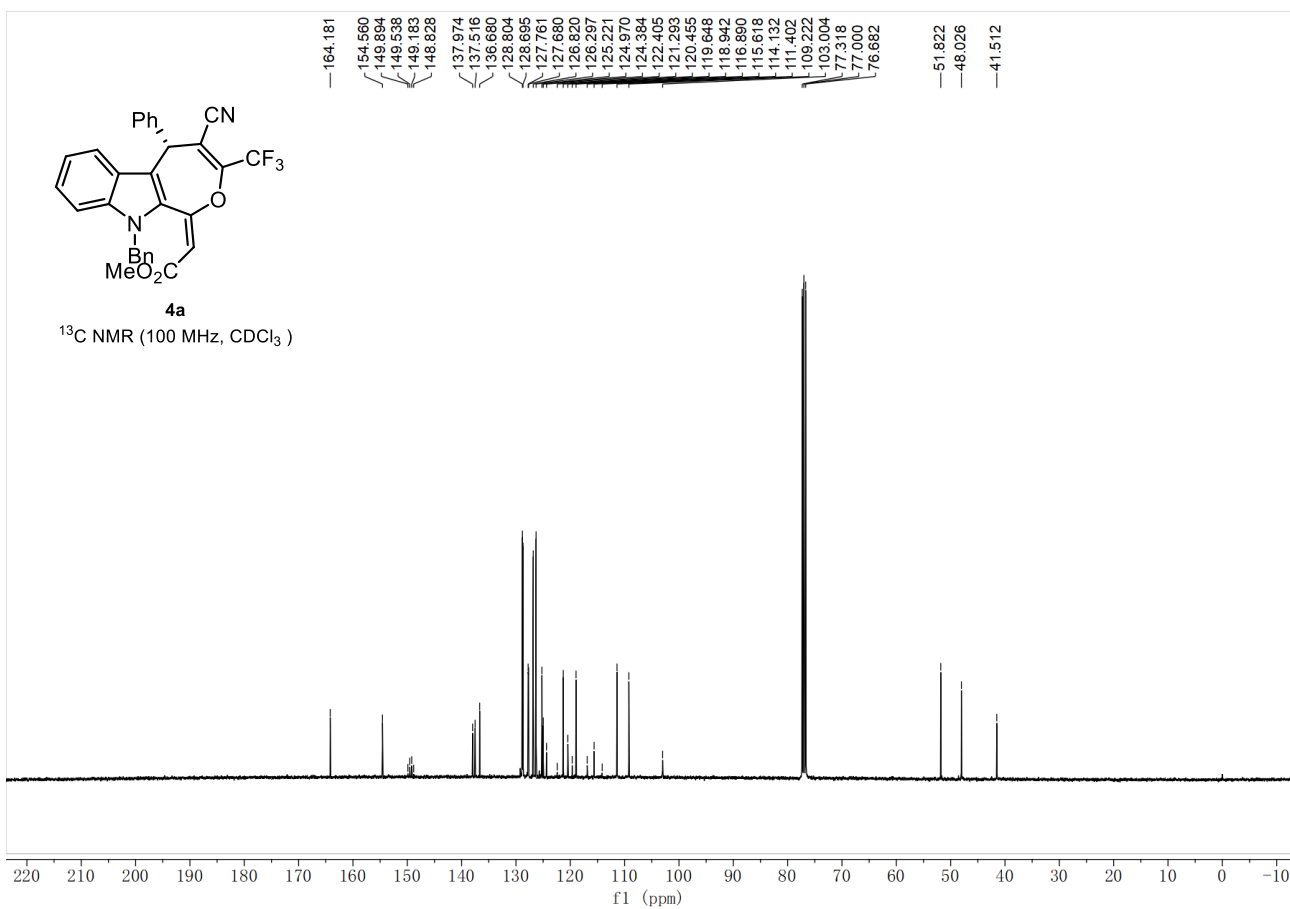

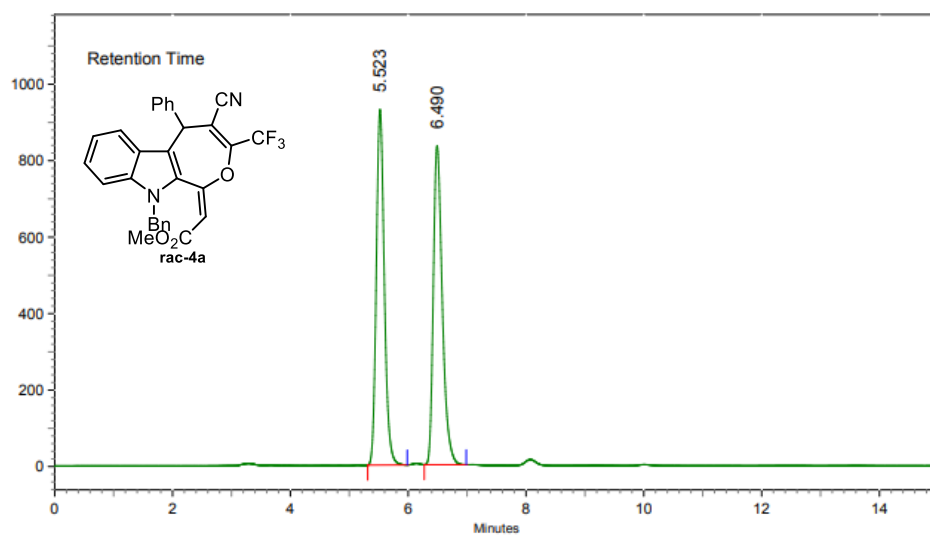

### AREA PERCENT REPORT

| Peak No. | Ret Time | Width | Height   | Area      | Area [%] |
|----------|----------|-------|----------|-----------|----------|
| 1        | 5.523    | 0.670 | 15600429 | 147327827 | 49.8698  |
| 2        | 6.490    | 0.713 | 13990158 | 148097265 | 50.1302  |

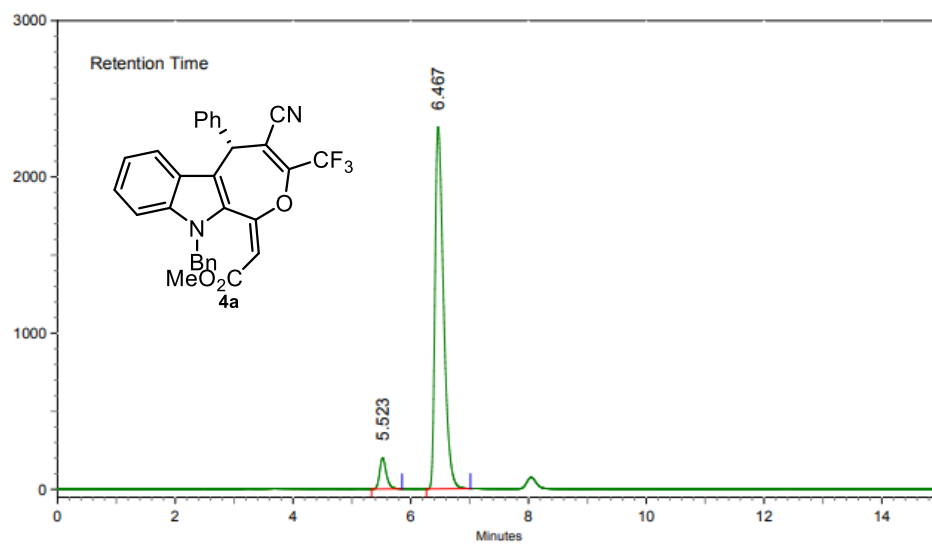

### AREA PERCENT REPORT

| Peak No. | Ret Time | Width | Height   | Area      | Area [%] |
|----------|----------|-------|----------|-----------|----------|
| 1        | 5.523    | 0.520 | 3349990  | 26433556  | 6.3092   |
| 2        | 6.467    | 0.747 | 38872533 | 392533493 | 93.6908  |



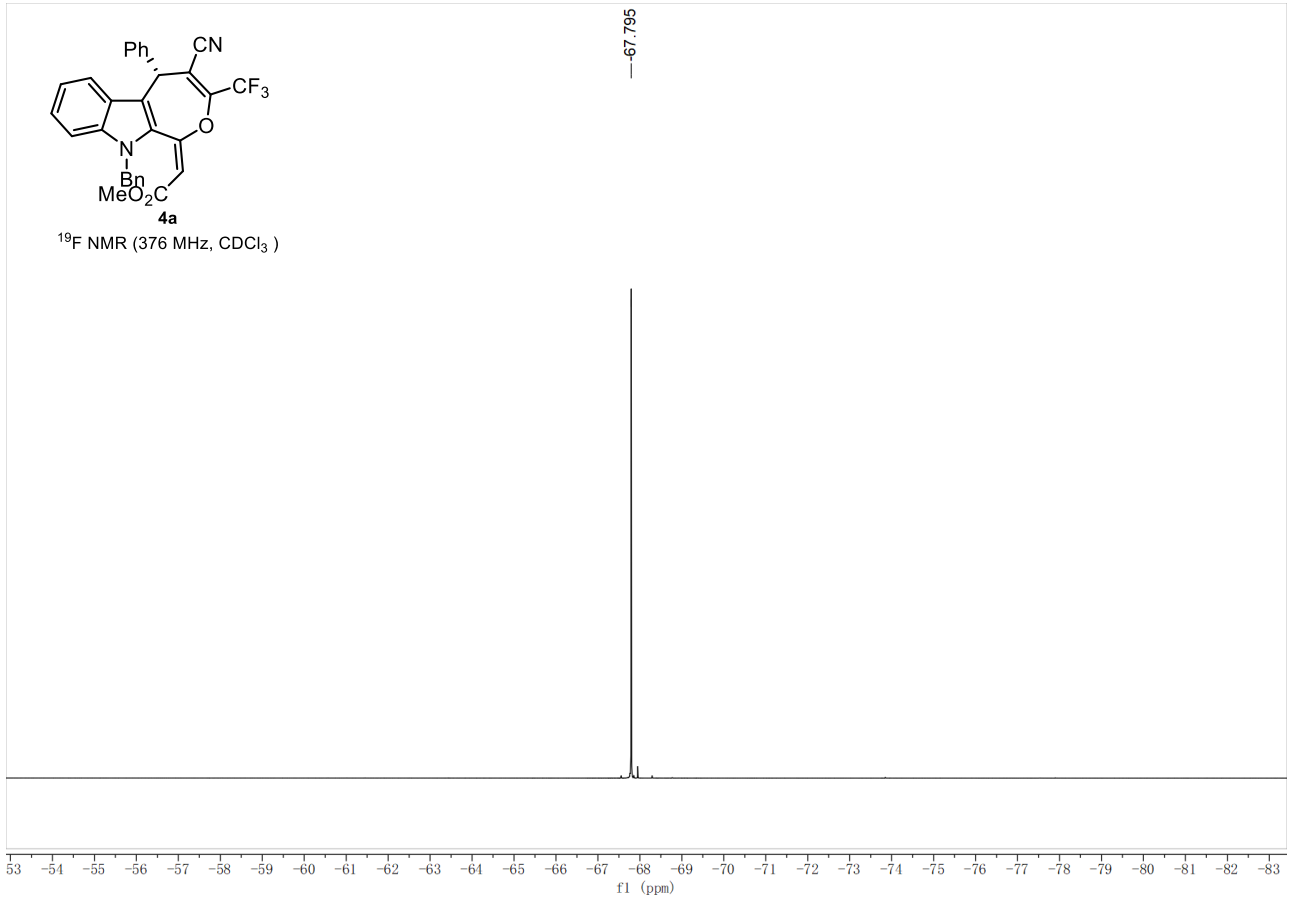

| Name           | CYC-220406-42   | Rack Pos.    | Instrument     | Instrument 1 | Operator                                           |
|----------------|-----------------|--------------|----------------|--------------|----------------------------------------------------|
| Inj. Vol. (ul) | 8               | Plate Pos.   | IRM Status     | Success      |                                                    |
| Data File      | CYC-220406-42.d | Method (Acq) | ZYJ-20201106.m |              | Acq. Time (Local) 4/9/2022 11:07:04 AM (UTC+08:00) |

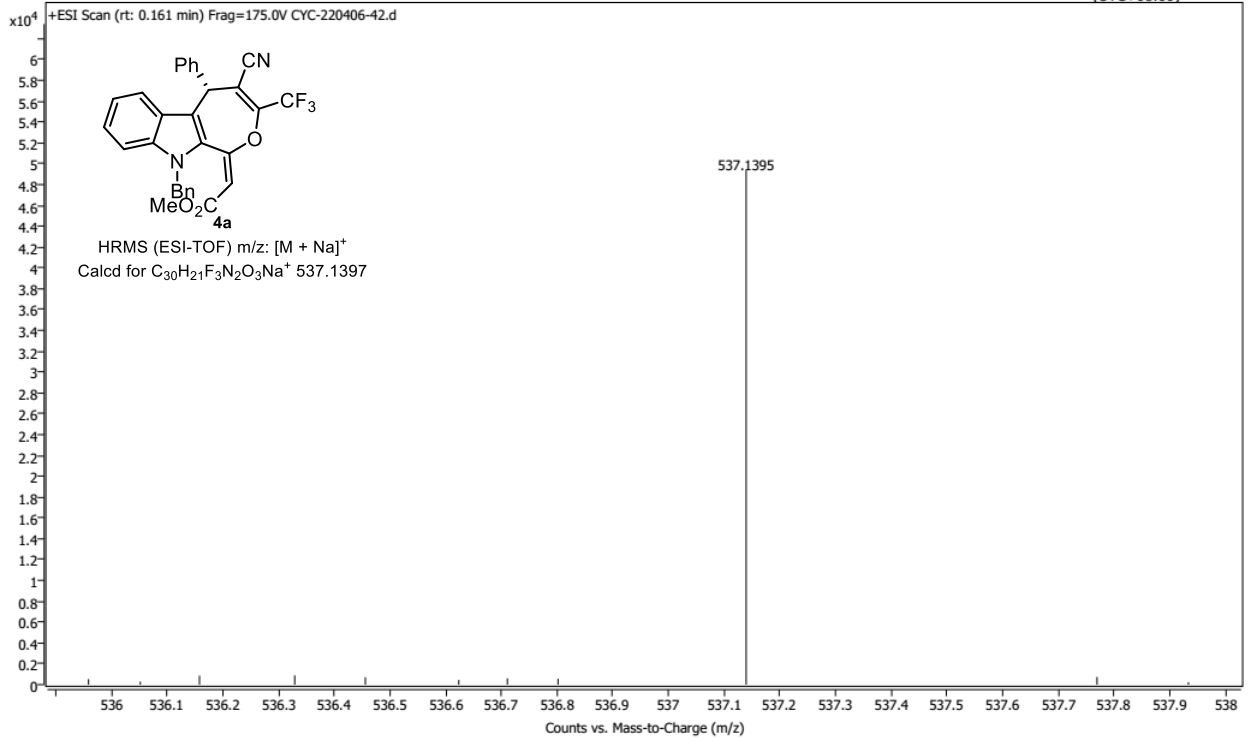

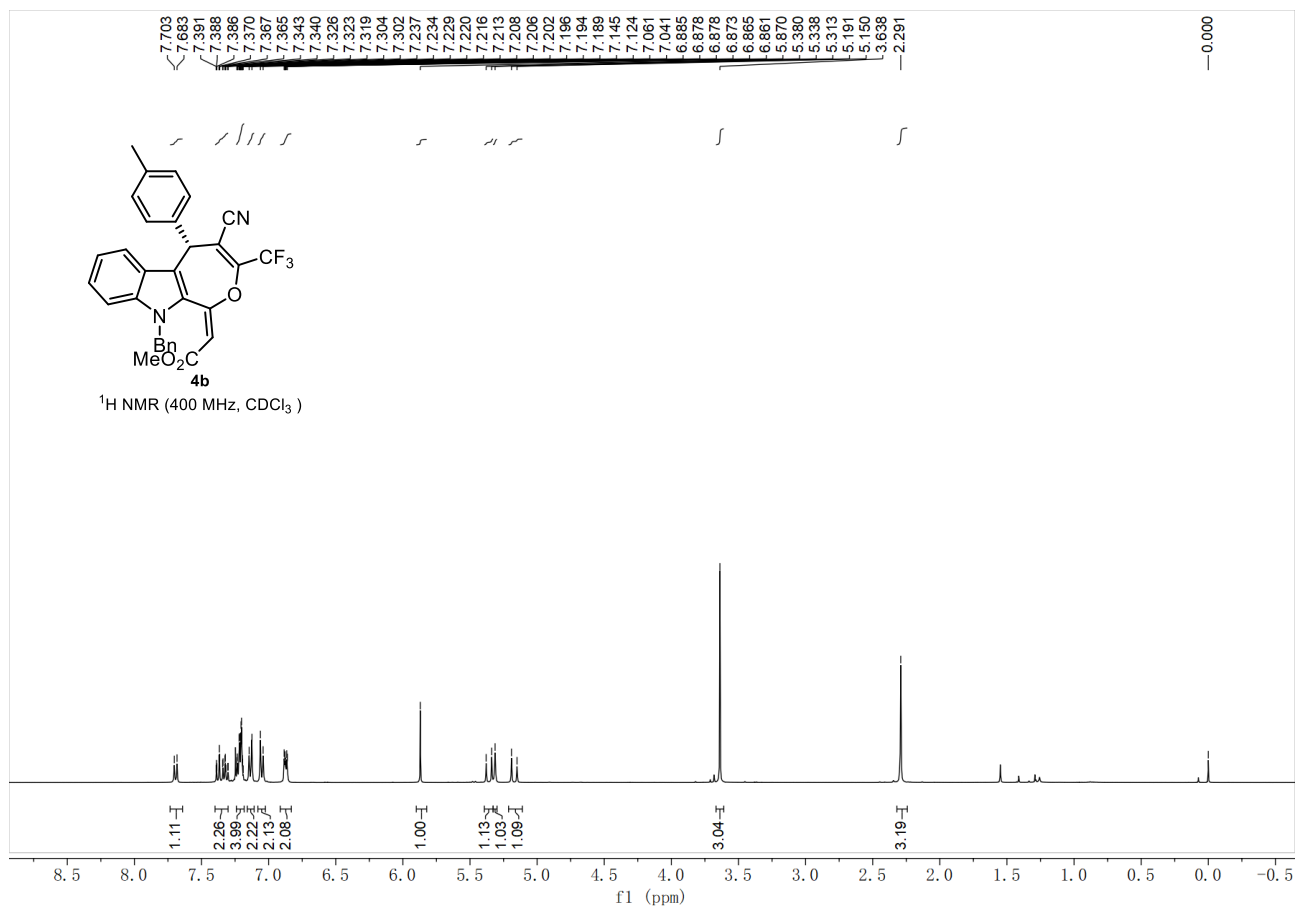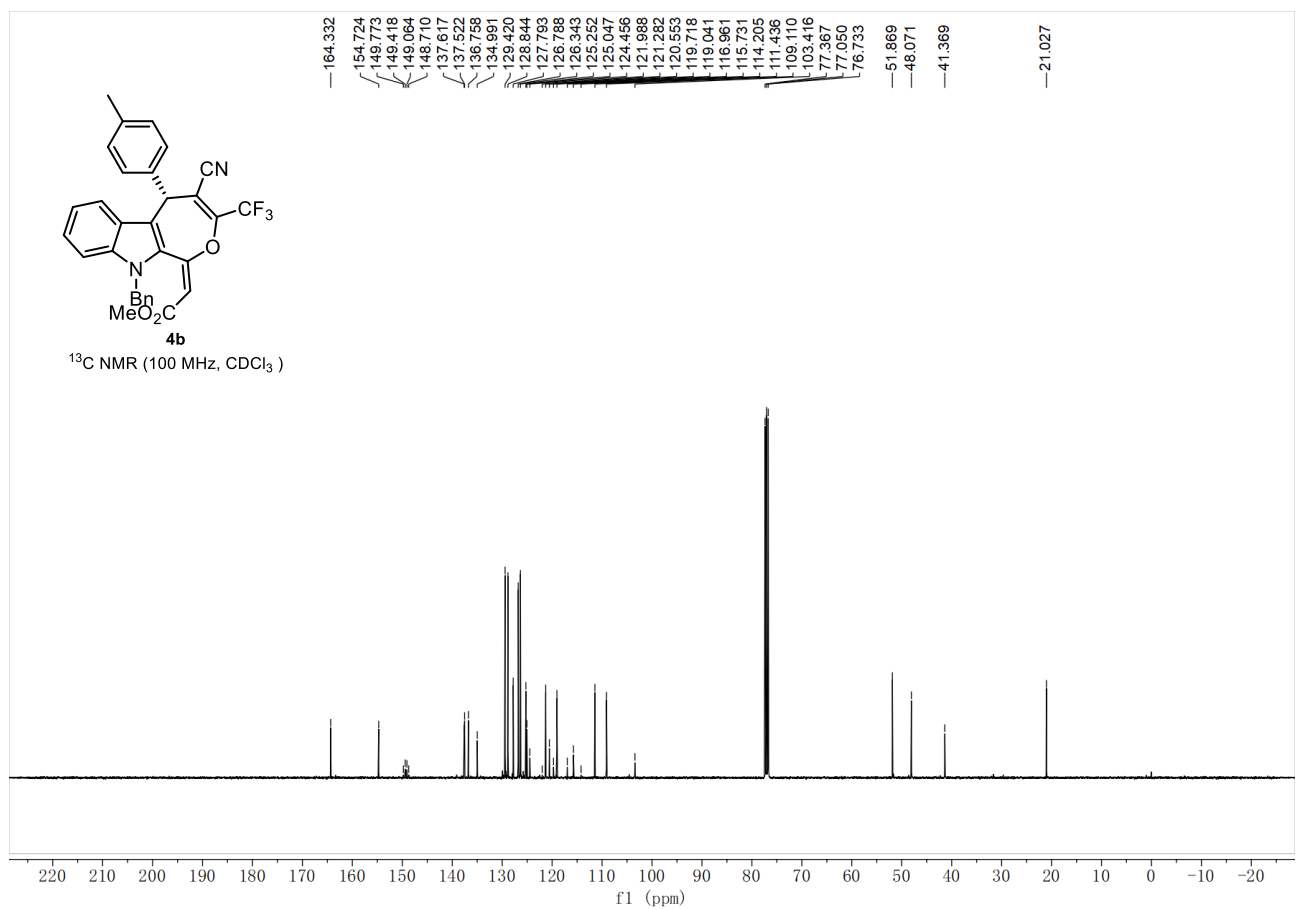

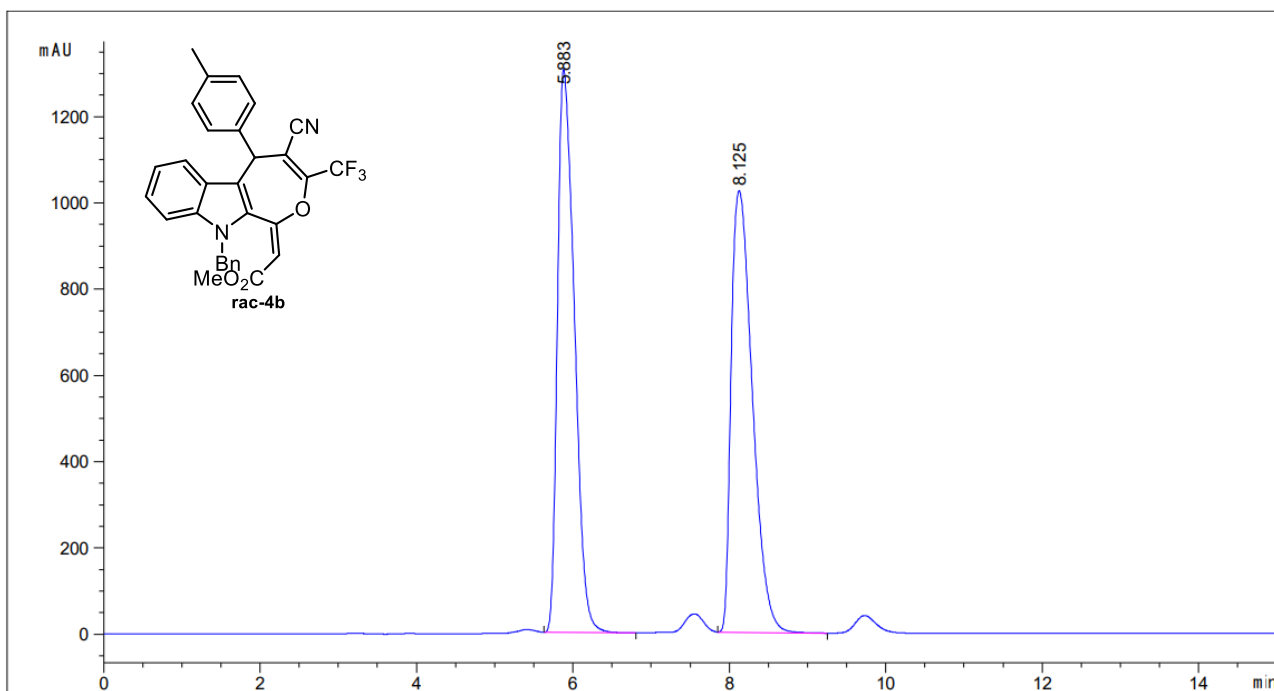

| Peak # | RetTime [min] | Type | Width [min] | Area mAU *s | Height [mAU] | Area %  |
|--------|---------------|------|-------------|-------------|--------------|---------|
| 1      | 5.883         | BB   | 0.2462      | 1.95629e4   | 1305.58386   | 50.4083 |
| 2      | 8.125         | BBA  | 0.2965      | 1.92460e4   | 1023.95667   | 49.5917 |

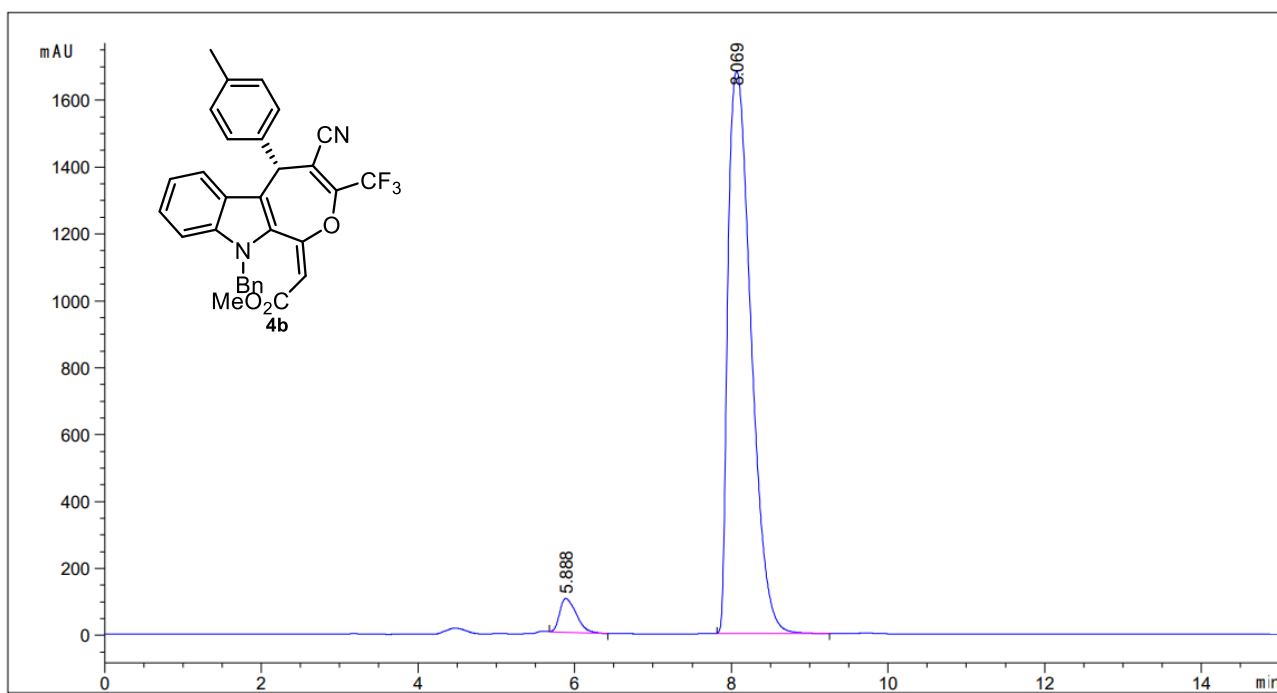

| Peak # | RetTime [min] | Type | Width [min] | Area mAU *s | Height [mAU] | Area %  |
|--------|---------------|------|-------------|-------------|--------------|---------|
| 1      | 5.888         | VB   | 0.2403      | 1493.01111  | 101.34855    | 4.1779  |
| 2      | 8.069         | BBA  | 0.3234      | 3.42425e4   | 1682.23621   | 95.8221 |

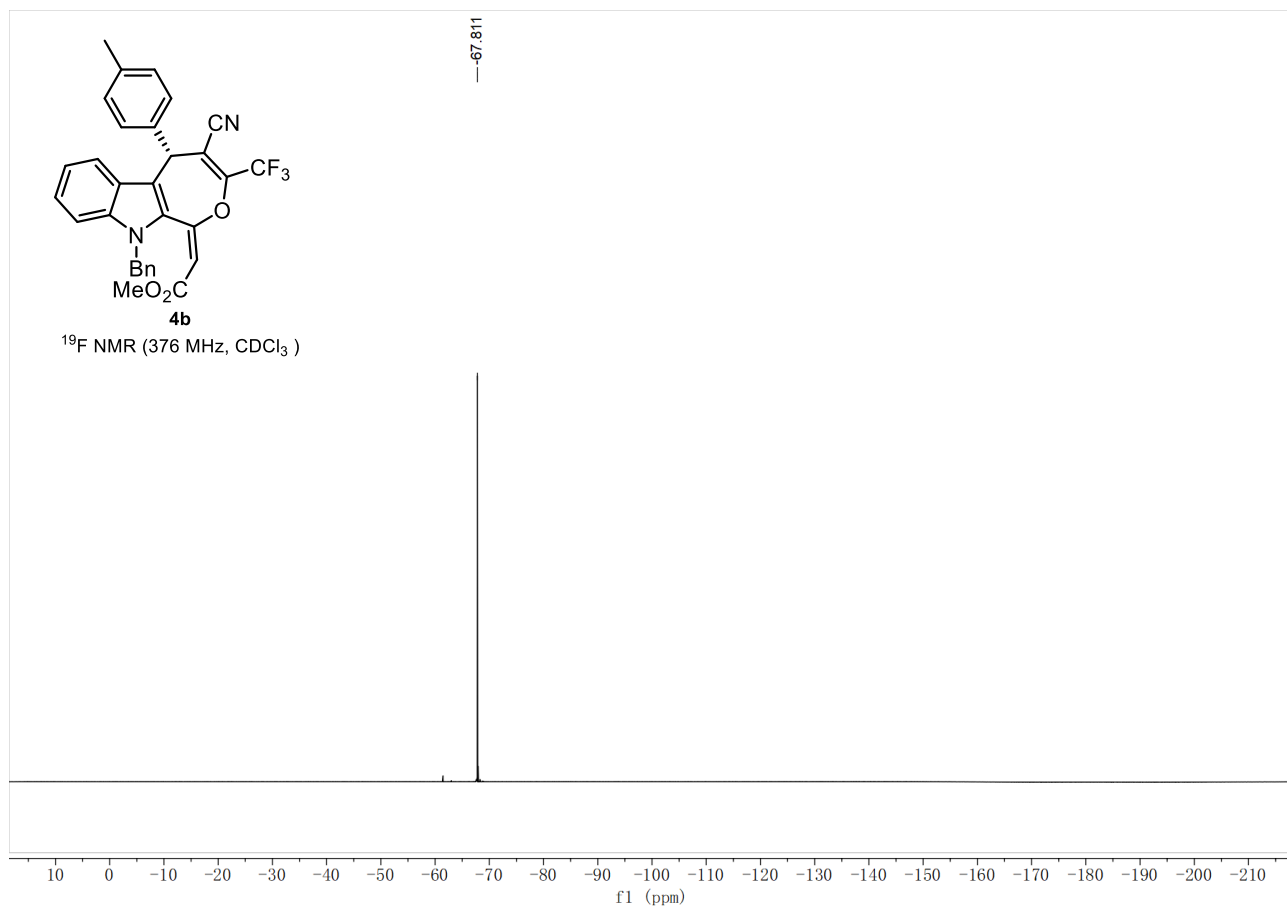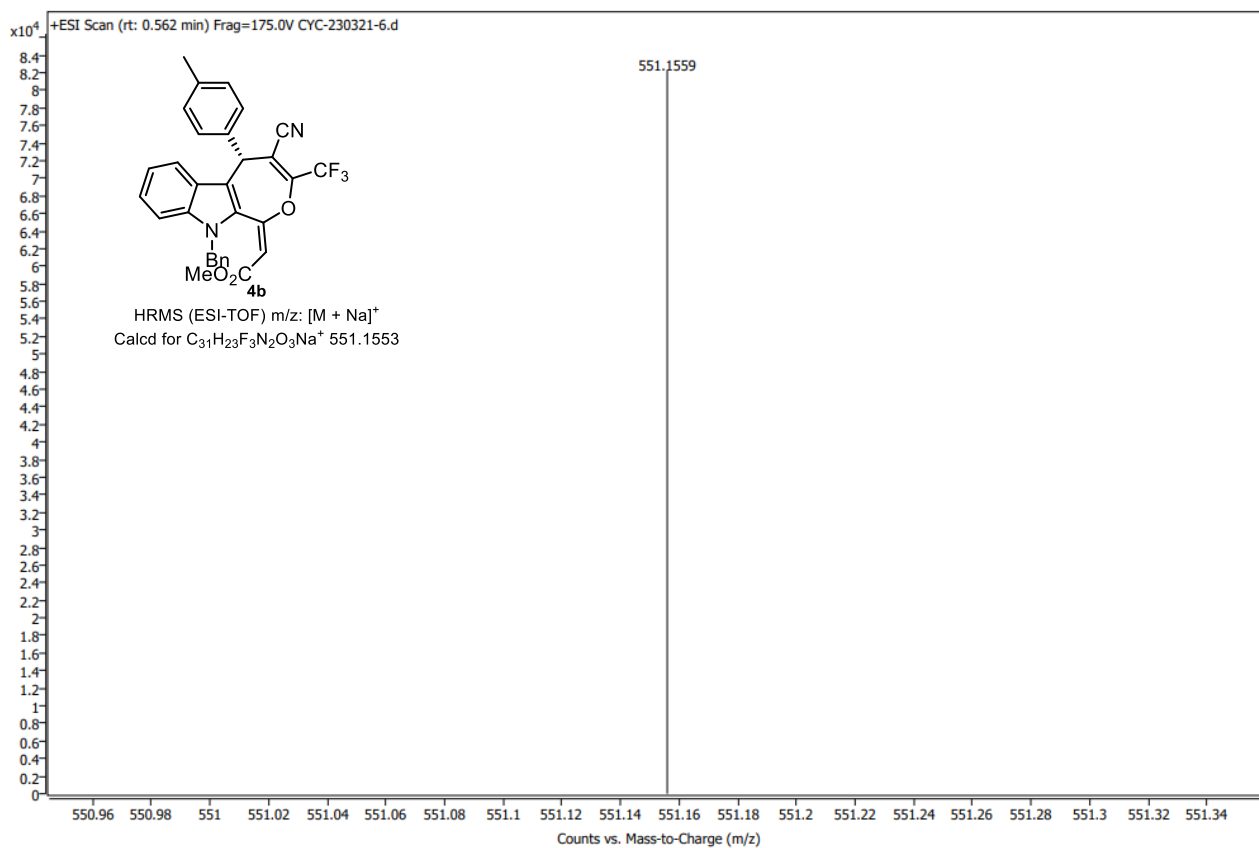

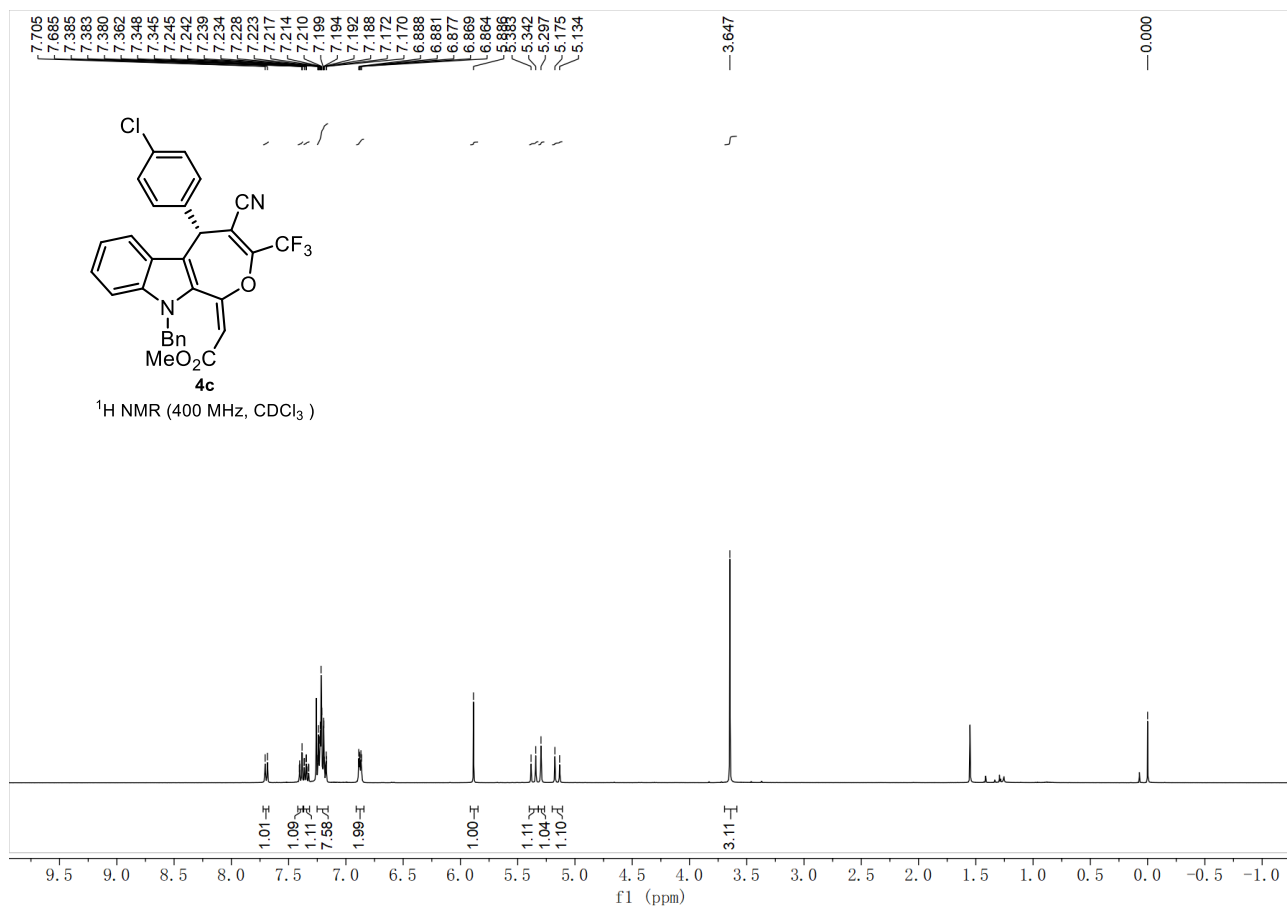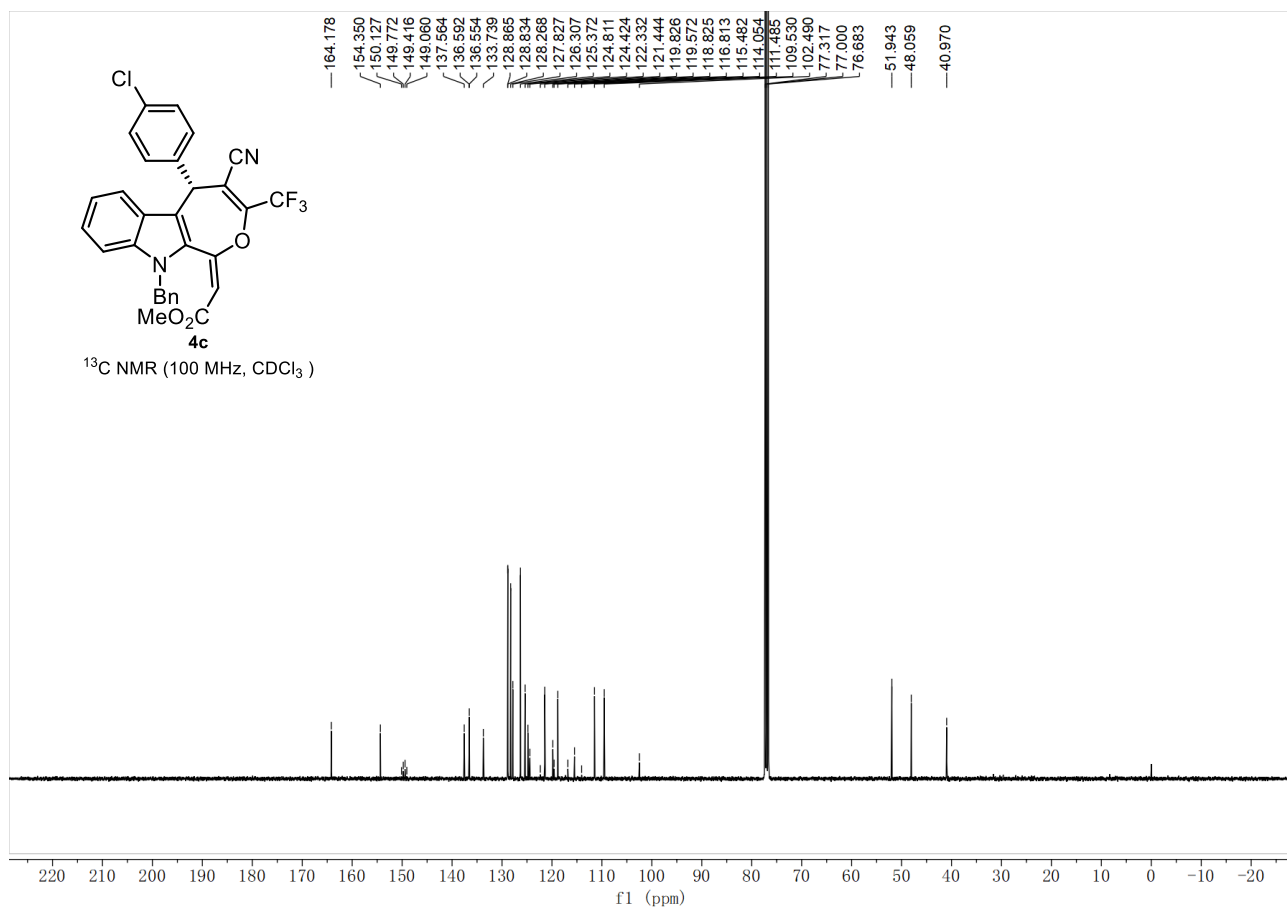

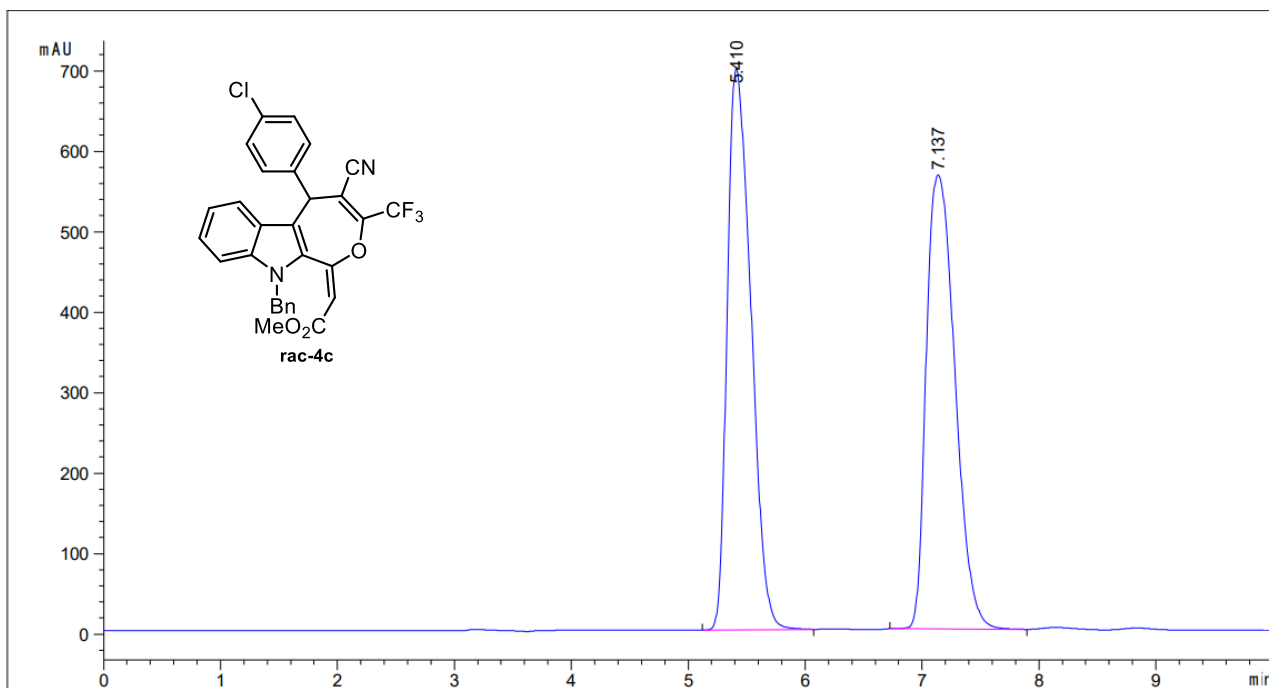

| Peak # | RetTime [min] | Type | Width [min] | Area mAU *s | Height [mAU] | Area %  |
|--------|---------------|------|-------------|-------------|--------------|---------|
| 1      | 5.410         | BBA  | 0.2324      | 9803.88086  | 697.57941    | 50.4515 |
| 2      | 7.137         | BBA  | 0.2734      | 9628.40820  | 564.00427    | 49.5485 |

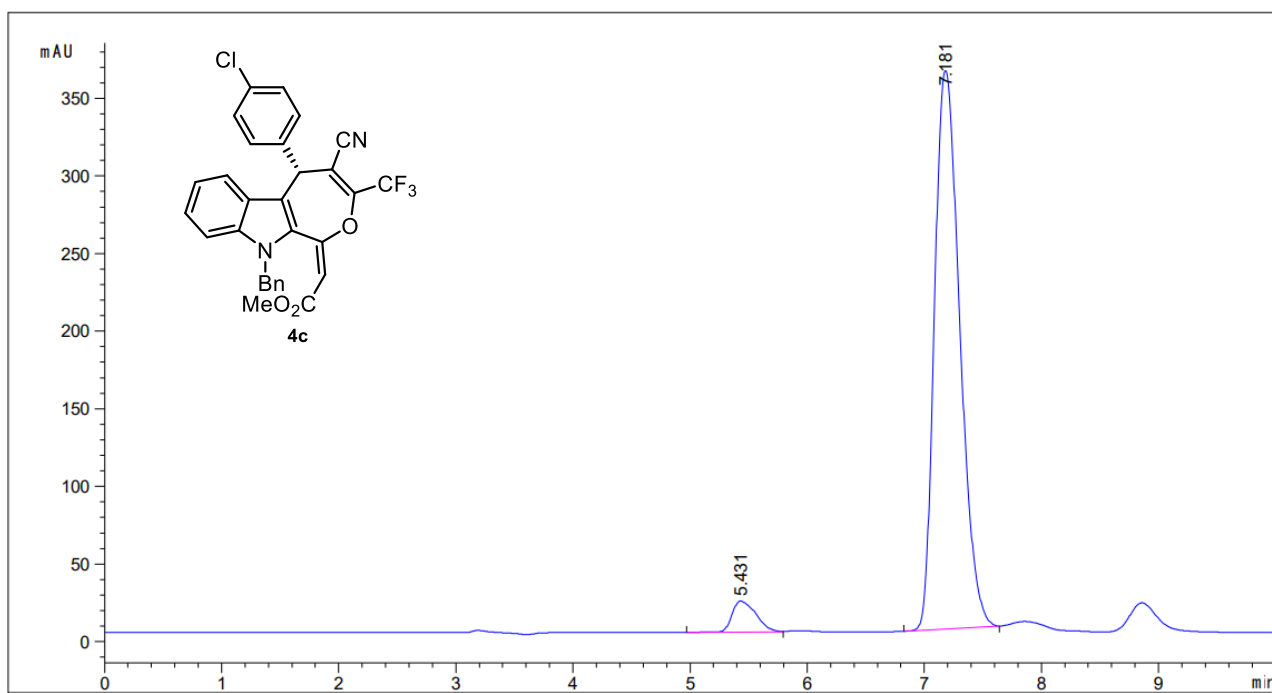

| Peak # | RetTime [min] | Type | Width [min] | Area mAU *s | Height [mAU] | Area %  |
|--------|---------------|------|-------------|-------------|--------------|---------|
| 1      | 5.431         | BV   | 0.2311      | 281.01428   | 19.98114     | 4.9671  |
| 2      | 7.181         | BB   | 0.2356      | 5376.52393  | 359.63049    | 95.0329 |

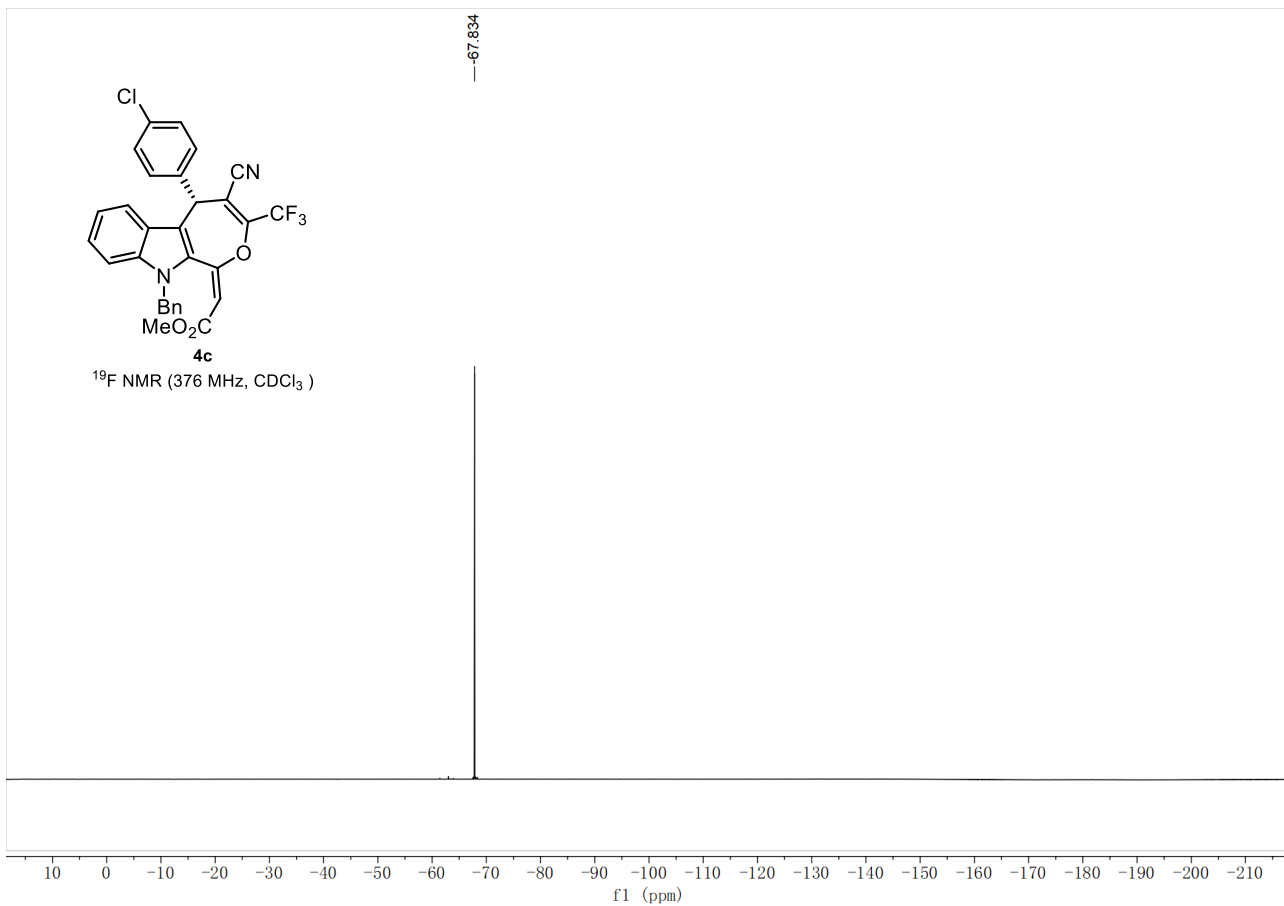

| Name           | CYC-230321-7   | Rack Pos.    | Instrument   | Instrument 1     | Operator                                            |
|----------------|----------------|--------------|--------------|------------------|-----------------------------------------------------|
| Inj. Vol. (ul) | 8              | Plate Pos.   | IRM Status   | Some ions missed |                                                     |
| Data File      | CYC-230321-7.d | Method (Acq) | CJH 230210.m | Comment          | Acq. Time (Local) 3/23/2023 12:24:36 PM (UTC+08:00) |

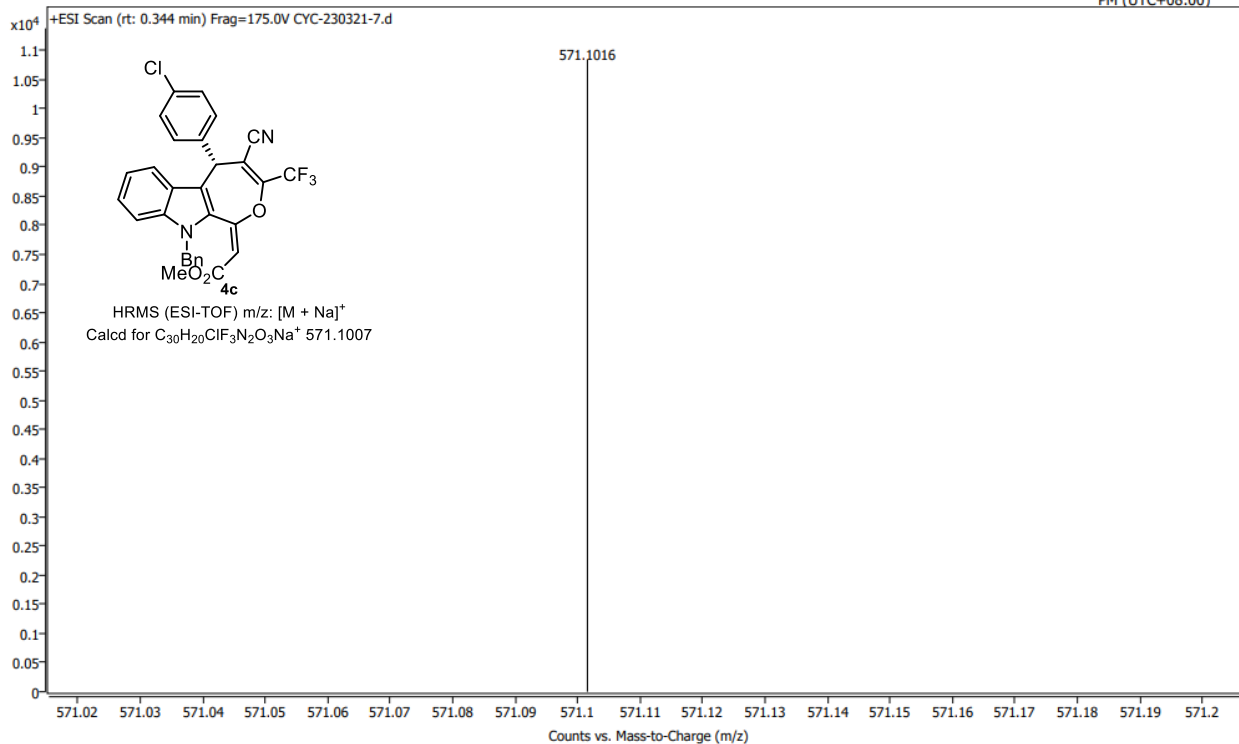

|                |                |              |              |            |                  |                   |                                   |
|----------------|----------------|--------------|--------------|------------|------------------|-------------------|-----------------------------------|
| Name           | CYC-230321-7   | Rack Pos.    |              | Instrument | Instrument 1     | Operator          |                                   |
| Inj. Vol. (ul) | 8              | Plate Pos.   |              | IRM Status | Some ions missed |                   |                                   |
| Data File      | CYC-230321-7.d | Method (Acq) | CJH 230210.m | Comment    |                  | Acq. Time (Local) | 3/23/2023 12:24:36 PM (UTC+08:00) |

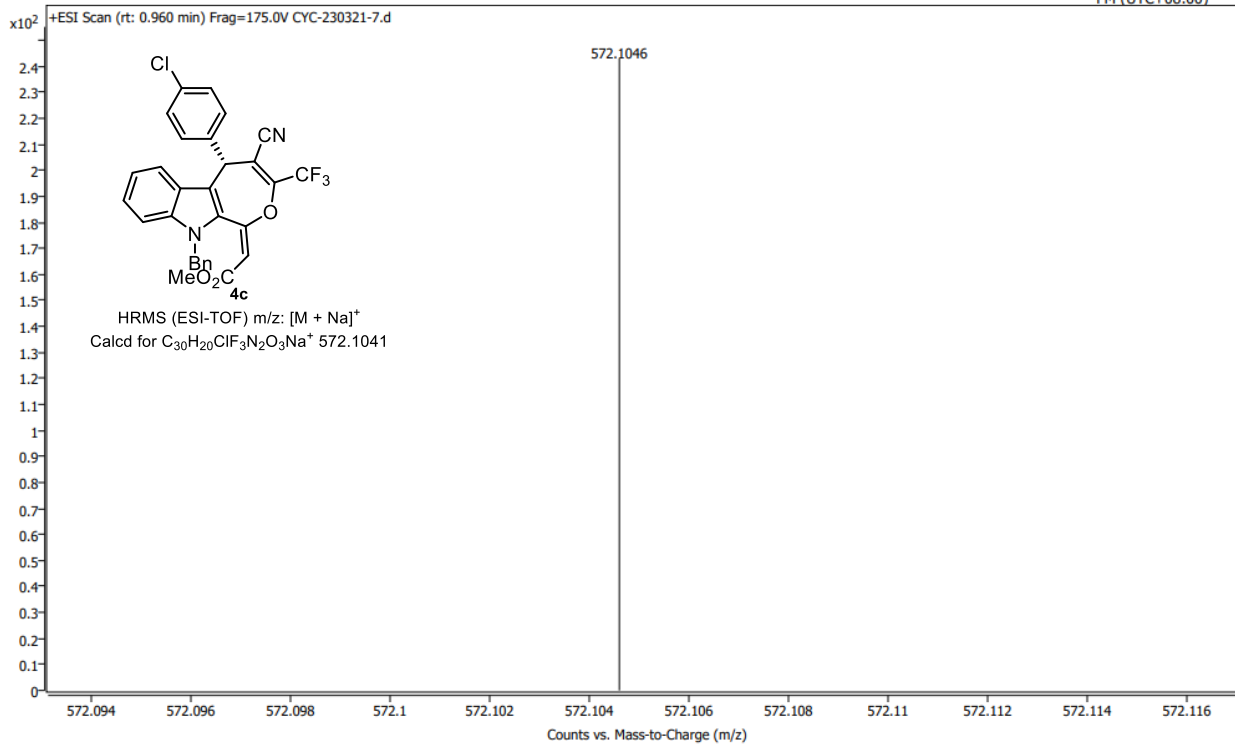



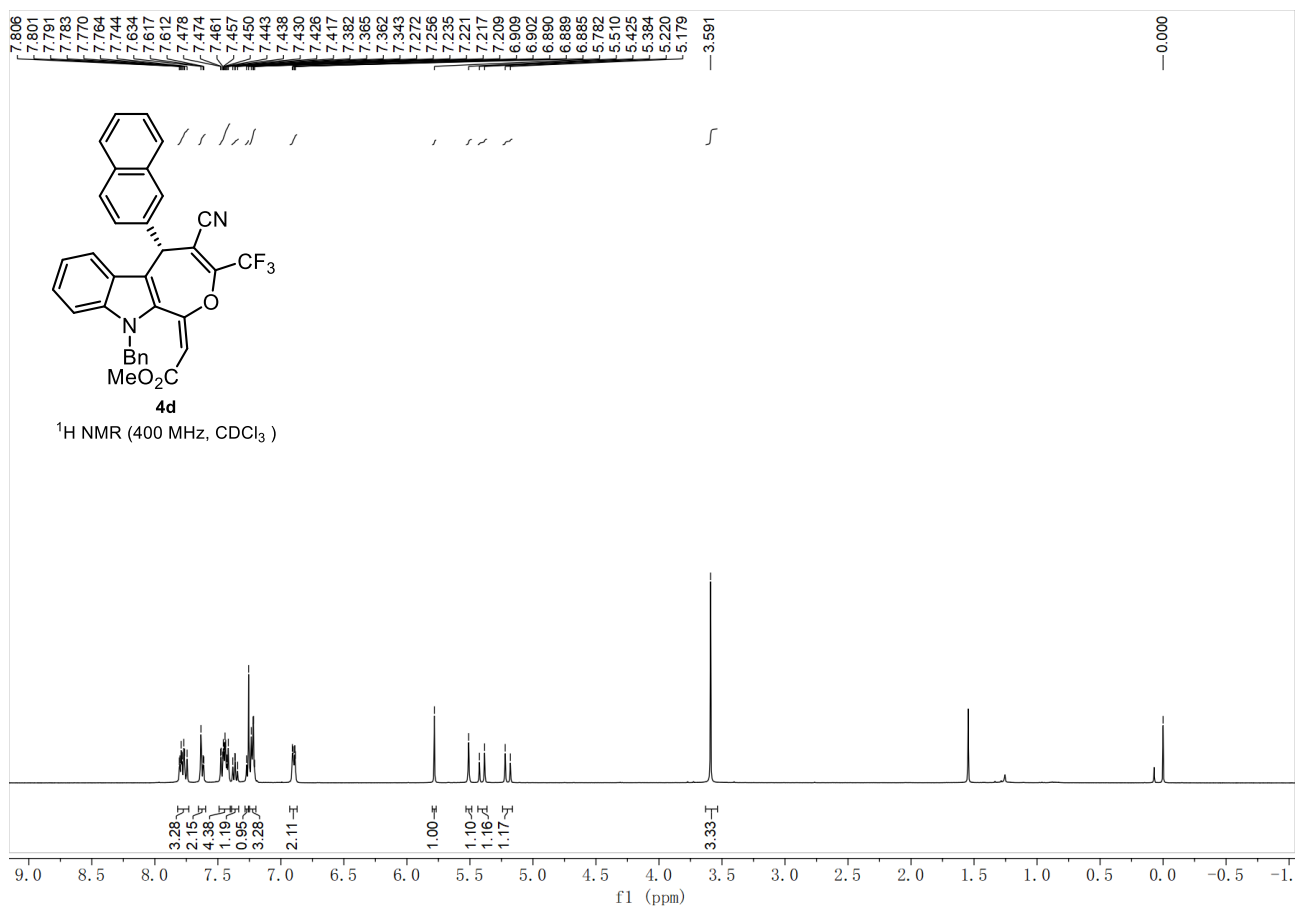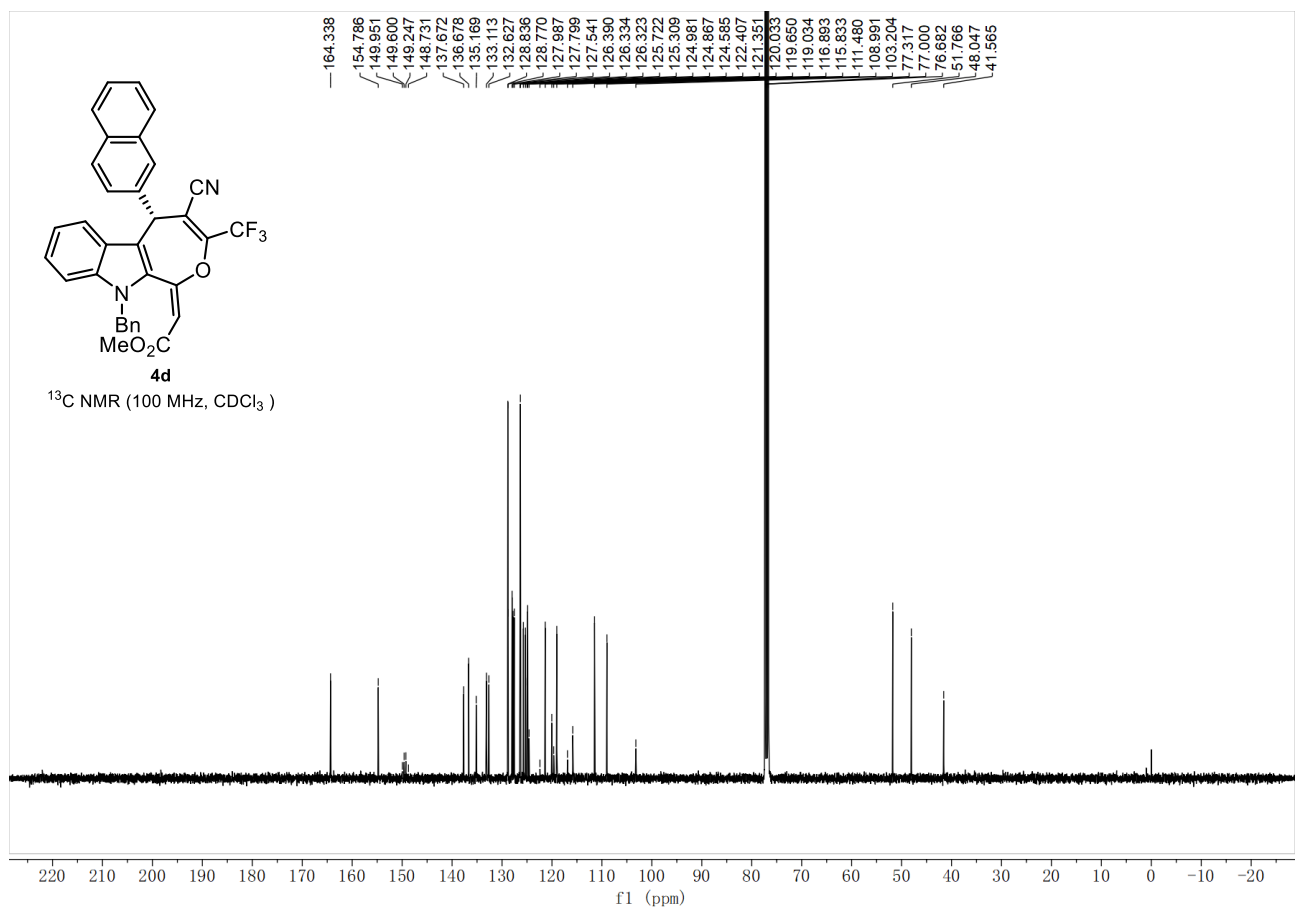

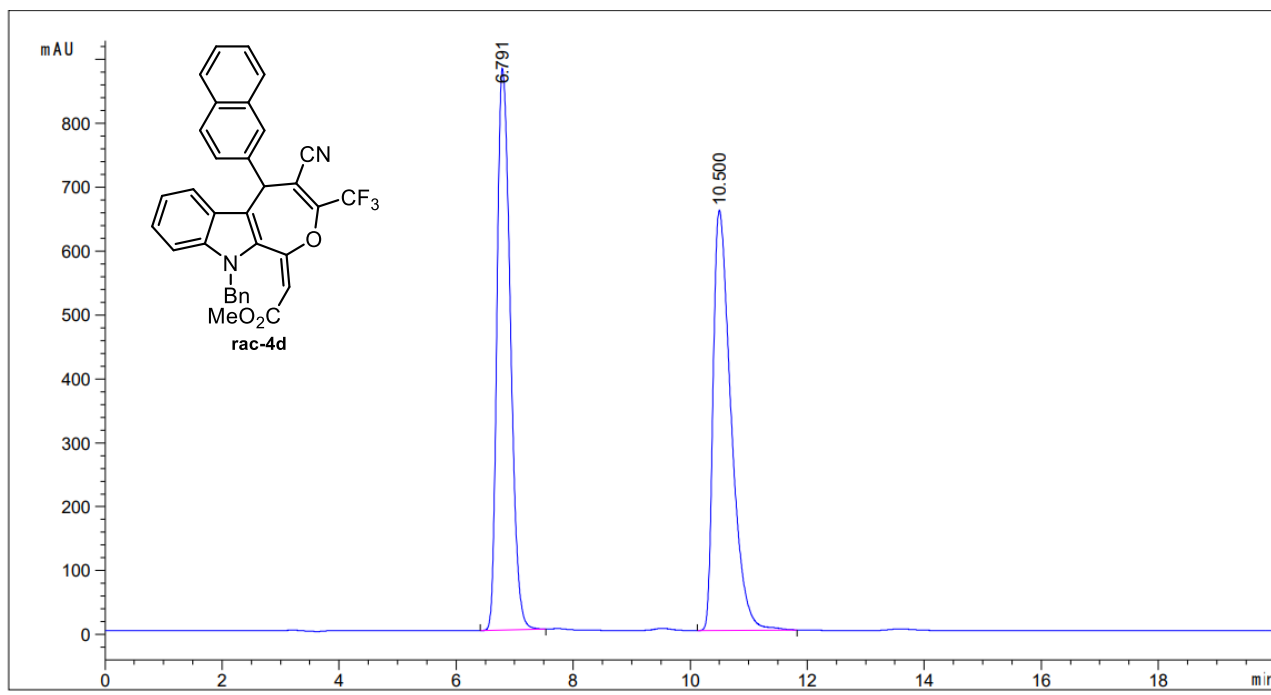

| Peak # | RetTime [min] | Type | Width [min] | Area mAU *s | Height [mAU] | Area %  |
|--------|---------------|------|-------------|-------------|--------------|---------|
| 1      | 6.791         | BBA  | 0.2537      | 1.39510e4   | 878.44855    | 49.9763 |
| 2      | 10.500        | BBA  | 0.3250      | 1.39642e4   | 657.25604    | 50.0237 |

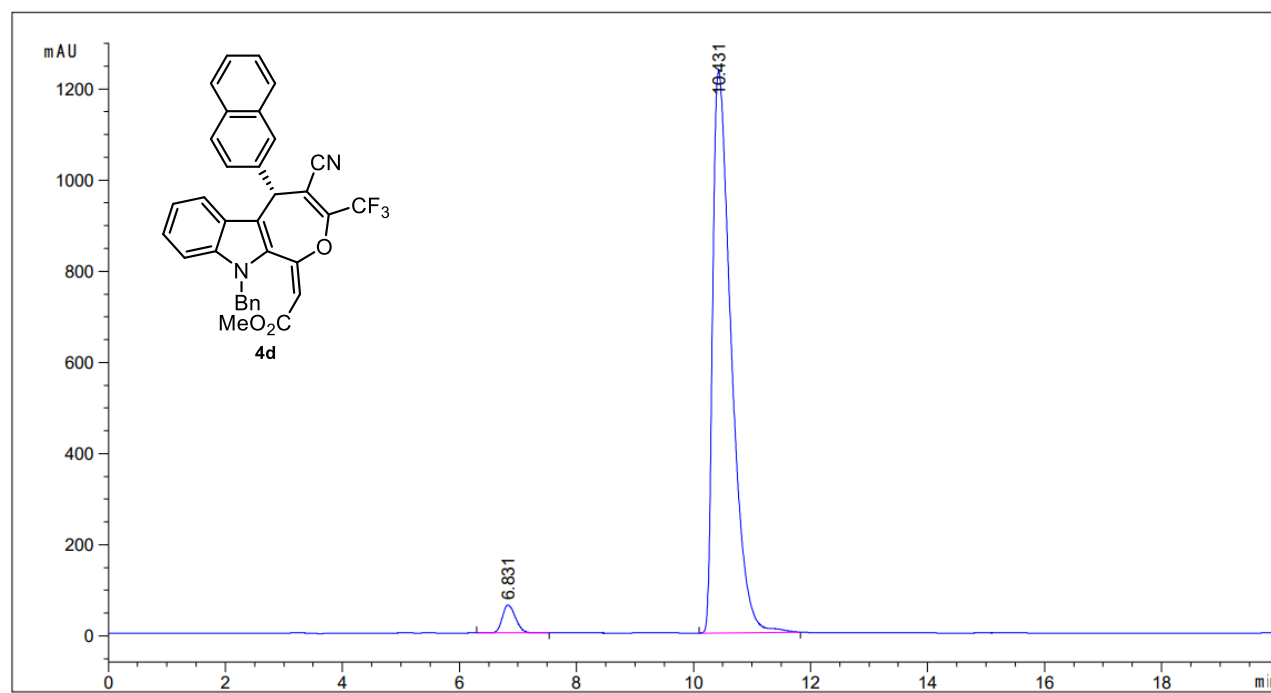

| Peak # | RetTime [min] | Type | Width [min] | Area mAU *s | Height [mAU] | Area %  |
|--------|---------------|------|-------------|-------------|--------------|---------|
| 1      | 6.831         | BBA  | 0.2460      | 952.53131   | 61.07289     | 3.3980  |
| 2      | 10.431        | BBA  | 0.3348      | 2.70797e4   | 1233.45691   | 96.6020 |

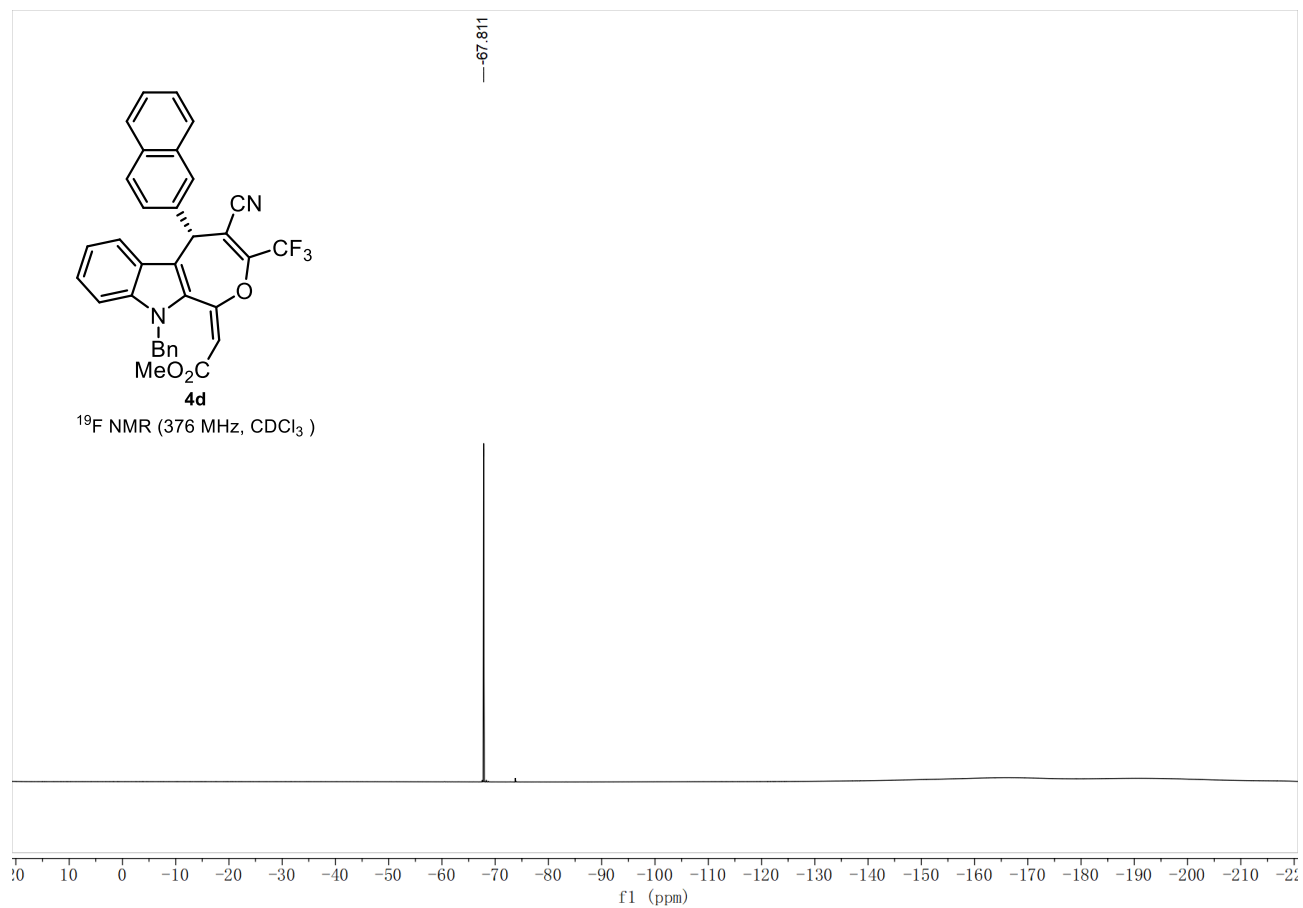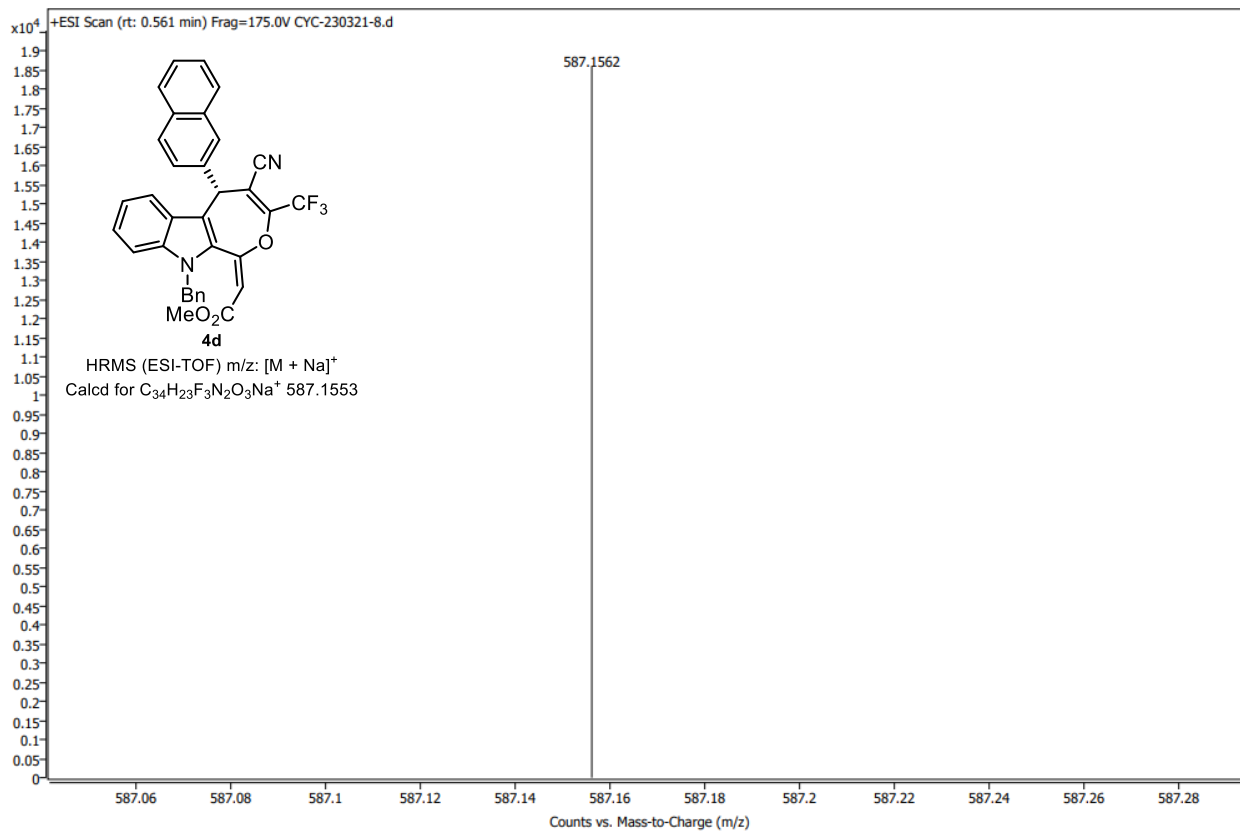

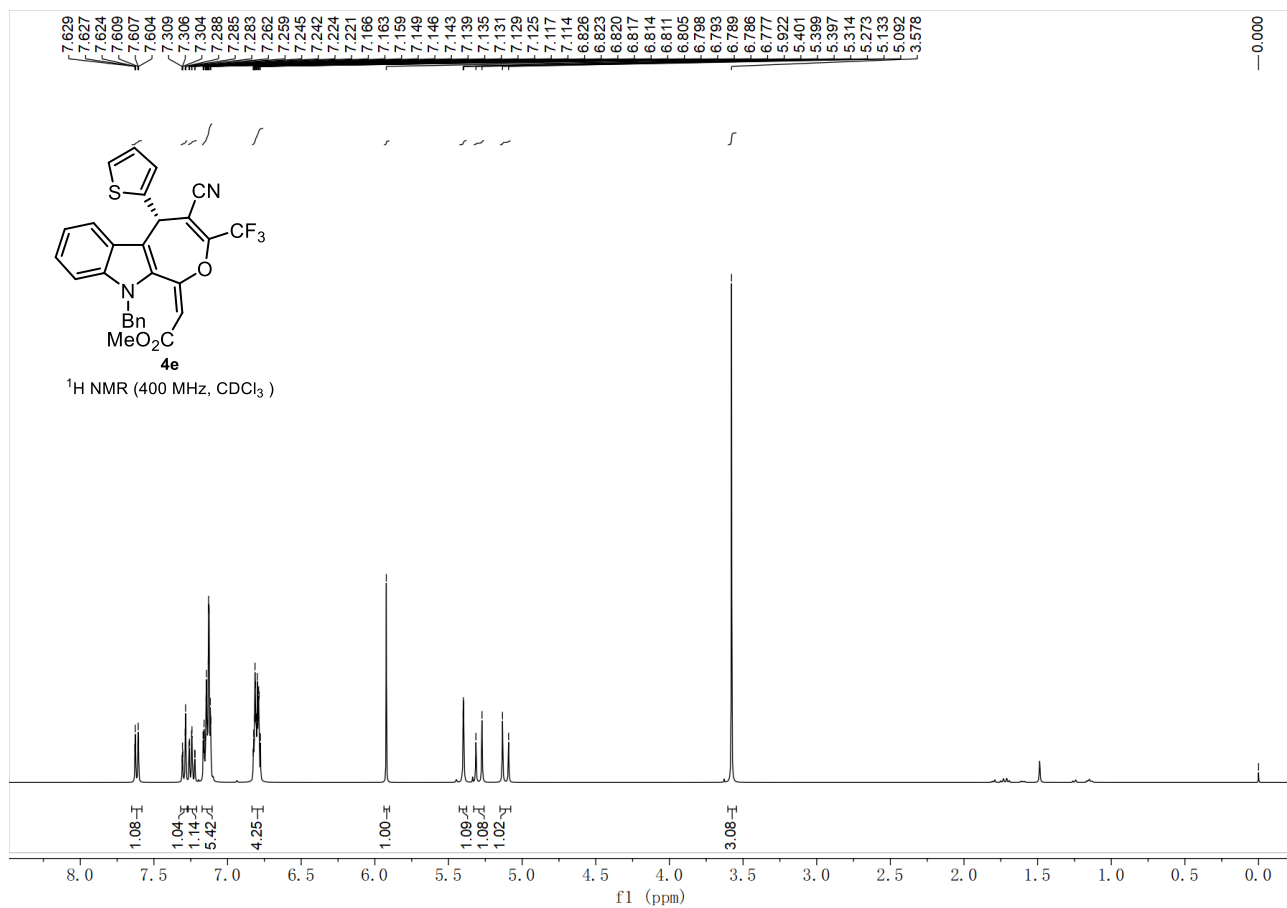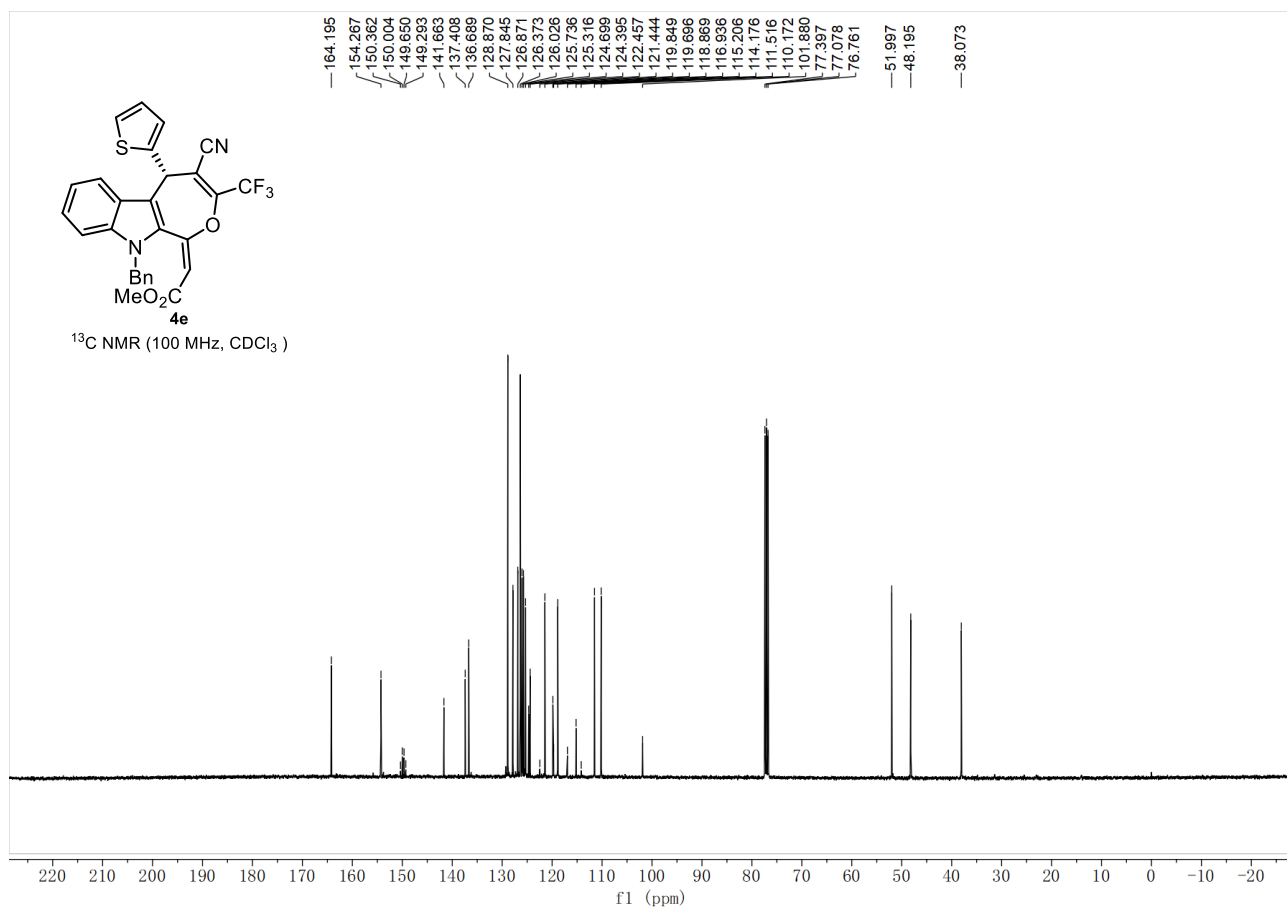

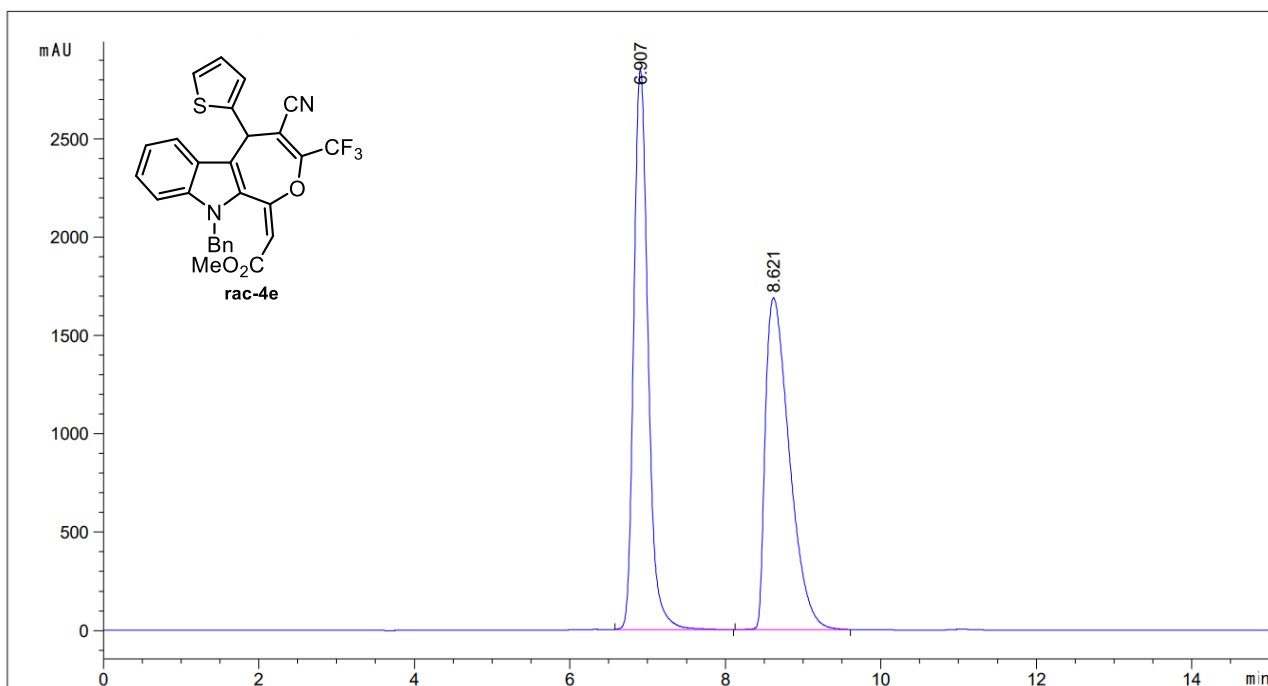

| Peak # | RetTime [min] | Type | Width [min] | Area mAU *s | Height [mAU] | Area %  |
|--------|---------------|------|-------------|-------------|--------------|---------|
| 1      | 6.907         | BB   | 0.1982      | 3.62914e4   | 2846.80493   | 50.0474 |
| 2      | 8.621         | BBA  | 0.3351      | 3.62226e4   | 1686.12524   | 49.9526 |

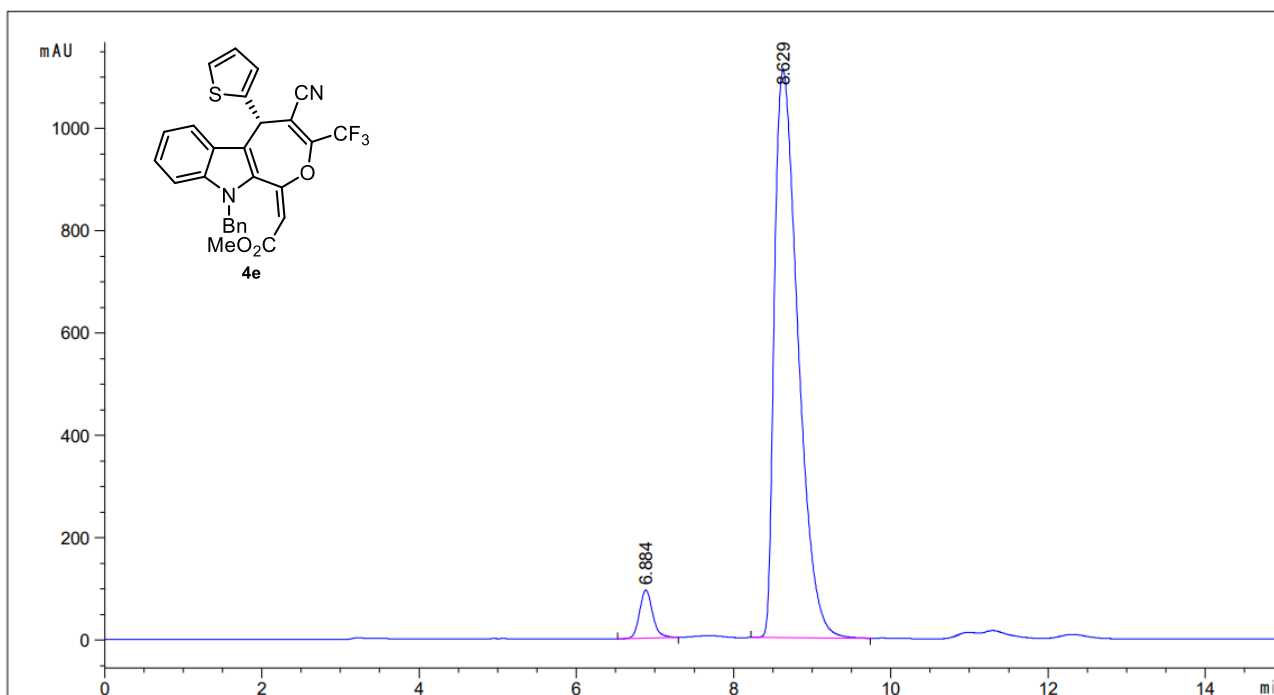

| Peak # | RetTime [min] | Type | Width [min] | Area mAU *s | Height [mAU] | Area %  |
|--------|---------------|------|-------------|-------------|--------------|---------|
| 1      | 6.884         | BB   | 0.1765      | 1081.65564  | 93.96207     | 4.4796  |
| 2      | 8.629         | BB   | 0.3242      | 2.30647e4   | 1108.77832   | 95.5204 |

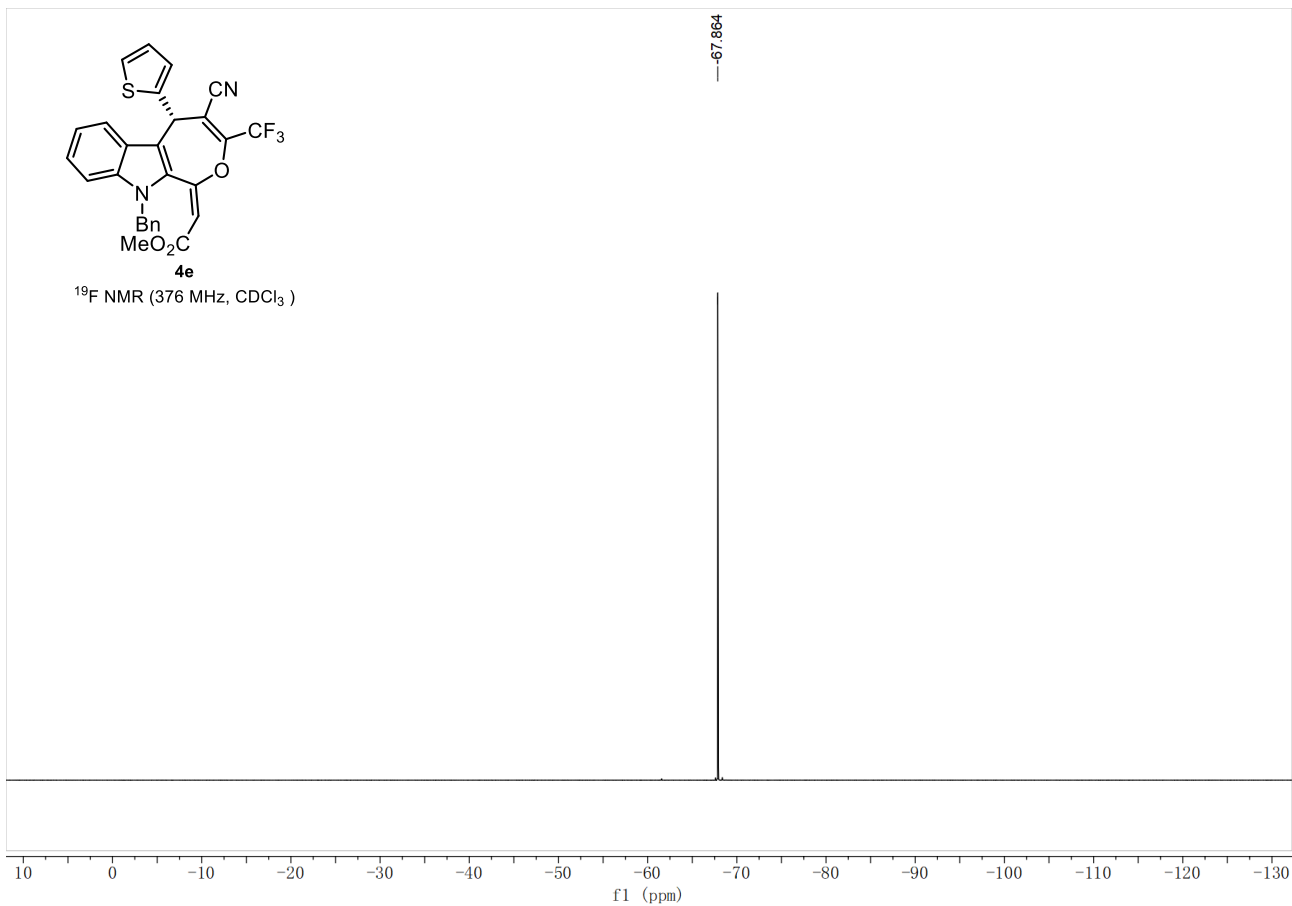

| Name           | CYC-230321-9   | Rack Pos.    | Instrument   | Instrument 1     | Operator                                            |
|----------------|----------------|--------------|--------------|------------------|-----------------------------------------------------|
| Inj. Vol. (ul) | 8              | Plate Pos.   | IRM Status   | Some ions missed |                                                     |
| Data File      | CYC-230321-9.d | Method (Acq) | CJH 230210.m | Comment          | Acq. Time (Local) 3/23/2023 12:29:42 PM (UTC+08:00) |

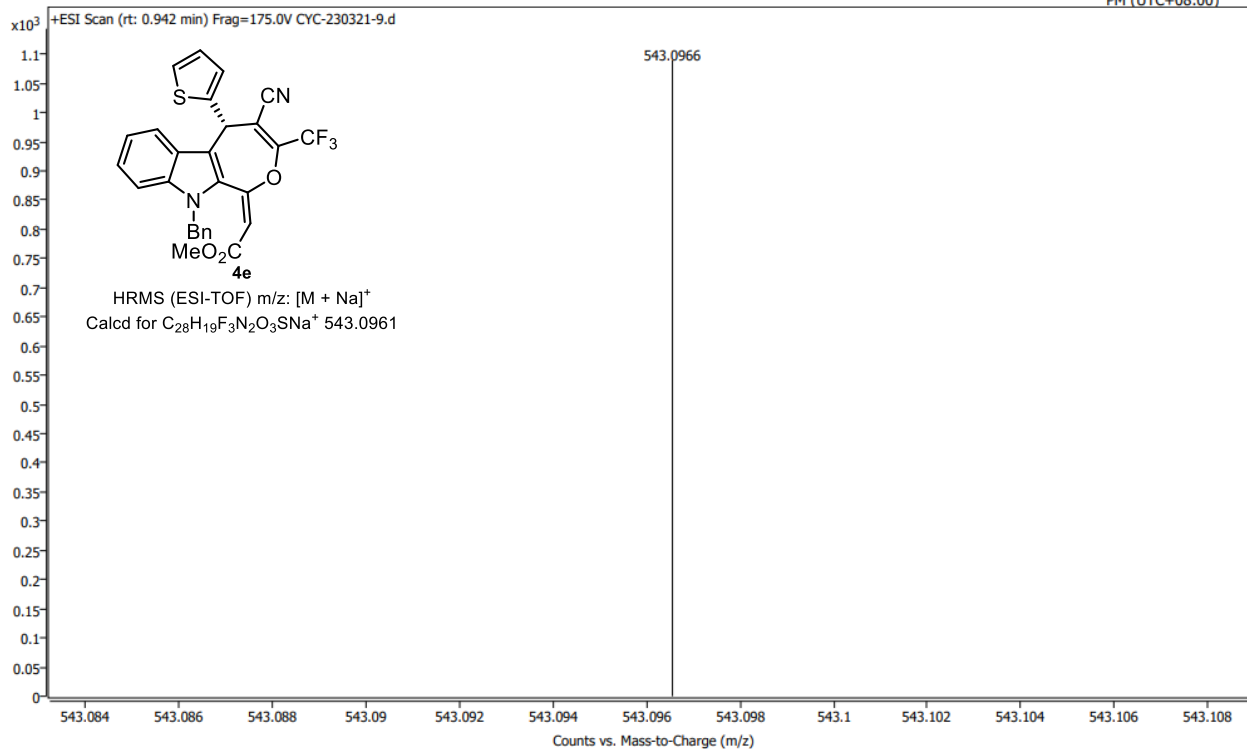

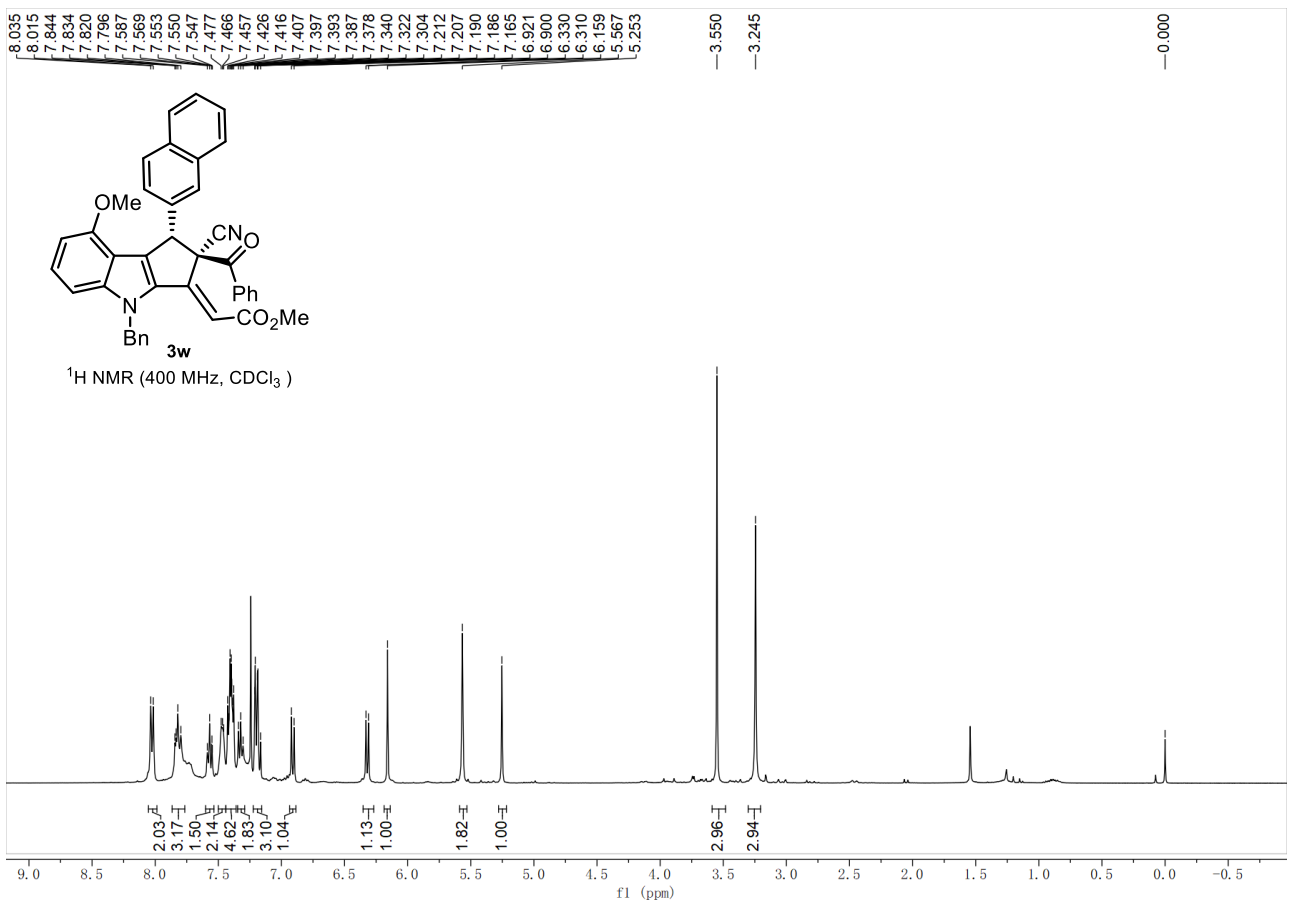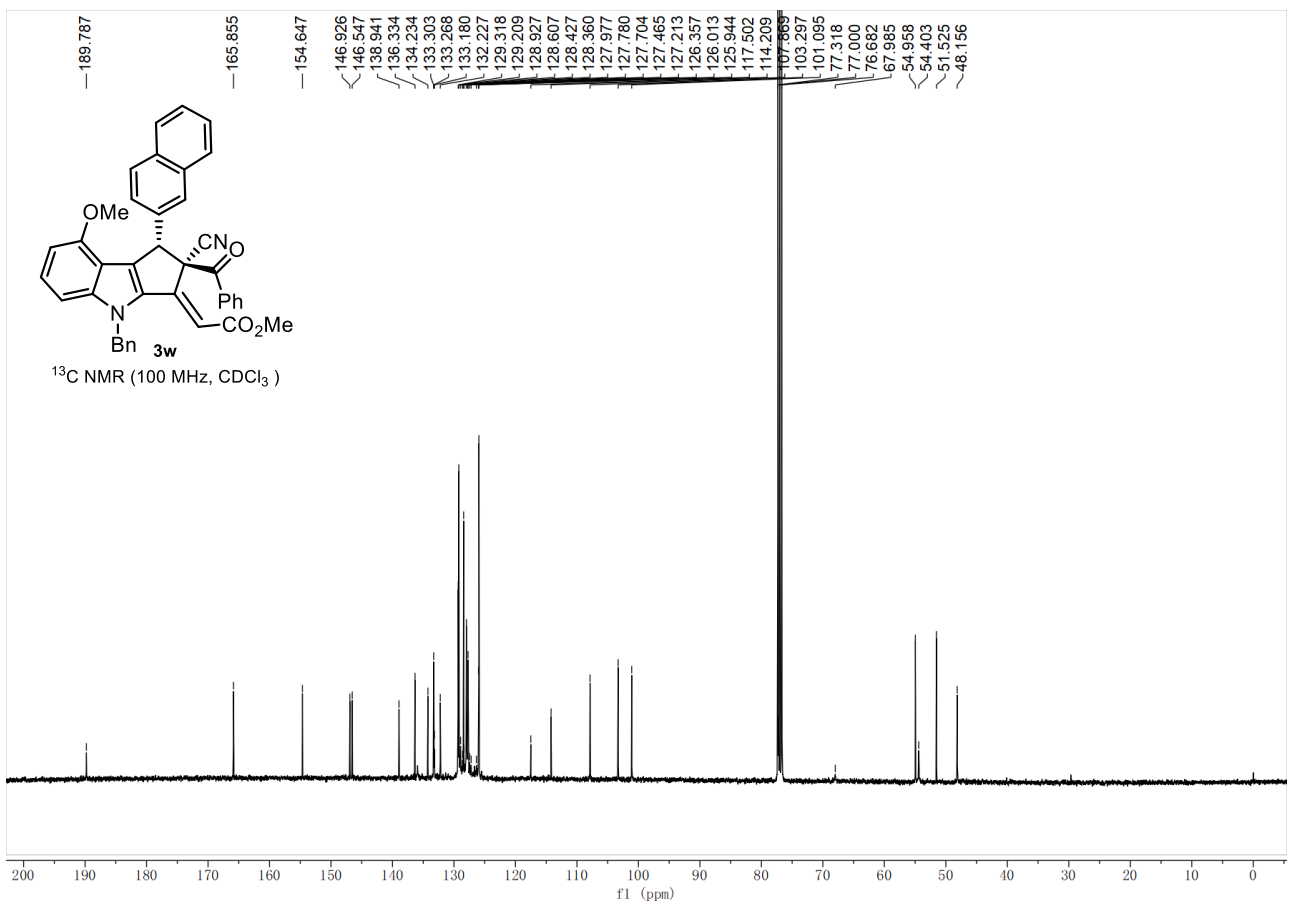

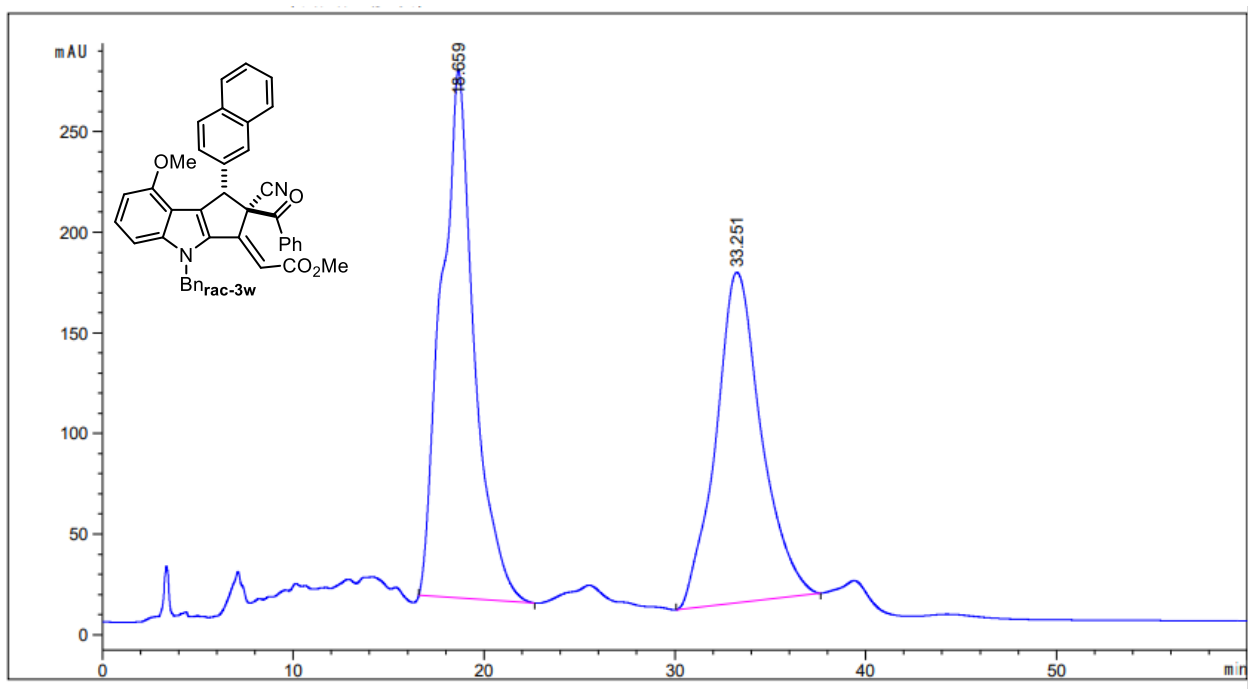

| # | [min]  | [min] | [mAU*s] | [mAU]     | %         |         |
|---|--------|-------|---------|-----------|-----------|---------|
| 1 | 18.659 | BBA   | 1.6107  | 3.14459e4 | 262.12656 | 53.5540 |
| 2 | 33.251 | BB    | 2.3815  | 2.72722e4 | 164.23045 | 46.4460 |

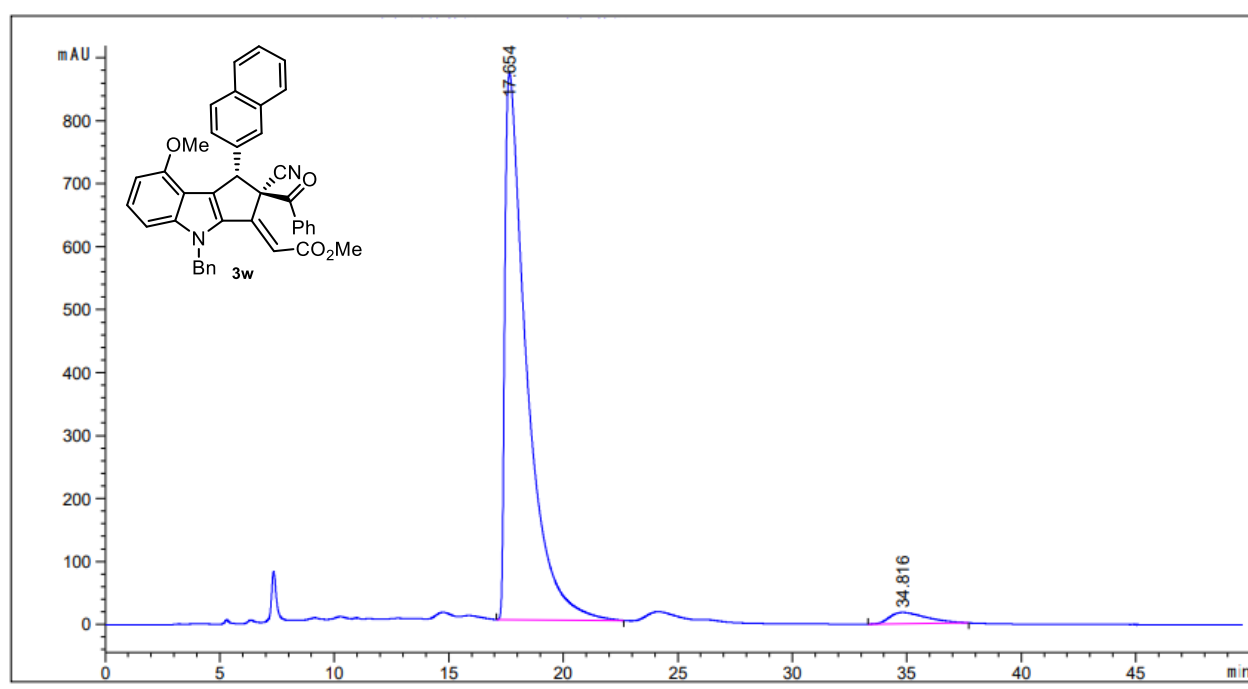

| # | [min]  | [min] | [mAU*s] | [mAU]      | %         |         |
|---|--------|-------|---------|------------|-----------|---------|
| 1 | 17.654 | BBA   | 0.9437  | 5.73497e4  | 868.43475 | 96.6236 |
| 2 | 34.816 | BBA   | 1.5441  | 2003.99097 | 17.87139  | 3.3764  |



|                |                 |              |                |            |              |                                     |
|----------------|-----------------|--------------|----------------|------------|--------------|-------------------------------------|
| Name           | CYC-220406-53   | Rack Pos.    |                | Instrument | Instrument 1 | Operator                            |
| Inj. Vol. (ul) | 8               | Plate Pos.   |                | IRM Status | Success      |                                     |
| Data File      | CYC-220406-53.d | Method (Acq) | ZYJ-20201106.m | Comment    |              | Acq. Time (Local)                   |
|                |                 |              |                |            |              | 4/9/2022 11:42:00 AM<br>(UTC+08:00) |

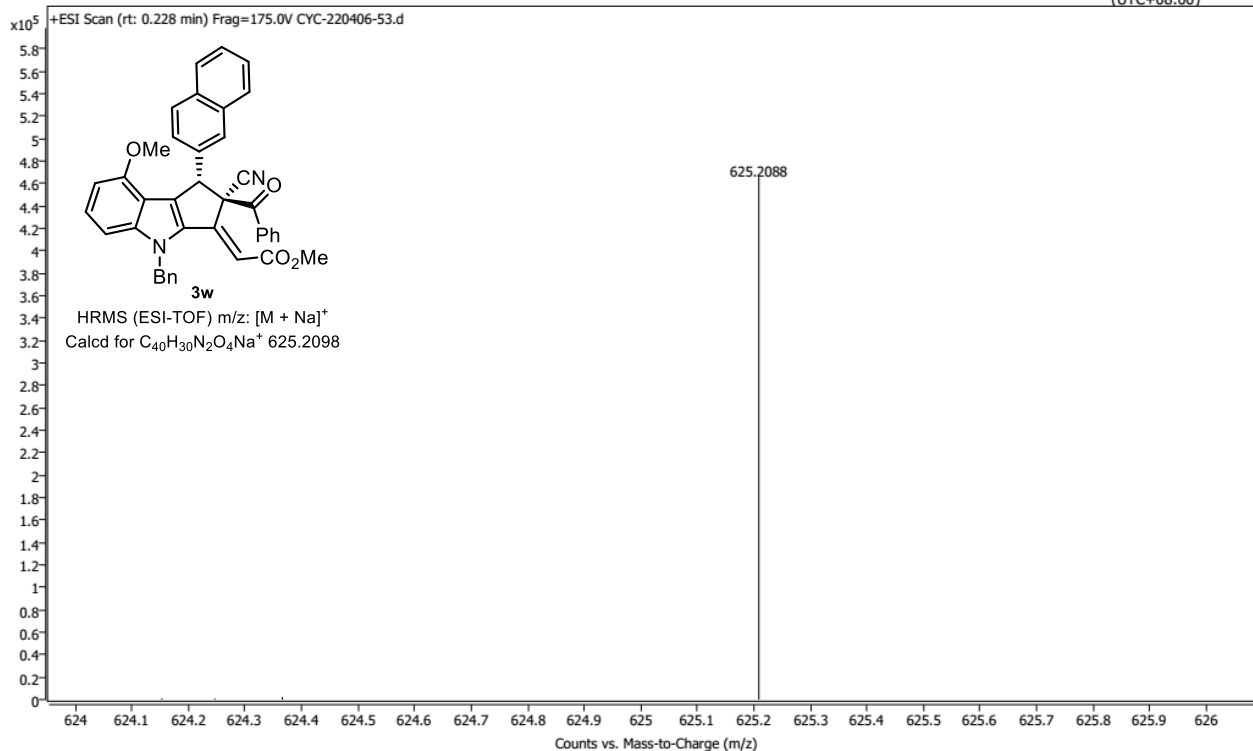

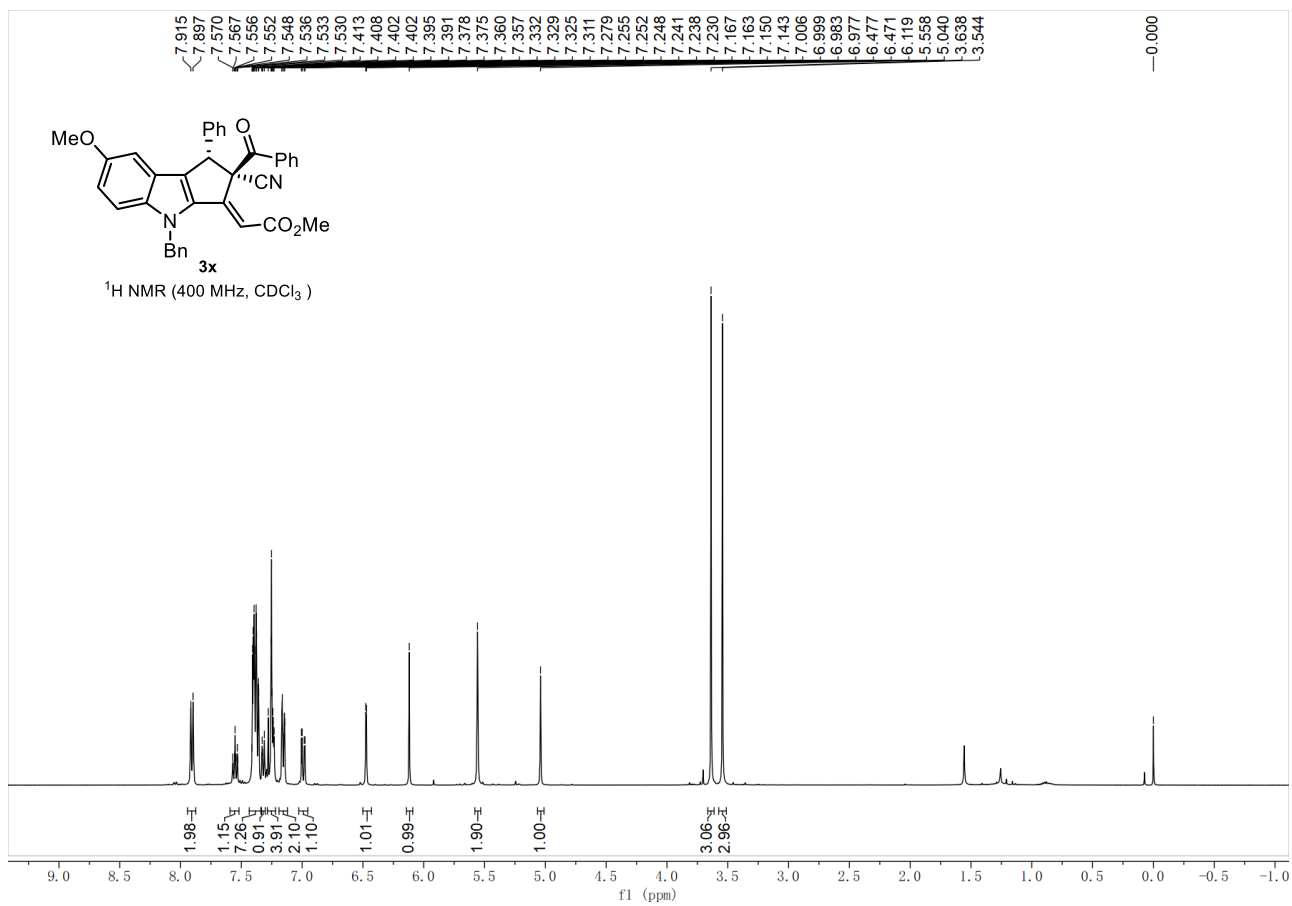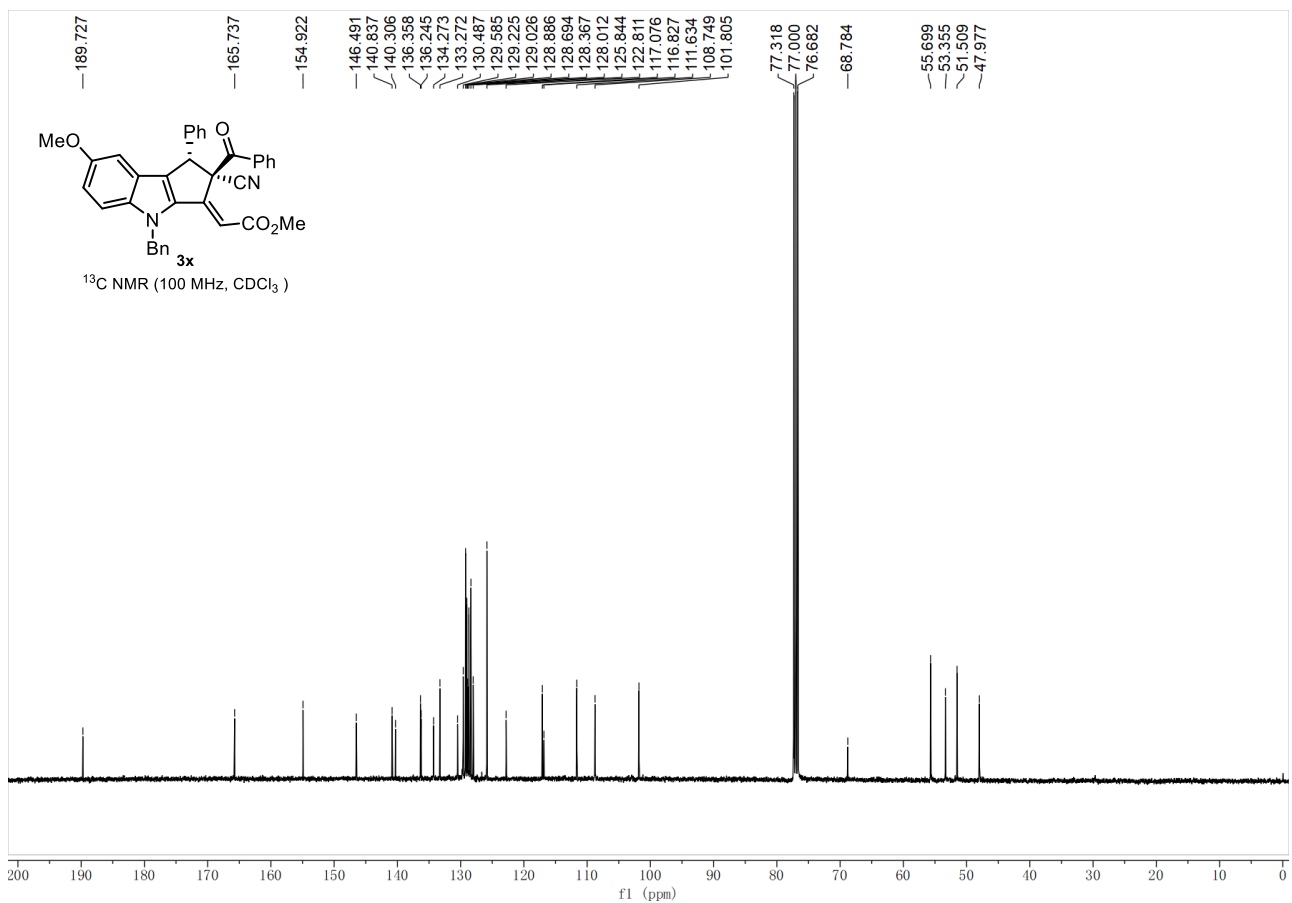

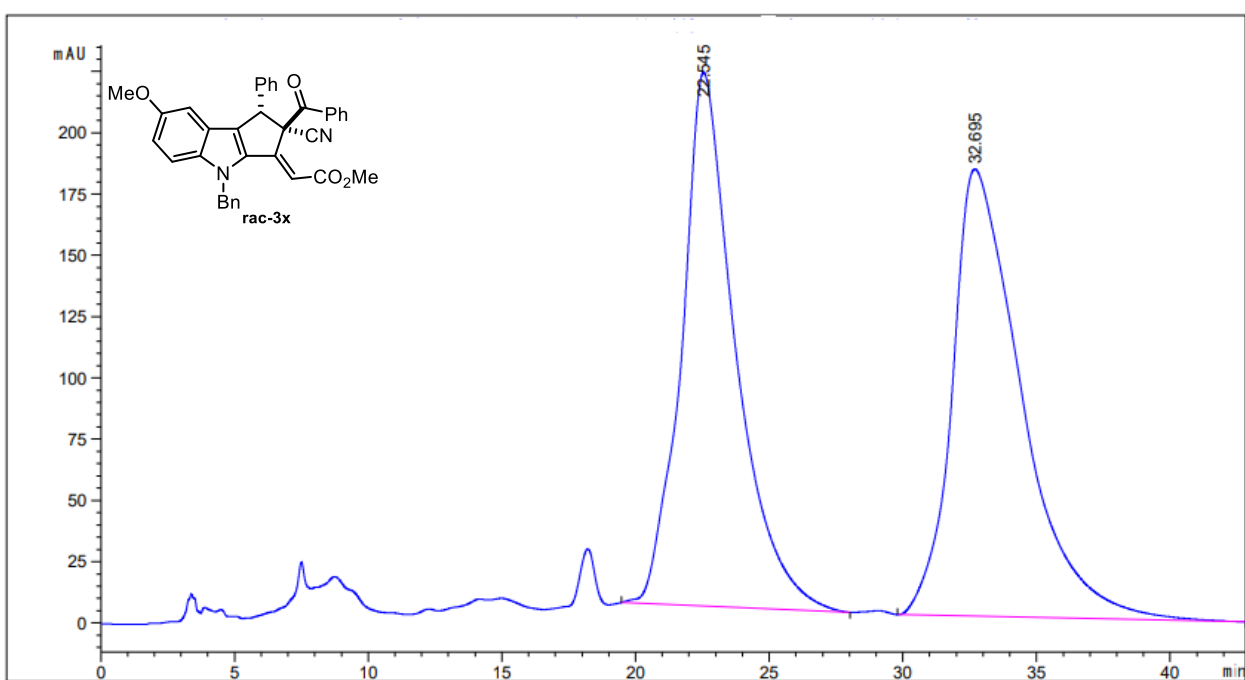

| # | [min]  | [min] | [mAU*s] | [mAU]     | %         |         |
|---|--------|-------|---------|-----------|-----------|---------|
| 1 | 22.545 | BB    | 1.9922  | 3.04902e4 | 217.69656 | 48.1512 |
| 2 | 32.695 | BBA   | 2.7024  | 3.28316e4 | 182.42897 | 51.8488 |

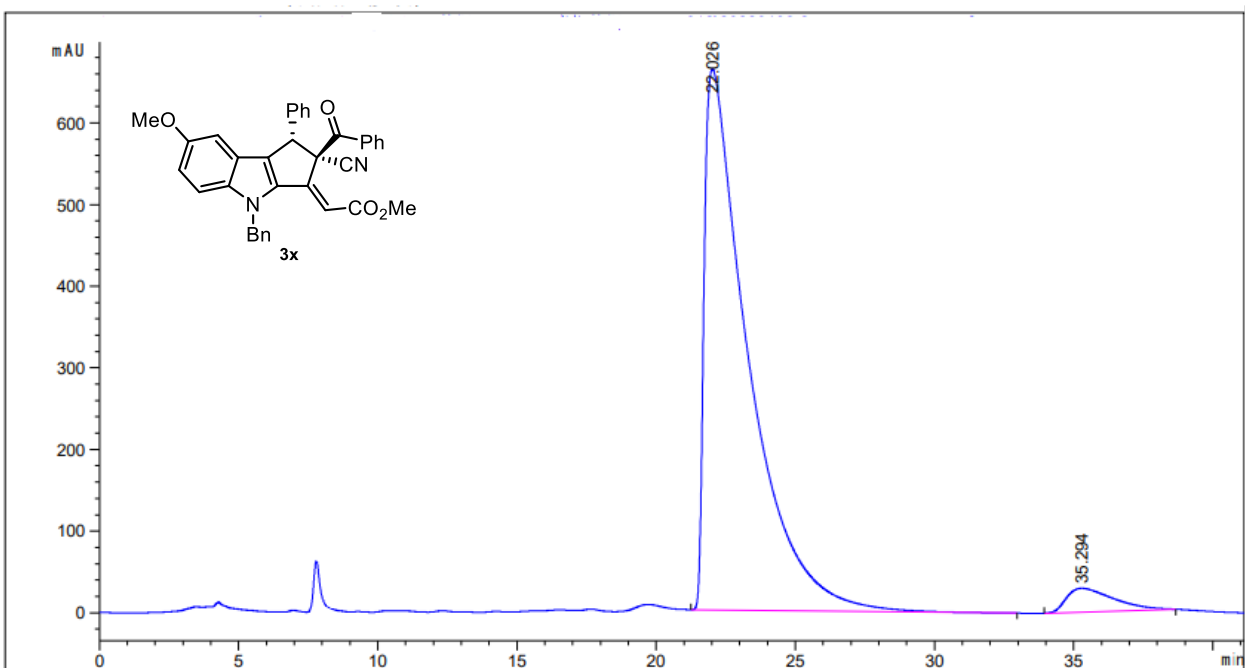

| # | [min]  | [min] | [mAU*s] | [mAU]      | %         |         |
|---|--------|-------|---------|------------|-----------|---------|
| 1 | 22.026 | BB    | 1.5326  | 7.26656e4  | 662.73047 | 95.5206 |
| 2 | 35.294 | BBA   | 1.7566  | 3407.63232 | 29.09478  | 4.4794  |

|                |                 |              |                |            |              |                   |                      |
|----------------|-----------------|--------------|----------------|------------|--------------|-------------------|----------------------|
| Name           | CYC-220406-48   | Rack Pos.    |                | Instrument | Instrument 1 | Operator          |                      |
| Inj. Vol. (ul) | 8               | Plate Pos.   |                | IRM Status | Success      | Acq. Time (Local) | 4/9/2022 11:24:46 AM |
| Data File      | CYC-220406-48.d | Method (Acq) | ZYJ-20201106.m | Comment    |              | (UTC+08:00)       |                      |

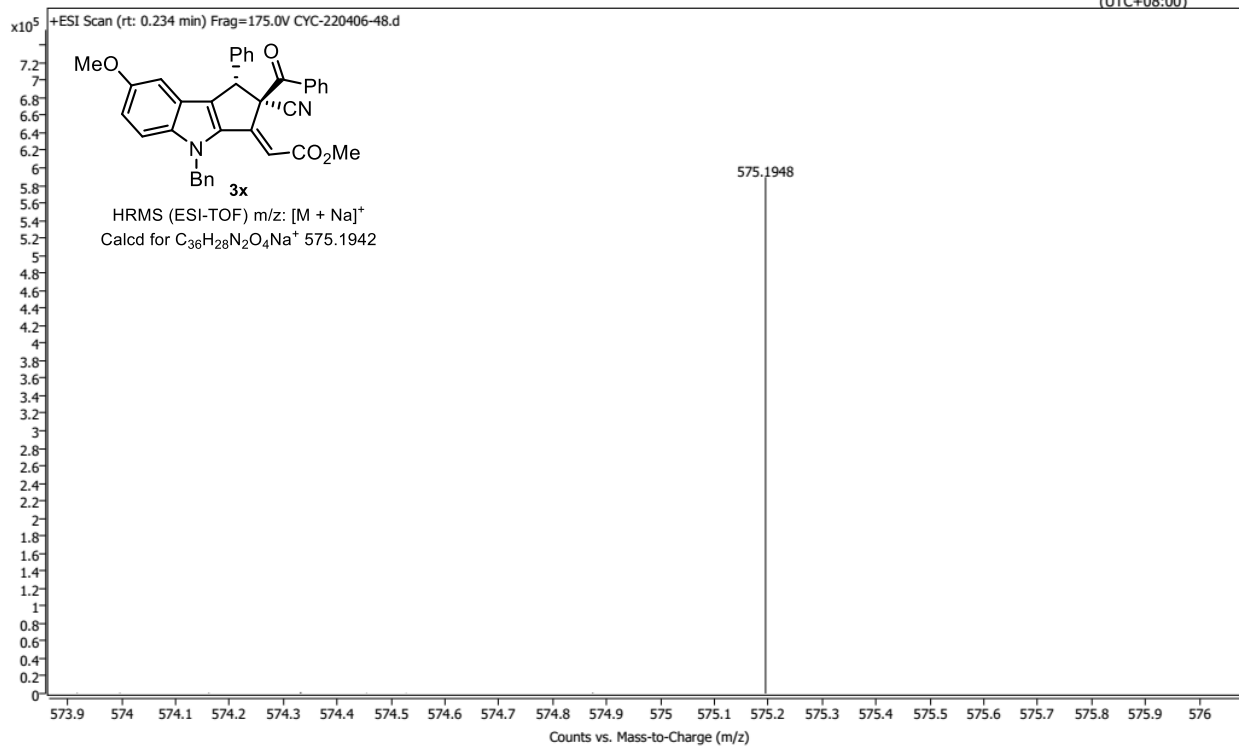

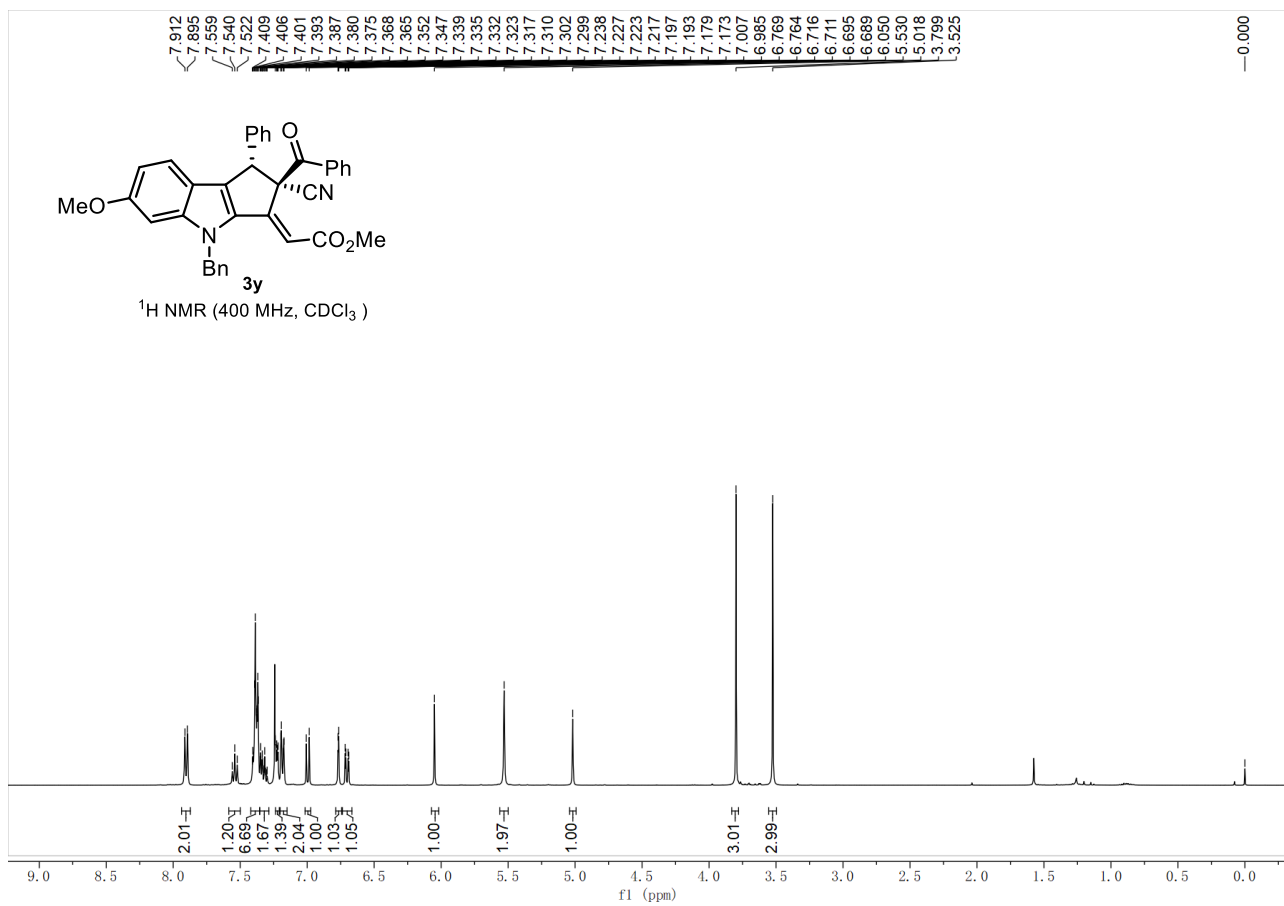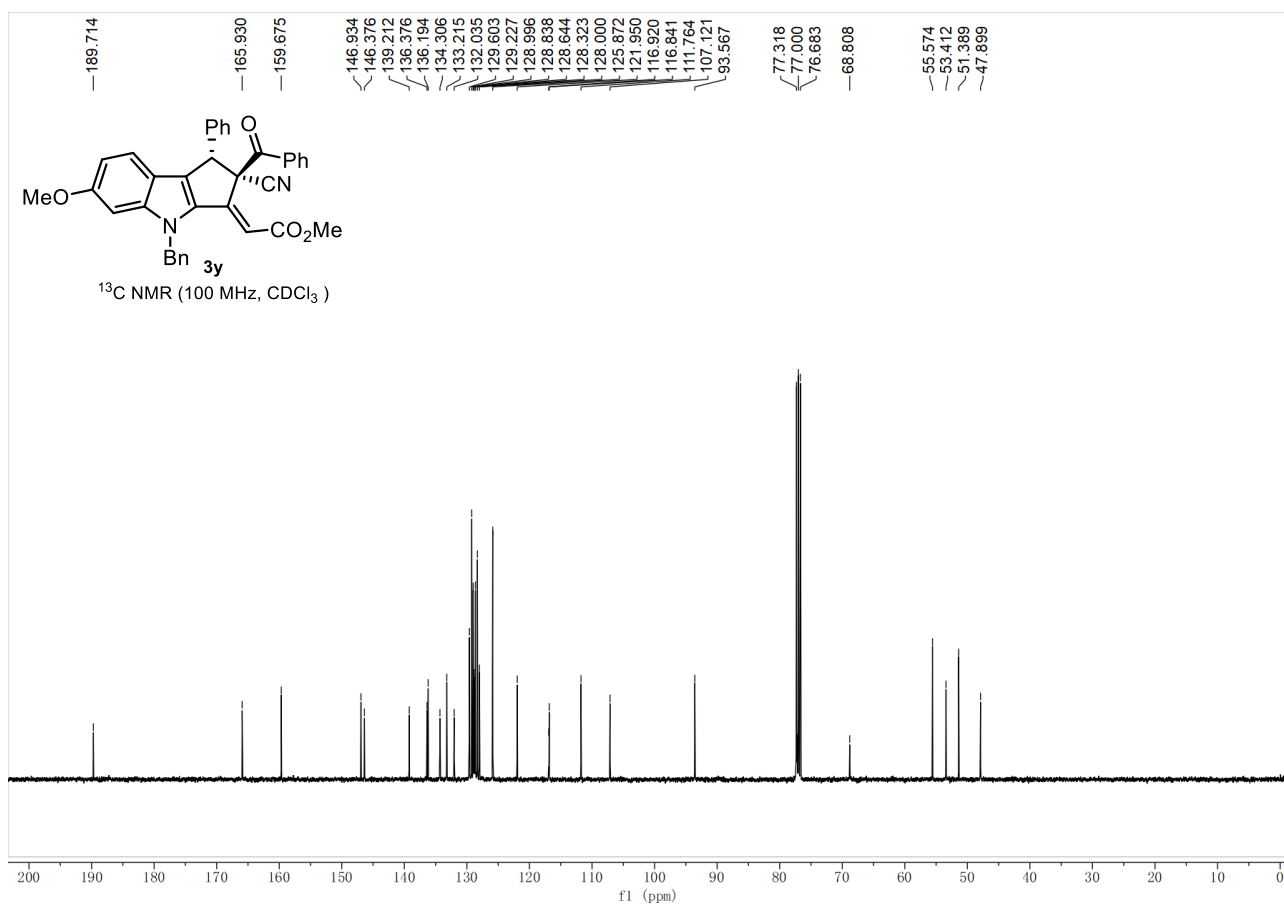

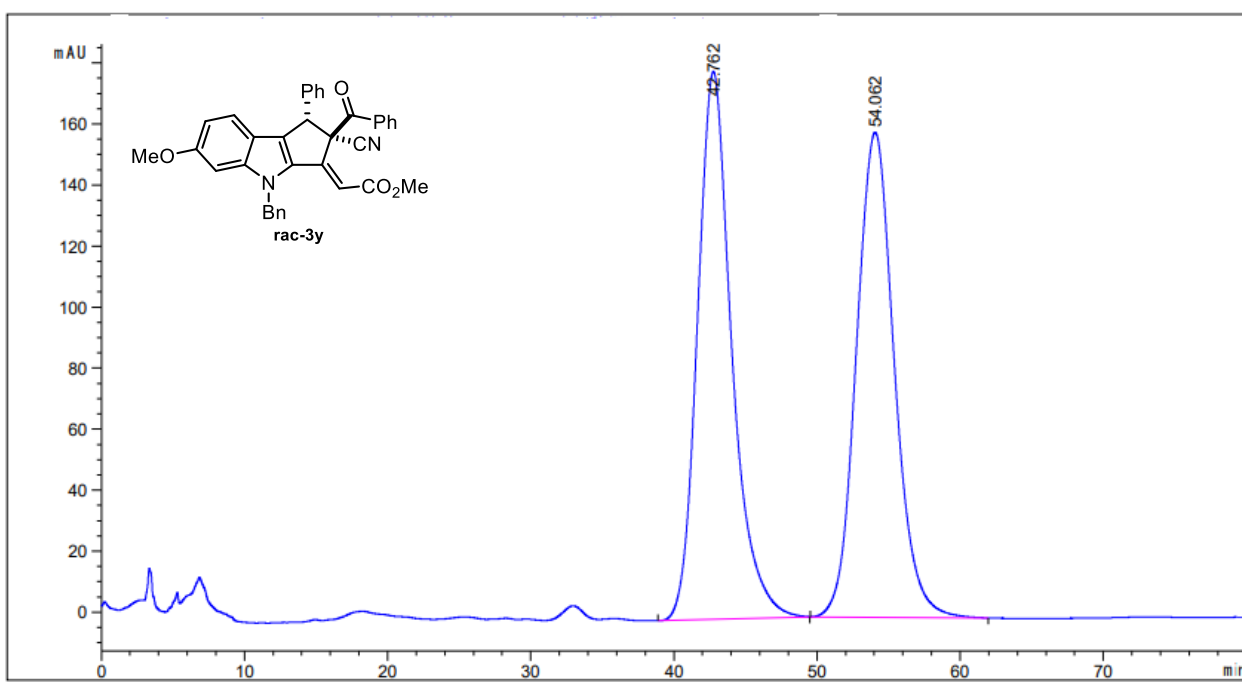

| # | [min]  | [min] | [mAU*s] | [mAU]     | %         |         |
|---|--------|-------|---------|-----------|-----------|---------|
| 1 | 42.762 | BB    | 2.5239  | 2.97878e4 | 179.53484 | 50.5523 |
| 2 | 54.062 | BBA   | 2.8670  | 2.91369e4 | 158.92183 | 49.4477 |

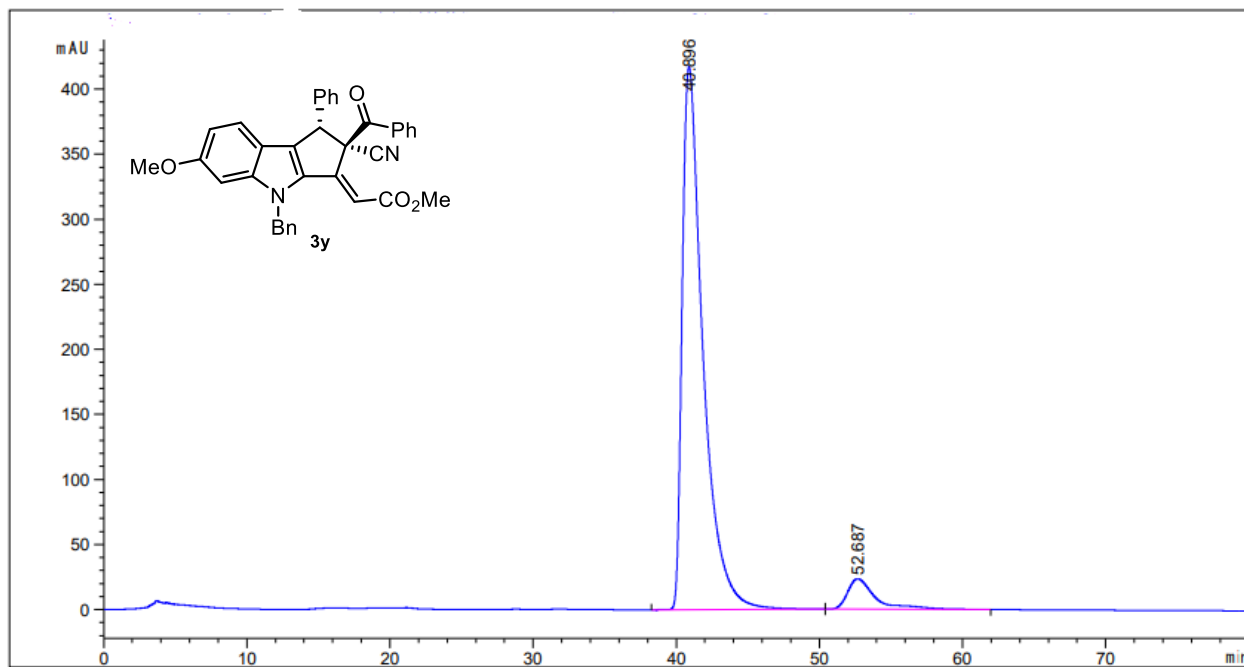

| # | [min]  | [min] | [mAU*s] | [mAU]      | %         |         |
|---|--------|-------|---------|------------|-----------|---------|
| 1 | 40.896 | BB    | 1.4904  | 4.20676e4  | 417.38489 | 92.9689 |
| 2 | 52.687 | BBA   | 2.0008  | 3181.49878 | 23.34082  | 7.0311  |

|                |                 |              |                |            |                  |                   |                      |
|----------------|-----------------|--------------|----------------|------------|------------------|-------------------|----------------------|
| Name           | CYC-220406-49   | Rack Pos.    |                | Instrument | Instrument 1     | Operator          |                      |
| Inj. Vol. (ul) | 8               | Plate Pos.   |                | IRM Status | Some ions missed | Acq. Time (Local) | 4/9/2022 11:27:44 AM |
| Data File      | CYC-220406-49.d | Method (Acq) | ZYJ-20201106.m | Comment    |                  |                   | (UTC+08:00)          |

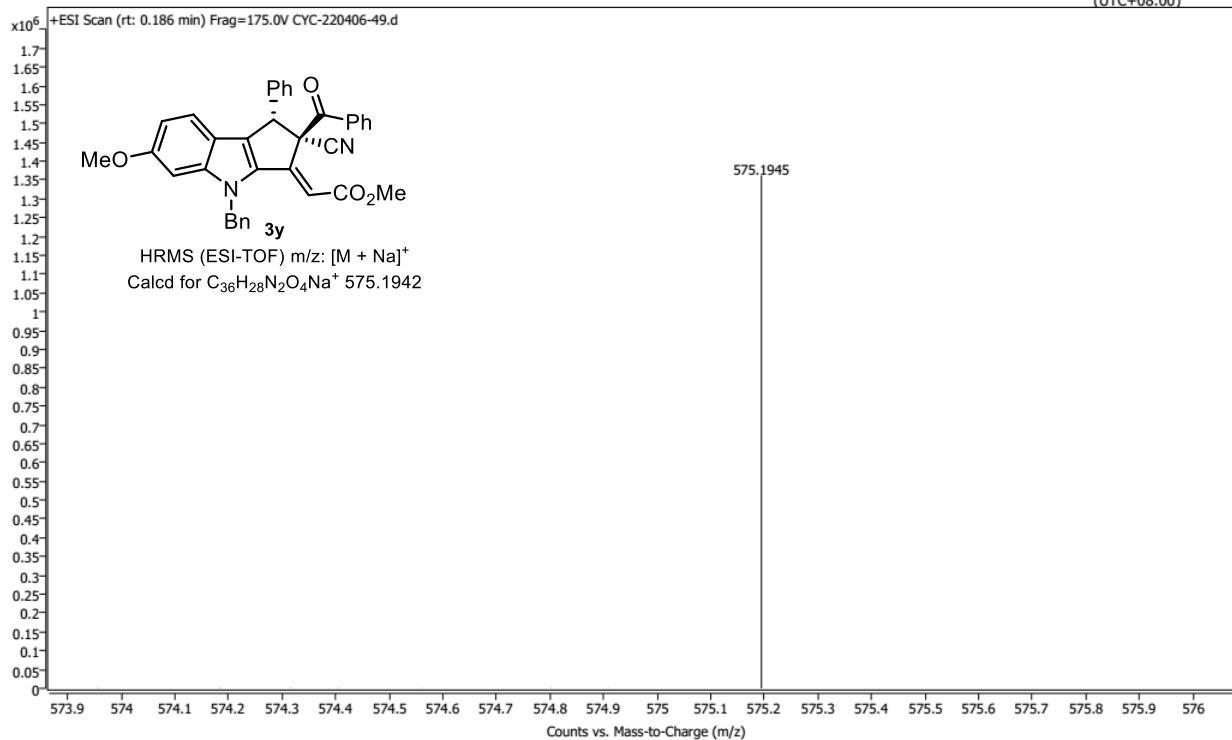

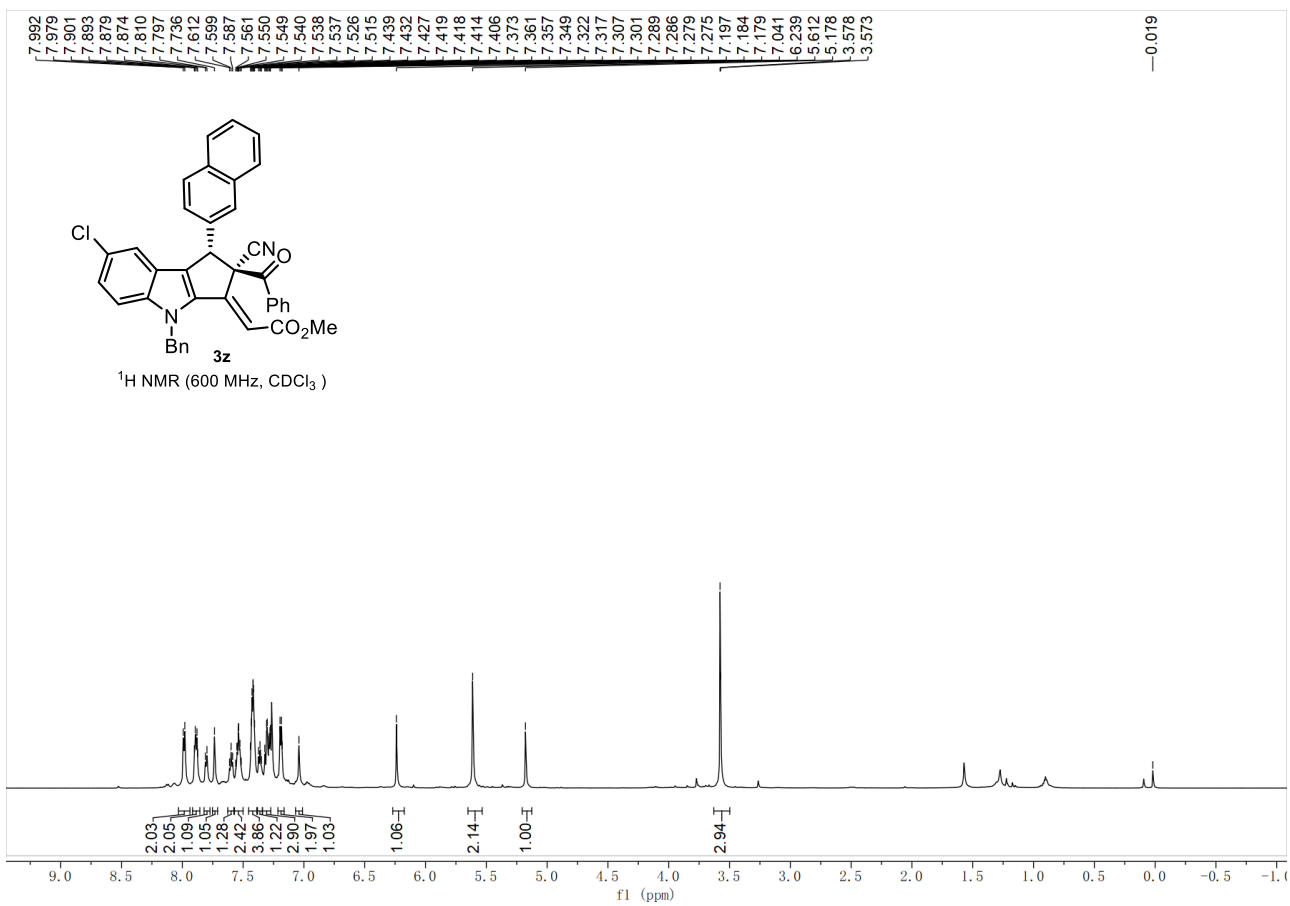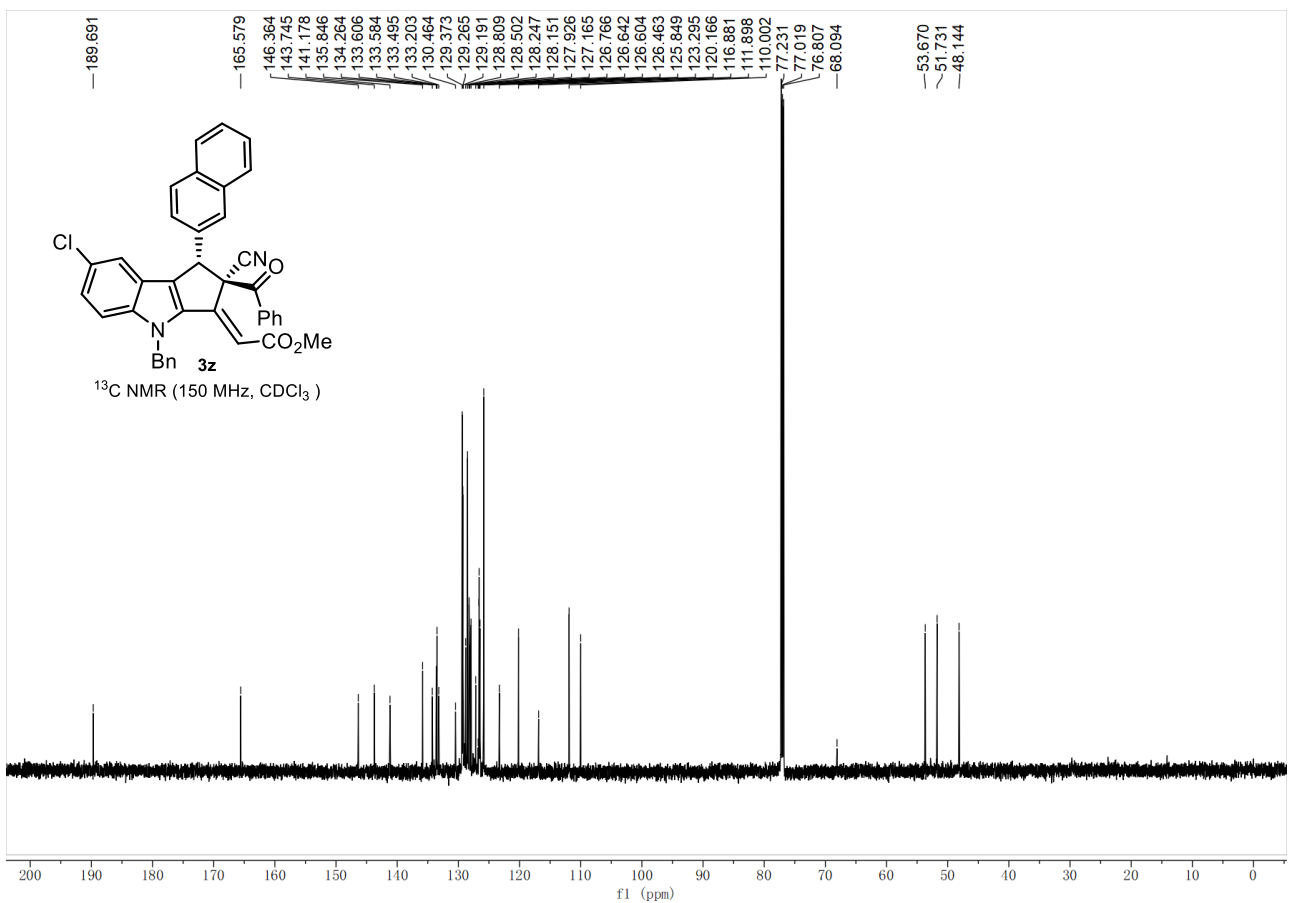



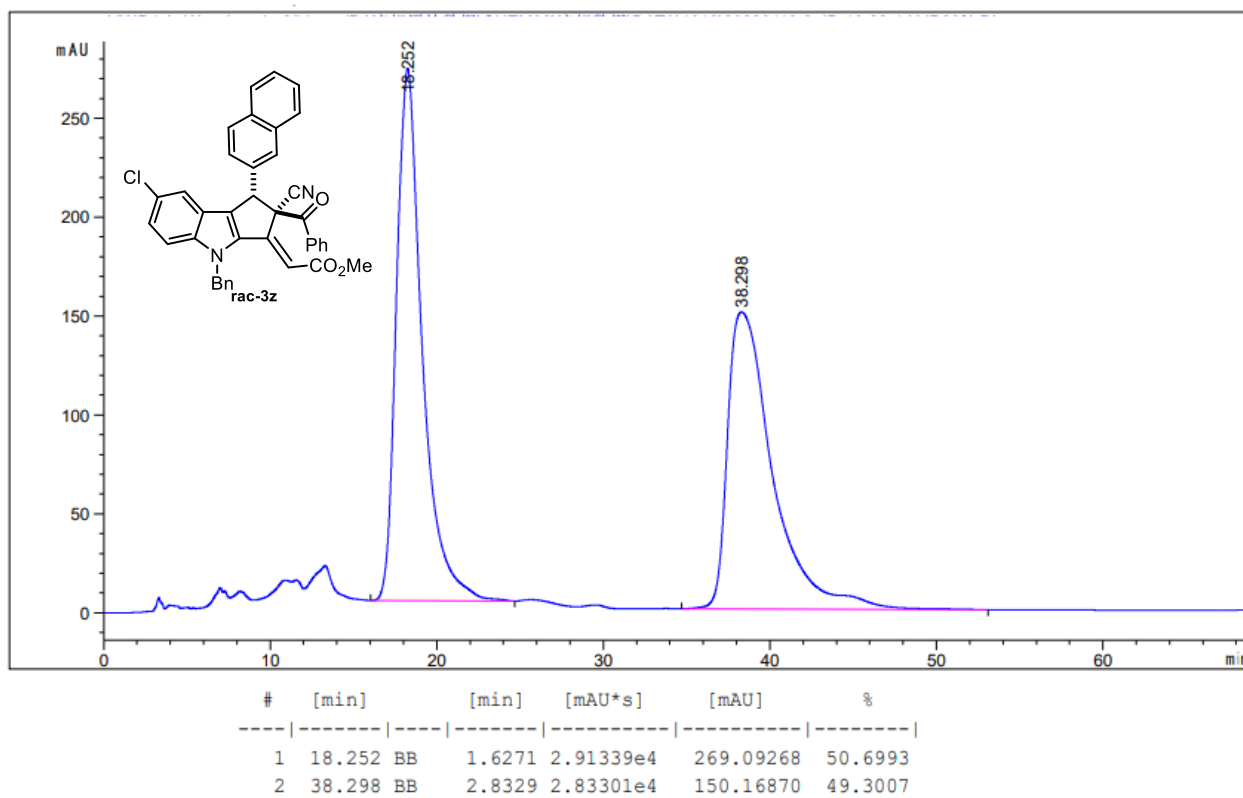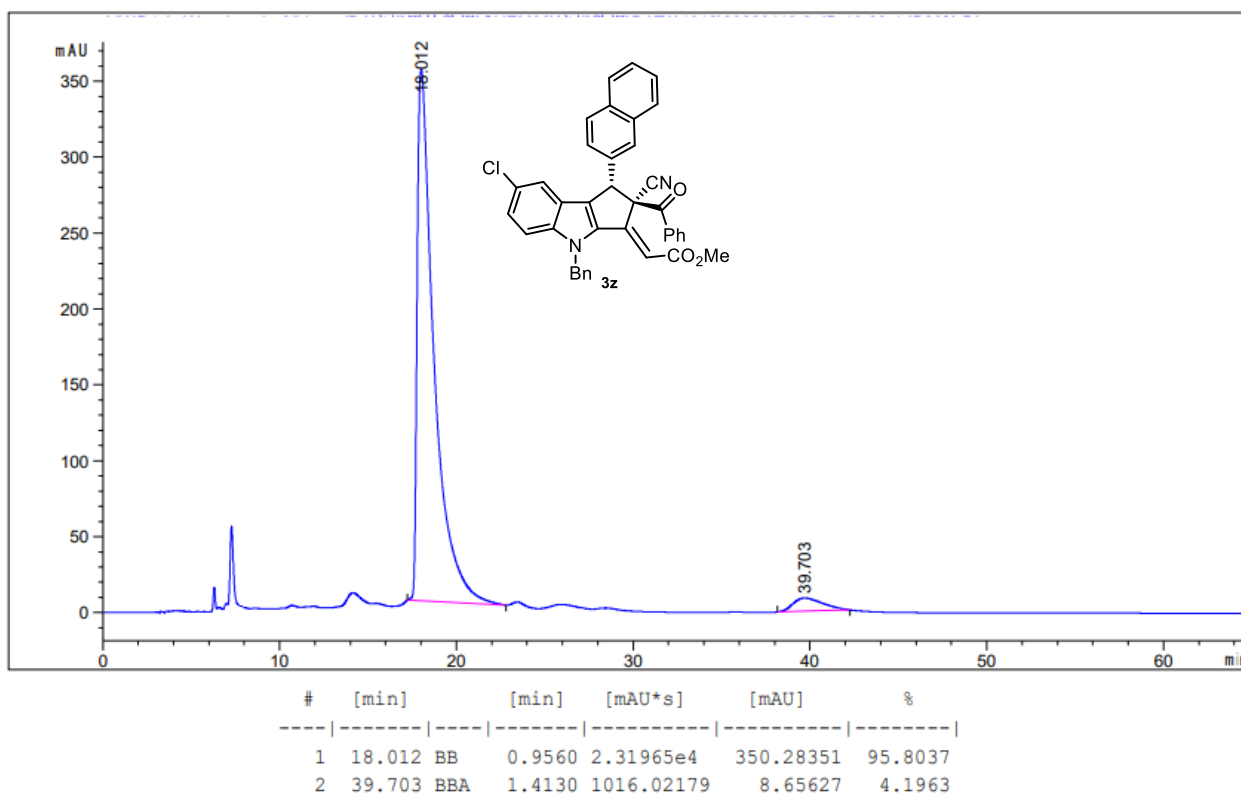

Name: CYC-220406-51      Rack Pos.:  
Inj. Vol. (ul): 8      Plate Pos.:  
Data File: CYC-220406-51.d      Method (Acq): ZYJ-20201106.m      Instrument: ZYJ-20201106.m      Instrument 1: Success      Operator: Success  
Acq. Time (Local): 4/9/2022 11:33:38 AM  
(UTC+08:00)

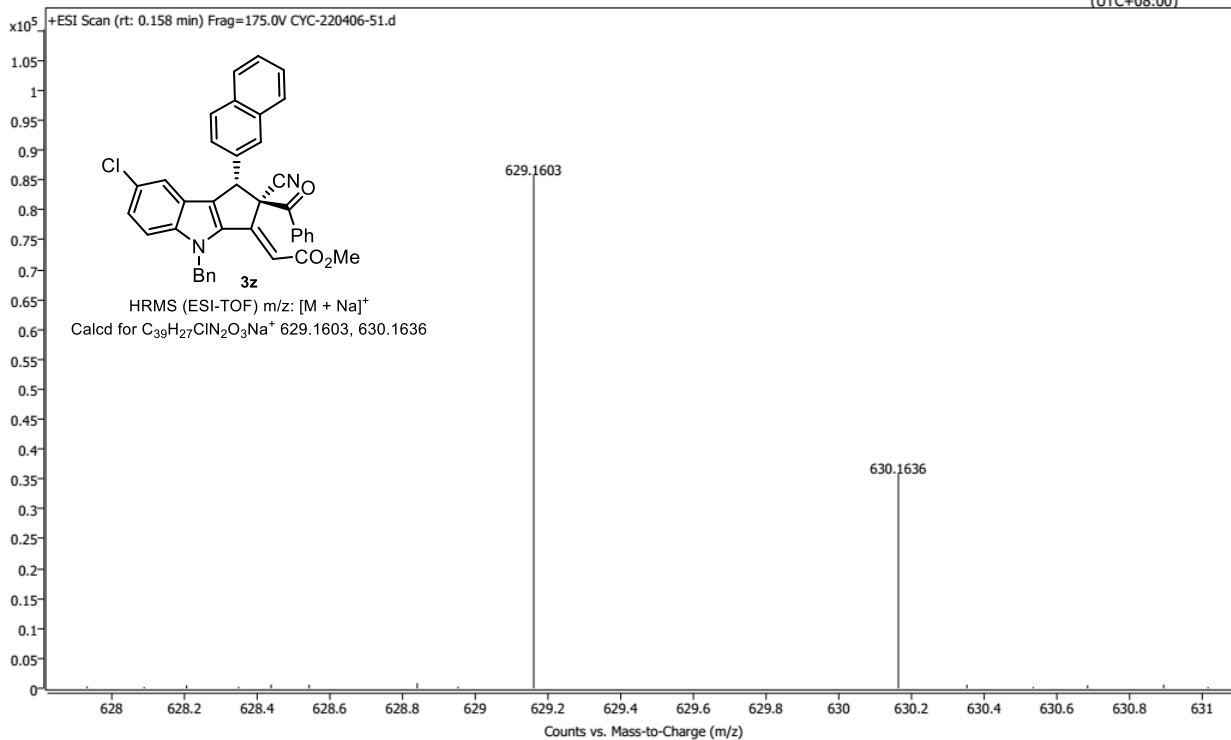

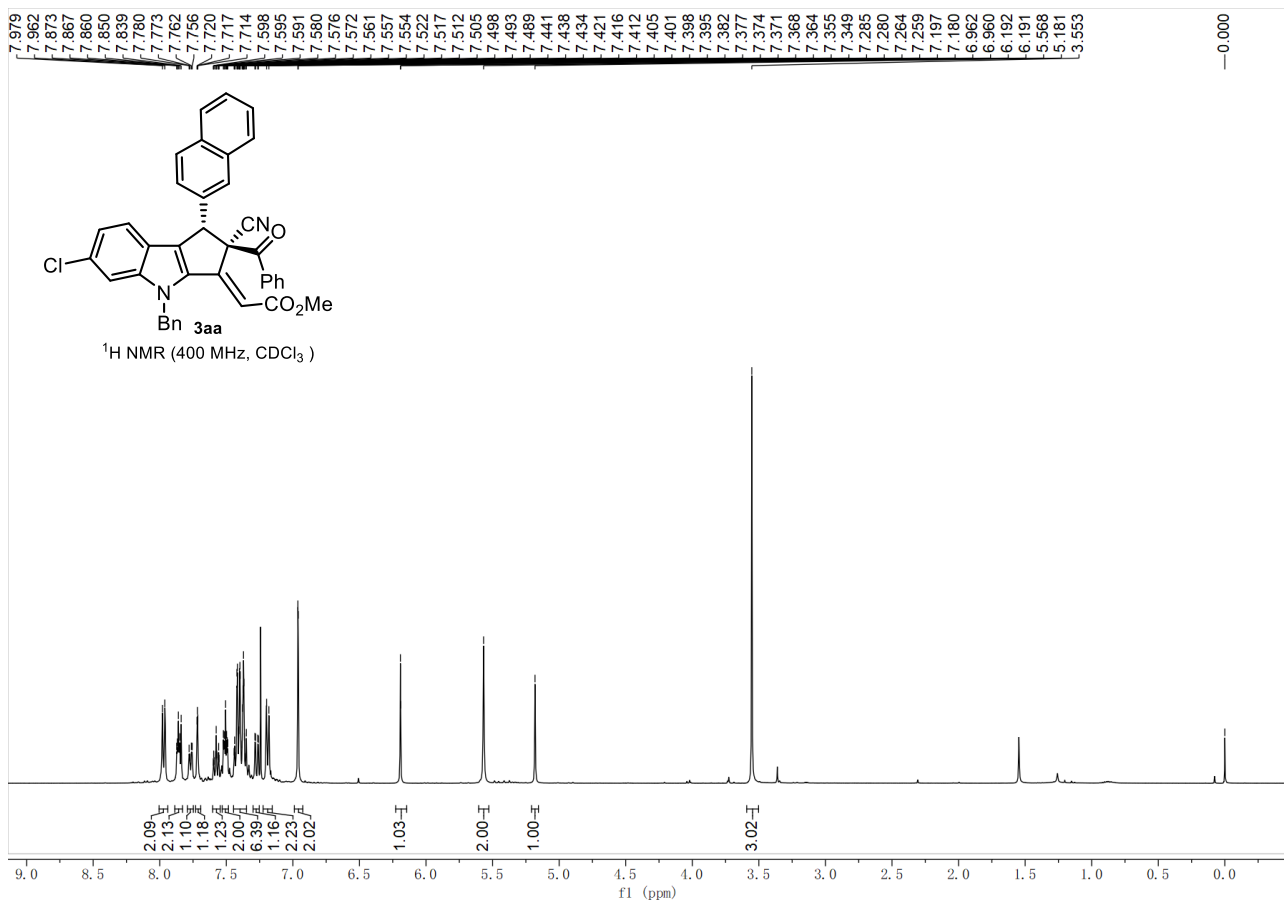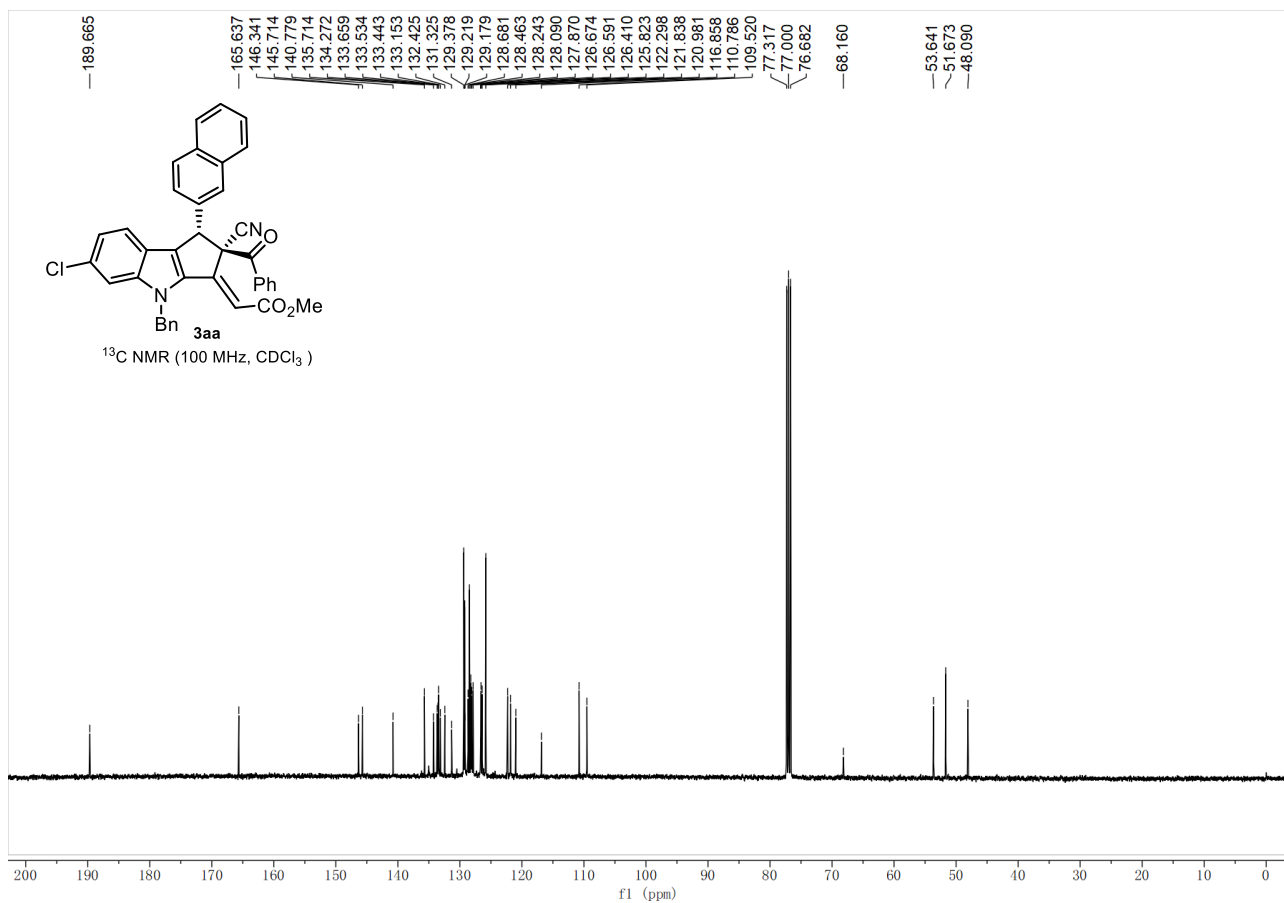

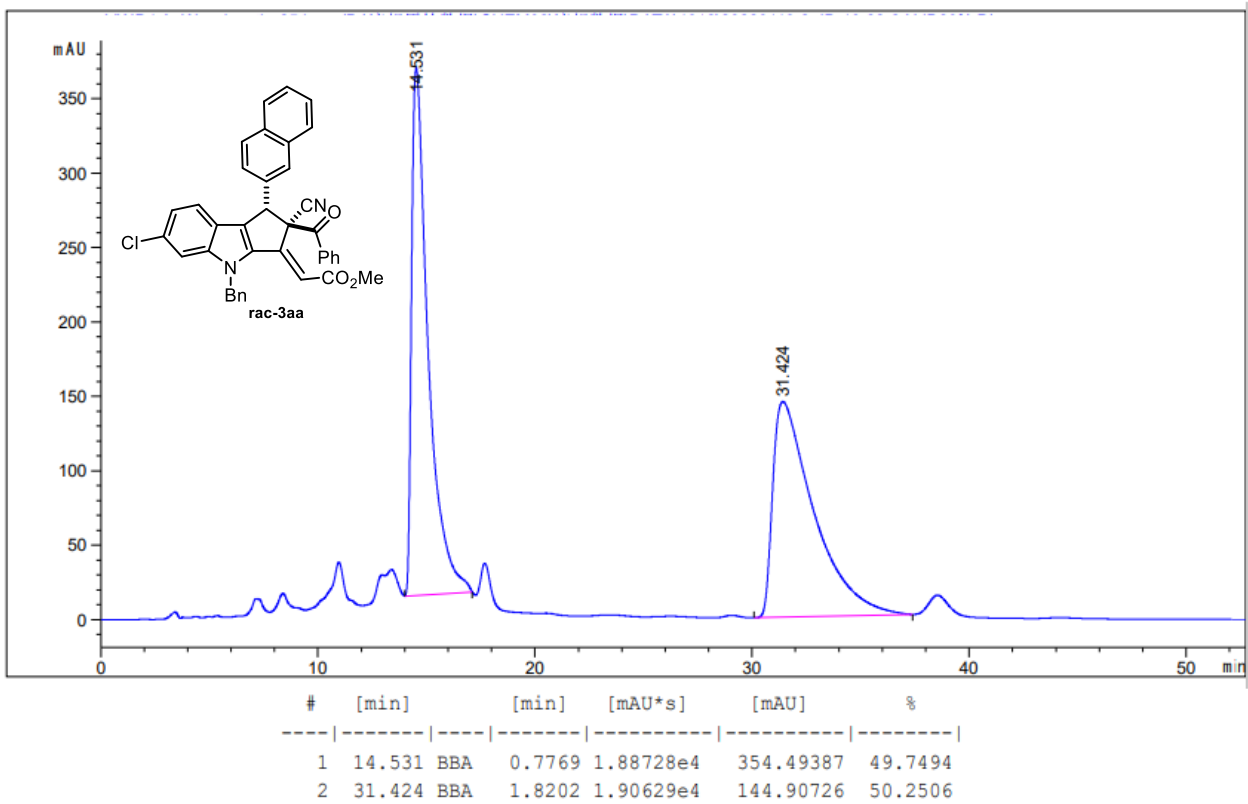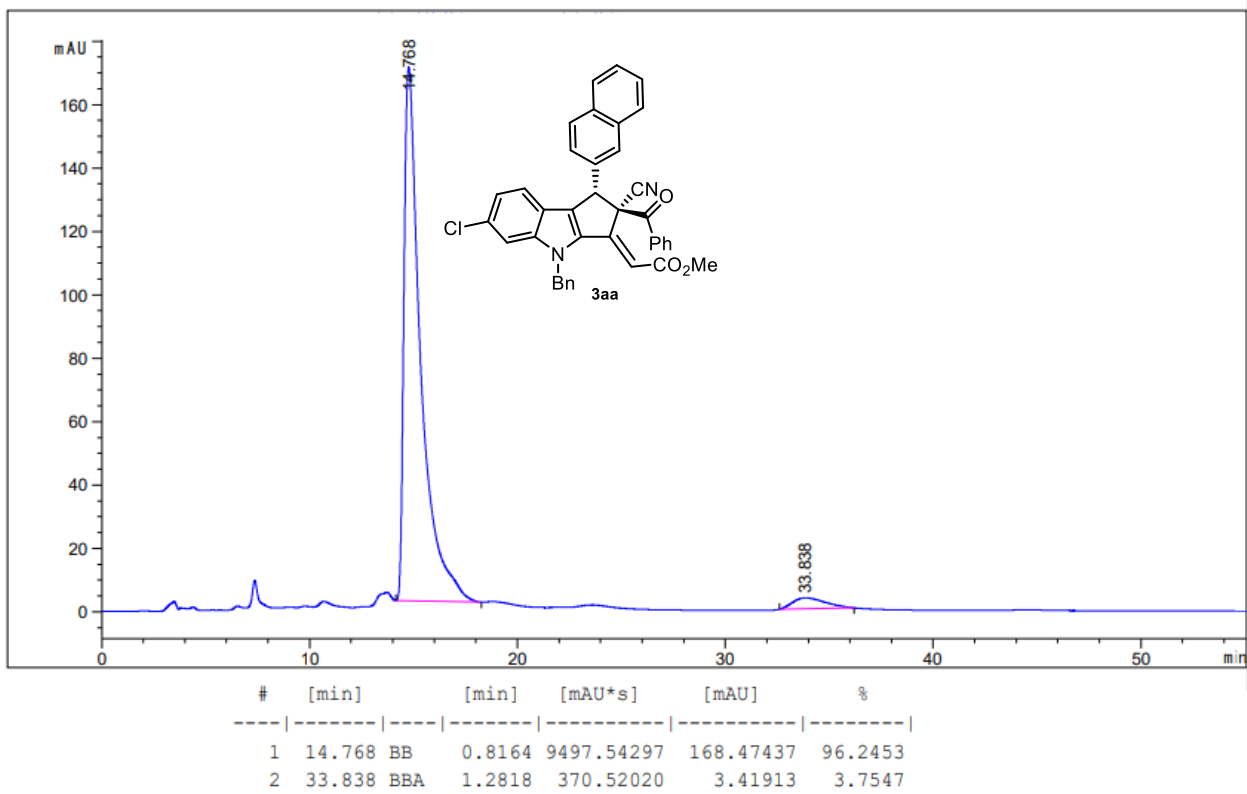

|                |                 |              |                |            |              |                                                    |
|----------------|-----------------|--------------|----------------|------------|--------------|----------------------------------------------------|
| Name           | CYC-220406-52   | Rack Pos.    |                | Instrument | Instrument 1 | Operator                                           |
| Inj. Vol. (ul) | 8               | Plate Pos.   |                | IRM Status | Success      |                                                    |
| Data File      | CYC-220406-52.d | Method (Acq) | ZYJ-20201106.m | Comment    |              | Acq. Time (Local) 4/9/2022 11:36:35 AM (UTC+08:00) |

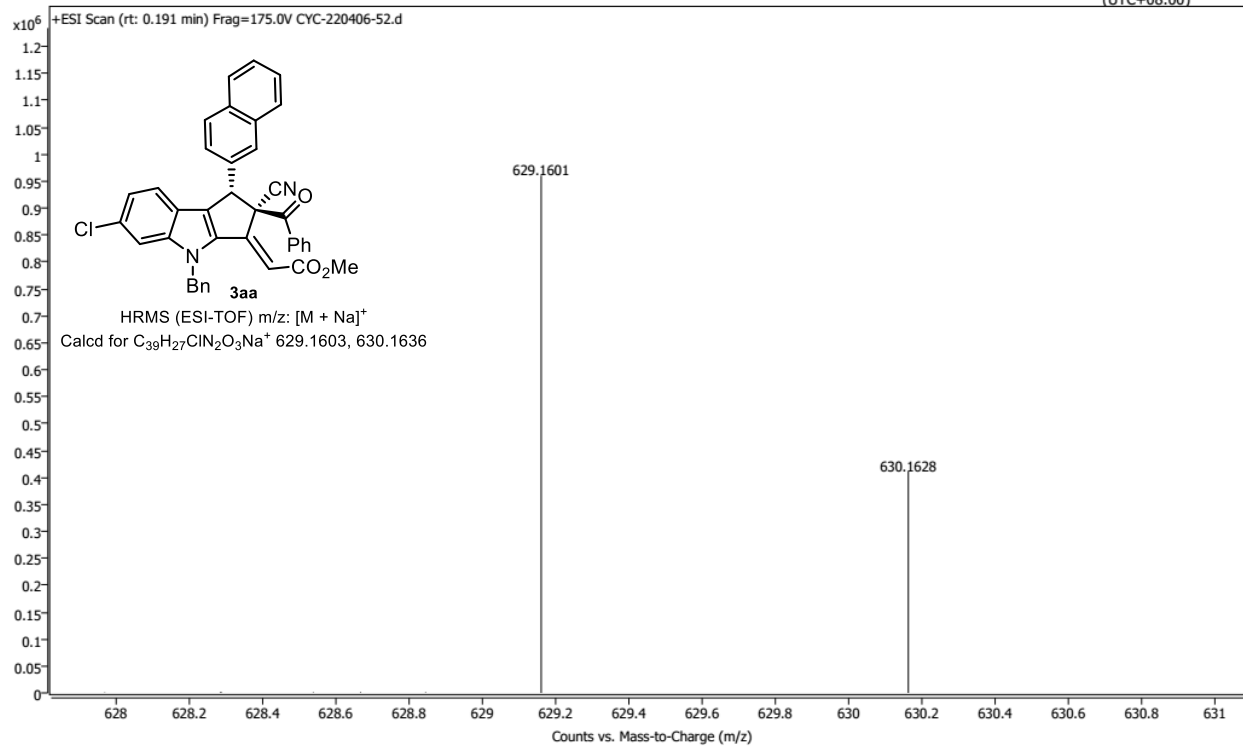

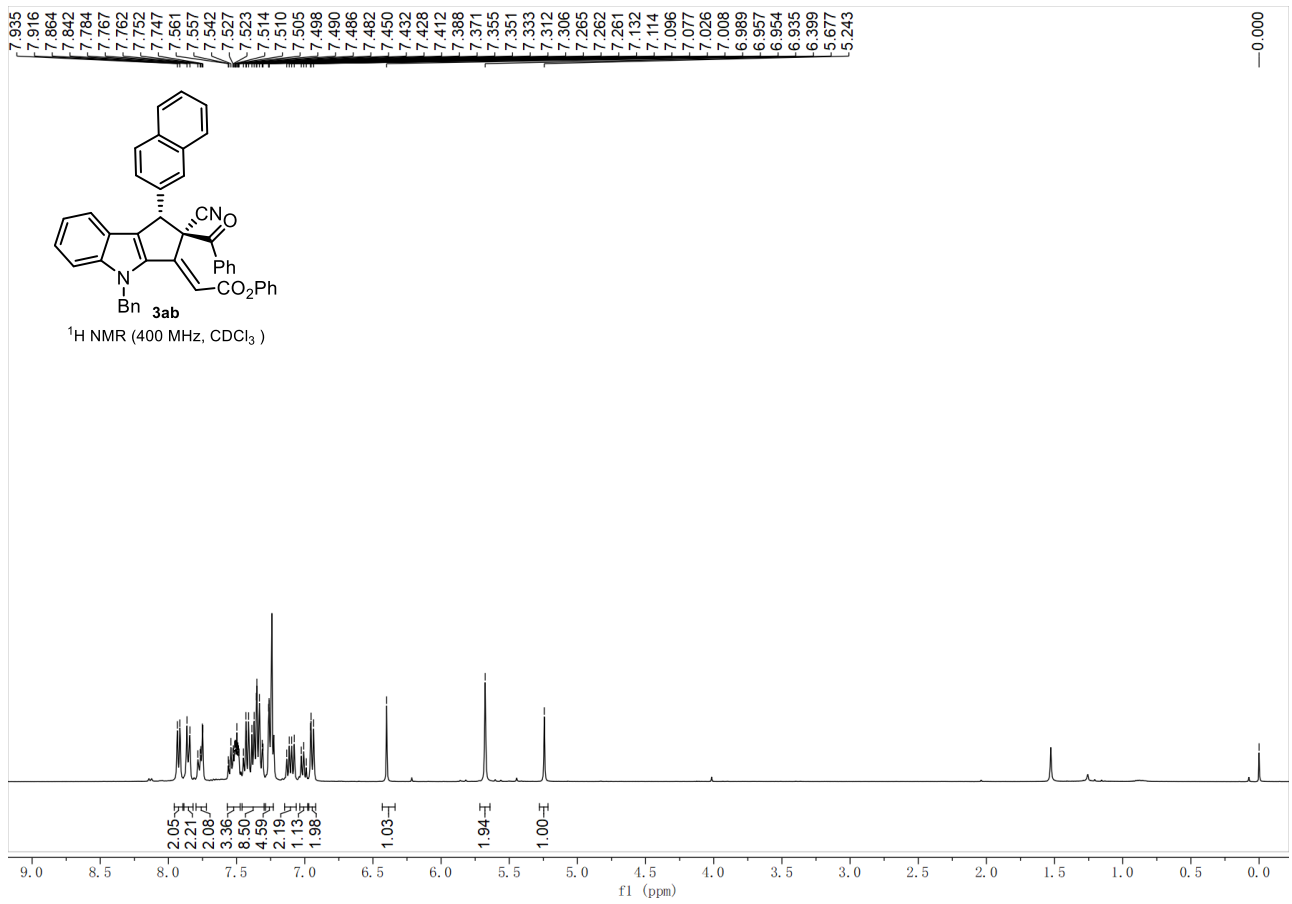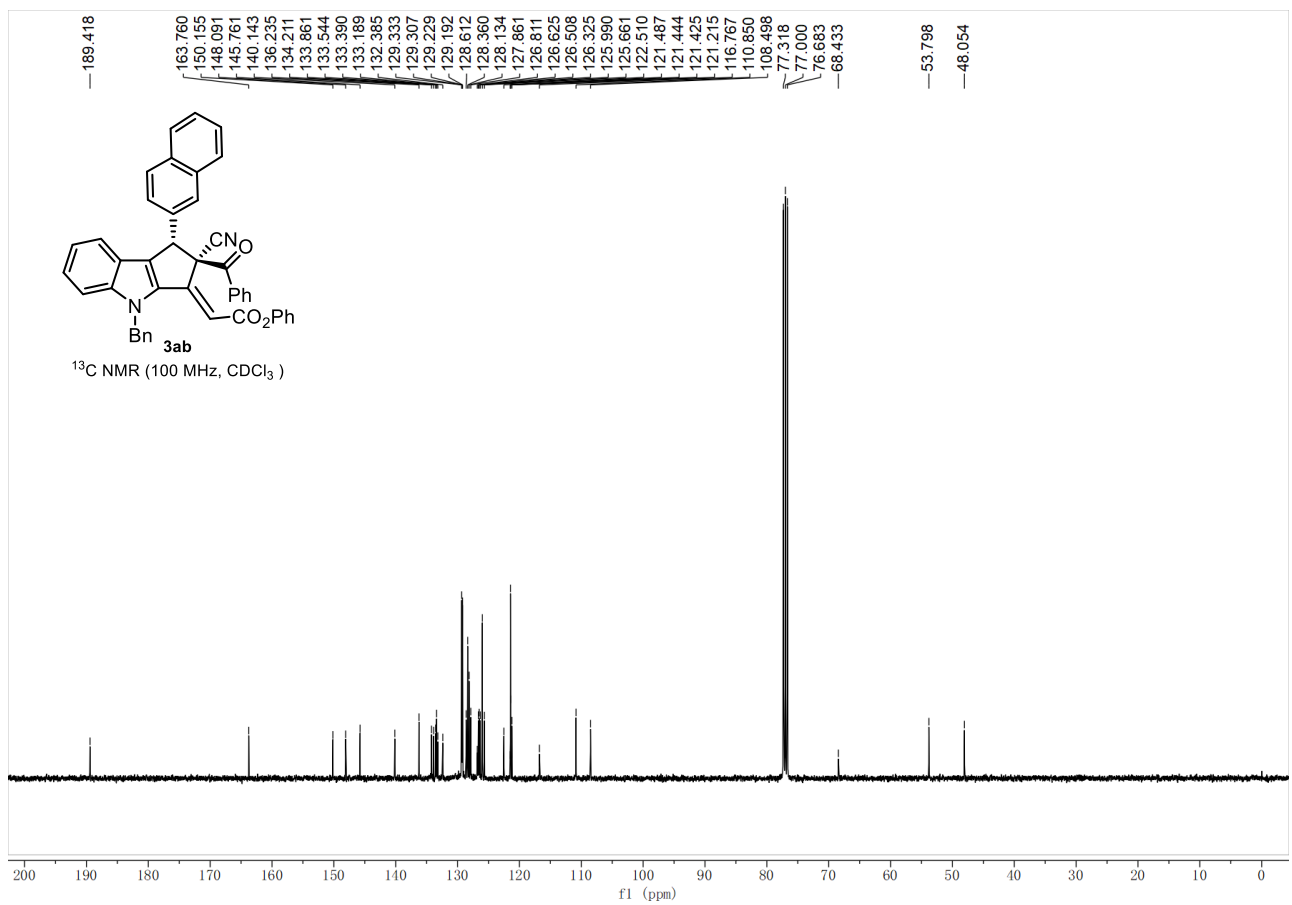

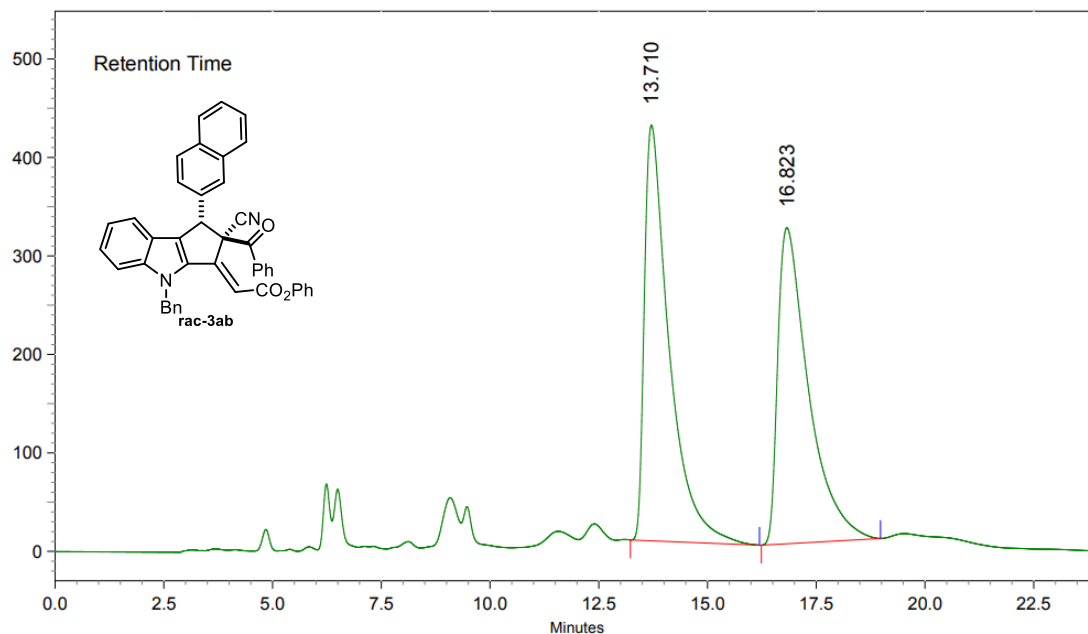

### AREA PERCENT REPORT

| Peak No. | Ret Time | Width | Height  | Area      | Area [%] |
|----------|----------|-------|---------|-----------|----------|
| 1        | 13.710   | 2.967 | 7082341 | 280591765 | 51.4656  |
| 2        | 16.823   | 2.740 | 5383467 | 264610468 | 48.5344  |

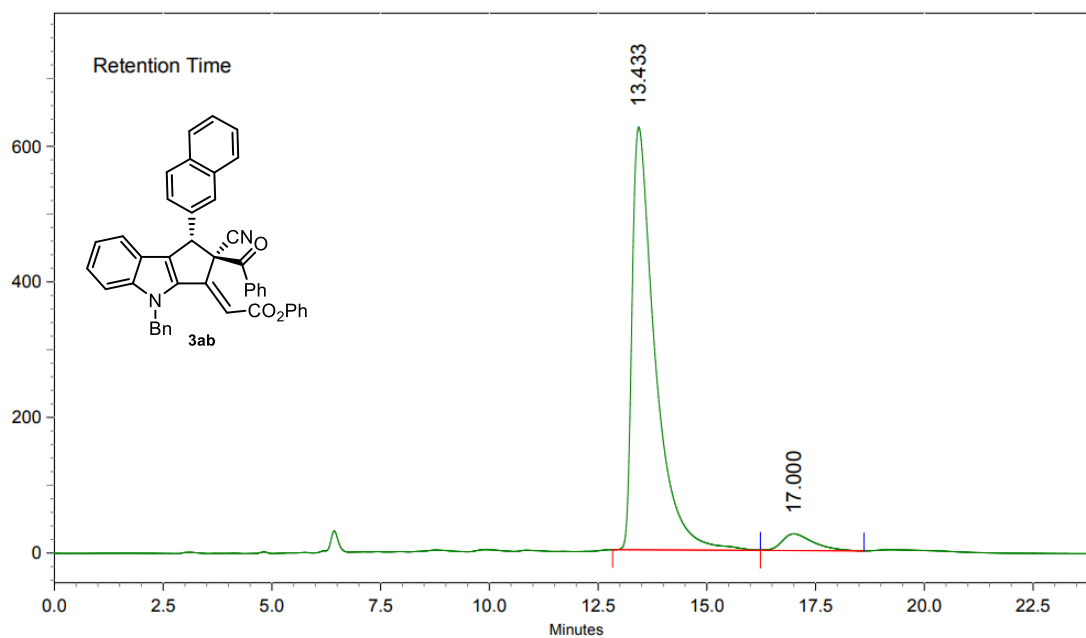

### AREA PERCENT REPORT

| Peak No. | Ret Time | Width | Height   | Area      | Area [%] |
|----------|----------|-------|----------|-----------|----------|
| 1        | 13.433   | 3.397 | 10462208 | 382501506 | 94.8707  |
| 2        | 17.000   | 2.383 | 413924   | 20680376  | 5.1293   |

|                |                 |              |                |            |                  |                                                    |
|----------------|-----------------|--------------|----------------|------------|------------------|----------------------------------------------------|
| Name           | CYC-220406-56   | Rack Pos.    |                | Instrument | Instrument 1     | Operator                                           |
| Inj. Vol. (ul) | 8               | Plate Pos.   |                | IRM Status | Some ions missed |                                                    |
| Data File      | CYC-220406-56.d | Method (Acq) | ZYJ-20201106.m | Comment    |                  | Acq. Time (Local) 4/9/2022 11:51:01 AM (UTC+08:00) |

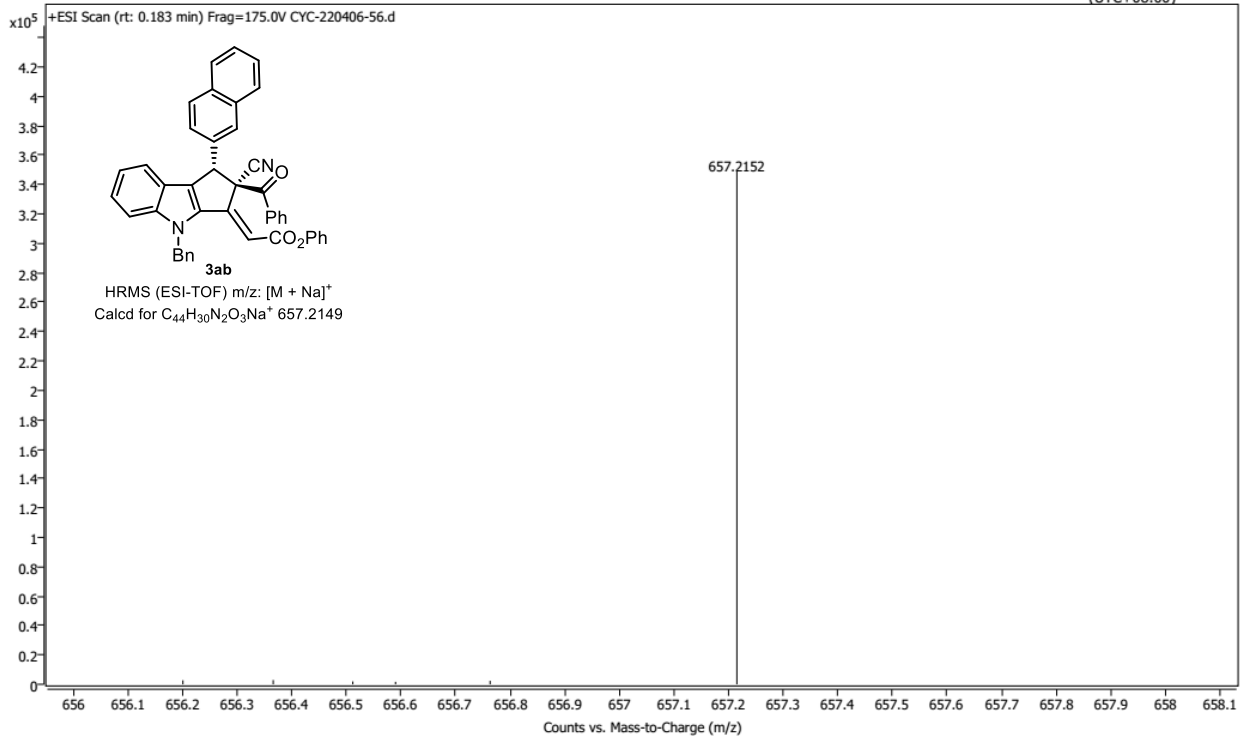



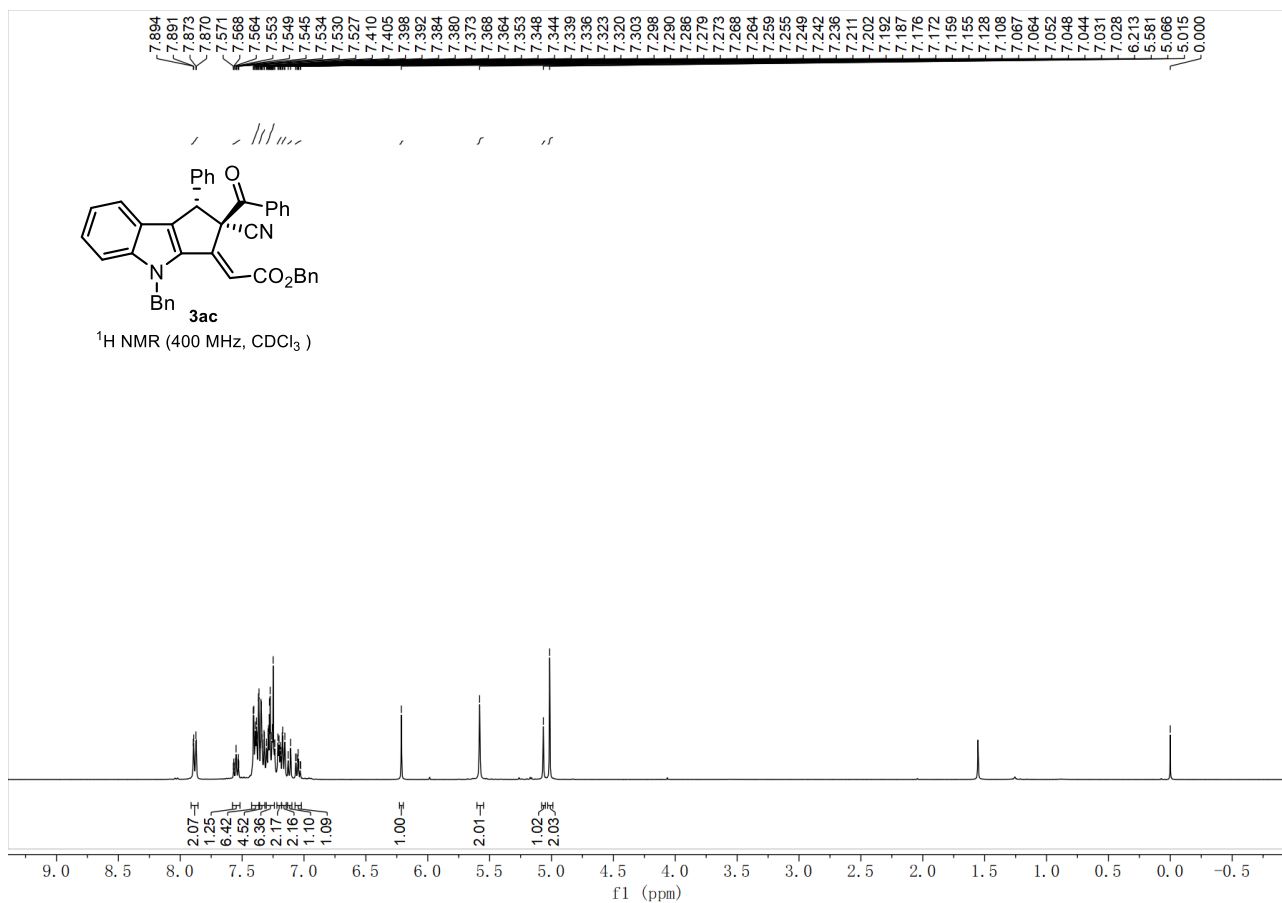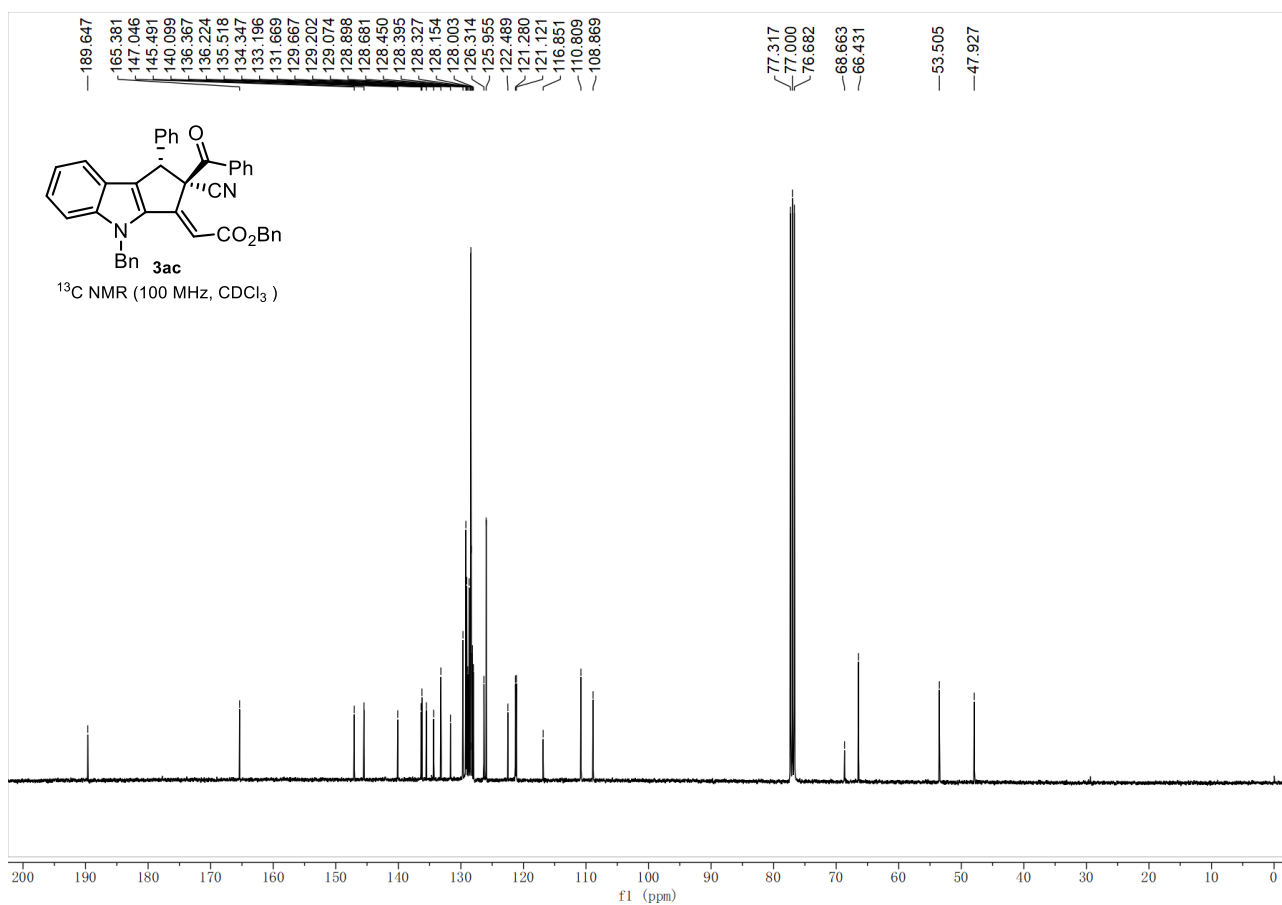

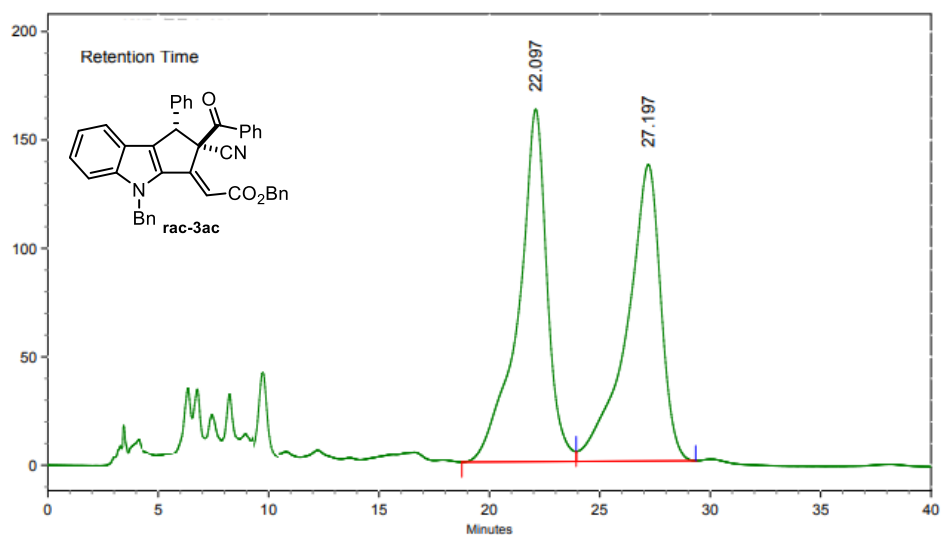

### AREA PERCENT REPORT

| Peak No. | Ret Time | Width | Height  | Area      | Area [%] |
|----------|----------|-------|---------|-----------|----------|
| 1        | 22.097   | 5.177 | 2726183 | 247420821 | 50.1825  |
| 2        | 27.197   | 5.413 | 2293385 | 245621075 | 49.8175  |

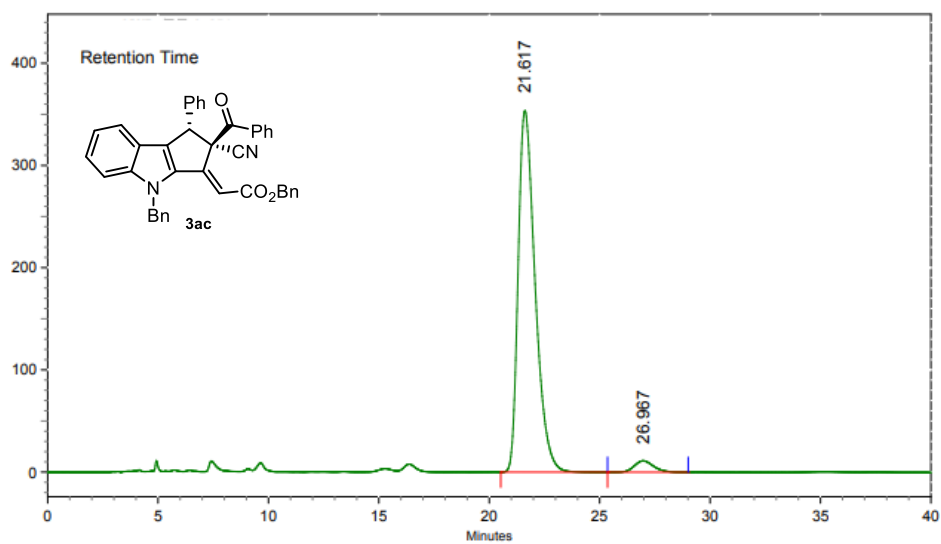

### AREA PERCENT REPORT

| Peak No. | Ret Time | Width | Height  | Area      | Area [%] |
|----------|----------|-------|---------|-----------|----------|
| 1        | 21.617   | 4.837 | 5933354 | 316584930 | 96.5171  |
| 2        | 26.967   | 3.653 | 187267  | 11424122  | 3.4829   |

|                |                 |              |                |            |              |                   |                      |
|----------------|-----------------|--------------|----------------|------------|--------------|-------------------|----------------------|
| Name           | CYC-220406-54   | Rack Pos.    |                | Instrument | Instrument 1 | Operator          |                      |
| Inj. Vol. (ul) | 8               | Plate Pos.   |                | IRM Status | Success      | Acq. Time (Local) | 4/9/2022 11:45:07 AM |
| Data File      | CYC-220406-54.d | Method (Acq) | ZYJ-20201106.m | Comment    |              |                   | (UTC+08:00)          |

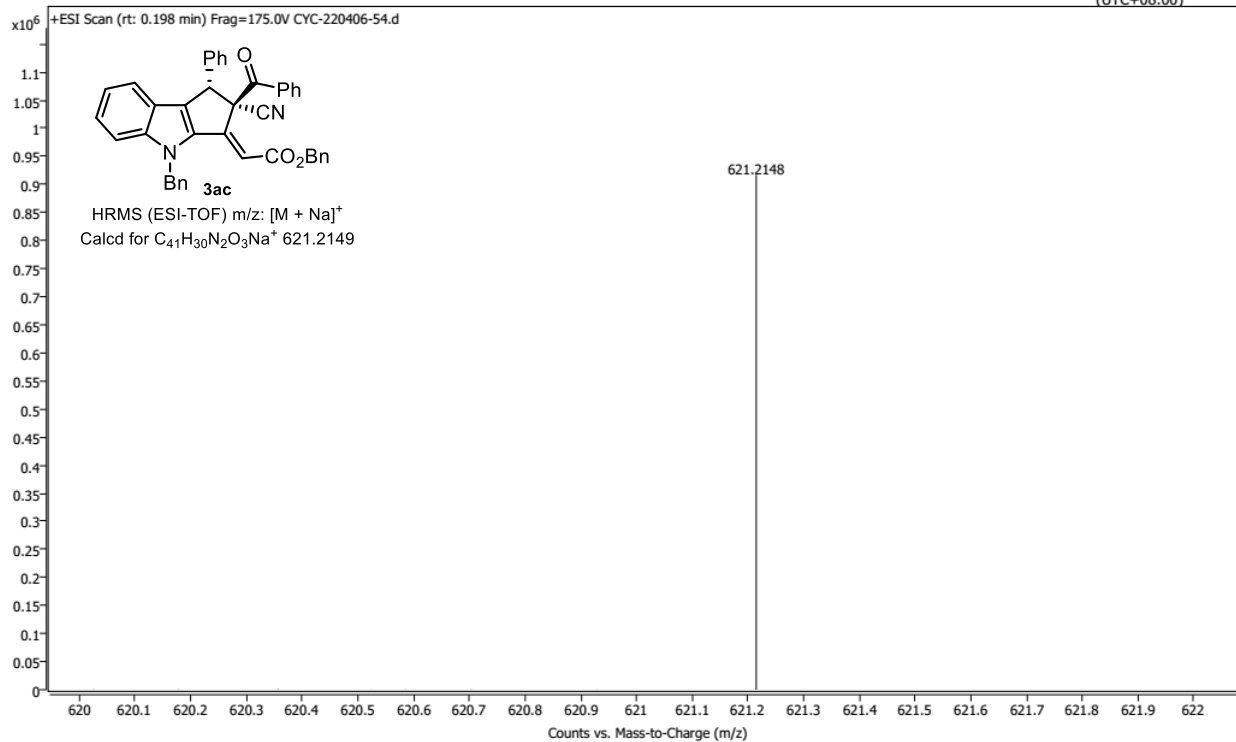

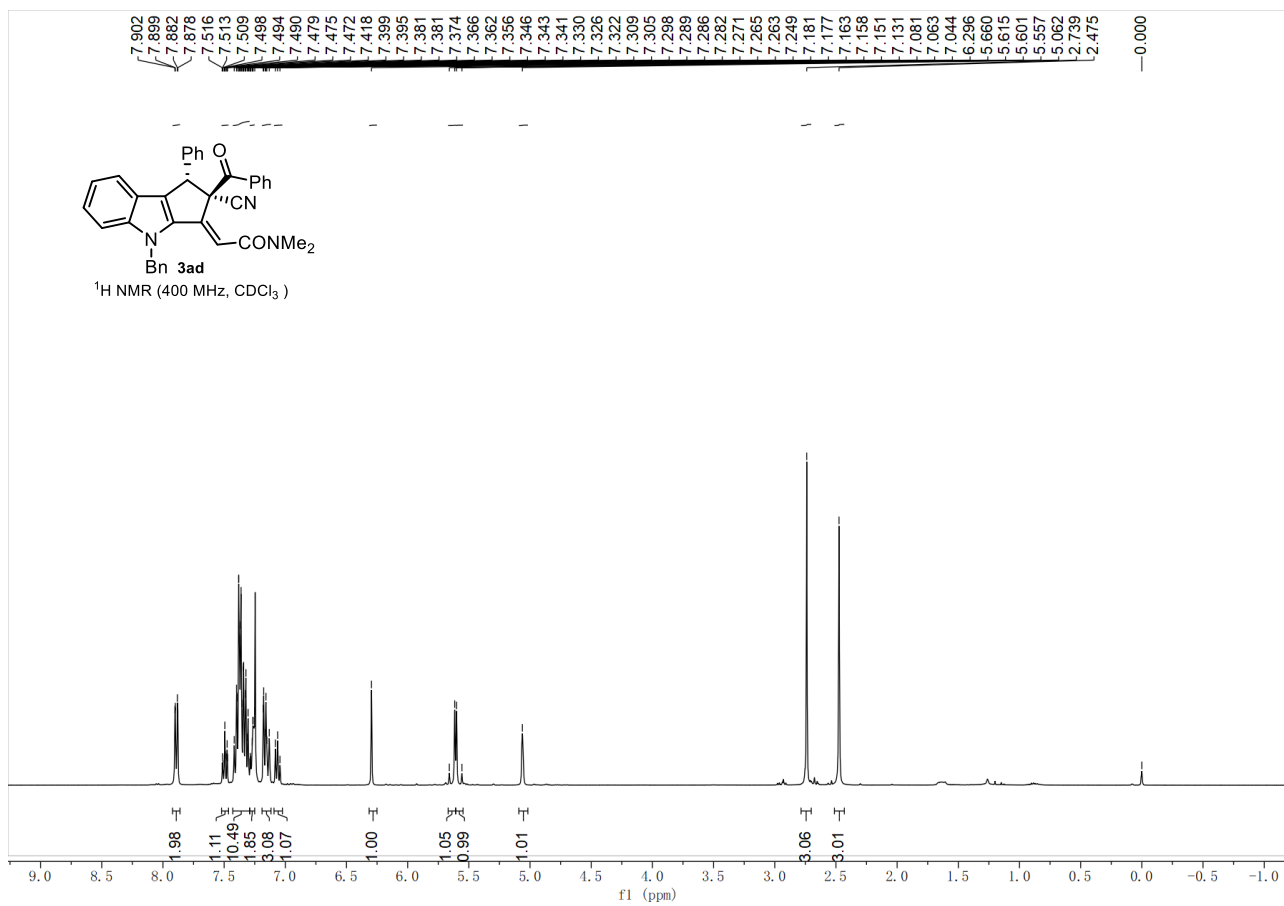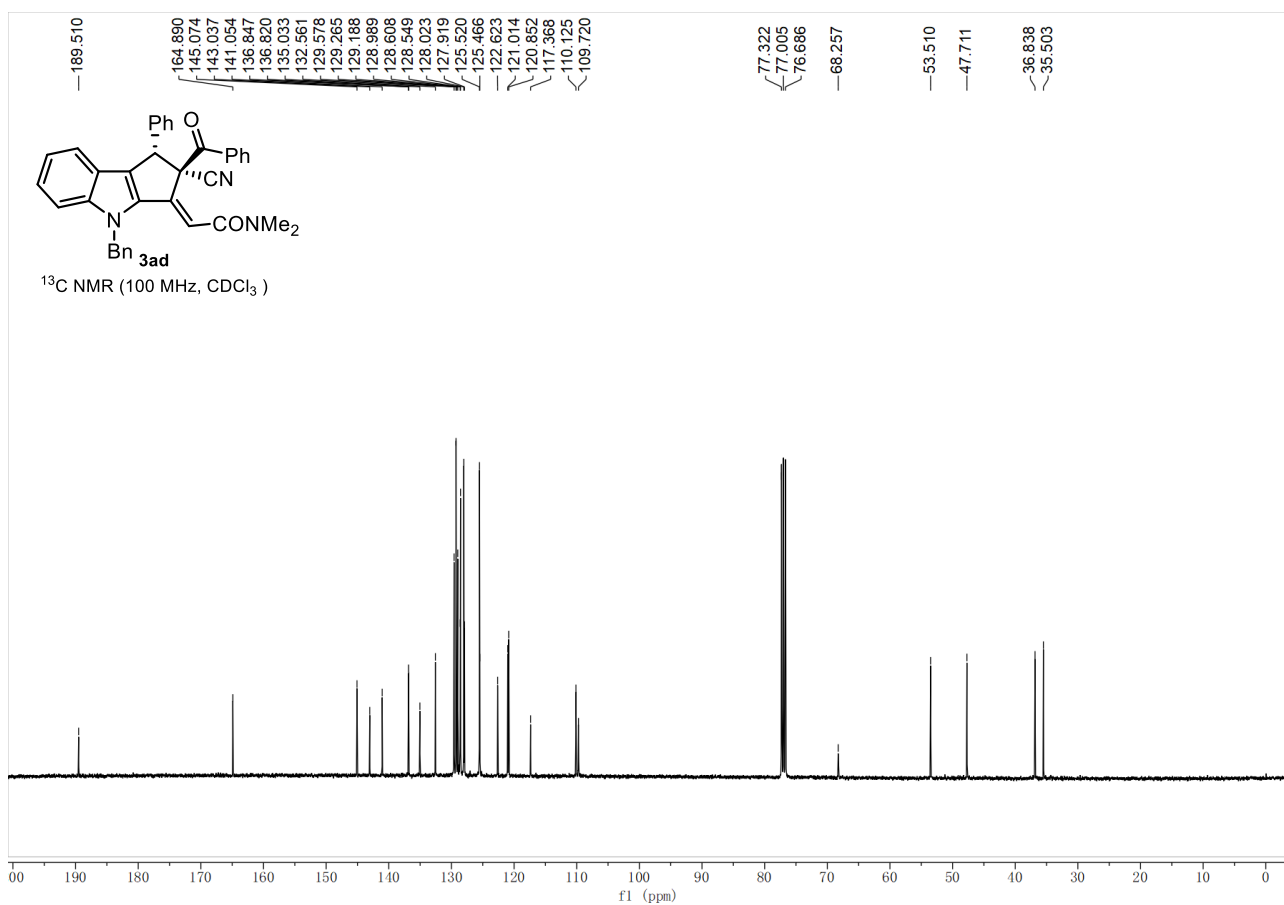

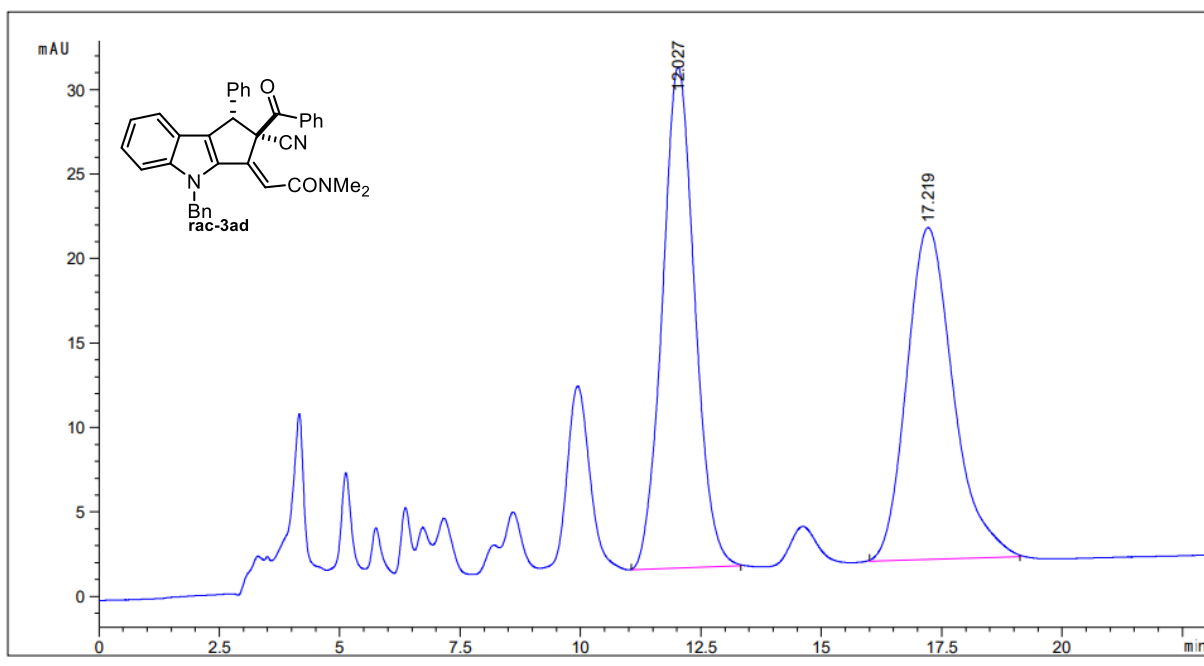

| # | [min]     | [min]  | mAU        | *s | [mAU ]   | %       |
|---|-----------|--------|------------|----|----------|---------|
| 1 | 12.027 BB | 0.7112 | 1385.19910 |    | 29.64283 | 51.2419 |
| 2 | 17.219 BB | 0.9910 | 1318.05688 |    | 19.64542 | 48.7581 |

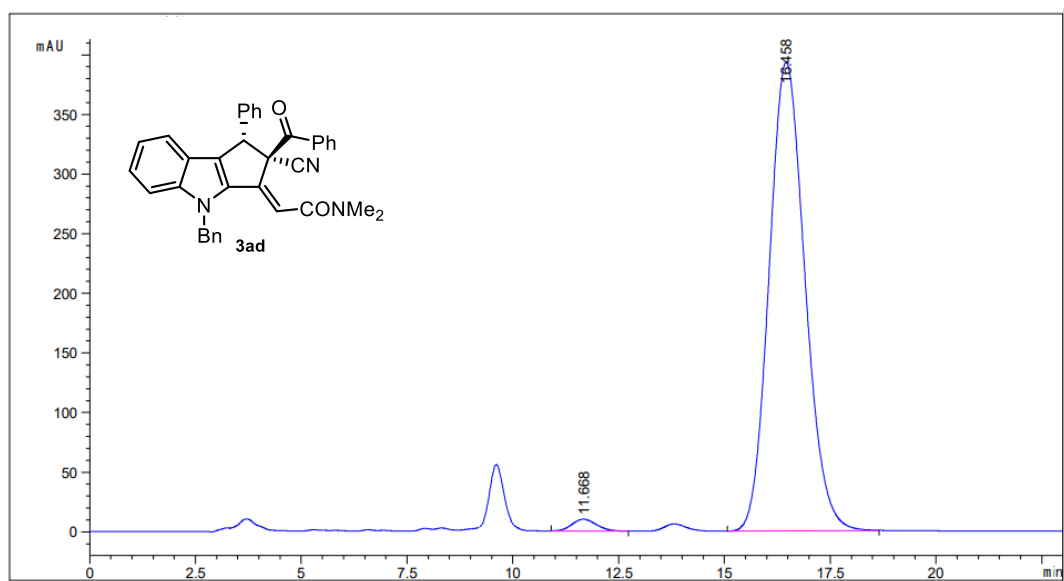

| # | [min]     | [min]  | mAU       | *s | [mAU ]    | %       |
|---|-----------|--------|-----------|----|-----------|---------|
| 1 | 11.668 BB | 0.6204 | 396.85764 |    | 9.87316   | 1.6882  |
| 2 | 16.458 BB | 0.9133 | 2.31102e4 |    | 392.94519 | 98.3118 |

|                |                 |              |                |            |                  |                   |                                  |
|----------------|-----------------|--------------|----------------|------------|------------------|-------------------|----------------------------------|
| Name           | CYC-220406-55   | Rack Pos.    |                | Instrument | Instrument 1     | Operator          |                                  |
| Inj. Vol. (ul) | 8               | Plate Pos.   |                | IRM Status | Some ions missed |                   |                                  |
| Data File      | CYC-220406-55.d | Method (Acq) | ZYJ-20201106.m | Comment    |                  | Acq. Time (Local) | 4/9/2022 11:48:04 AM (UTC+08:00) |

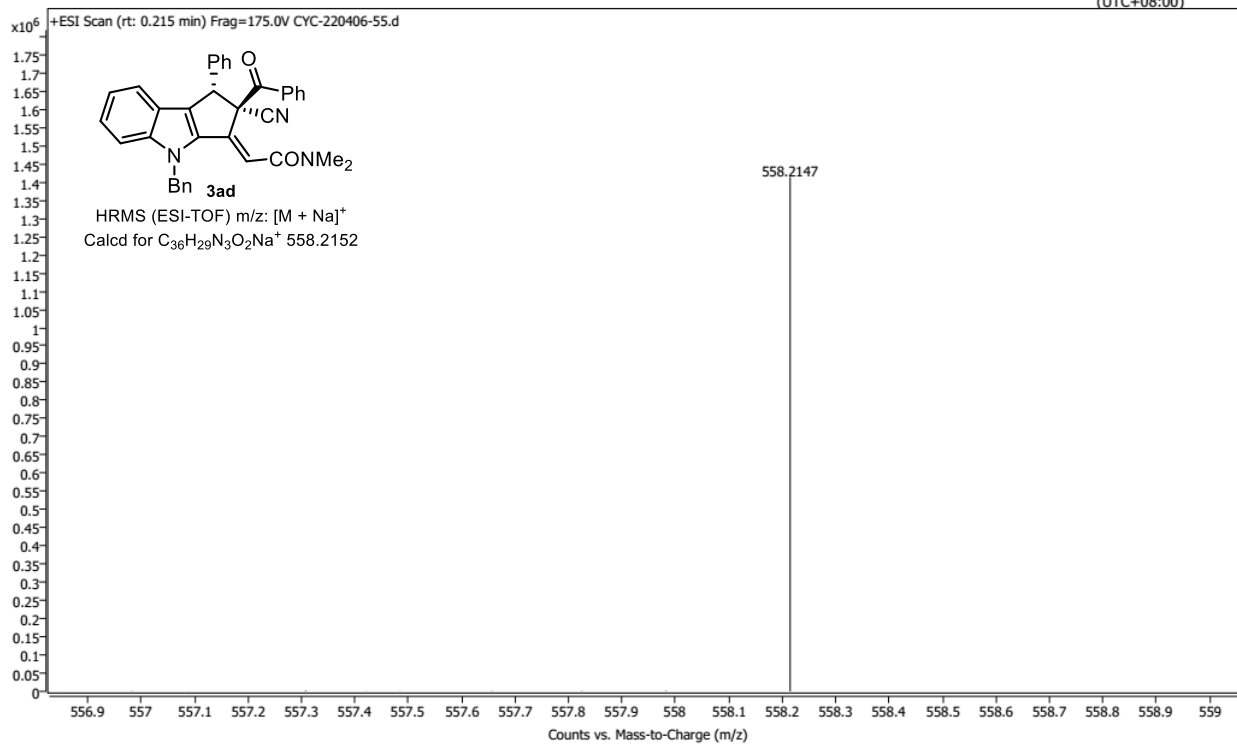

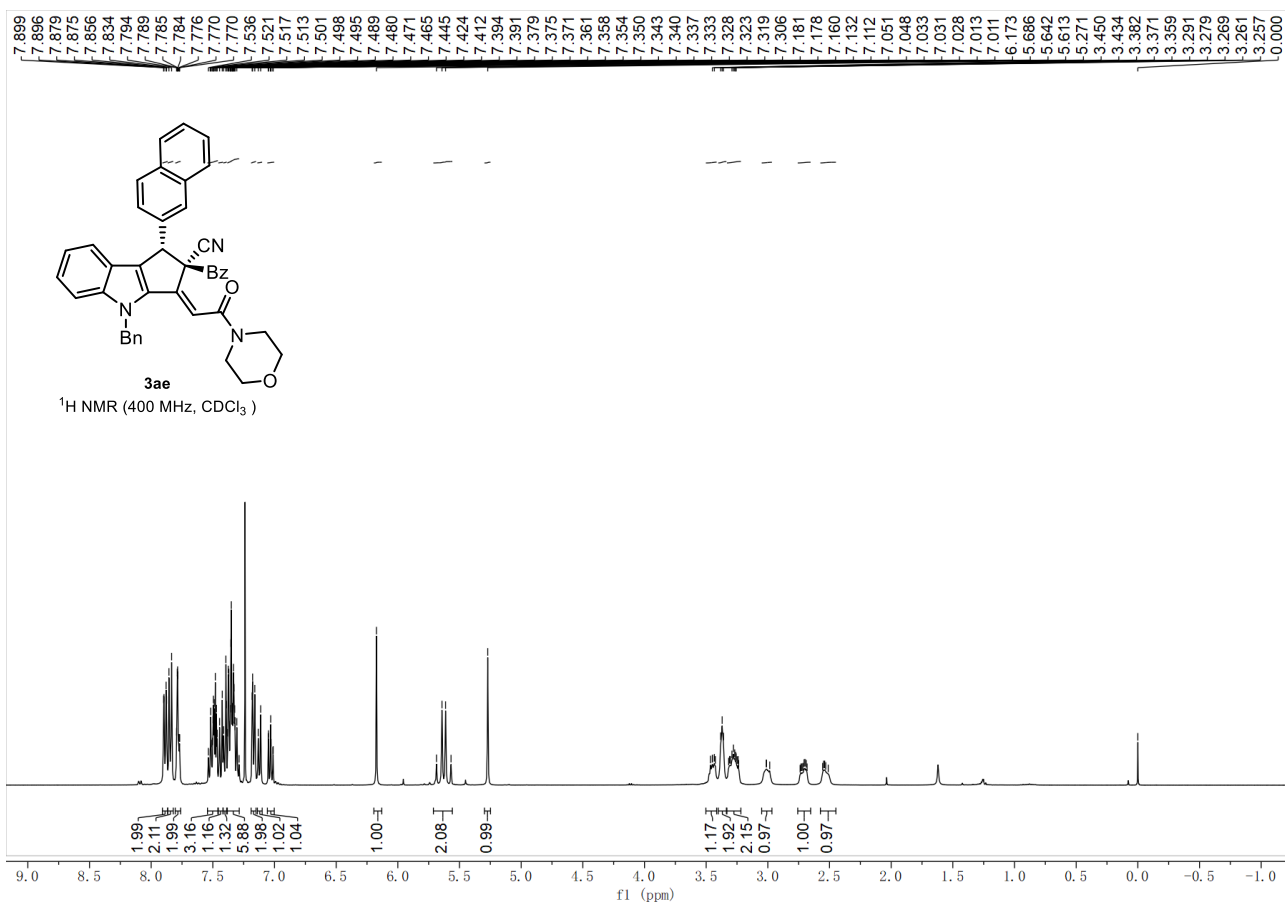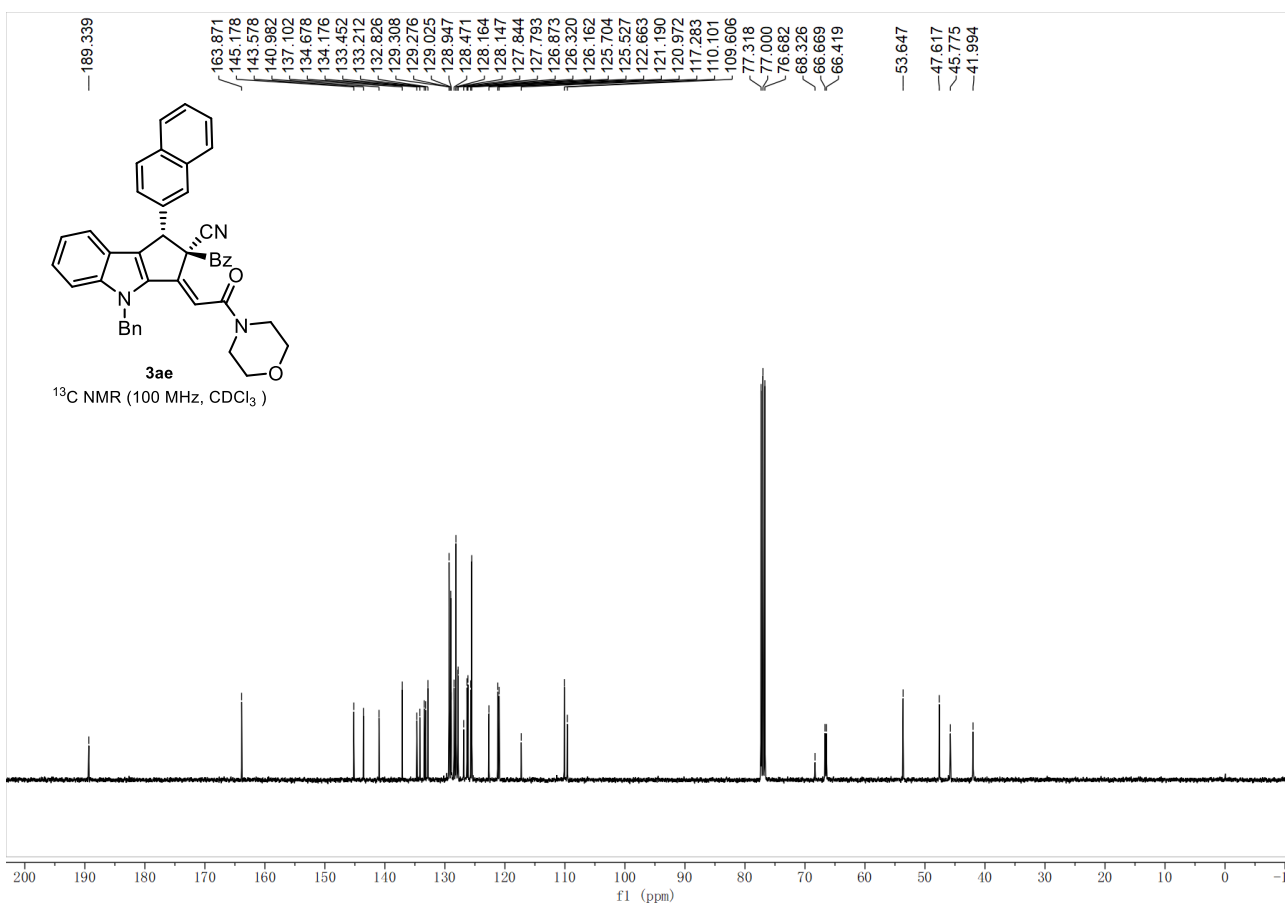

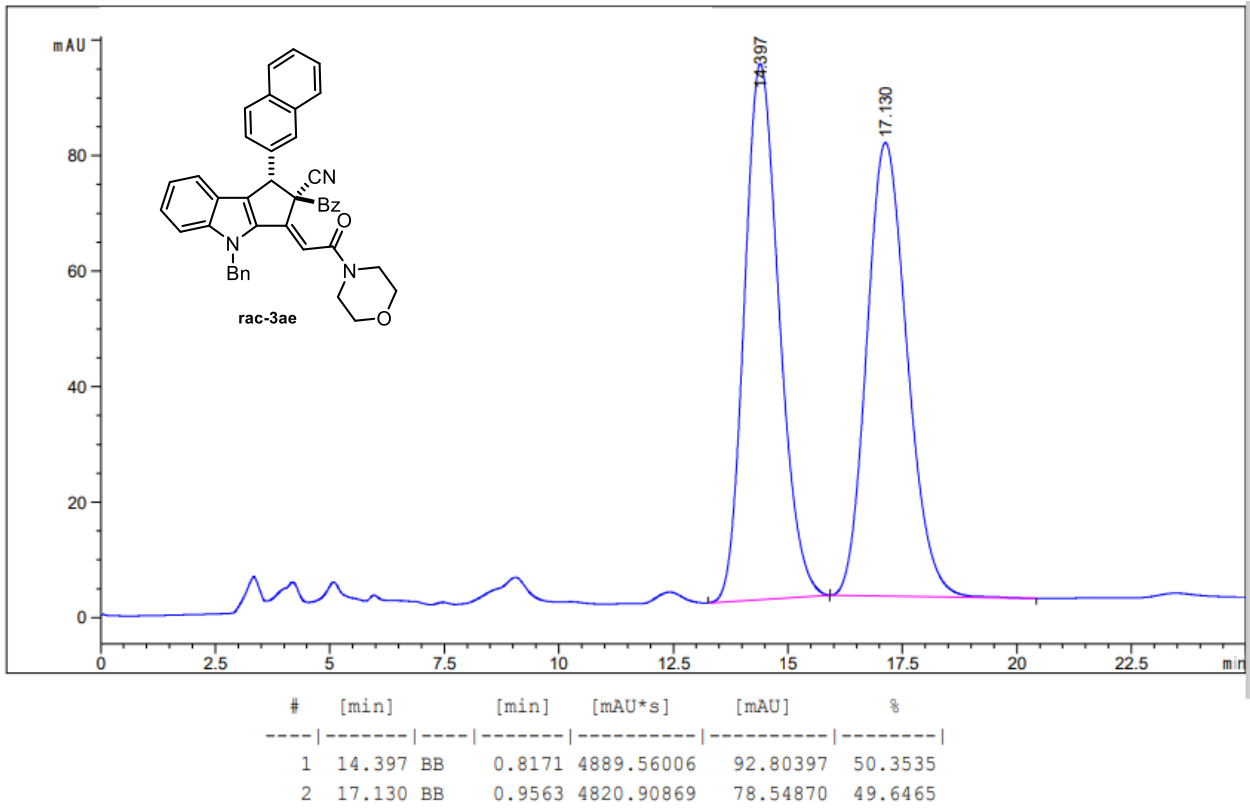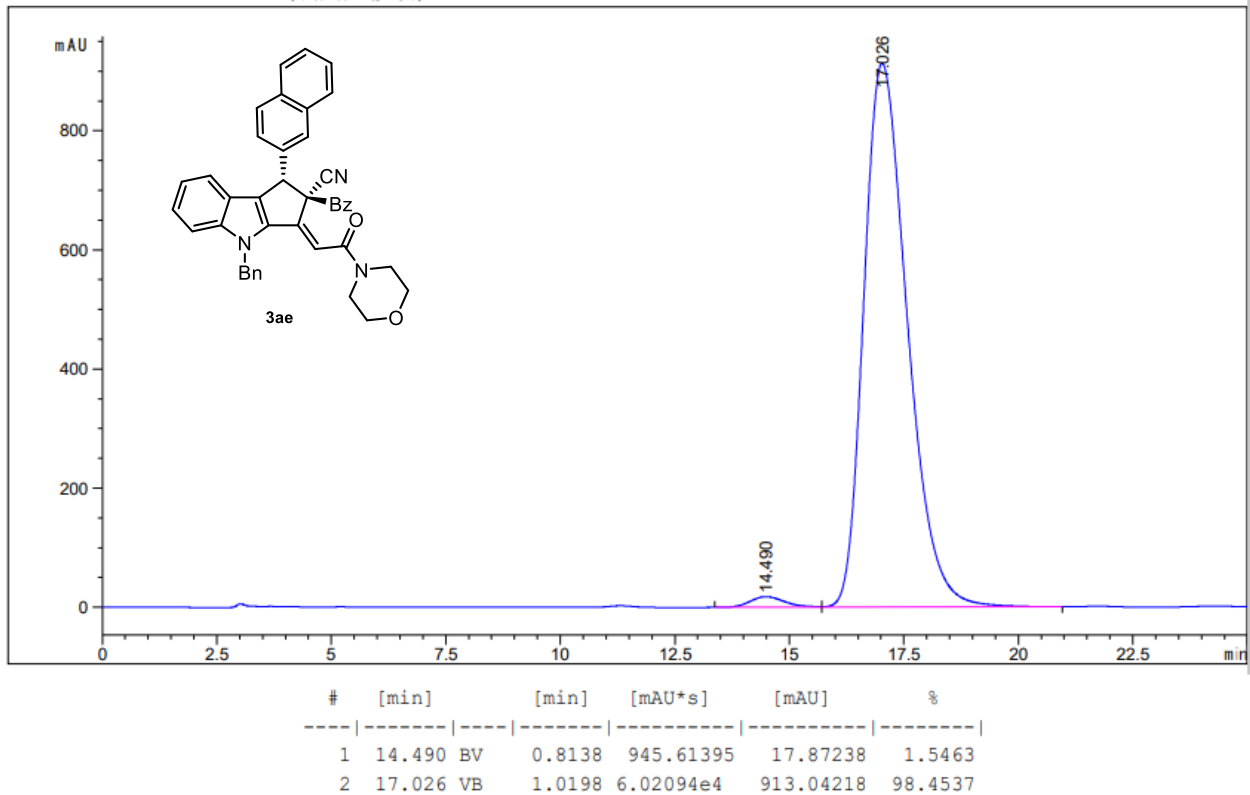



# User Spectrum Plot Report

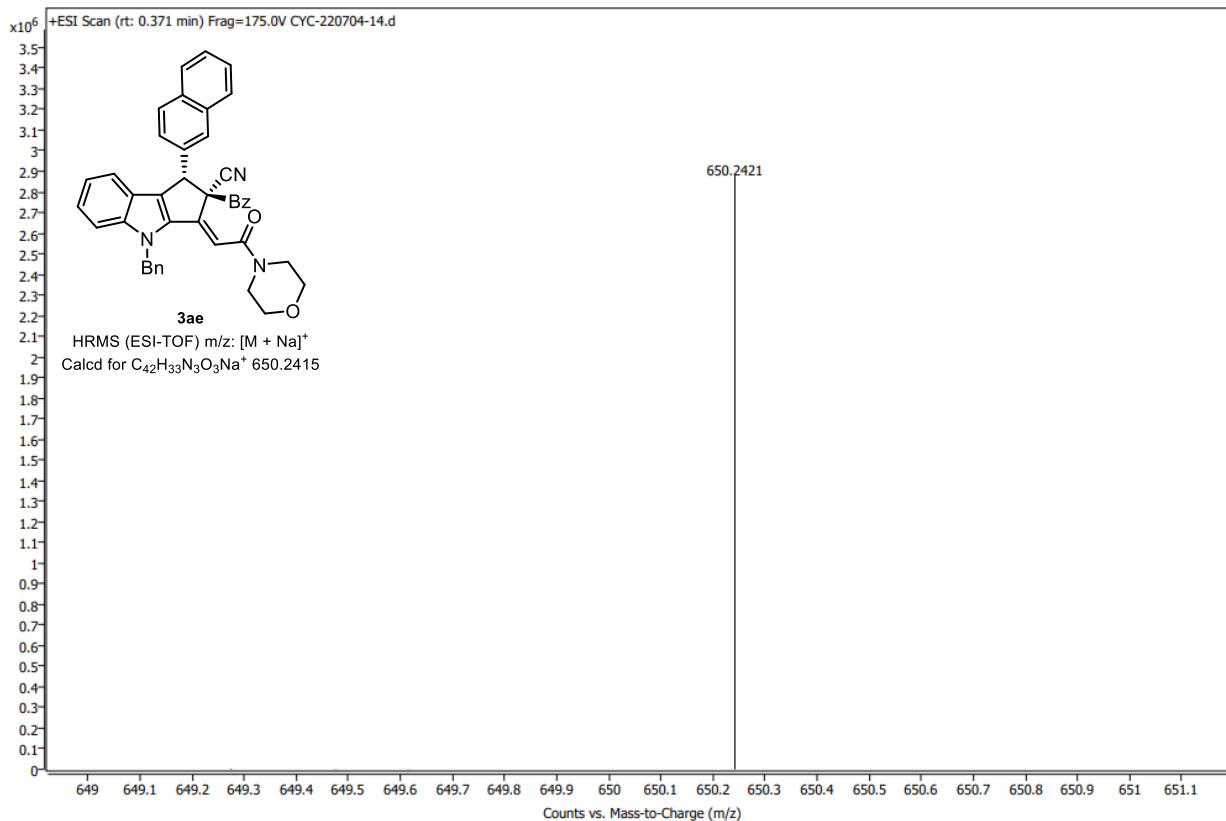

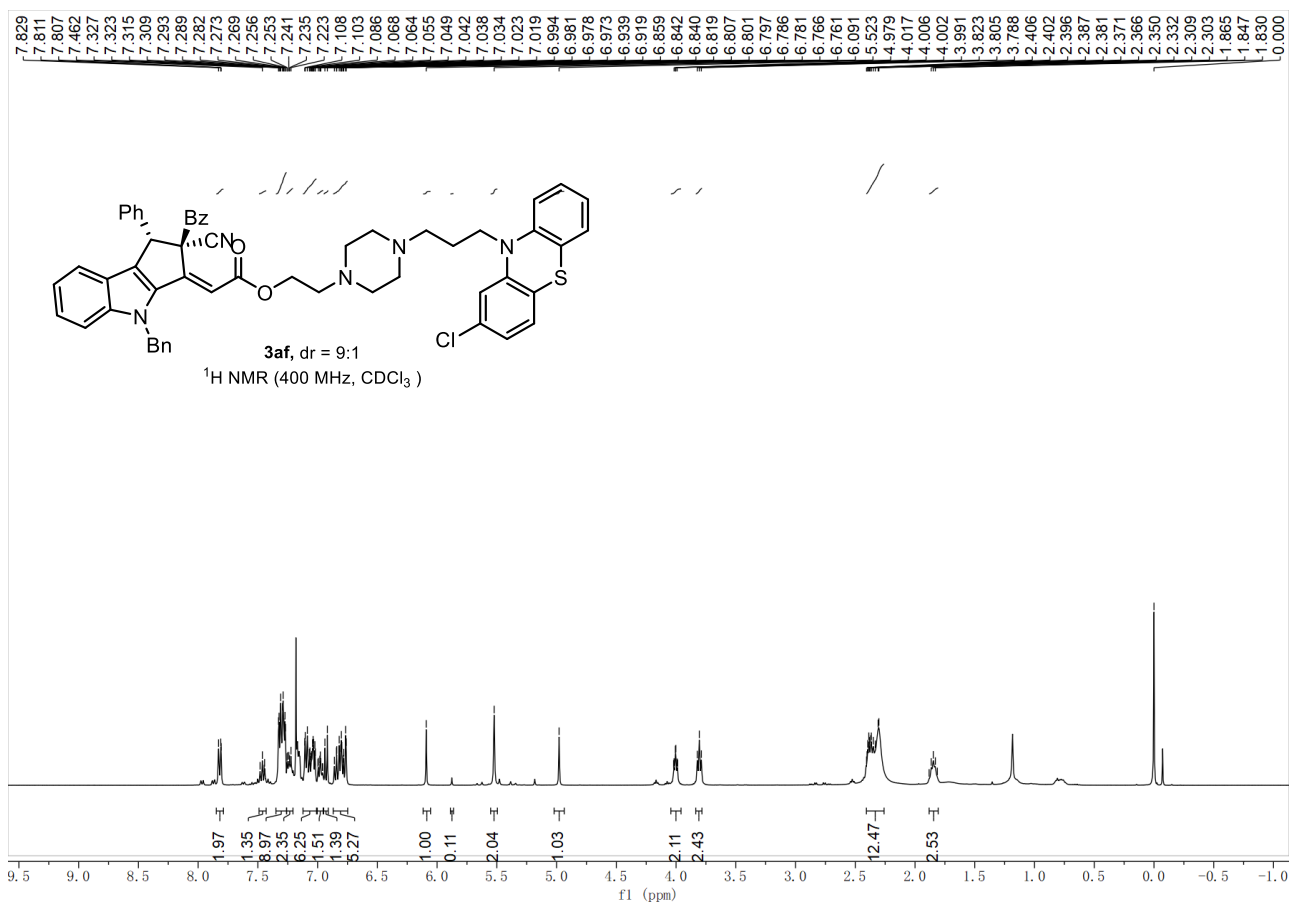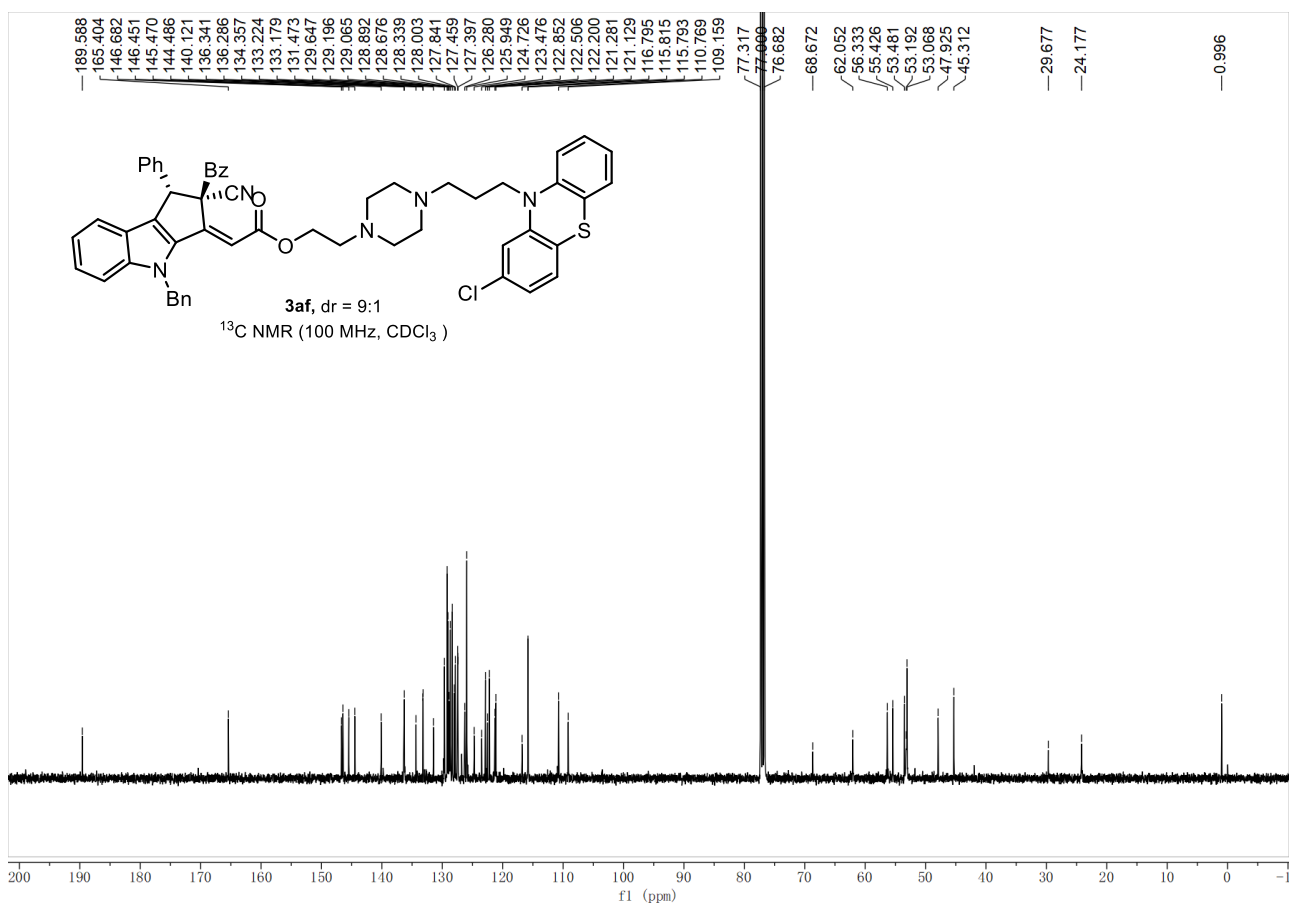

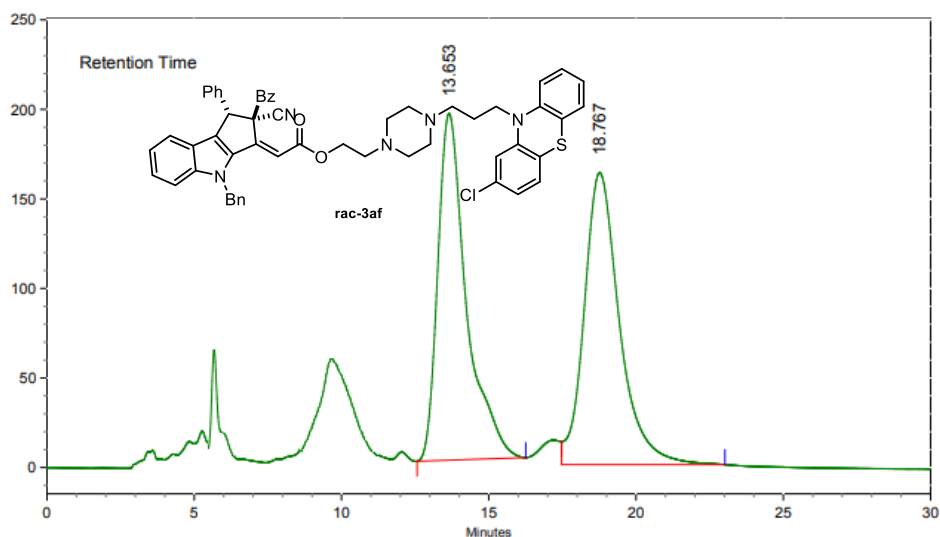

AREA PERCENT REPORT

| Peak No. | Ret Time | Width | Height  | Area      | Area [%] |
|----------|----------|-------|---------|-----------|----------|
| 1        | 13.653   | 3.690 | 3247868 | 219235294 | 49.0299  |
| 2        | 18.767   | 5.547 | 2735948 | 227910397 | 50.9701  |

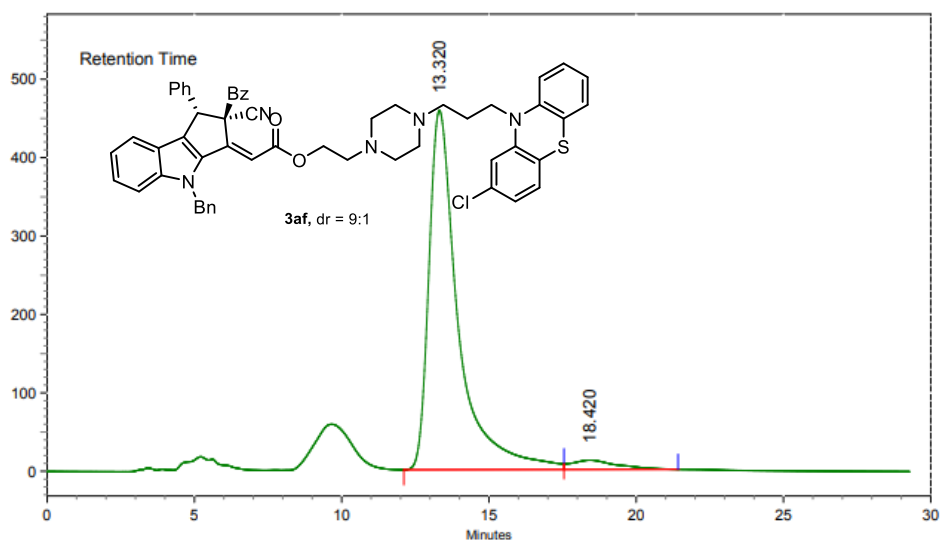

AREA PERCENT REPORT

| Peak No. | Ret Time | Width | Height  | Area      | Area [%] |
|----------|----------|-------|---------|-----------|----------|
| 1        | 13.320   | 5.437 | 7686765 | 533953003 | 96.1849  |
| 2        | 18.420   | 3.873 | 198602  | 21178873  | 3.8151   |

Name  
Inj. Vol. (ul)  
Data File

CYC-220509-20  
8  
CYC-220509-20.d

Rack Pos.  
Plate Pos.  
Method (Acq)

ZYJ-20201106.m

Instrument  
IRM Status  
Comment

Instrument 1  
Some ions missed

Operator  
Acq. Time (Local)

5/11/2022 5:06:42 PM  
(UTC+08:00)

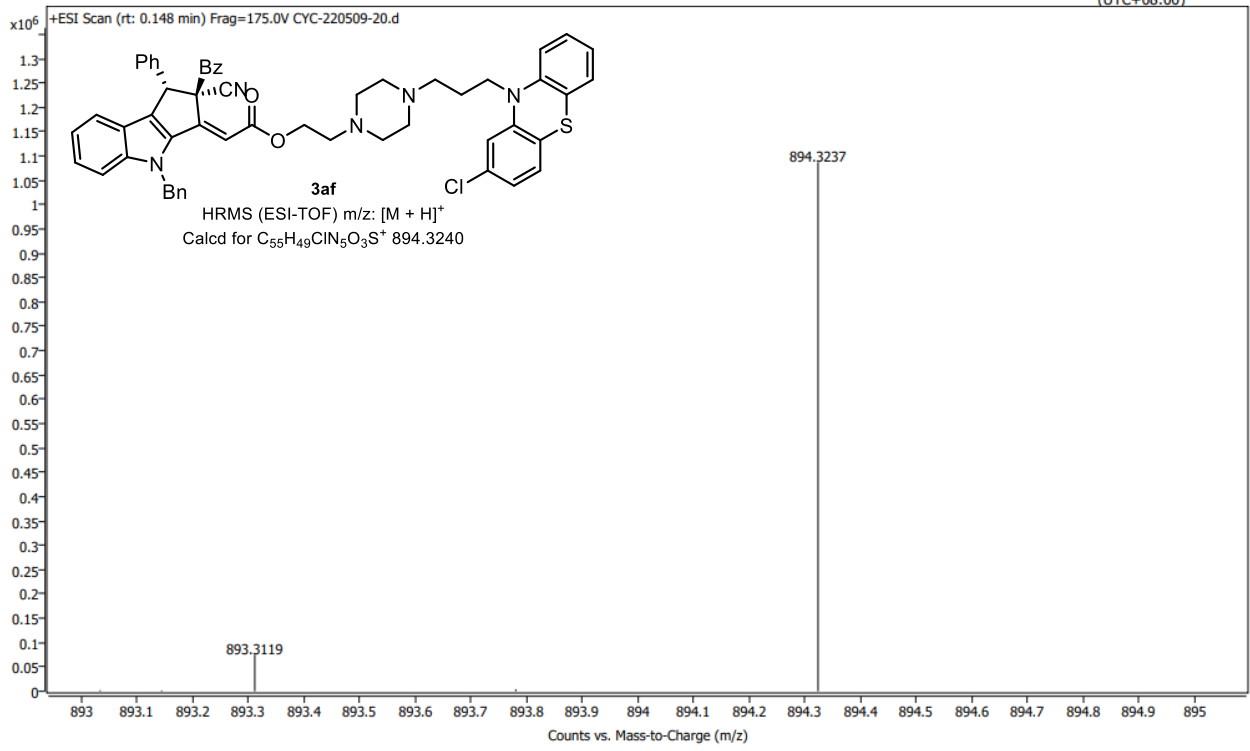

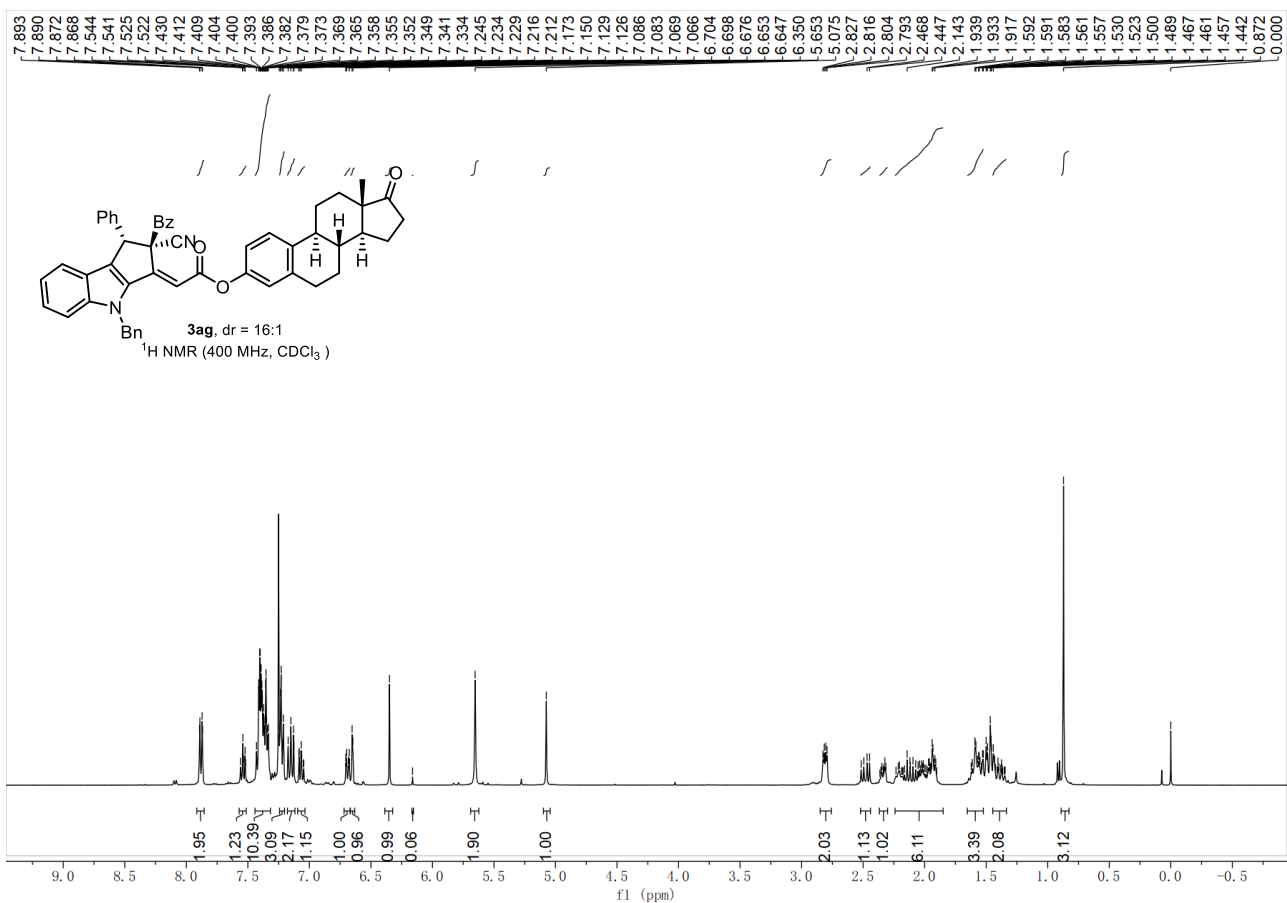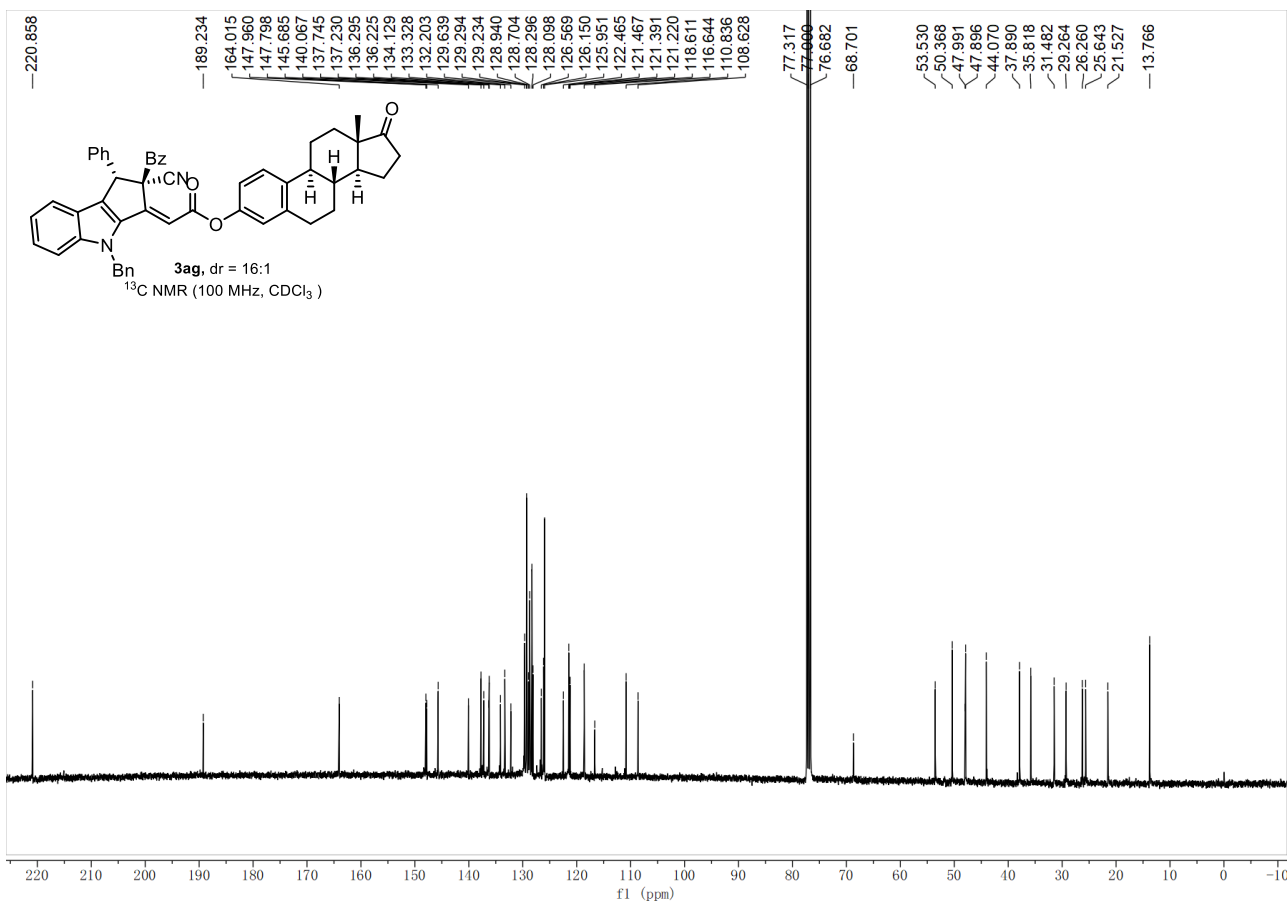

| Name           | CYC-220509-19   | Rack Pos.    | Instrument     | Instrument 1 | Operator                                           |
|----------------|-----------------|--------------|----------------|--------------|----------------------------------------------------|
| Inj. Vol. (ul) | 8               | Plate Pos.   | IRM Status     | Success      |                                                    |
| Data File      | CYC-220509-19.d | Method (Acq) | ZYJ-20201106.m | Comment      | Acq. Time (Local) 5/11/2022 5:03:45 PM (UTC+08:00) |

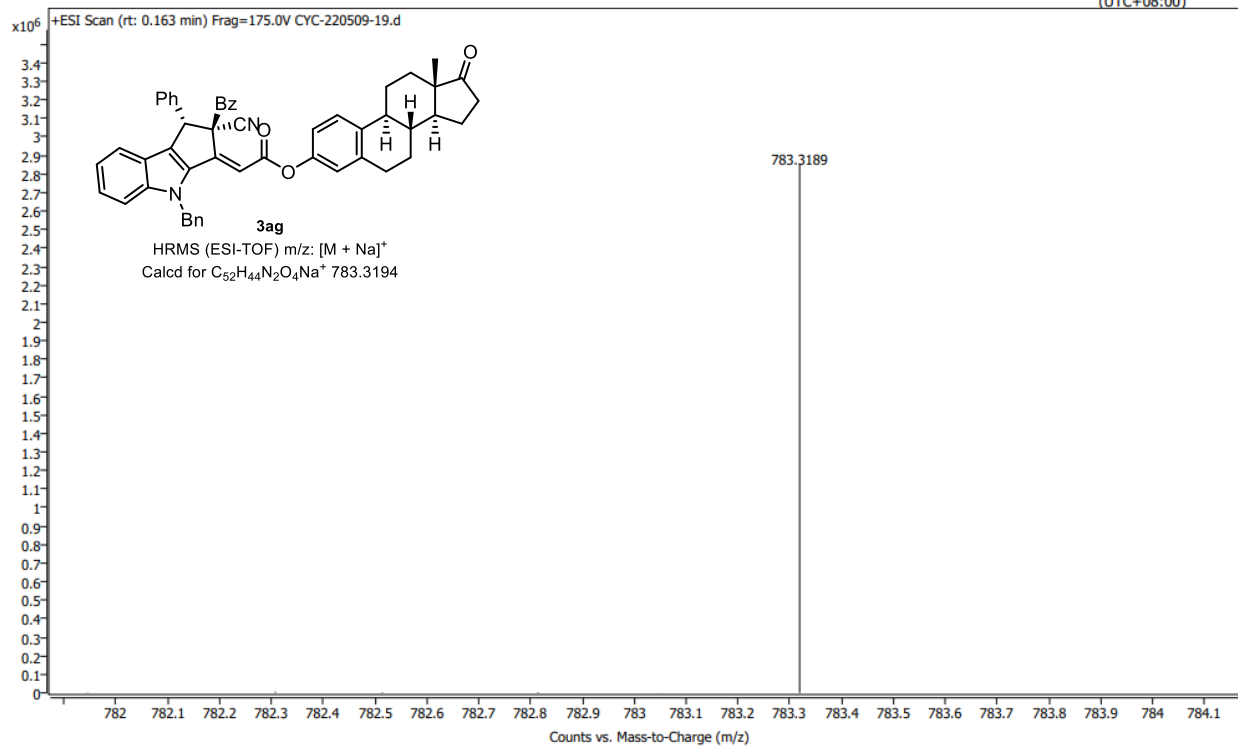

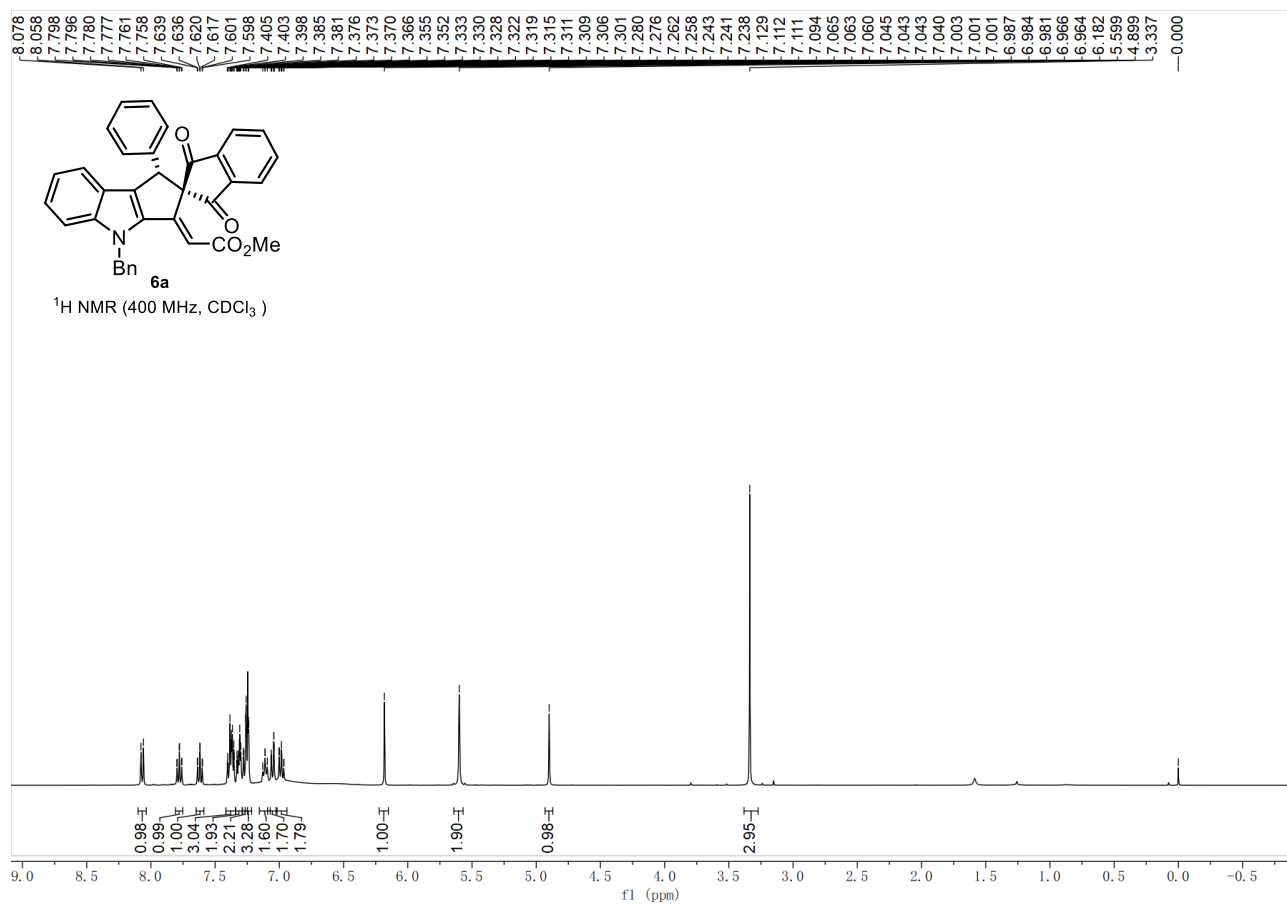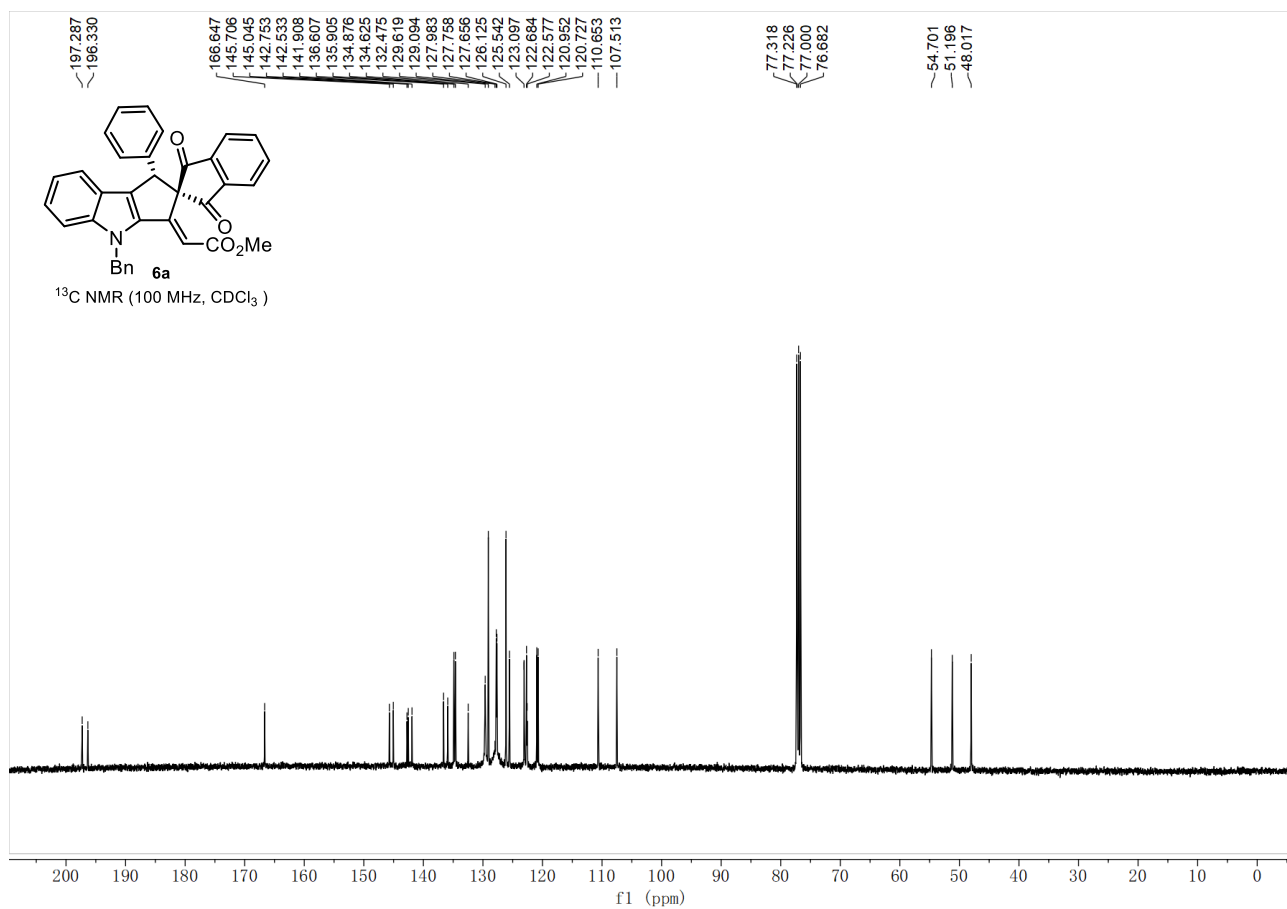

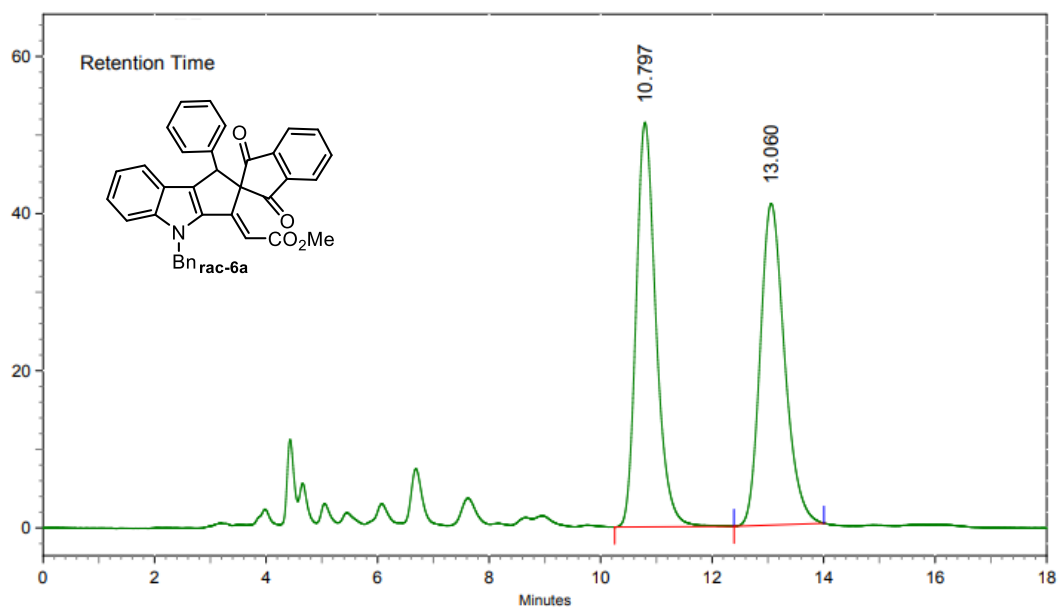

### AREA PERCENT REPORT

| Peak No. | Ret Time | Width | Height | Area     | Area [%] |
|----------|----------|-------|--------|----------|----------|
| 1        | 10.797   | 2.137 | 863508 | 21285389 | 50.5921  |
| 2        | 13.060   | 1.613 | 686538 | 20787199 | 49.4079  |

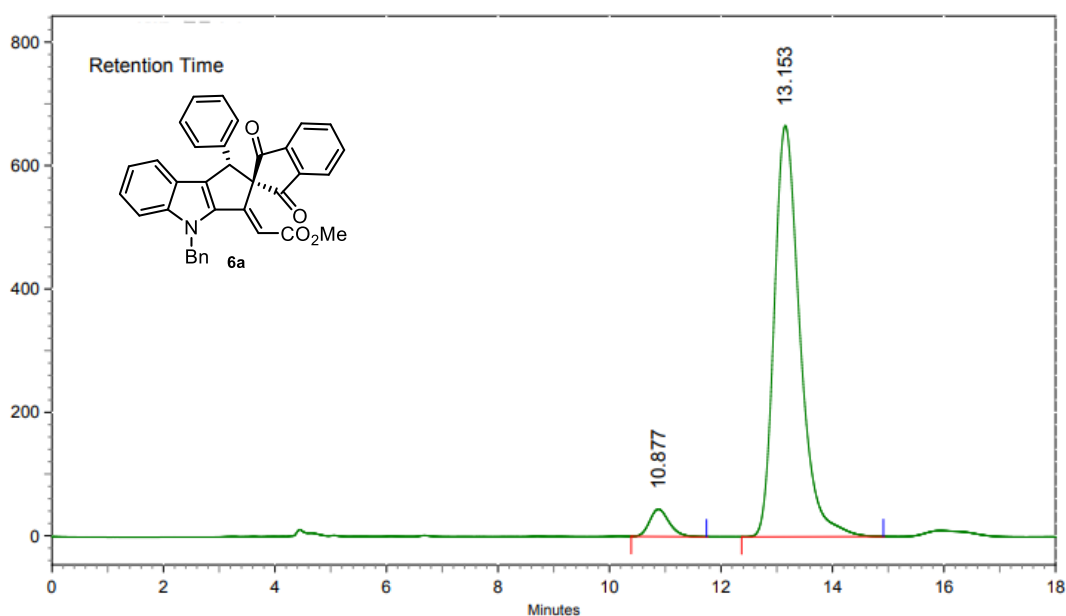

### AREA PERCENT REPORT

| Peak No. | Ret Time | Width | Height   | Area      | Area [%] |
|----------|----------|-------|----------|-----------|----------|
| 1        | 10.877   | 1.350 | 746160   | 18234744  | 4.8699   |
| 2        | 13.153   | 2.543 | 11176580 | 356199763 | 95.1301  |



|                |                 |              |                |            |                  |                                                    |
|----------------|-----------------|--------------|----------------|------------|------------------|----------------------------------------------------|
| Name           | CYC-220406-57   | Rack Pos.    |                | Instrument | Instrument 1     | Operator                                           |
| Inj. Vol. (ul) | 8               | Plate Pos.   |                | IRM Status | Some ions missed |                                                    |
| Data File      | CYC-220406-57.d | Method (Acq) | ZYJ-20201106.m | Comment    |                  | Acq. Time (Local) 4/9/2022 11:53:58 AM (UTC+08:00) |

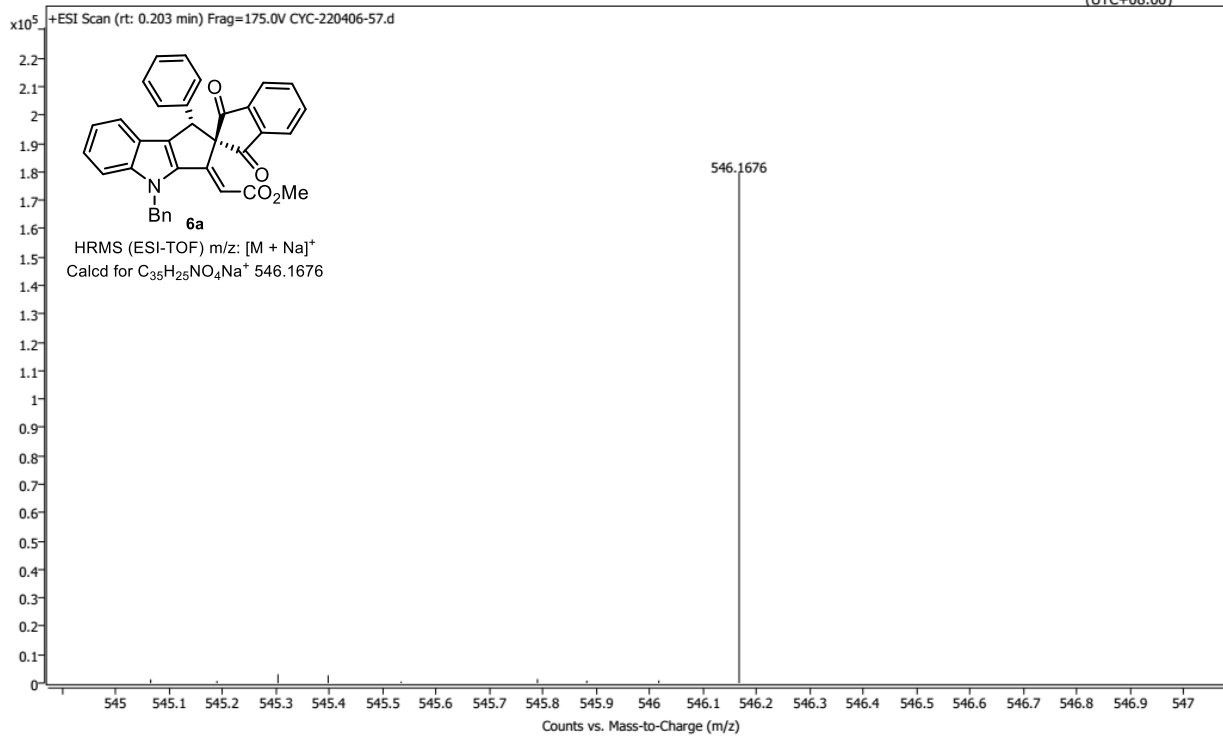

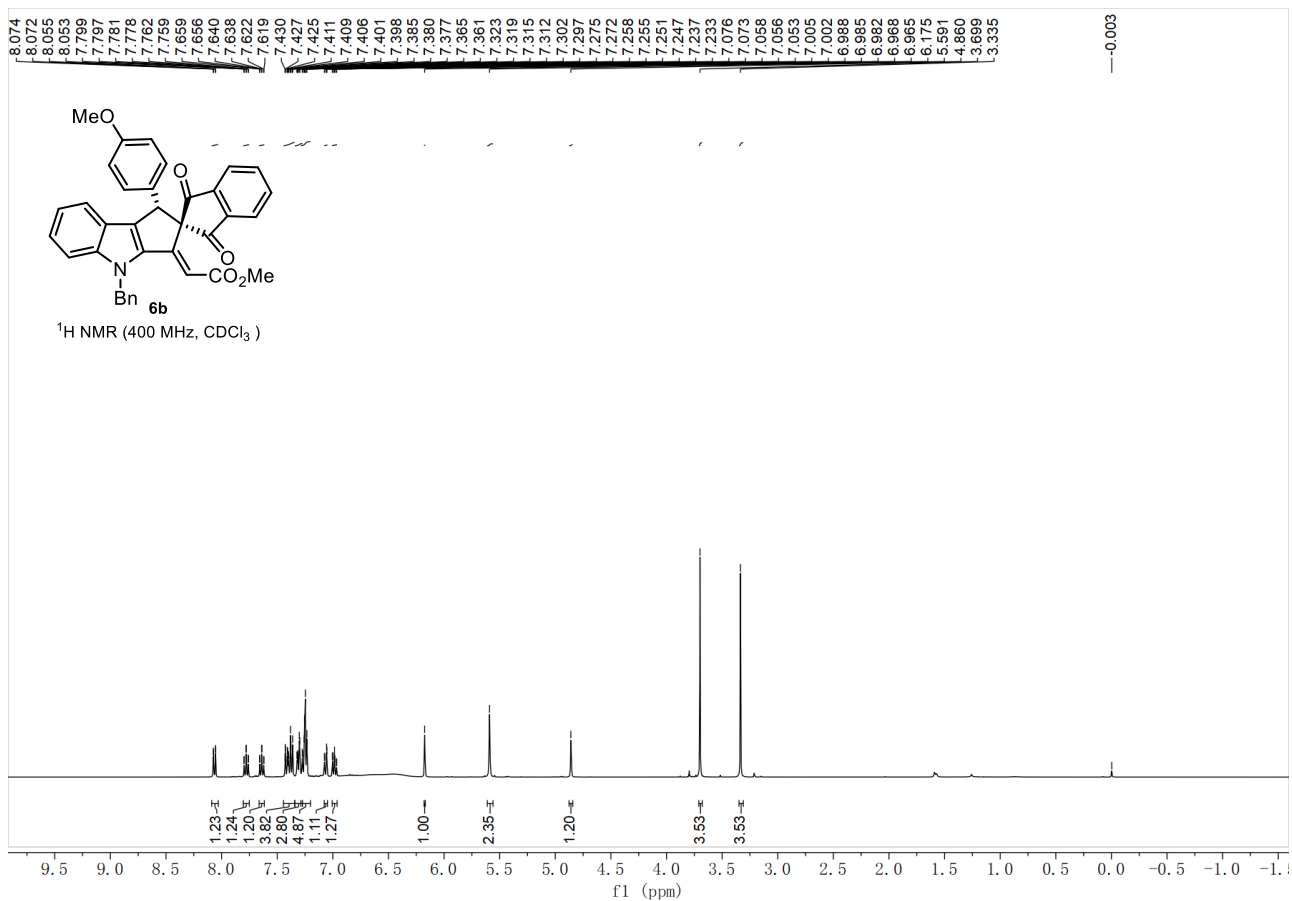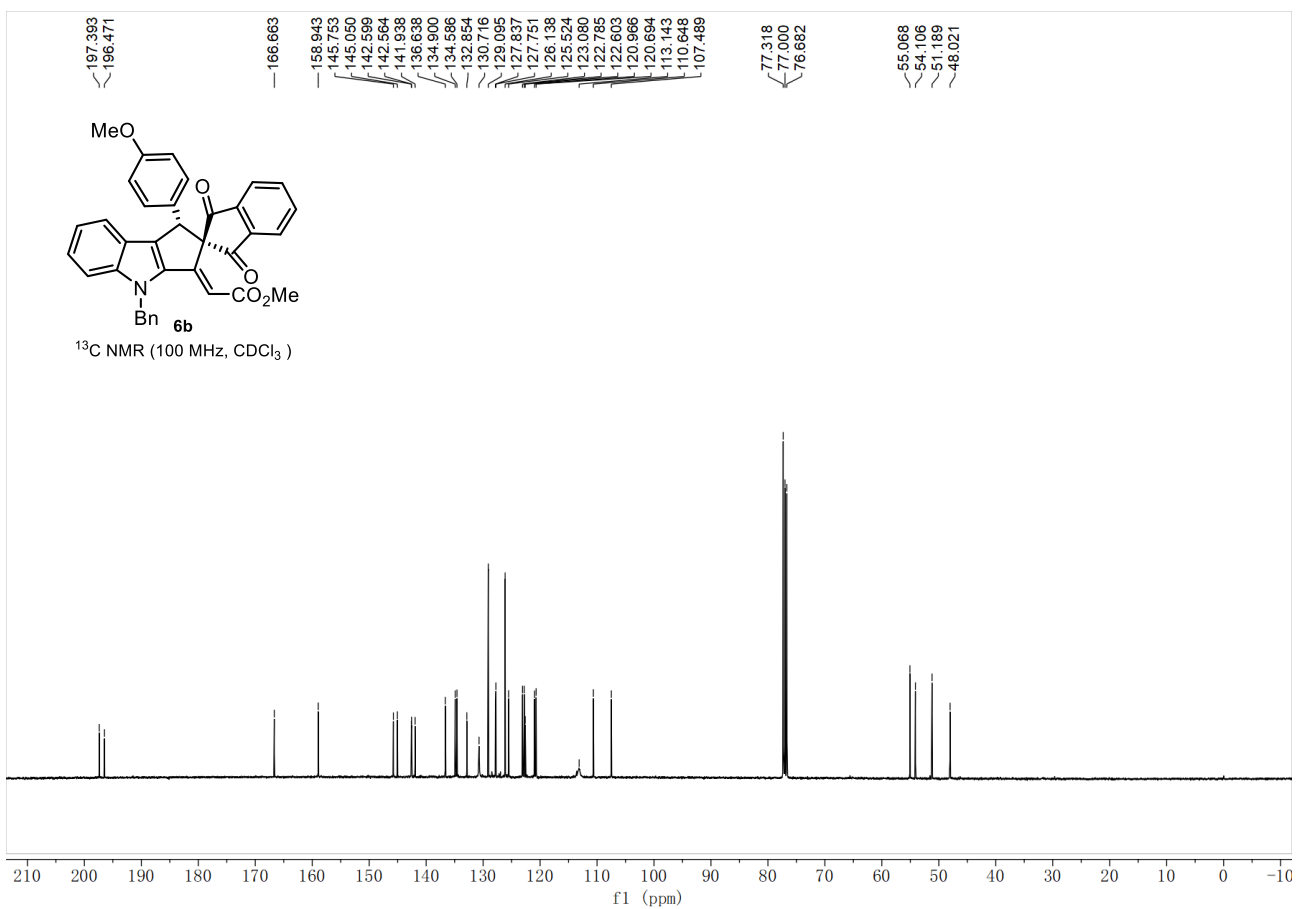

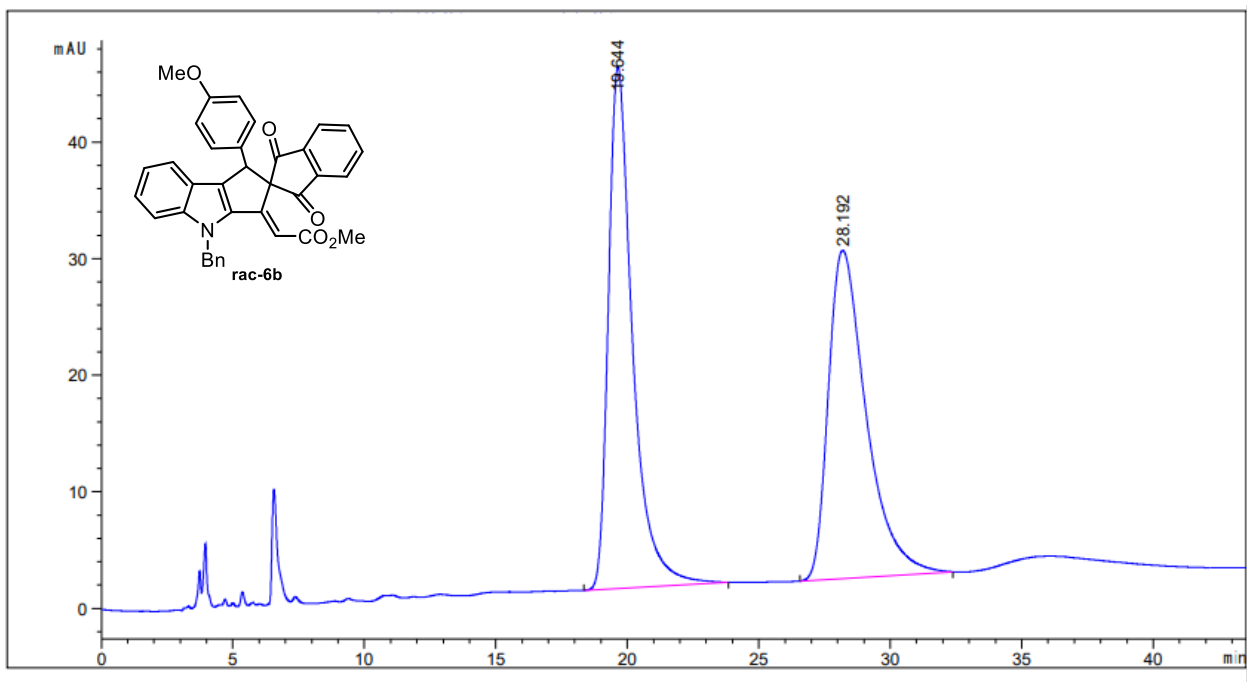

| # | [min]  | [min] | [min]  | [mAU*s]    | [mAU]    | %       |
|---|--------|-------|--------|------------|----------|---------|
| 1 | 19.644 | BB    | 0.9560 | 2860.42334 | 44.71669 | 50.3412 |
| 2 | 28.192 | BB    | 1.4642 | 2821.64746 | 28.16907 | 49.6588 |

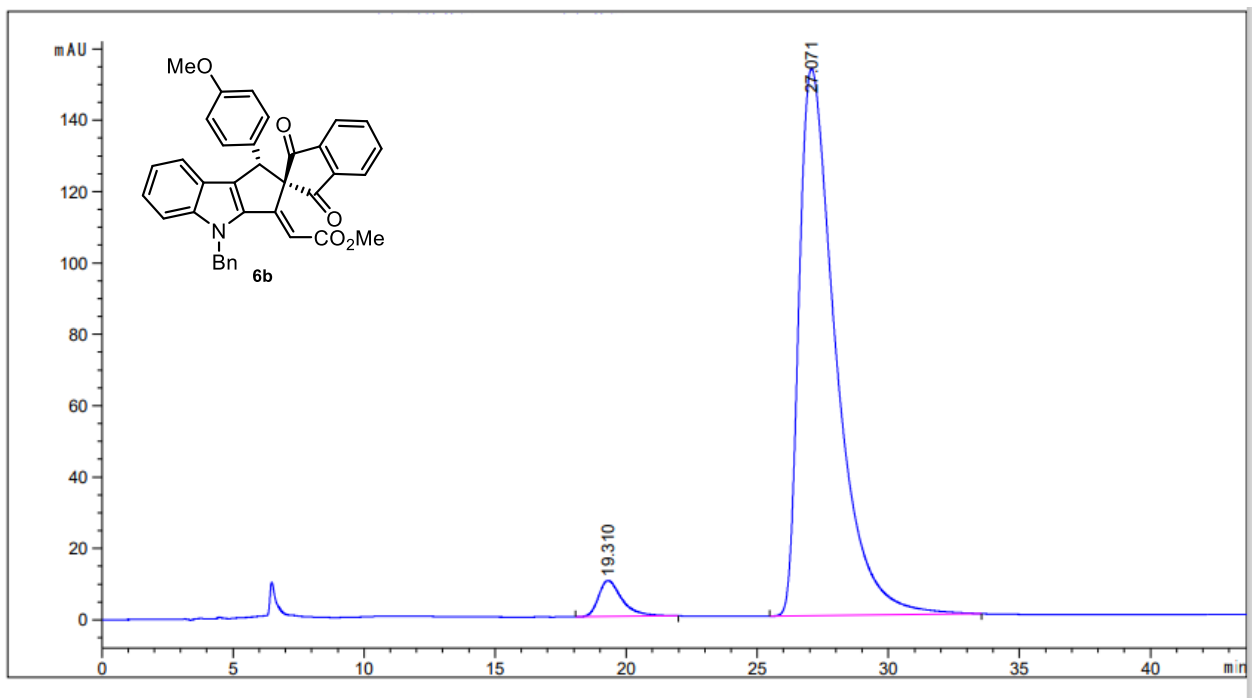

| # | [min]  | [min] | [min]  | [mAU*s]   | [mAU]     | %       |
|---|--------|-------|--------|-----------|-----------|---------|
| 1 | 19.310 | BB    | 0.9240 | 631.48846 | 10.10697  | 4.0553  |
| 2 | 27.071 | BBA   | 1.4501 | 1.49403e4 | 153.30089 | 95.9447 |

|                |                 |              |                |            |              |                   |                                  |
|----------------|-----------------|--------------|----------------|------------|--------------|-------------------|----------------------------------|
| Name           | CYC-220406-58   | Rack Pos.    |                | Instrument | Instrument 1 | Operator          |                                  |
| Inj. Vol. (ul) | 8               | Plate Pos.   |                | IRM Status | Success      |                   |                                  |
| Data File      | CYC-220406-58.d | Method (Acq) | ZYJ-20201106.m | Comment    |              | Acq. Time (Local) | 4/9/2022 11:56:54 AM (UTC+08:00) |

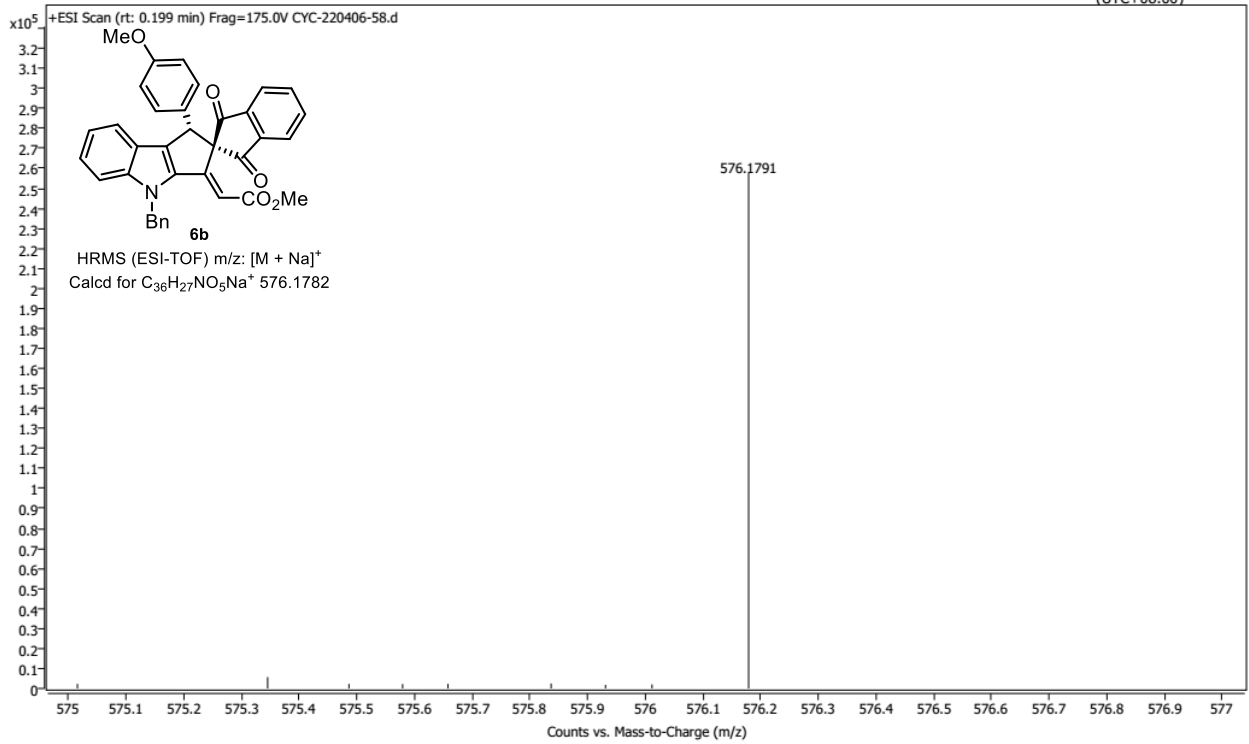

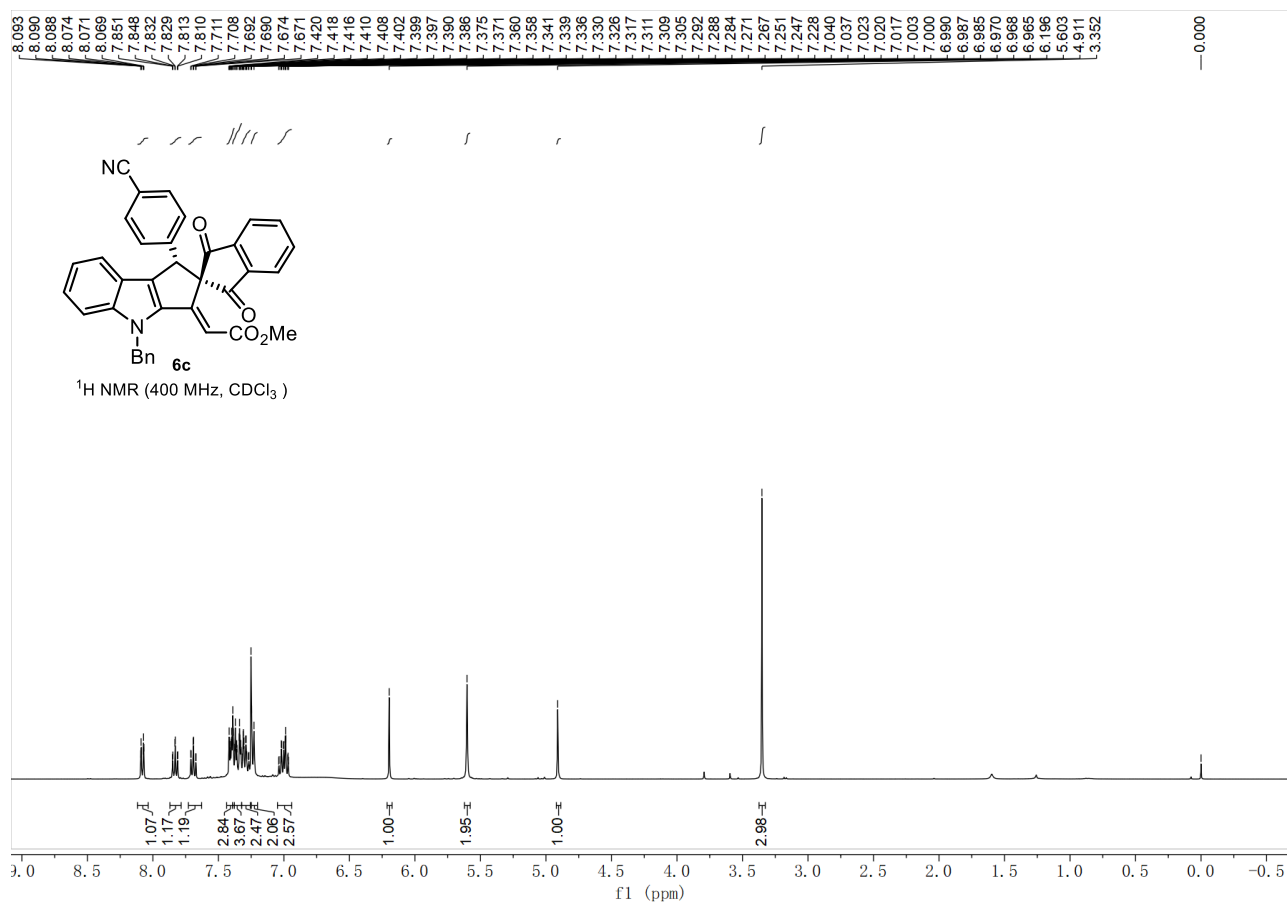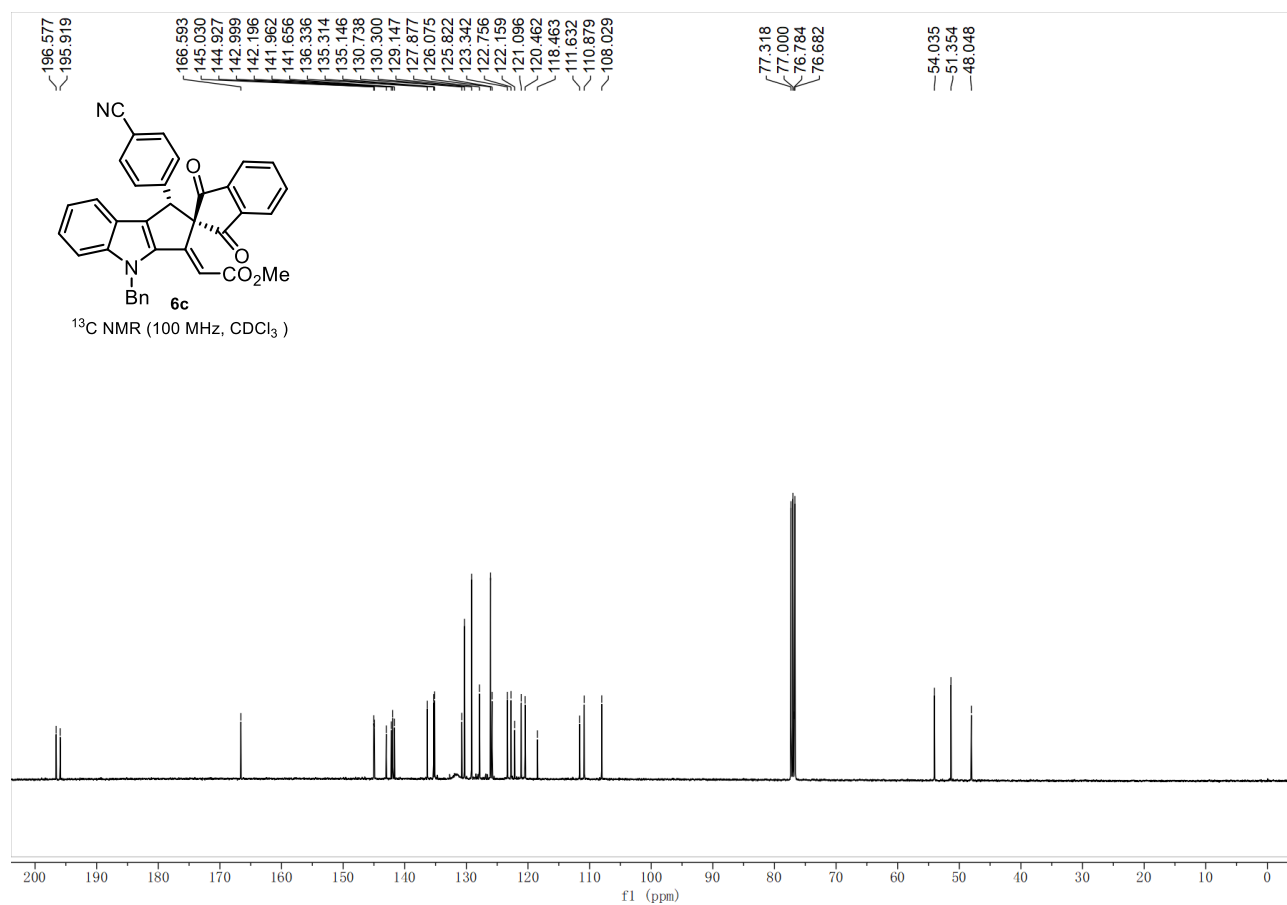

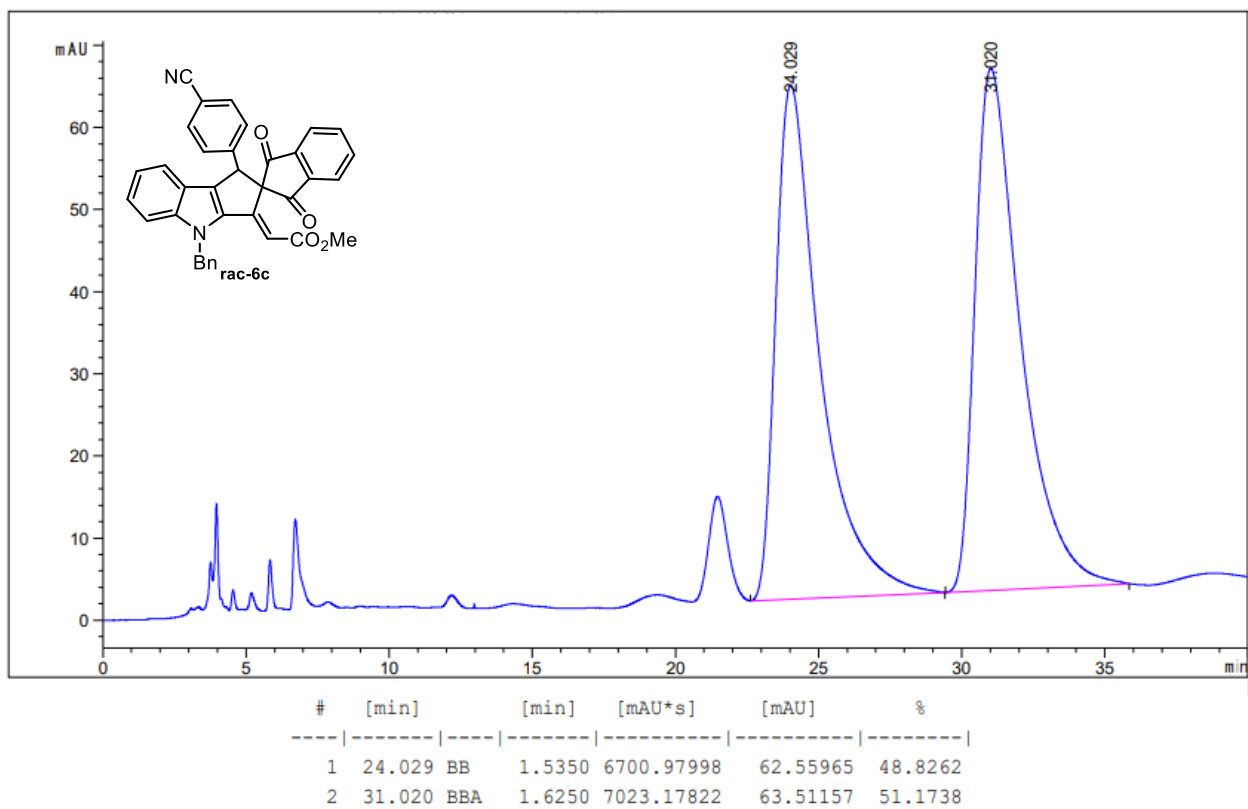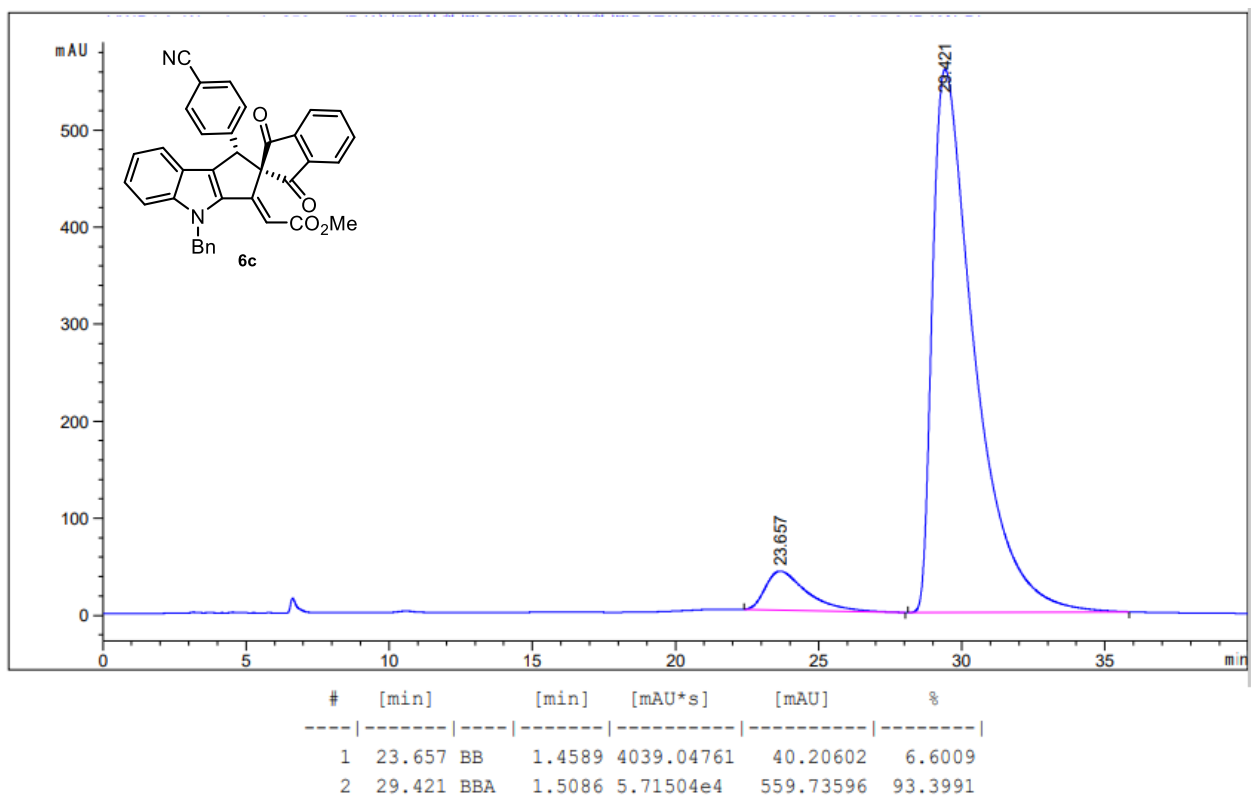

|                |                 |              |                |            |                  |                   |                                  |
|----------------|-----------------|--------------|----------------|------------|------------------|-------------------|----------------------------------|
| Name           | CYC-220406-59   | Rack Pos.    |                | Instrument | Instrument 1     | Operator          |                                  |
| Inj. Vol. (ul) | 8               | Plate Pos.   |                | IRM Status | Some ions missed |                   |                                  |
| Data File      | CYC-220406-59.d | Method (Acq) | ZYJ-20201106.m | Comment    |                  | Acq. Time (Local) | 4/9/2022 11:59:51 AM (UTC+08:00) |

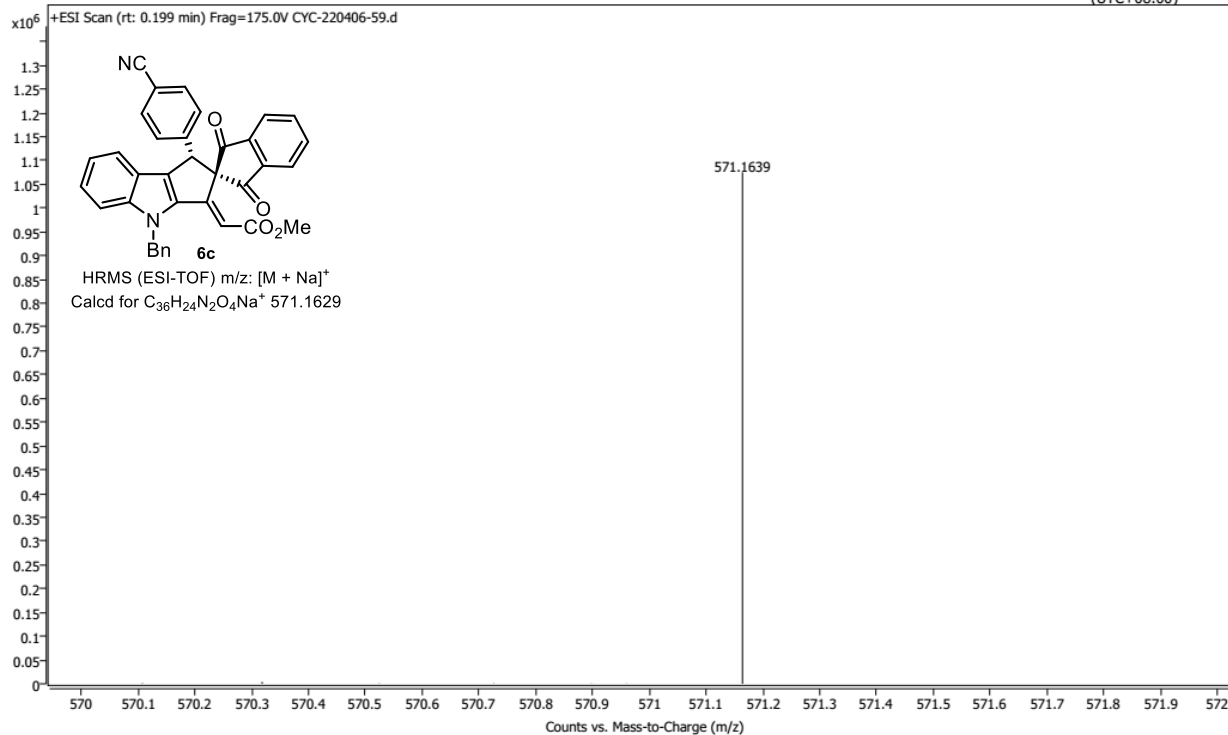

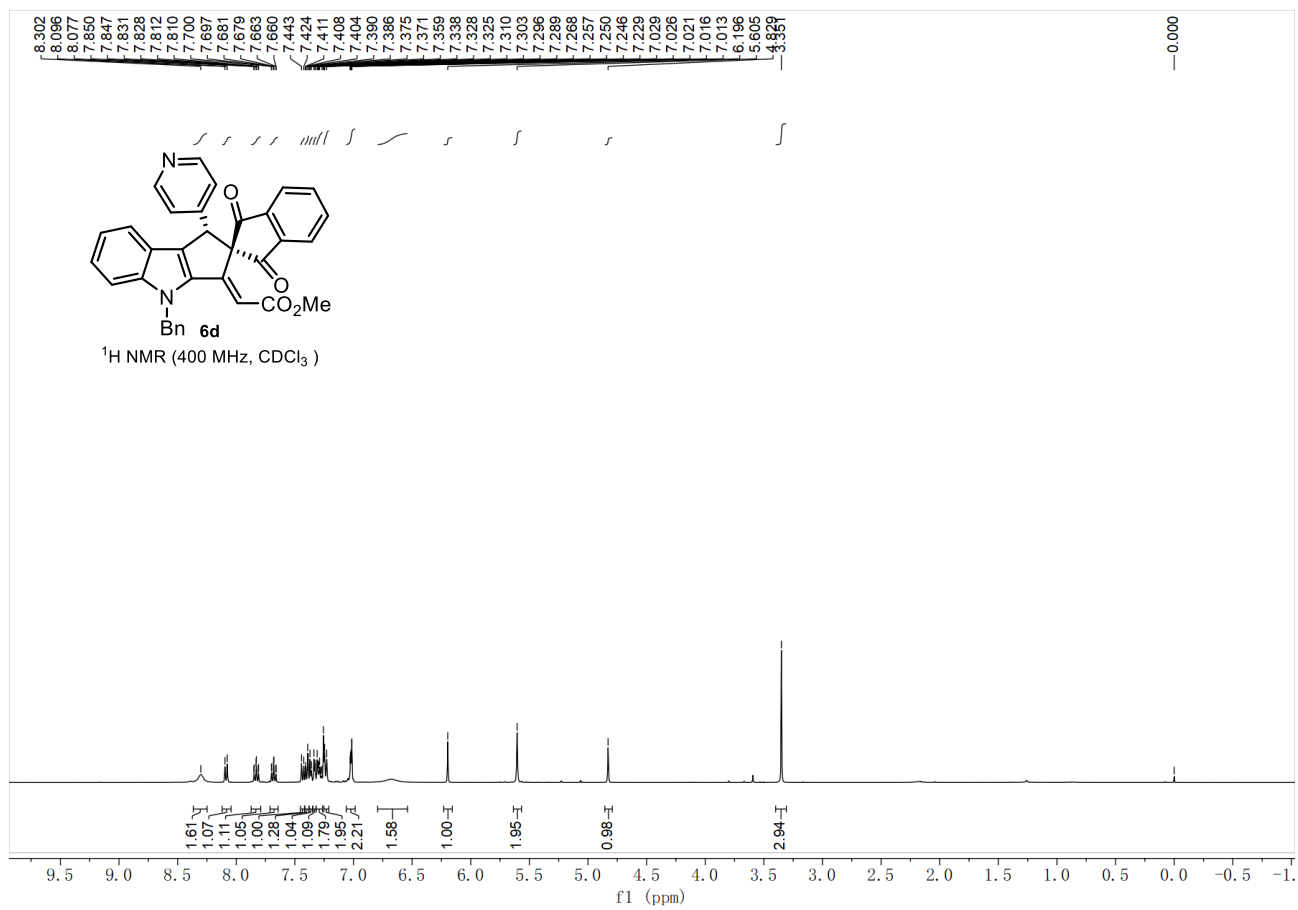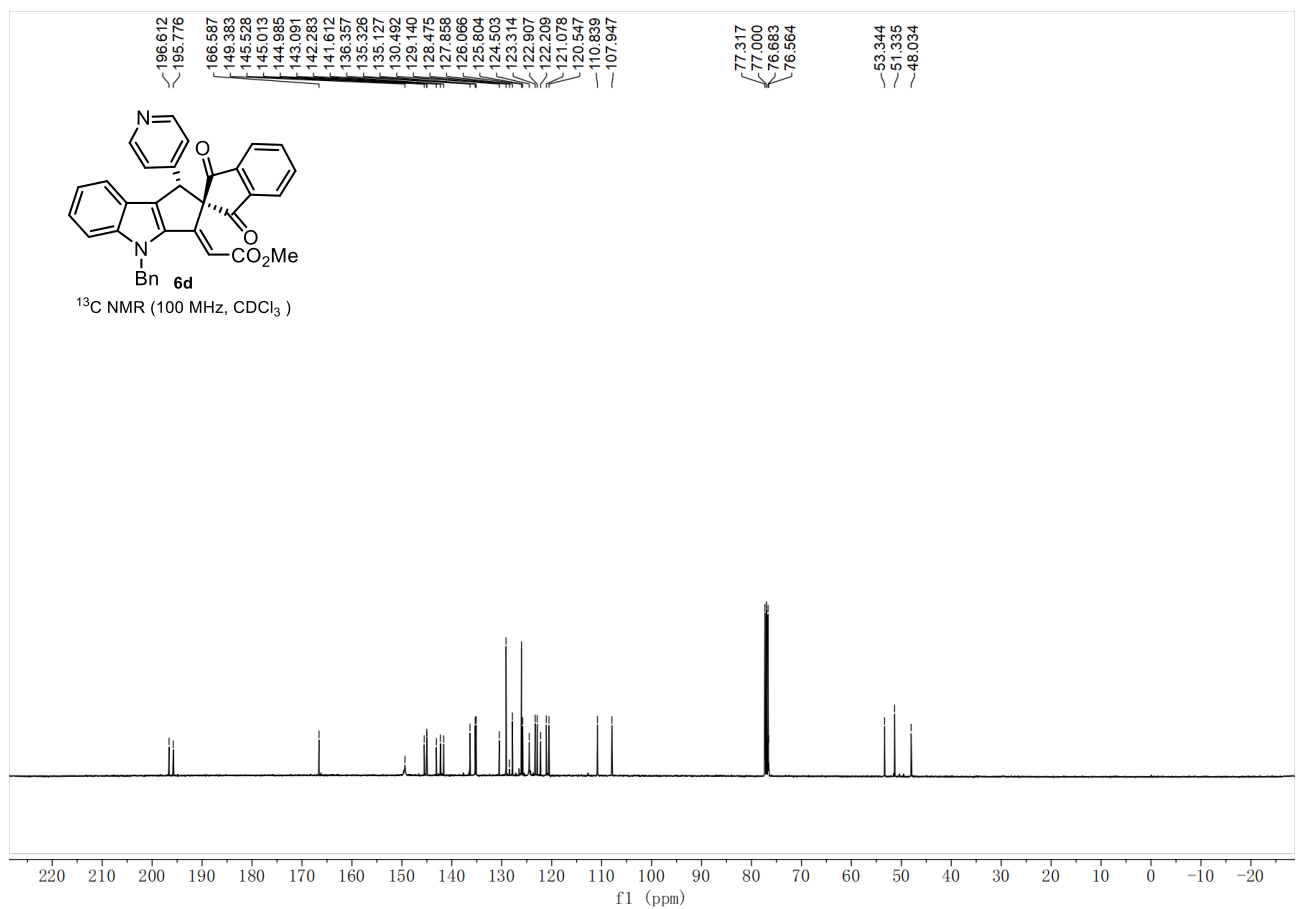



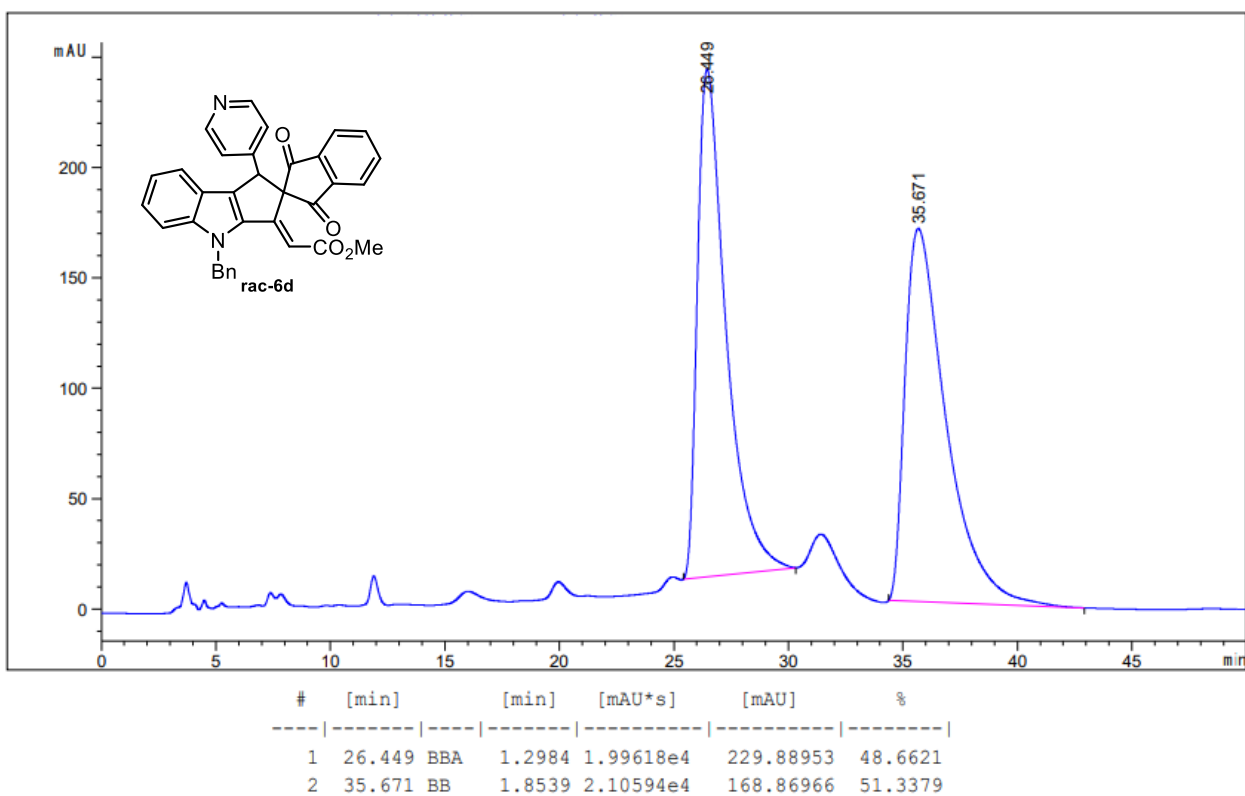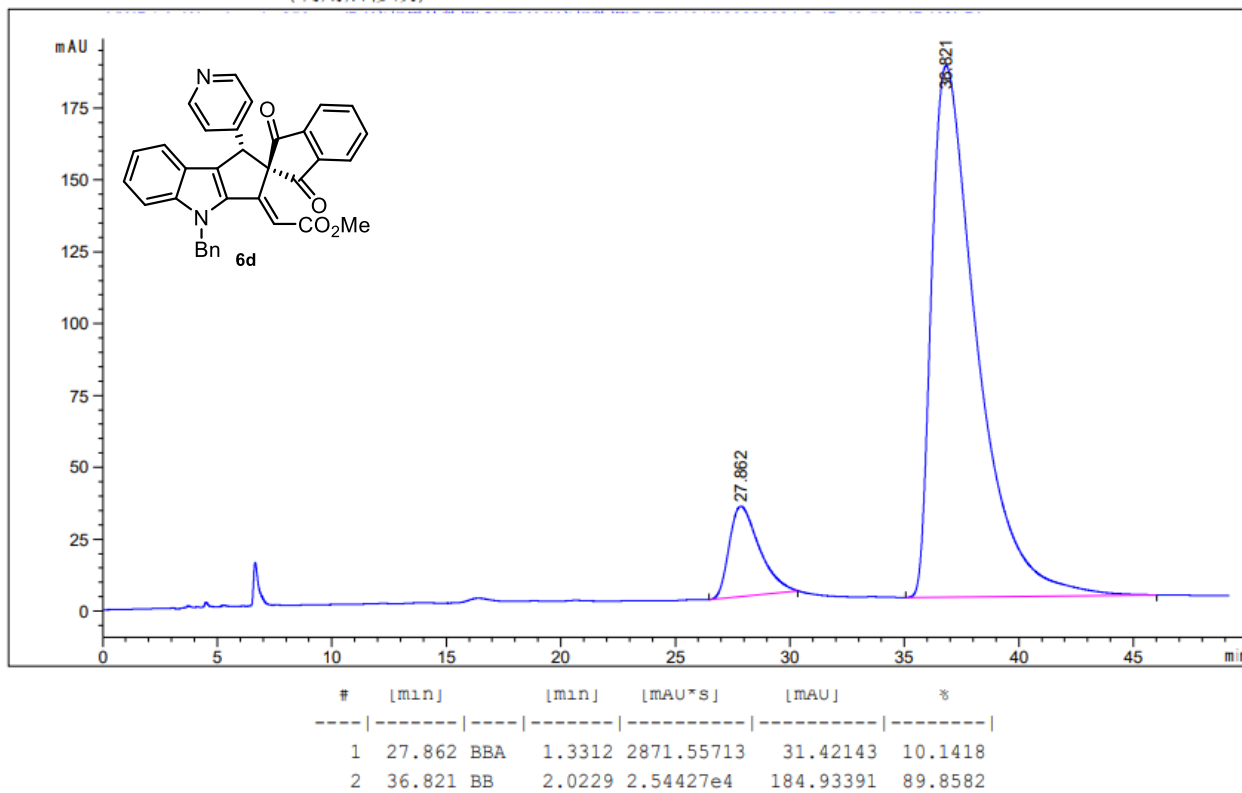

|                |                 |              |                |            |                  |                   |                                     |
|----------------|-----------------|--------------|----------------|------------|------------------|-------------------|-------------------------------------|
| Name           | CYC-220406-60   | Rack Pos.    |                | Instrument | Instrument 1     | Operator          |                                     |
| Inj. Vol. (ul) | 8               | Plate Pos.   |                | IRM Status | Some ions missed |                   |                                     |
| Data File      | CYC-220406-60.d | Method (Acq) | ZYJ-20201106.m | Comment    |                  | Acq. Time (Local) | 4/9/2022 12:02:48 PM<br>(UTC+08:00) |

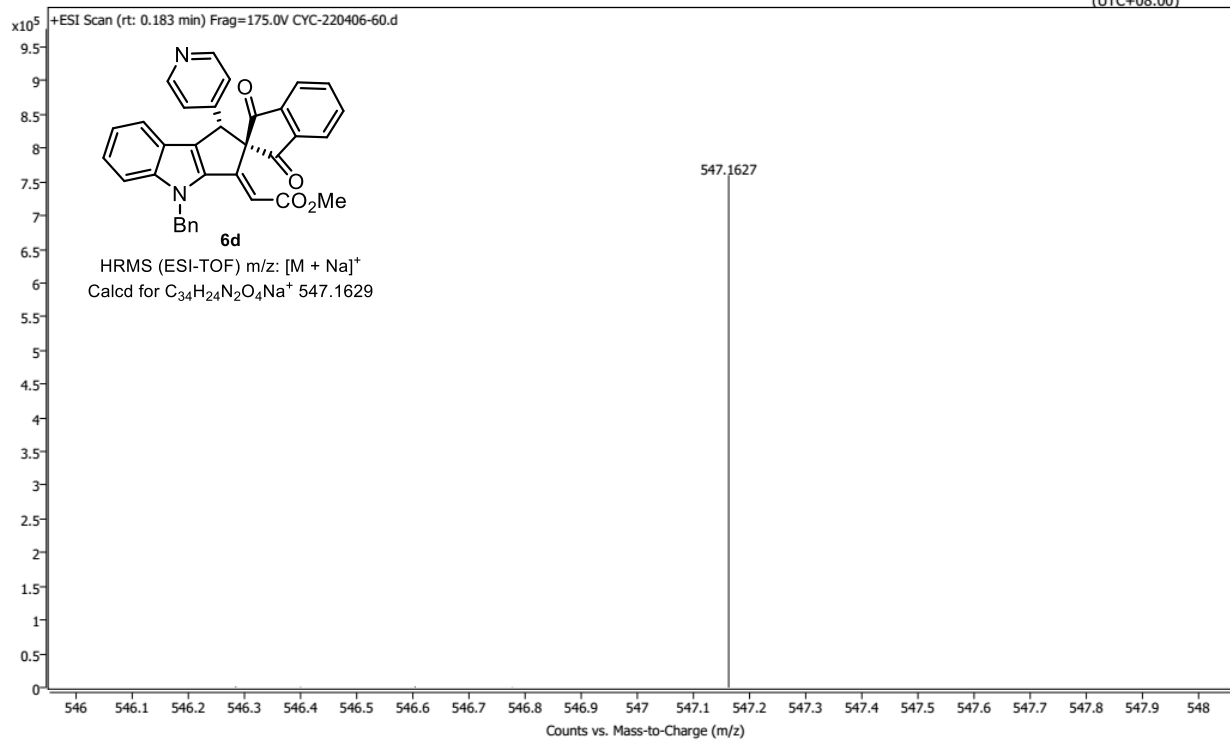

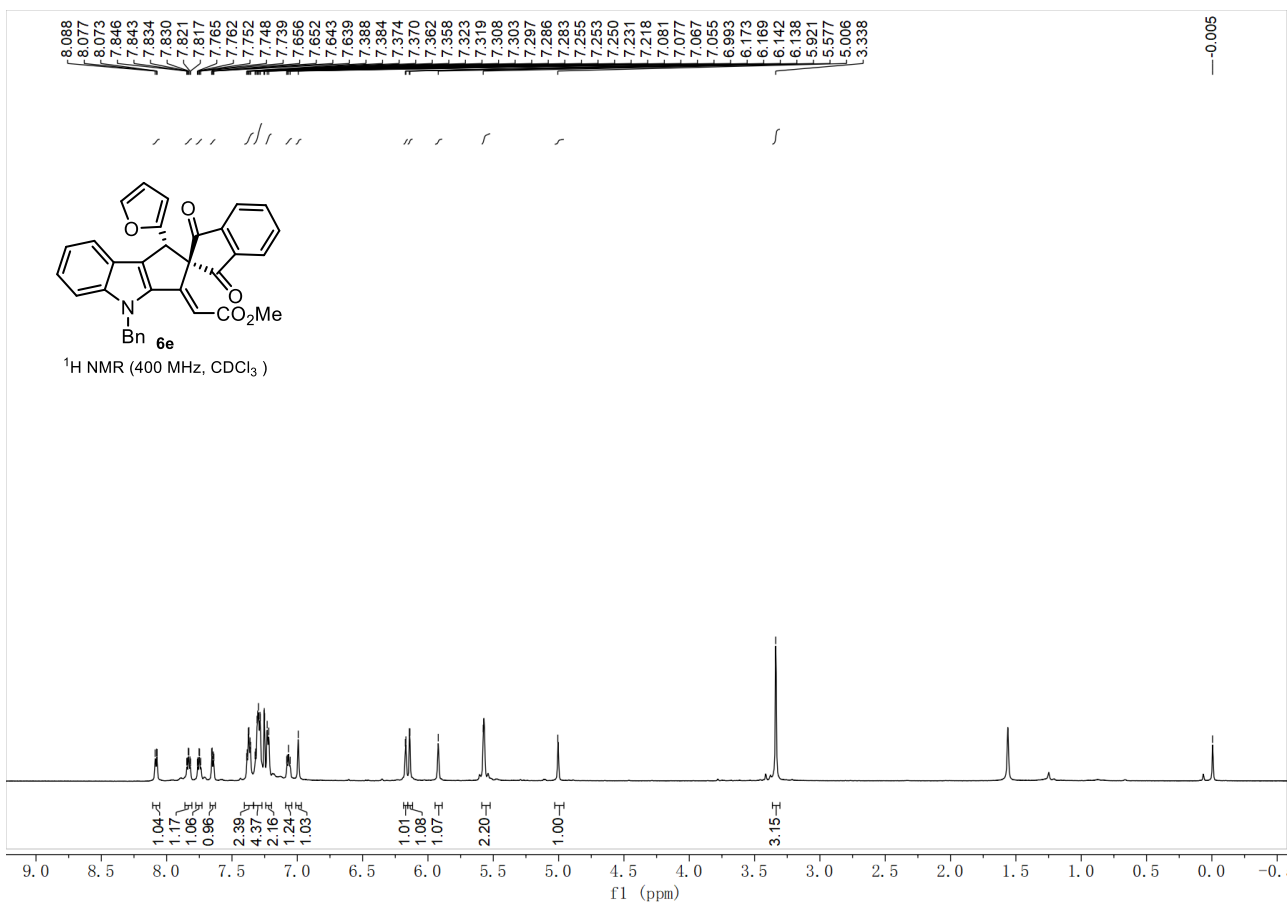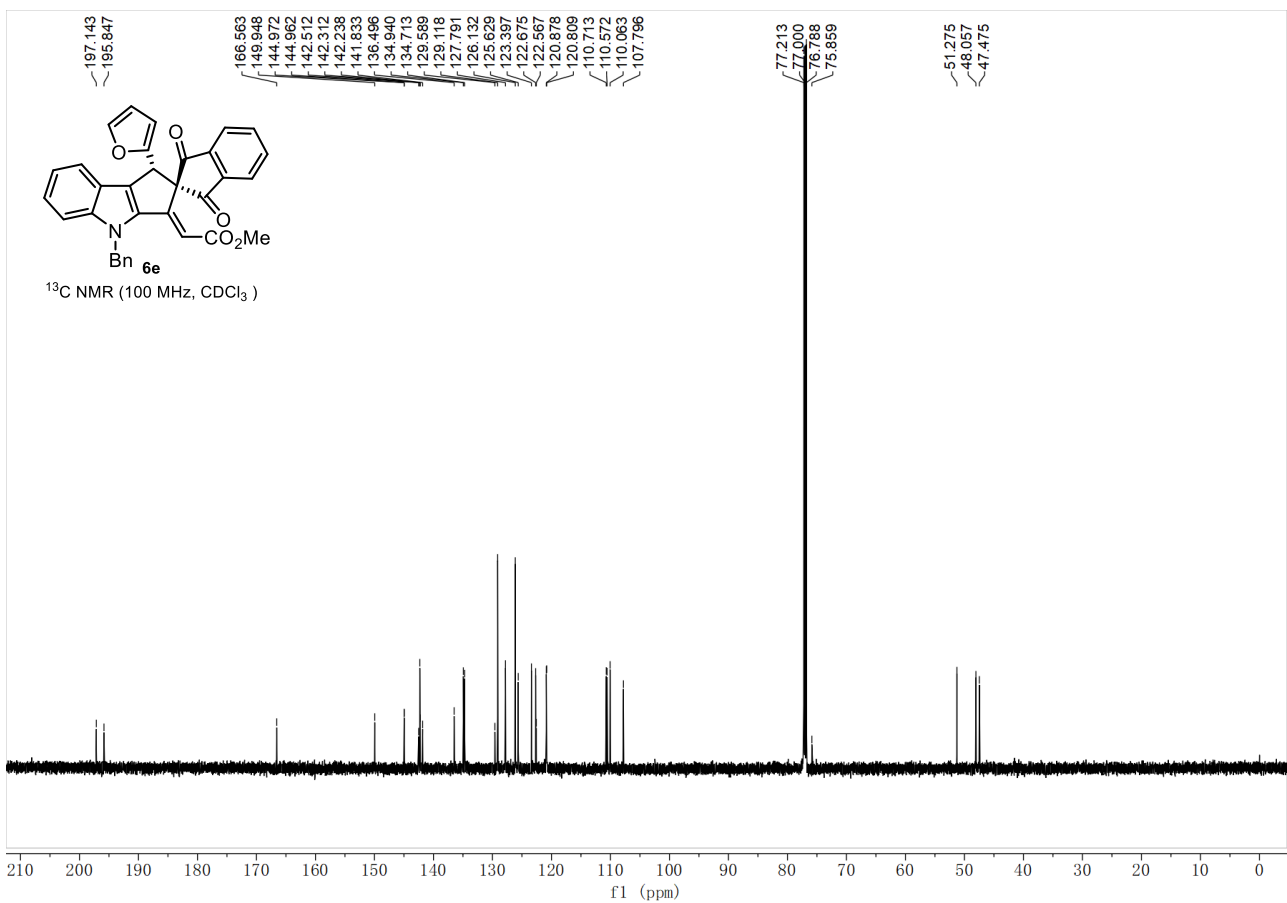

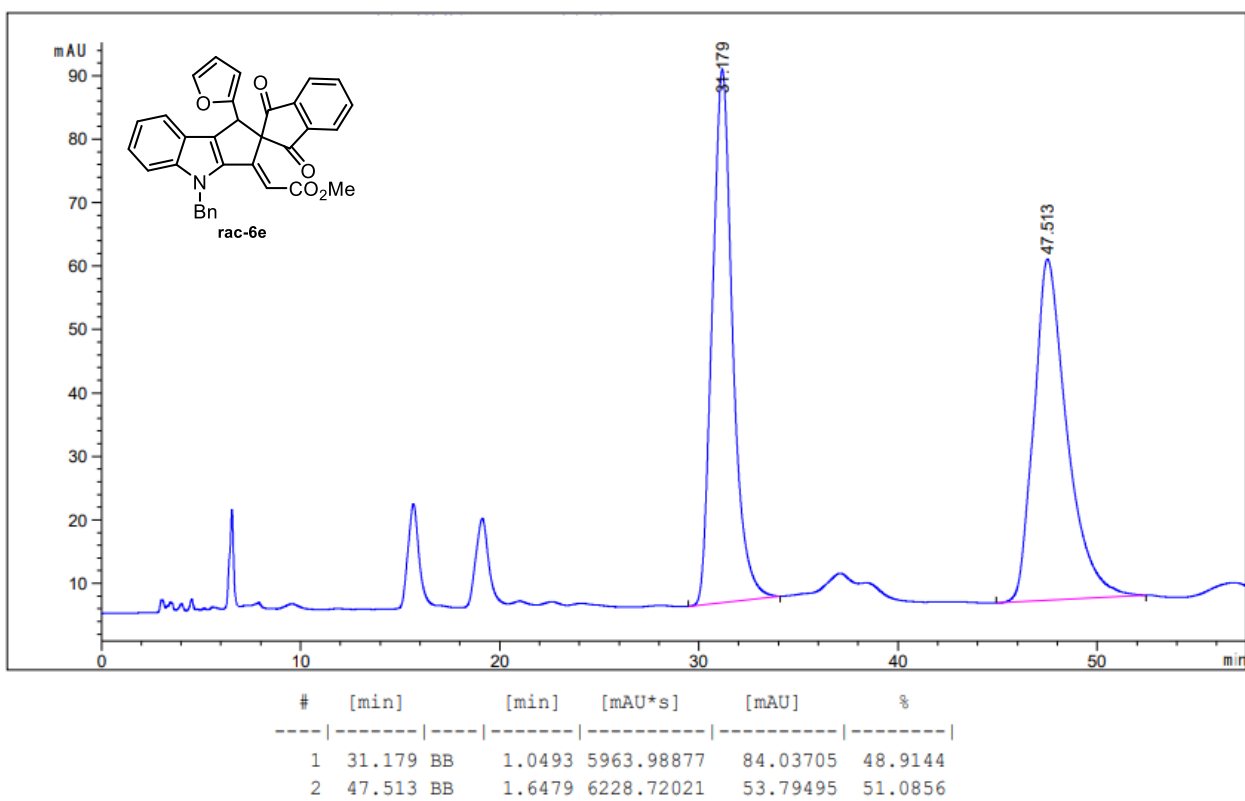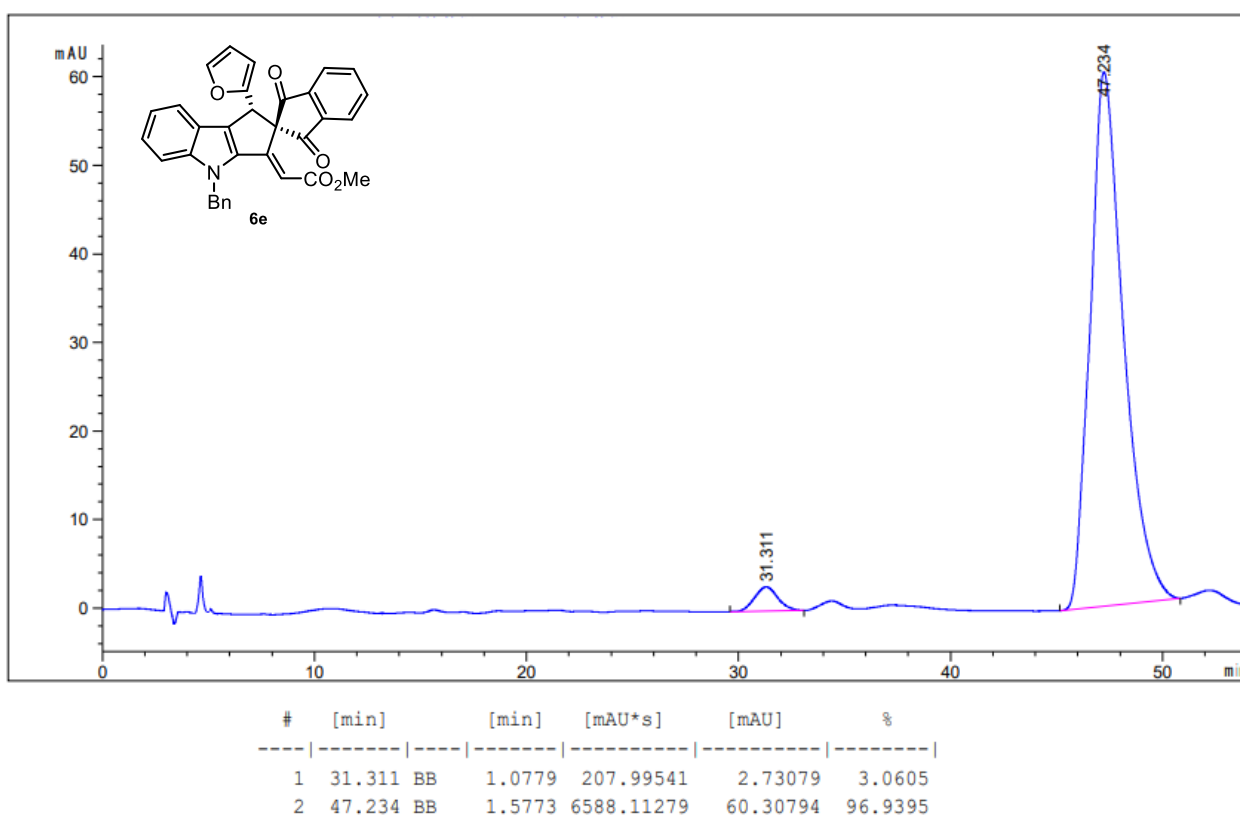

|                |                 |              |                |            |                  |                                                    |
|----------------|-----------------|--------------|----------------|------------|------------------|----------------------------------------------------|
| Name           | CYC-220406-61   | Rack Pos.    |                | Instrument | Instrument 1     | Operator                                           |
| Inj. Vol. (ul) | 8               | Plate Pos.   |                | IRM Status | Some ions missed |                                                    |
| Data File      | CYC-220406-61.d | Method (Acq) | ZYJ-20201106.m | Comment    |                  | Acq. Time (Local) 4/9/2022 12:05:45 PM (UTC+08:00) |

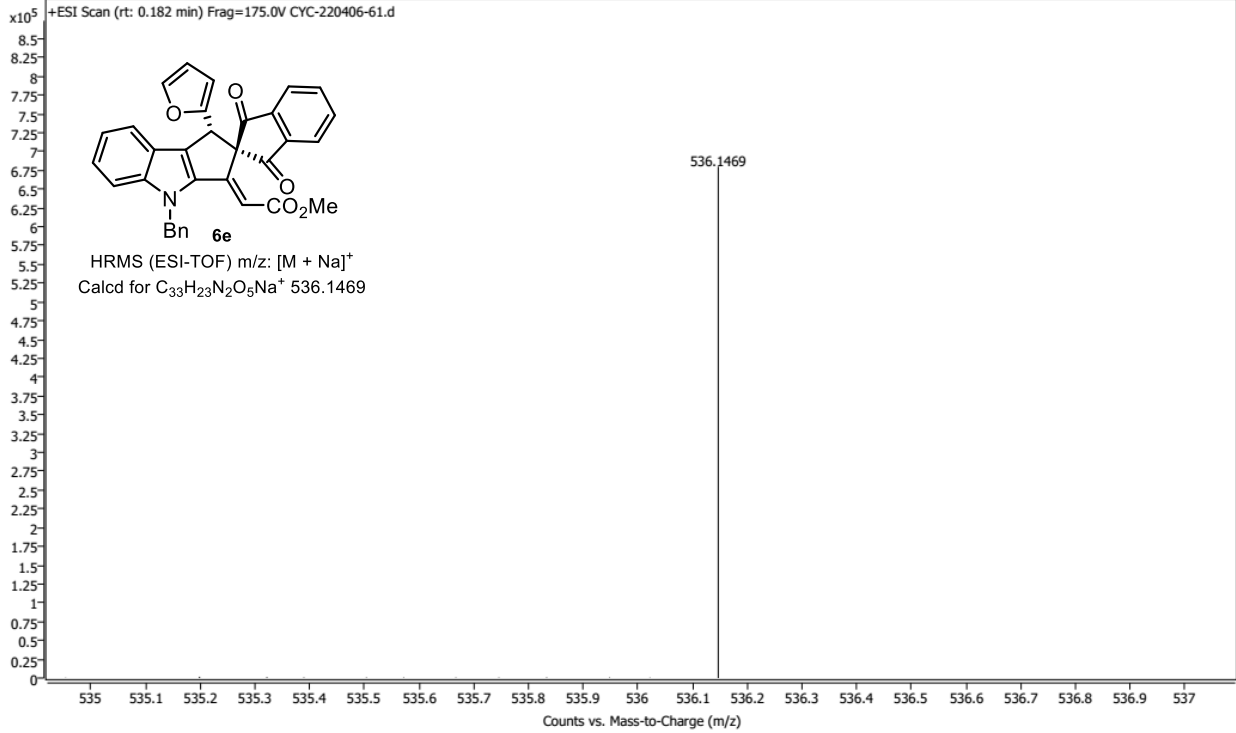

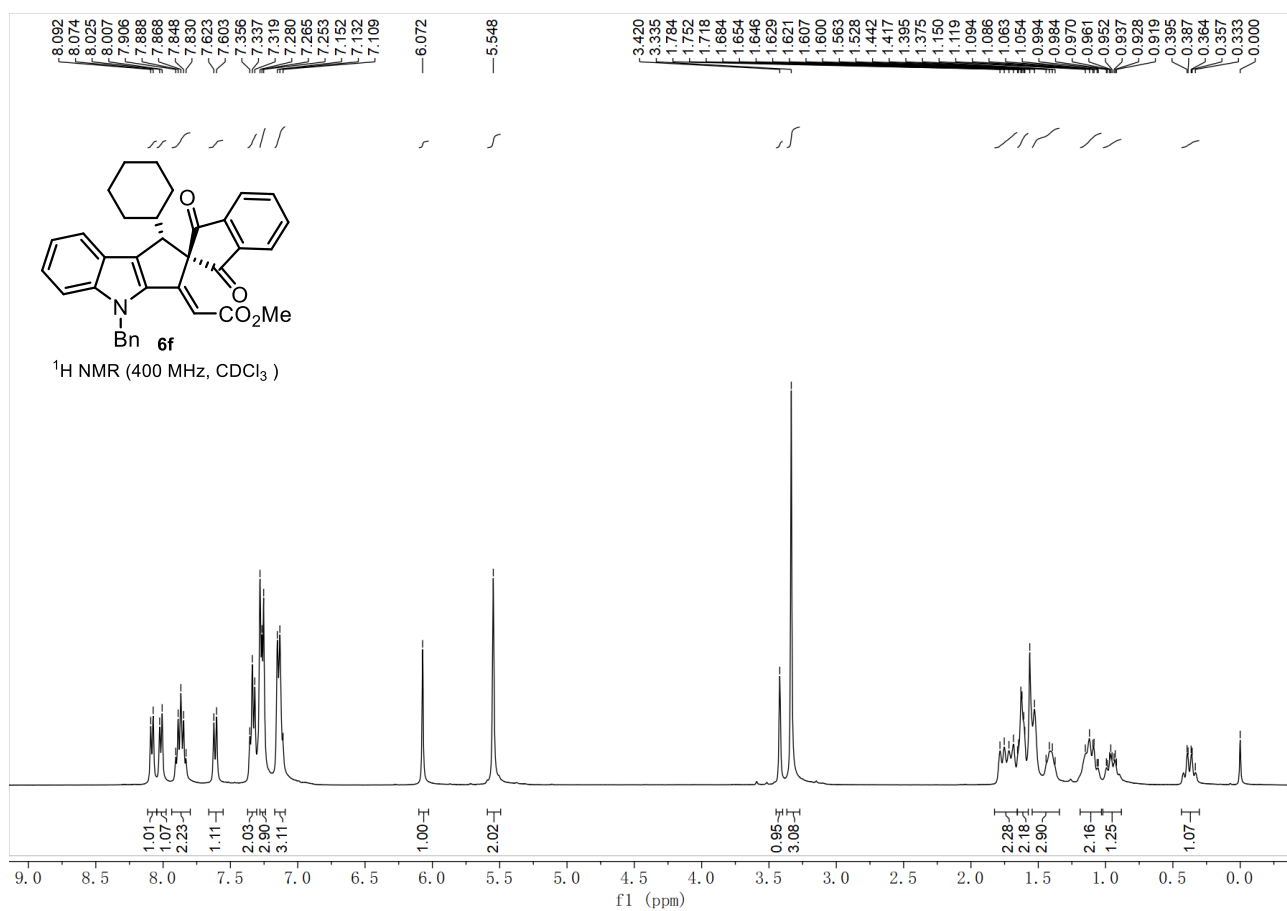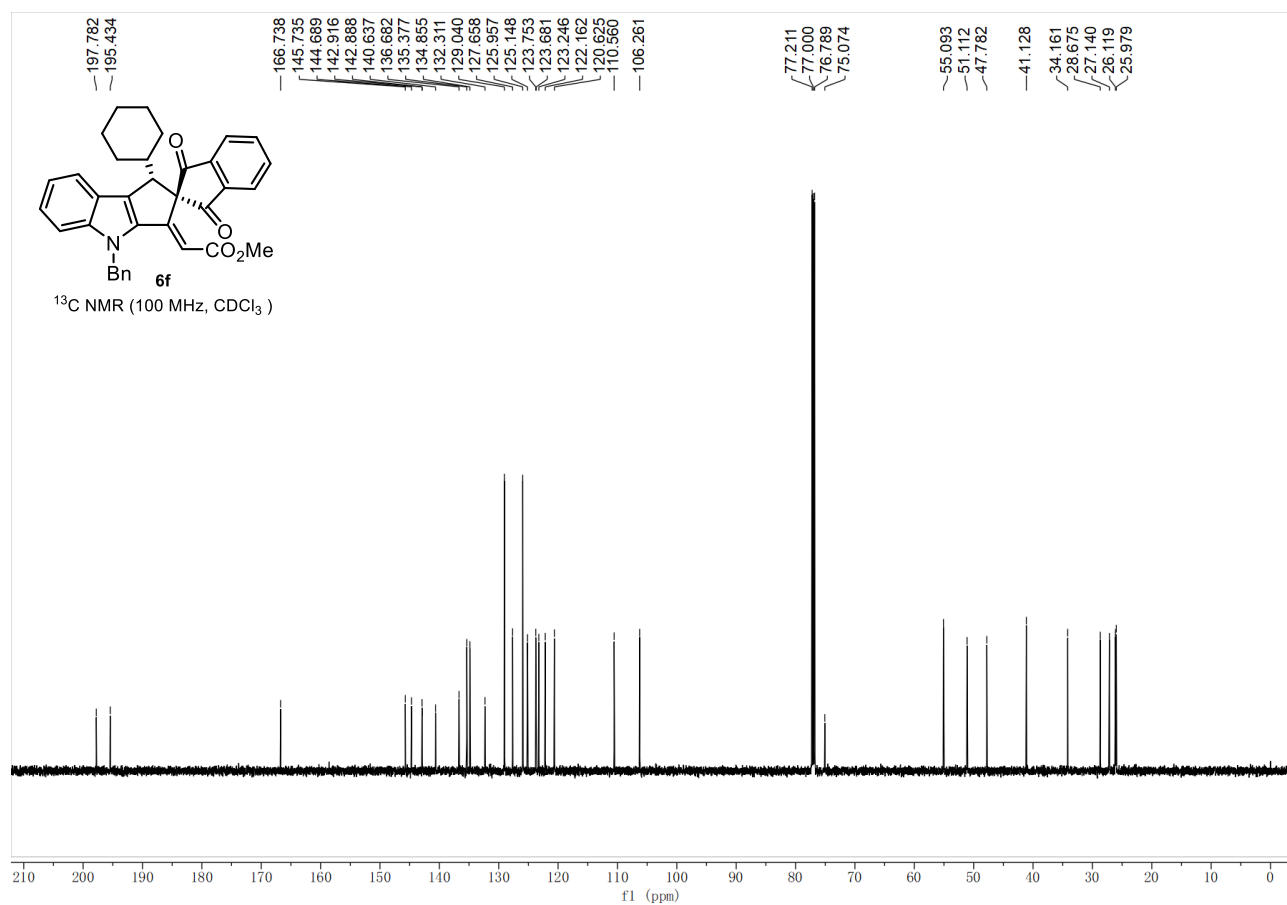

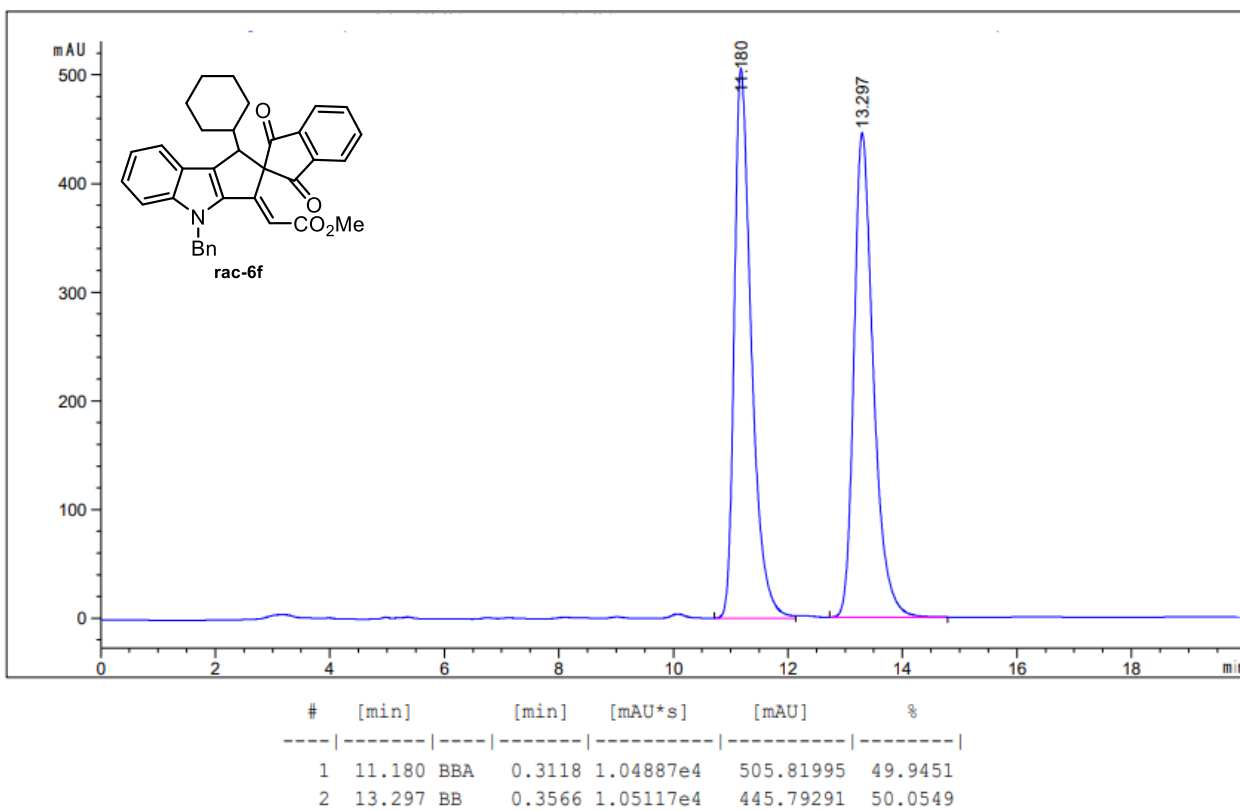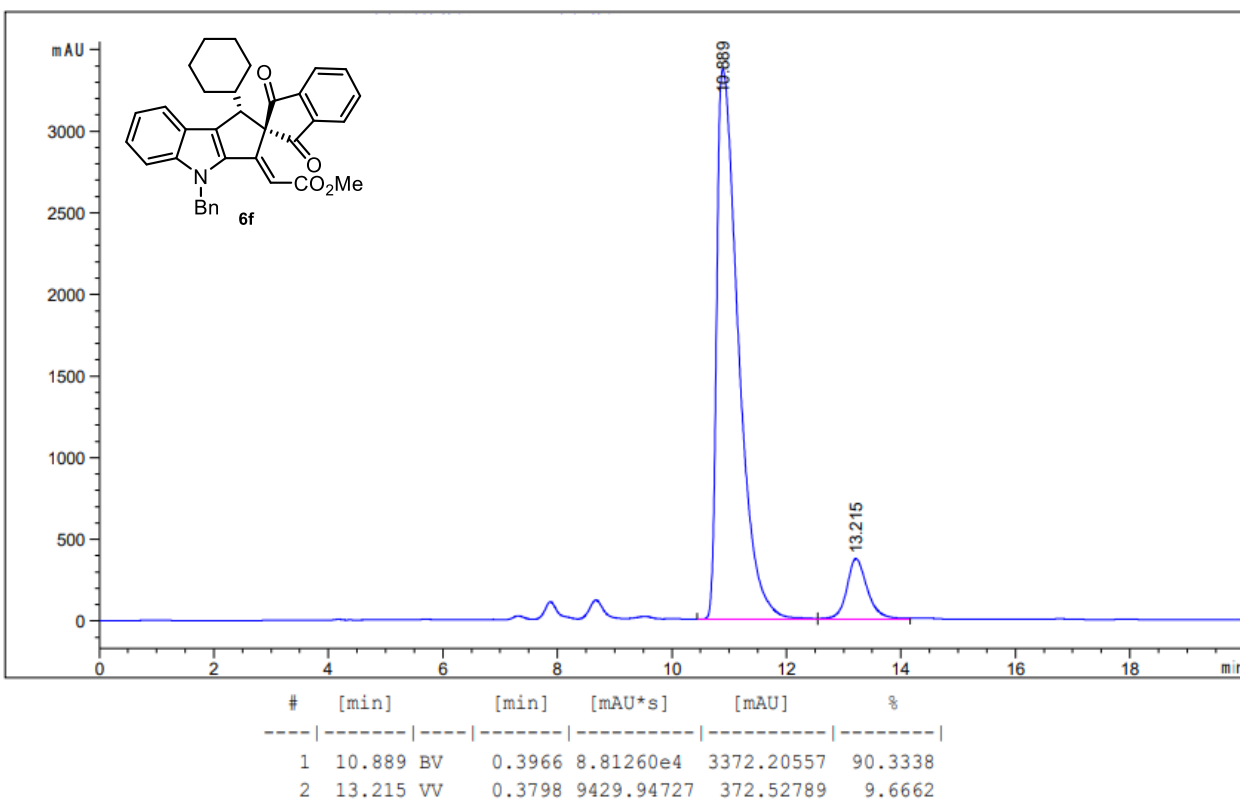

|                |                 |              |                |            |                  |                   |                                  |
|----------------|-----------------|--------------|----------------|------------|------------------|-------------------|----------------------------------|
| Name           | CYC-220406-62   | Rack Pos.    |                | Instrument | Instrument 1     | Operator          |                                  |
| Inj. Vol. (ul) | 8               | Plate Pos.   |                | IRM Status | Some ions missed |                   |                                  |
| Data File      | CYC-220406-62.d | Method (Acq) | ZYJ-20201106.m | Comment    |                  | Acq. Time (Local) | 4/9/2022 12:08:42 PM (UTC+08:00) |

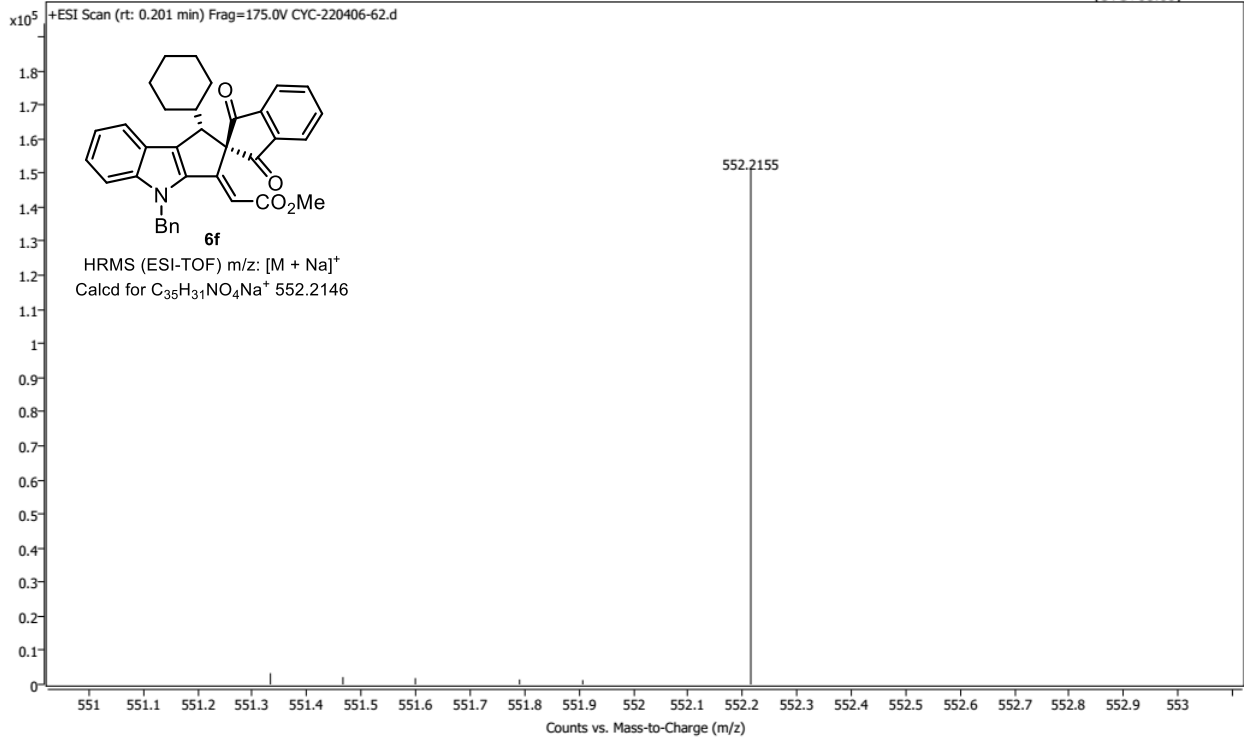



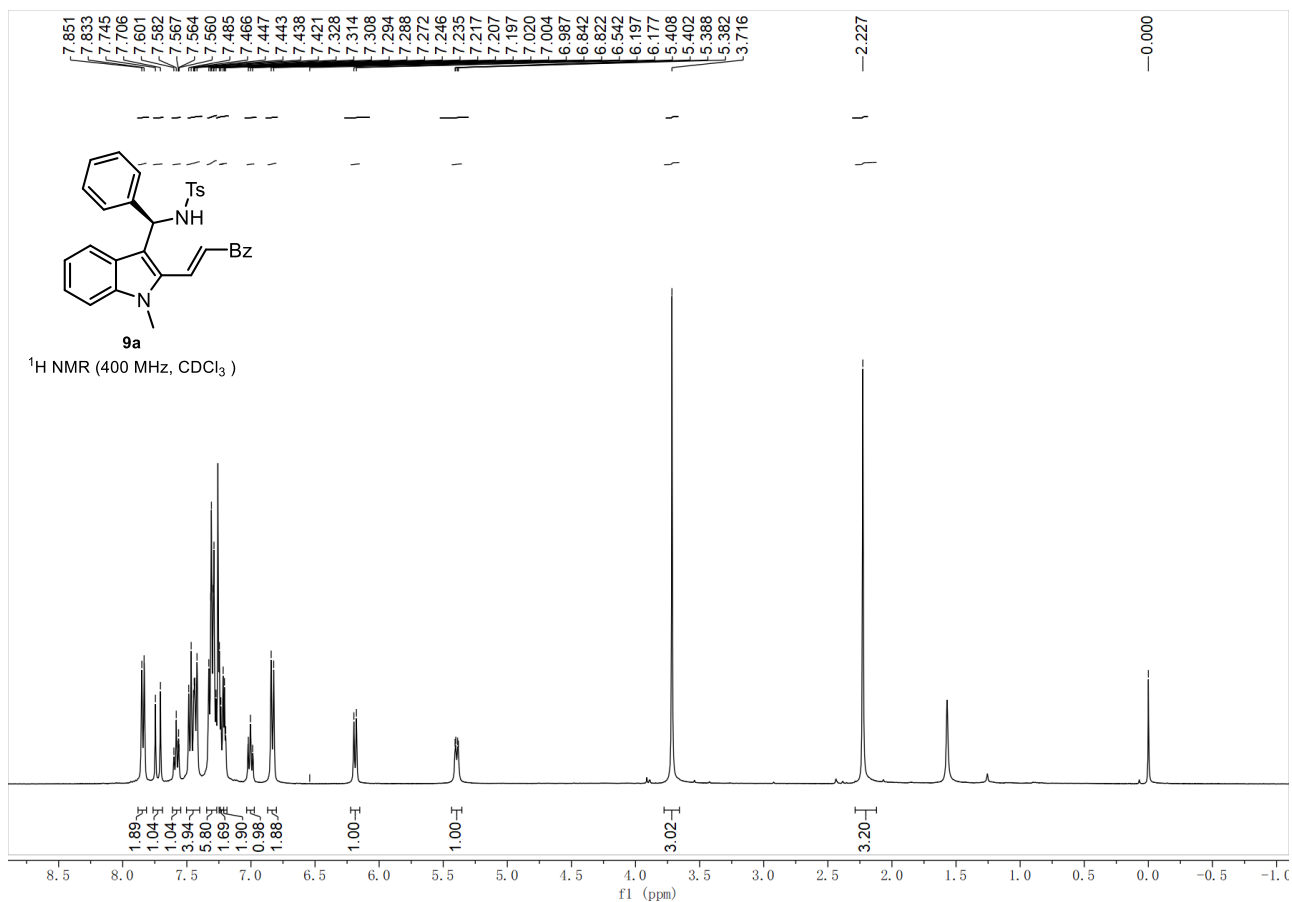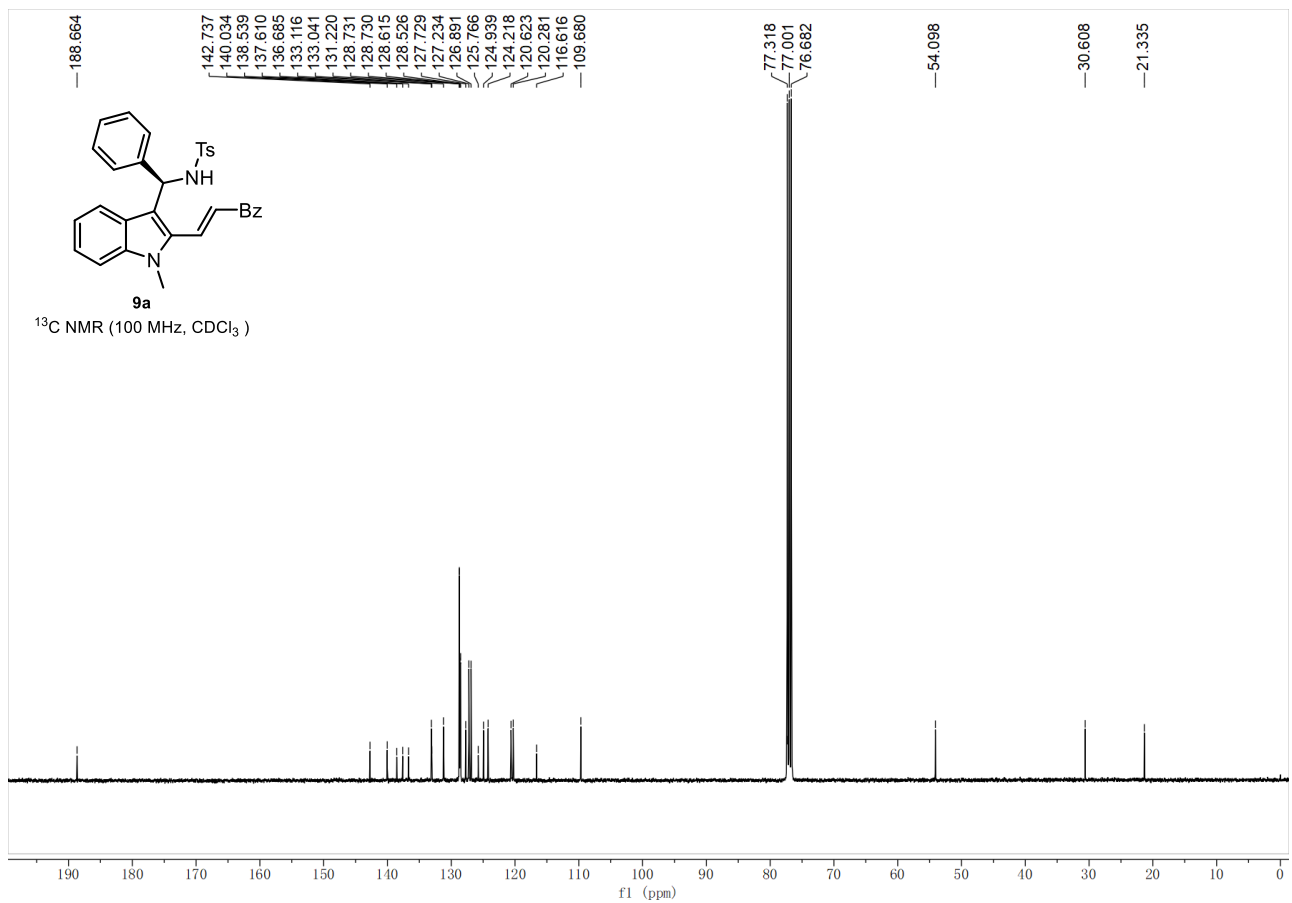

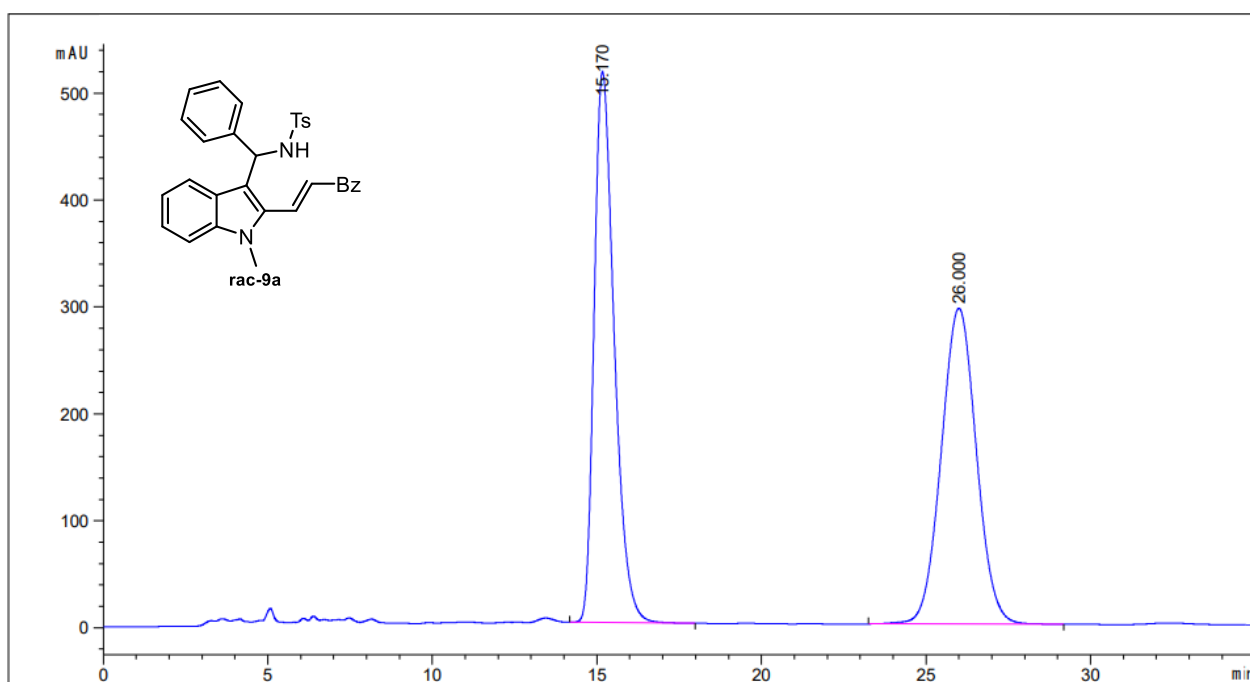

| # | [min]  | [min] | [mAU*s] | [mAU]     | %         |         |
|---|--------|-------|---------|-----------|-----------|---------|
| 1 | 15.170 | BB    | 0.6499  | 2.18285e4 | 515.45807 | 49.9173 |
| 2 | 26.000 | BBA   | 1.1533  | 2.19008e4 | 295.38242 | 50.0827 |

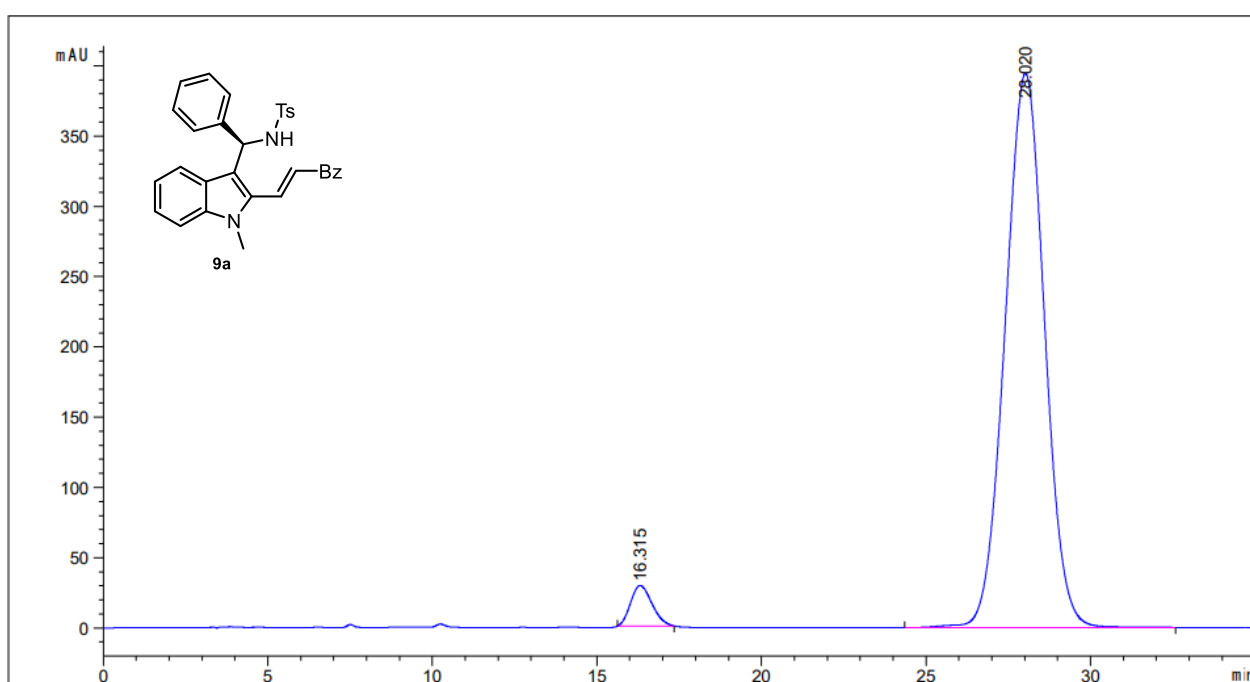

| # | [min]  | [min] | [mAU*s] | [mAU]      | %         |         |
|---|--------|-------|---------|------------|-----------|---------|
| 1 | 16.315 | BBA   | 0.7081  | 1307.49438 | 28.91422  | 3.8330  |
| 2 | 28.020 | BB    | 1.2968  | 3.28044e4  | 394.28125 | 96.1670 |

|                |                  |              |                |              |                                                     |
|----------------|------------------|--------------|----------------|--------------|-----------------------------------------------------|
| Name           | CYC-20211122-2   | Rack Pos.    | Instrument     | Instrument 1 | Operator                                            |
| Inj. Vol. (ul) | 8                | Plate Pos.   | IRM Status     | Success      |                                                     |
| Data File      | CYC-20211122-2.d | Method (Acq) | ZYJ-20201106.m | Comment      | Acq. Time (Local) 11/25/2021 4:04:26 PM (UTC+08:00) |

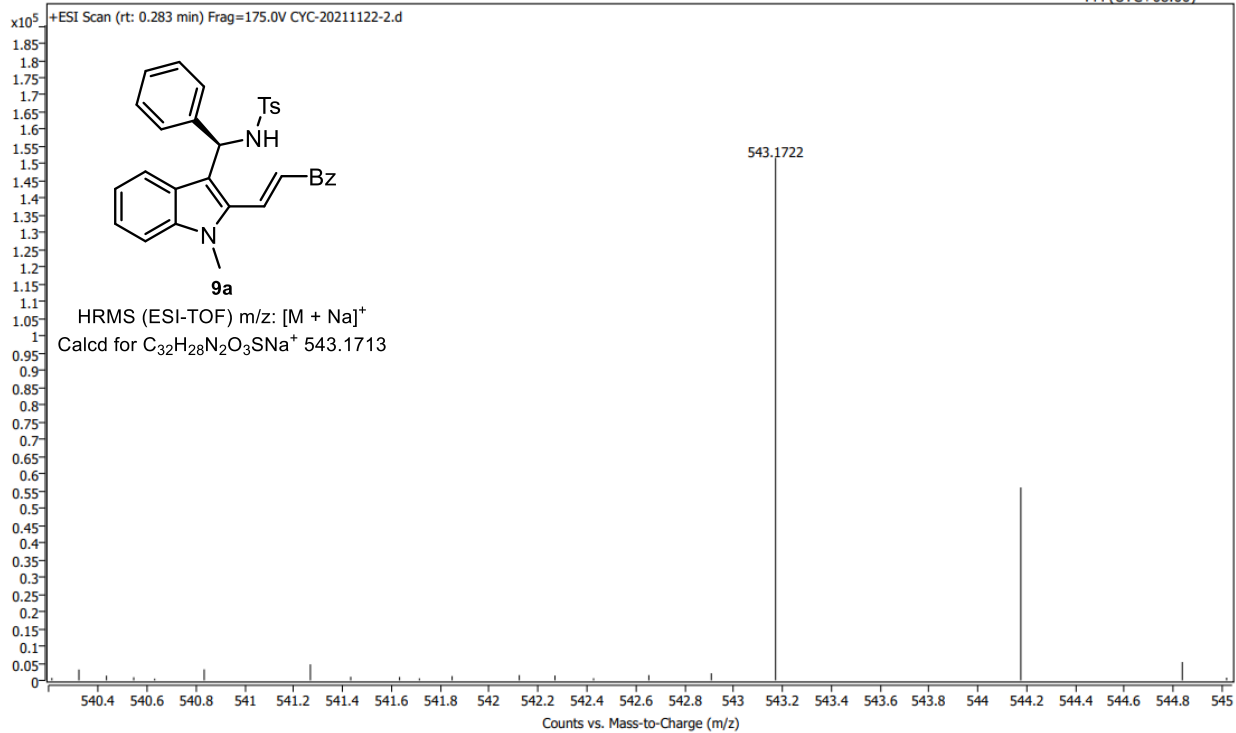

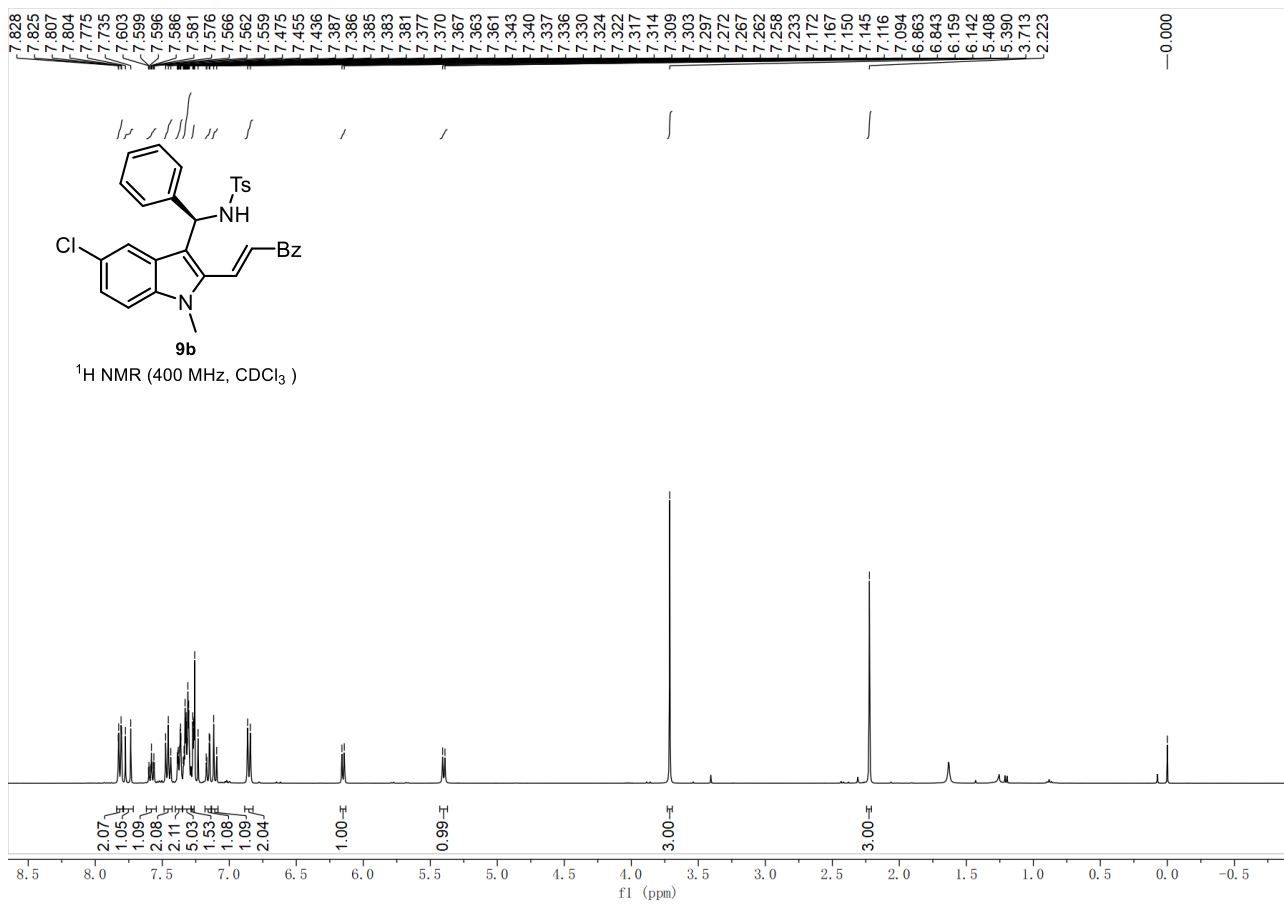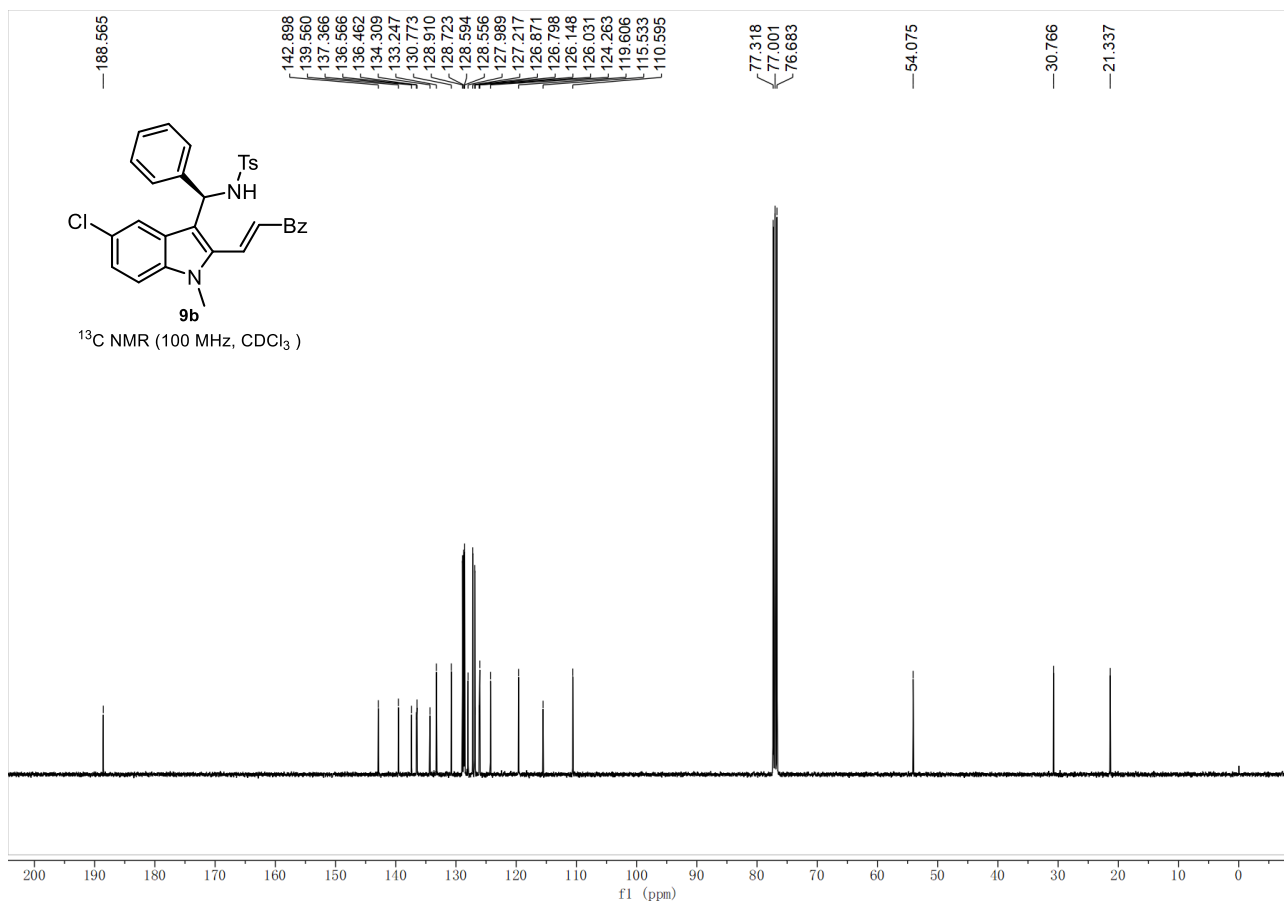

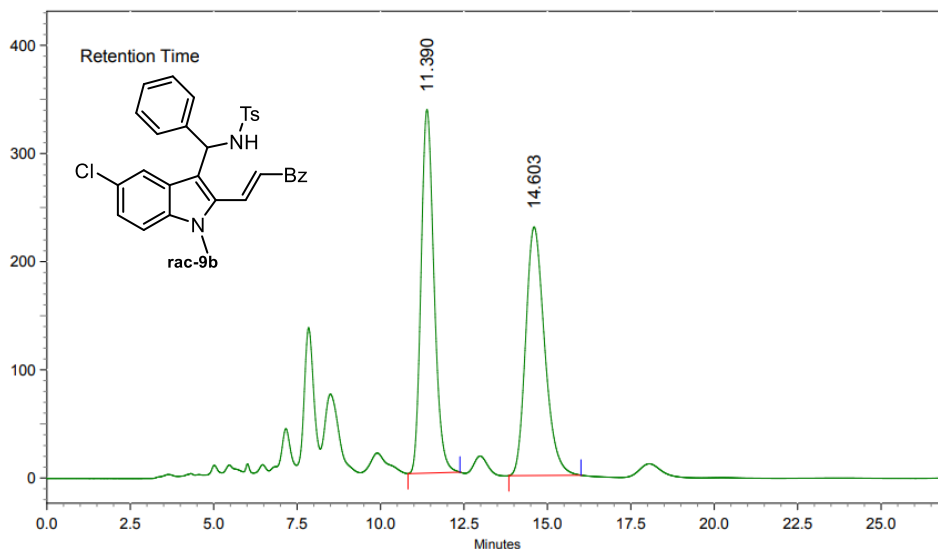

### AREA PERCENT REPORT

| Peak No. | Ret Time | Width | Height  | Area      | Area [%] |
|----------|----------|-------|---------|-----------|----------|
| 1        | 11.390   | 1.557 | 5639066 | 152337813 | 50.0221  |
| 2        | 14.603   | 2.160 | 3856711 | 152202933 | 49.9779  |

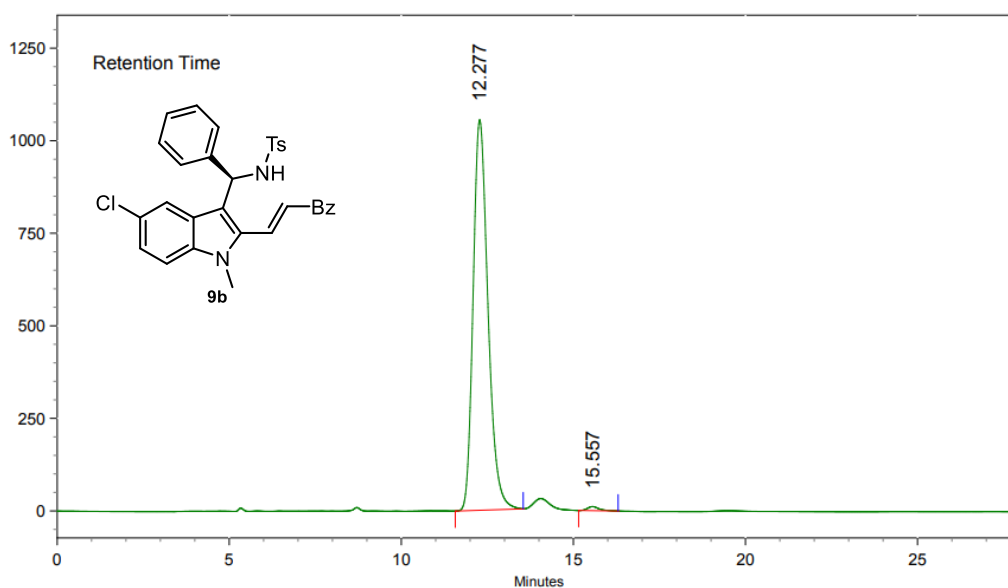

### AREA PERCENT REPORT

| Peak No. | Ret Time | Width | Height   | Area      | Area [%] |
|----------|----------|-------|----------|-----------|----------|
| 1        | 12.277   | 1.973 | 17699235 | 530018258 | 99.1872  |
| 2        | 15.557   | 1.147 | 185379   | 4343132   | 0.8128   |

|                |                   |              |                |            |              |                   |                      |
|----------------|-------------------|--------------|----------------|------------|--------------|-------------------|----------------------|
| Name           | CYC-20211129-46   | Rack Pos.    |                | Instrument | Instrument 1 | Operator          |                      |
| Inj. Vol. (ul) | 8                 | Plate Pos.   |                | IRM Status | Success      | Acq. Time (Local) | 12/1/2021 5:54:58 PM |
| Data File      | CYC-20211129-46.d | Method (Acq) | ZYJ-20201106.m | Comment    |              |                   | (UTC+08:00)          |

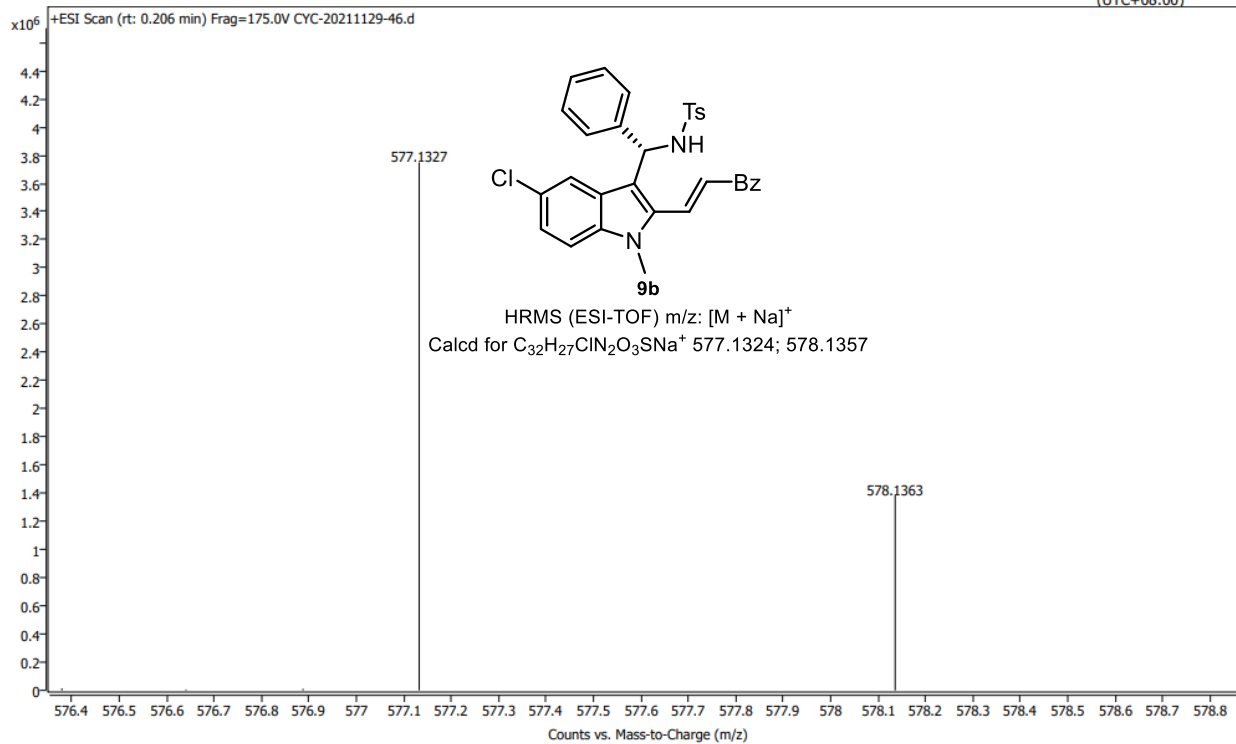

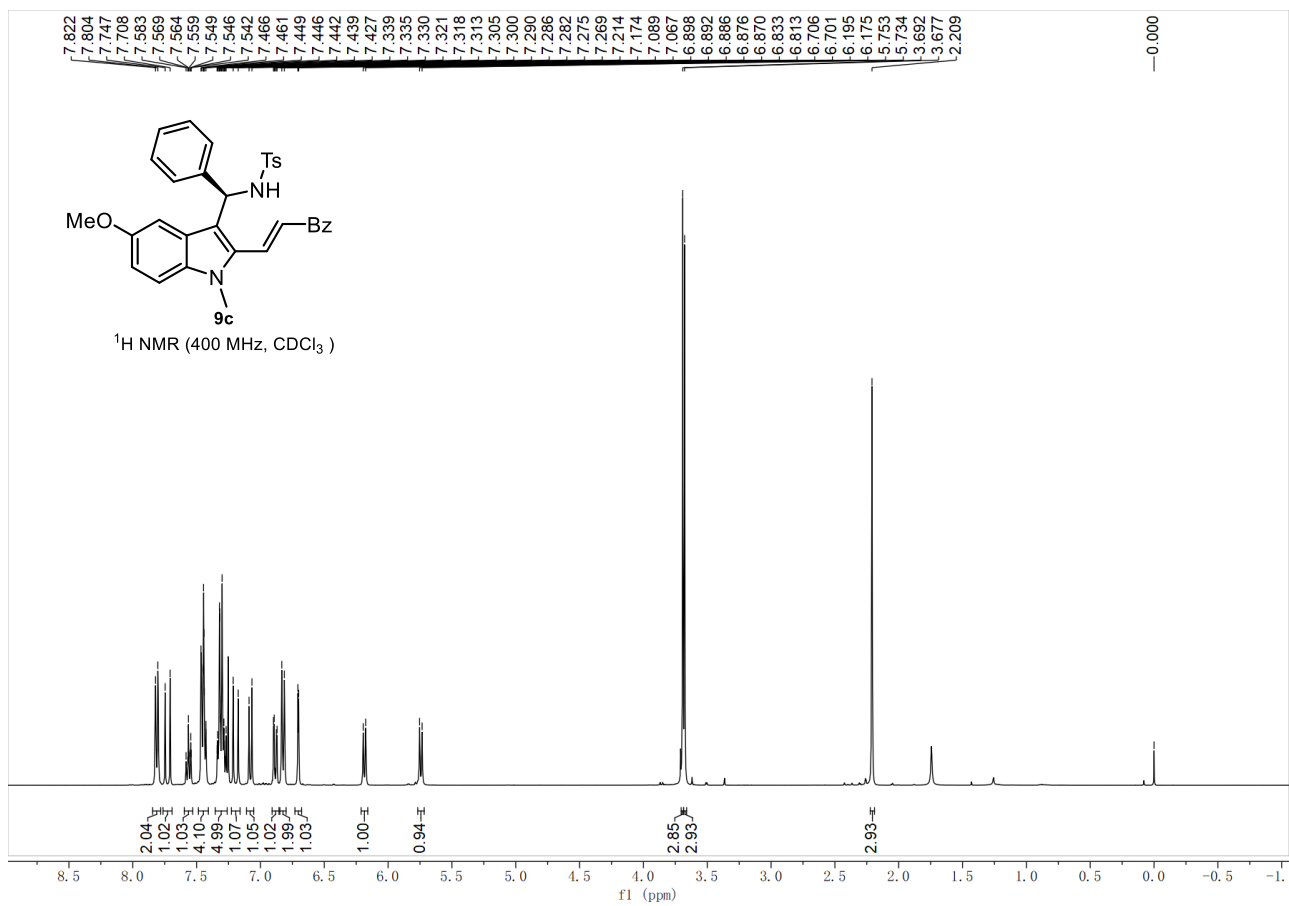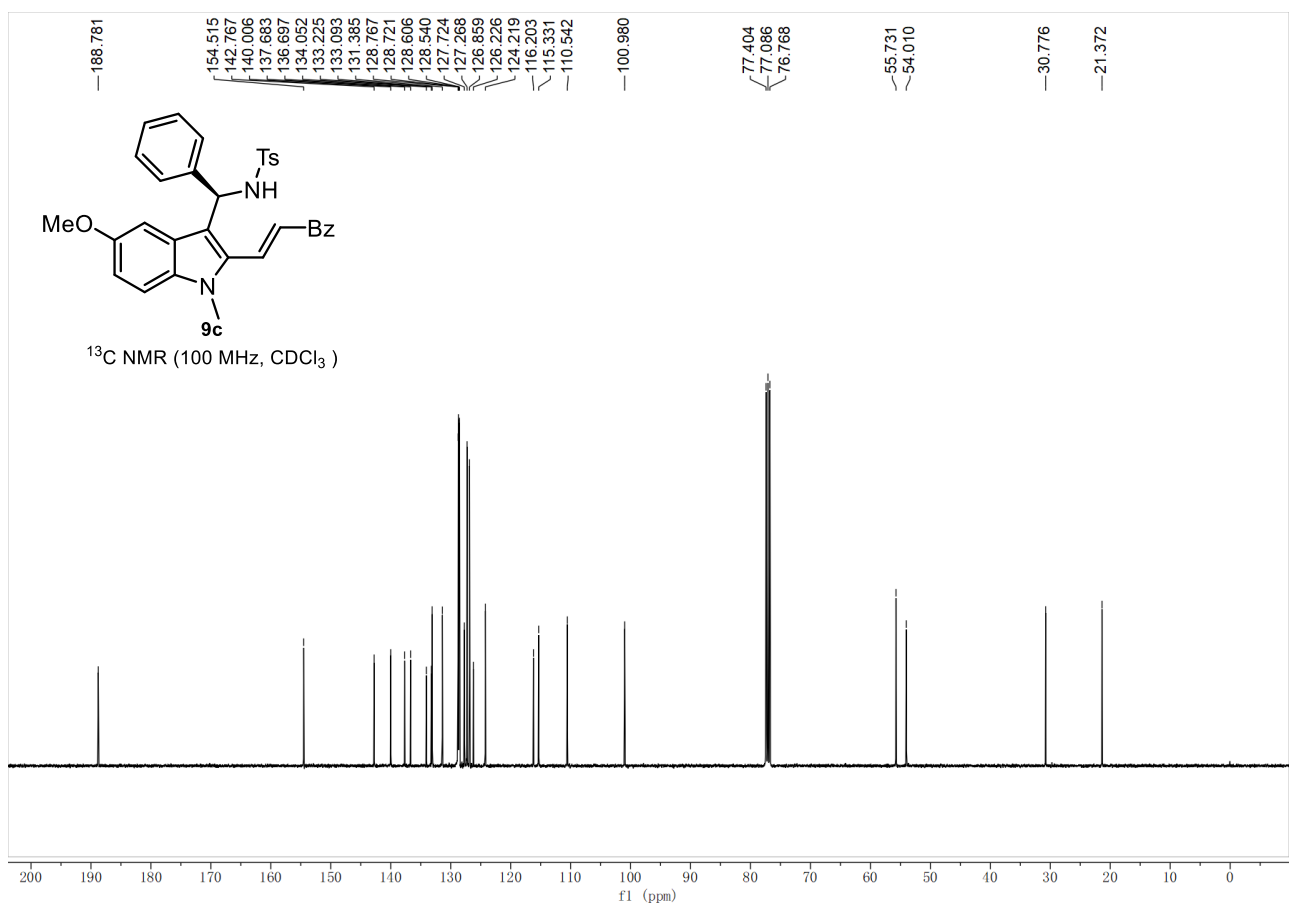

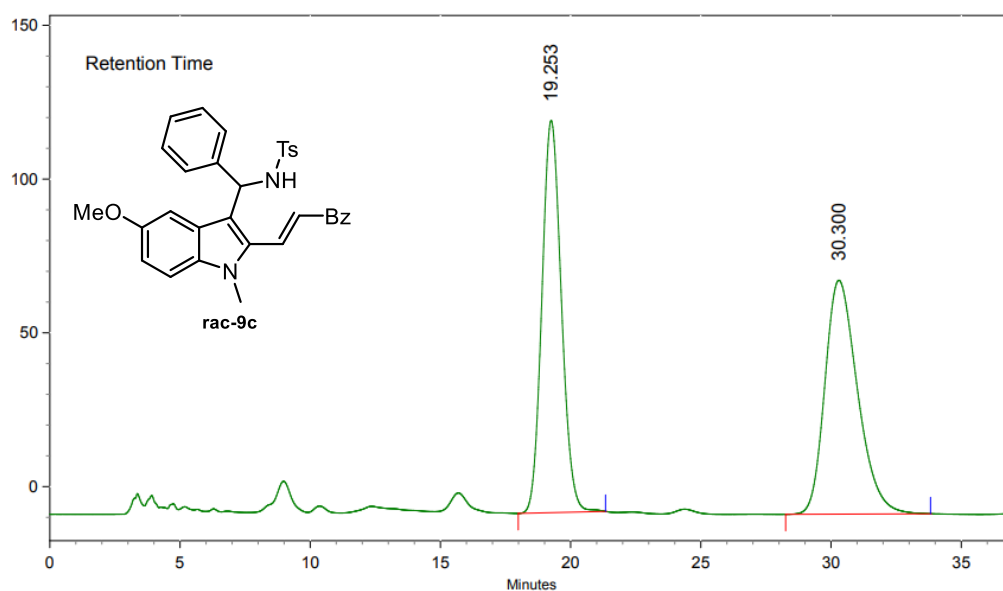

### AREA PERCENT REPORT

| Peak No. | Ret Time | Width | Height  | Area      | Area [%] |
|----------|----------|-------|---------|-----------|----------|
| 1        | 19.253   | 3.350 | 2139544 | 110998462 | 49.9433  |
| 2        | 30.300   | 5.563 | 1276119 | 111250474 | 50.0567  |

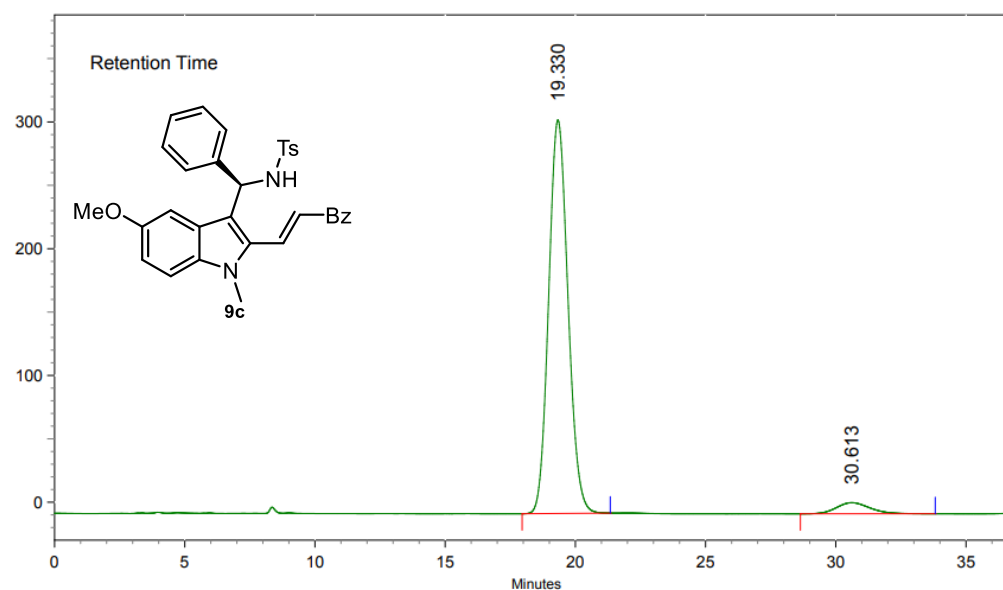

### AREA PERCENT REPORT

| Peak No. | Ret Time | Width | Height  | Area      | Area [%] |
|----------|----------|-------|---------|-----------|----------|
| 1        | 19.330   | 3.383 | 5209470 | 268629475 | 95.3700  |
| 2        | 30.613   | 5.180 | 146489  | 13041364  | 4.6300   |





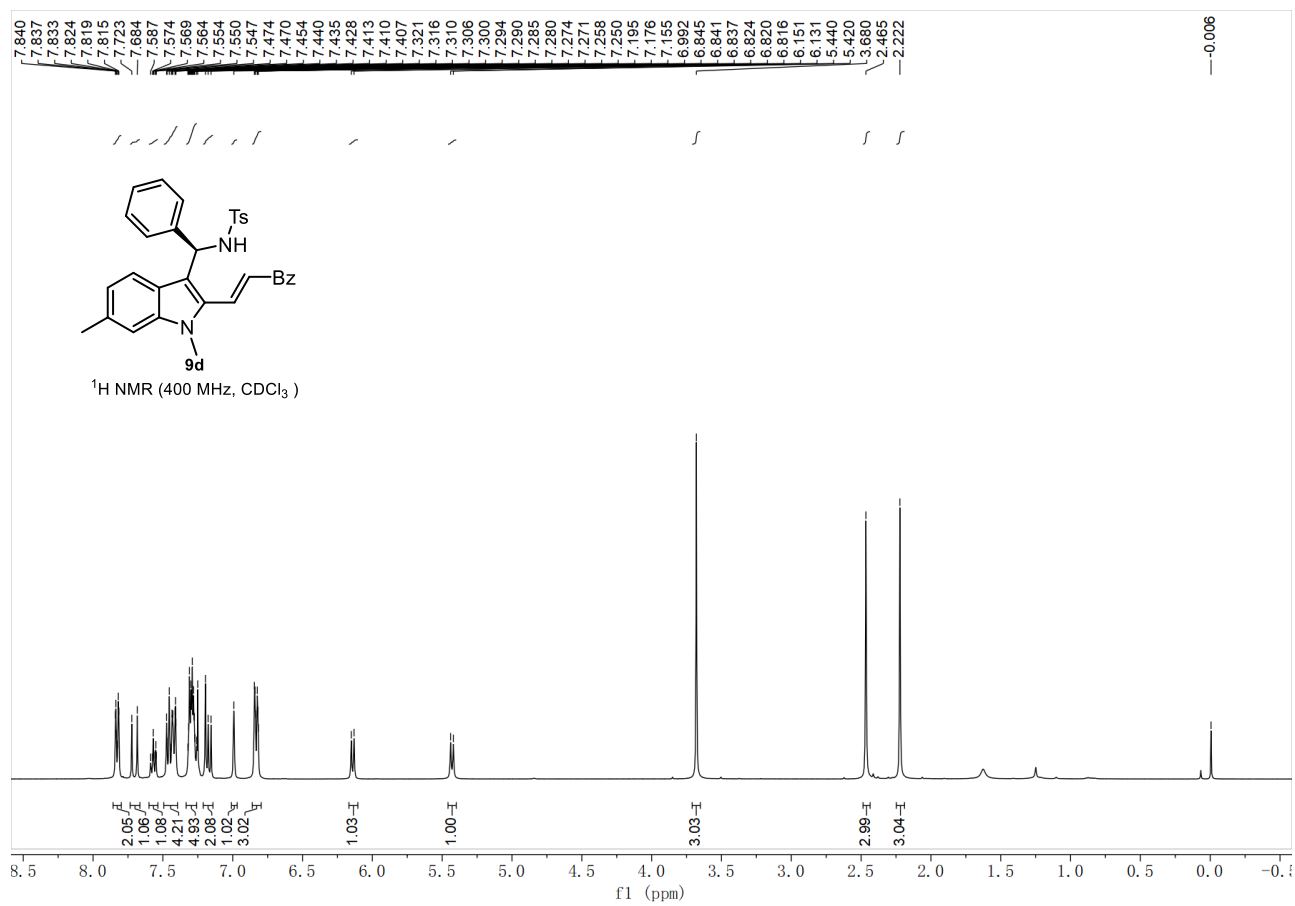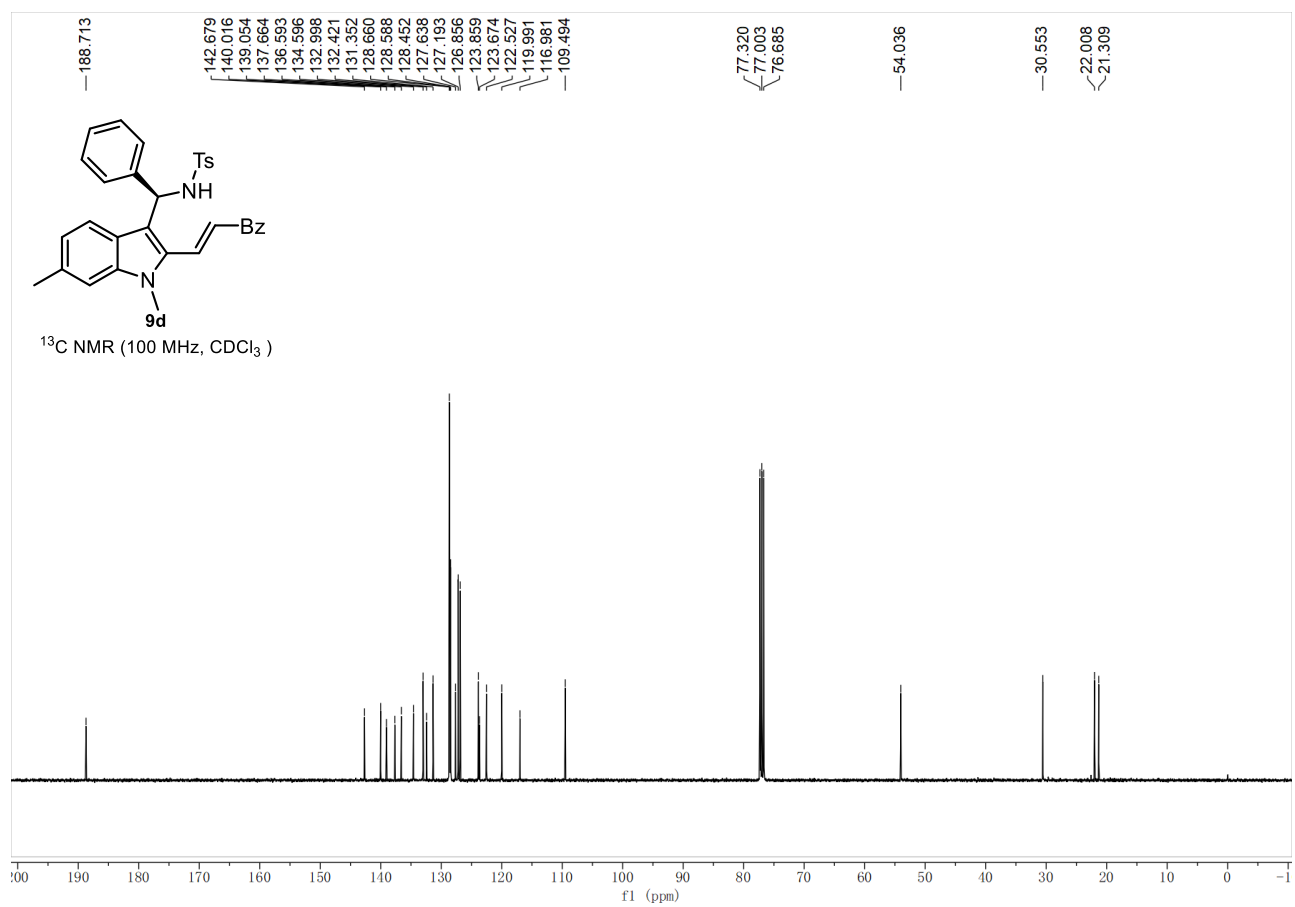

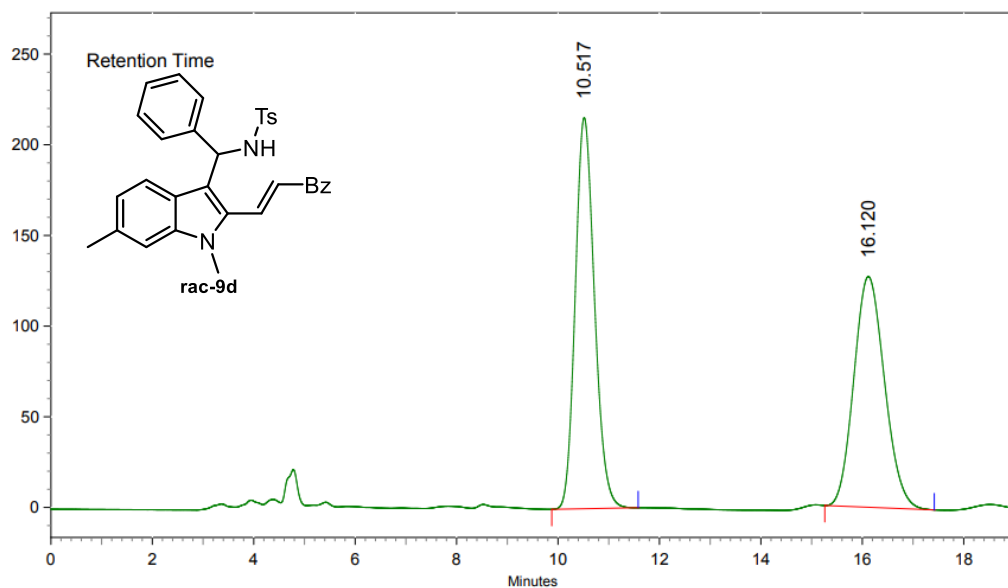

### AREA PERCENT REPORT

| Peak No. | Ret Time | Width | Height  | Area     | Area [%] |
|----------|----------|-------|---------|----------|----------|
| 1        | 10.517   | 1.703 | 3617658 | 95289523 | 51.5117  |
| 2        | 16.120   | 2.160 | 2134571 | 89696755 | 48.4883  |

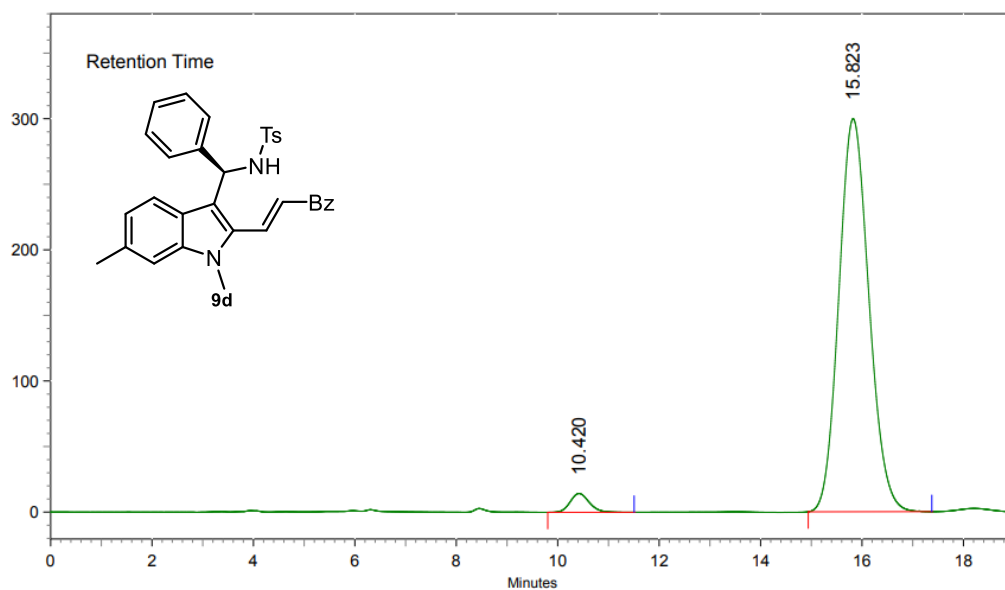

### AREA PERCENT REPORT

| Peak No. | Ret Time | Width | Height  | Area      | Area [%] |
|----------|----------|-------|---------|-----------|----------|
| 1        | 10.420   | 1.703 | 241044  | 6302803   | 2.9518   |
| 2        | 15.823   | 2.437 | 5028017 | 207223010 | 97.0482  |

|                |                   |              |                |            |              |                                                       |
|----------------|-------------------|--------------|----------------|------------|--------------|-------------------------------------------------------|
| Name           | CYC-20211129-48   | Rack Pos.    |                | Instrument | Instrument 1 | Operator                                              |
| Inj. Vol. (ul) | 8                 | Plate Pos.   |                | IRM Status | Success      |                                                       |
| Data File      | CYC-20211129-48.d | Method (Acq) | ZYJ-20201106.m | Comment    |              | Acq. Time (Local) 12/1/2021 6:00:52 PM<br>(UTC+08:00) |

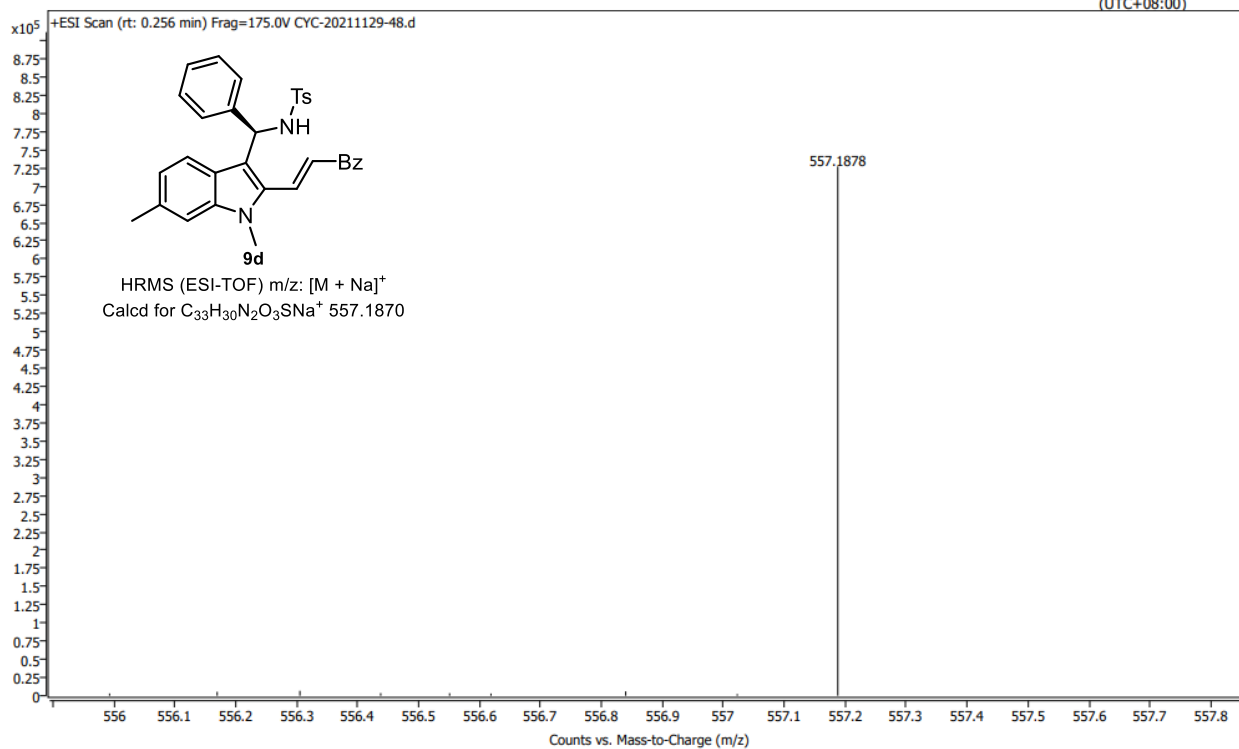

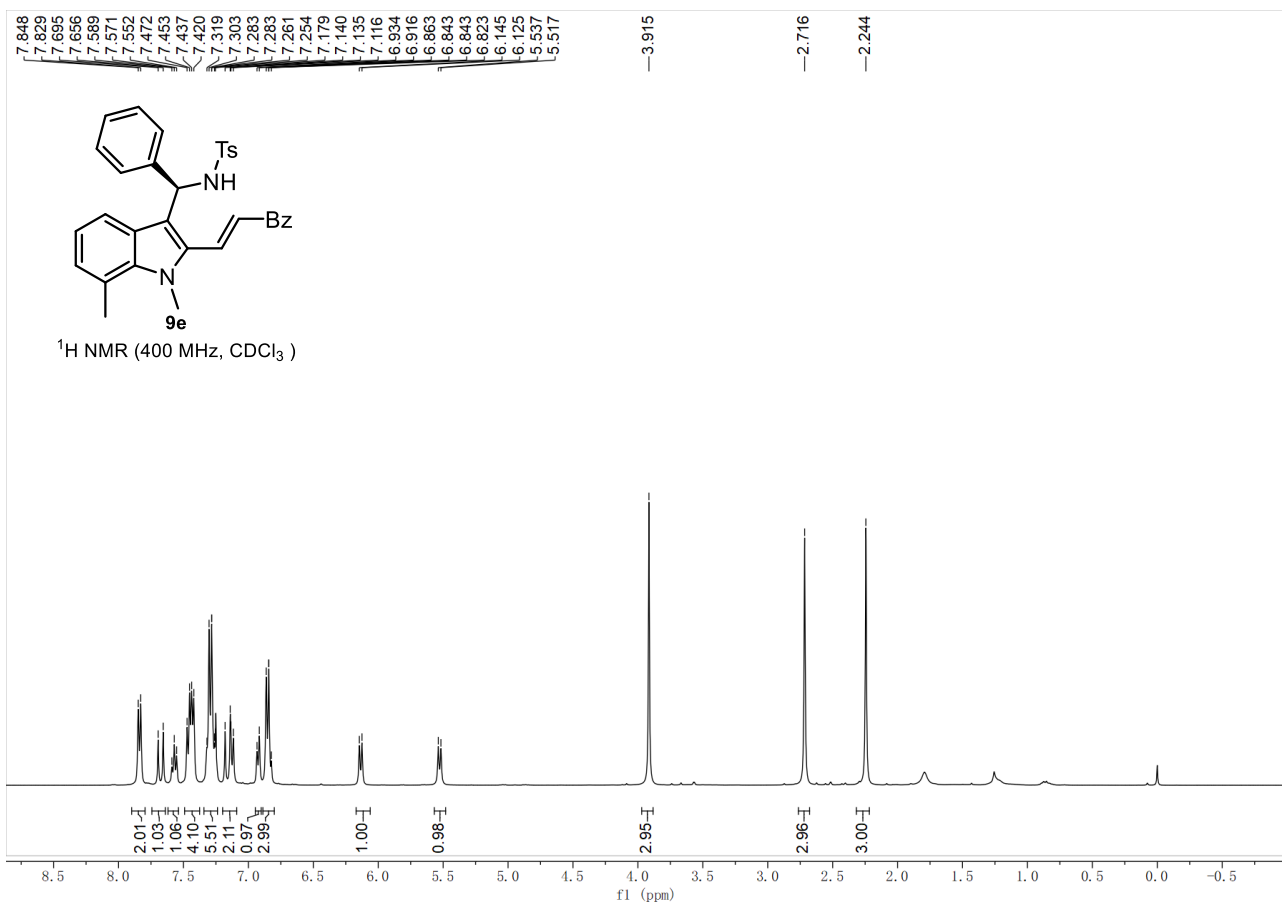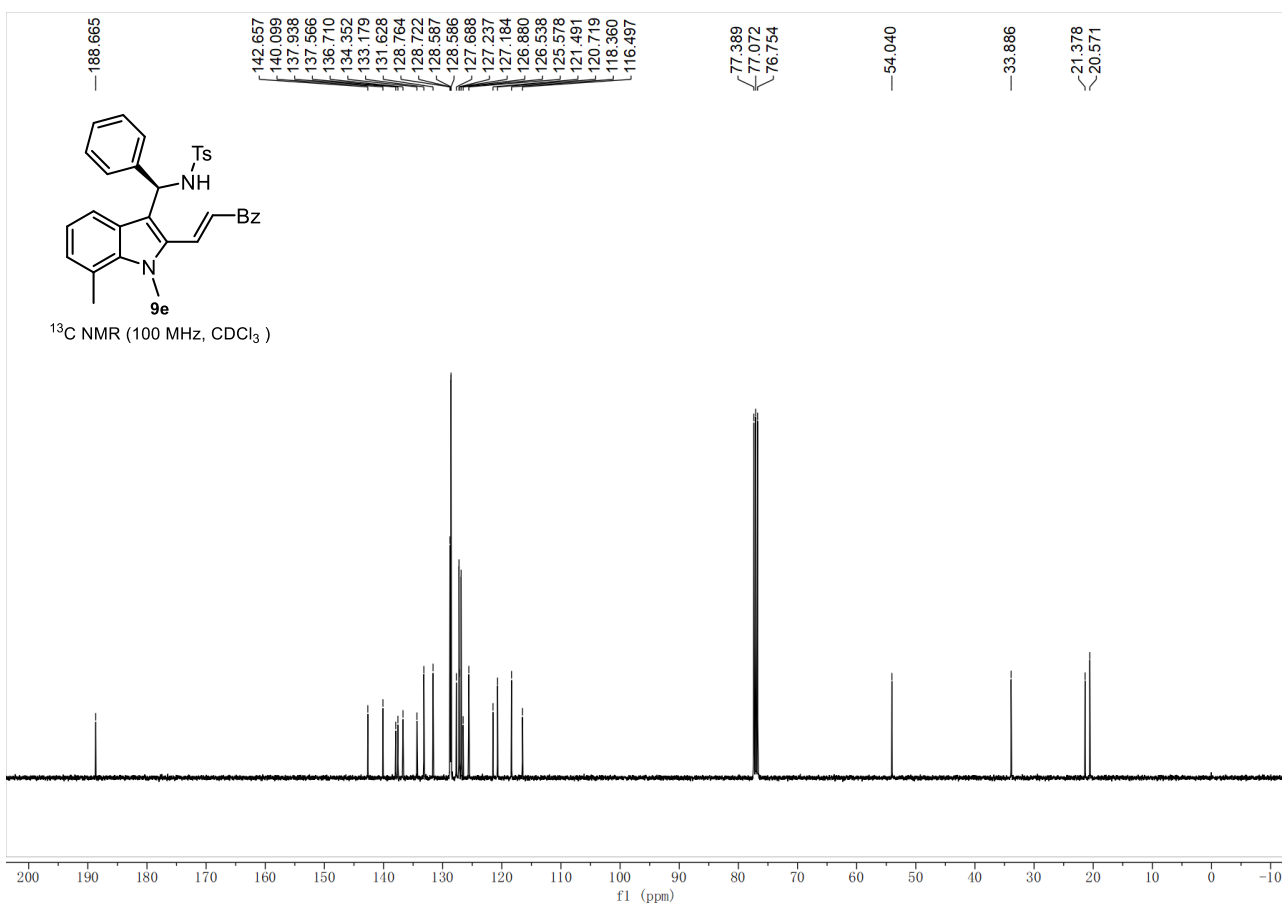

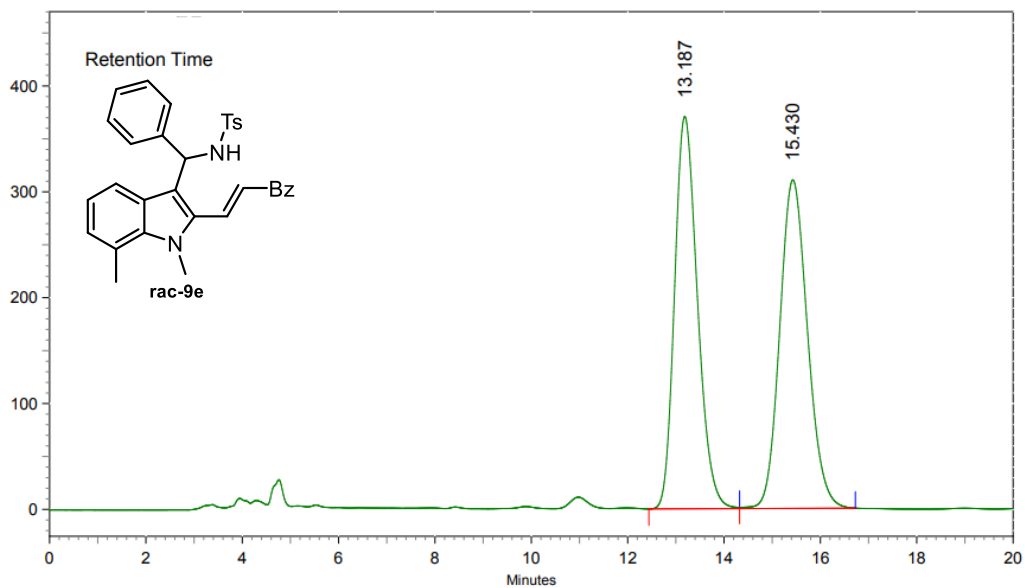

### AREA PERCENT REPORT

| Peak No. | Ret Time | Width | Height  | Area      | Area [%] |
|----------|----------|-------|---------|-----------|----------|
| 1        | 13.187   | 1.883 | 6217001 | 205089247 | 49.5989  |
| 2        | 15.430   | 2.403 | 5206164 | 208405889 | 50.4011  |

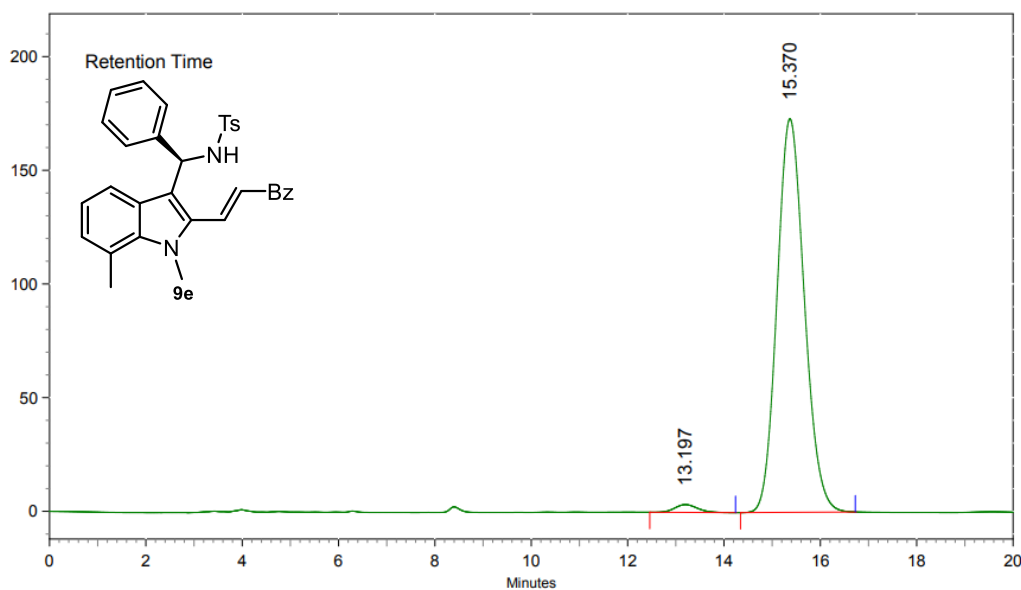

### AREA PERCENT REPORT

| Peak No. | Ret Time | Width | Height  | Area      | Area [%] |
|----------|----------|-------|---------|-----------|----------|
| 1        | 13.197   | 1.780 | 57651   | 1878293   | 1.6145   |
| 2        | 15.370   | 2.383 | 2904245 | 114463831 | 98.3855  |

Name  
Inj. Vol. (ul)  
Data File

CYC-20211129-49  
8  
CYC-20211129-49.d

Rack Pos.  
Plate Pos.  
Method (Acq)

ZYJ-20201106.m

Instrument  
IRM Status  
Comment

Instrument 1  
Success

Operator

Acq. Time (Local)

12/1/2021 6:03:49 PM  
(UTC+08:00)

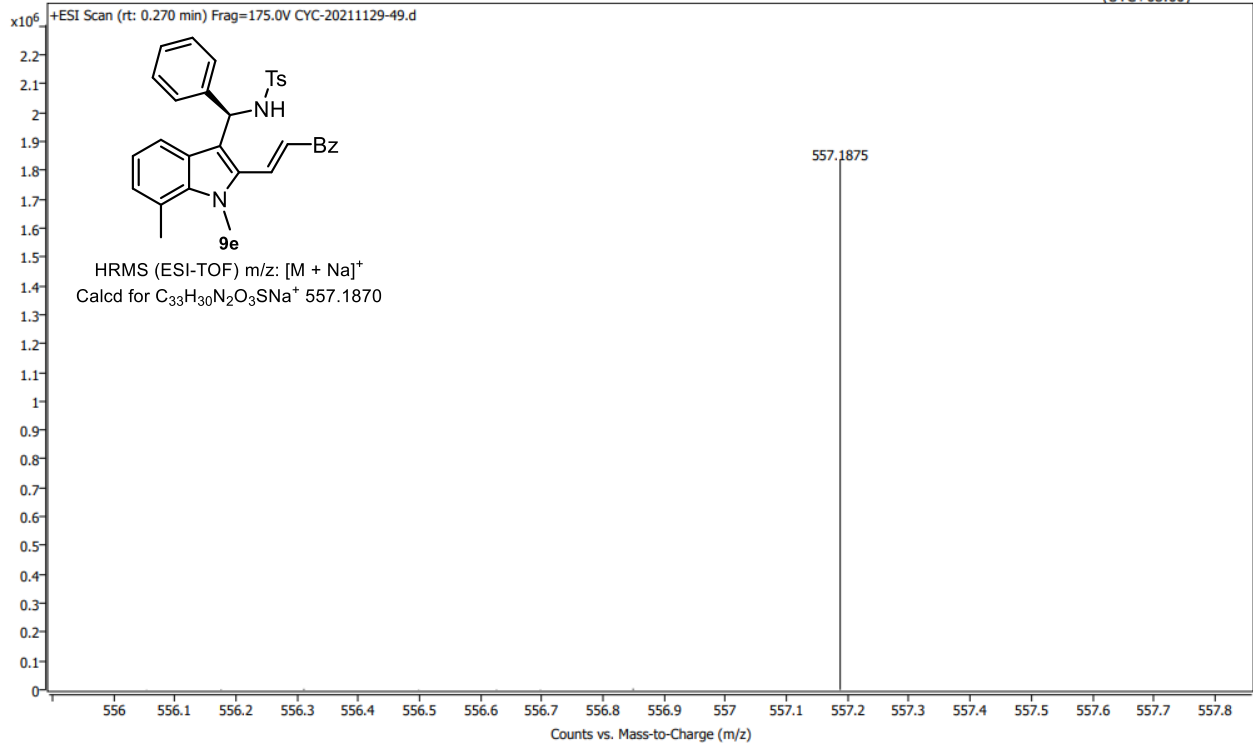

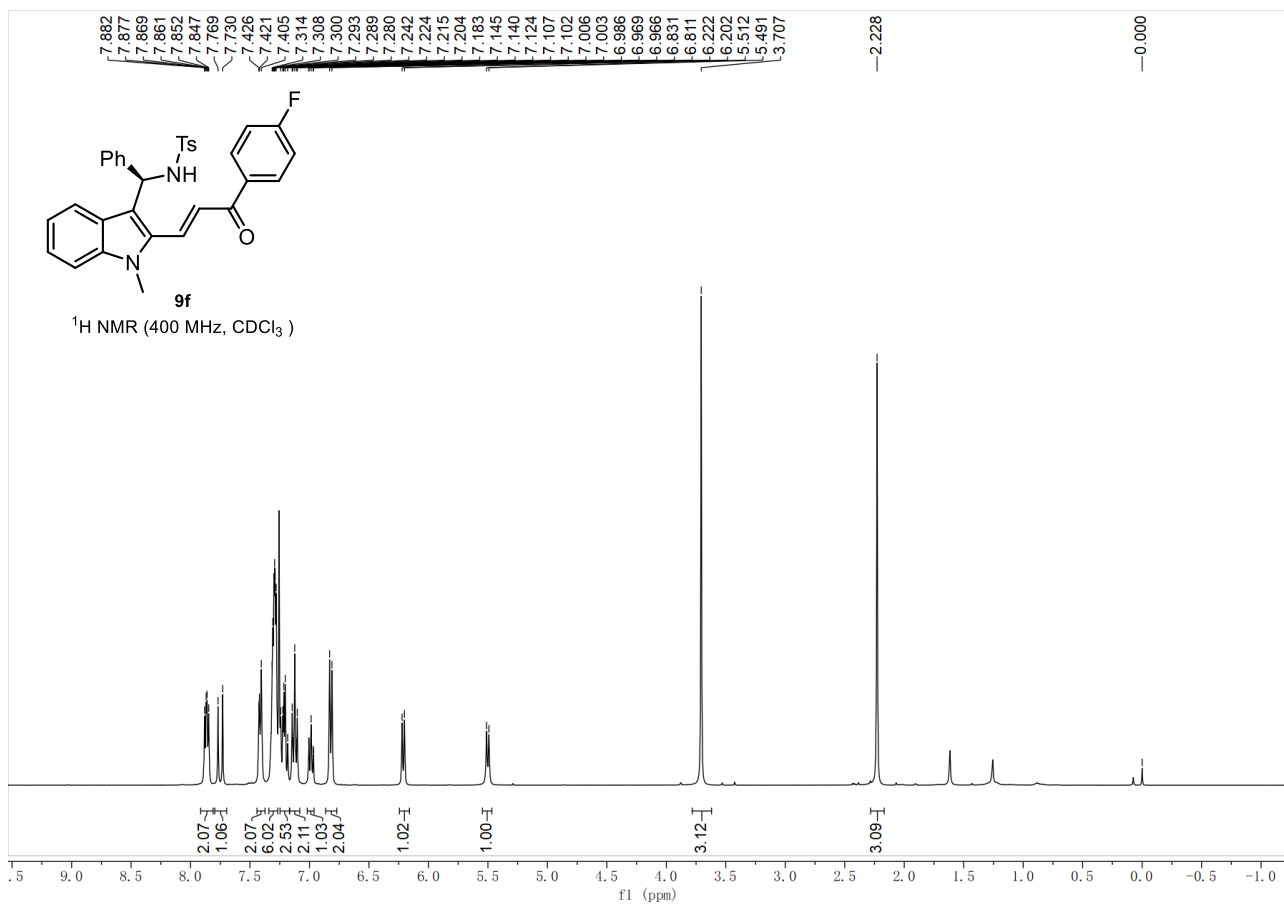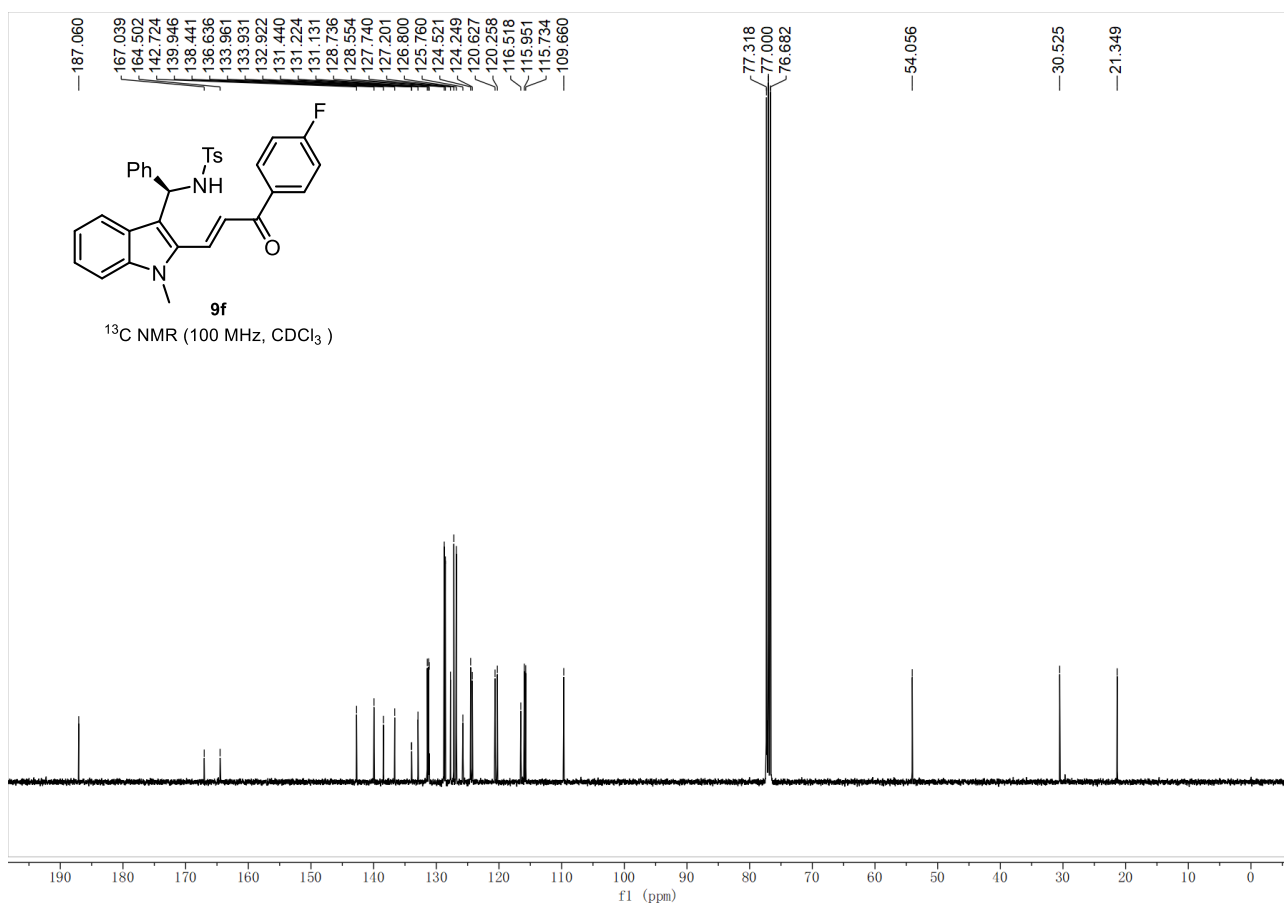



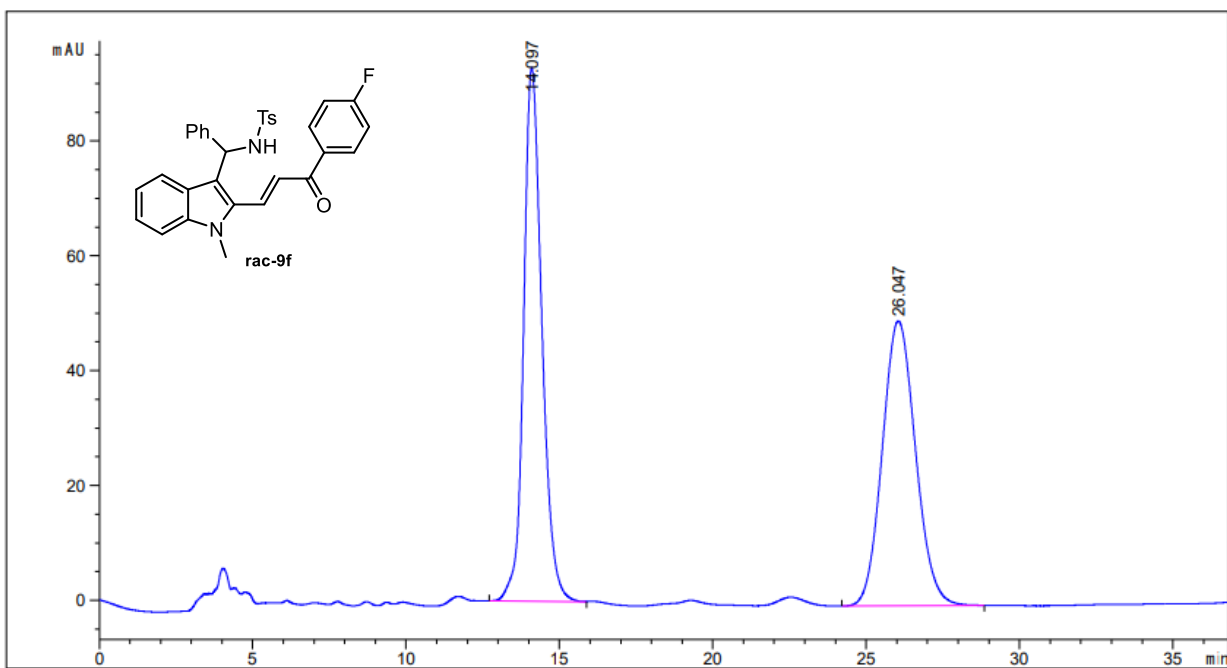

| # | [min]  | [min] | [mAU*s] | [mAU]      | %        |         |
|---|--------|-------|---------|------------|----------|---------|
| 1 | 14.097 | BB    | 0.6307  | 3837.86670 | 92.86835 | 50.6715 |
| 2 | 26.047 | BB    | 1.1595  | 3736.15186 | 49.61930 | 49.3285 |

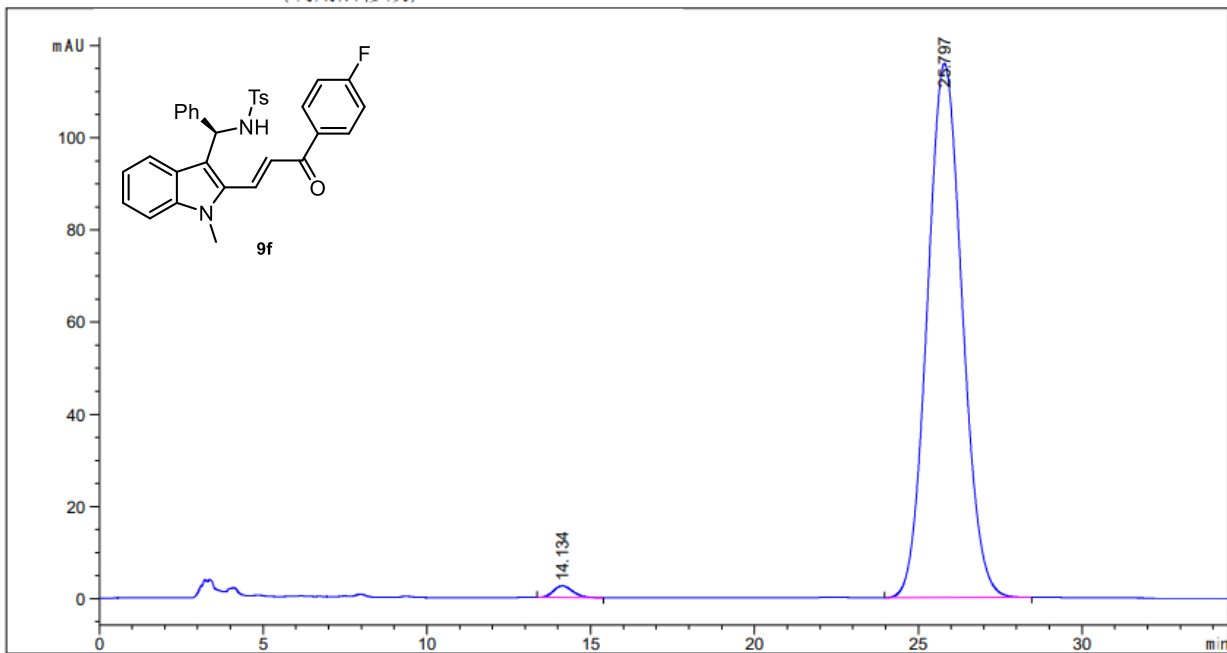

| # | [min]  | [min] | [mAU*s] | [mAU]      | %         |         |
|---|--------|-------|---------|------------|-----------|---------|
| 1 | 14.134 | BB    | 0.5884  | 103.50513  | 2.53538   | 1.1951  |
| 2 | 25.797 | BB    | 1.1544  | 8557.31055 | 115.85522 | 98.8049 |

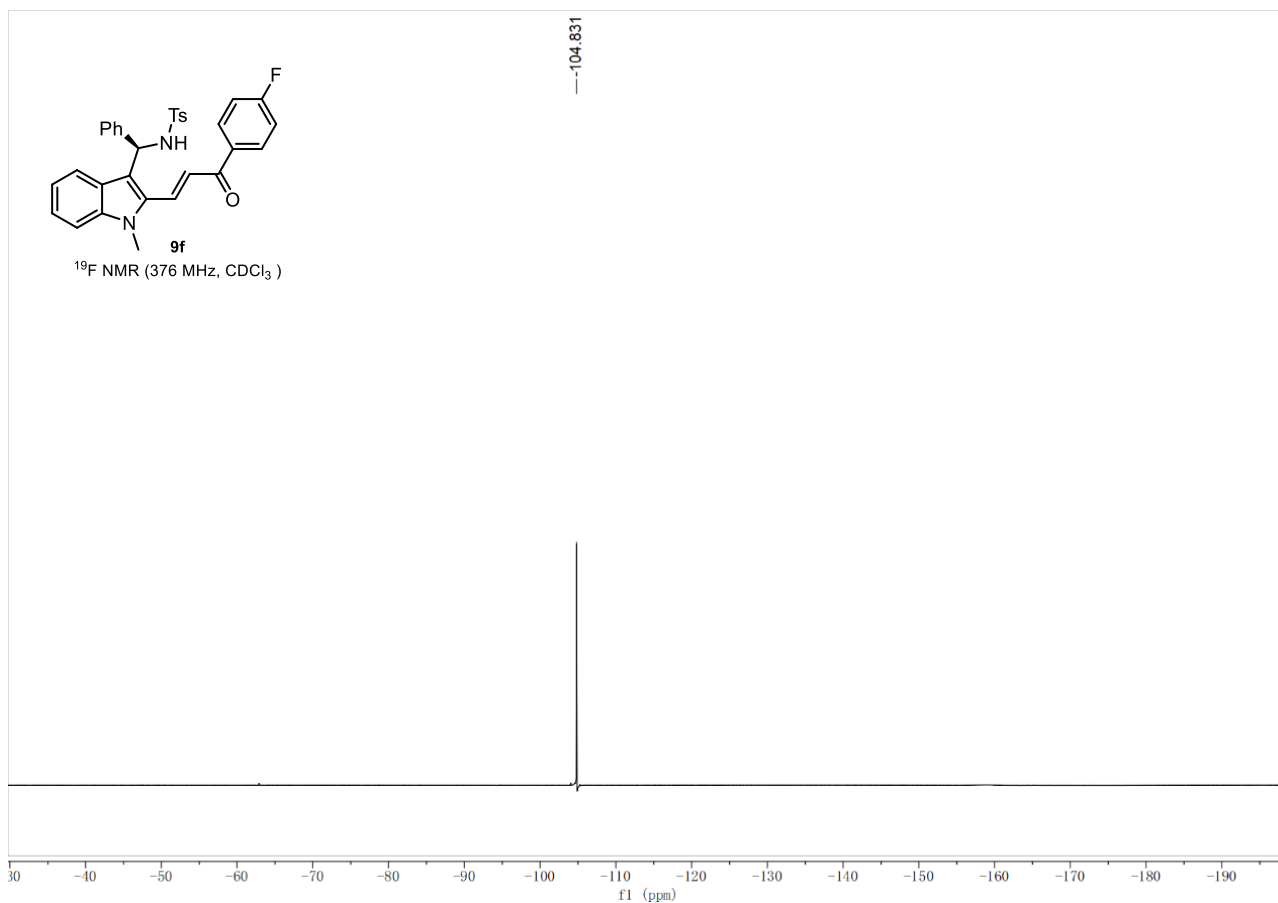

| Name           | CYC-20211129-42   | Rack Pos.    | Instrument     | Instrument 1 | Operator                                           |
|----------------|-------------------|--------------|----------------|--------------|----------------------------------------------------|
| Inj. Vol. (ul) | 8                 | Plate Pos.   | IRM Status     | Success      |                                                    |
| Data File      | CYC-20211129-42.d | Method (Acq) | ZYJ-20201106.m | Comment      | Acq. Time (Local) 12/1/2021 5:43:11 PM (UTC+08:00) |

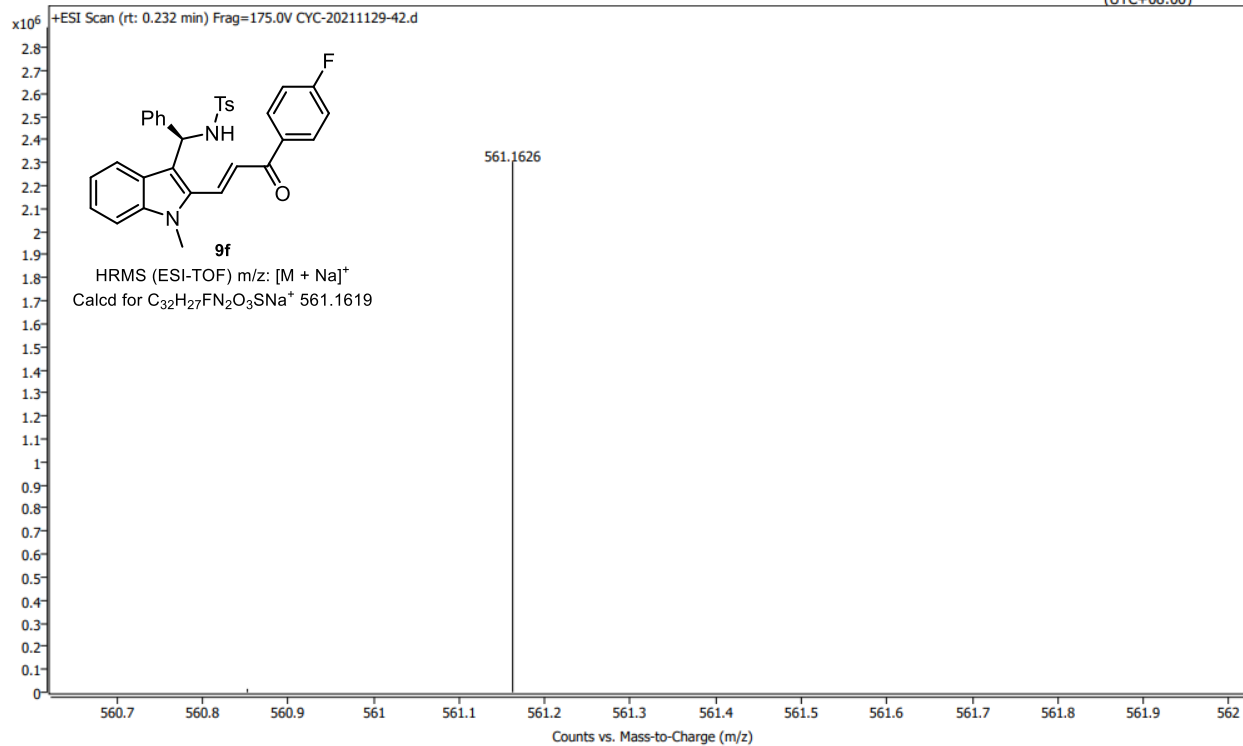

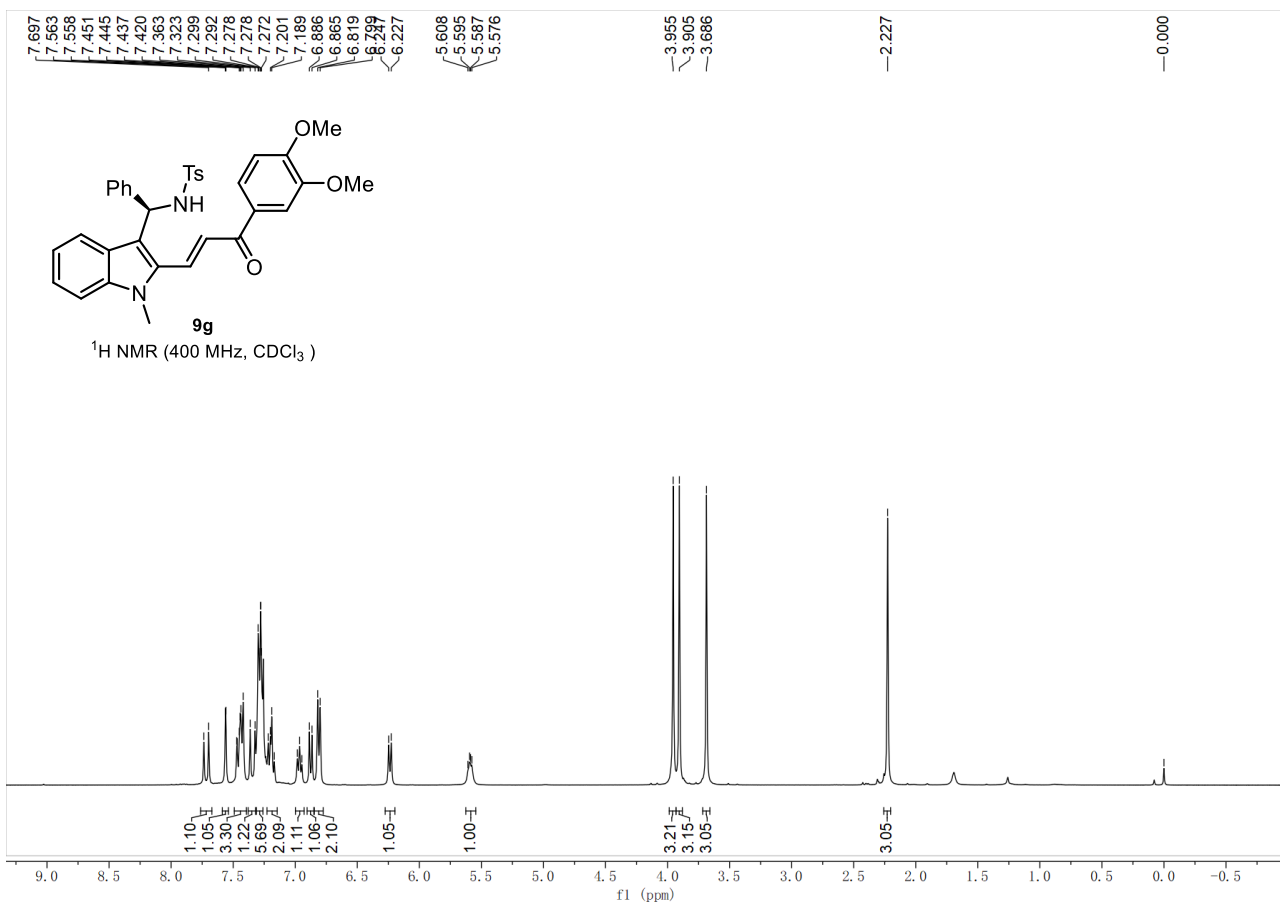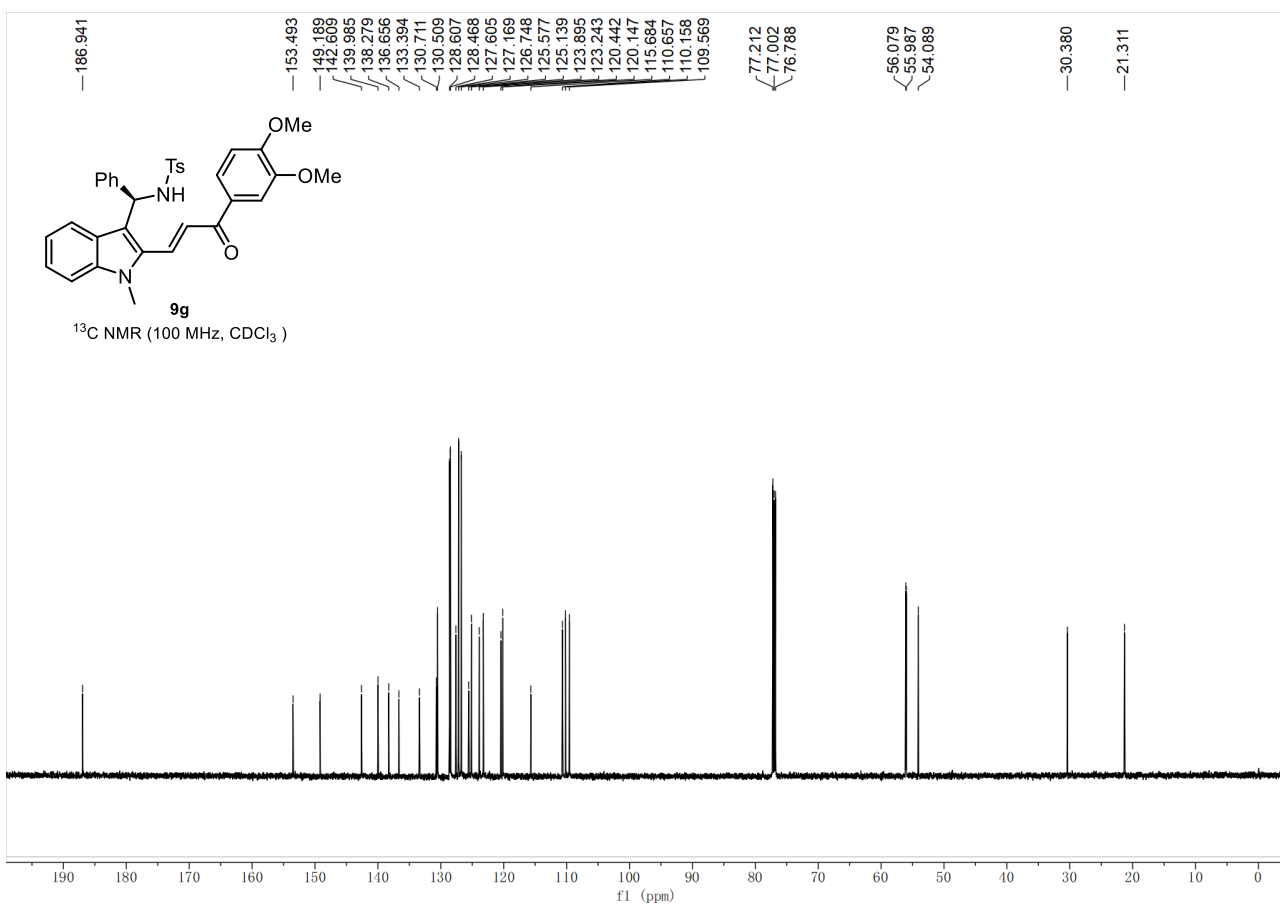

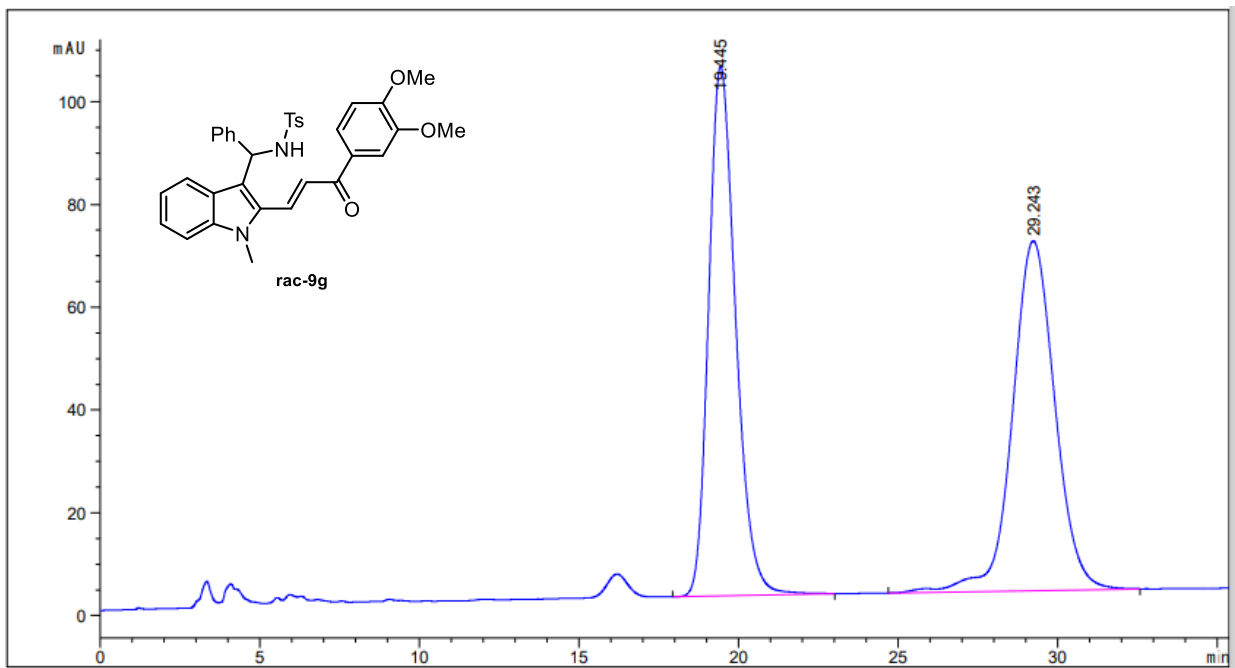

| # | [min]     | [min]  | [mAU*s]    | [mAU]     | %       |
|---|-----------|--------|------------|-----------|---------|
| 1 | 19.445 BB | 0.9056 | 6057.05322 | 103.04829 | 48.9834 |
| 2 | 29.243 BB | 1.4177 | 6308.47754 | 68.06034  | 51.0166 |

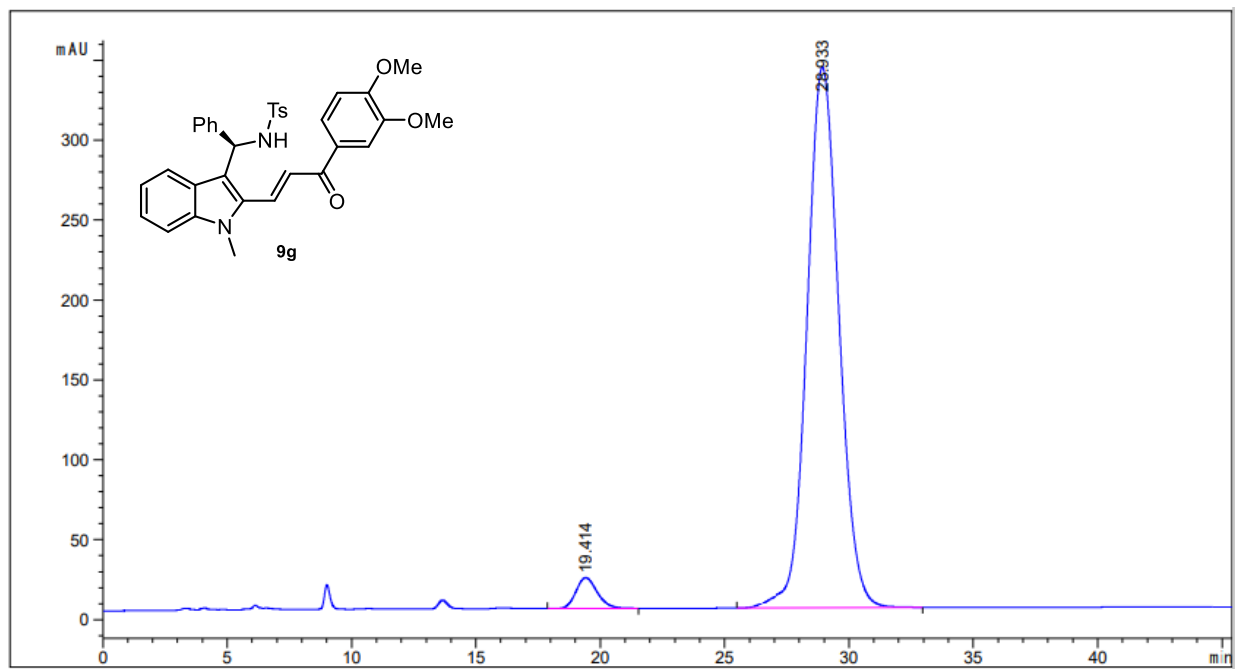

| # | [min]     | [min]  | [mAU*s]    | [mAU]     | %       |
|---|-----------|--------|------------|-----------|---------|
| 1 | 19.414 BB | 0.8950 | 1140.88245 | 19.25821  | 3.6408  |
| 2 | 28.933 BB | 1.3824 | 3.01951e4  | 338.17093 | 96.3592 |

Name: CYC-20211129-41 Rack Pos.: Plate Pos.: Instrument: Instrument 1: Operator:  
Inj. Vol. (ul): 8 Method (Acq): ZYJ-20201106.m IRM Status: Comment: Success: Acq. Time (Local): 12/1/2021 5:39:58 PM  
Data File: CYC-20211129-41.d

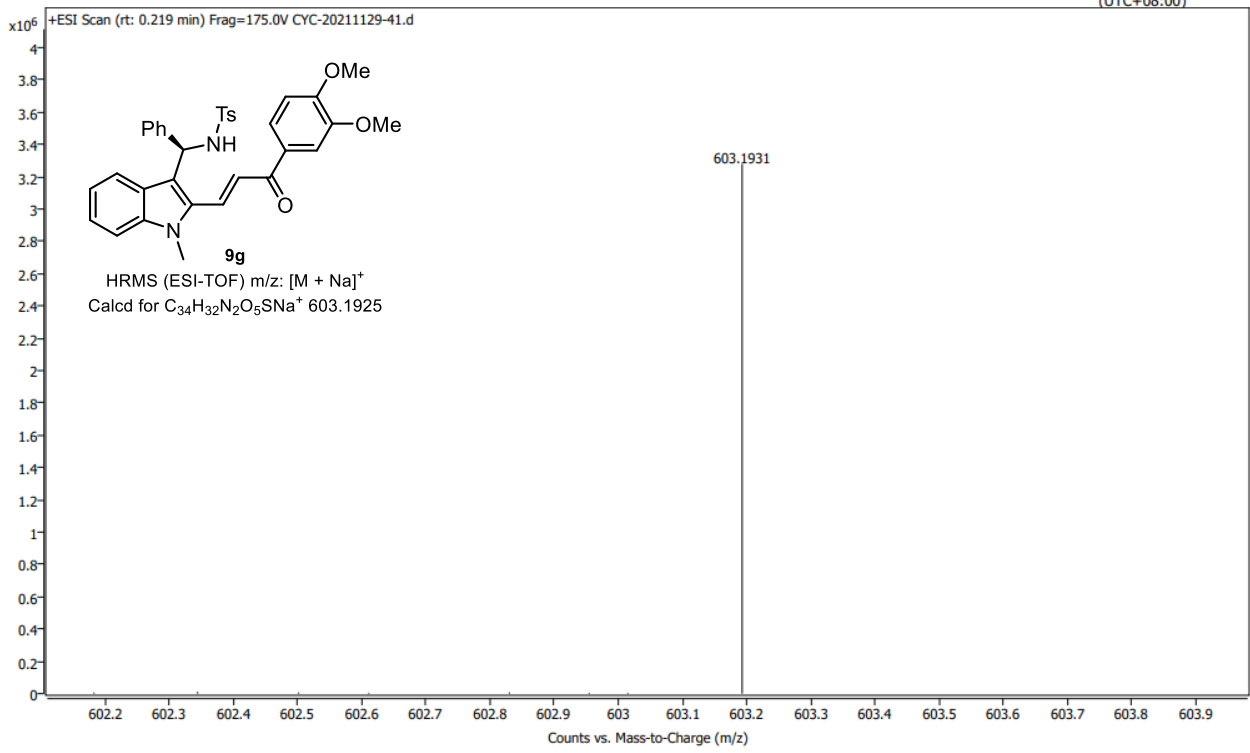

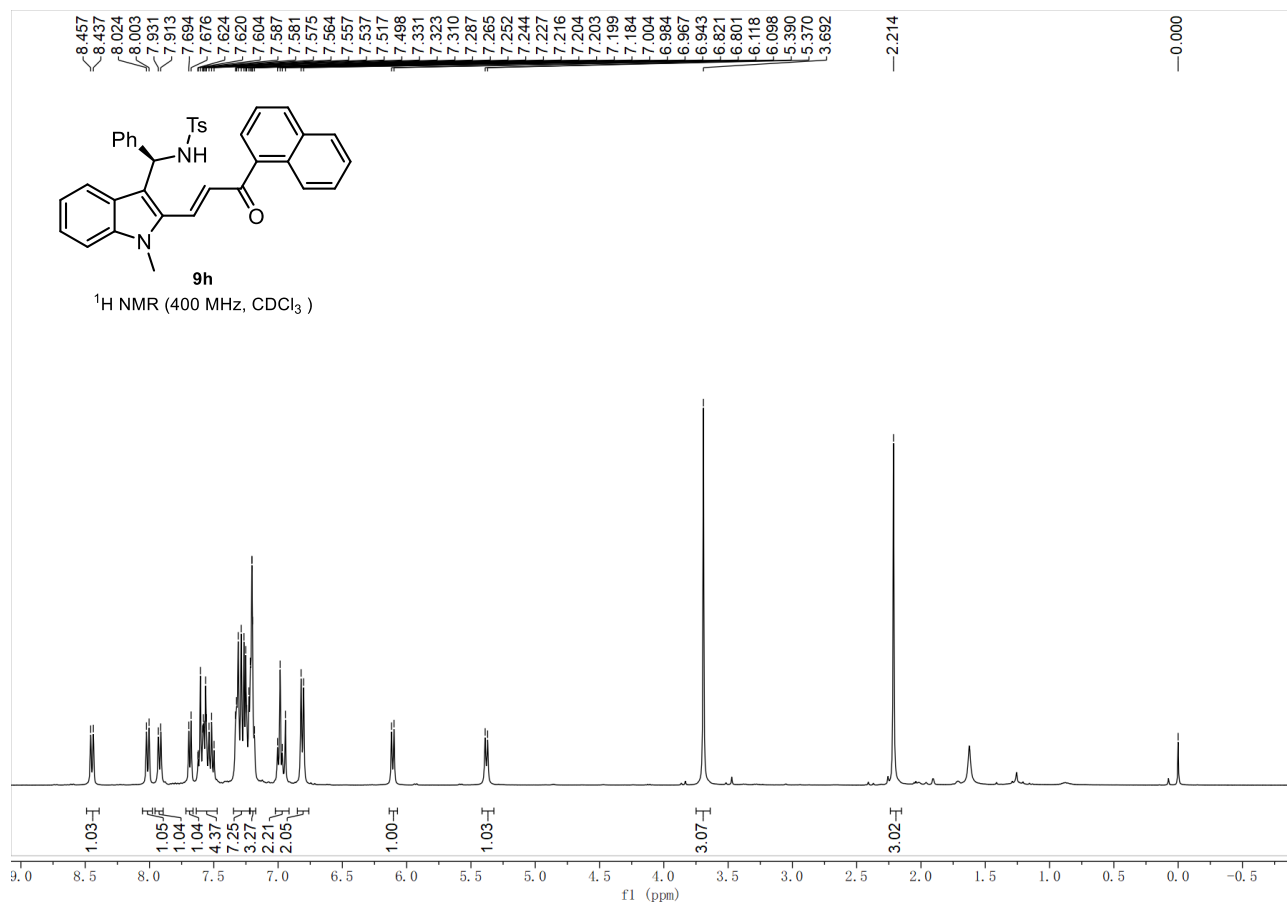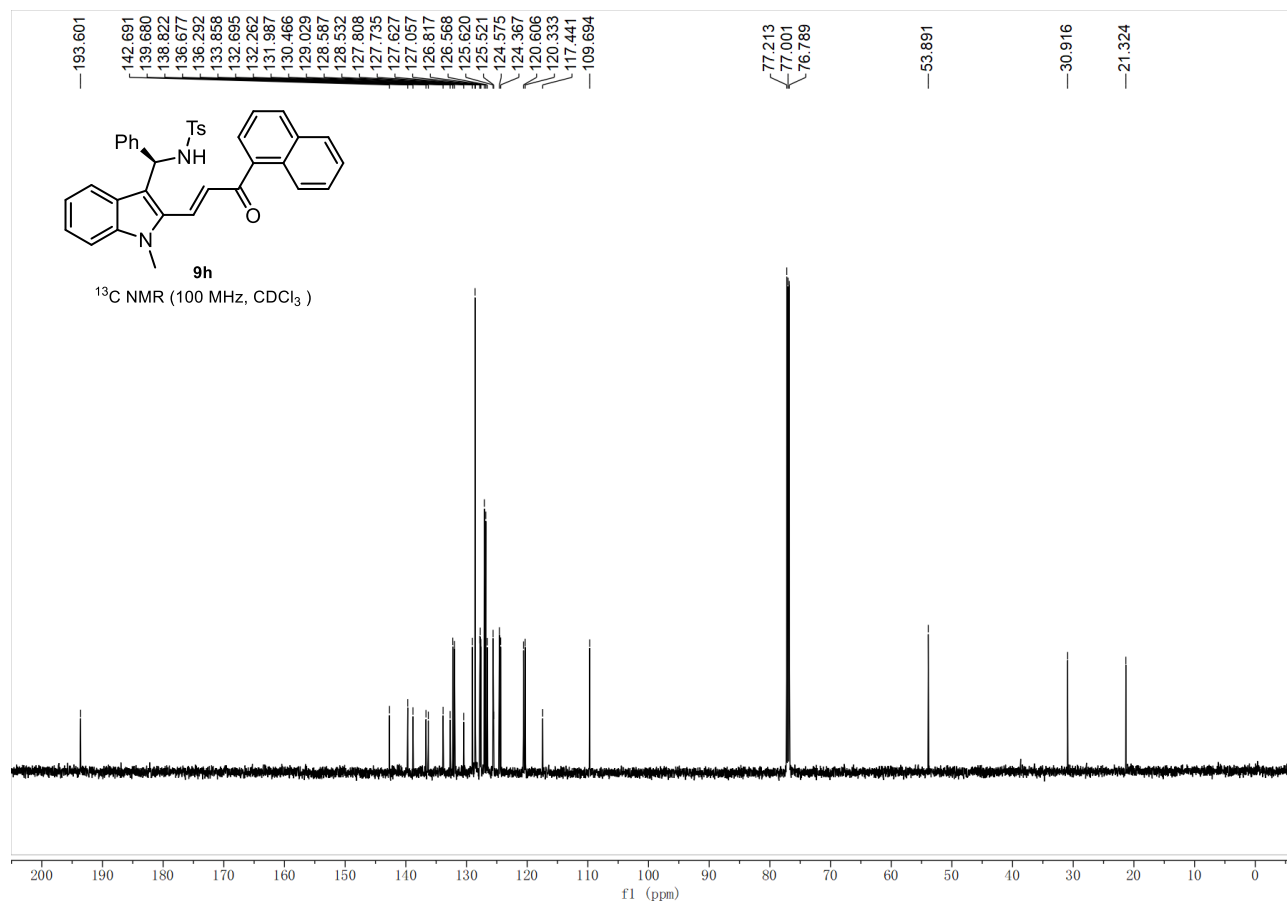

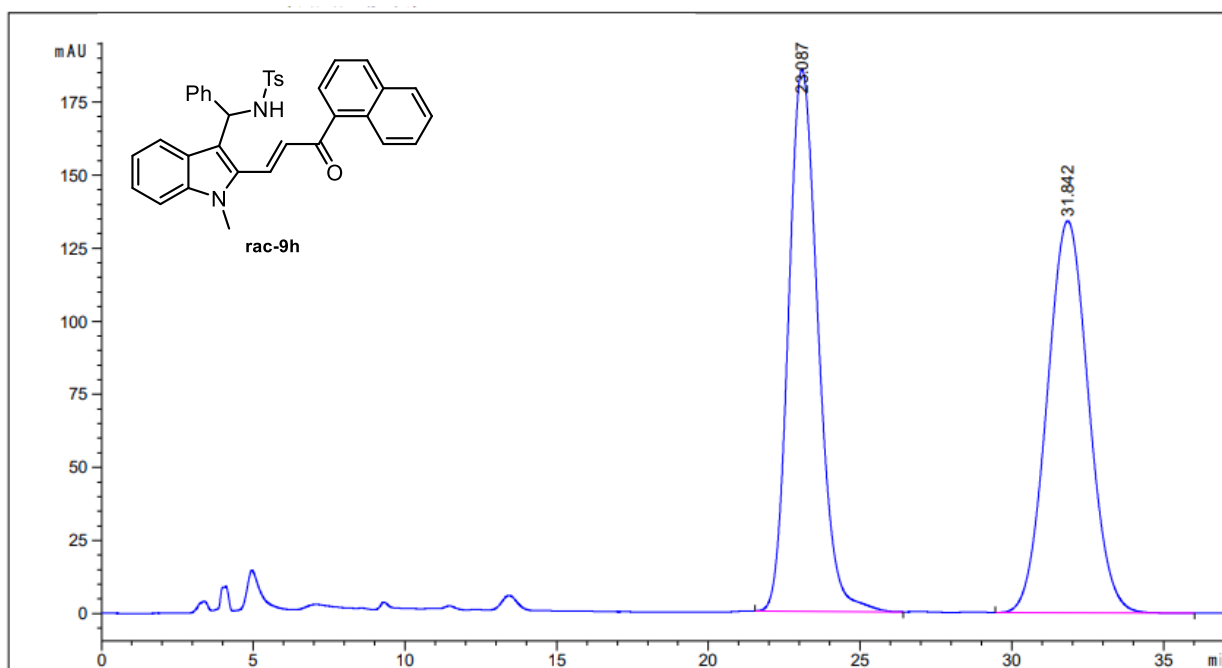

| # | [min]  | [min] | [mAU*s] | [mAU]     | %         |         |
|---|--------|-------|---------|-----------|-----------|---------|
| 1 | 23.087 | BB    | 1.0482  | 1.25178e4 | 185.43149 | 49.6461 |
| 2 | 31.842 | BB    | 1.4730  | 1.26963e4 | 134.09778 | 50.3539 |

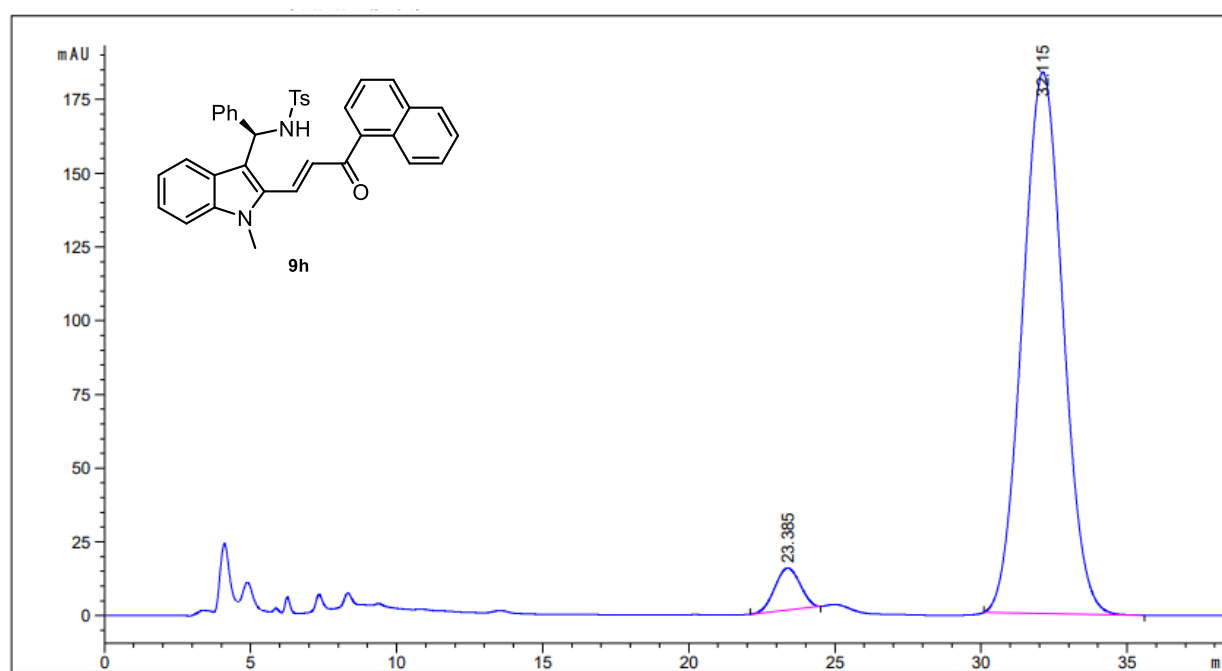

| # | [min]  | [min] | [mAU*s] | [mAU]     | %         |         |
|---|--------|-------|---------|-----------|-----------|---------|
| 1 | 23.385 | BB    | 0.9409  | 858.65027 | 14.23808  | 4.6249  |
| 2 | 32.115 | BB    | 1.4287  | 1.77073e4 | 183.49400 | 95.3751 |

|                |                   |              |                |            |              |                                                       |
|----------------|-------------------|--------------|----------------|------------|--------------|-------------------------------------------------------|
| Name           | CYC-20211129-43   | Rack Pos.    |                | Instrument | Instrument 1 | Operator                                              |
| Inj. Vol. (ul) | 8                 | Plate Pos.   |                | IRM Status | Success      |                                                       |
| Data File      | CYC-20211129-43.d | Method (Acq) | ZYJ-20201106.m | Comment    |              | Acq. Time (Local) 12/1/2021 5:46:08 PM<br>(UTC+08:00) |

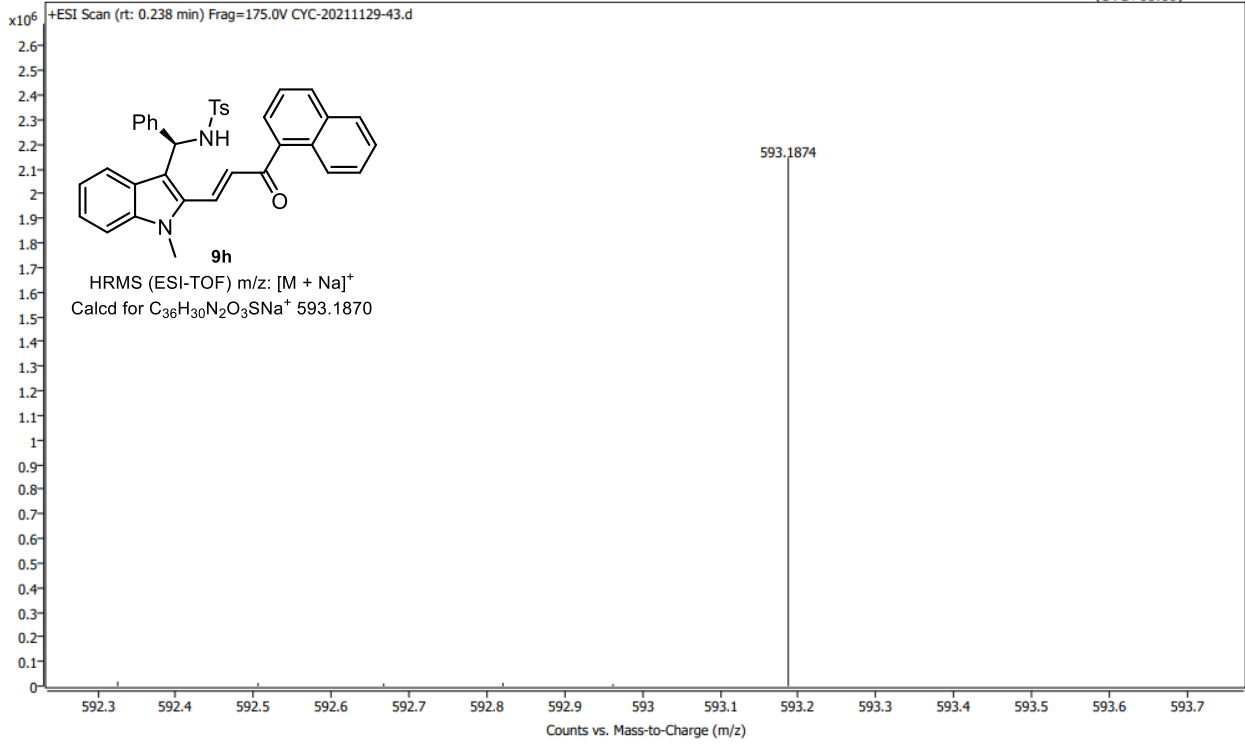



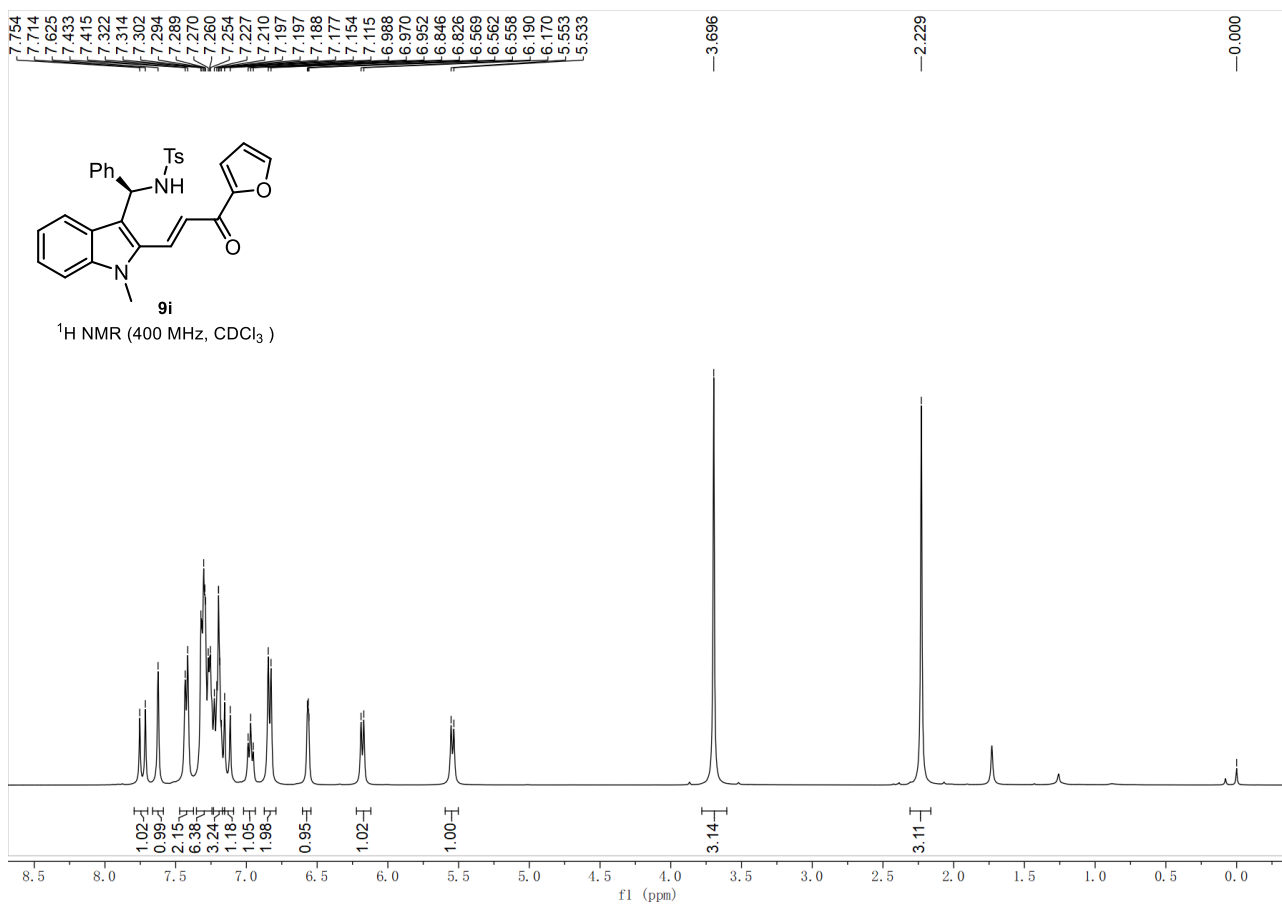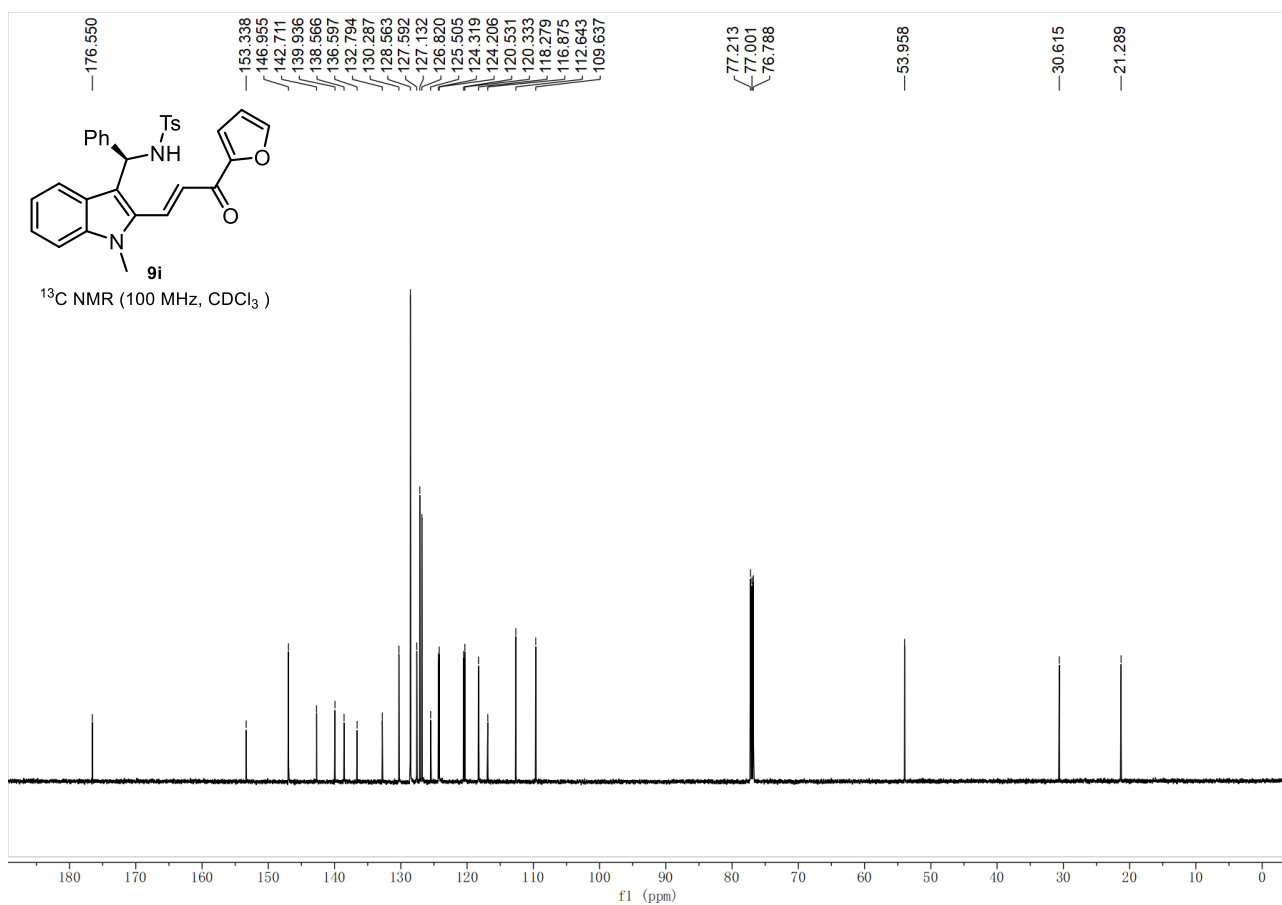

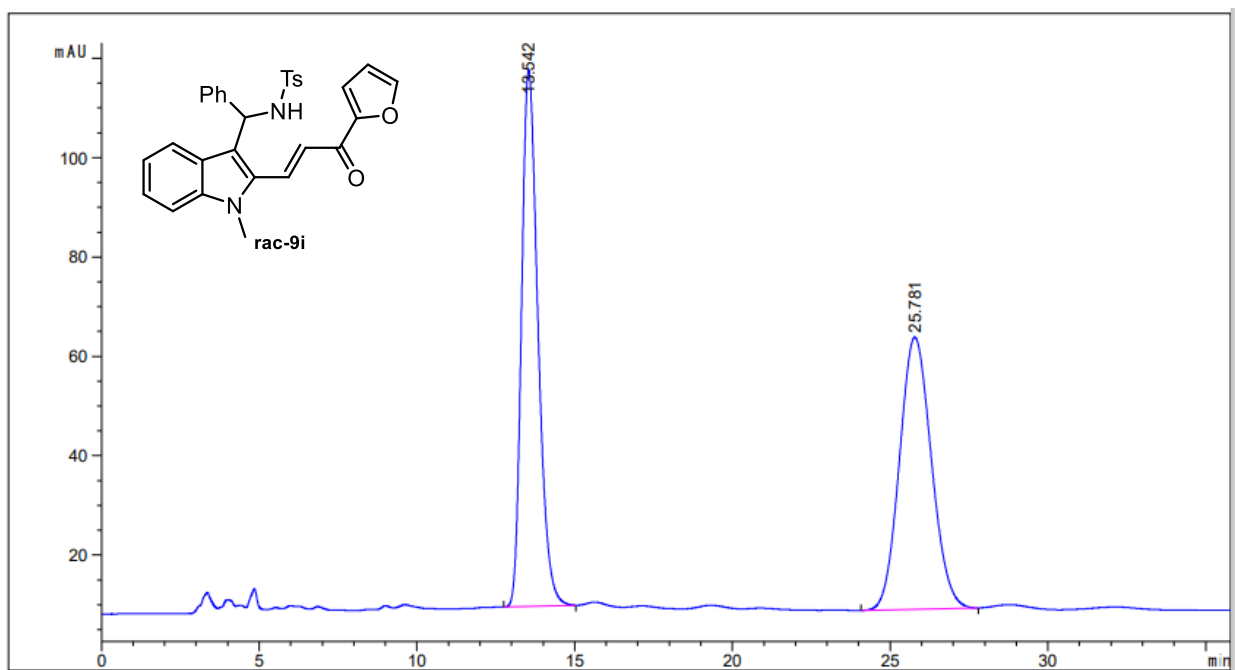

| # | [min]  | [min] | [mAU*s] | [mAU]      | %         |         |
|---|--------|-------|---------|------------|-----------|---------|
| 1 | 13.542 | BB    | 0.5564  | 3898.24414 | 108.02244 | 50.3727 |
| 2 | 25.781 | BB    | 1.0918  | 3840.55884 | 54.77457  | 49.6273 |

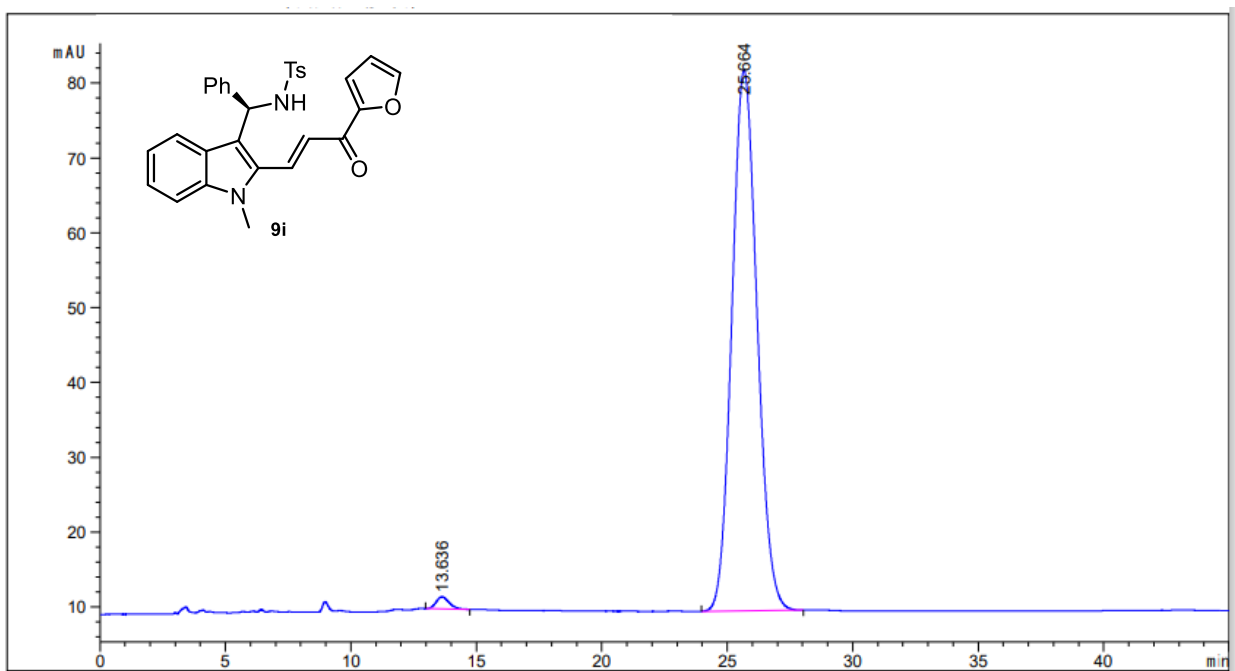

| # | [min]  | [min] | [mAU*s] | [mAU]      | %        |         |
|---|--------|-------|---------|------------|----------|---------|
| 1 | 13.636 | BB    | 0.5217  | 58.91714   | 1.62634  | 1.1582  |
| 2 | 25.664 | BB    | 1.0815  | 5027.89990 | 72.22445 | 98.8418 |

Name: CYC-20211129-44      Rack Pos.:  
Inj. Vol. (ul): 8      Plate Pos.:  
Data File: CYC-20211129-44.d      Method (Acq): ZYJ-20201106.m      Instrument: ZYJ-20201106.m      Instrument 1: Success      Operator: Success  
Acq. Time (Local): 12/1/2021 5:49:05 PM  
(UTC+08:00)

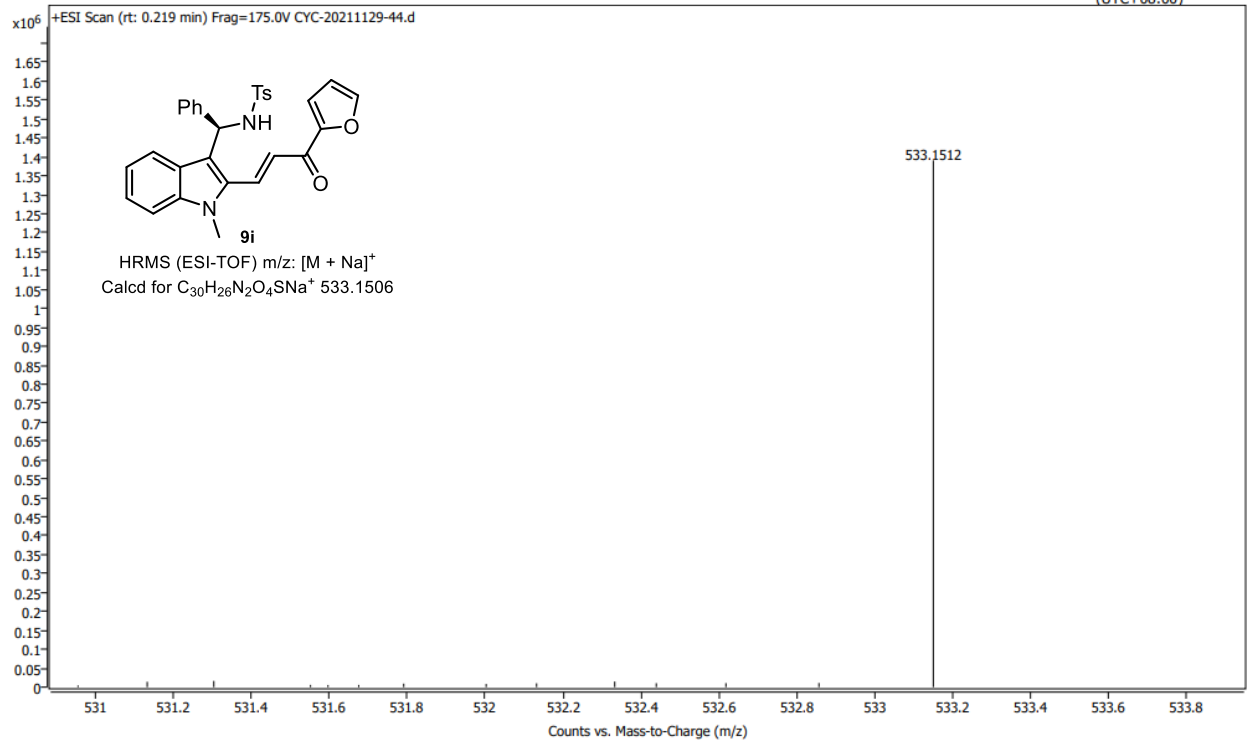

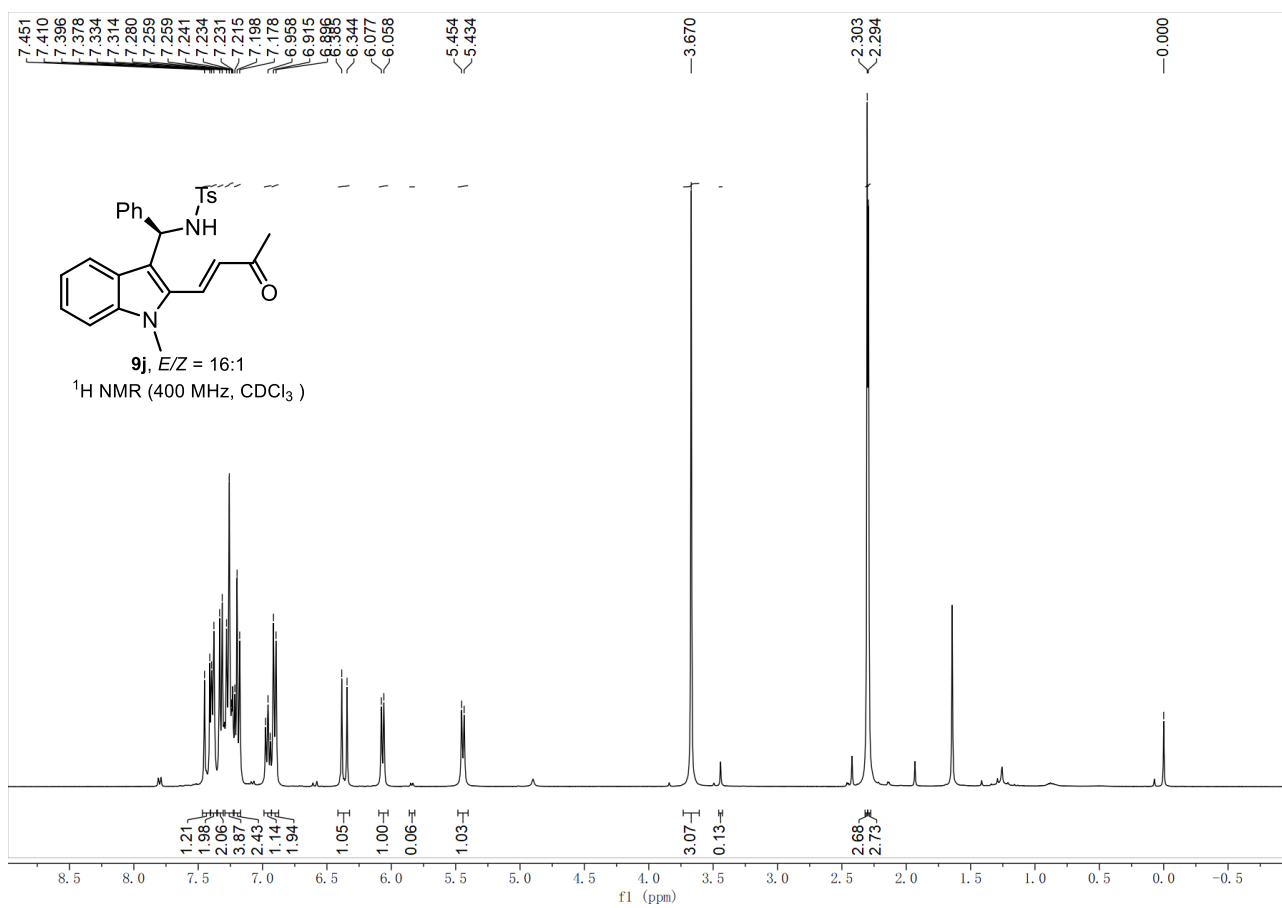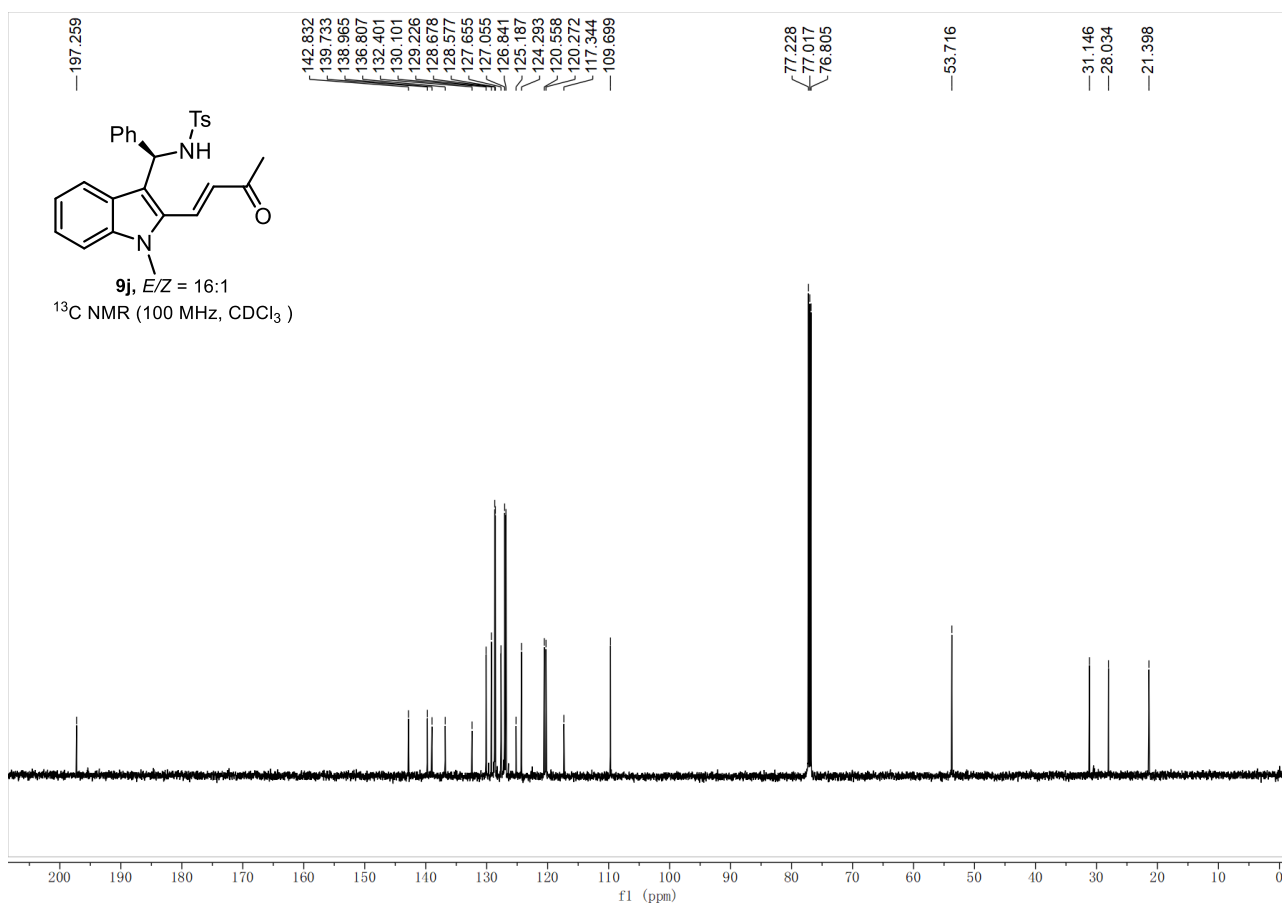

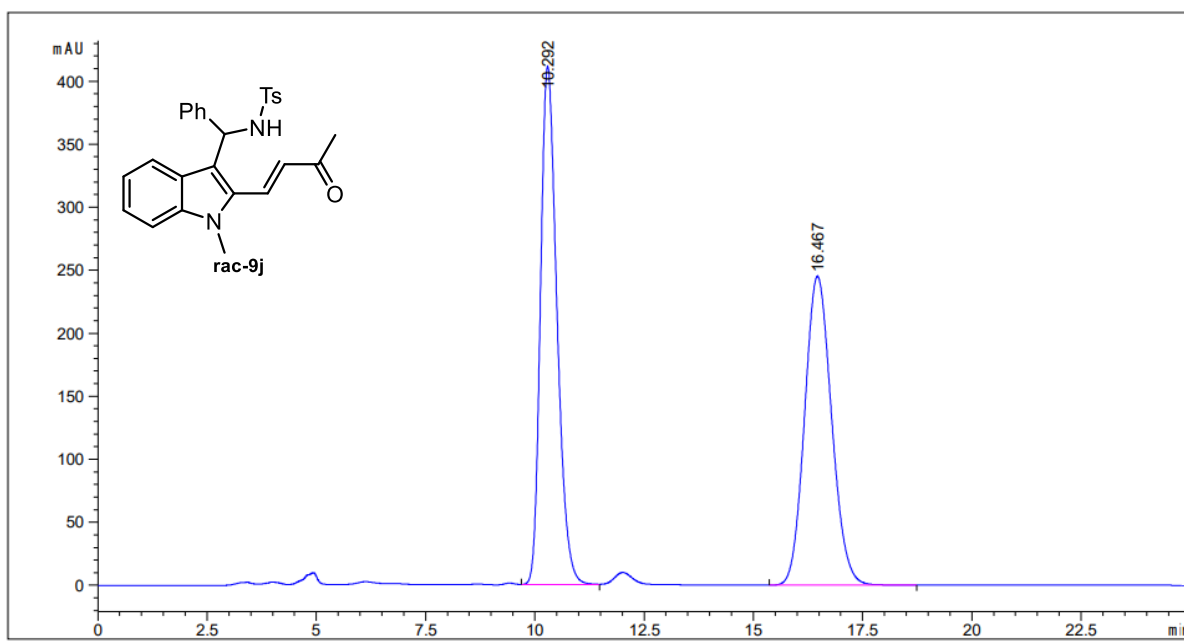

| # | [min]  | [min] | [mAU*s] | [mAU]     | %         |         |
|---|--------|-------|---------|-----------|-----------|---------|
| 1 | 10.292 | VB    | 0.4027  | 1.07586e4 | 411.27167 | 50.5925 |
| 2 | 16.467 | BB    | 0.6676  | 1.05066e4 | 245.09351 | 49.4075 |

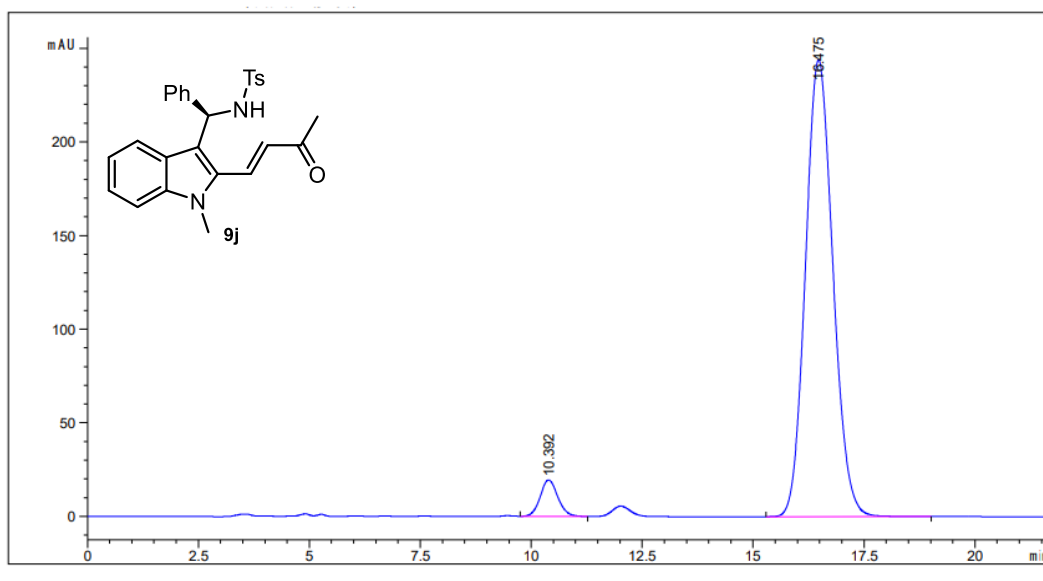

| # | [min]  | [min] | [mAU*s] | [mAU]     | %         |         |
|---|--------|-------|---------|-----------|-----------|---------|
| 1 | 10.392 | BBA   | 0.4227  | 533.86273 | 19.41428  | 4.8499  |
| 2 | 16.475 | BB    | 0.6683  | 1.04738e4 | 243.95703 | 95.1501 |

|                |                   |              |                |            |              |                                                    |
|----------------|-------------------|--------------|----------------|------------|--------------|----------------------------------------------------|
| Name           | CYC-20211129-45   | Rack Pos.    |                | Instrument | Instrument 1 | Operator                                           |
| Inj. Vol. (ul) | 8                 | Plate Pos.   |                | IRM Status | Success      |                                                    |
| Data File      | CYC-20211129-45.d | Method (Acq) | ZYJ-20201106.m | Comment    |              | Acq. Time (Local) 12/1/2021 5:52:02 PM (UTC+08:00) |

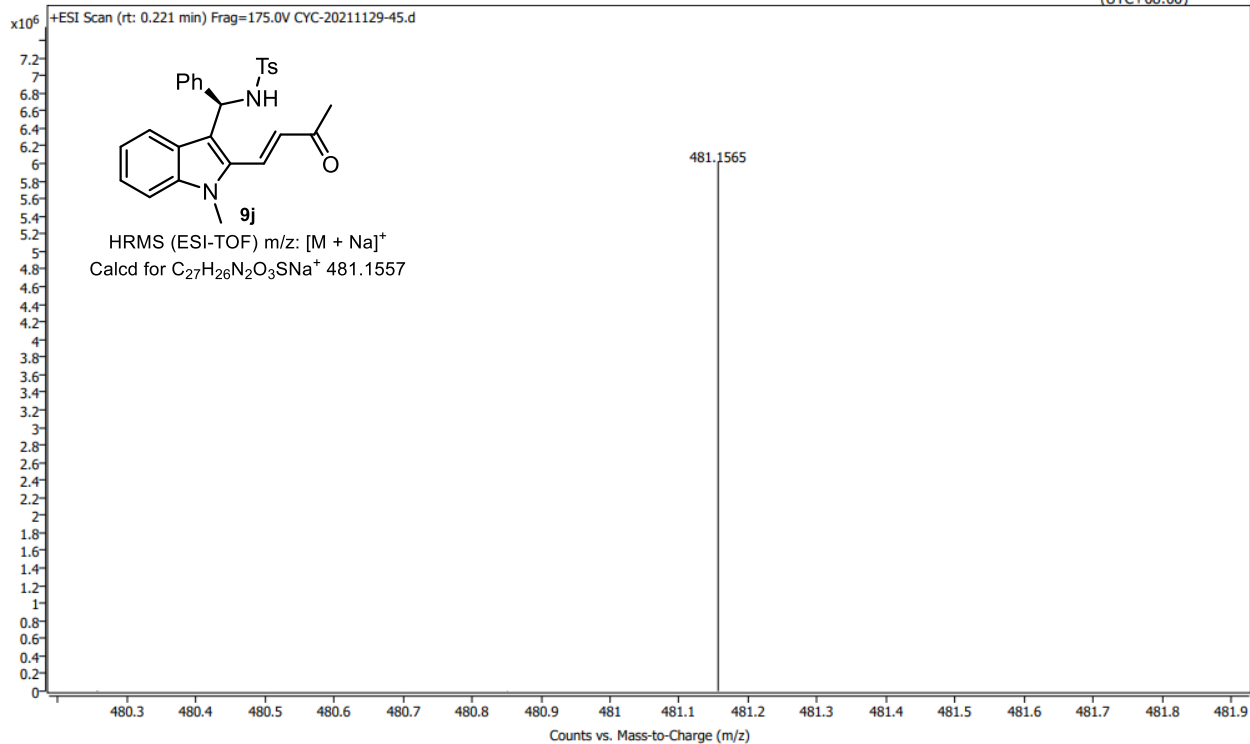

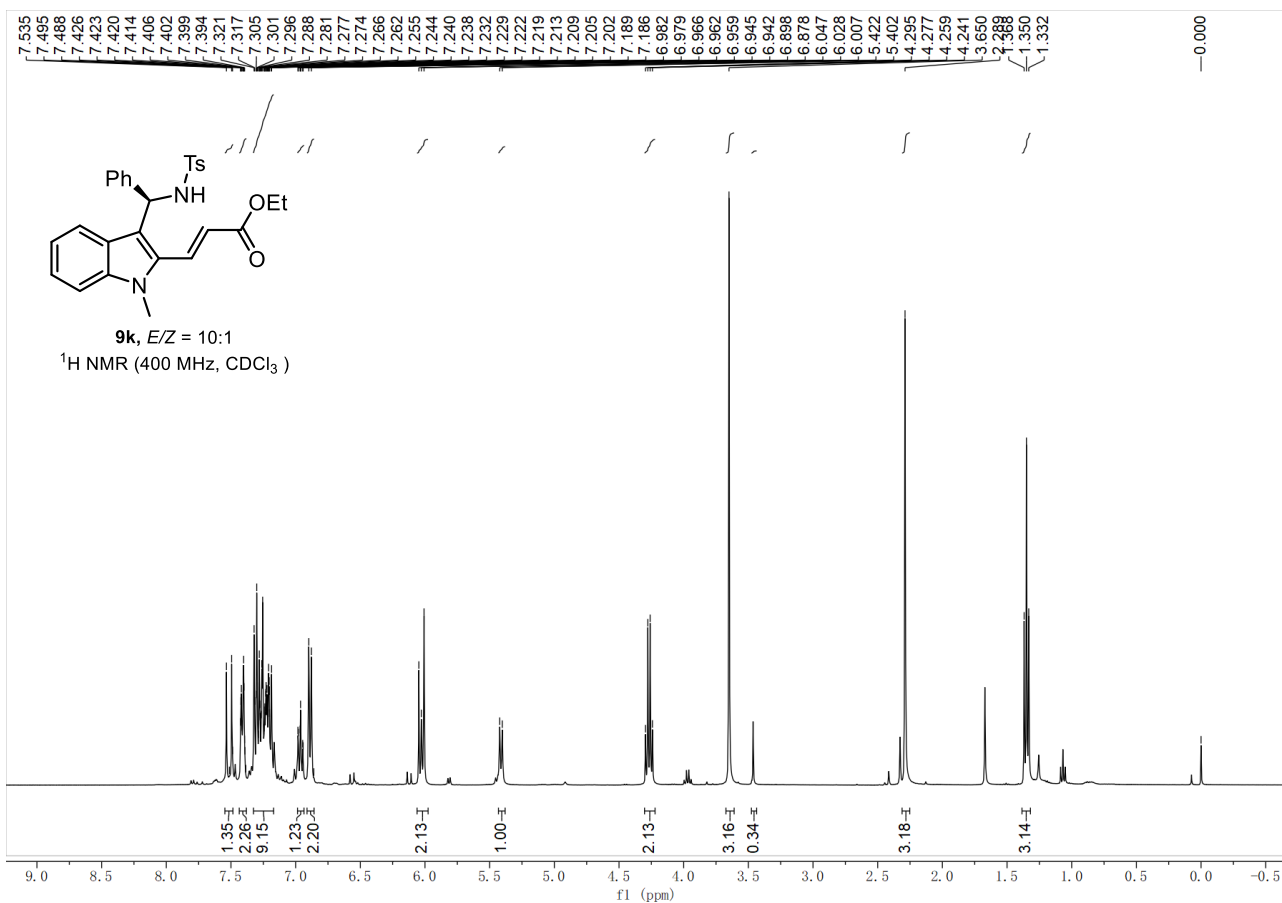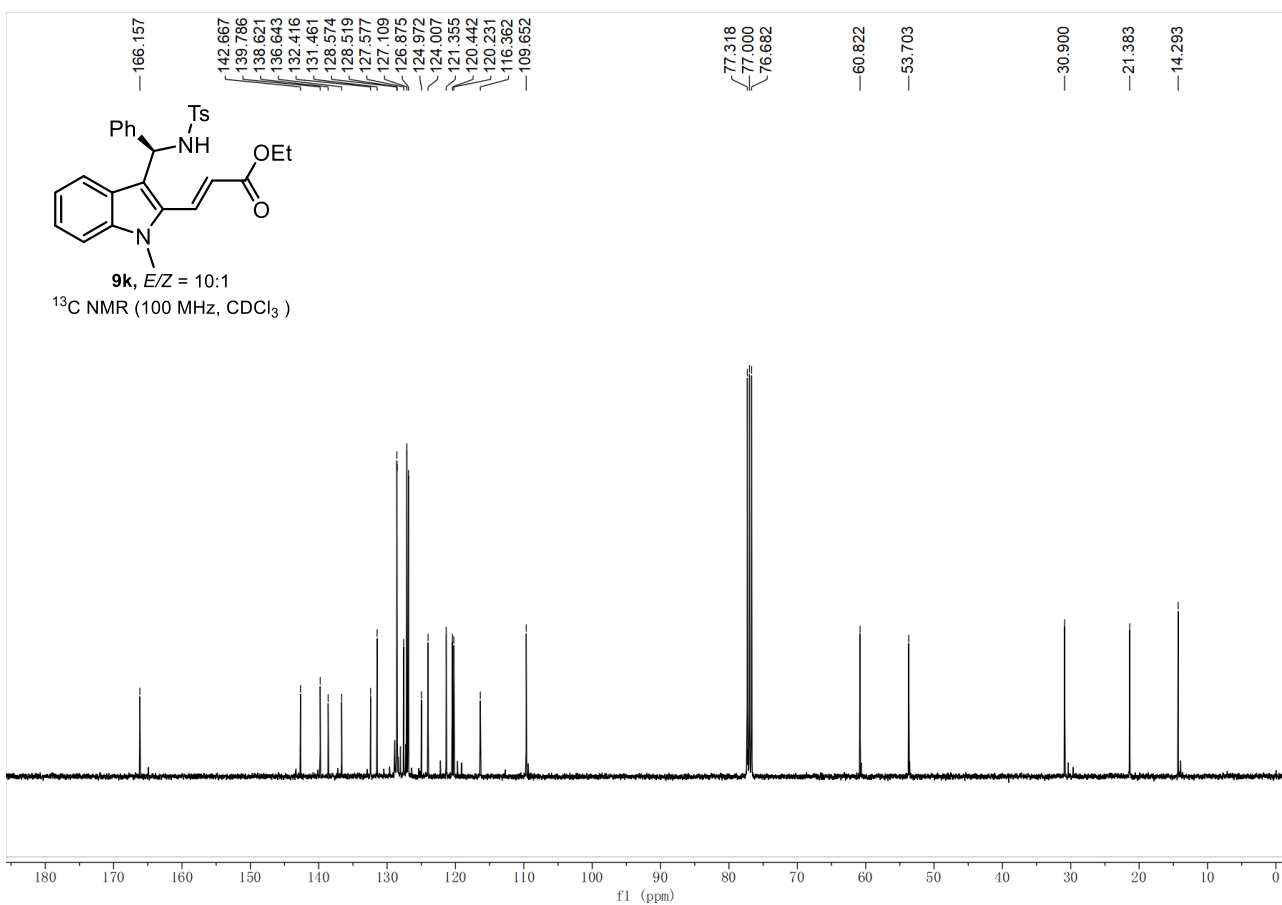

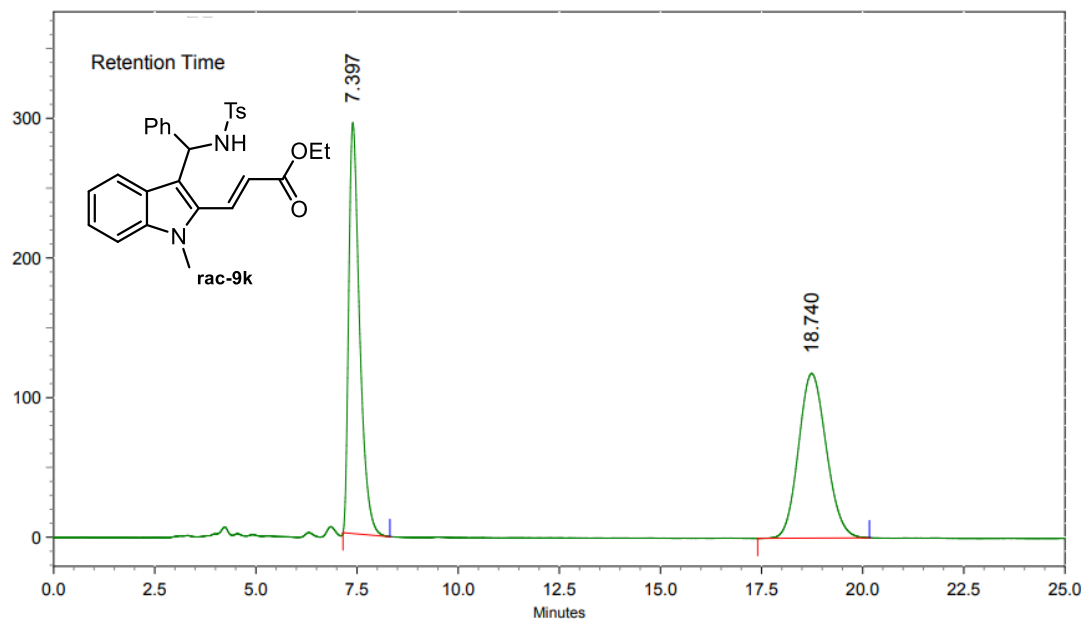

### AREA PERCENT REPORT

| Peak No. | Ret Time | Width | Height  | Area     | Area [%] |
|----------|----------|-------|---------|----------|----------|
| 1        | 7.397    | 1.160 | 4936632 | 92519742 | 49.4281  |
| 2        | 18.740   | 2.763 | 1977249 | 94660544 | 50.5719  |

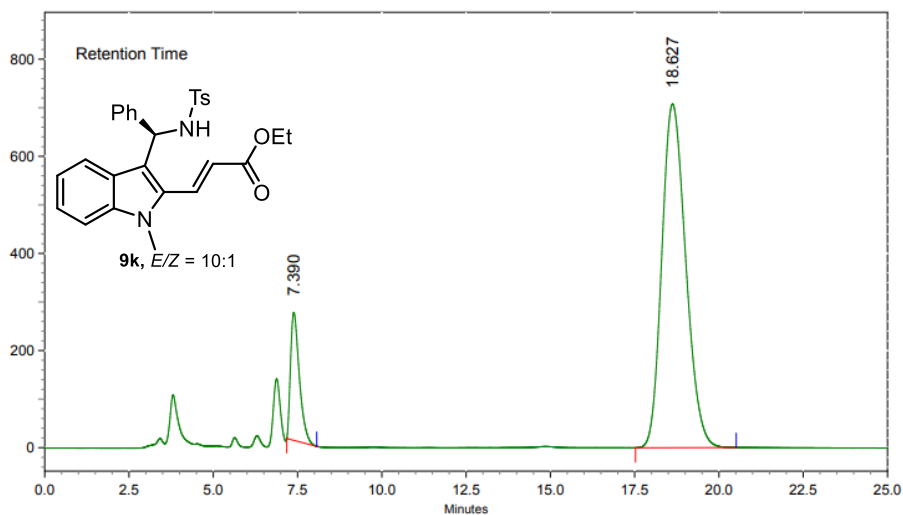

### AREA PERCENT REPORT

| Peak No. | Ret Time | Width | Height   | Area      | Area [%] |
|----------|----------|-------|----------|-----------|----------|
| 1        | 7.390    | 0.890 | 4420301  | 80351244  | 12.0741  |
| 2        | 18.627   | 2.987 | 11874025 | 585132245 | 87.9259  |



|                |                   |              |                |            |              |                   |                                     |
|----------------|-------------------|--------------|----------------|------------|--------------|-------------------|-------------------------------------|
| Name           | CYC-20211129-52   | Rack Pos.    |                | Instrument | Instrument 1 | Operator          |                                     |
| Inj. Vol. (ul) | 8                 | Plate Pos.   |                | IRM Status | Success      |                   |                                     |
| Data File      | CYC-20211129-52.d | Method (Acq) | ZYJ-20201106.m | Comment    |              | Acq. Time (Local) | 12/1/2021 6:12:56 PM<br>(UTC+08:00) |

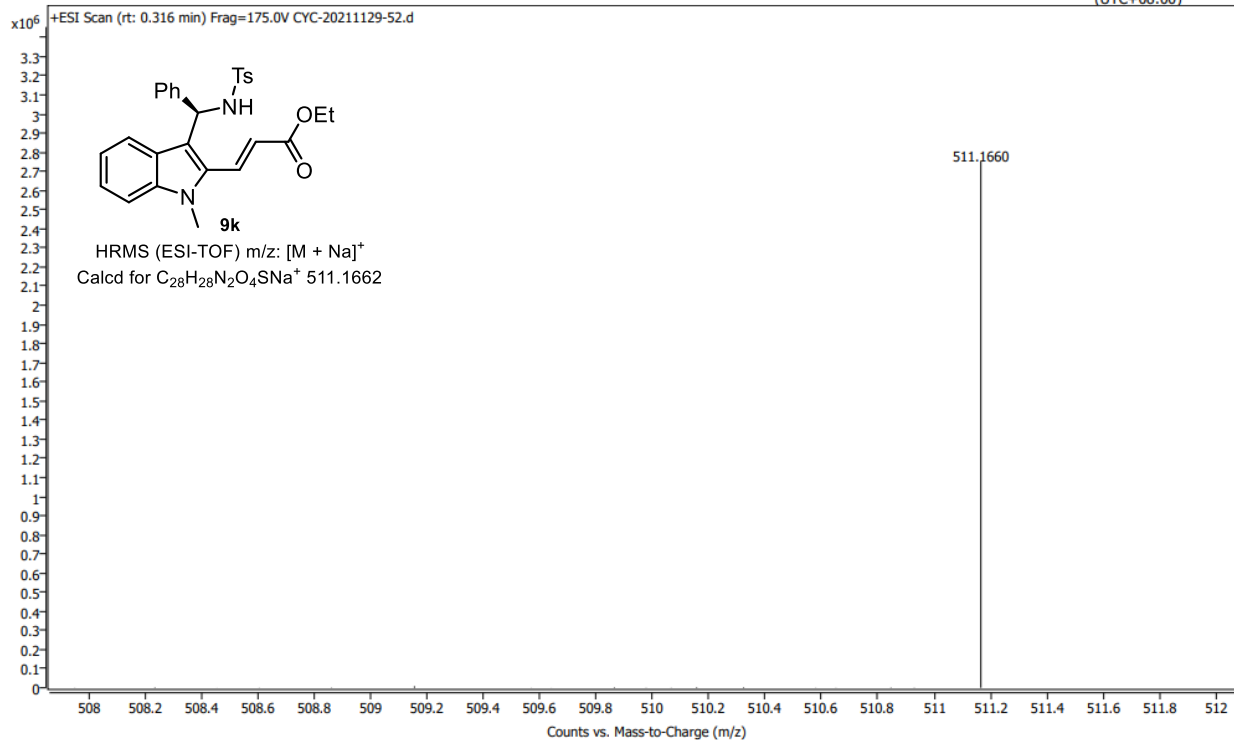

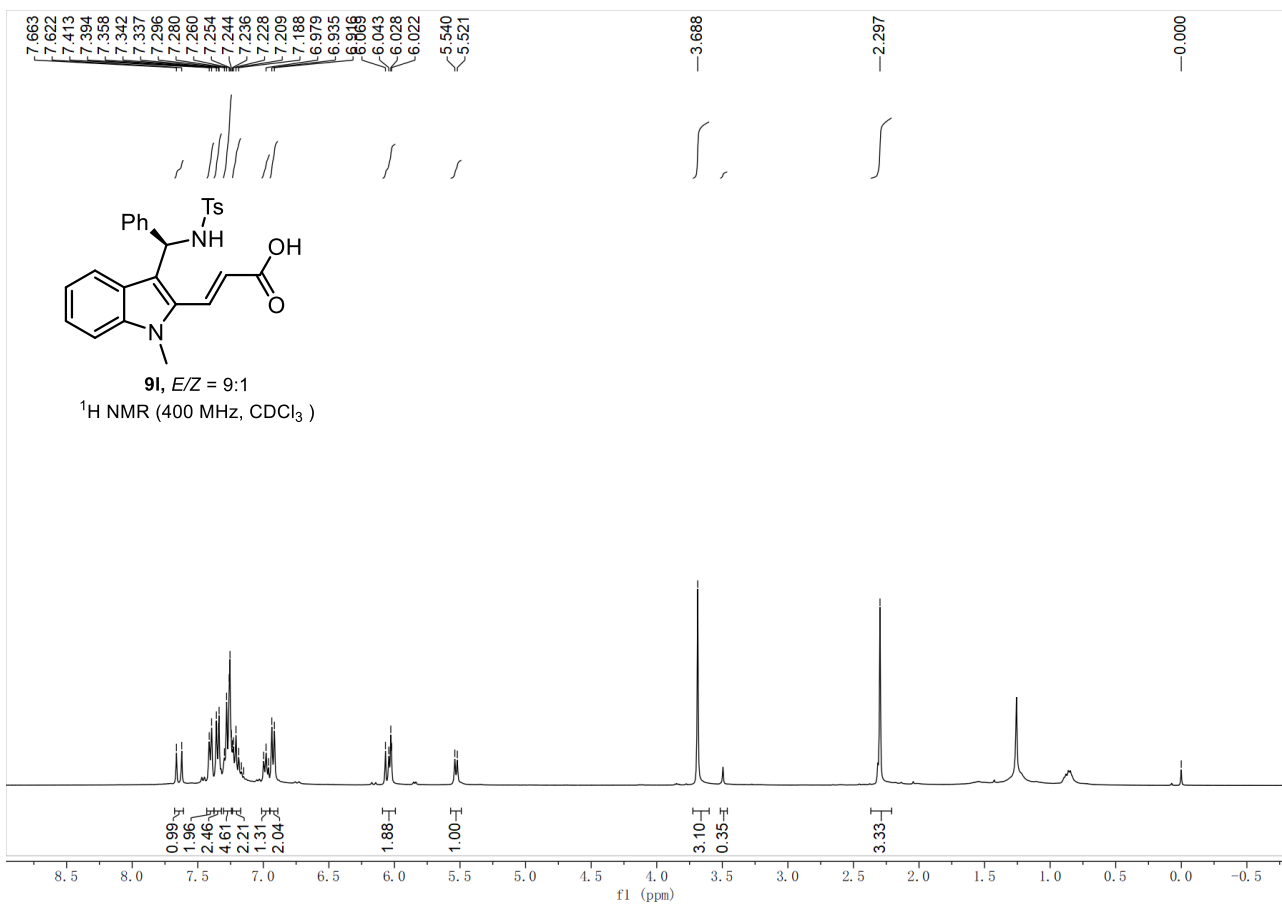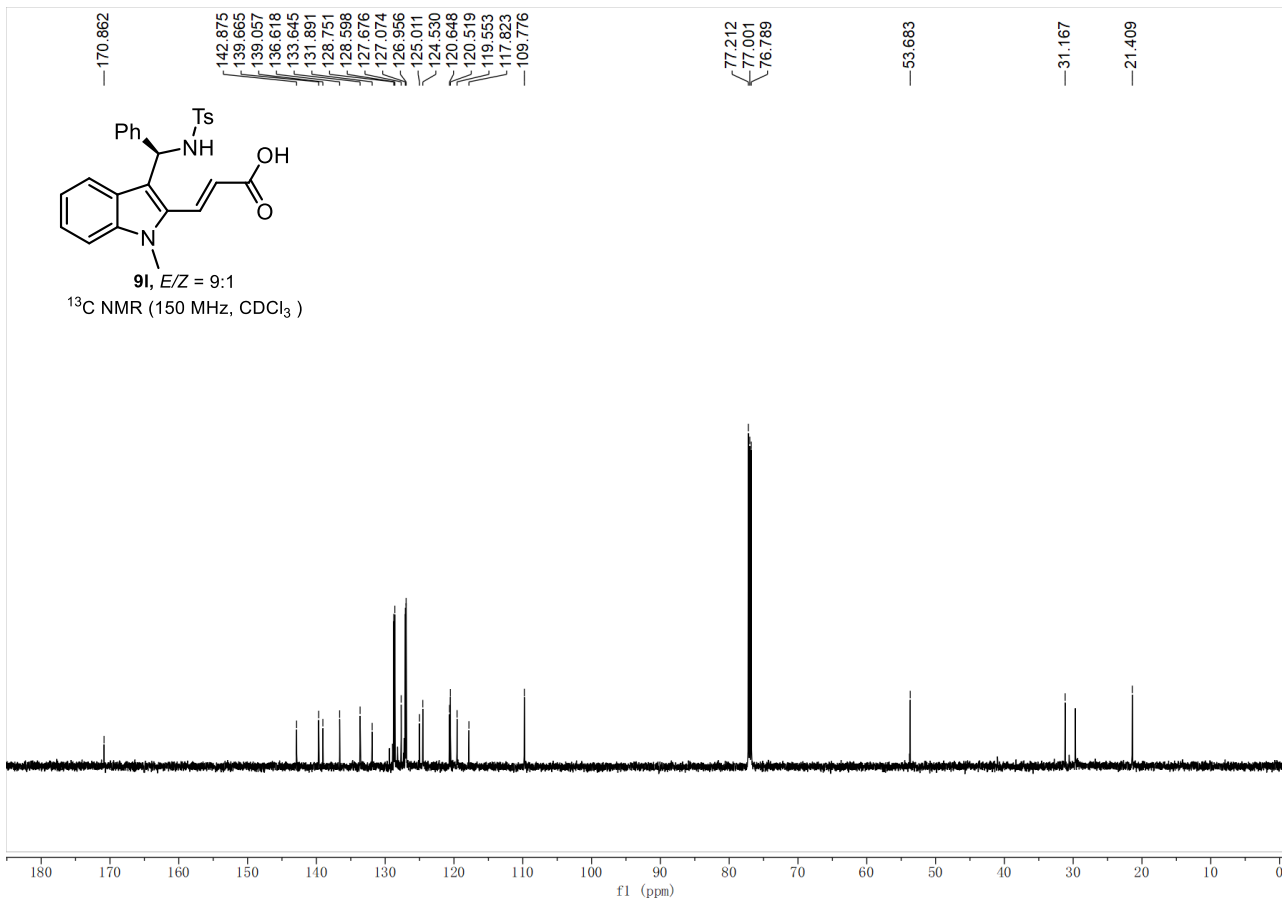

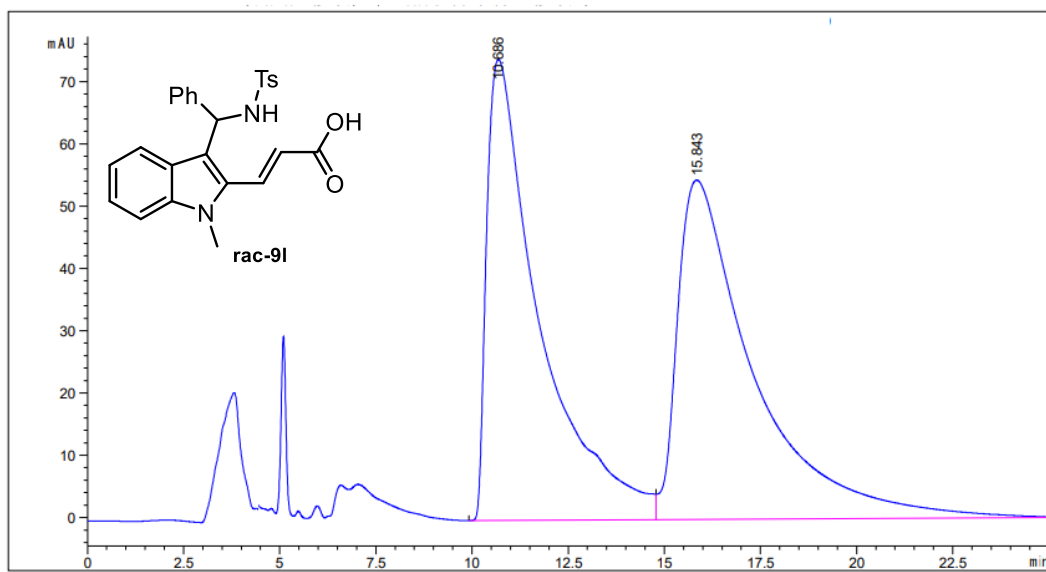

| # | [min]      | [min]  | [mAU*s]    | [mAU]    | %       |
|---|------------|--------|------------|----------|---------|
| 1 | 10.686 BV  | 1.3441 | 7067.25732 | 74.01096 | 48.5016 |
| 2 | 15.843 VBA | 1.9038 | 7503.93066 | 54.48624 | 51.4984 |

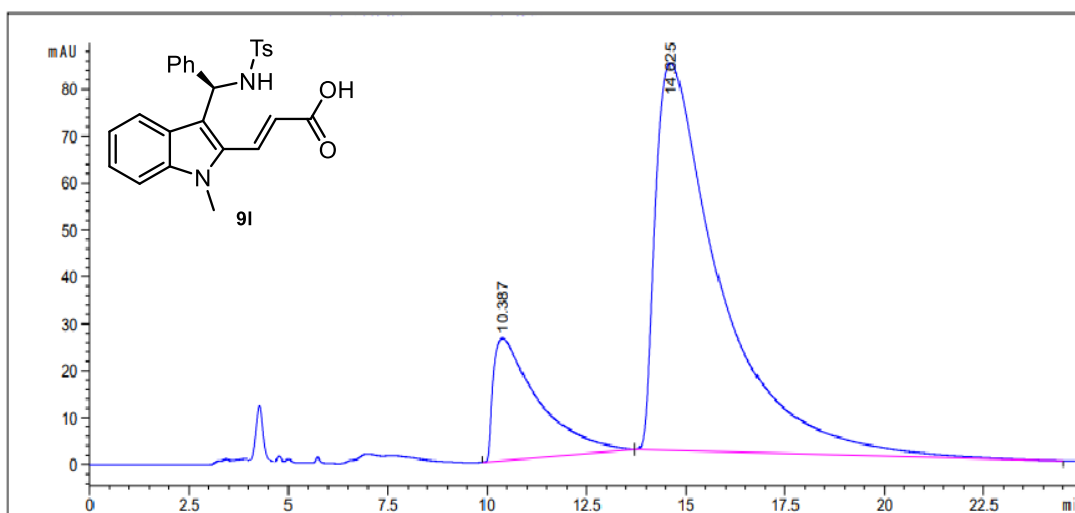

| # | [min]     | [min]  | [mAU*s]    | [mAU]    | %       |
|---|-----------|--------|------------|----------|---------|
| 1 | 10.387 BB | 1.0978 | 2069.87354 | 26.12100 | 18.1252 |
| 2 | 14.625 BB | 1.5990 | 9350.00781 | 82.58299 | 81.8748 |

|                |                   |              |                |            |              |                                     |
|----------------|-------------------|--------------|----------------|------------|--------------|-------------------------------------|
| Name           | CYC-20211129-51   | Rack Pos.    |                | Instrument | Instrument 1 | Operator                            |
| Inj. Vol. (ul) | 8                 | Plate Pos.   |                | IRM Status | Success      |                                     |
| Data File      | CYC-20211129-51.d | Method (Acq) | ZYJ-20201106.m | Comment    |              | Acq. Time (Local)                   |
|                |                   |              |                |            |              | 12/1/2021 6:09:59 PM<br>(UTC+08:00) |

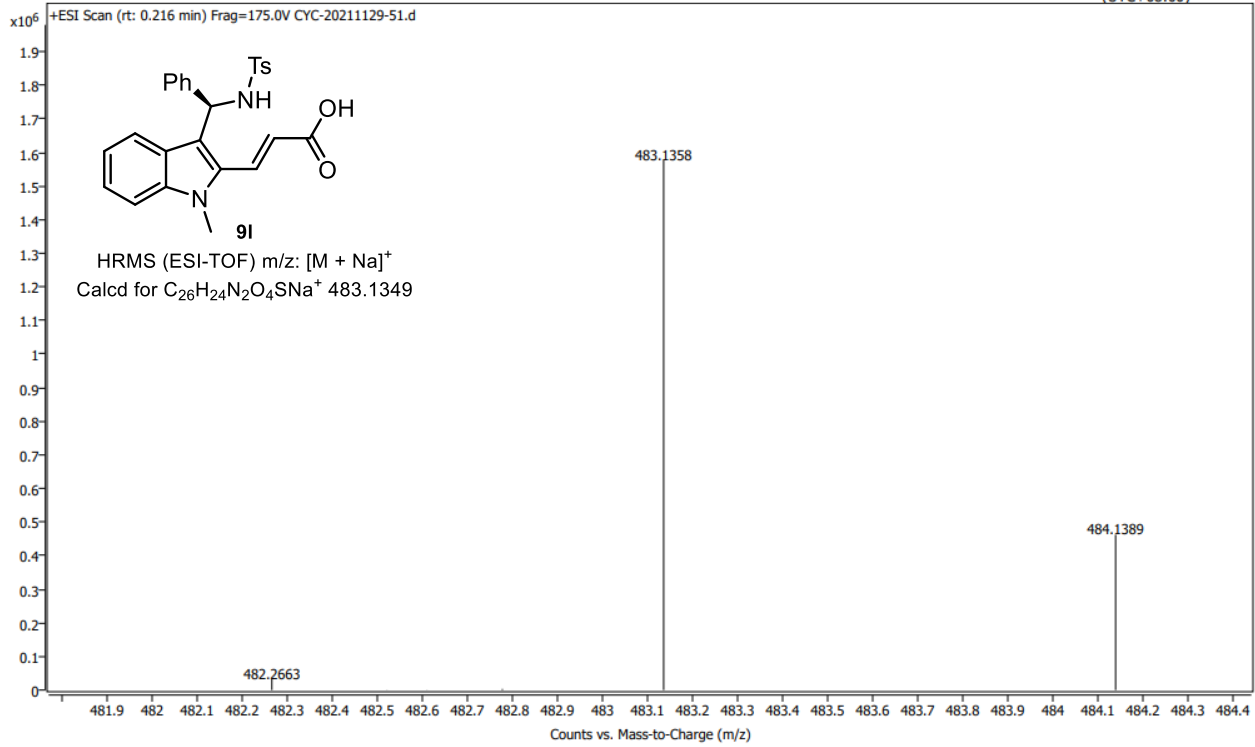

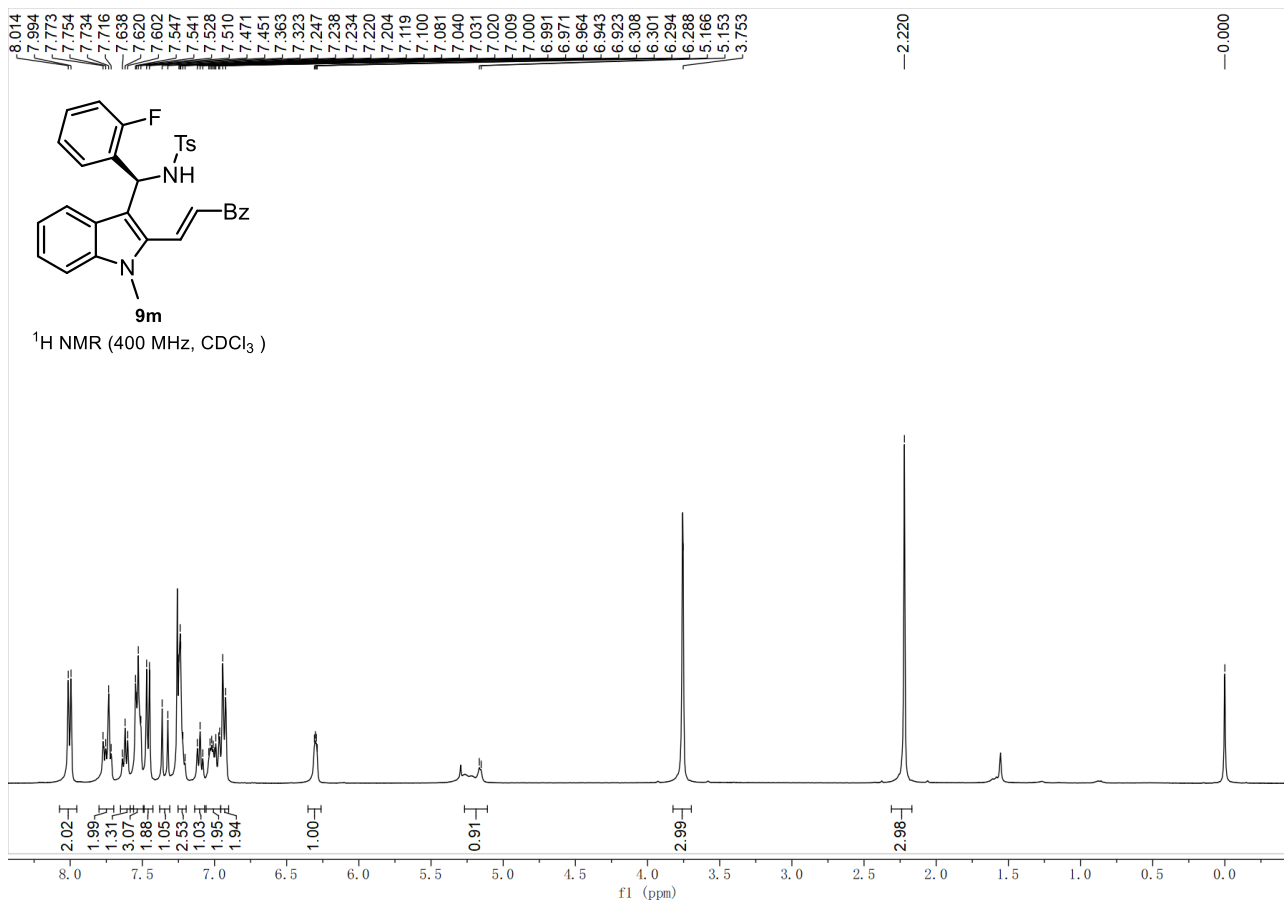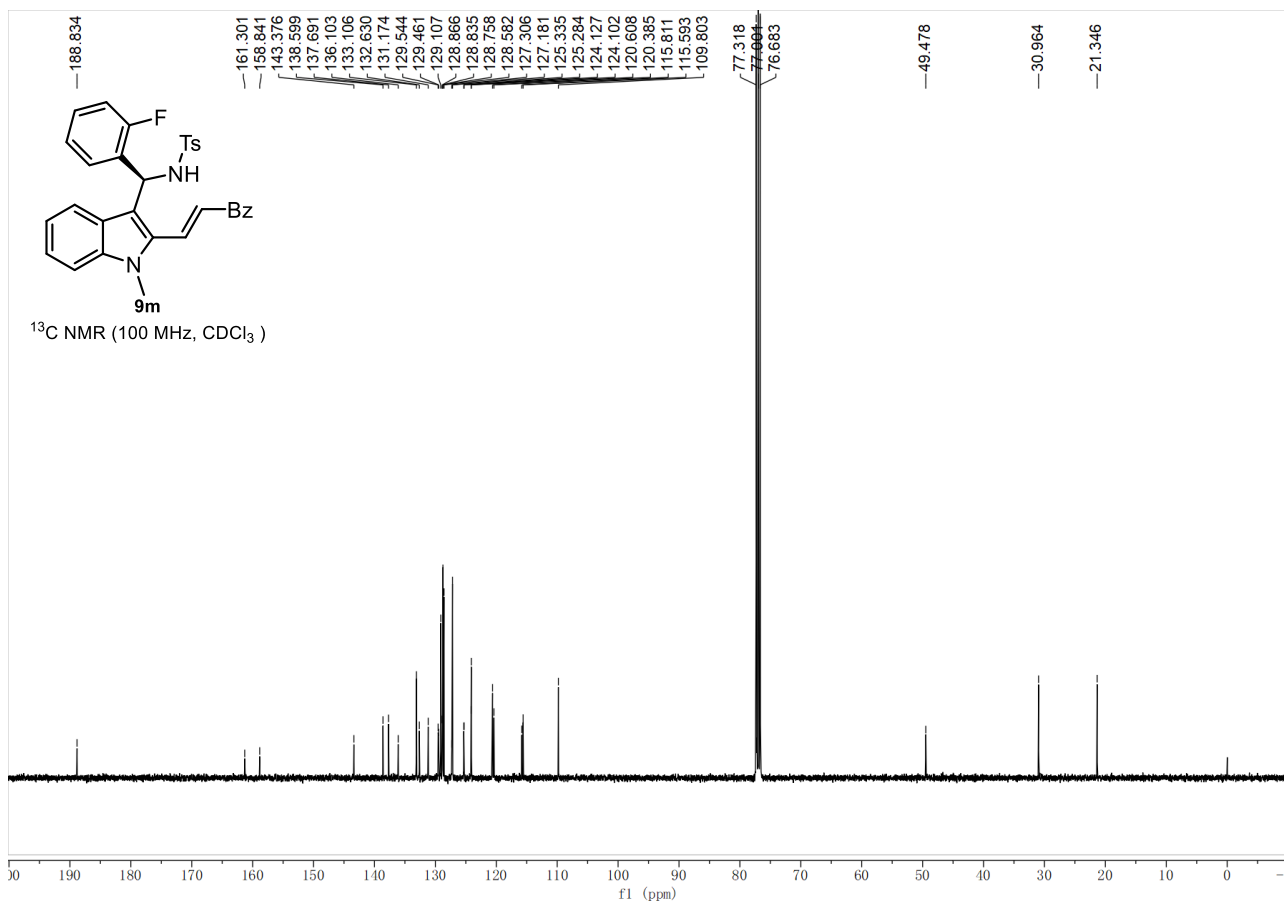

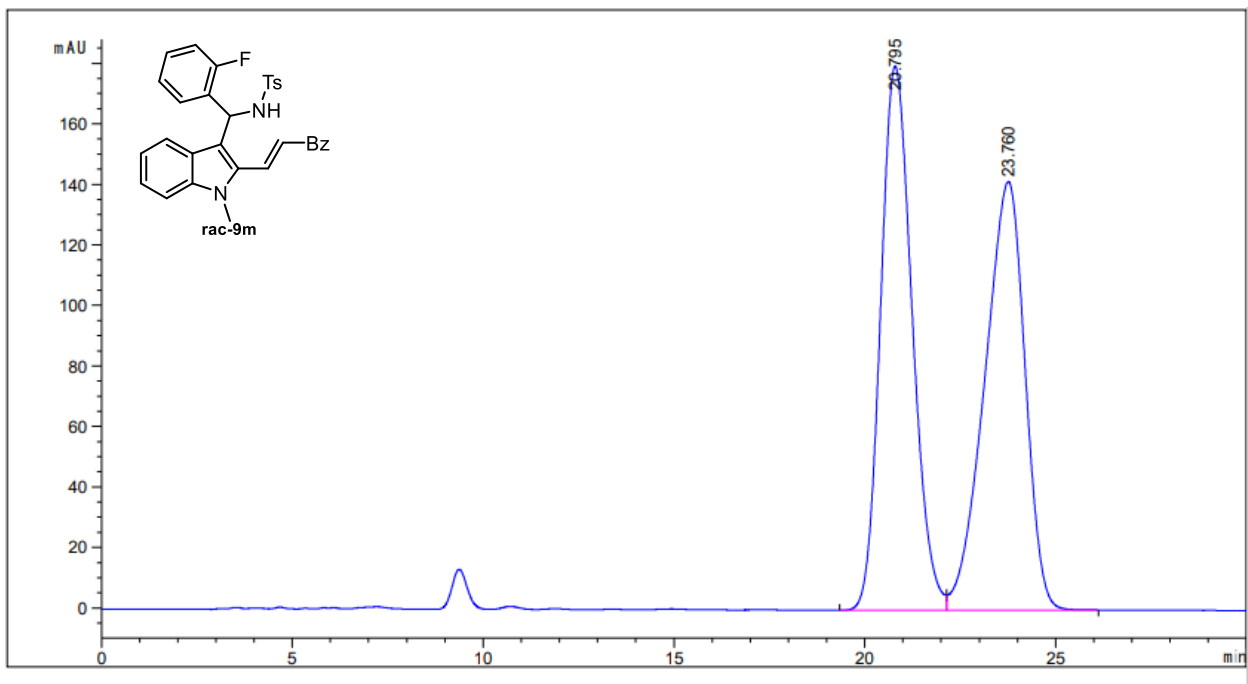

| # | [min]      | [min]  | [mAU*s]   | [mAU]     | %       |
|---|------------|--------|-----------|-----------|---------|
| 1 | 20.795 BV  | 0.8973 | 1.03498e4 | 179.77708 | 49.8935 |
| 2 | 23.760 VBA | 1.1228 | 1.03939e4 | 141.60875 | 50.1065 |

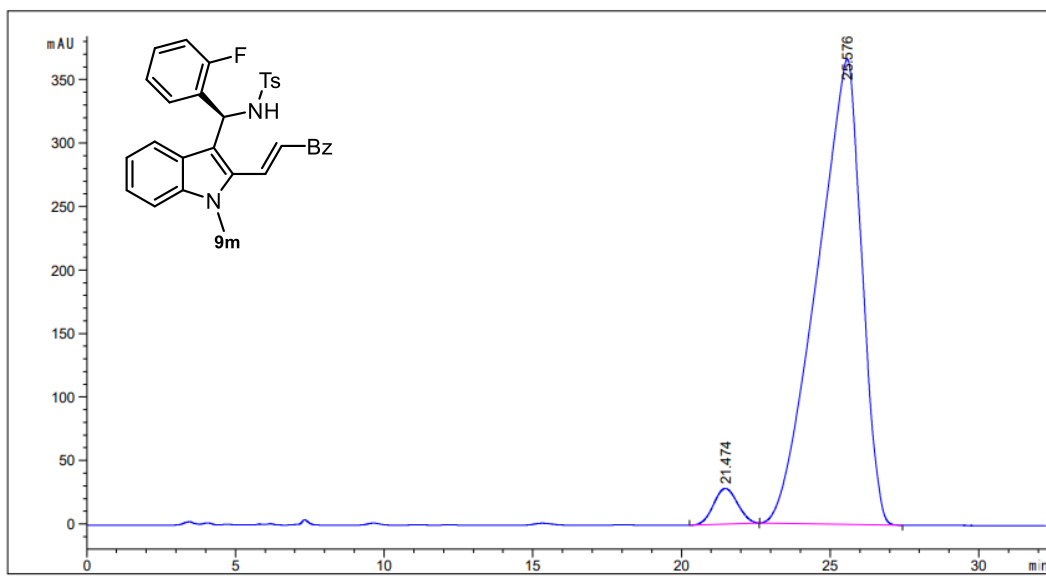

| # | [min]     | [min]  | [mAU*s]    | [mAU]     | %       |
|---|-----------|--------|------------|-----------|---------|
| 1 | 21.474 BB | 0.8831 | 1579.38049 | 28.15120  | 3.9808  |
| 2 | 25.576 BB | 1.4125 | 3.80957e4  | 366.39322 | 96.0192 |

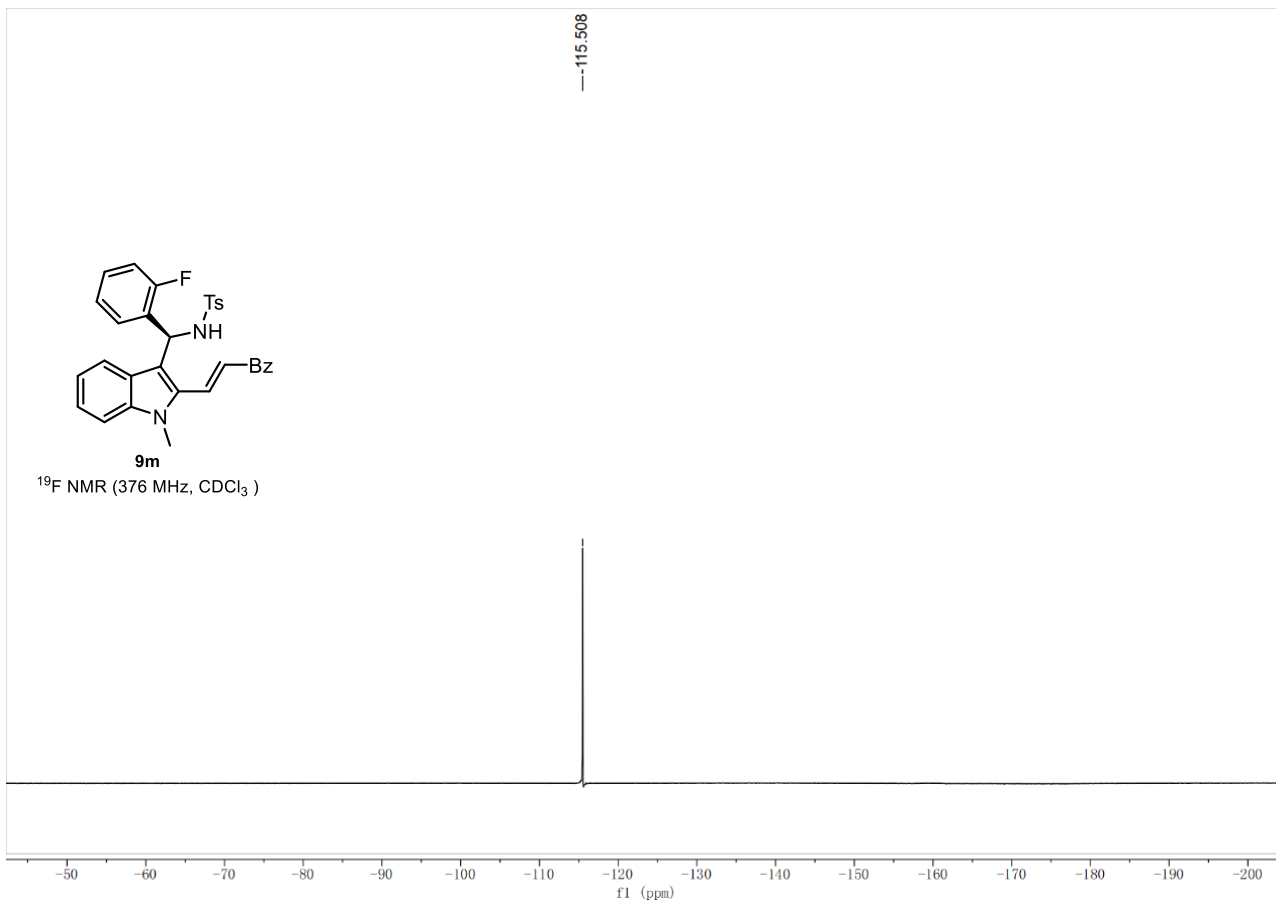

| Name           | CYC-20211122-6   | Rack Pos.    | Instrument     | Instrument 1 | Operator                                            |
|----------------|------------------|--------------|----------------|--------------|-----------------------------------------------------|
| Inj. Vol. (ul) | 8                | Plate Pos.   | IRM Status     | Success      |                                                     |
| Data File      | CYC-20211122-6.d | Method (Acq) | ZYJ-20201106.m | Comment      | Acq. Time (Local) 11/25/2021 4:28:18 PM (UTC+08:00) |

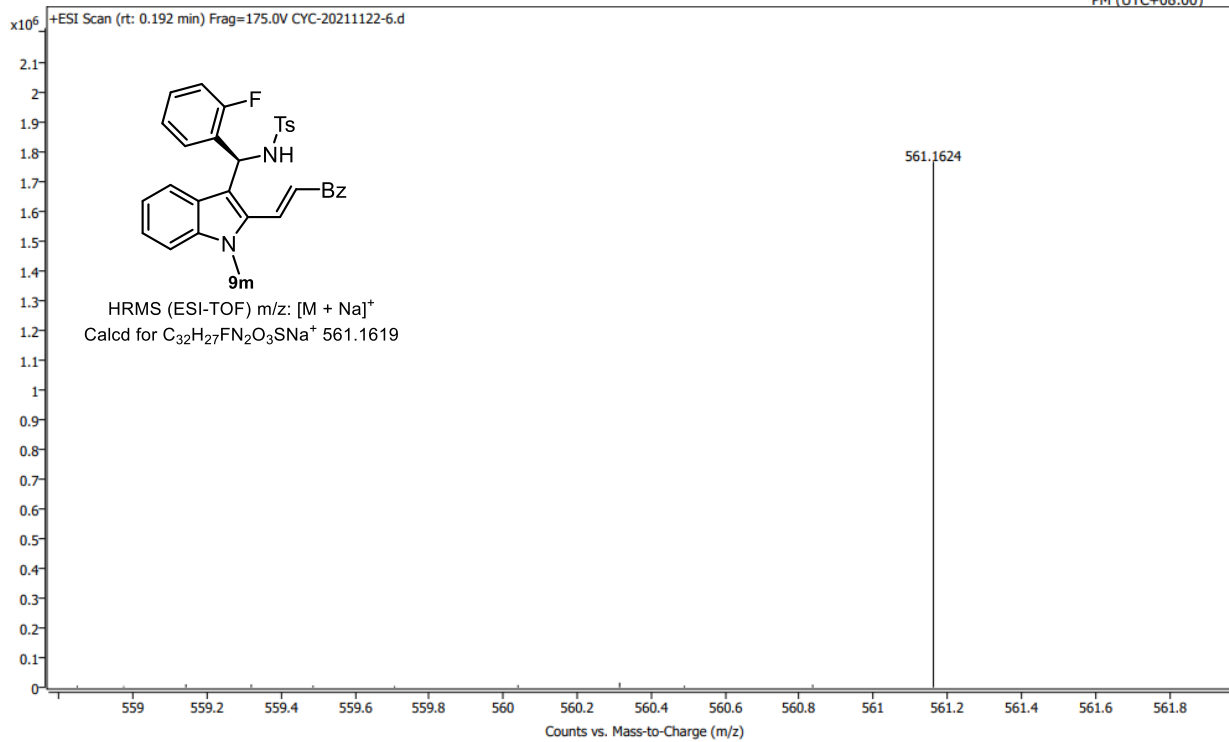

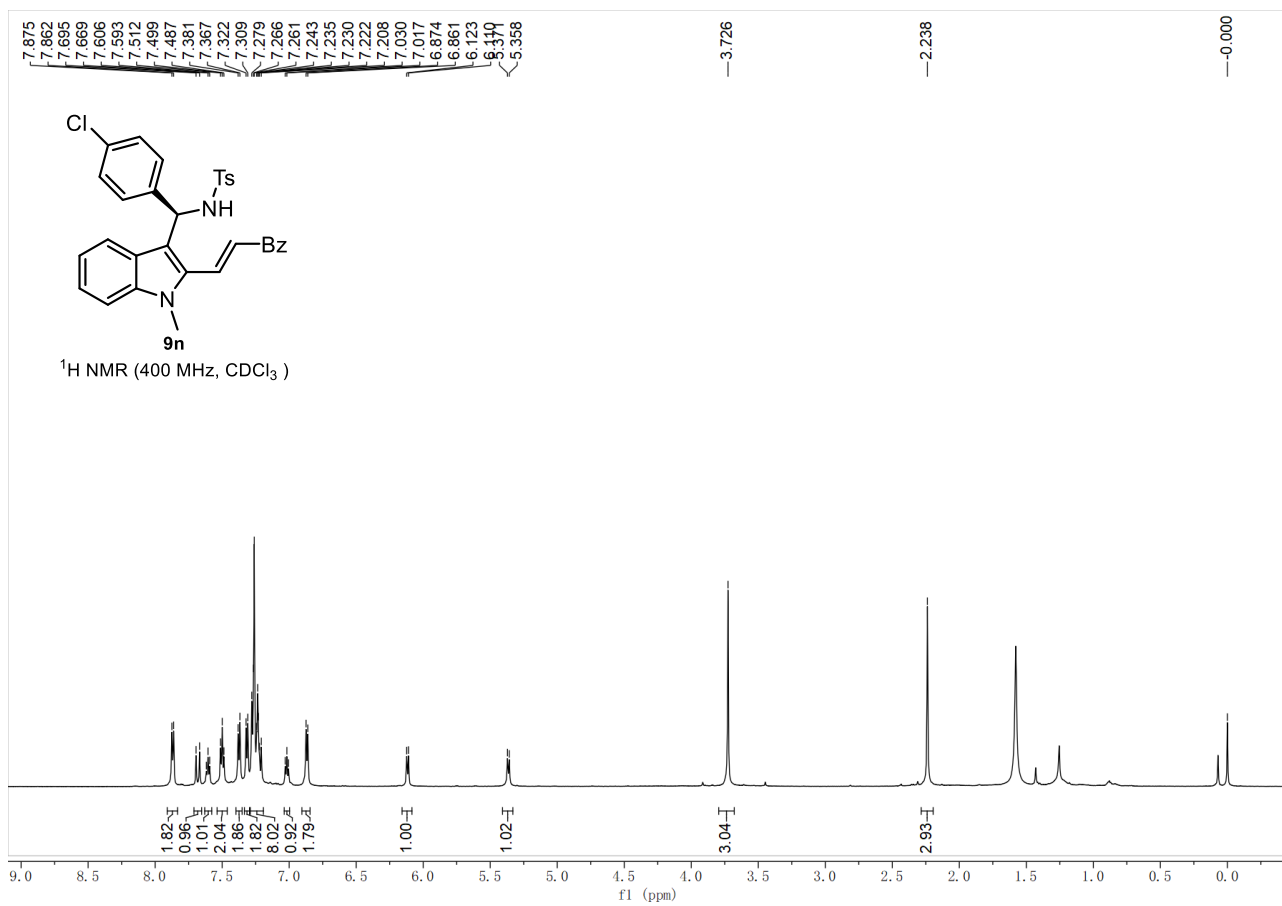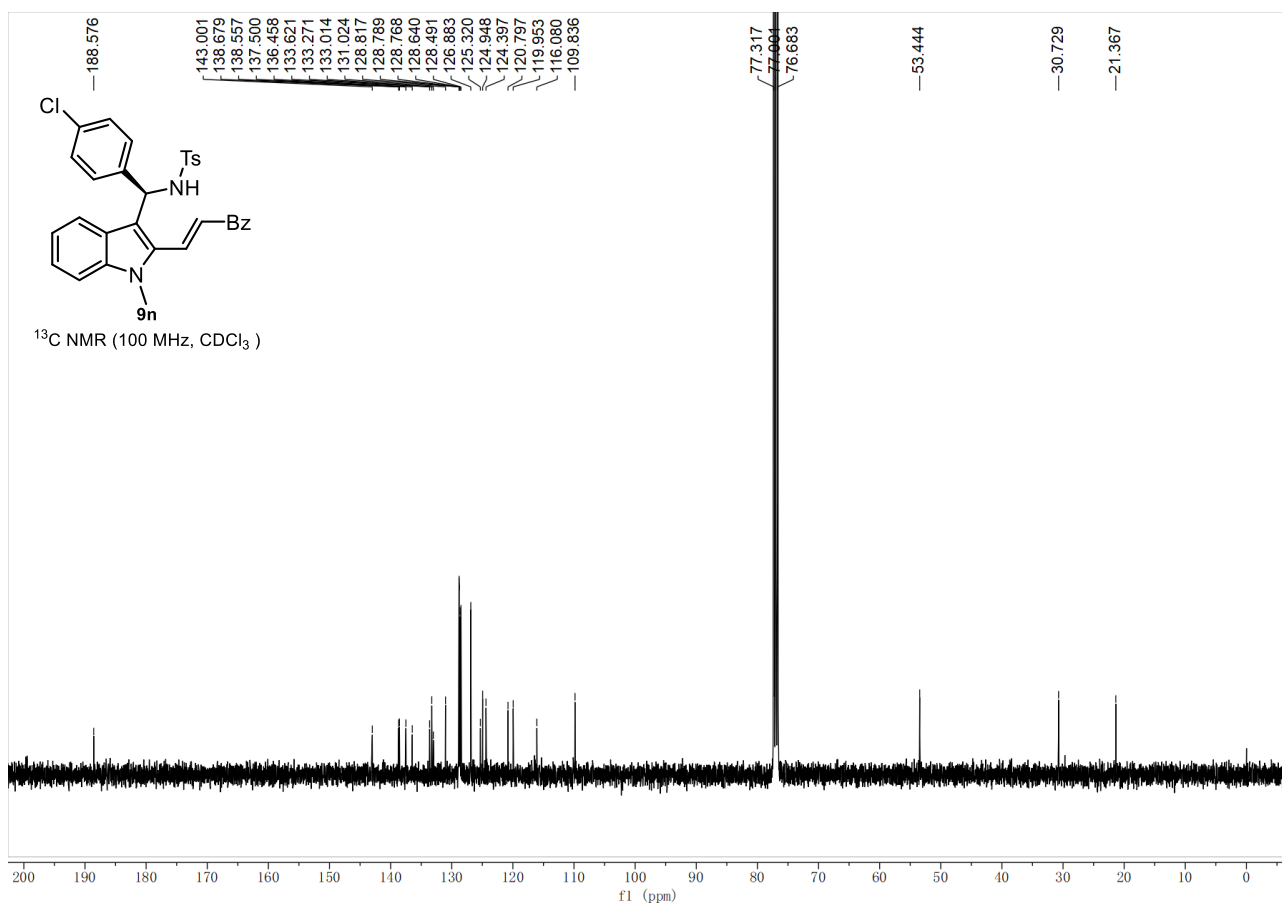



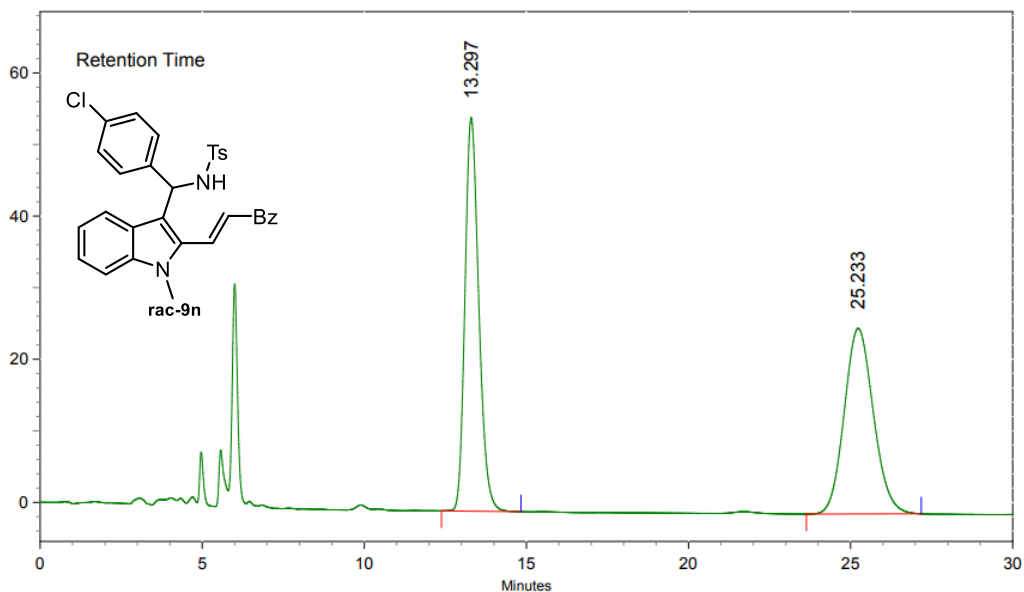

### AREA PERCENT REPORT

| Peak No. | Ret Time | Width | Height | Area     | Area [%] |
|----------|----------|-------|--------|----------|----------|
| 1        | 13.297   | 2.453 | 922603 | 27319036 | 50.0964  |
| 2        | 25.233   | 3.543 | 434887 | 27213883 | 49.9036  |

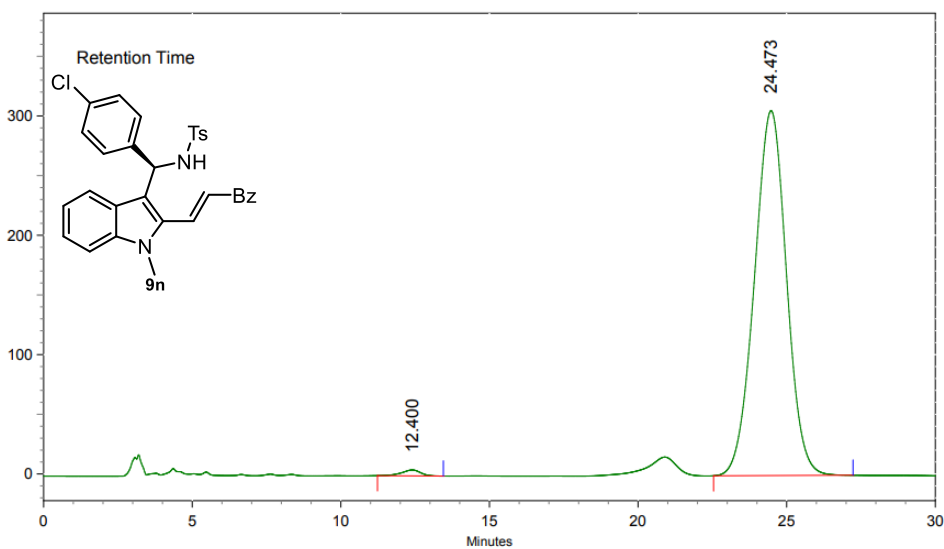

### AREA PERCENT REPORT

| Peak No. | Ret Time | Width | Height  | Area      | Area [%] |
|----------|----------|-------|---------|-----------|----------|
| 1        | 12.400   | 2.217 | 83826   | 3716754   | 0.9574   |
| 2        | 24.473   | 4.693 | 5129430 | 384479094 | 99.0426  |

|                |                  |              |                |              |                                   |
|----------------|------------------|--------------|----------------|--------------|-----------------------------------|
| Name           | CYC-20211122-4   | Rack Pos.    | Instrument     | Instrument 1 | Operator                          |
| Inj. Vol. (ul) | 8                | Plate Pos.   | IRM Status     | Success      |                                   |
| Data File      | CYC-20211122-4.d | Method (Acq) | ZYJ-20201106.m | Comment      | Acq. Time (Local)                 |
|                |                  |              |                |              | 11/25/2021 4:18:25 PM (UTC+08:00) |

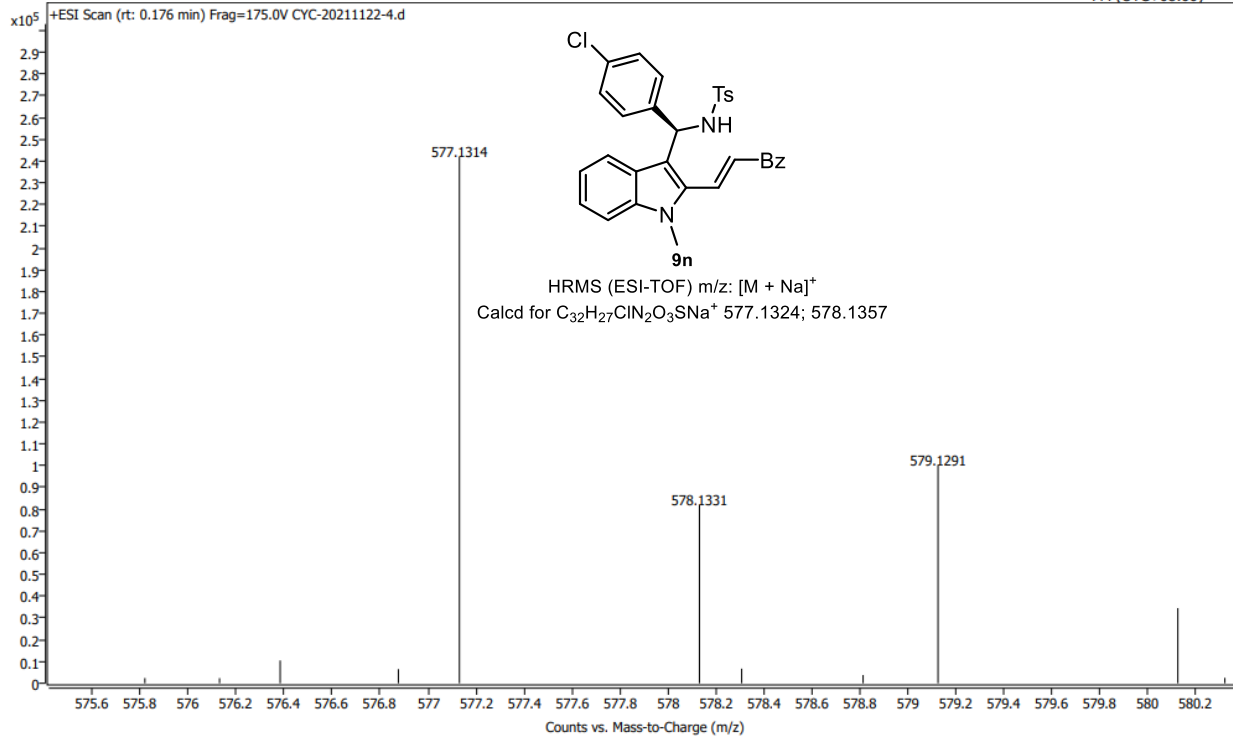

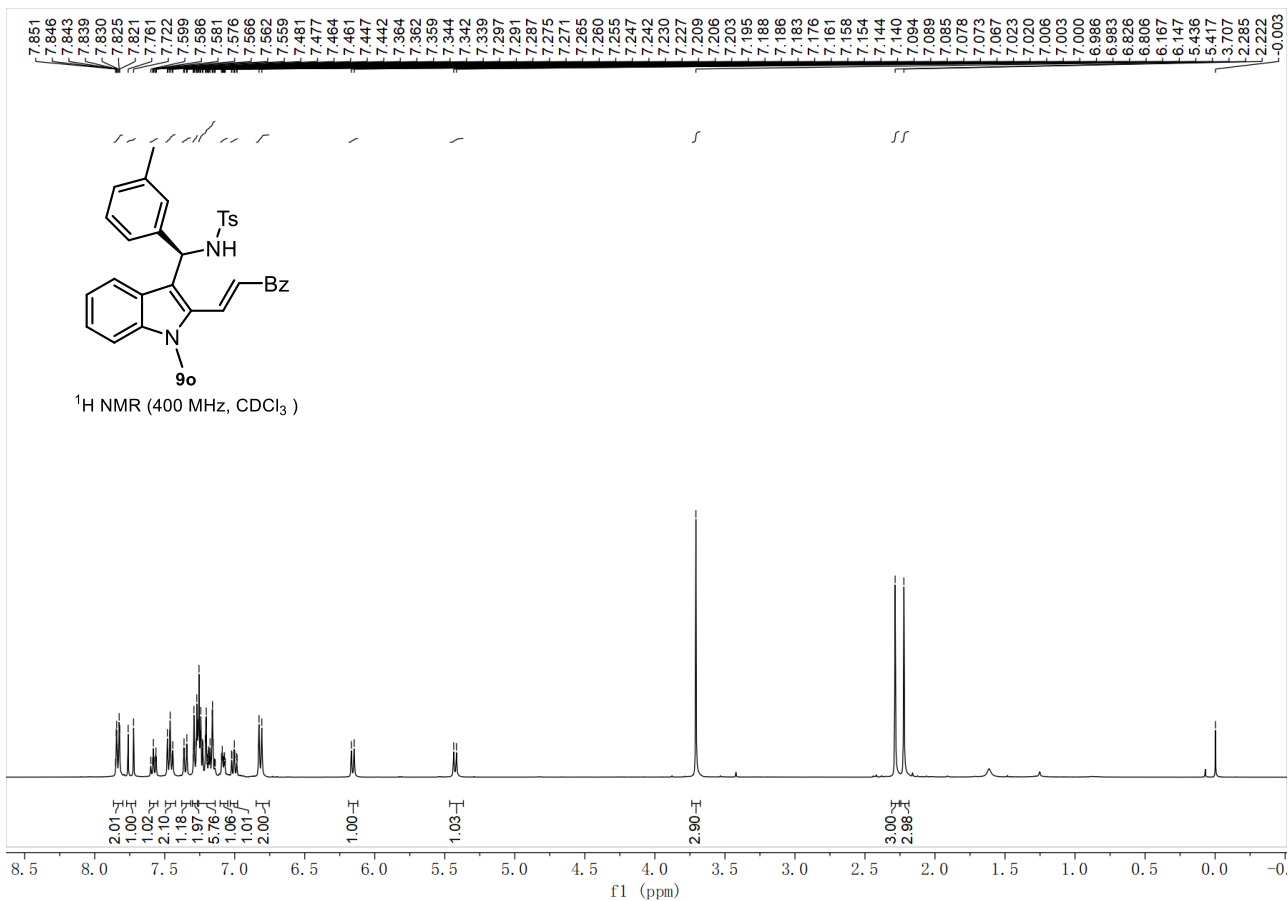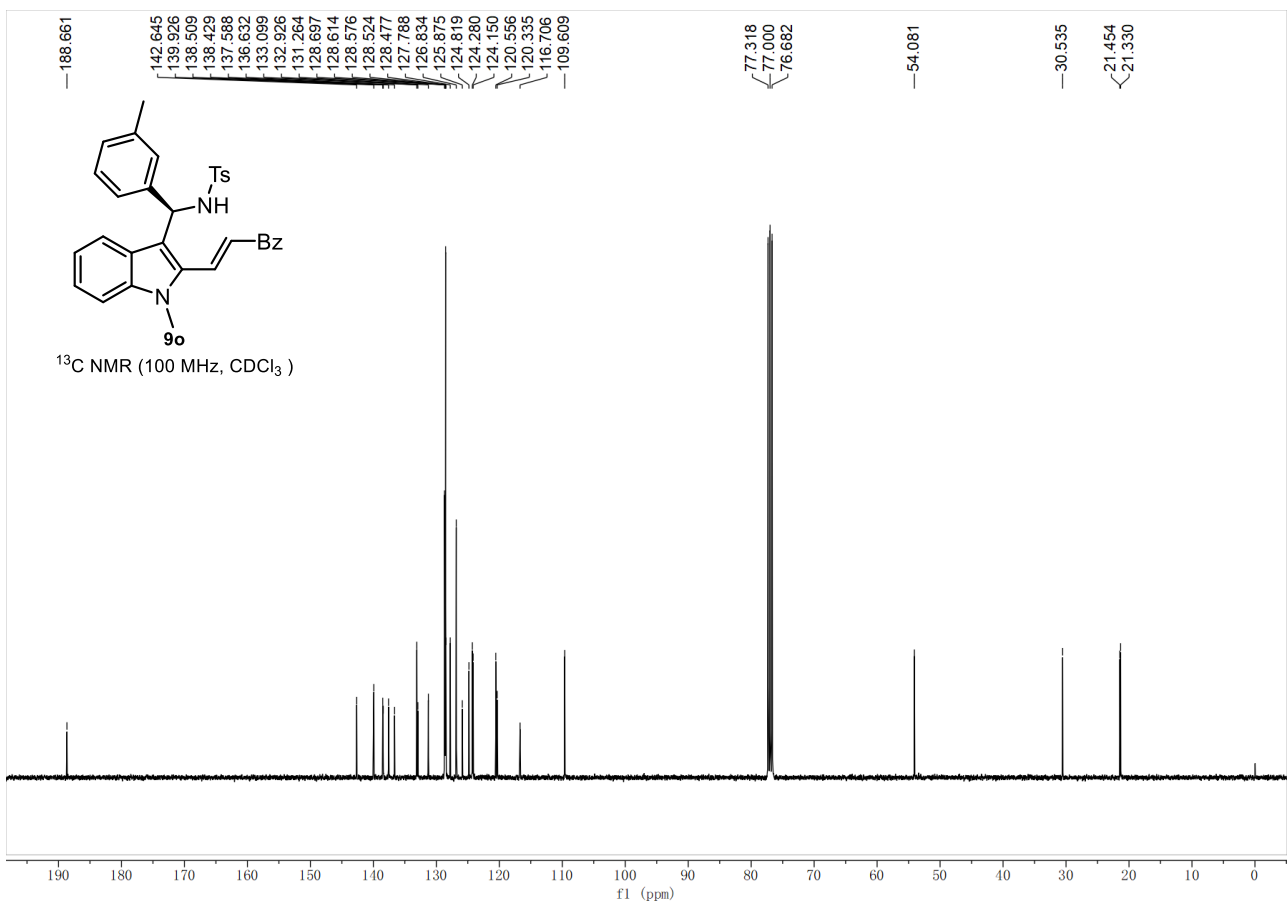

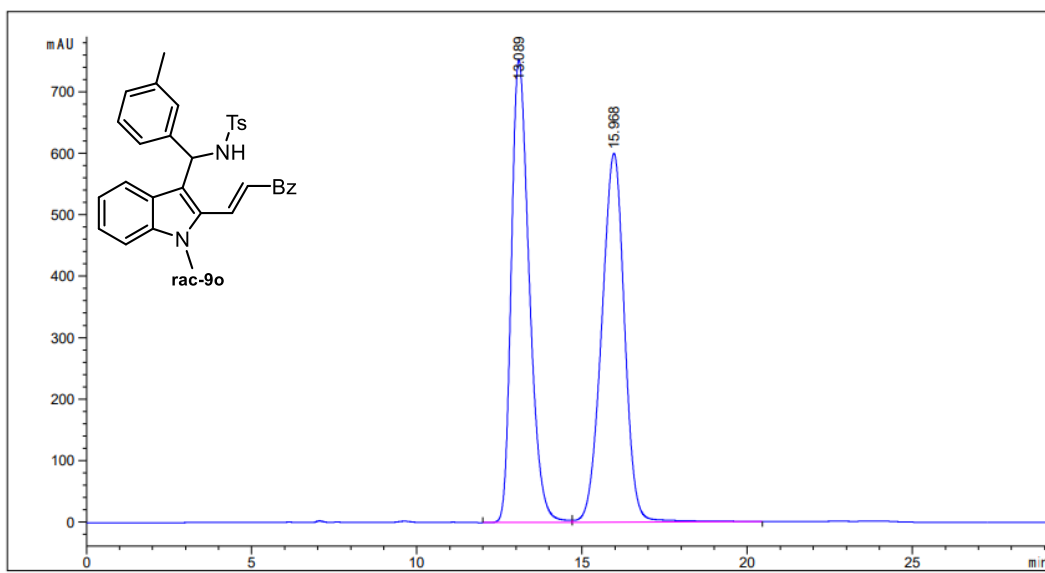

| # | [min]  | [min] | [mAU*s] | [mAU]     | %         |         |
|---|--------|-------|---------|-----------|-----------|---------|
| 1 | 13.089 | BV    | 0.5807  | 2.83891e4 | 753.72095 | 49.6213 |
| 2 | 15.968 | VB    | 0.7404  | 2.88224e4 | 600.61591 | 50.3787 |

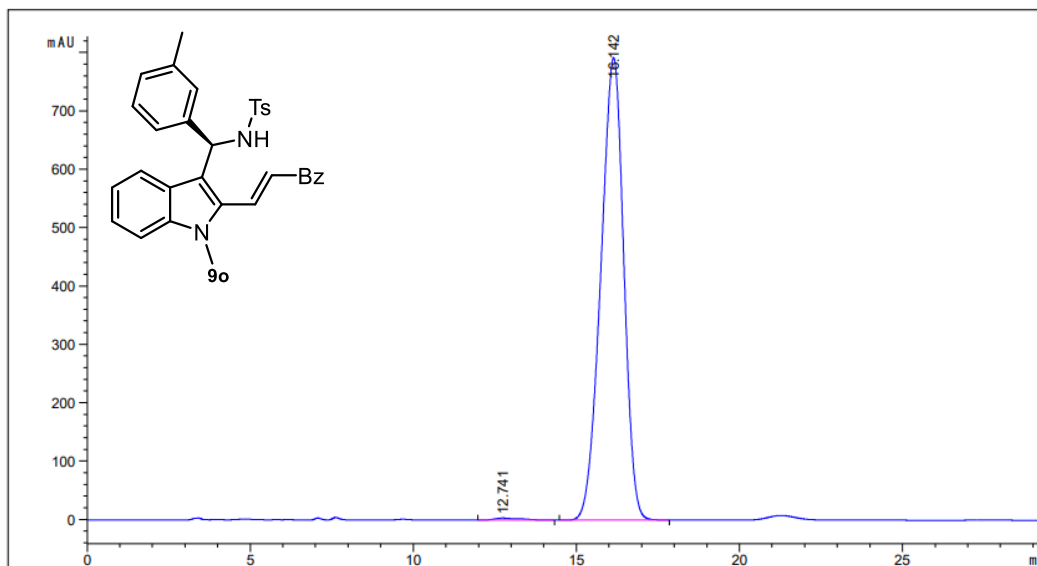

| # | [min]  | [min] | [mAU*s] | [mAU]     | %         |         |
|---|--------|-------|---------|-----------|-----------|---------|
| 1 | 12.741 | BB    | 0.7331  | 204.36742 | 3.63517   | 0.5264  |
| 2 | 16.142 | BB    | 0.7538  | 3.86200e4 | 792.07098 | 99.4736 |

Name: CYC-20211122-7      Rack Pos.:  
Inj. Vol. (ul): 8      Plate Pos.:  
Data File: CYC-20211122-7.d      Method (Acq): ZYJ-20201106.m      Instrument: ZYJ-20201106.m      Instrument 1: Success      Operator: Success  
Acq. Time (Local): 11/25/2021 4:44:08 PM (UTC+08:00)

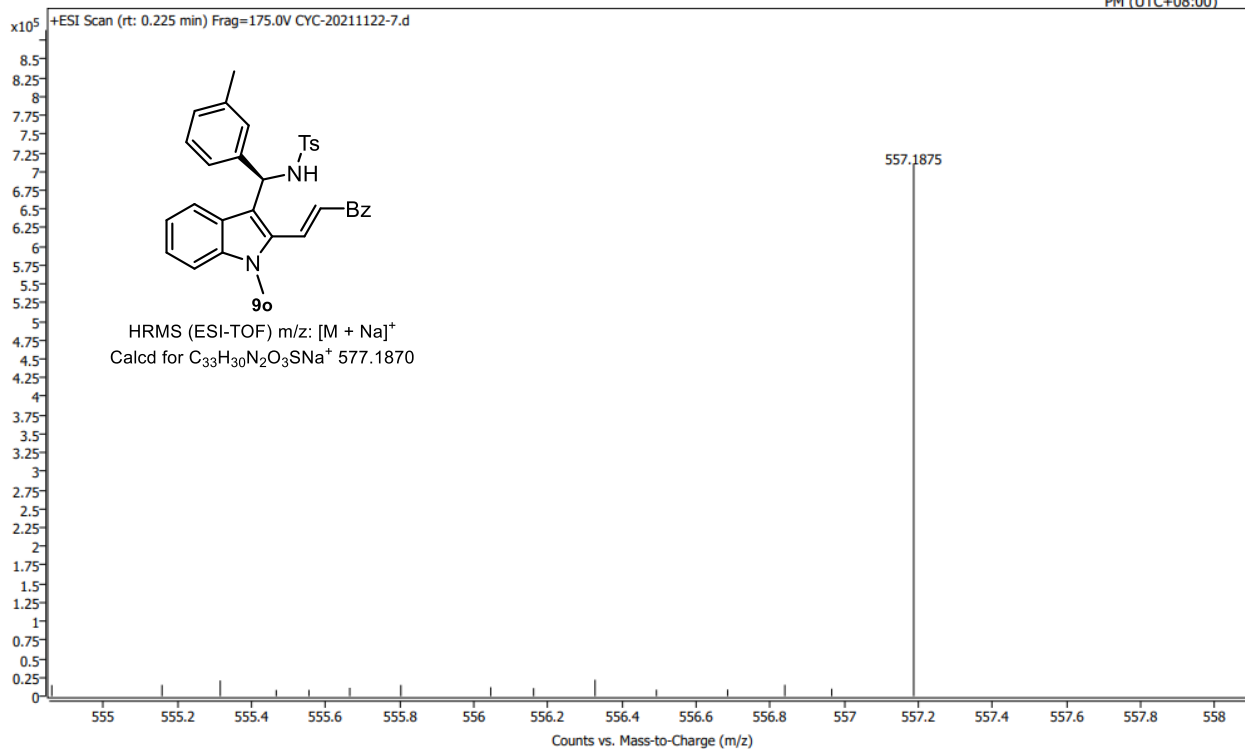

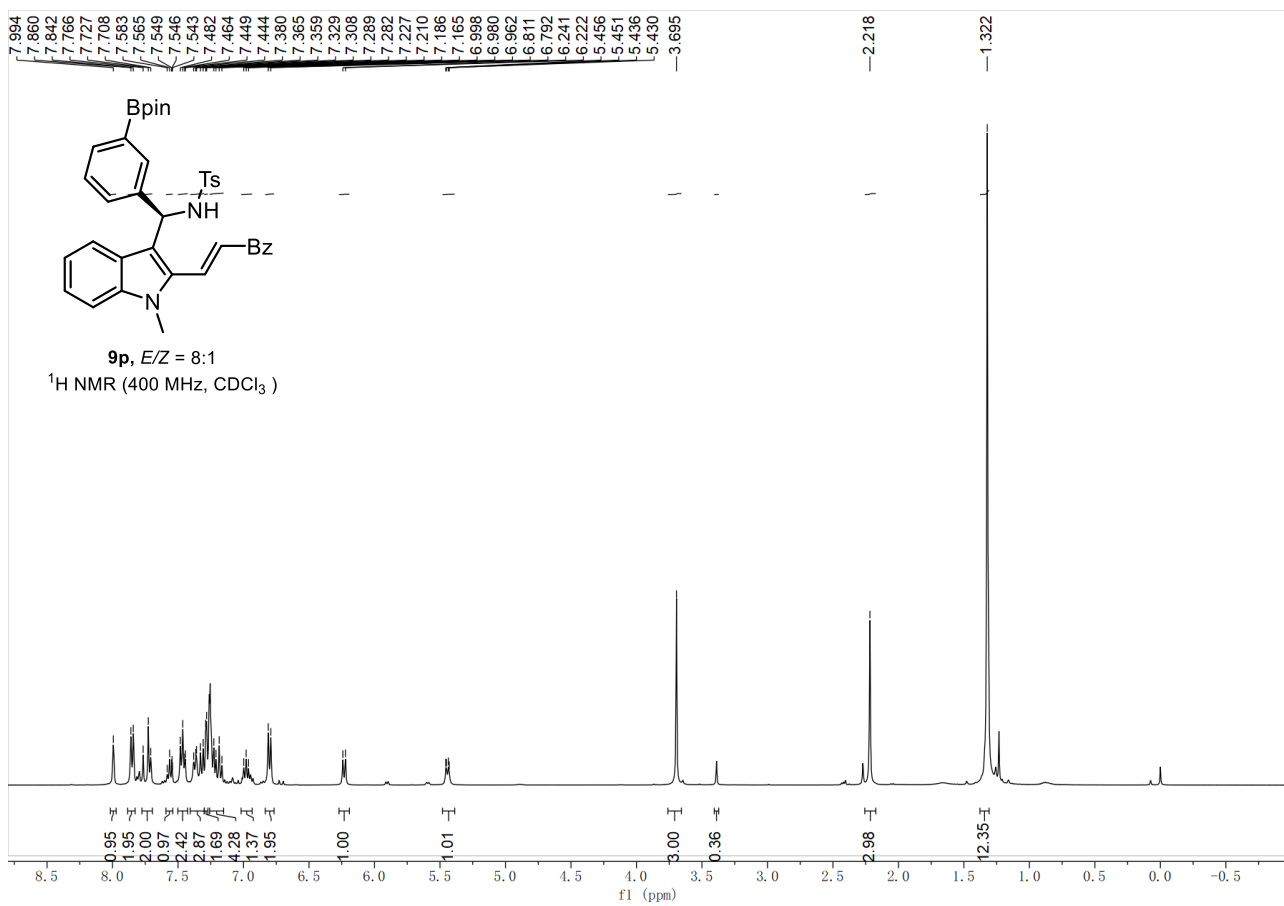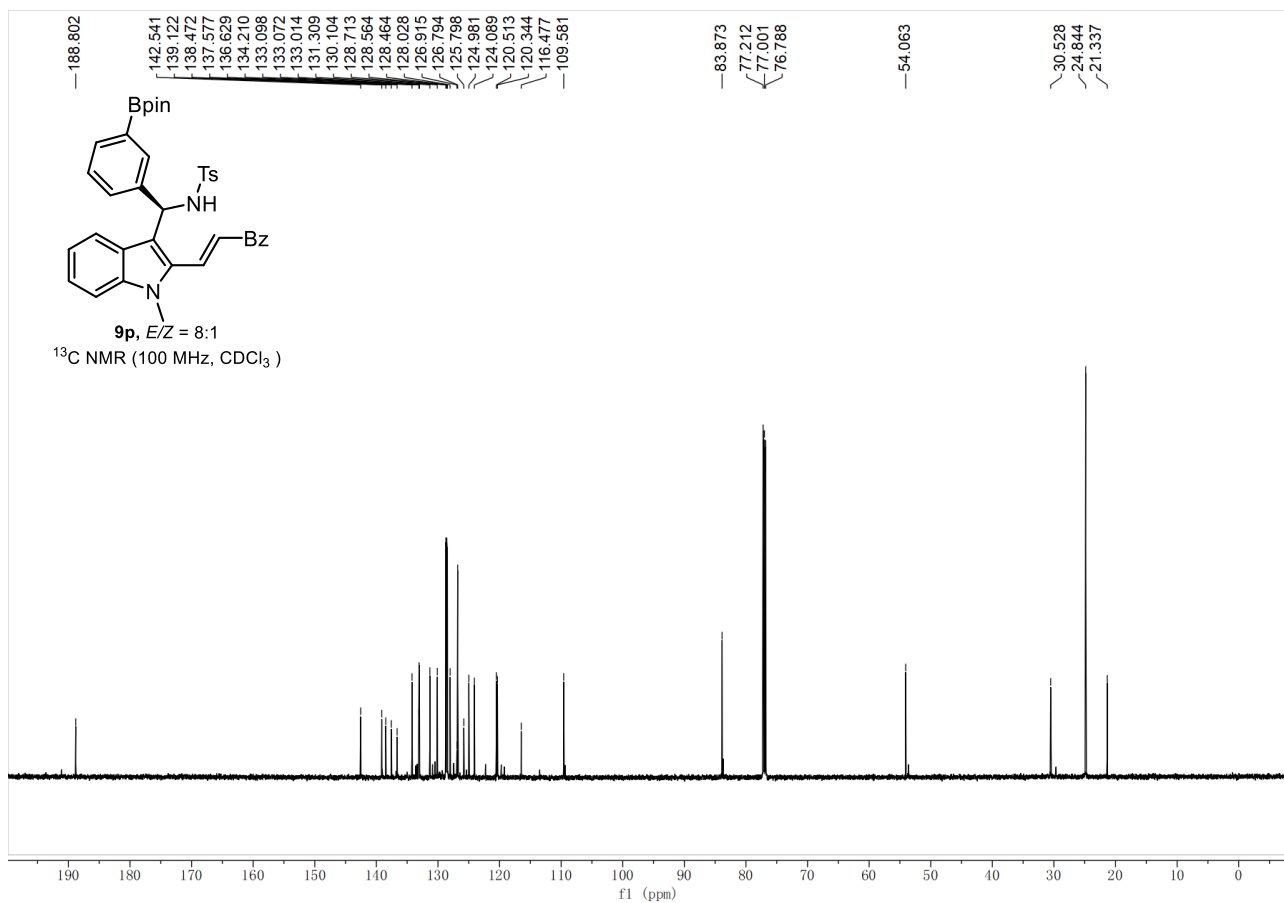

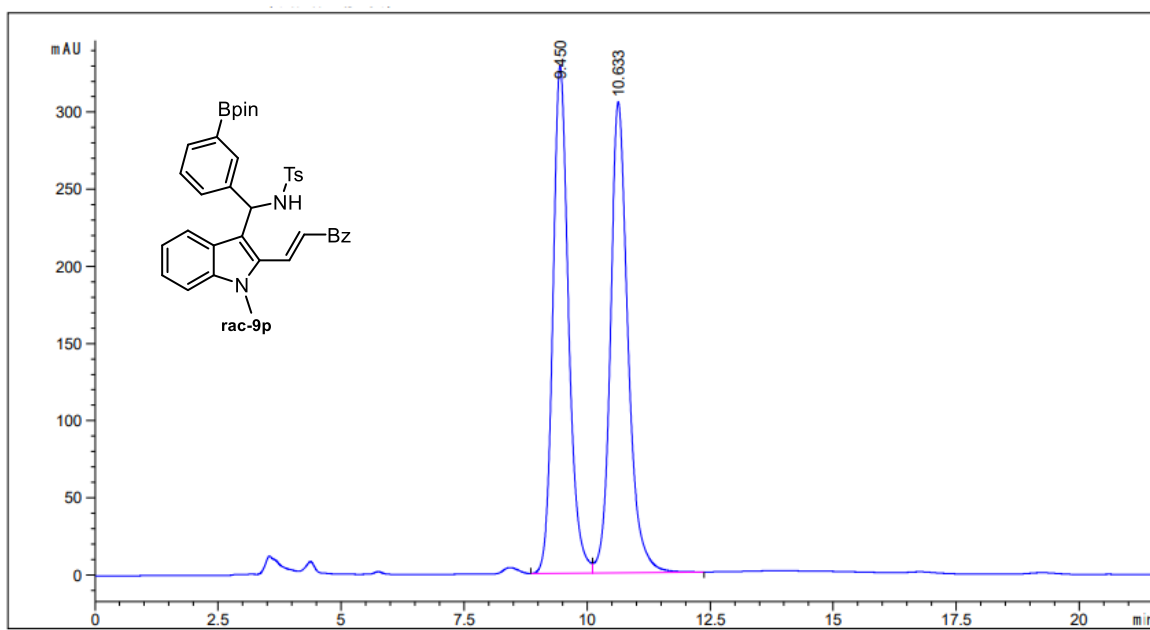

| # | [min]     | [min]  | [mAU*s]    | [mAU]     | %       |
|---|-----------|--------|------------|-----------|---------|
| 1 | 9.450 BV  | 0.3342 | 7248.03320 | 329.00491 | 48.9734 |
| 2 | 10.633 VB | 0.3731 | 7551.90332 | 305.28229 | 51.0266 |

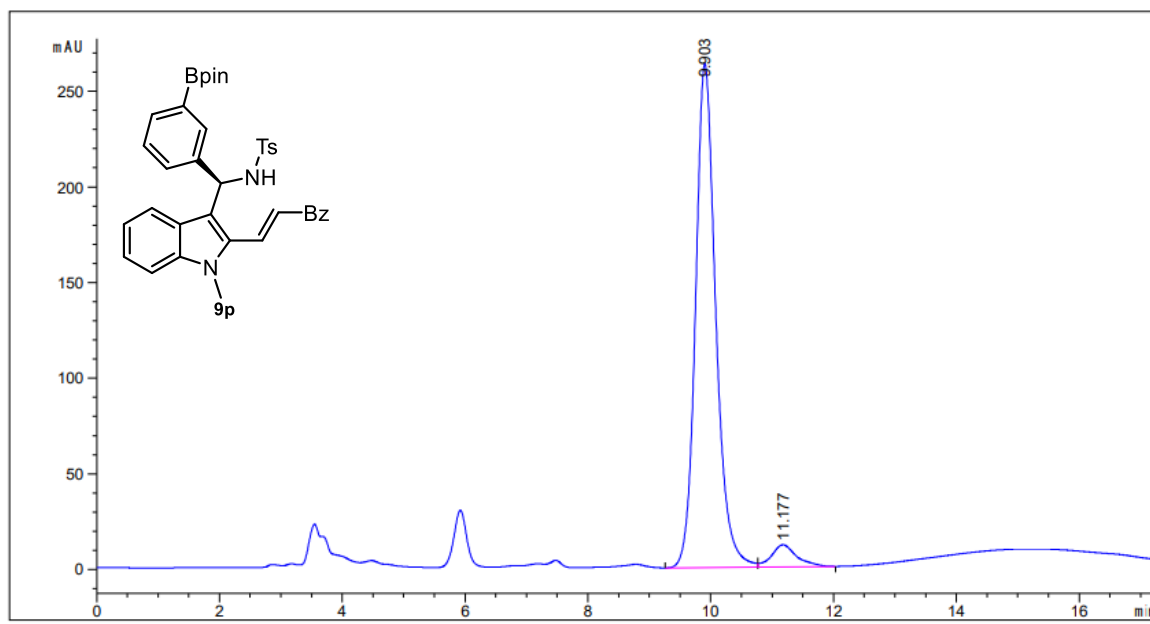

| # | [min]     | [min]  | [mAU*s]    | [mAU]     | %       |
|---|-----------|--------|------------|-----------|---------|
| 1 | 9.903 BV  | 0.3446 | 6006.89209 | 263.43942 | 94.7943 |
| 2 | 11.177 VB | 0.4205 | 329.87622  | 11.55410  | 5.2057  |

Name  
Inj. Vol. (ul)  
Data File

CYC-20211122-23  
8  
CYC-20211122-23.d

Rack Pos.  
Plate Pos.  
Method (Acq)

ZYJ-20201106.m

Instrument  
IRM Status  
Comment

Instrument 1  
Success

Operator

Acq. Time (Local)

11/25/2021 5:31:41  
PM (UTC+08:00)

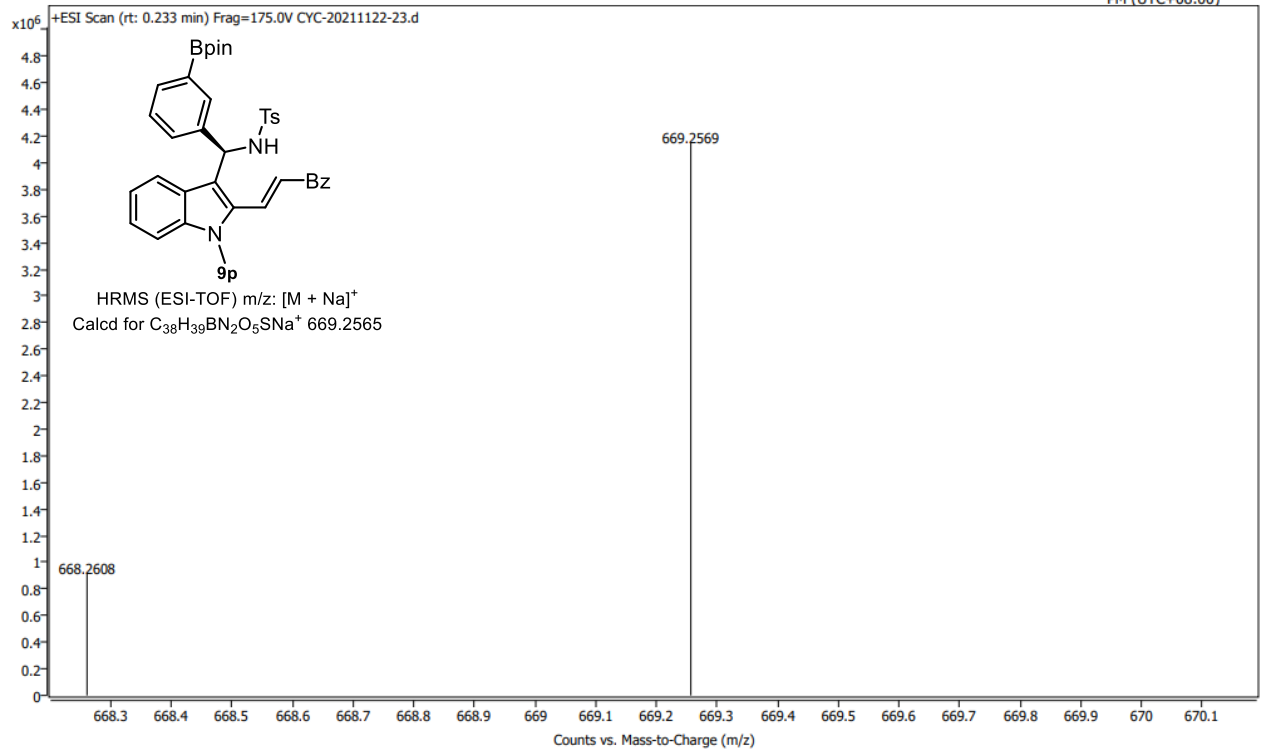



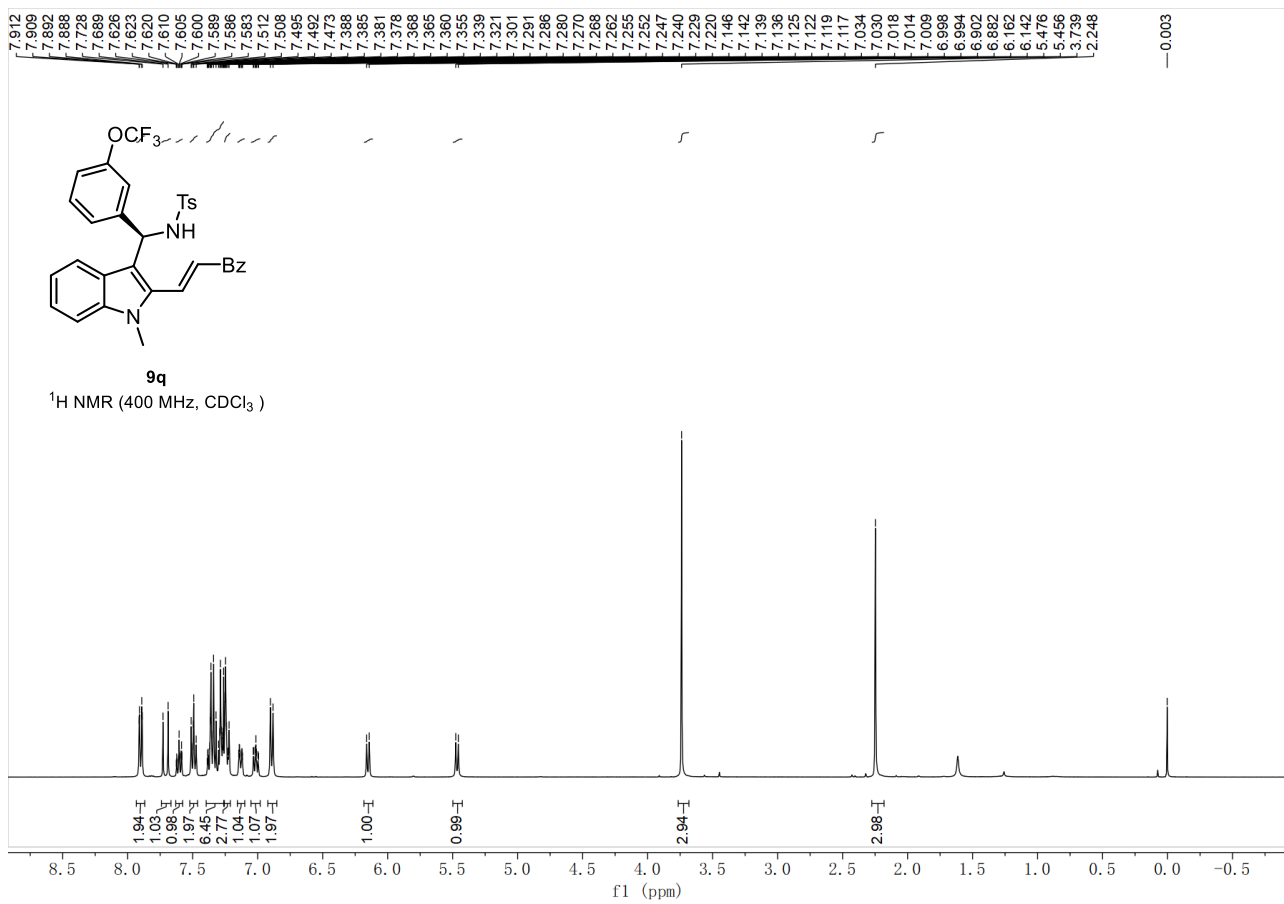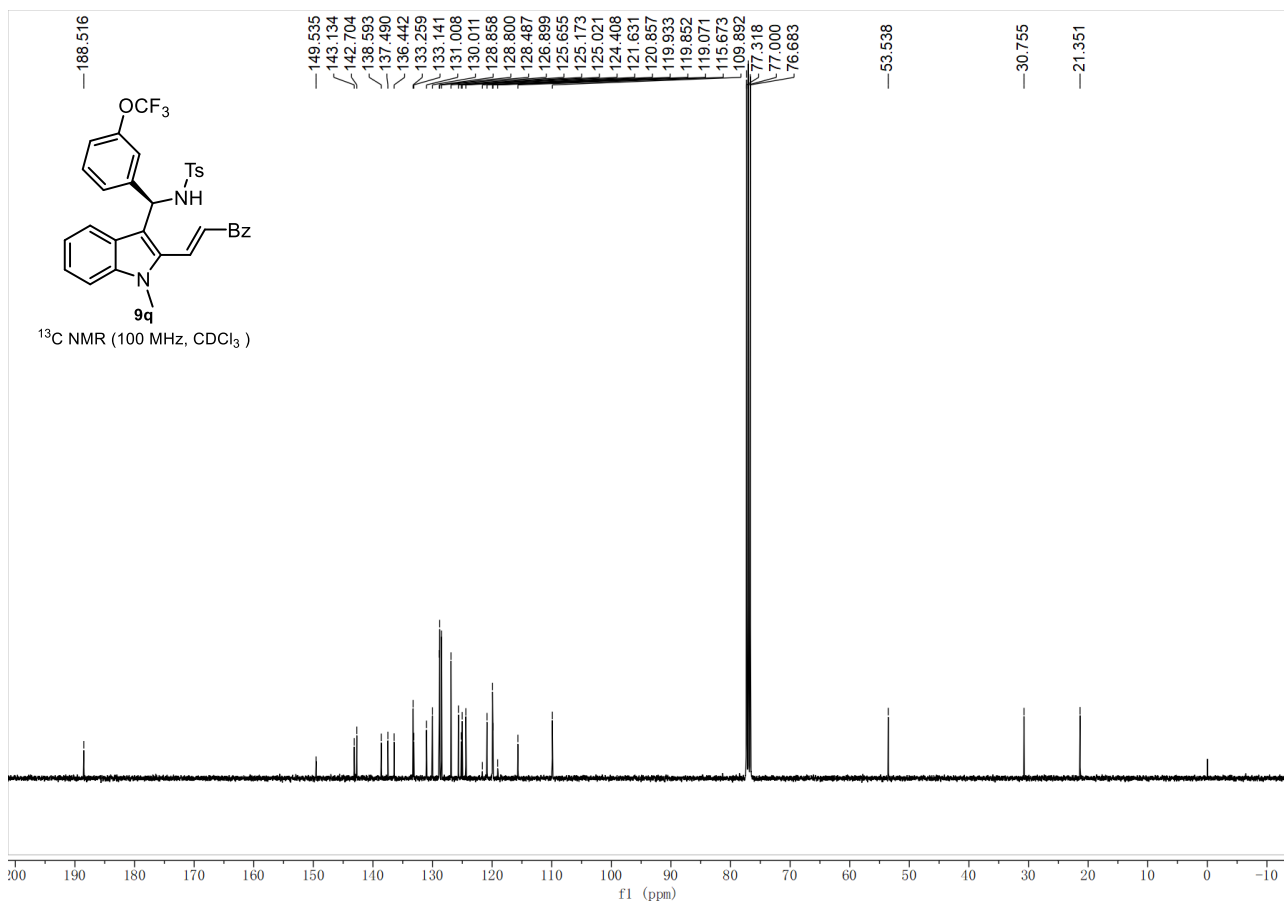

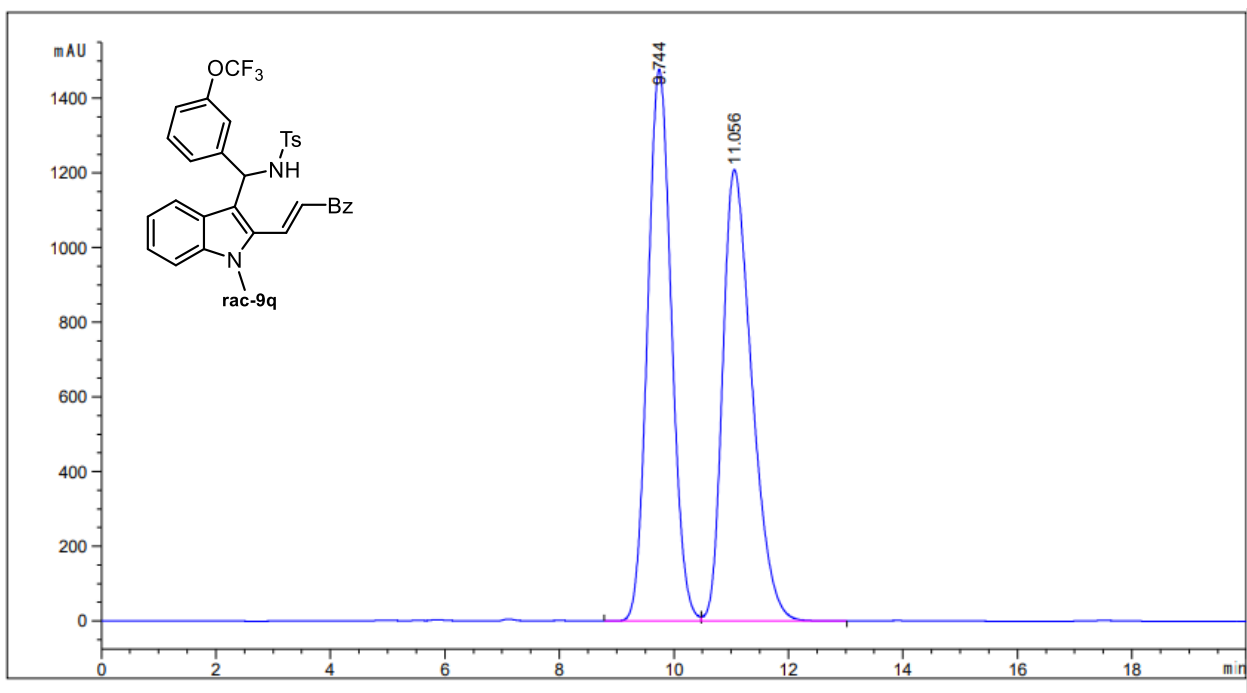

| # | [min]  | [min] | [mAU*s] | [mAU]     | %          |         |
|---|--------|-------|---------|-----------|------------|---------|
| 1 | 9.744  | BV    | 0.4509  | 4.27206e4 | 1477.50684 | 49.9751 |
| 2 | 11.056 | VBA   | 0.5437  | 4.27632e4 | 1208.91479 | 50.0249 |

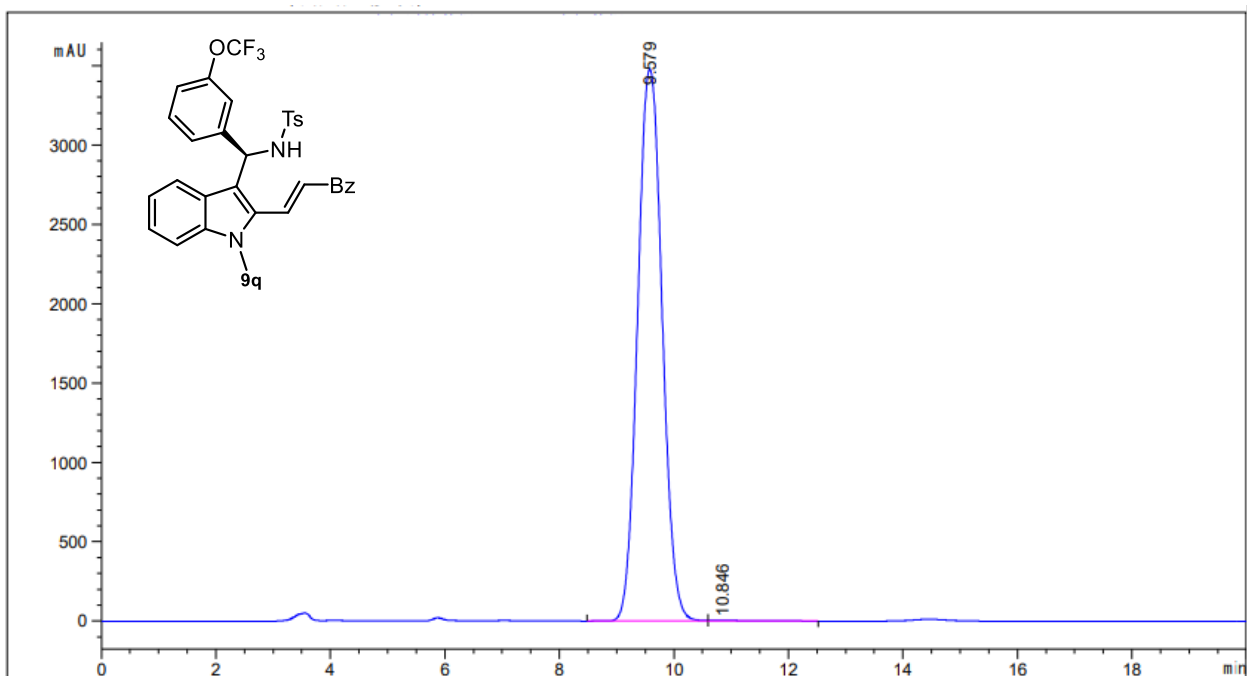

| # | [min]  | [min] | [mAU*s] | [mAU]     | %          |         |
|---|--------|-------|---------|-----------|------------|---------|
| 1 | 9.579  | BV    | 0.4667  | 1.03429e5 | 3474.81714 | 99.8132 |
| 2 | 10.846 | VB    | 0.5508  | 193.61464 | 5.04878    | 0.1868  |

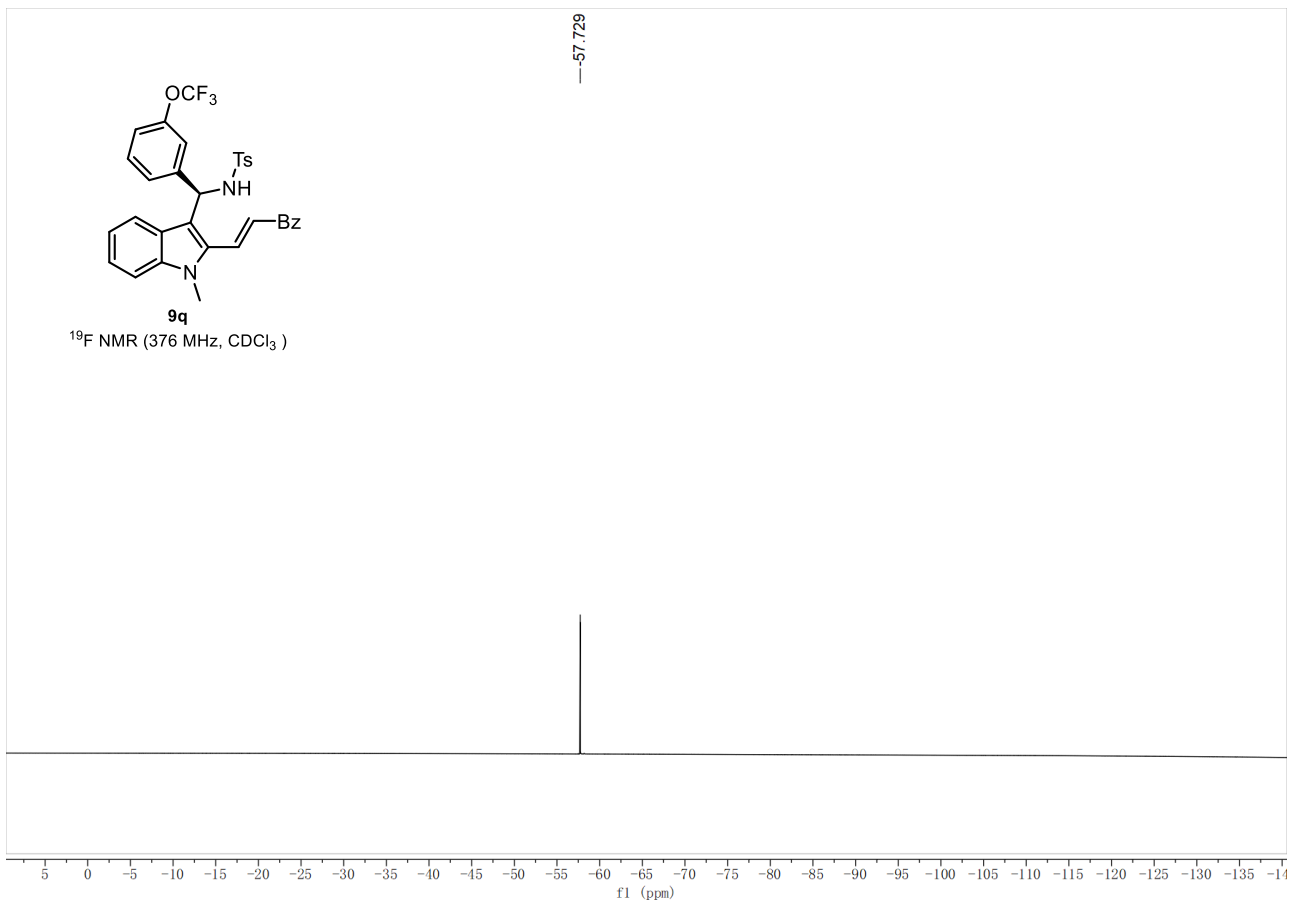

| Name           | CYC-20211122-5   | Rack Pos.    | Instrument     | Instrument 1 | Operator                                            |
|----------------|------------------|--------------|----------------|--------------|-----------------------------------------------------|
| Inj. Vol. (ul) | 8                | Plate Pos.   | IRM Status     | Success      |                                                     |
| Data File      | CYC-20211122-5.d | Method (Acq) | ZYJ-20201106.m | Comment      | Acq. Time (Local) 11/25/2021 4:21:22 PM (UTC+08:00) |

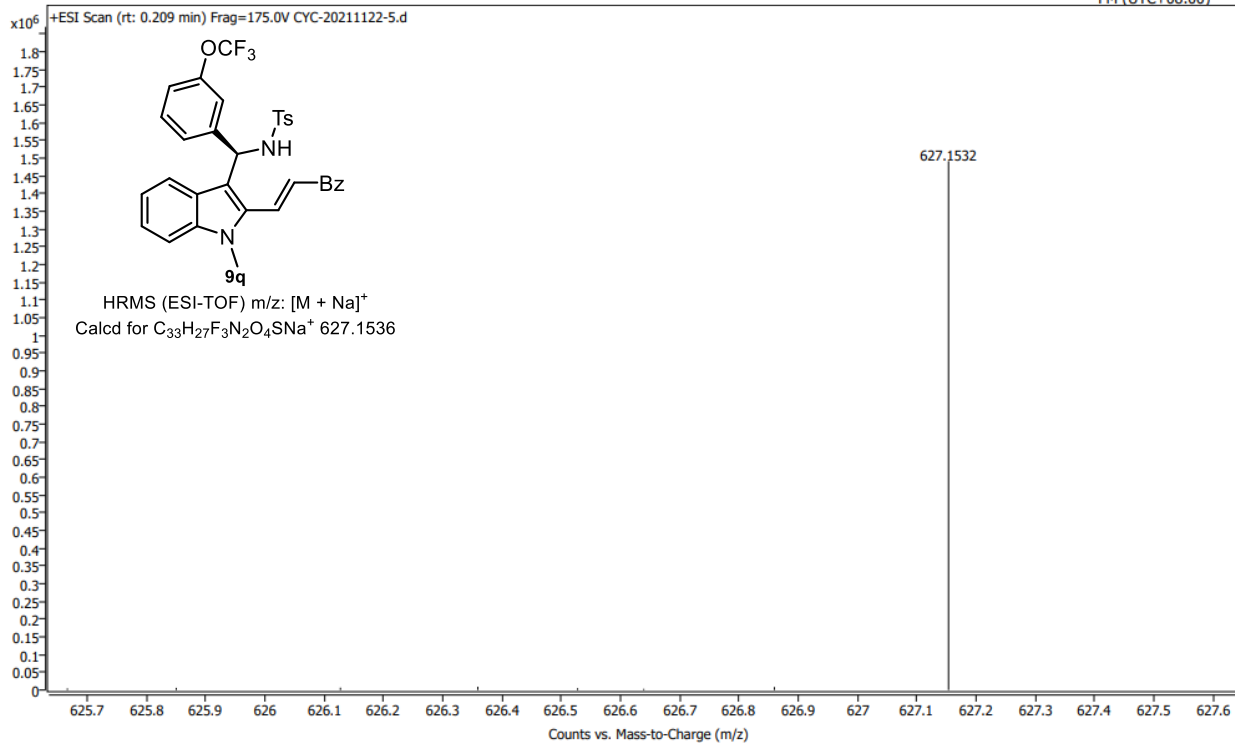

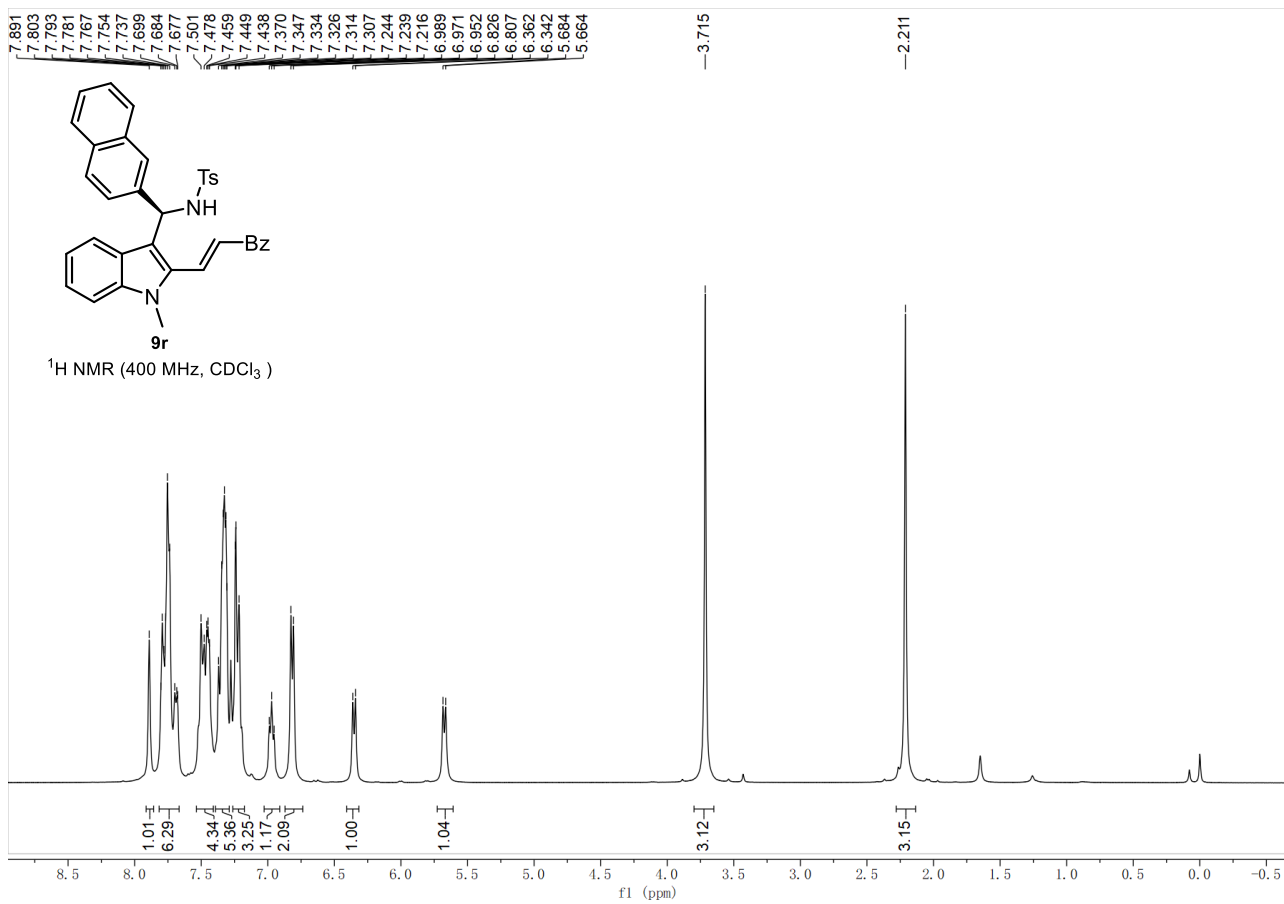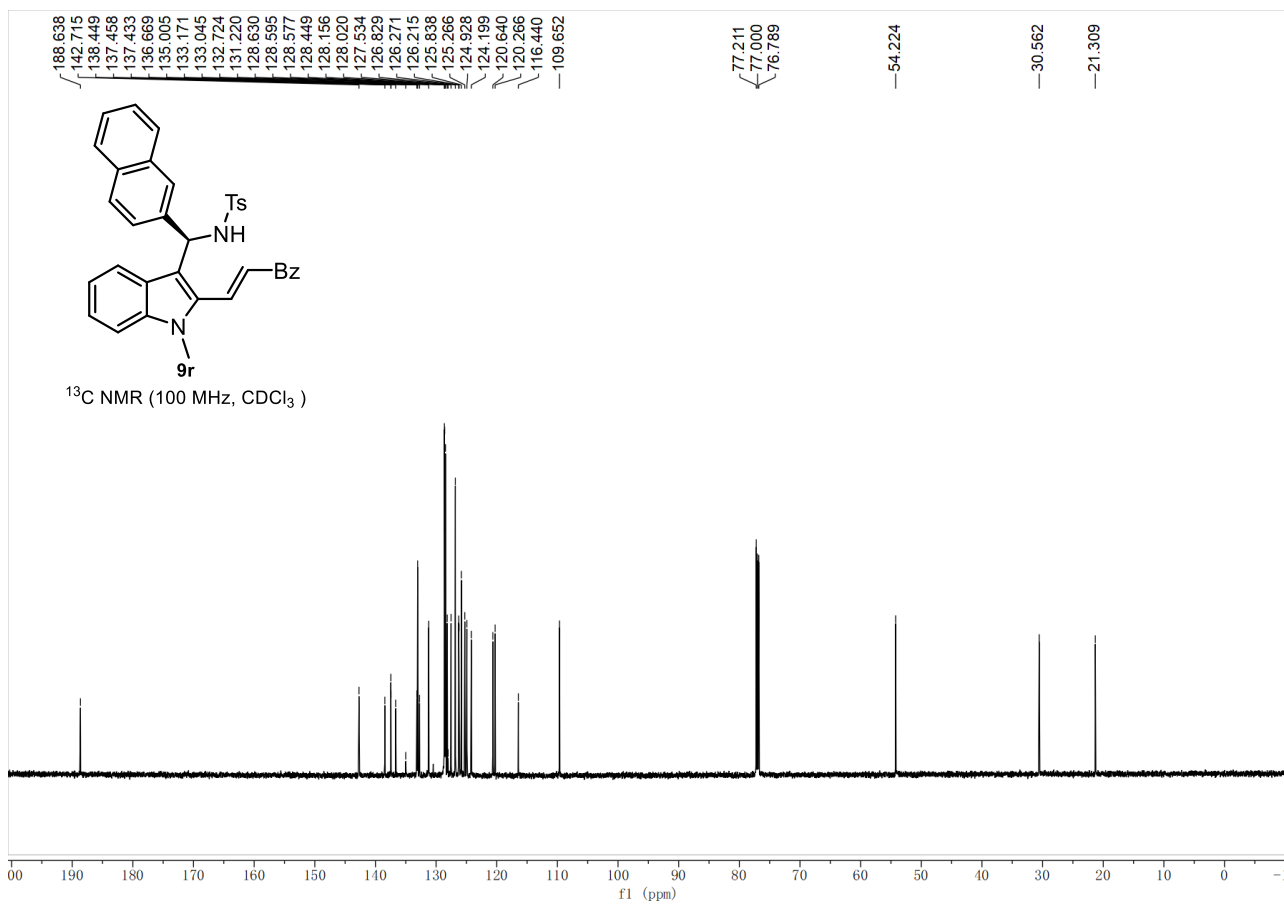

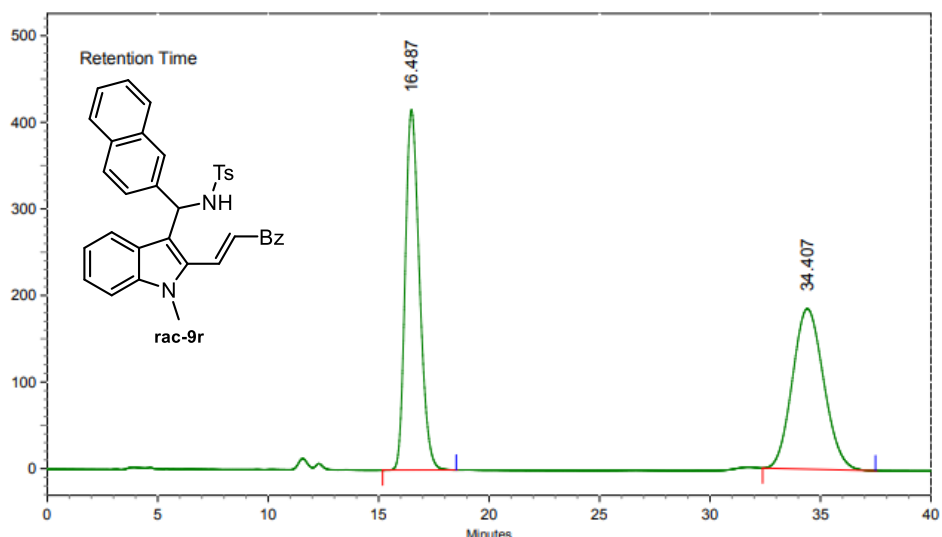

### AREA PERCENT REPORT

| Peak No. | Ret Time | Width | Height  | Area      | Area [%] |
|----------|----------|-------|---------|-----------|----------|
| 1        | 16.487   | 3.333 | 6979236 | 312816302 | 50.5441  |
| 2        | 34.407   | 5.113 | 3108400 | 306080935 | 49.4559  |

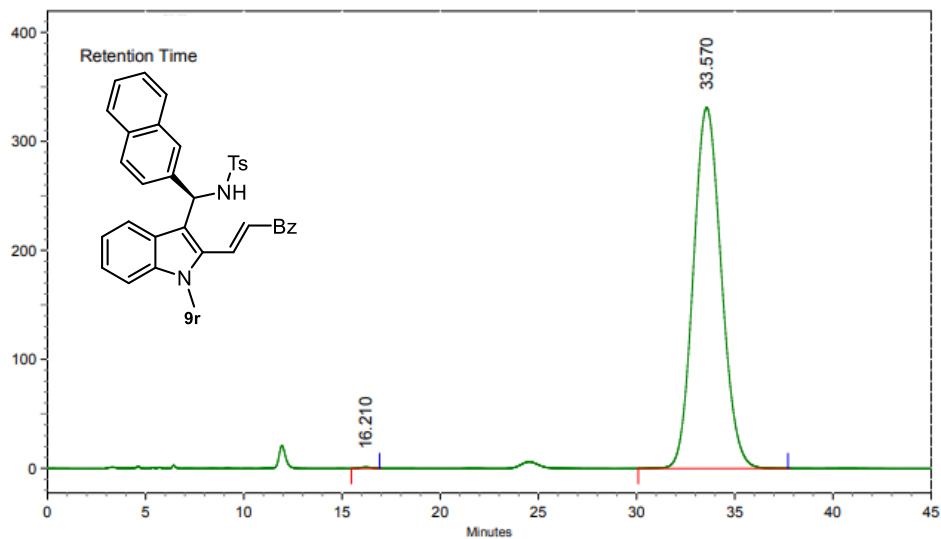

### AREA PERCENT REPORT

| Peak No. | Ret Time | Width | Height  | Area      | Area [%] |
|----------|----------|-------|---------|-----------|----------|
| 1        | 16.210   | 1.440 | 20984   | 850281    | 0.1545   |
| 2        | 33.570   | 7.627 | 5557583 | 549577262 | 99.8455  |

| Name           | CYC-20211122-8   | Rack Pos.    | Instrument     | Instrument 1 | Operator                                            |
|----------------|------------------|--------------|----------------|--------------|-----------------------------------------------------|
| Inj. Vol. (ul) | 8                | Plate Pos.   | IRM Status     | Success      |                                                     |
| Data File      | CYC-20211122-8.d | Method (Acq) | ZYJ-20201106.m | Comment      | Acq. Time (Local) 11/25/2021 4:47:23 PM (UTC+08:00) |

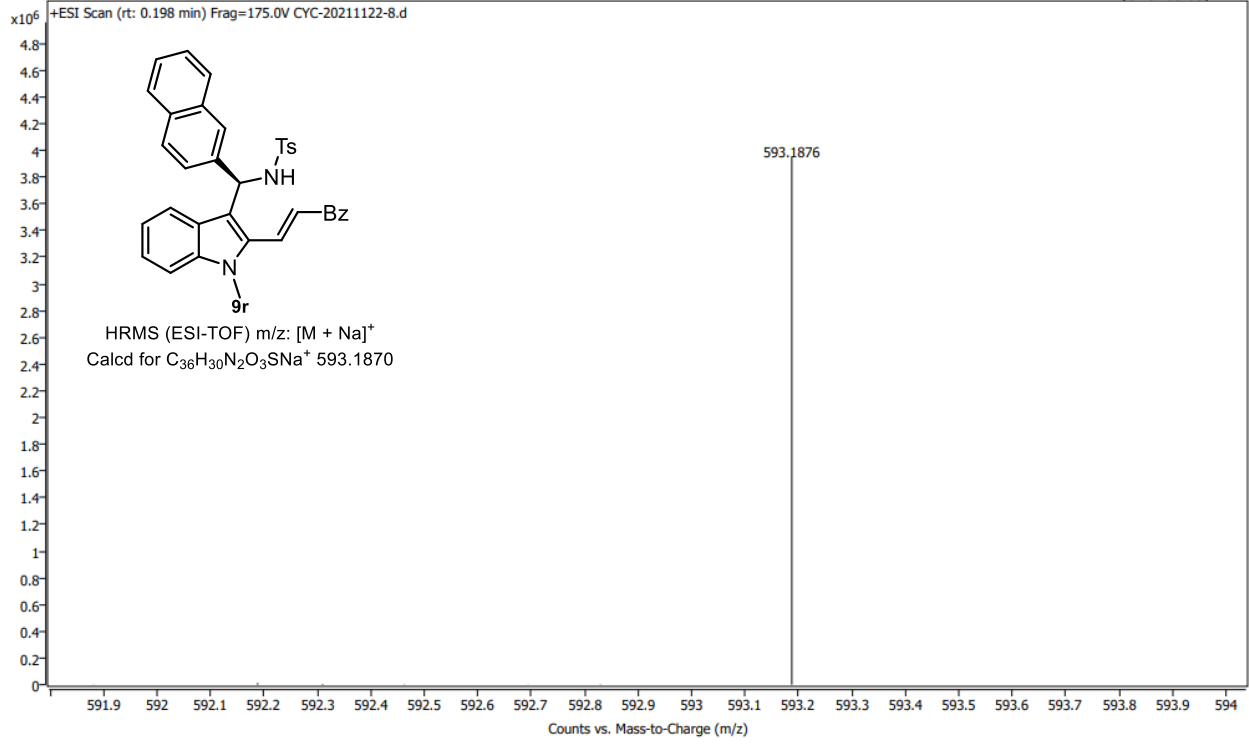

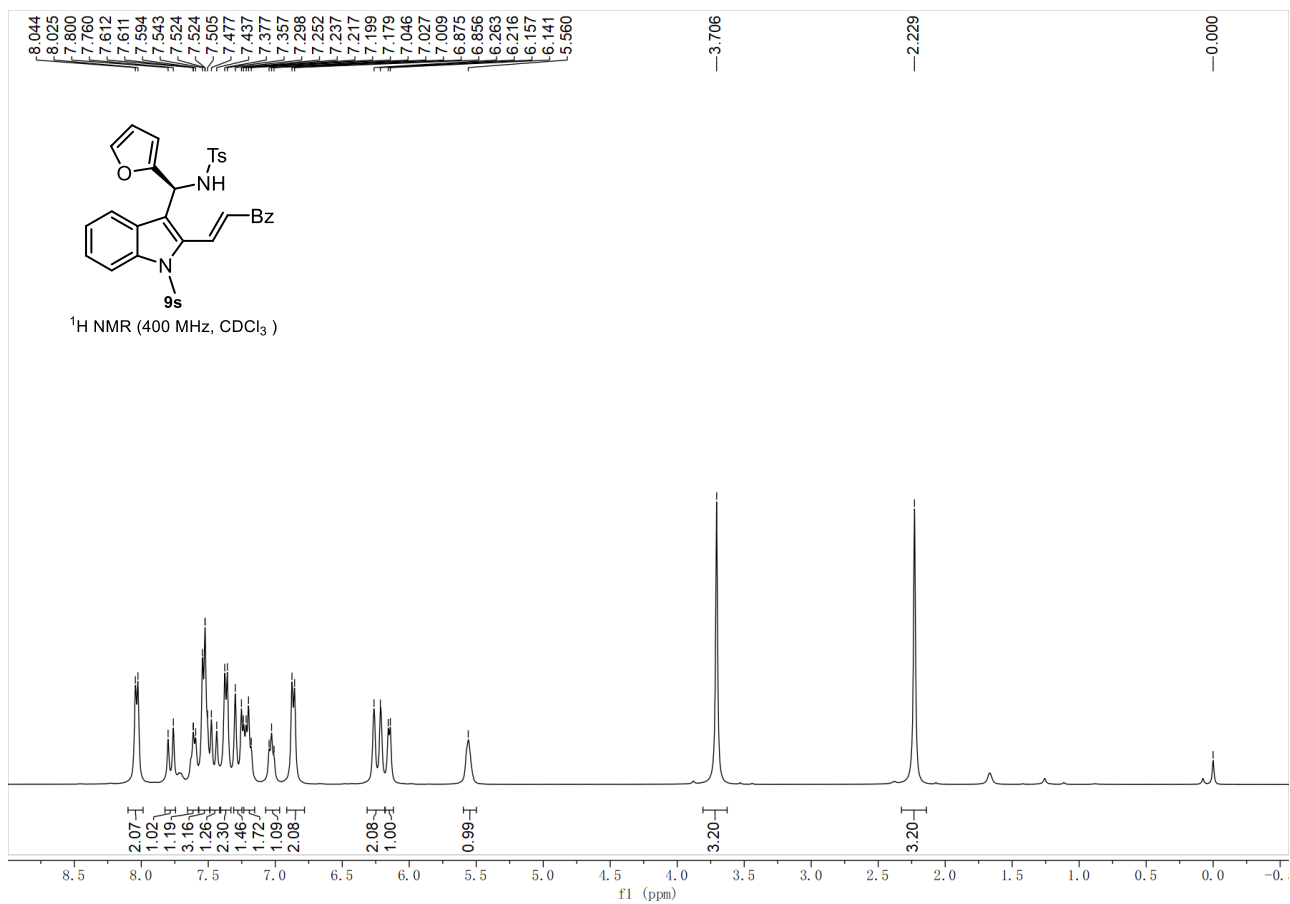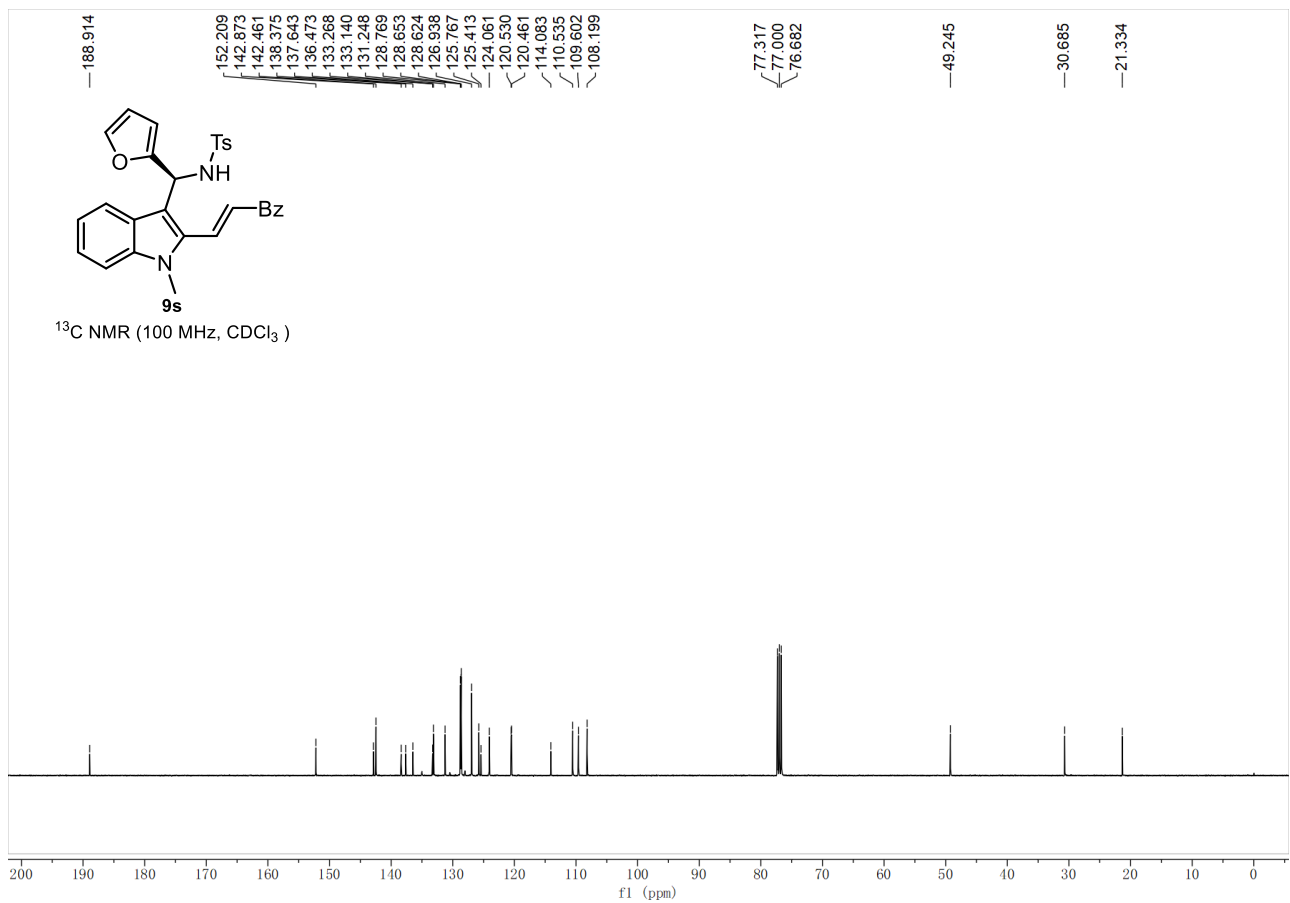

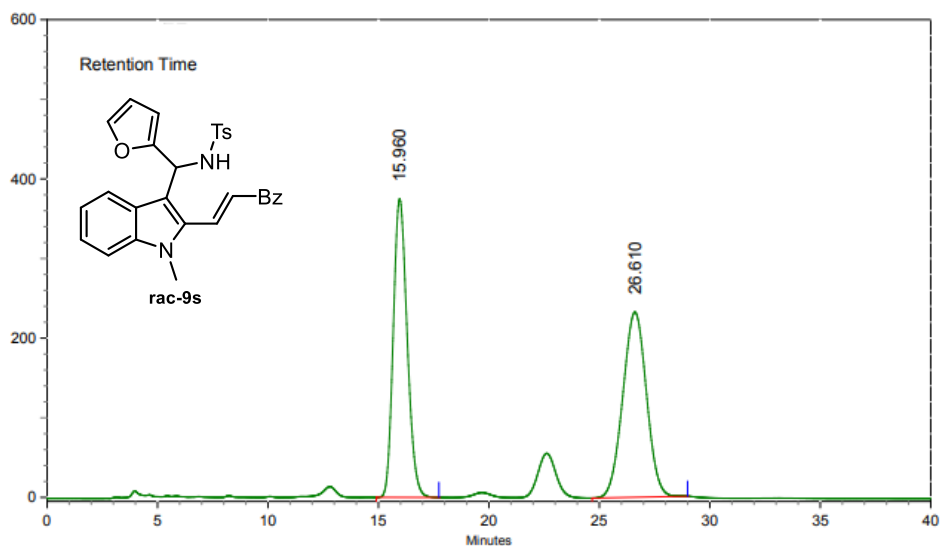

AREA PERCENT REPORT

| Peak No. | Ret Time | Width | Height  | Area      | Area [%] |
|----------|----------|-------|---------|-----------|----------|
| 1        | 15.960   | 2.837 | 6290548 | 274844169 | 48.5817  |
| 2        | 26.610   | 4.320 | 3902253 | 290892002 | 51.4183  |

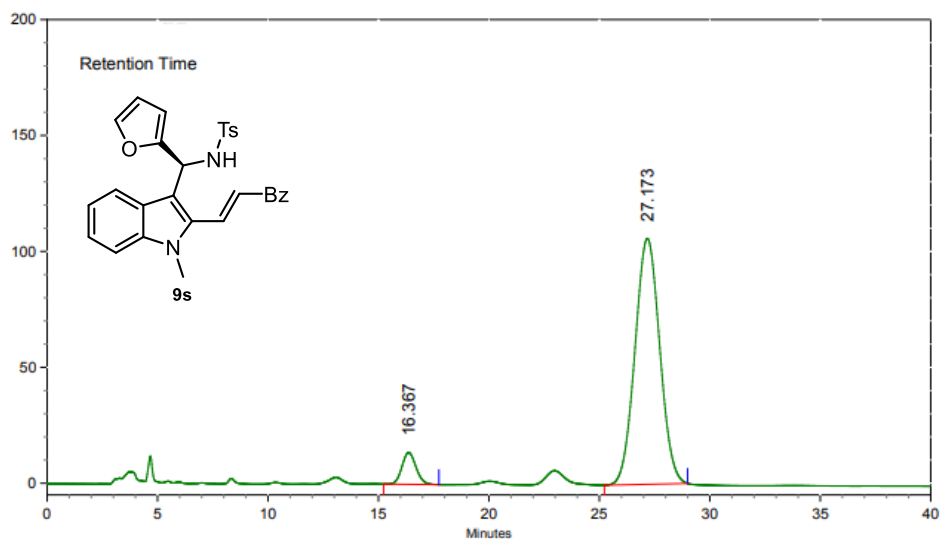

AREA PERCENT REPORT

| Peak No. | Ret Time | Width | Height  | Area      | Area [%] |
|----------|----------|-------|---------|-----------|----------|
| 1        | 16.367   | 2.507 | 230225  | 10180317  | 6.8558   |
| 2        | 27.173   | 3.767 | 1779123 | 138311245 | 93.1442  |



|                |                  |              |                |            |              |                                   |
|----------------|------------------|--------------|----------------|------------|--------------|-----------------------------------|
| Name           | CYC-20211122-9   | Rack Pos.    |                | Instrument | Instrument 1 | Operator                          |
| Inj. Vol. (ul) | 8                | Plate Pos.   |                | IRM Status | Success      |                                   |
| Data File      | CYC-20211122-9.d | Method (Acq) | ZYJ-20201106.m | Comment    |              | Acq. Time (Local)                 |
|                |                  |              |                |            |              | 11/25/2021 4:50:22 PM (UTC+08:00) |

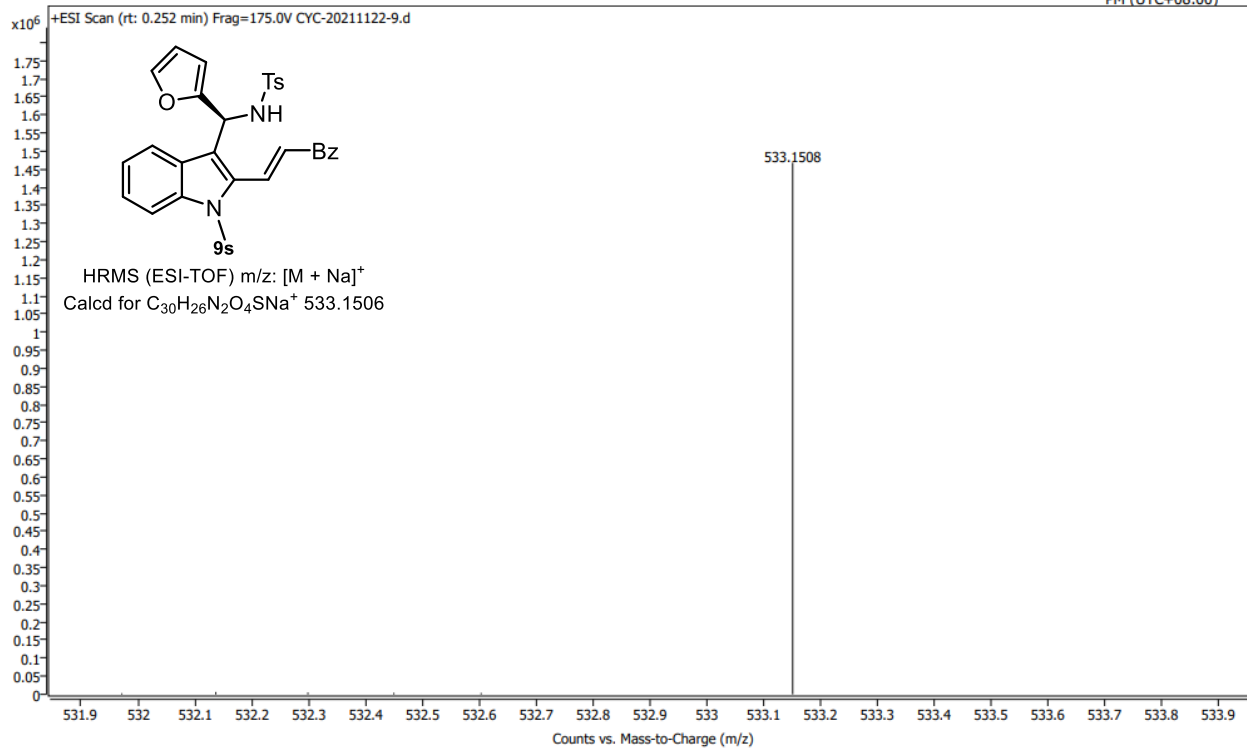

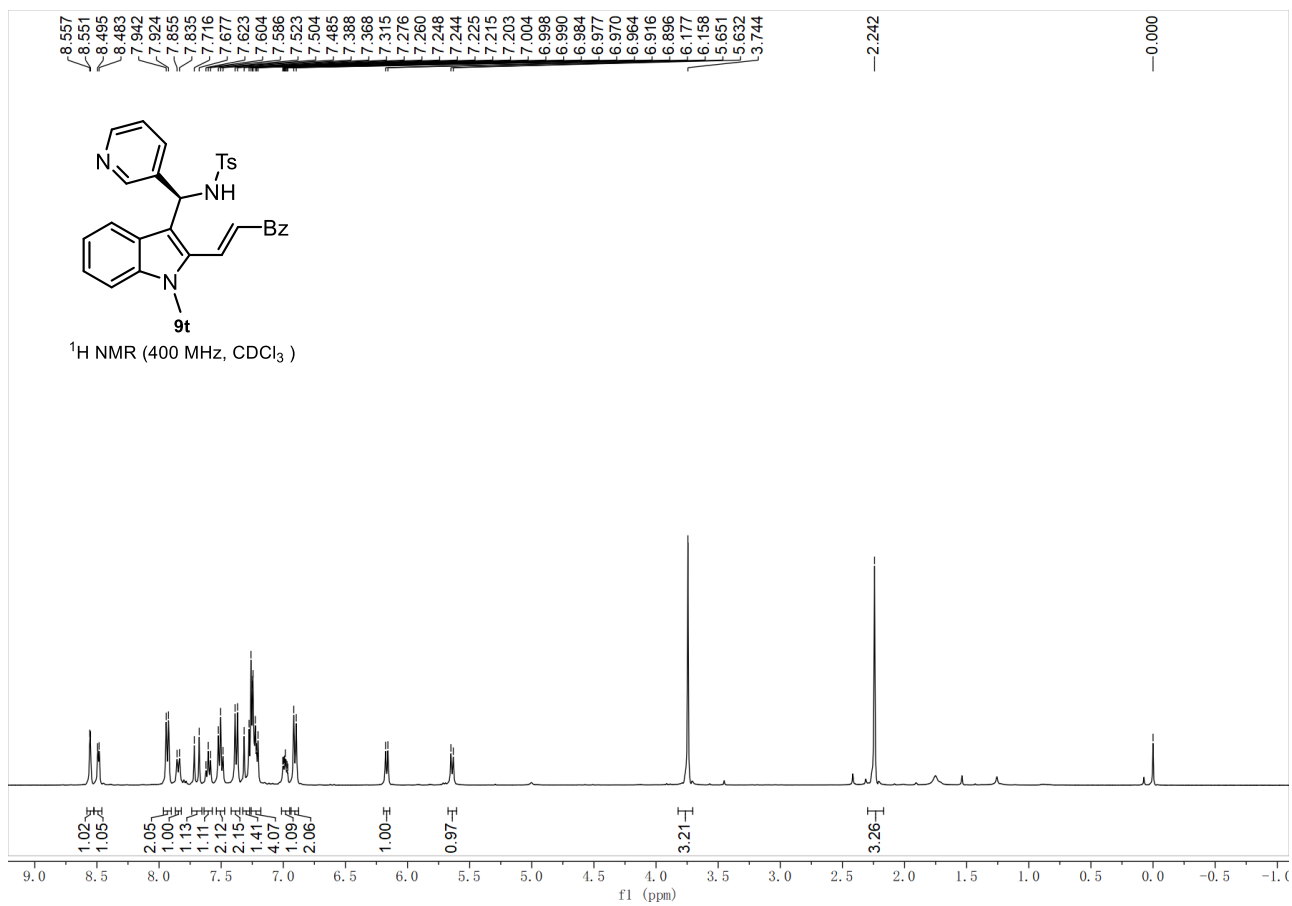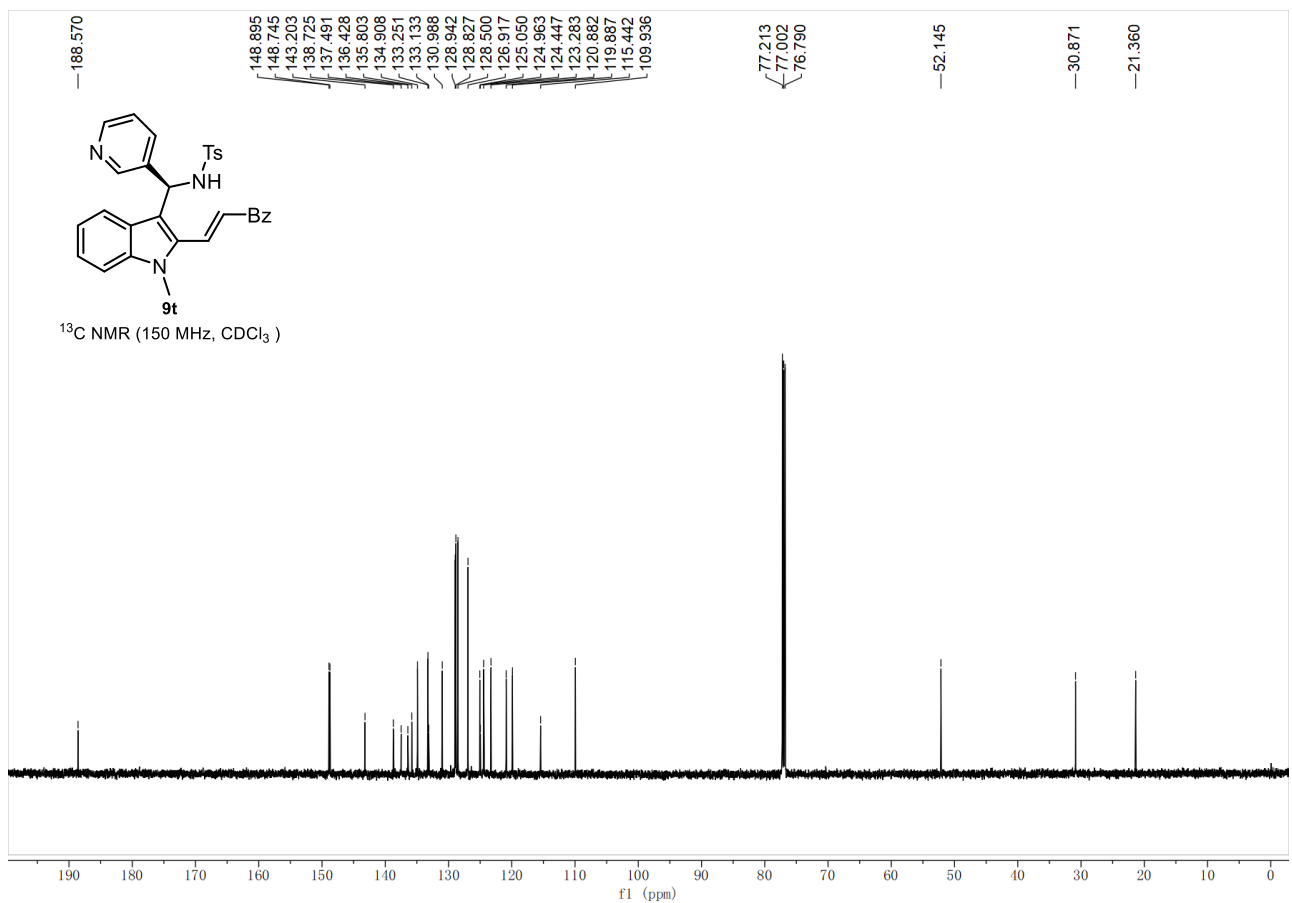

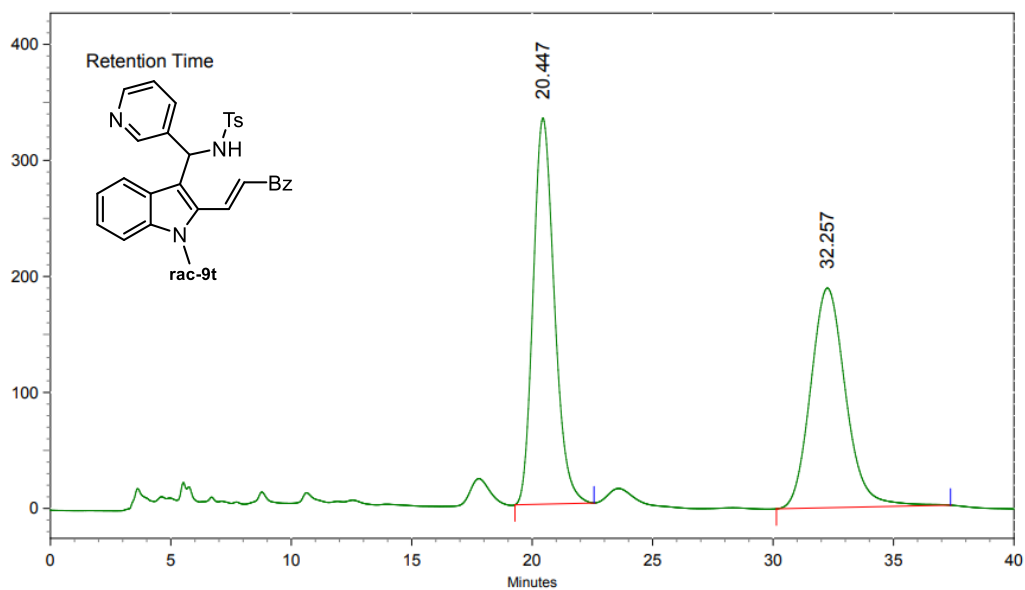

### AREA PERCENT REPORT

| Peak No. | Ret Time | Width | Height  | Area      | Area [%] |
|----------|----------|-------|---------|-----------|----------|
| 1        | 20.447   | 3.280 | 5582775 | 340881714 | 51.4650  |
| 2        | 32.257   | 7.227 | 3177083 | 321474059 | 48.5350  |

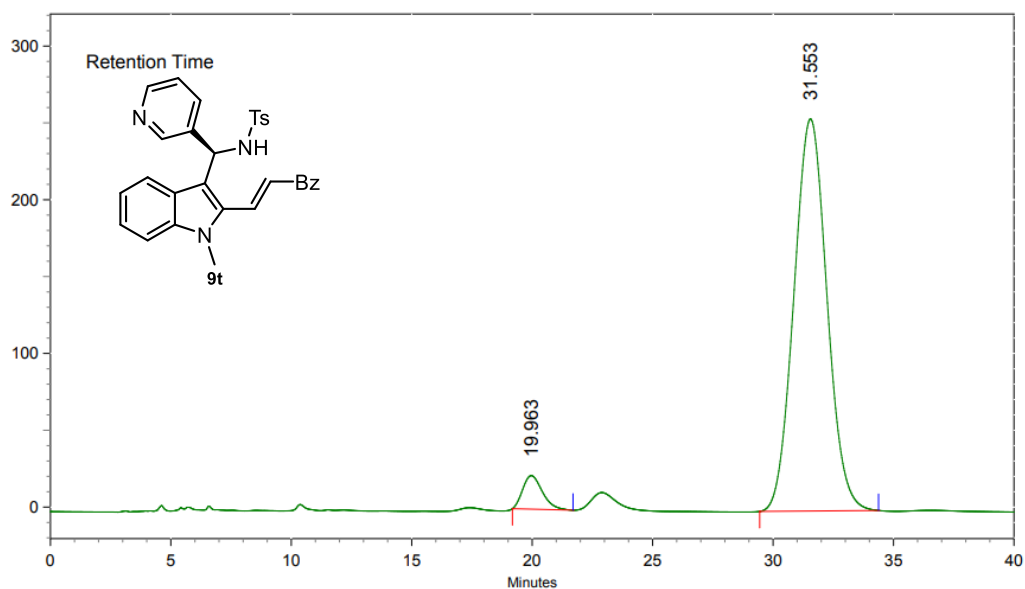

### AREA PERCENT REPORT

| Peak No. | Ret Time | Width | Height  | Area      | Area [%] |
|----------|----------|-------|---------|-----------|----------|
| 1        | 19.963   | 2.517 | 366335  | 20766529  | 4.8474   |
| 2        | 31.553   | 4.933 | 4280988 | 407636260 | 95.1526  |

|                |                   |              |                |            |              |                   |                                   |
|----------------|-------------------|--------------|----------------|------------|--------------|-------------------|-----------------------------------|
| Name           | CYC-20211122-11   | Rack Pos.    |                | Instrument | Instrument 1 | Operator          |                                   |
| Inj. Vol. (ul) | 8                 | Plate Pos.   |                | IRM Status | Success      |                   |                                   |
| Data File      | CYC-20211122-11.d | Method (Acq) | ZYJ-20201106.m | Comment    |              | Acq. Time (Local) | 11/25/2021 4:56:16 PM (UTC+08:00) |

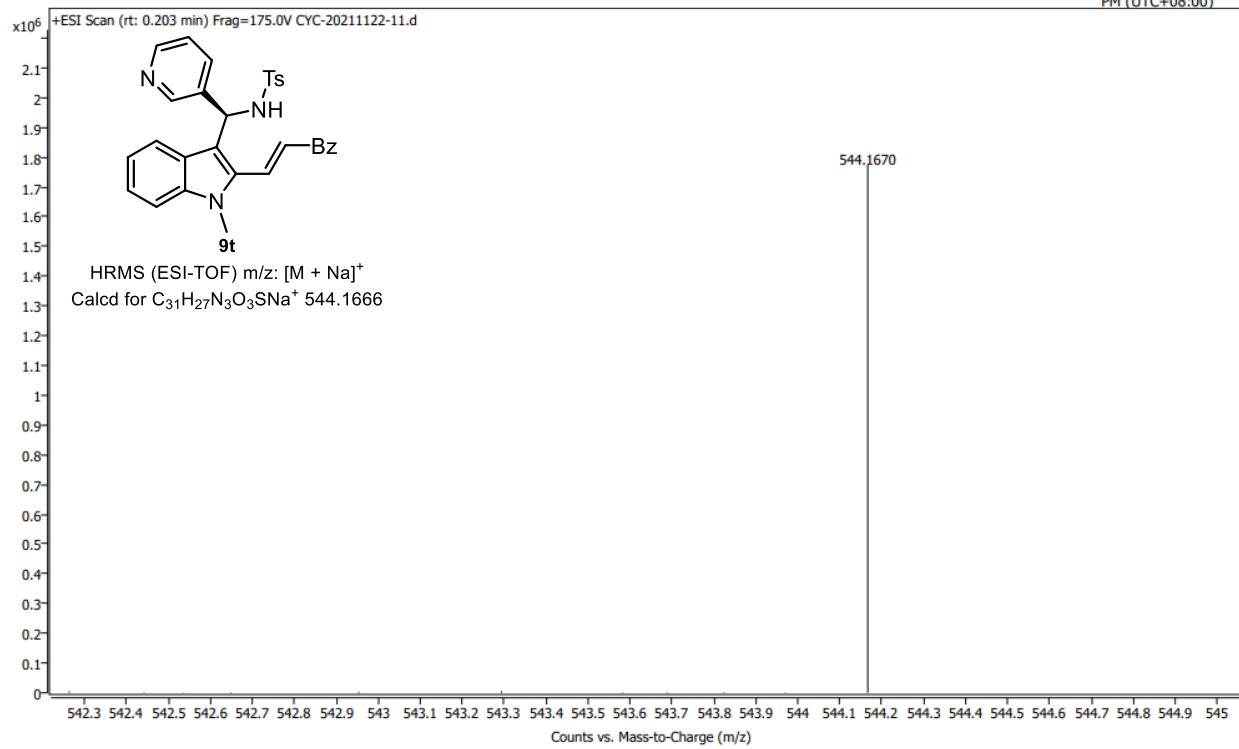

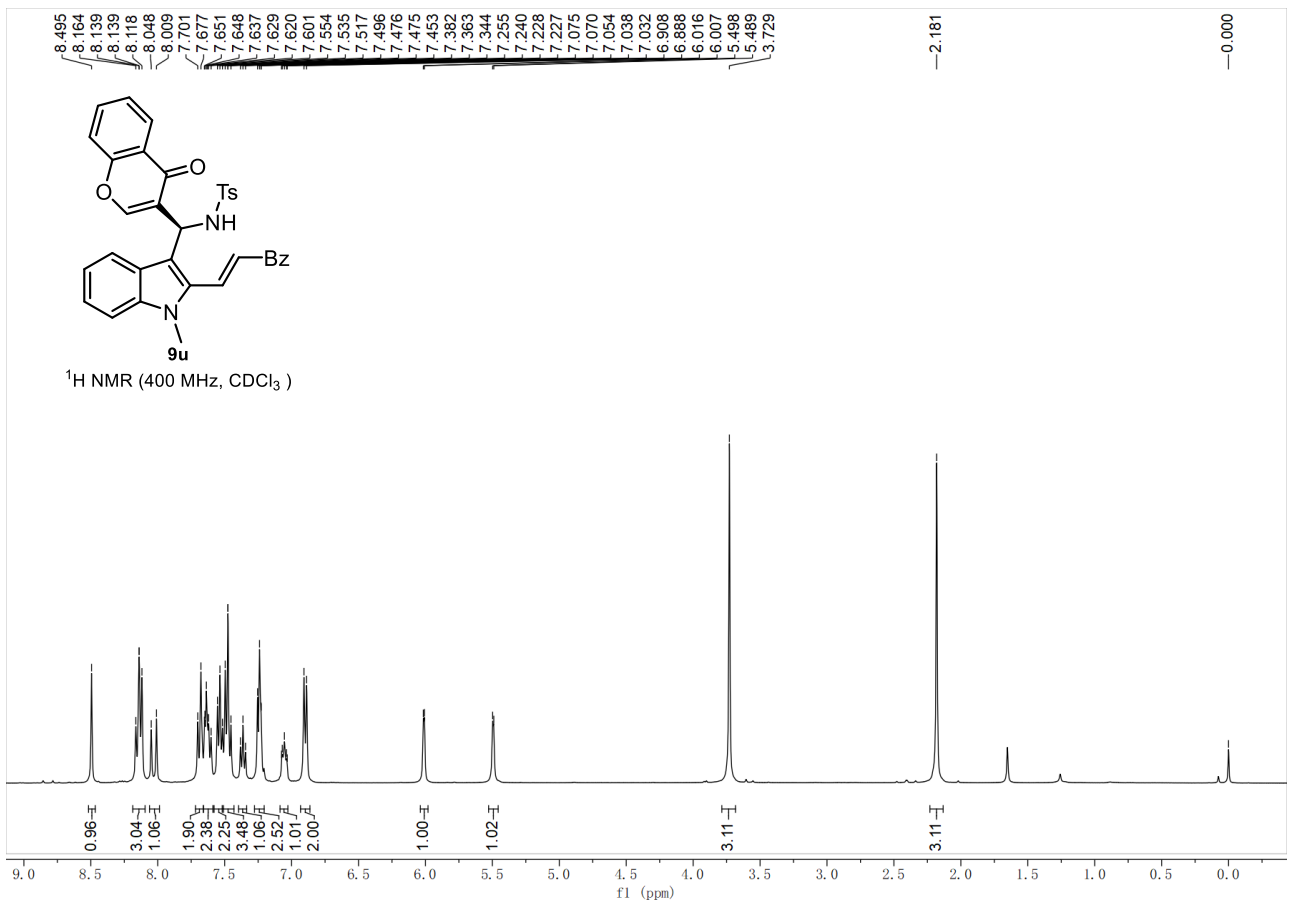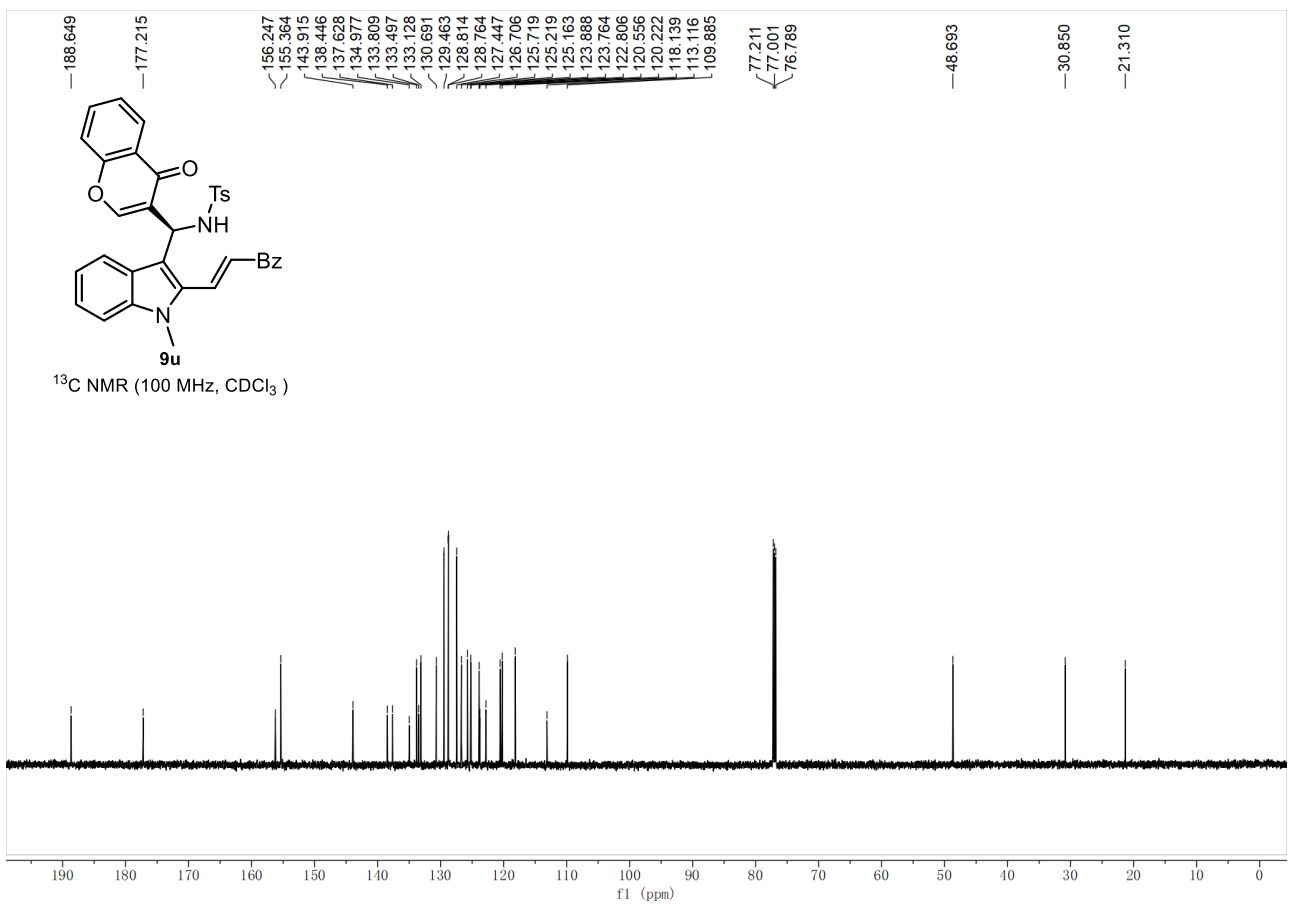

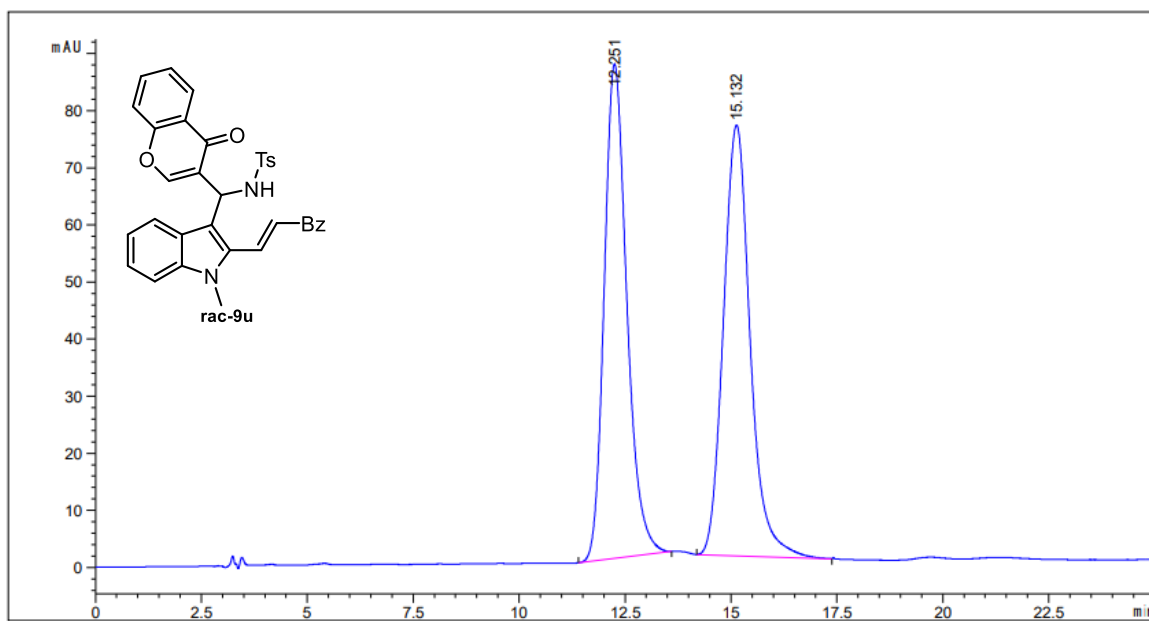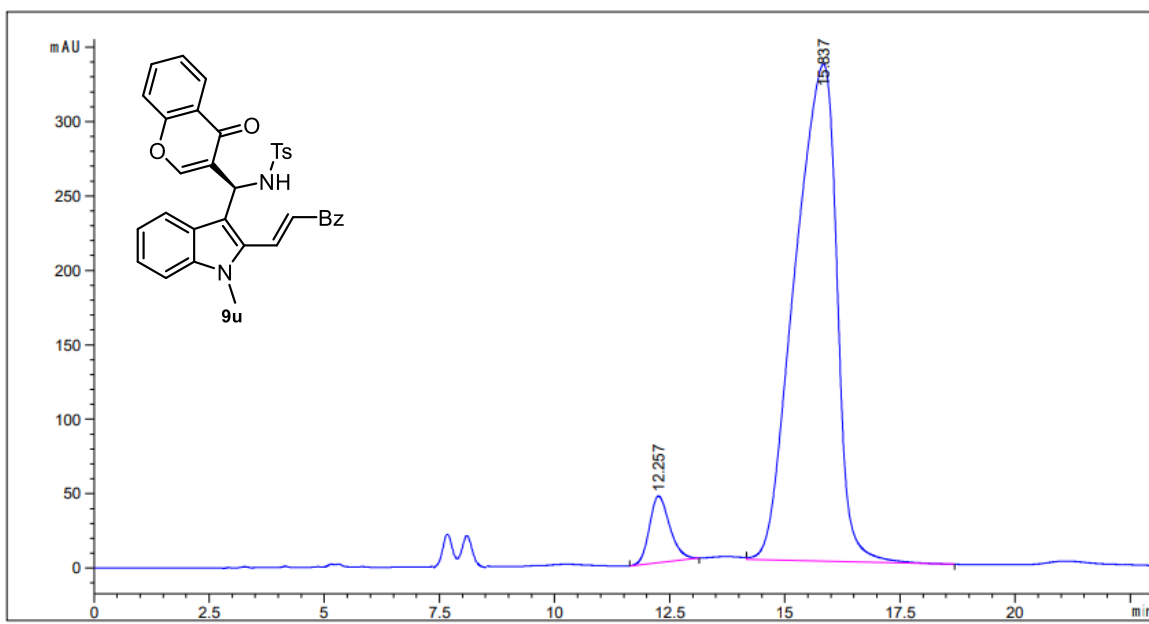

| Name           | CYC-20211122-20   | Rack Pos.    | Instrument     | Instrument 1 | Operator                                            |
|----------------|-------------------|--------------|----------------|--------------|-----------------------------------------------------|
| Inj. Vol. (ul) | 8                 | Plate Pos.   | IRM Status     | Success      |                                                     |
| Data File      | CYC-20211122-20.d | Method (Acq) | ZYJ-20201106.m | Comment      | Acq. Time (Local) 11/25/2021 5:22:50 PM (UTC+08:00) |

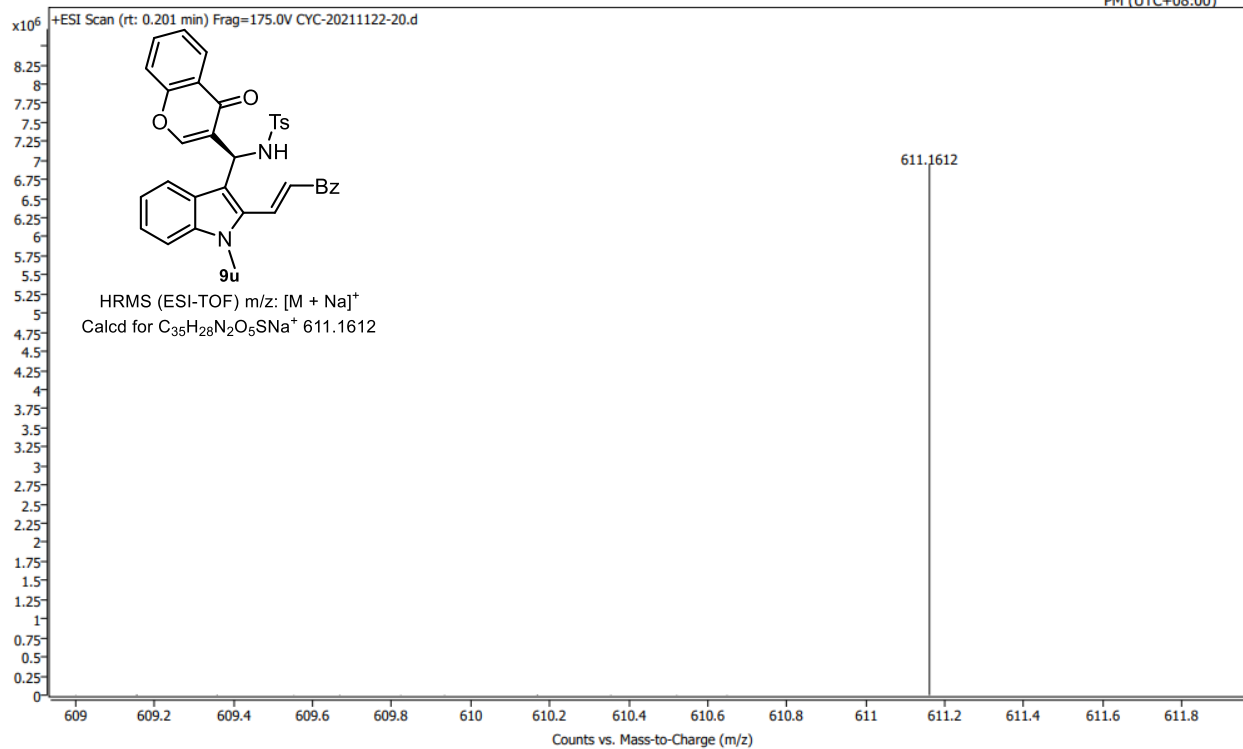

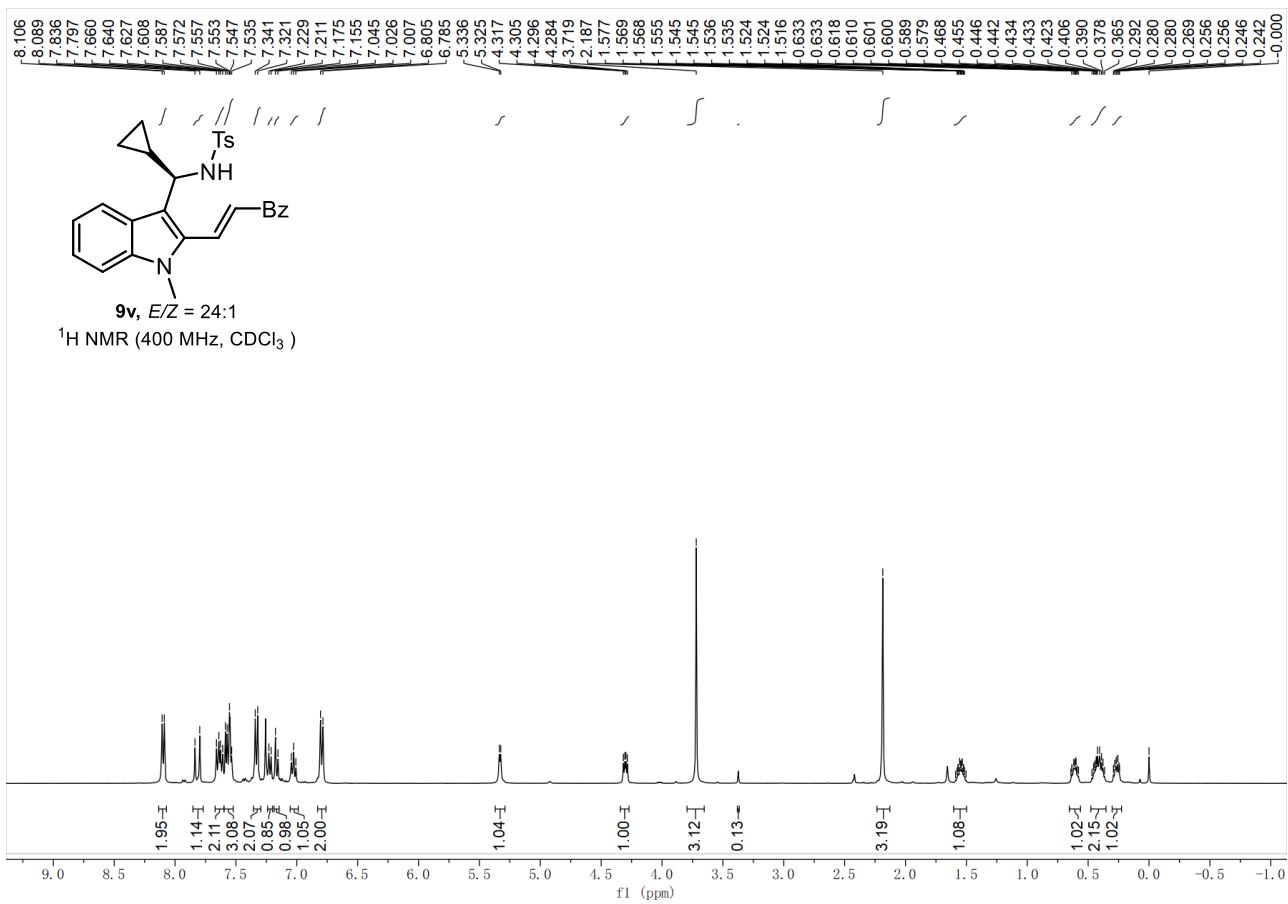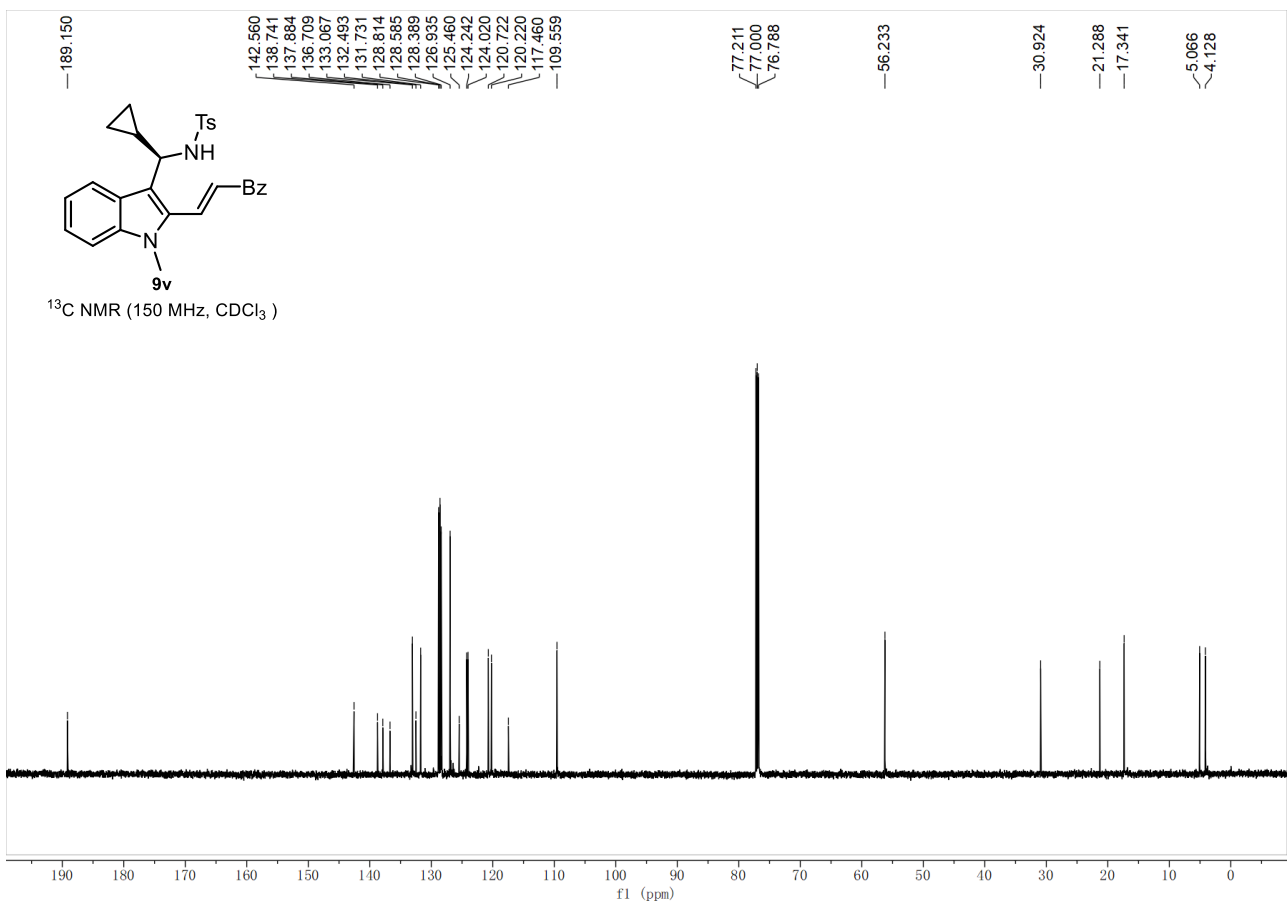



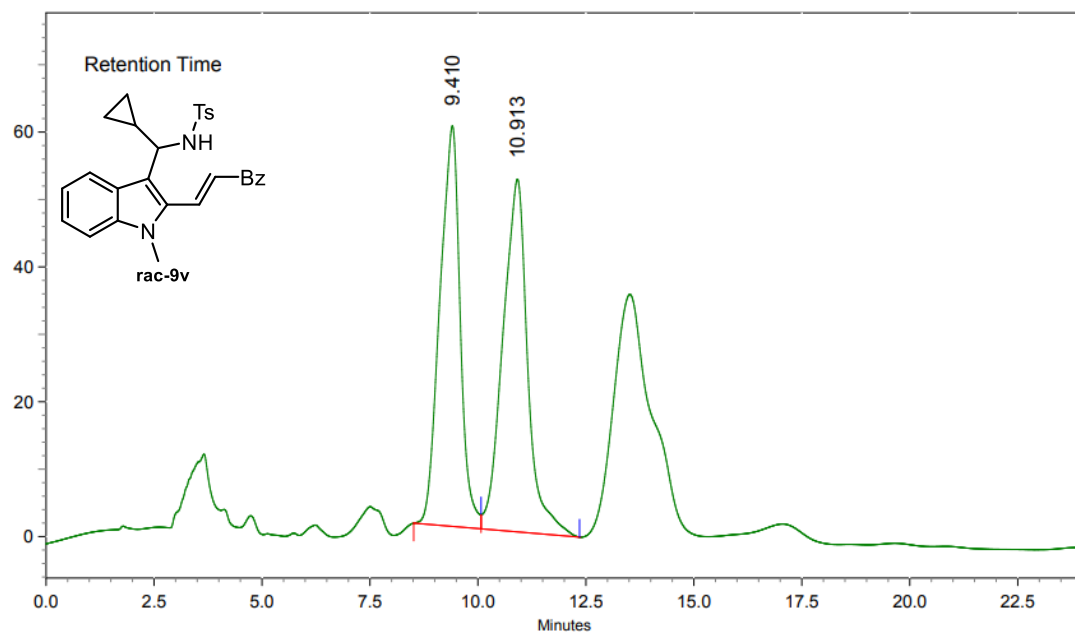

### AREA PERCENT REPORT

| Peak No. | Ret Time | Width | Height | Area     | Area [%] |
|----------|----------|-------|--------|----------|----------|
| 1        | 9.410    | 1.560 | 996789 | 32491910 | 48.1116  |
| 2        | 10.913   | 2.280 | 877866 | 35042593 | 51.8884  |

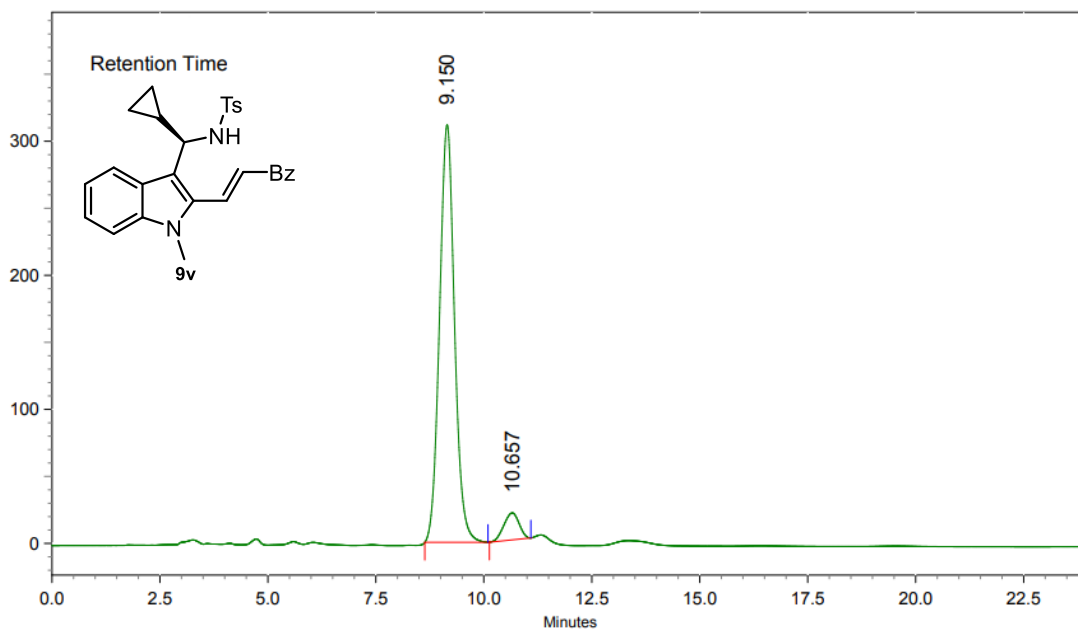

### AREA PERCENT REPORT

| Peak No. | Ret Time | Width | Height  | Area      | Area [%] |
|----------|----------|-------|---------|-----------|----------|
| 1        | 9.150    | 1.463 | 5224330 | 125892065 | 93.8284  |
| 2        | 10.657   | 0.960 | 337253  | 8280647   | 6.1716   |

Name: CYC-20211122-15  
Inj. Vol. (ul): 8  
Data File: CYC-20211122-15.d  
Rack Pos.:  
Plate Pos.:  
Method (Acq): ZYJ-20201106.m  
Instrument: IRM Status  
IRM Status Comment:  
Instrument 1 Success:  
Operator:  
Acq. Time (Local): 11/25/2021 5:08:04 PM (UTC+08:00)

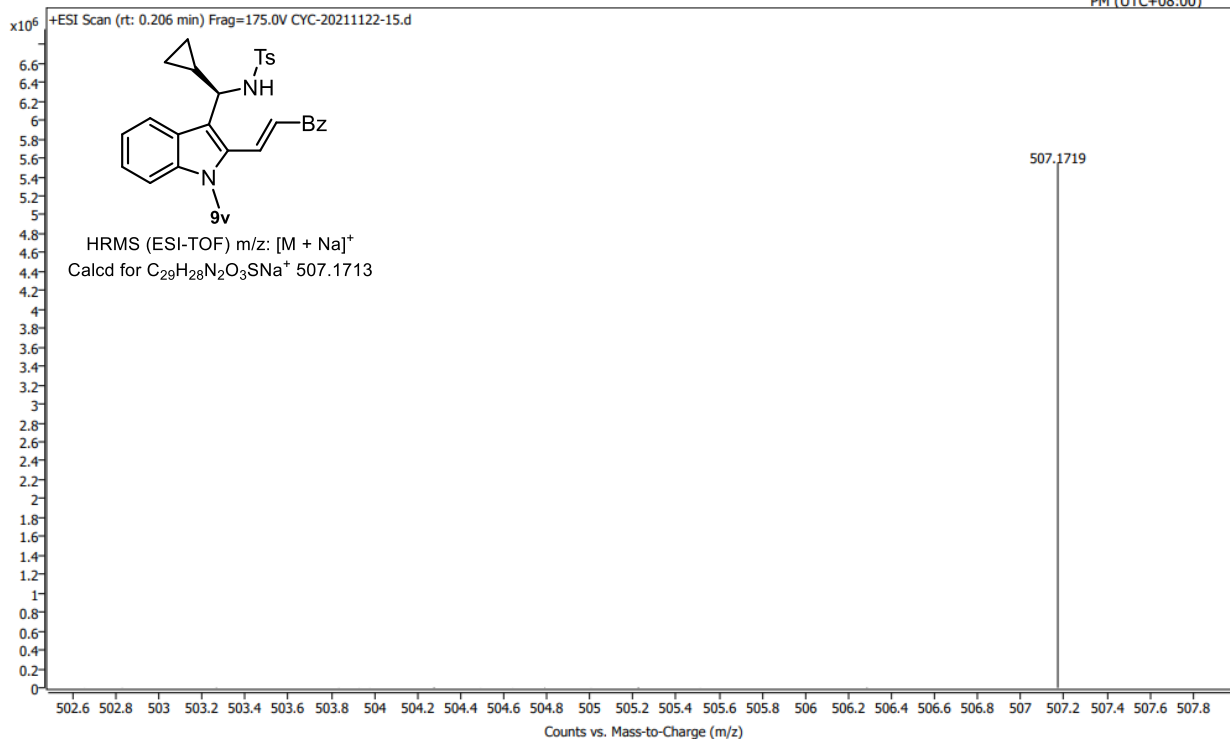

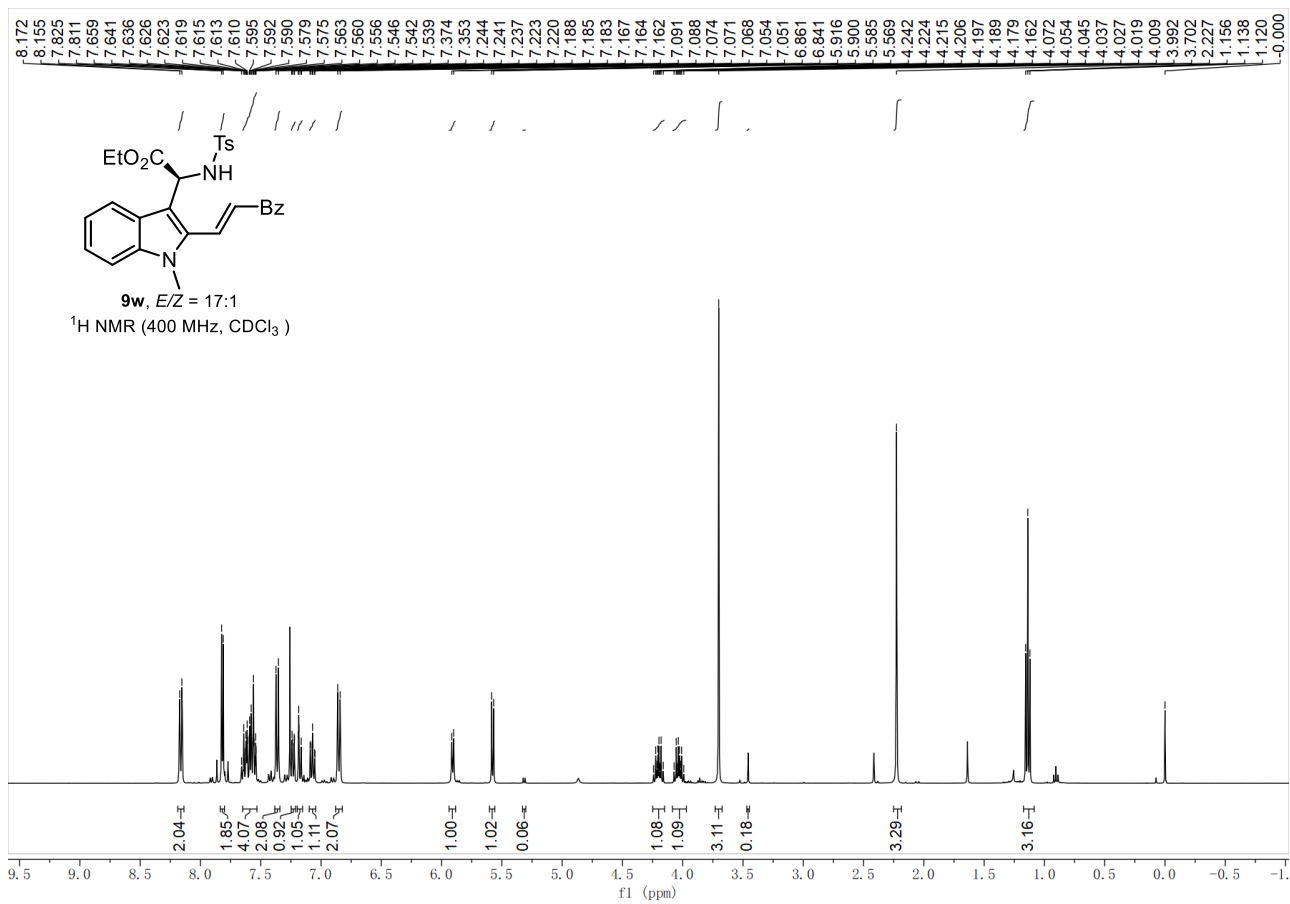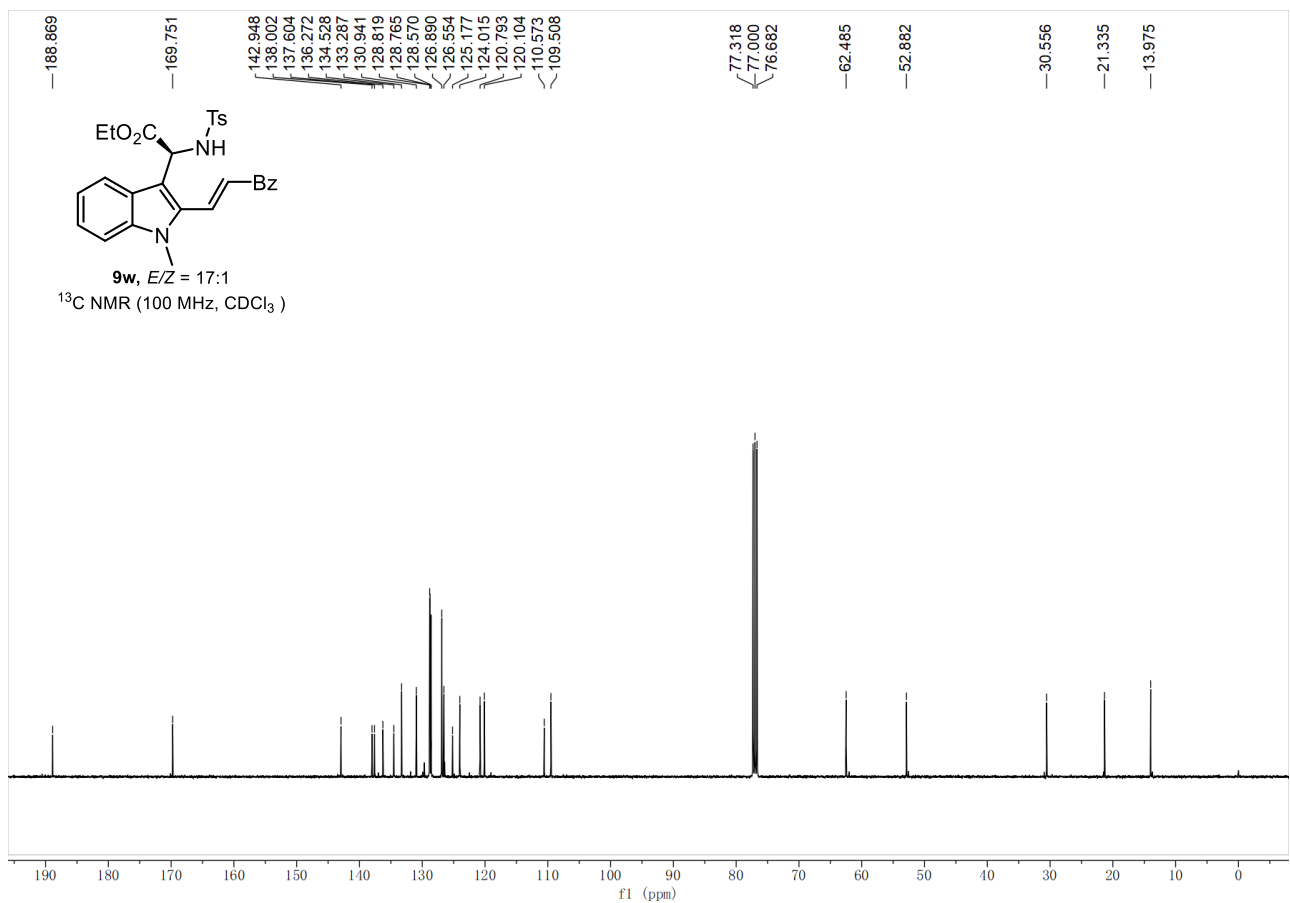

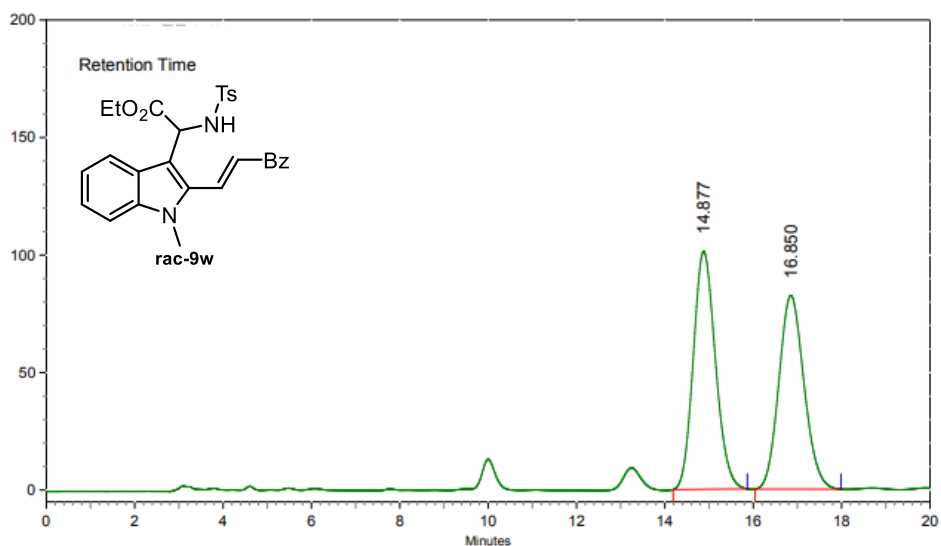

### AREA PERCENT REPORT

| Peak No. | Ret Time | Width | Height  | Area     | Area [%] |
|----------|----------|-------|---------|----------|----------|
| 1        | 14.877   | 1.680 | 1699988 | 59201541 | 51.9062  |
| 2        | 16.850   | 1.947 | 1383275 | 54853235 | 48.0938  |

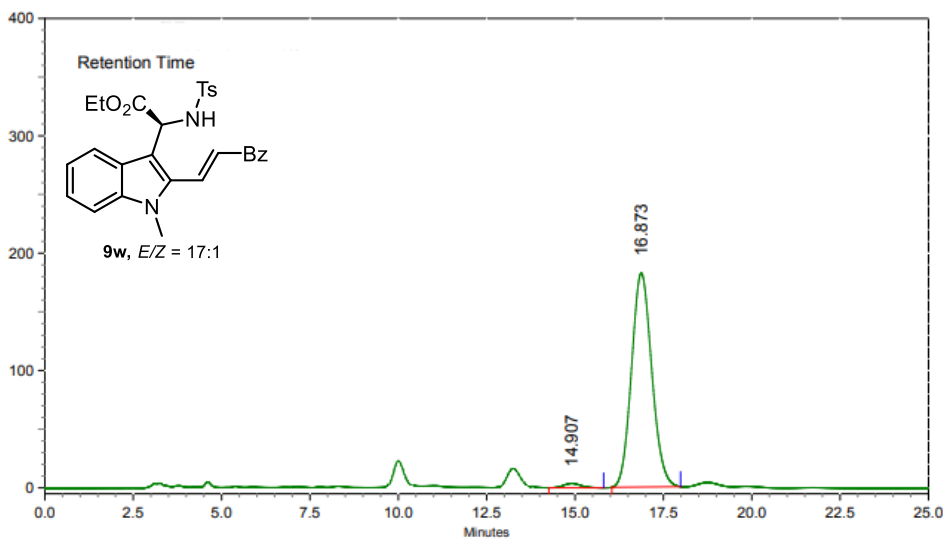

### AREA PERCENT REPORT

| Peak No. | Ret Time | Width | Height  | Area      | Area [%] |
|----------|----------|-------|---------|-----------|----------|
| 1        | 14.907   | 1.550 | 62750   | 2128894   | 1.7129   |
| 2        | 16.873   | 1.947 | 3058157 | 122154159 | 98.2871  |

Name: CYC-20211122-19  
Inj. Vol. (ul): 8  
Data File: CYC-20211122-19.d  
Rack Pos.: 8  
Plate Pos.:  
Method (Acq): ZYJ-20201106.m  
Instrument: Success  
IRM Status: Comment  
Instrument 1: Success  
Operator:  
Acq. Time (Local): 11/25/2021 5:19:53 PM (UTC+08:00)

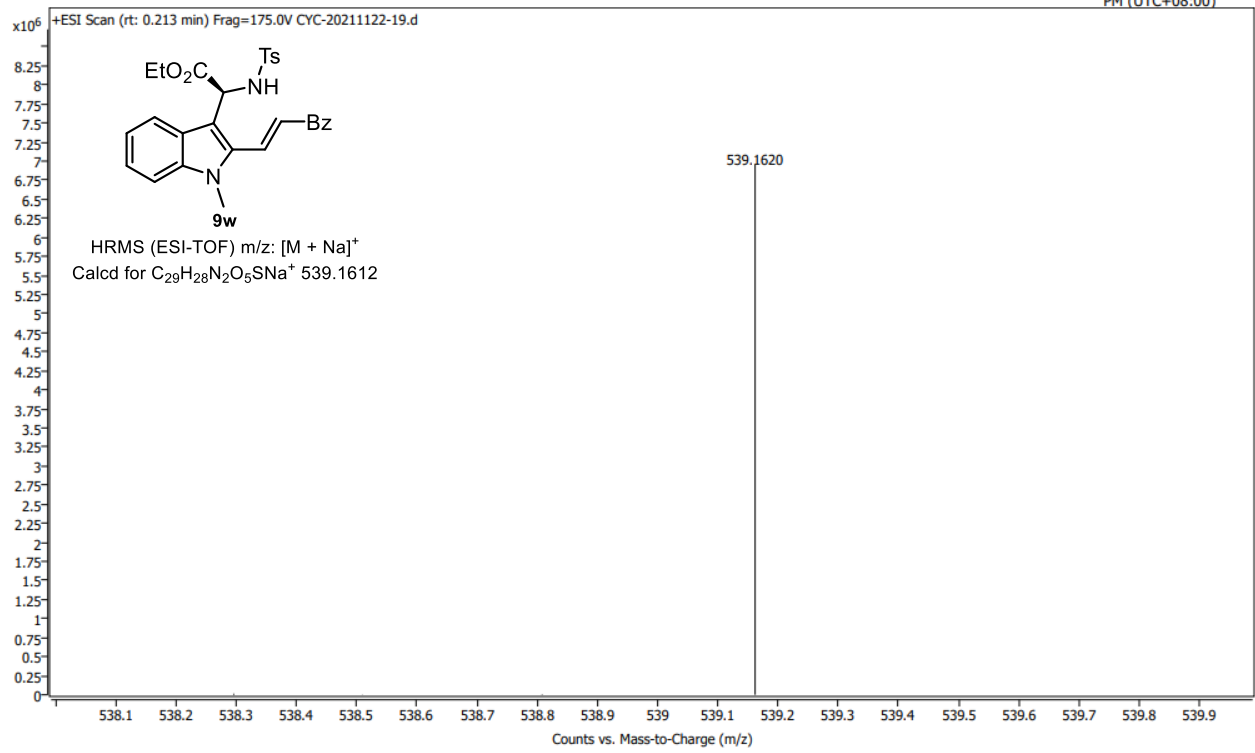

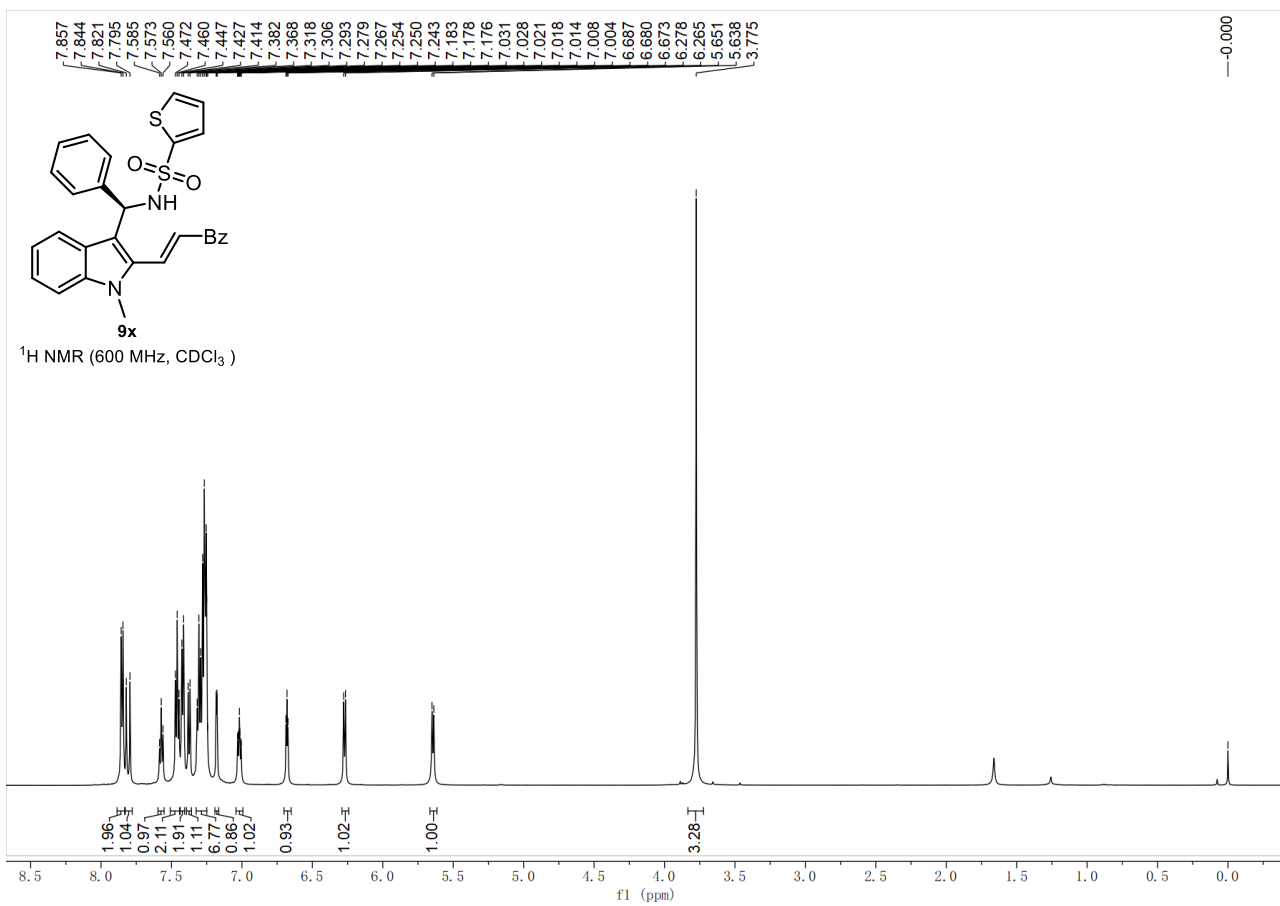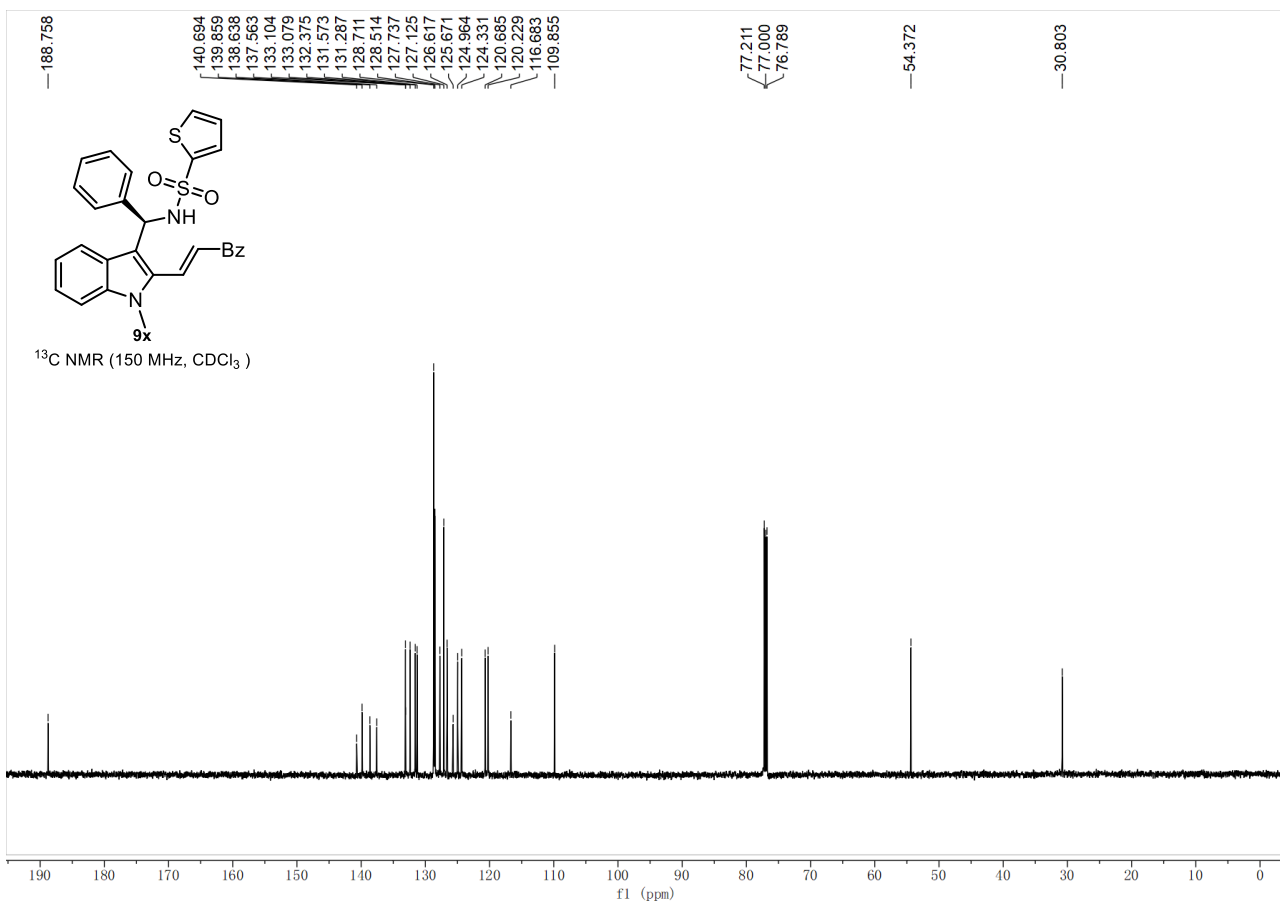

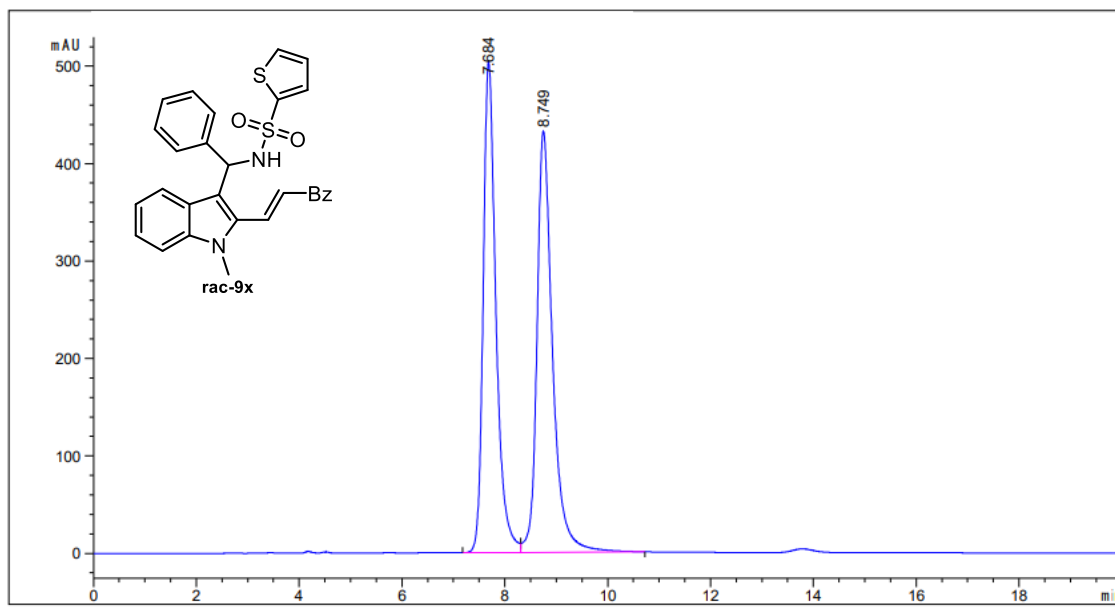

| # | [min]     | [min]  | [mAU*s]    | [mAU]     | %       |
|---|-----------|--------|------------|-----------|---------|
| 1 | 7.684 BV  | 0.2592 | 8683.84863 | 504.04816 | 48.8358 |
| 2 | 8.749 VBA | 0.3141 | 9097.86035 | 432.13358 | 51.1642 |

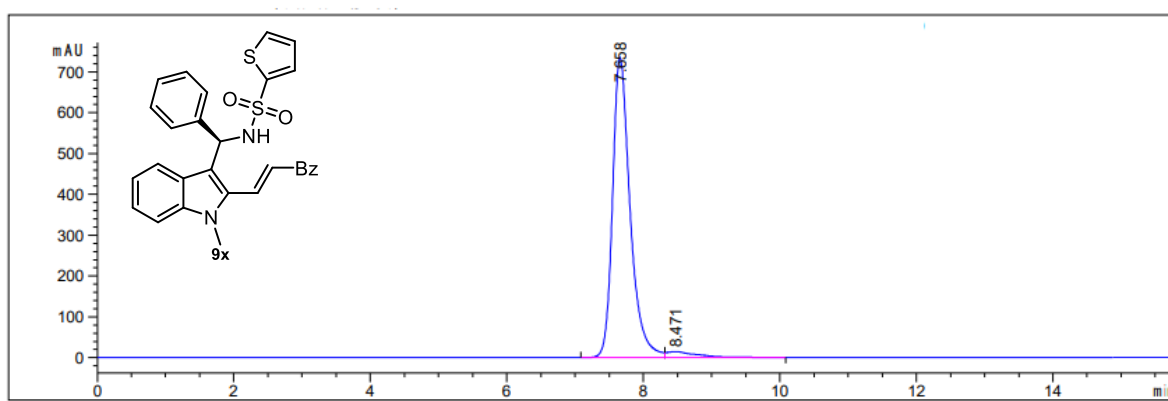

| # | [min]    | [min]  | [mAU*s]   | [mAU]     | %       |
|---|----------|--------|-----------|-----------|---------|
| 1 | 7.658 BV | 0.2677 | 1.31134e4 | 735.52069 | 96.7122 |
| 2 | 8.471 VB | 0.4113 | 445.80045 | 14.67216  | 3.2878  |

|                |                   |              |                |            |              |                   |                                   |
|----------------|-------------------|--------------|----------------|------------|--------------|-------------------|-----------------------------------|
| Name           | CYC-20211122-22   | Rack Pos.    |                | Instrument | Instrument 1 | Operator          |                                   |
| Inj. Vol. (ul) | 8                 | Plate Pos.   |                | IRM Status | Success      |                   |                                   |
| Data File      | CYC-20211122-22.d | Method (Acq) | ZYJ-20201106.m | Comment    |              | Acq. Time (Local) | 11/25/2021 5:28:44 PM (UTC+08:00) |

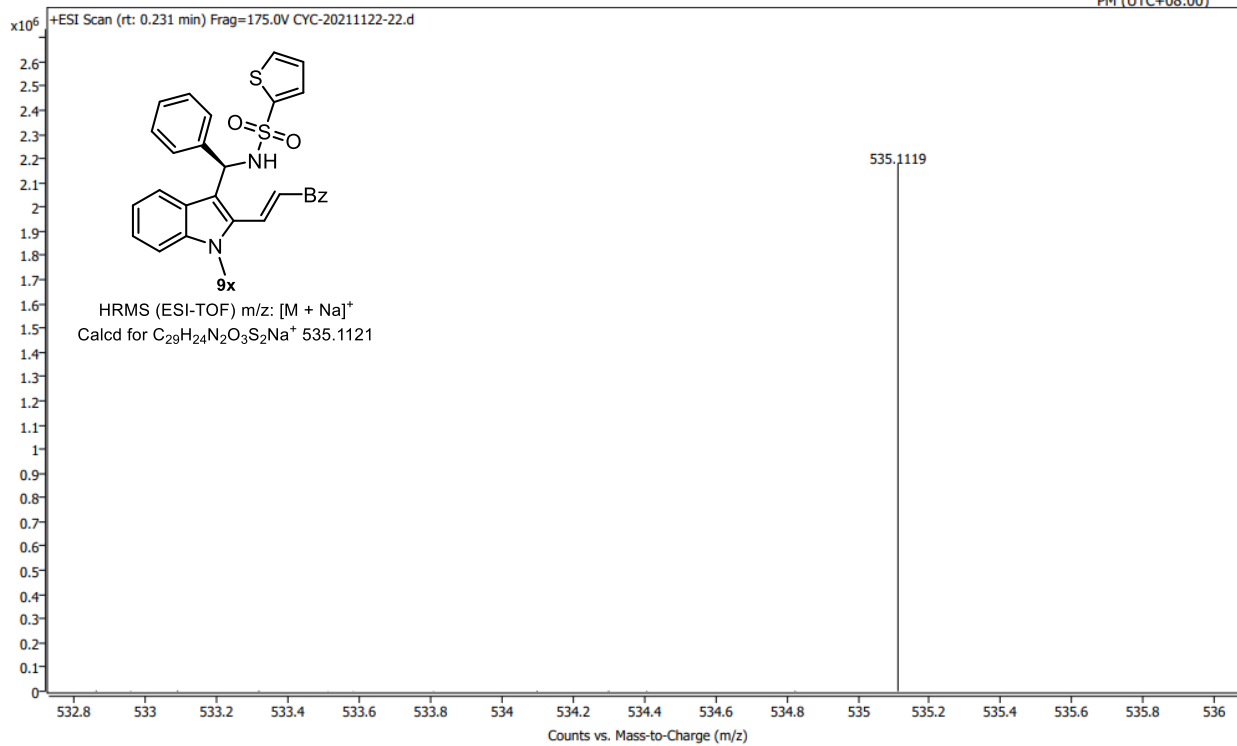



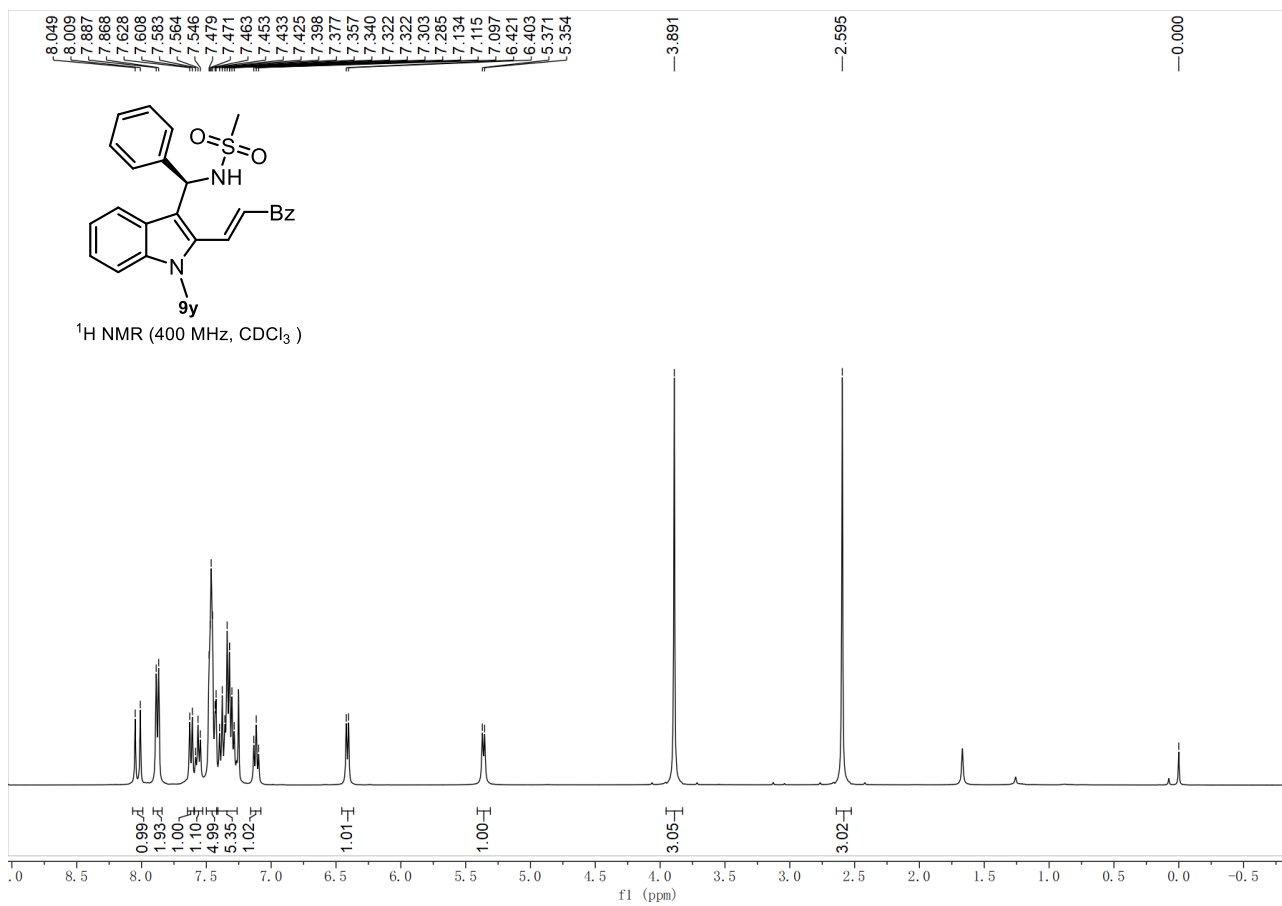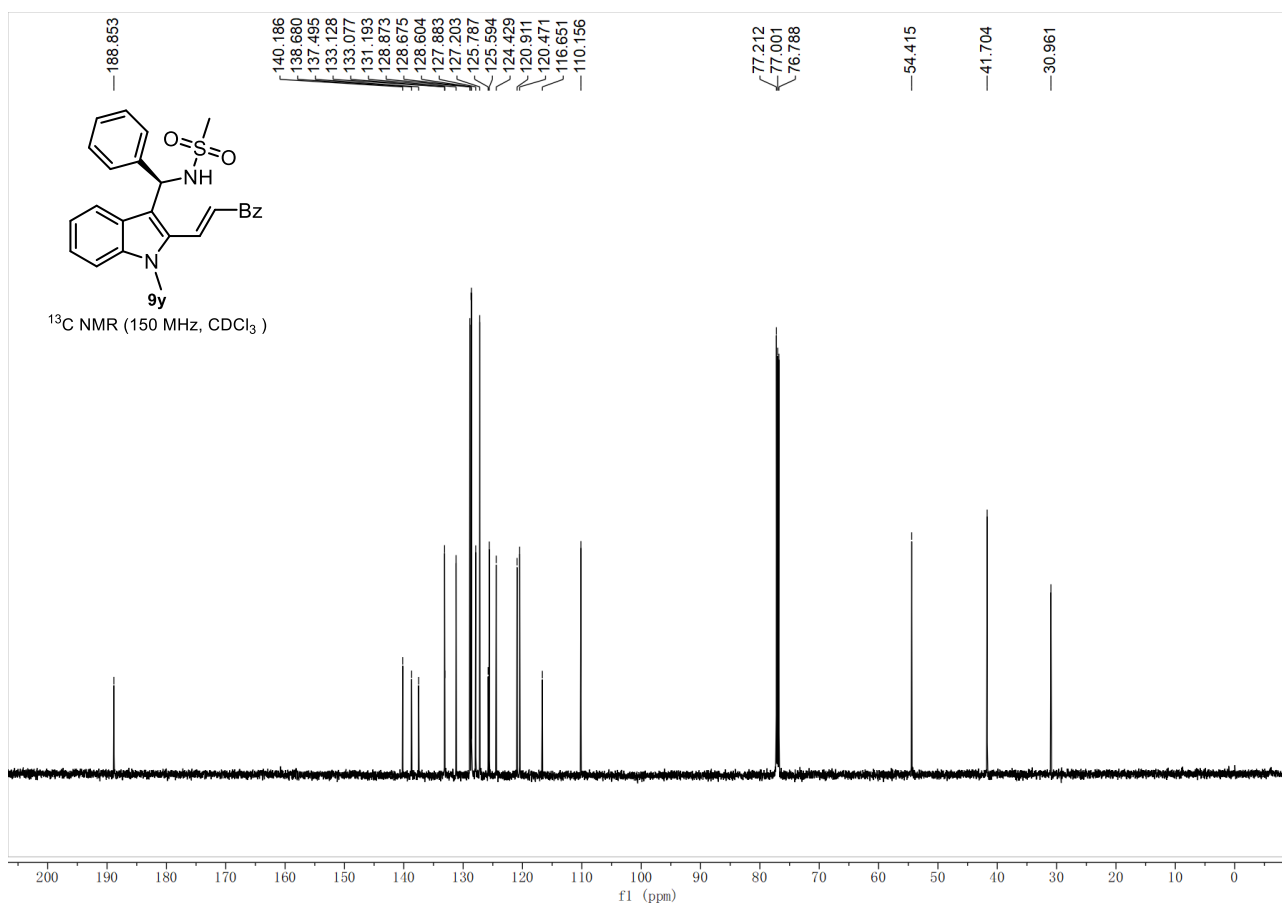

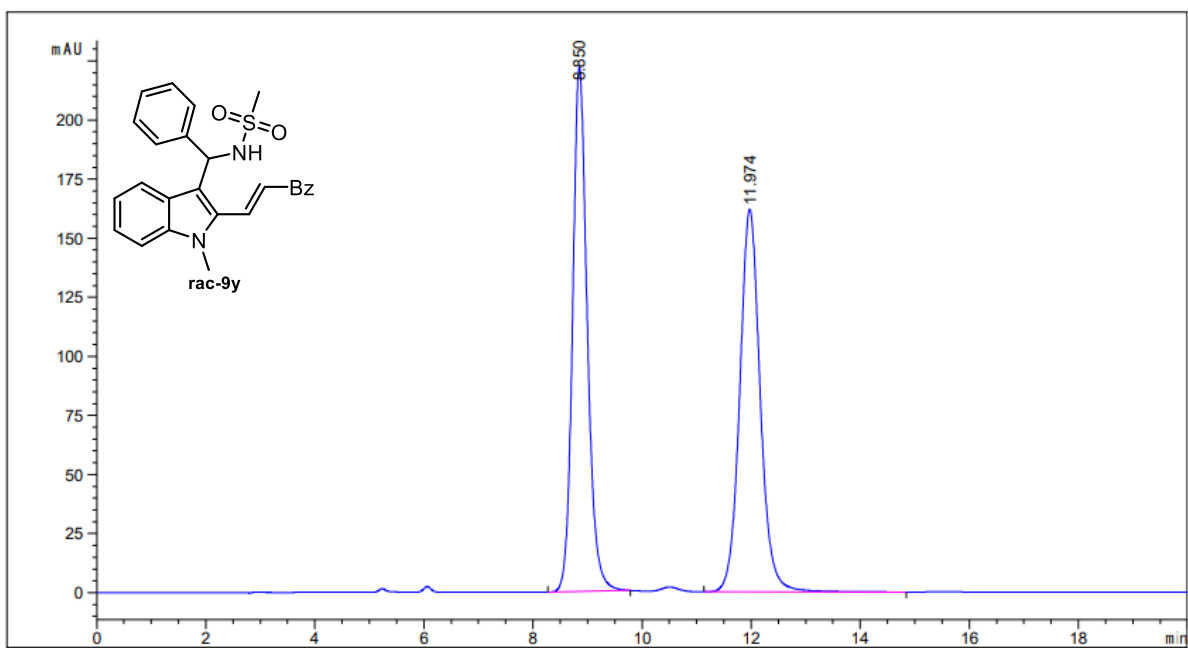

| # | [min]  | [min] | [mAU*s] | [mAU]      | %         |         |
|---|--------|-------|---------|------------|-----------|---------|
| 1 | 8.850  | BBA   | 0.2829  | 4140.24658 | 222.21770 | 49.4794 |
| 2 | 11.974 | BB    | 0.3979  | 4227.36621 | 161.87129 | 50.5206 |

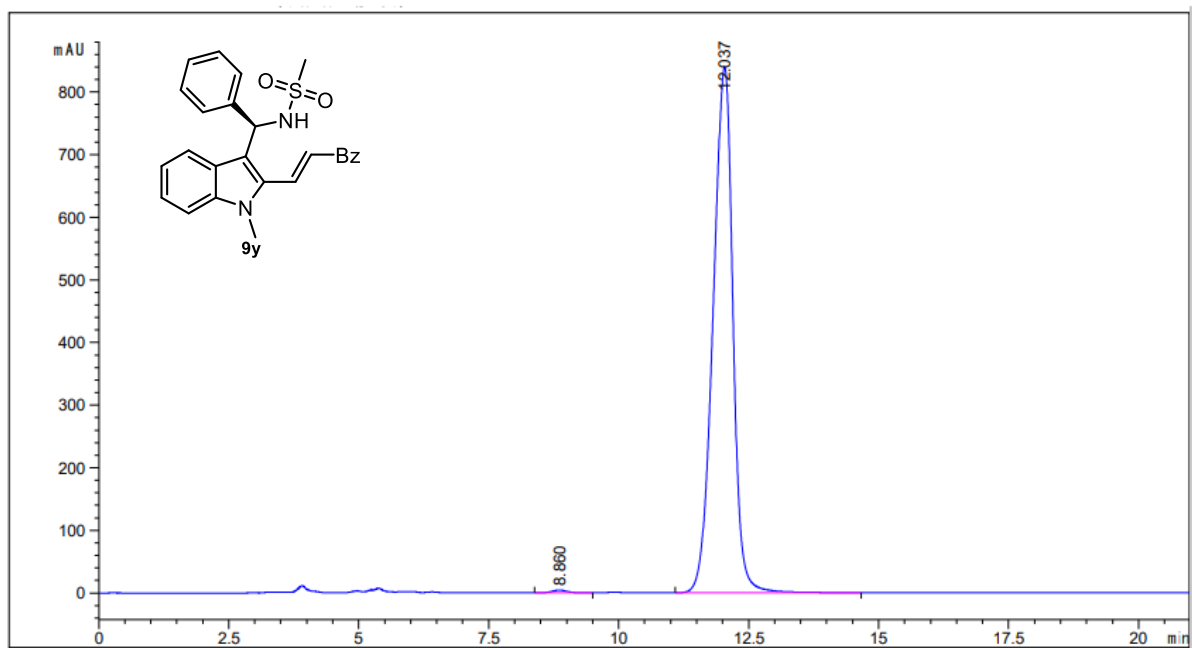

| # | [min]  | [min] | [mAU*s] | [mAU]     | %         |         |
|---|--------|-------|---------|-----------|-----------|---------|
| 1 | 8.860  | BB    | 0.2910  | 83.94486  | 4.37178   | 0.3756  |
| 2 | 12.037 | BB    | 0.4114  | 2.22635e4 | 839.33252 | 99.6244 |

|                |                   |              |                |            |              |                                                     |
|----------------|-------------------|--------------|----------------|------------|--------------|-----------------------------------------------------|
| Name           | CYC-20211122-21   | Rack Pos.    |                | Instrument | Instrument 1 | Operator                                            |
| Inj. Vol. (ul) | 8                 | Plate Pos.   |                | IRM Status | Success      |                                                     |
| Data File      | CYC-20211122-21.d | Method (Acq) | ZYJ-20201106.m | Comment    |              | Acq. Time (Local) 11/25/2021 5:25:47 PM (UTC+08:00) |

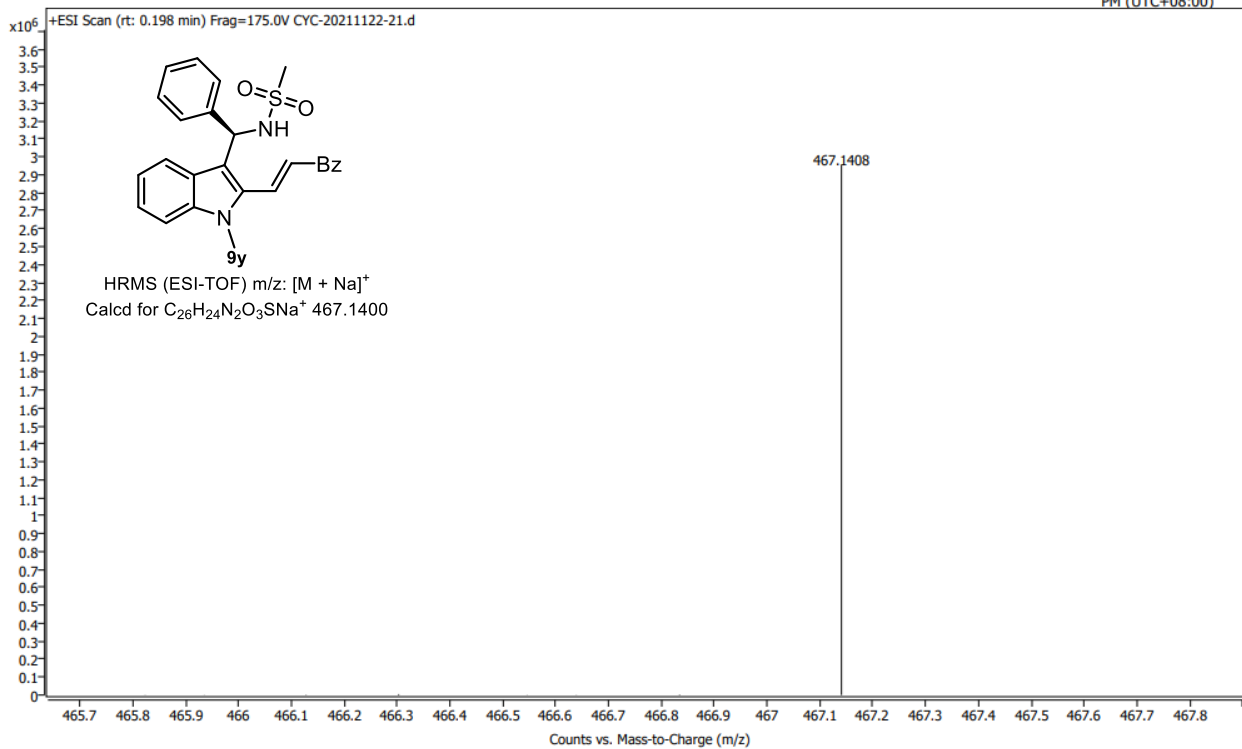

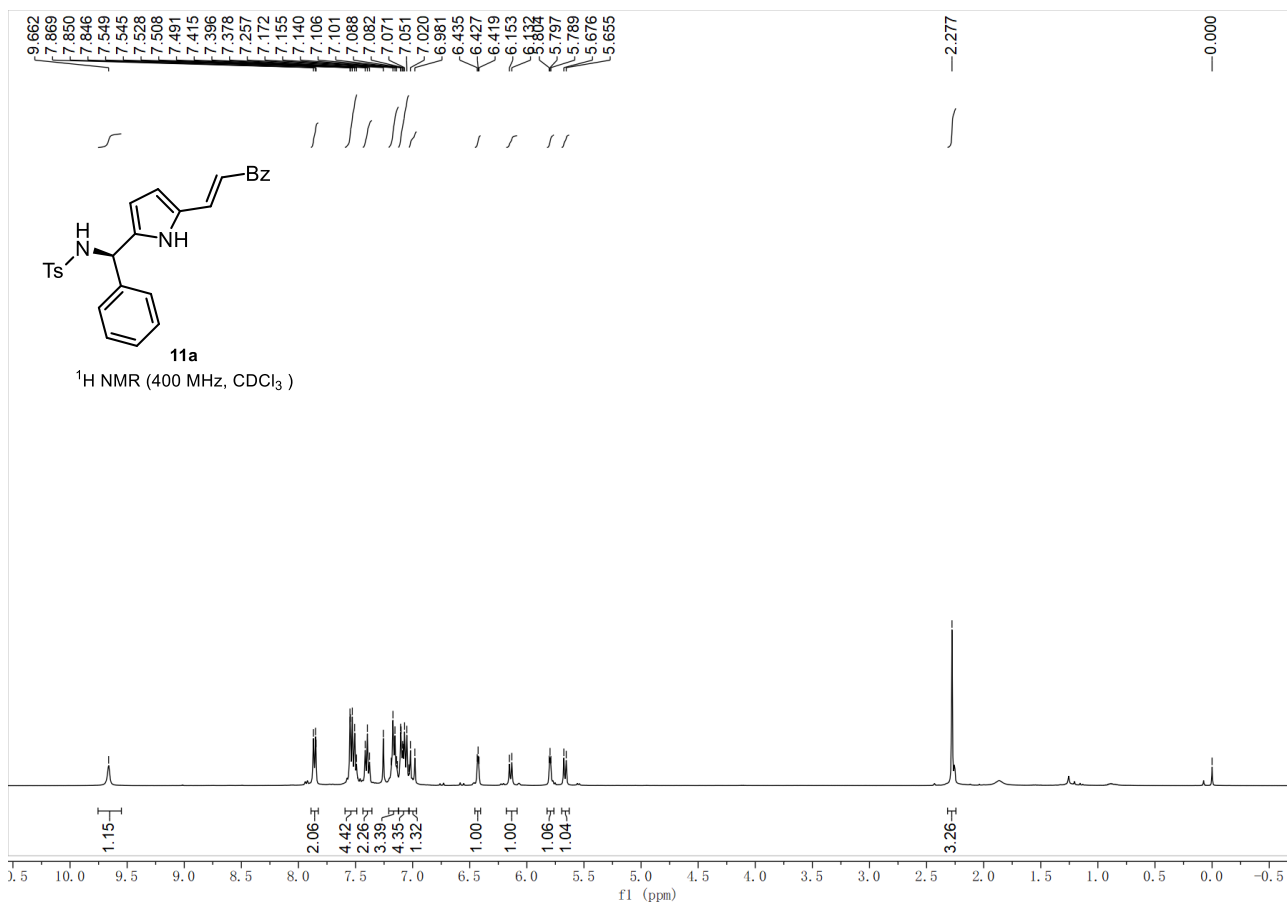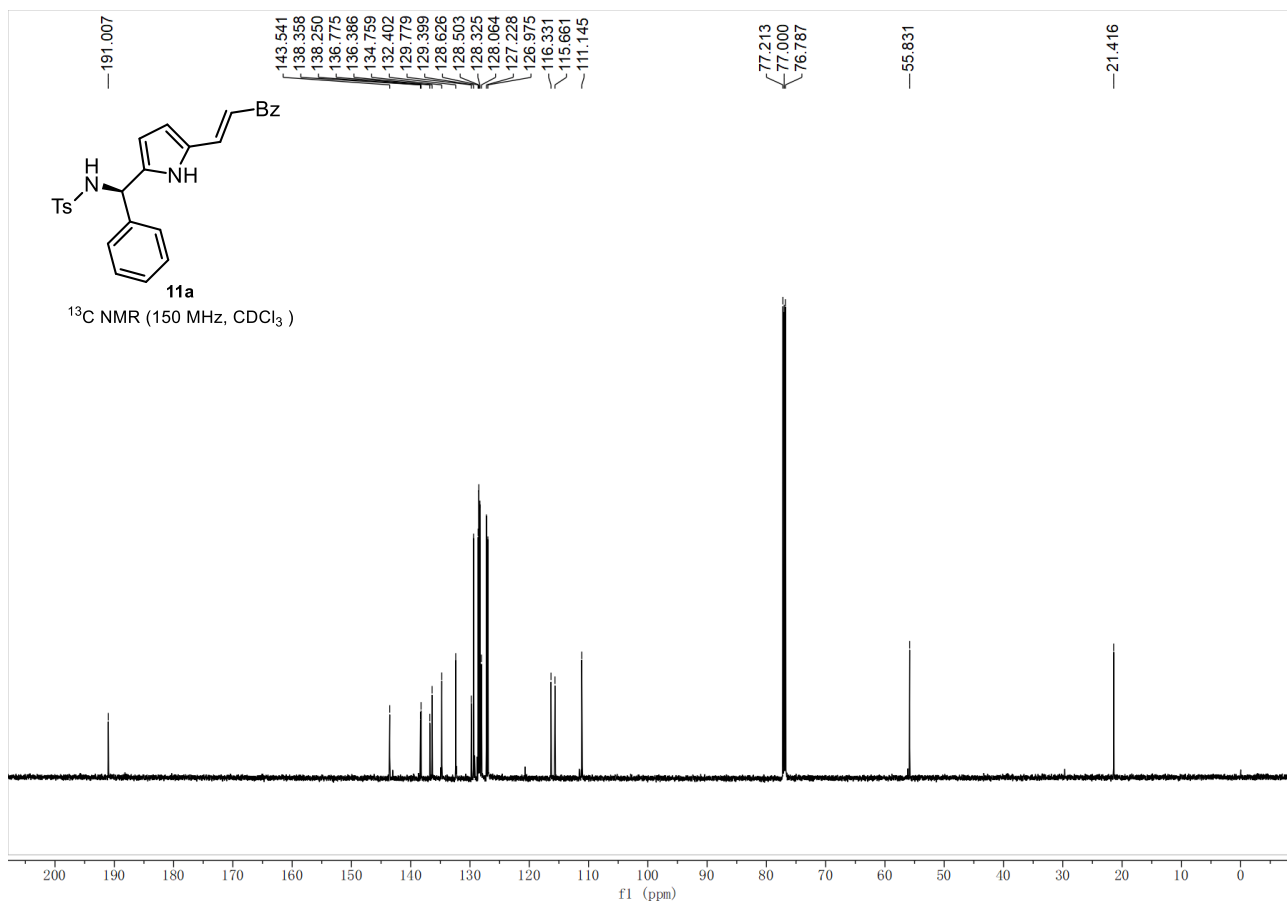

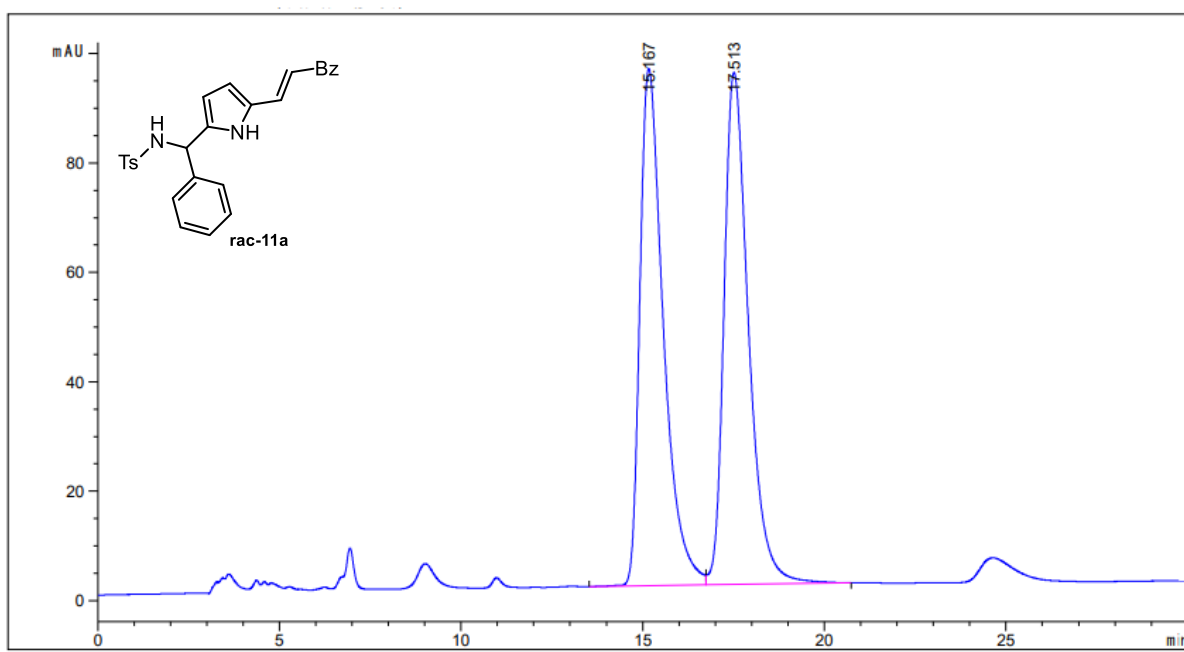

| # | [min]     | [min]  | [mAU*s]    | [mAU]    | %       |
|---|-----------|--------|------------|----------|---------|
| 1 | 15.167 BV | 0.6820 | 4254.12012 | 94.57399 | 49.2873 |
| 2 | 17.513 VB | 0.7111 | 4377.14258 | 93.67582 | 50.7127 |

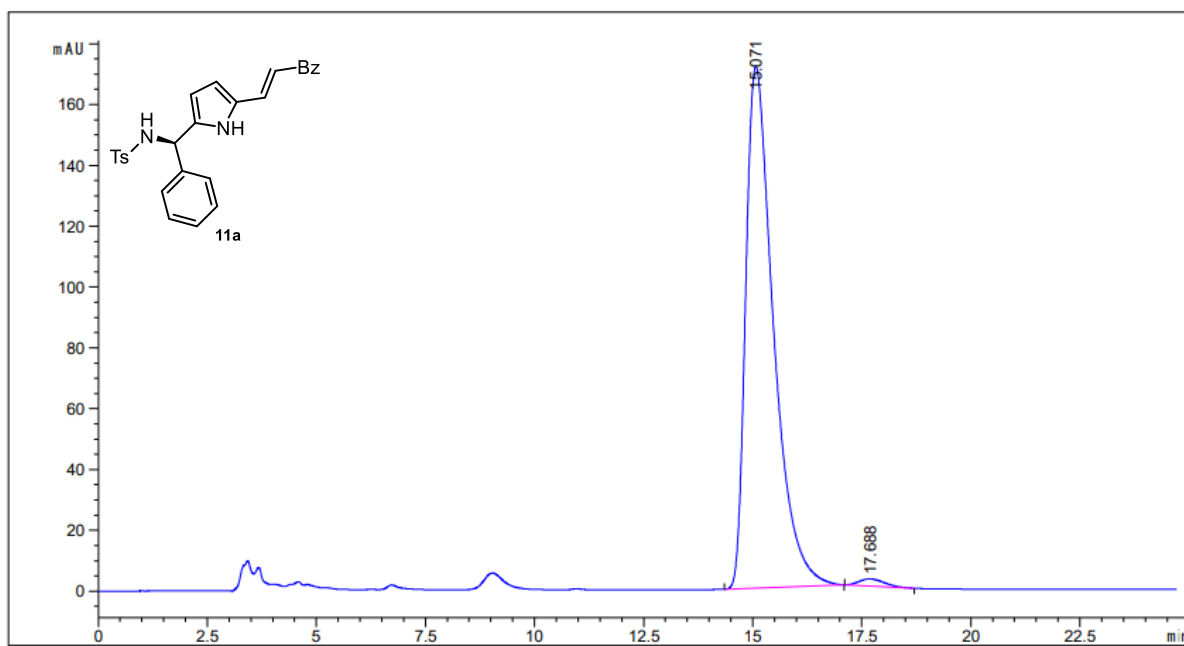

| # | [min]     | [min]  | [mAU*s]    | [mAU]     | %       |
|---|-----------|--------|------------|-----------|---------|
| 1 | 15.071 BB | 0.6659 | 7563.99414 | 171.51733 | 98.7498 |
| 2 | 17.688 BB | 0.5725 | 95.76326   | 2.37399   | 1.2502  |

| Name           | CYC-20211129-53   | Rack Pos.    | Instrument     | Instrument 1 | Operator                                           |
|----------------|-------------------|--------------|----------------|--------------|----------------------------------------------------|
| Inj. Vol. (ul) | 8                 | Plate Pos.   | IRM Status     | Success      |                                                    |
| Data File      | CYC-20211129-53.d | Method (Acq) | ZYJ-20201106.m | Comment      | Acq. Time (Local) 12/1/2021 6:15:53 PM (UTC+08:00) |

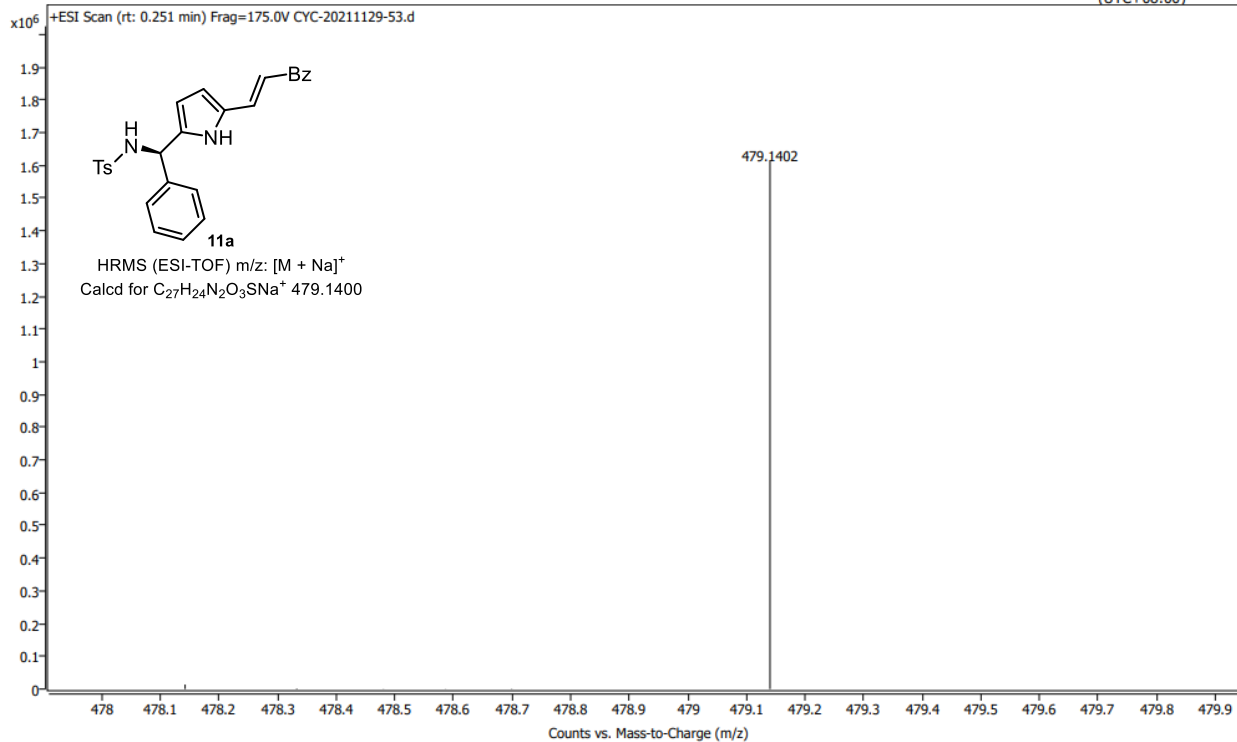

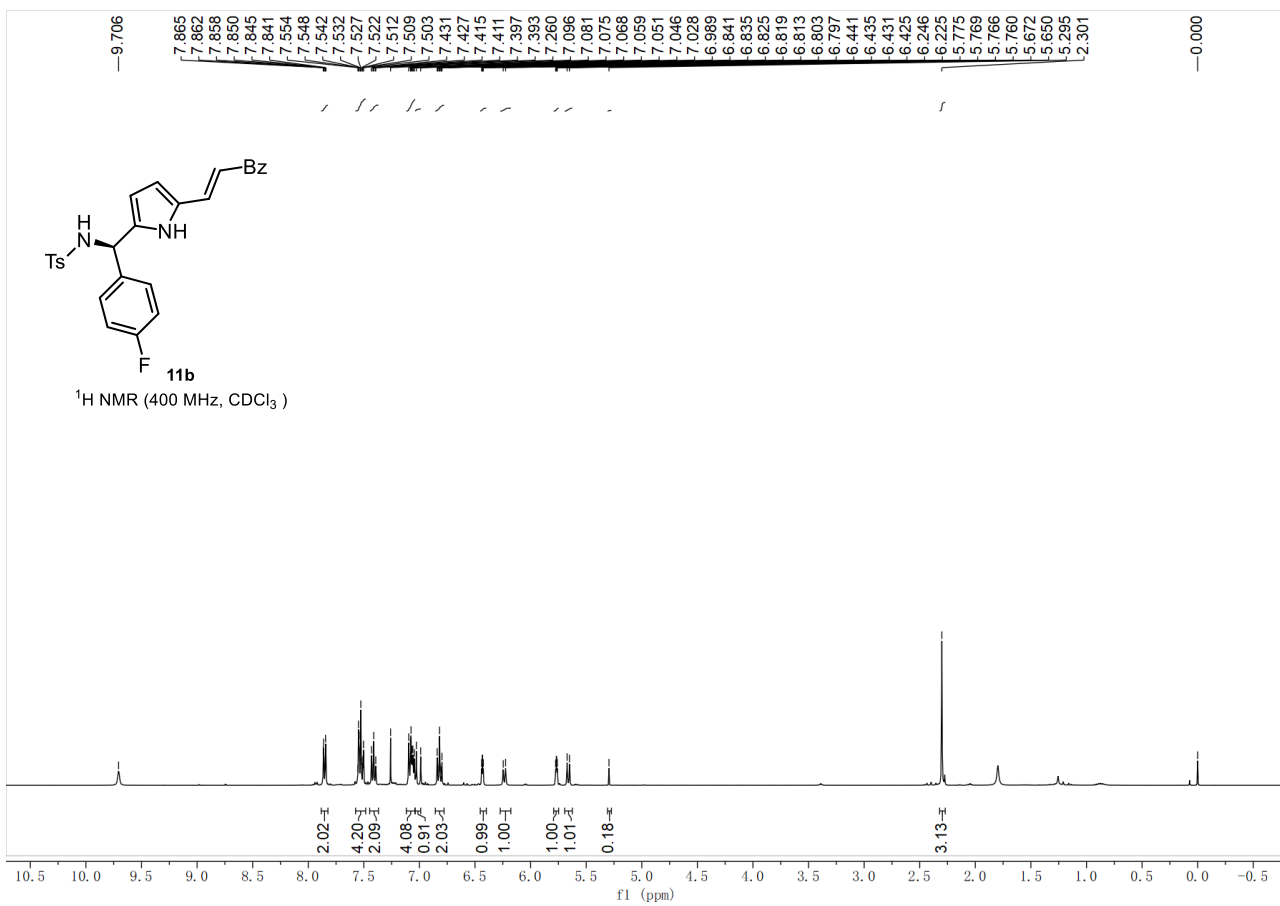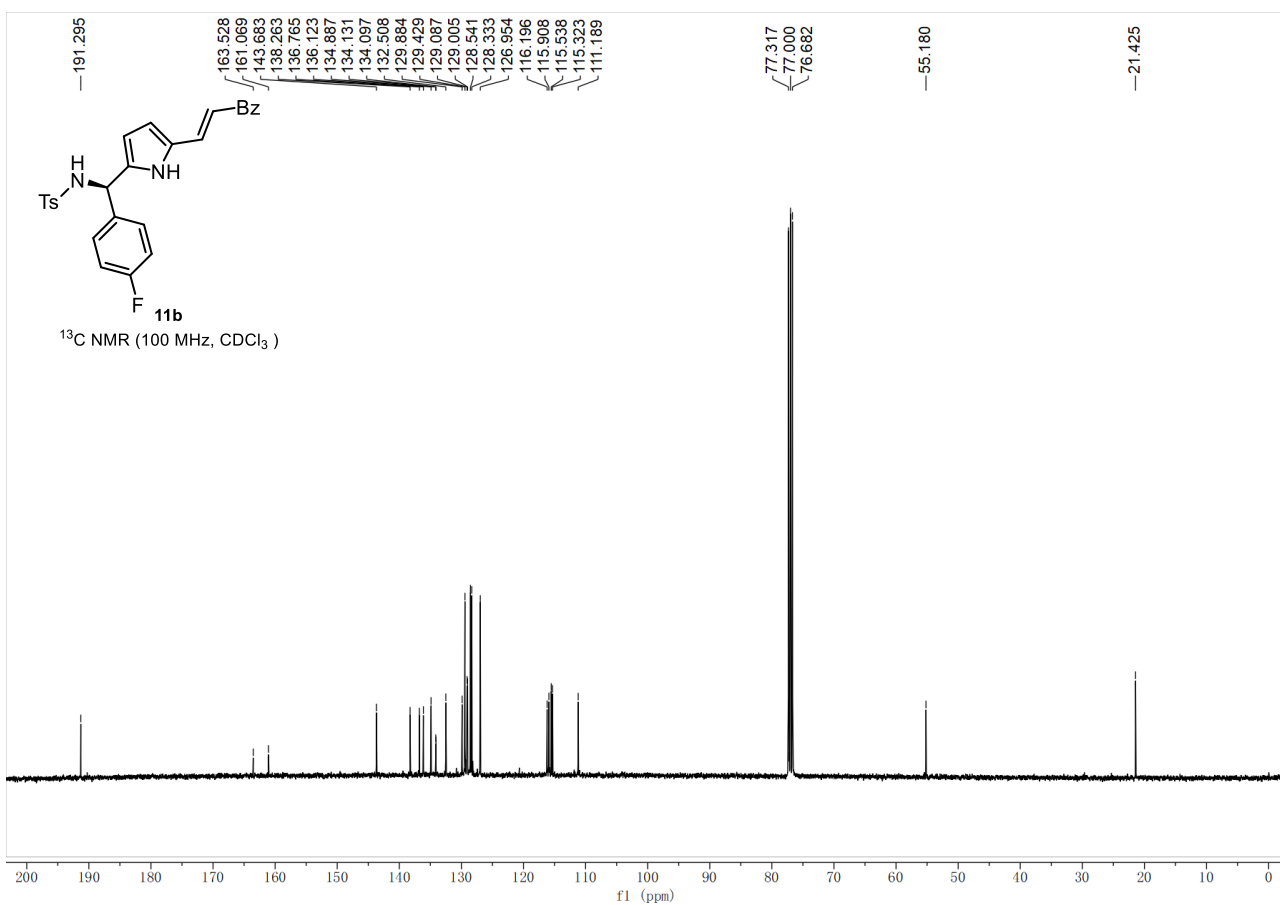

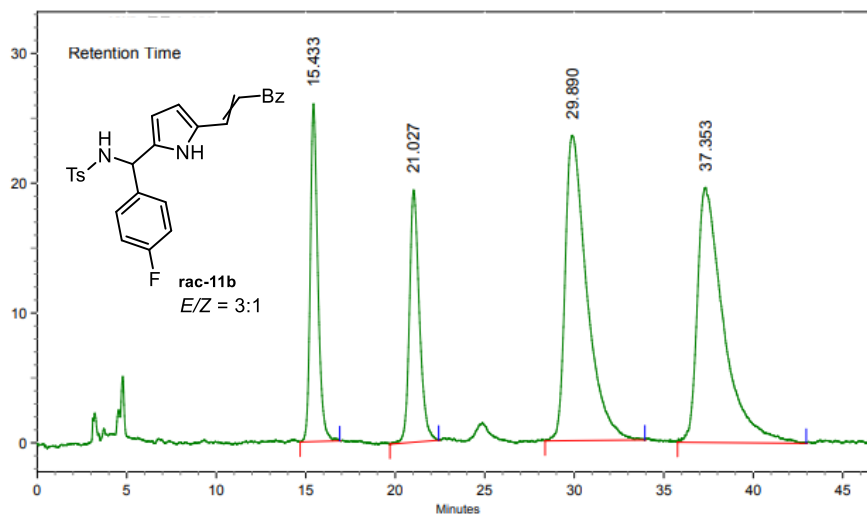

### AREA PERCENT REPORT

| Peak No. | Ret Time | Width | Height | Area     | Area [%] |
|----------|----------|-------|--------|----------|----------|
| 1        | 15.433   | 2.210 | 436644 | 12770825 | 13.8708  |
| 2        | 21.027   | 2.723 | 326034 | 12600103 | 13.6854  |
| 3        | 29.890   | 5.573 | 394524 | 33193753 | 36.0527  |
| 4        | 37.353   | 7.190 | 329626 | 33505312 | 36.3911  |

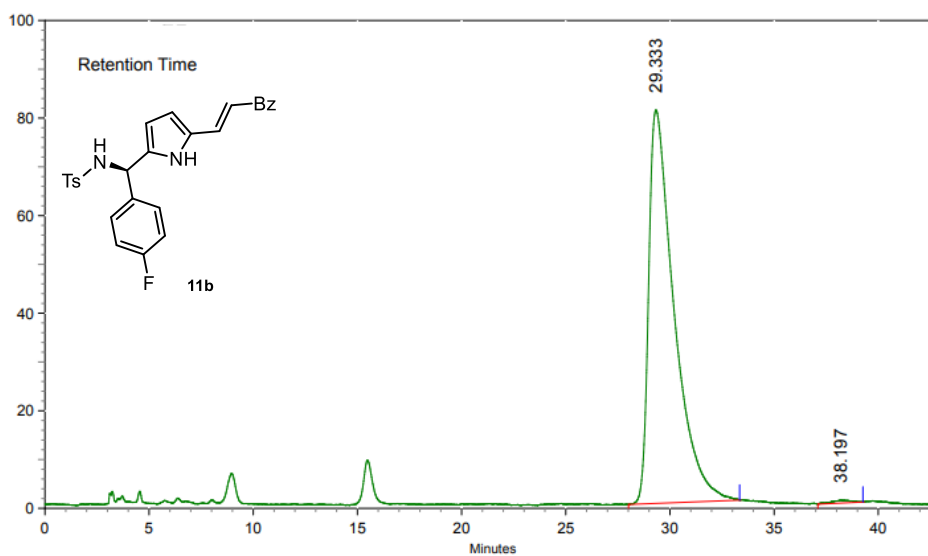

### AREA PERCENT REPORT

| Peak No. | Ret Time | Width | Height  | Area      | Area [%] |
|----------|----------|-------|---------|-----------|----------|
| 1        | 29.333   | 5.333 | 1352577 | 114406982 | 99.4295  |
| 2        | 38.197   | 2.163 | 10474   | 656434    | 0.5705   |



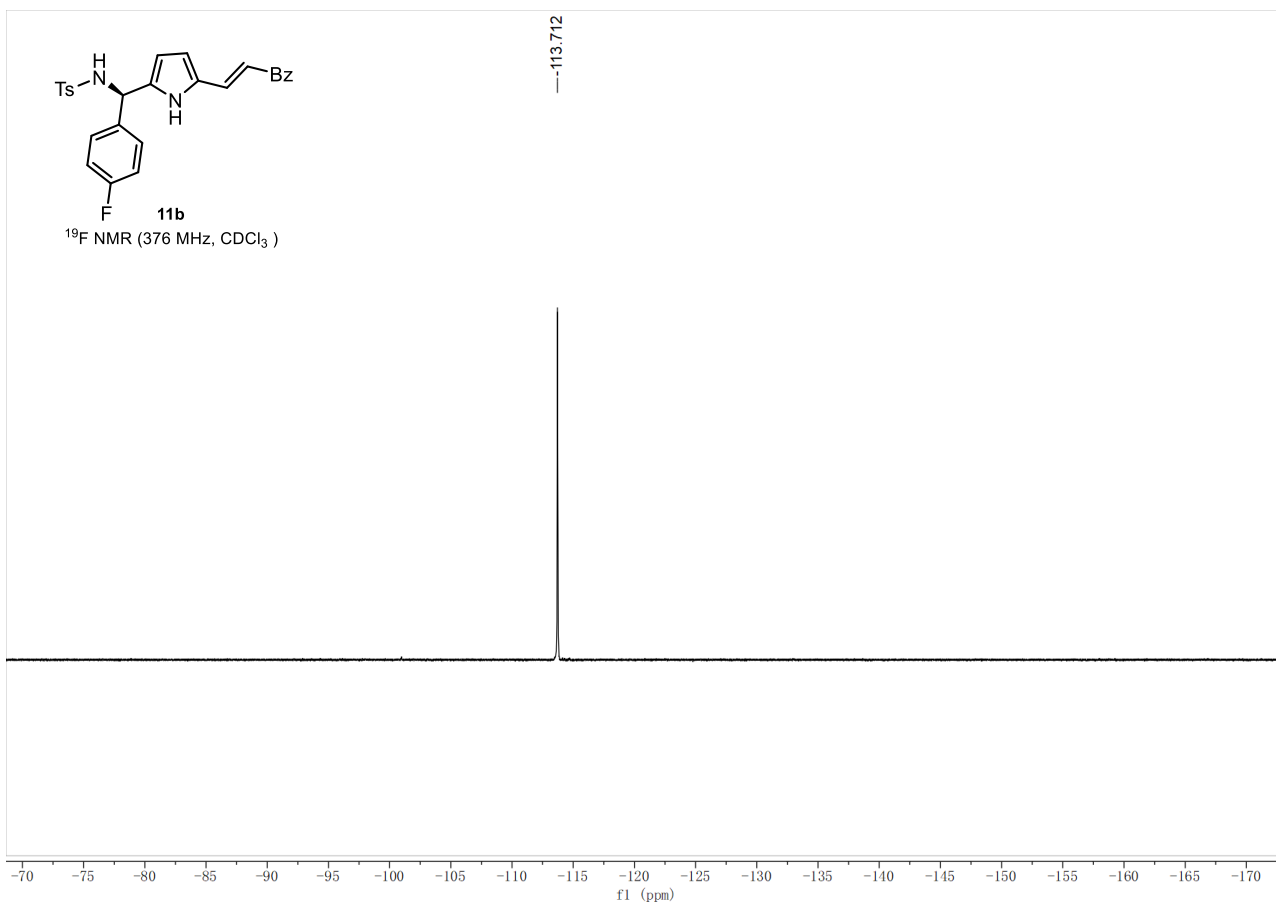

| Name           | CYC-20211129-58   | Rack Pos.    | Instrument     | Instrument 1 | Operator                                           |
|----------------|-------------------|--------------|----------------|--------------|----------------------------------------------------|
| Inj. Vol. (ul) | 8                 | Plate Pos.   | IRM Status     | Success      |                                                    |
| Data File      | CYC-20211129-58.d | Method (Acq) | ZYJ-20201106.m | Comment      | Acq. Time (Local) 12/1/2021 6:30:41 PM (UTC+08:00) |

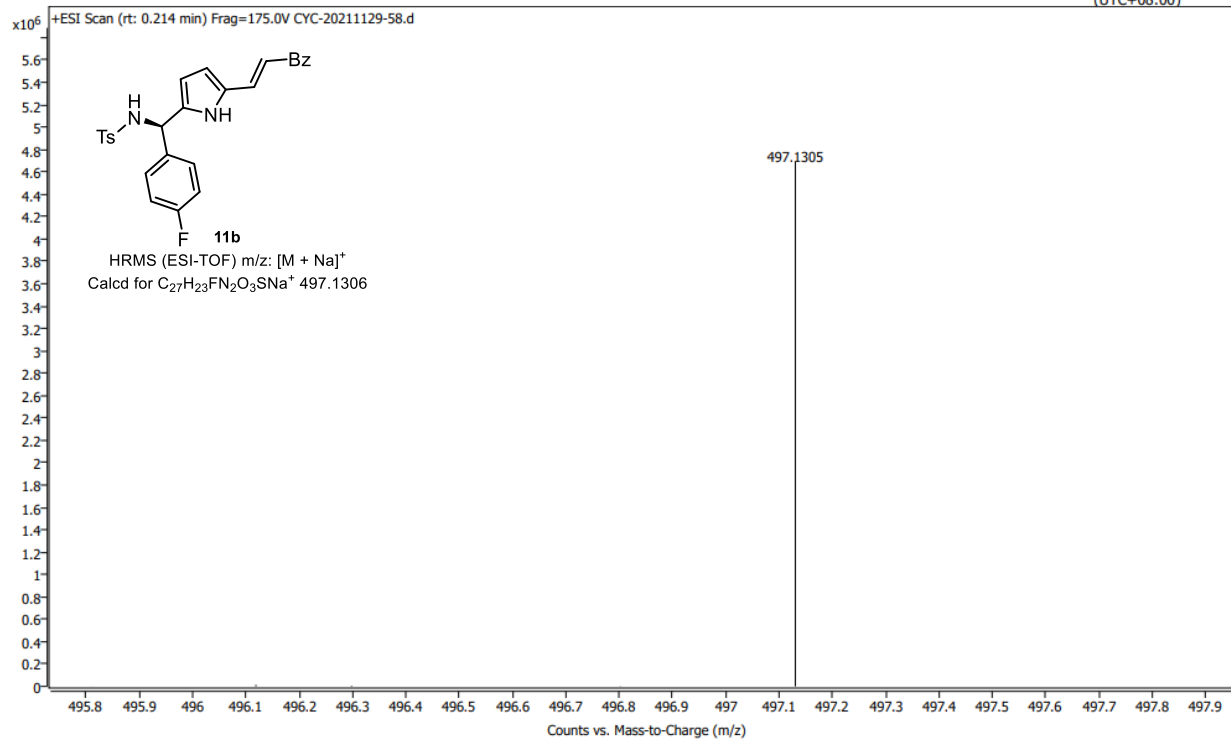

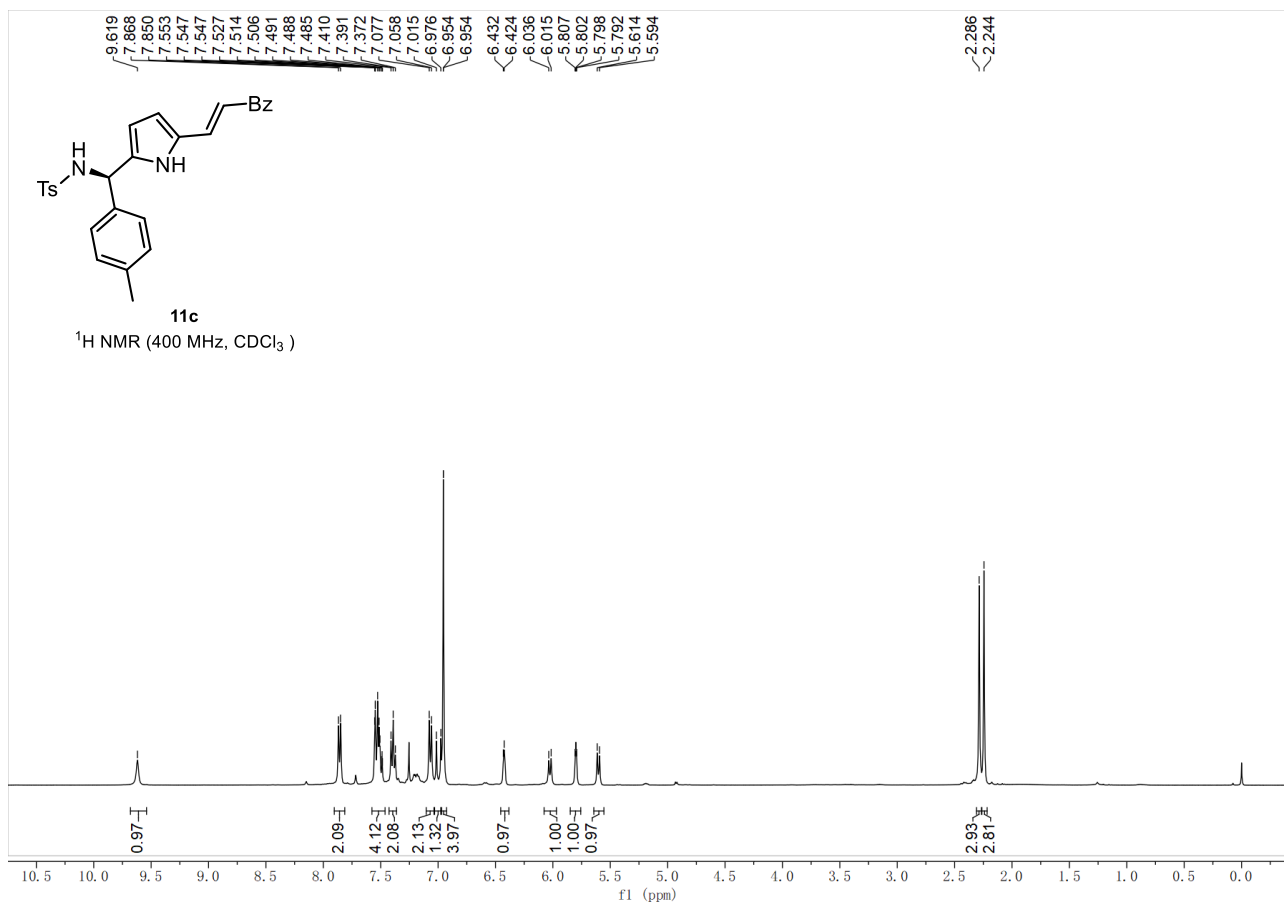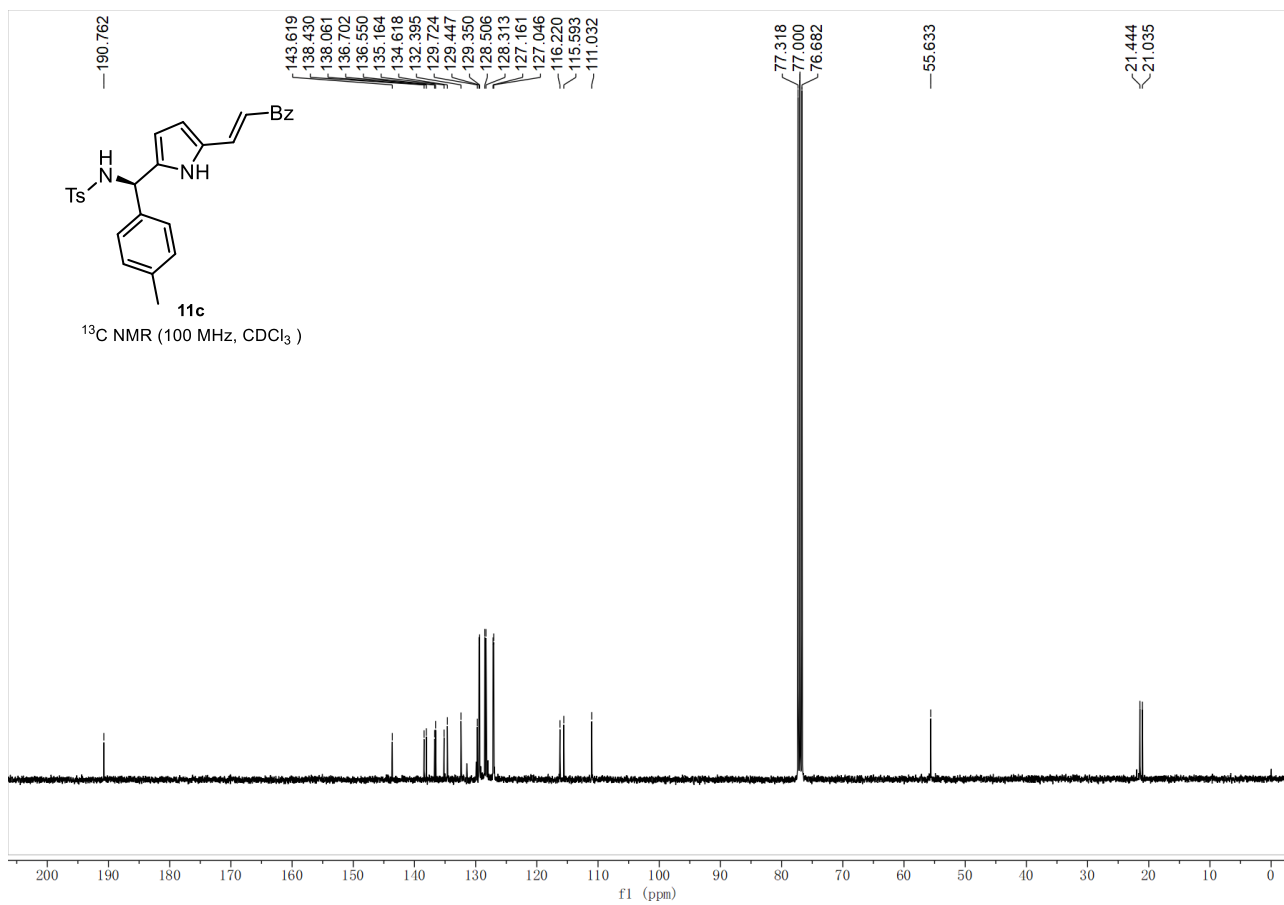

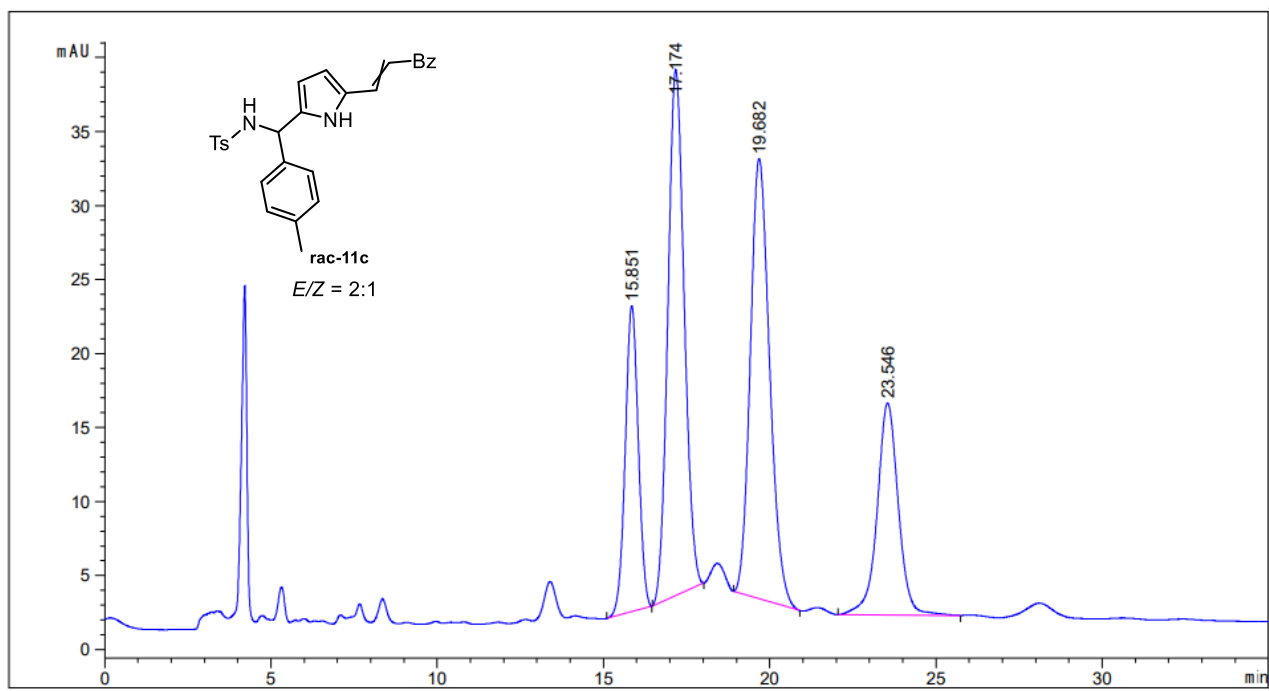

| # | [min]  | [min] | [mAU*s] | [mAU]      | %        |         |
|---|--------|-------|---------|------------|----------|---------|
| 1 | 15.851 | BB    | 0.4177  | 562.23639  | 20.67464 | 15.5810 |
| 2 | 17.174 | BBA   | 0.5294  | 1213.41089 | 35.53400 | 33.6268 |
| 3 | 19.682 | BB    | 0.6158  | 1199.03784 | 29.75334 | 33.2285 |
| 4 | 23.546 | BB    | 0.6689  | 633.77832  | 14.32913 | 17.5637 |

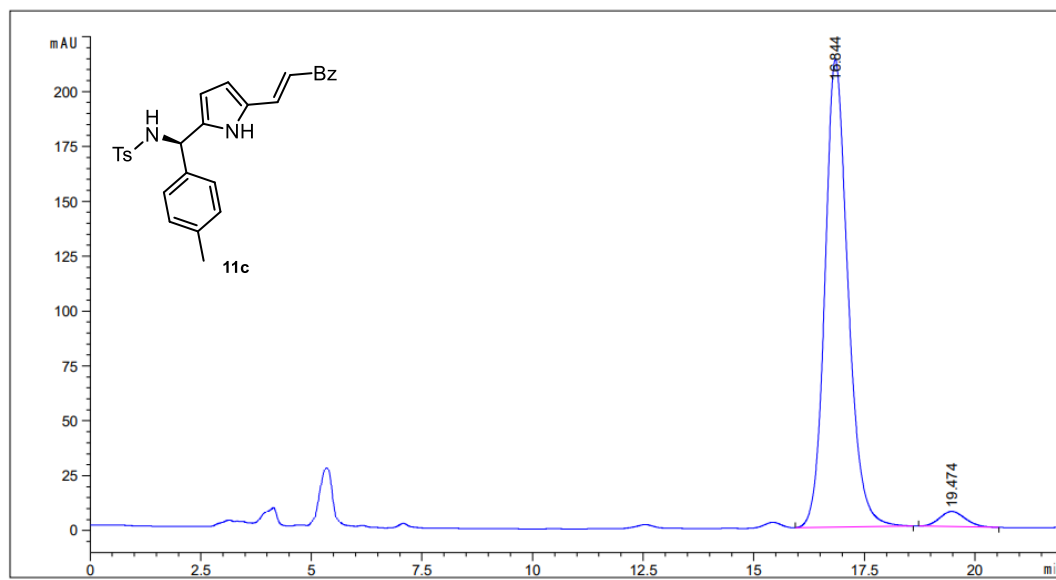

| # | [min]  | [min] | [mAU*s] | [mAU]      | %         |         |
|---|--------|-------|---------|------------|-----------|---------|
| 1 | 16.844 | BB    | 0.5492  | 7718.96436 | 213.11310 | 96.4754 |
| 2 | 19.474 | BB    | 0.6251  | 281.99893  | 6.94596   | 3.5246  |

| Name           | CYC-20211129-60   | Rack Pos.    | Instrument     | Instrument 1 | Operator                                           |
|----------------|-------------------|--------------|----------------|--------------|----------------------------------------------------|
| Inj. Vol. (ul) | 8                 | Plate Pos.   | IRM Status     | Success      |                                                    |
| Data File      | CYC-20211129-60.d | Method (Acq) | ZYJ-20201106.m | Comment      | Acq. Time (Local) 12/1/2021 6:36:35 PM (UTC+08:00) |

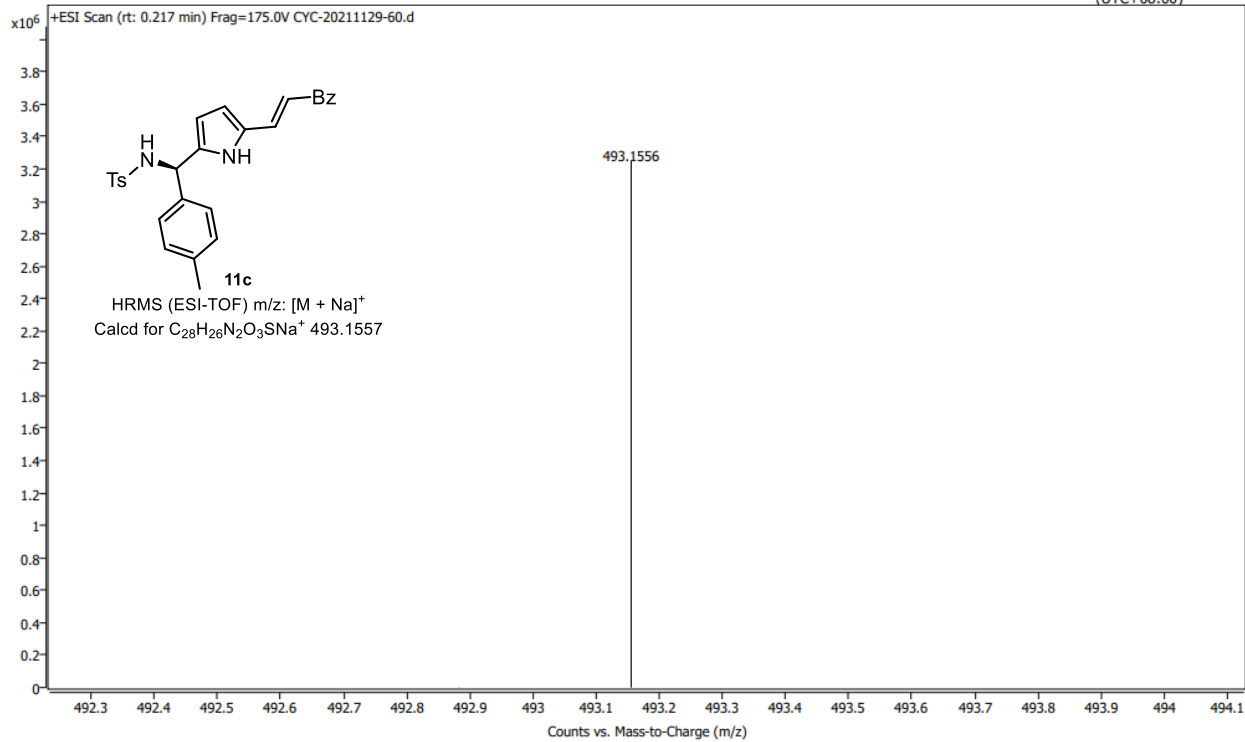

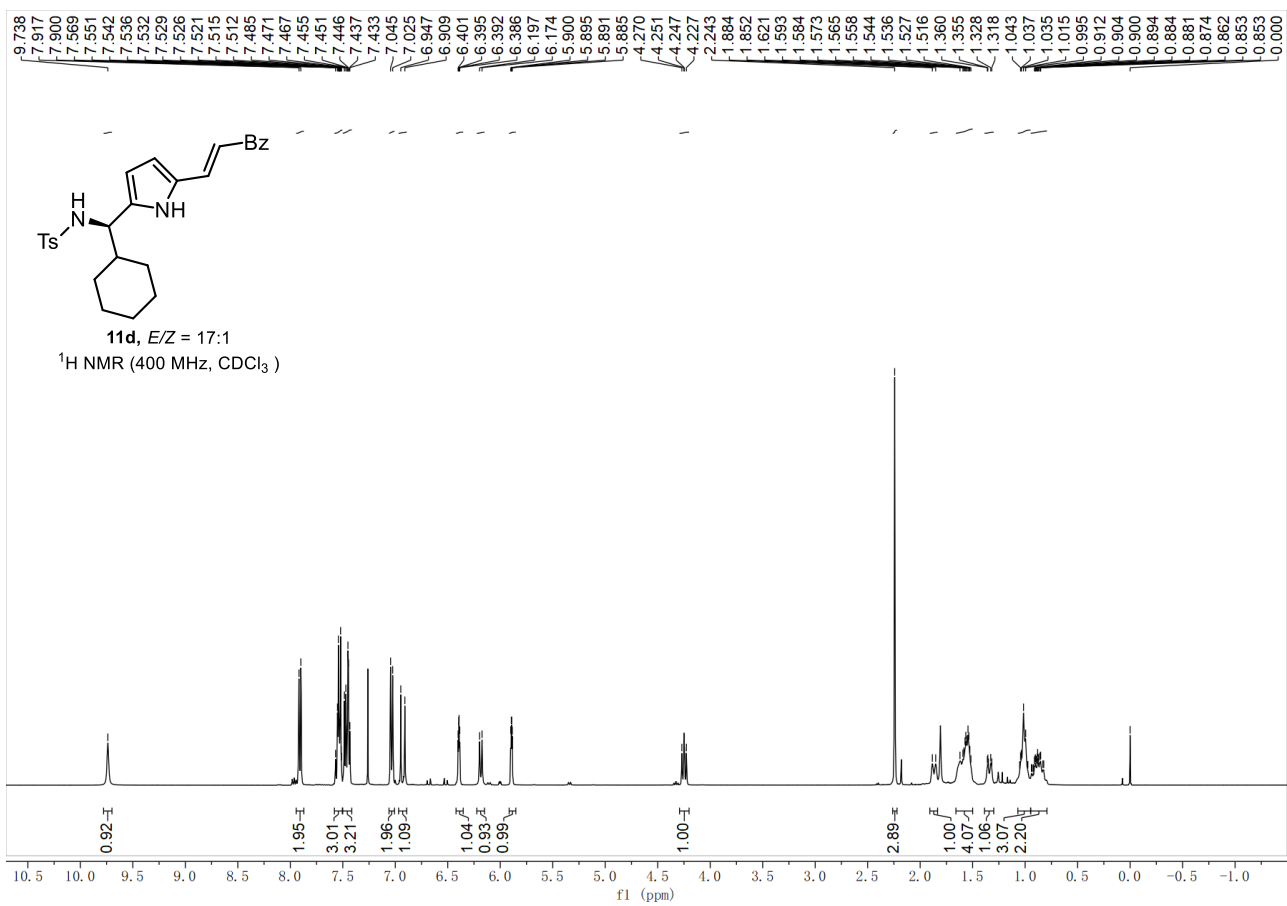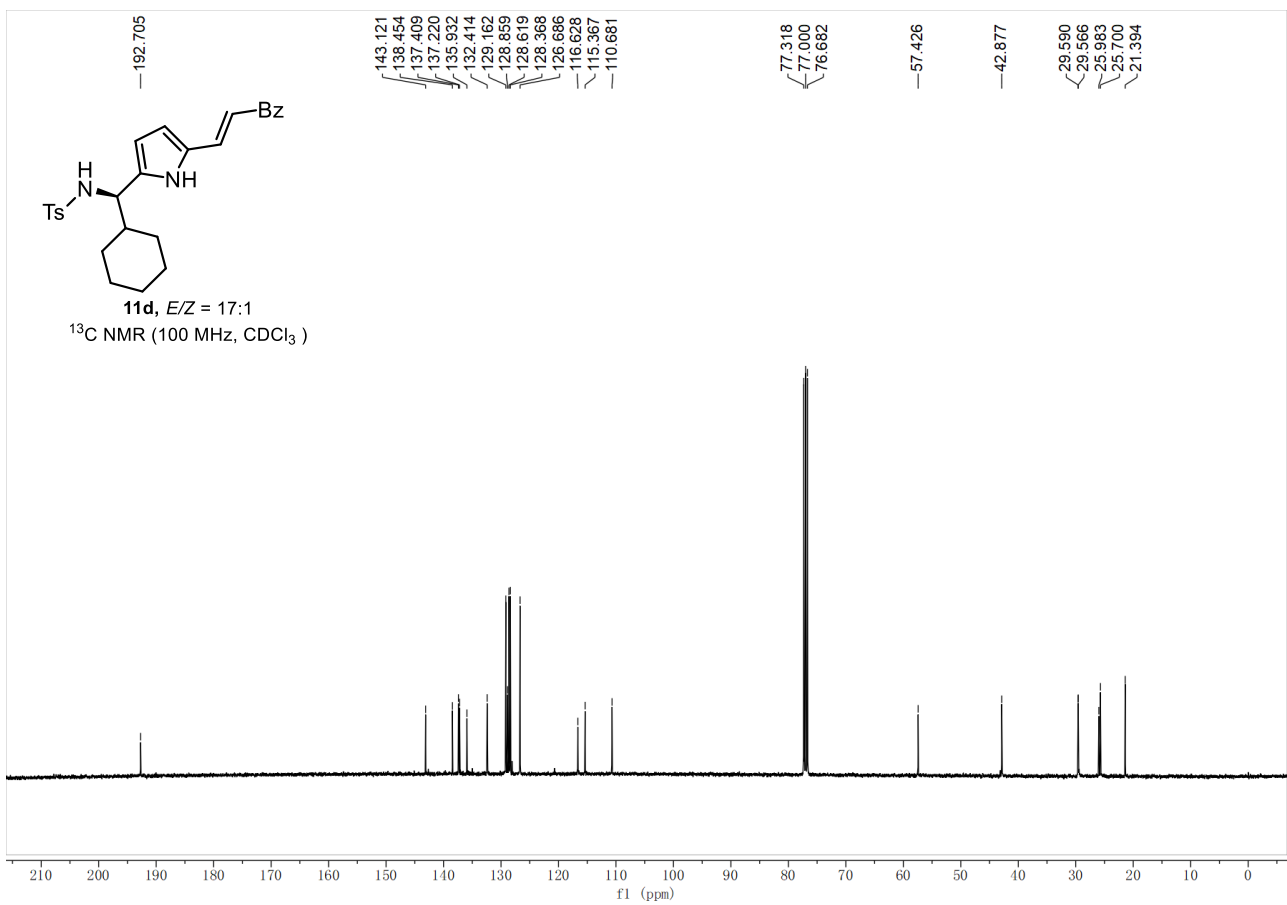

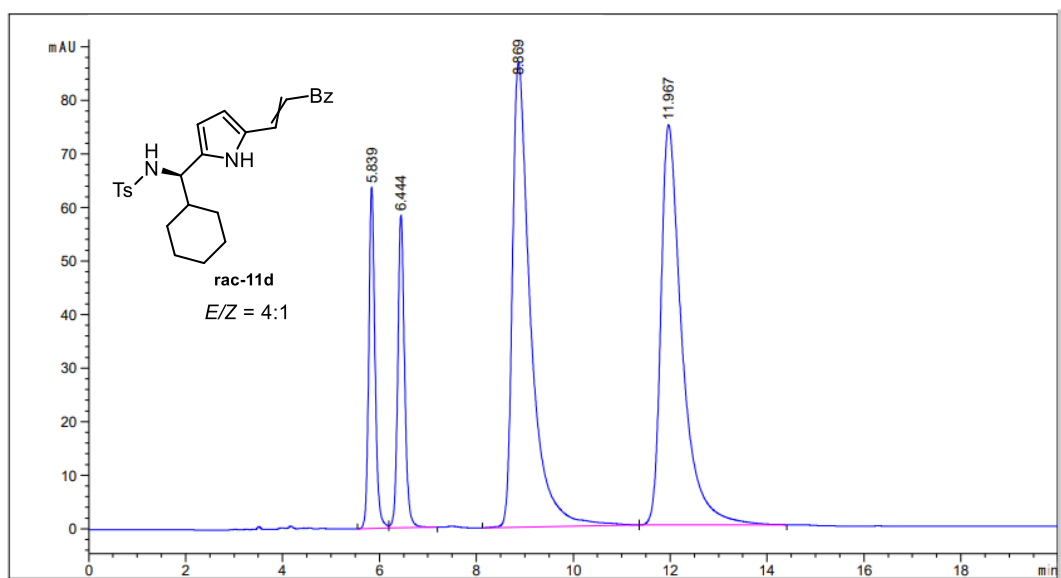

| # | [min]  | [min] | [mAU*s] | [mAU]      | %        |         |
|---|--------|-------|---------|------------|----------|---------|
| 1 | 5.839  | BV    | 0.1341  | 565.35107  | 63.68229 | 9.9761  |
| 2 | 6.444  | VB    | 0.1487  | 569.52203  | 58.40378 | 10.0497 |
| 3 | 8.869  | BB    | 0.3824  | 2271.32837 | 86.81559 | 40.0794 |
| 4 | 11.967 | BB    | 0.4461  | 2260.86426 | 74.74084 | 39.8948 |

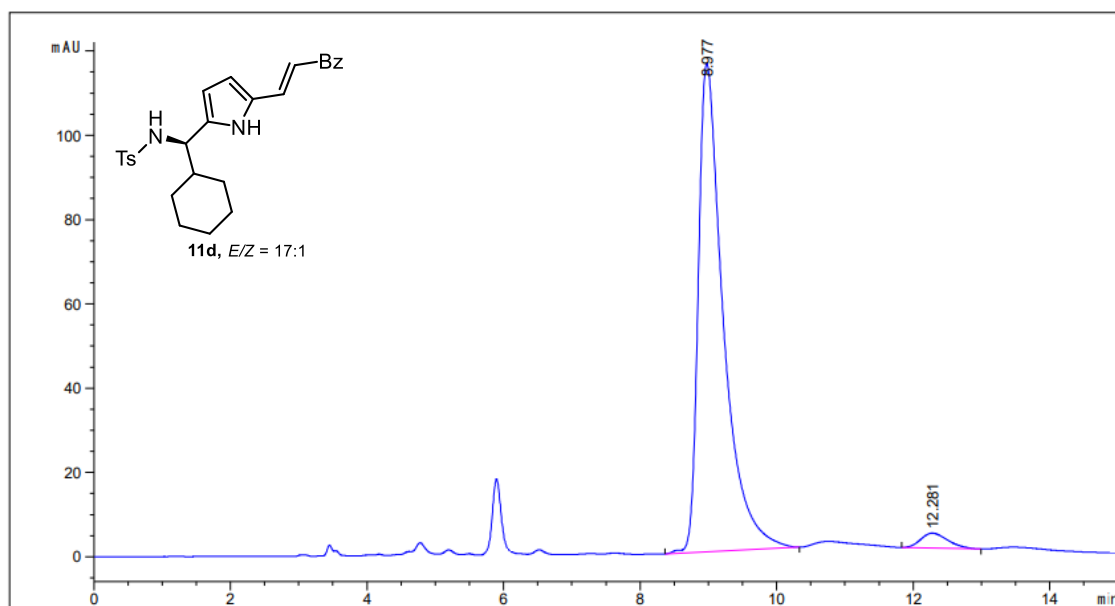

| # | [min]  | [min] | [mAU*s] | [mAU]      | %         |         |
|---|--------|-------|---------|------------|-----------|---------|
| 1 | 8.977  | BB    | 0.3742  | 2949.18115 | 115.84160 | 96.7727 |
| 2 | 12.281 | BB    | 0.4181  | 98.35177   | 3.54715   | 3.2273  |

|                |                   |              |                |            |              |                   |                                  |
|----------------|-------------------|--------------|----------------|------------|--------------|-------------------|----------------------------------|
| Name           | CYC-20211129-56   | Rack Pos.    |                | Instrument | Instrument 1 | Operator          |                                  |
| Inj. Vol. (ul) | 8                 | Plate Pos.   |                | IRM Status | Success      |                   |                                  |
| Data File      | CYC-20211129-56.d | Method (Acq) | ZYJ-20201106.m | Comment    |              | Acq. Time (Local) | 12/1/2021 6:24:48 PM (UTC+08:00) |

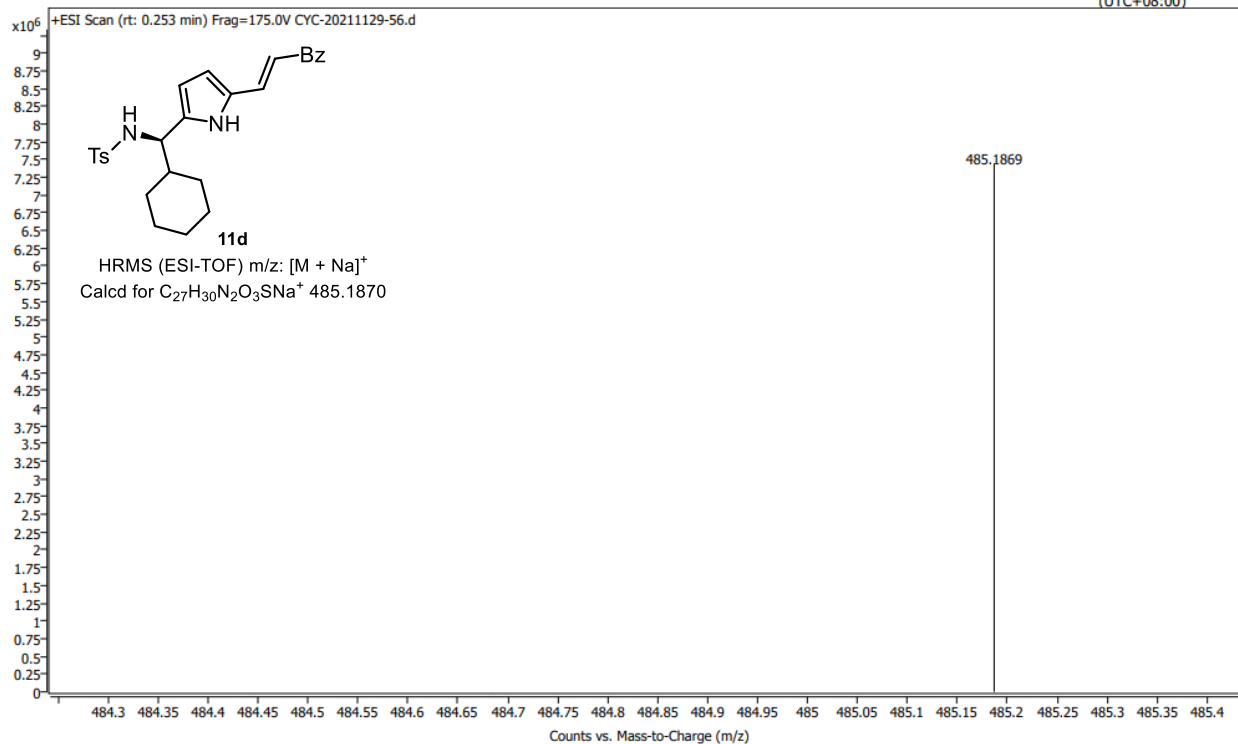

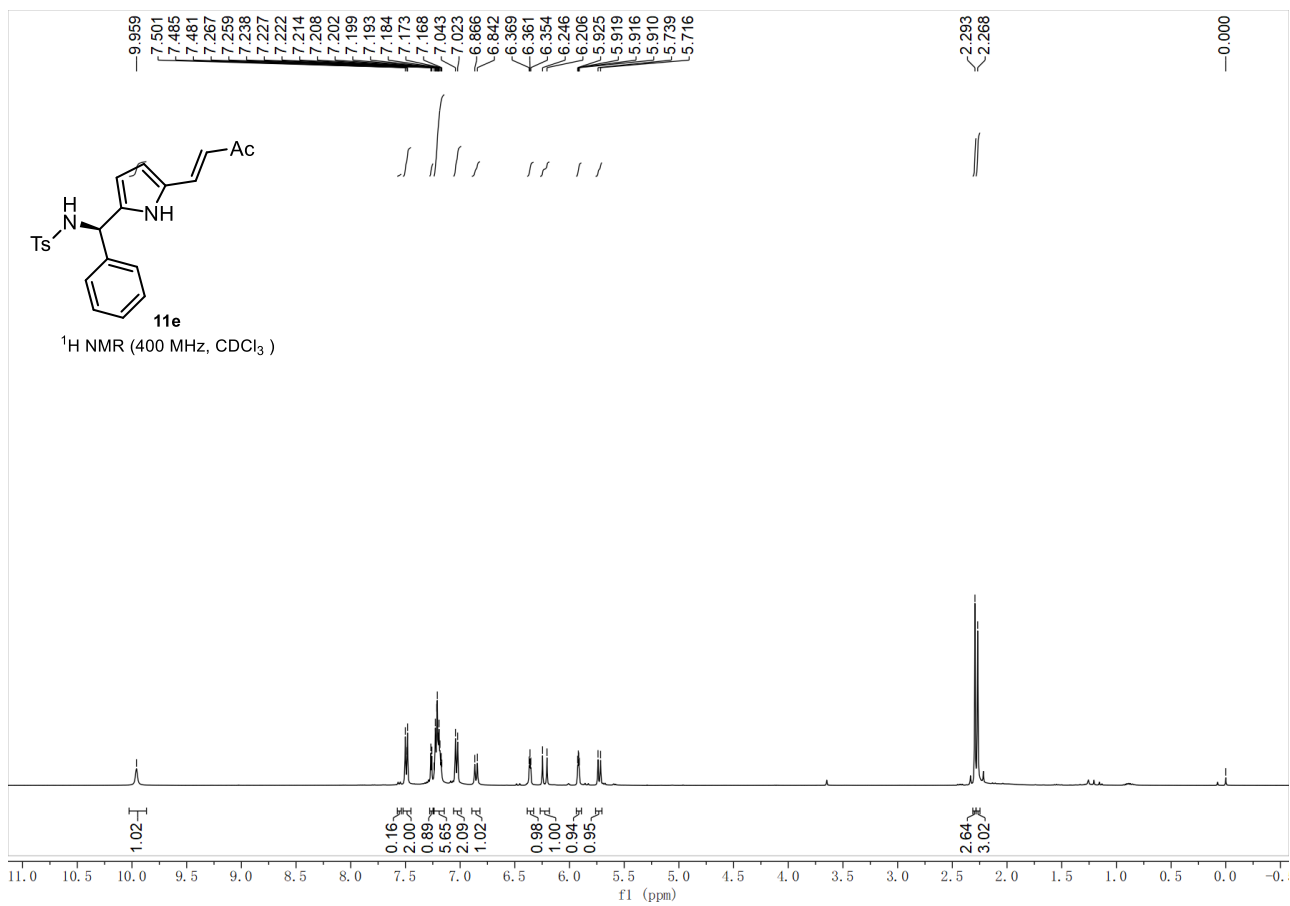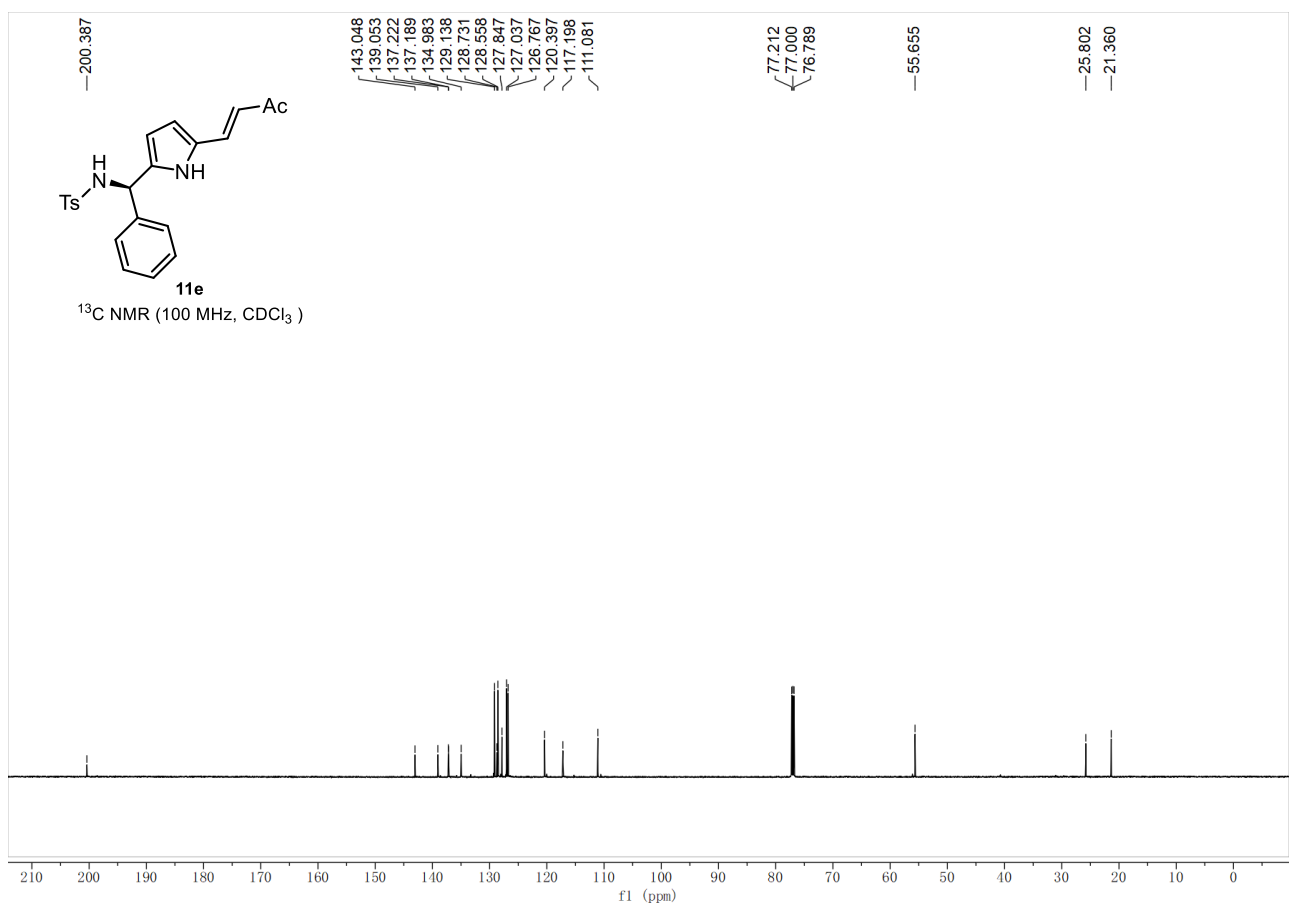



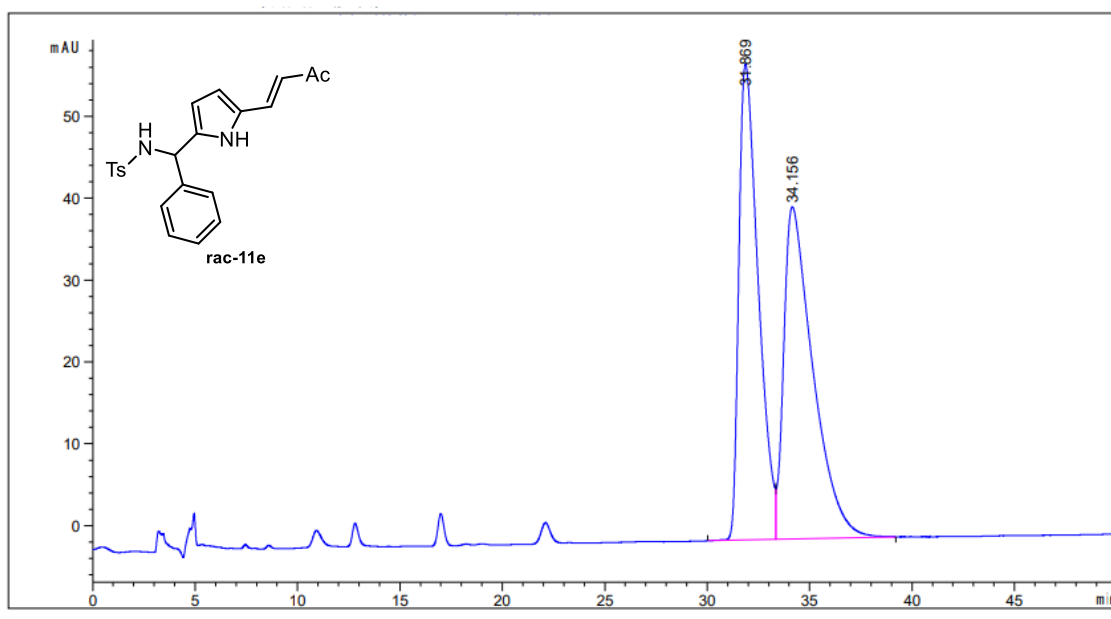

| # | [min]     | [min]  | [mAU*s]    | [mAU]    | %       |
|---|-----------|--------|------------|----------|---------|
| 1 | 31.869 BV | 0.9920 | 3823.67993 | 58.10288 | 48.7311 |
| 2 | 34.156 VB | 1.4276 | 4022.80835 | 40.57302 | 51.2689 |

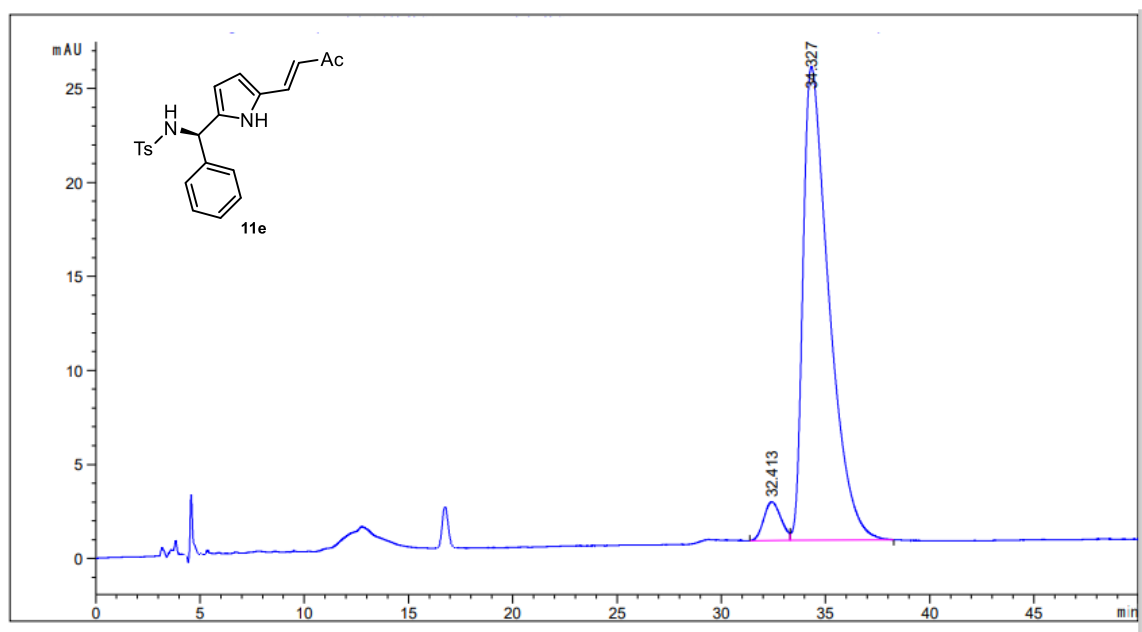

| # | [min]     | [min]  | [mAU*s]    | [mAU]    | %       |
|---|-----------|--------|------------|----------|---------|
| 1 | 32.413 BV | 0.7532 | 118.07346  | 2.05979  | 5.1363  |
| 2 | 34.327 VB | 1.2716 | 2180.74023 | 25.20245 | 94.8637 |

|                |                   |              |                |            |                  |                                  |
|----------------|-------------------|--------------|----------------|------------|------------------|----------------------------------|
| Name           | CYC-20211129-55   | Rack Pos.    |                | Instrument | Instrument 1     | Operator                         |
| Inj. Vol. (ul) | 8                 | Plate Pos.   |                | IRM Status | Some ions missed |                                  |
| Data File      | CYC-20211129-55.d | Method (Acq) | ZYJ-20201106.m | Comment    |                  | Acq. Time (Local)                |
|                |                   |              |                |            |                  | 12/1/2021 6:21:49 PM (UTC+08:00) |

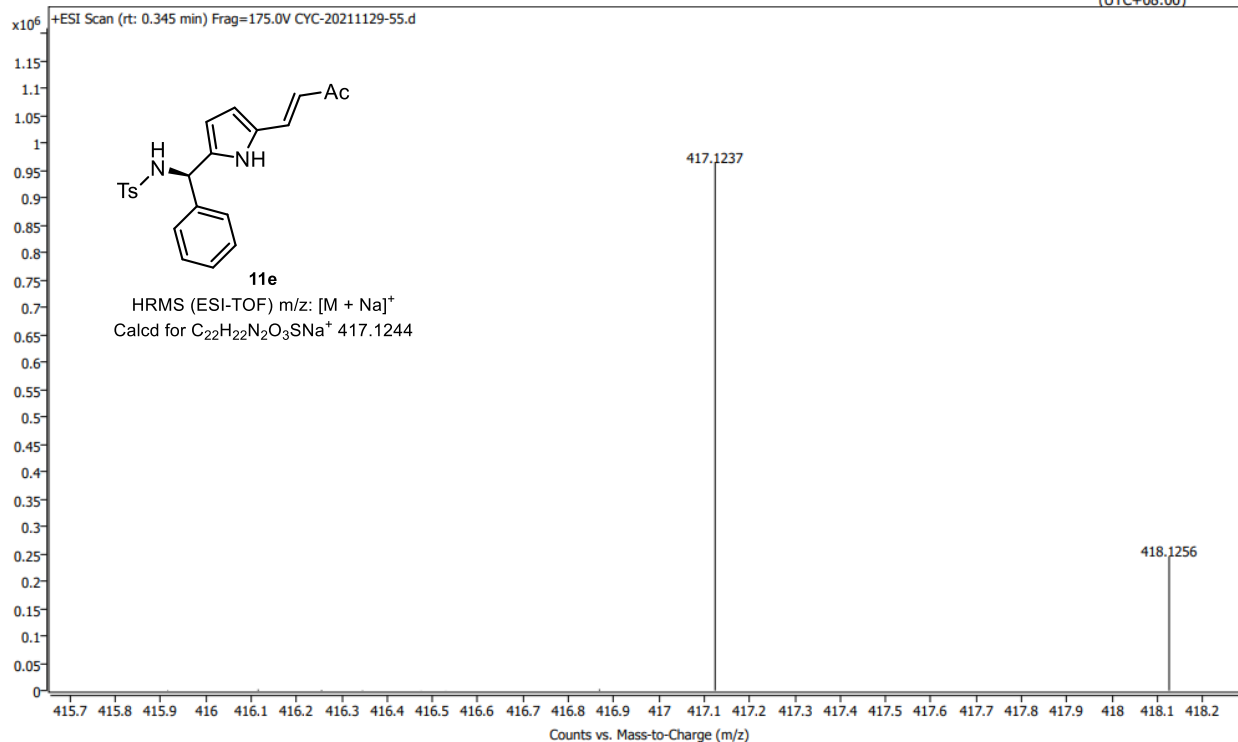

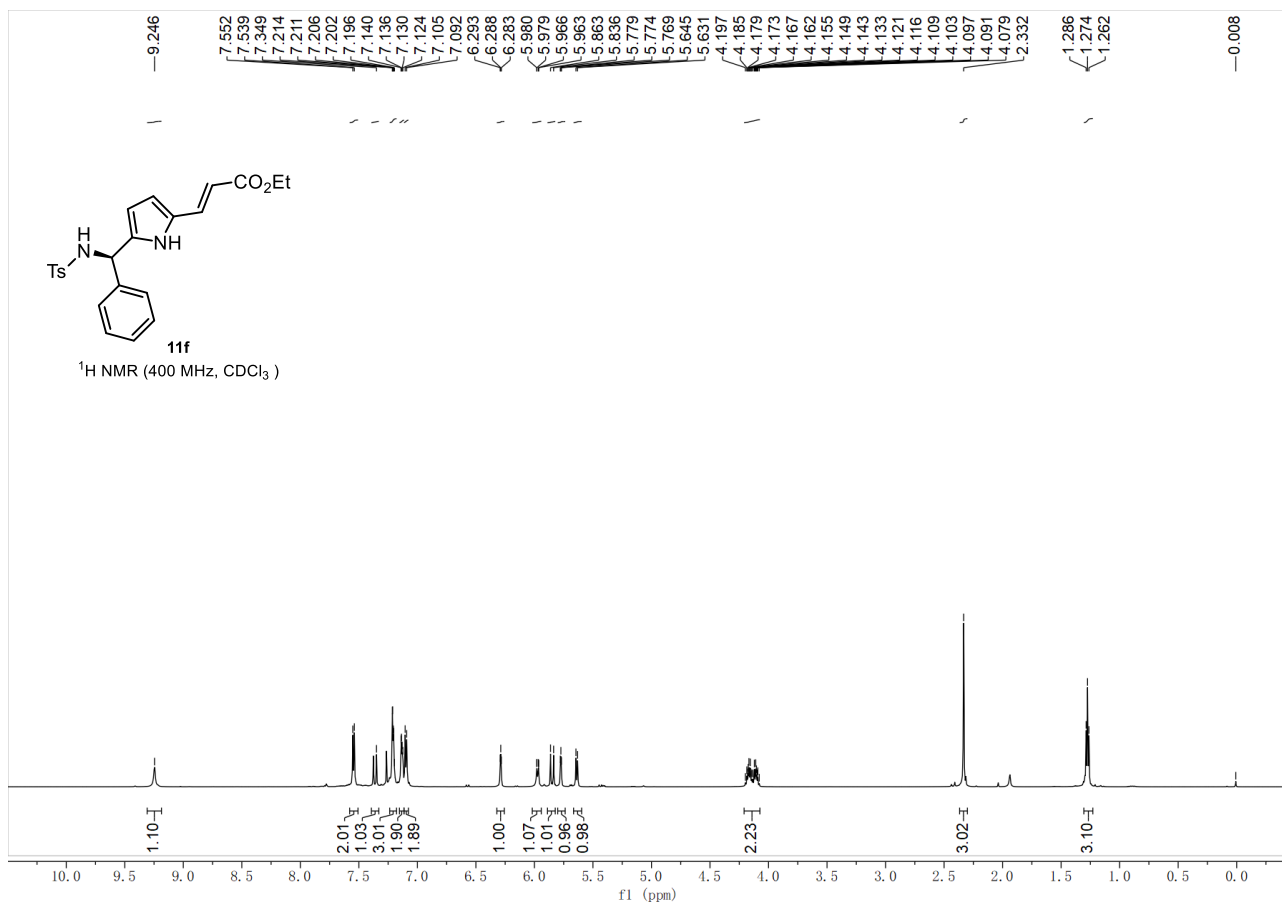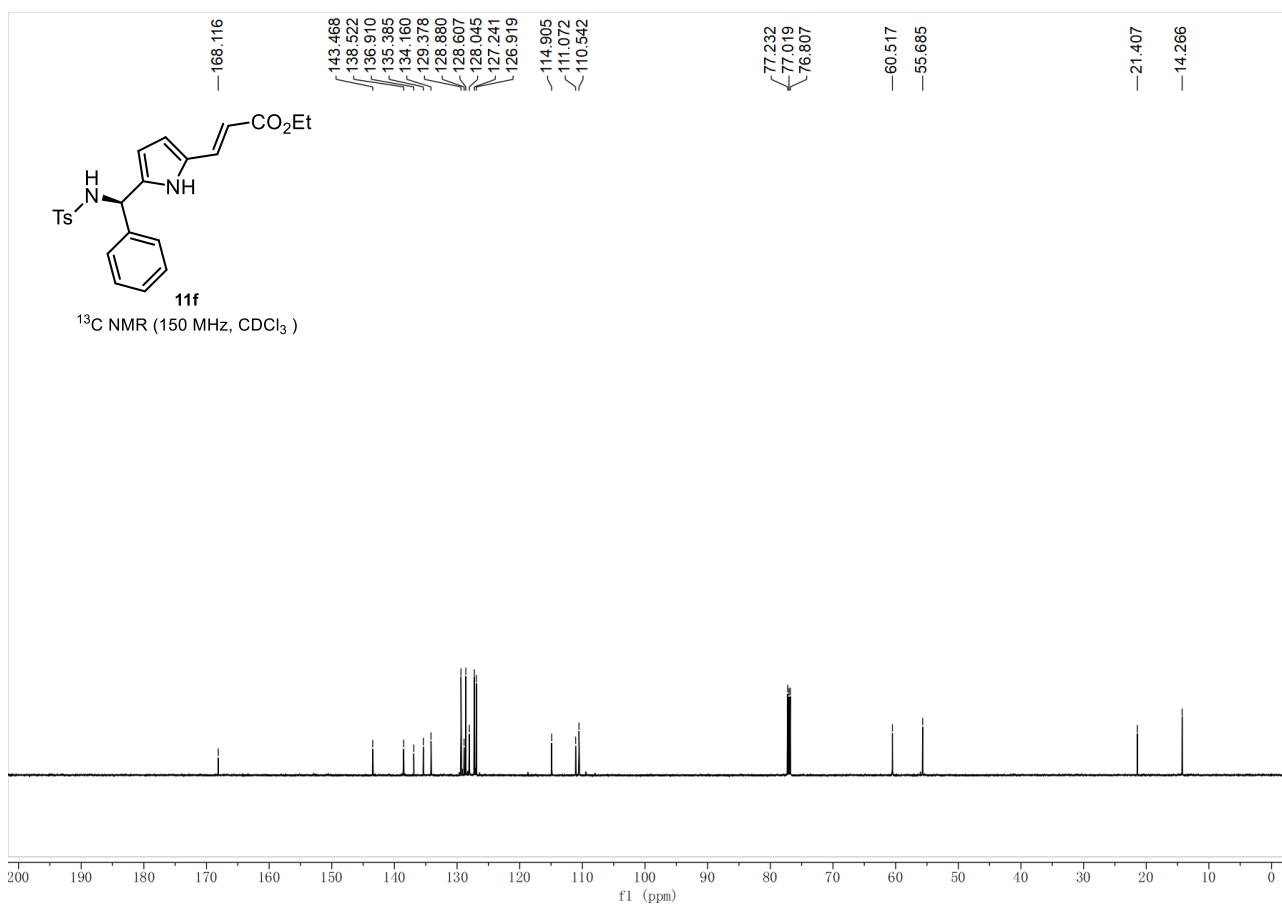

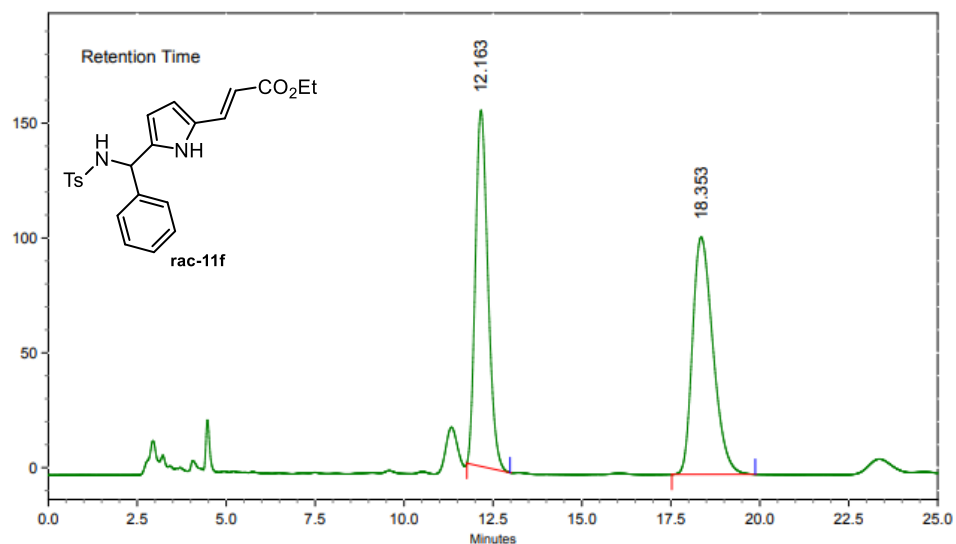

AREA PERCENT REPORT

| Peak No. | Ret Time | Width | Height  | Area     | Area [%] |
|----------|----------|-------|---------|----------|----------|
| 1        | 12.163   | 1.213 | 2600395 | 63666453 | 47.8414  |
| 2        | 18.353   | 2.347 | 1732438 | 69411745 | 52.1586  |

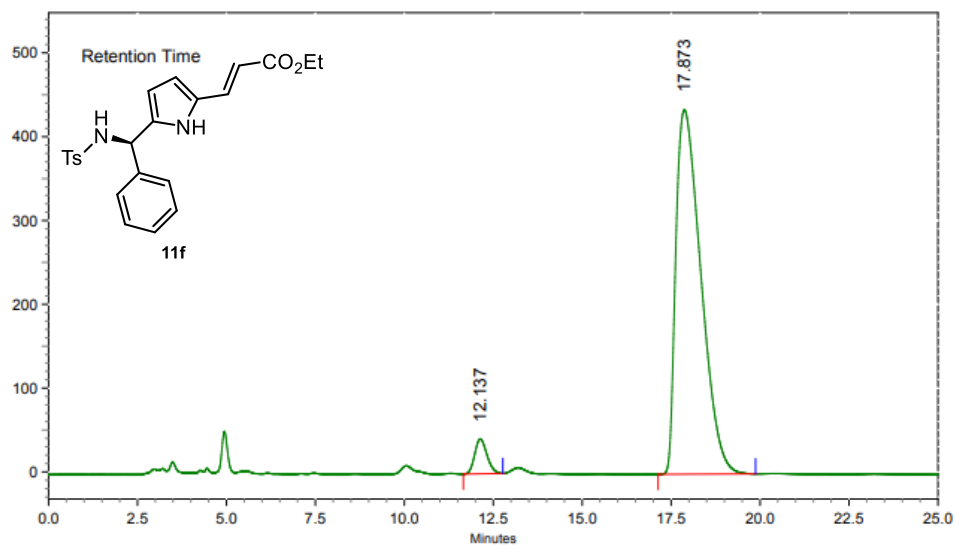

AREA PERCENT REPORT

| Peak No. | Ret Time | Width | Height  | Area      | Area [%] |
|----------|----------|-------|---------|-----------|----------|
| 1        | 12.137   | 1.110 | 698028  | 16745391  | 4.4855   |
| 2        | 17.873   | 2.740 | 7293626 | 356577069 | 95.5145  |

|                |                   |              |                |            |              |                   |                                  |
|----------------|-------------------|--------------|----------------|------------|--------------|-------------------|----------------------------------|
| Name           | CYC-20211129-54   | Rack Pos.    |                | Instrument | Instrument 1 | Operator          |                                  |
| Inj. Vol. (ul) | 8                 | Plate Pos.   |                | IRM Status | Success      |                   |                                  |
| Data File      | CYC-20211129-54.d | Method (Acq) | ZYJ-20201106.m | Comment    |              | Acq. Time (Local) | 12/1/2021 6:18:50 PM (UTC+08:00) |

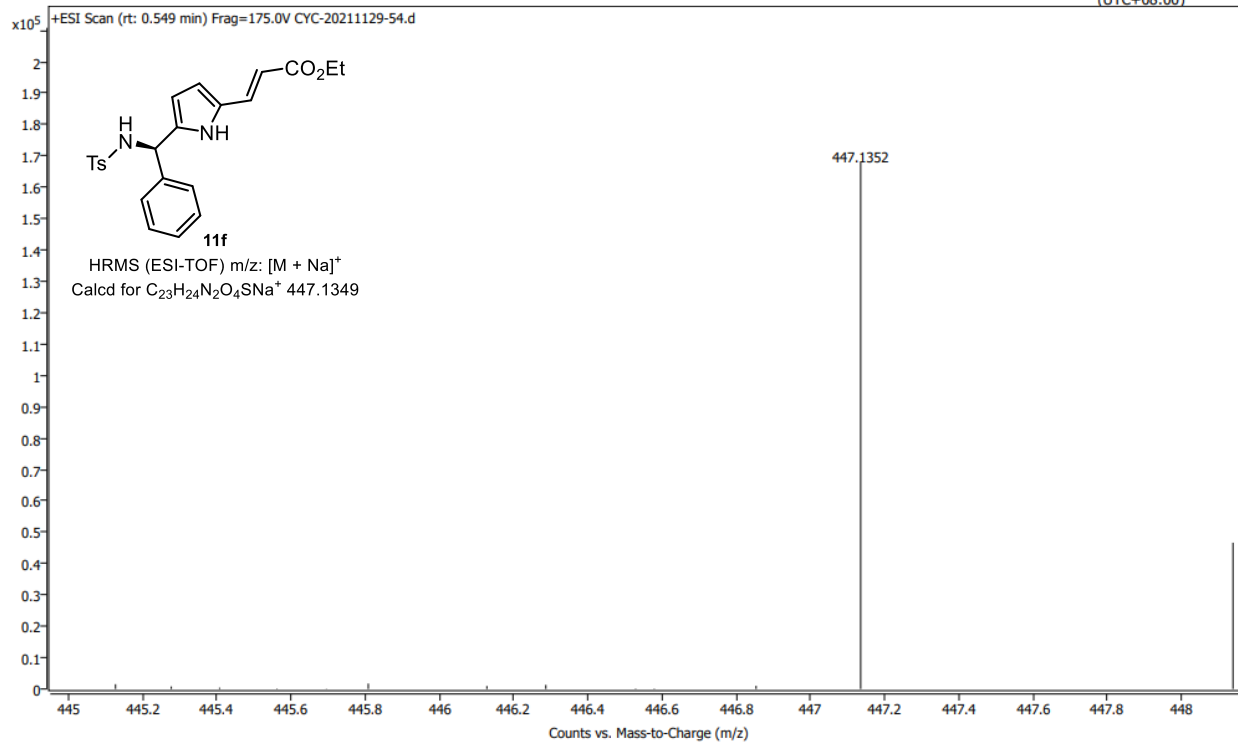

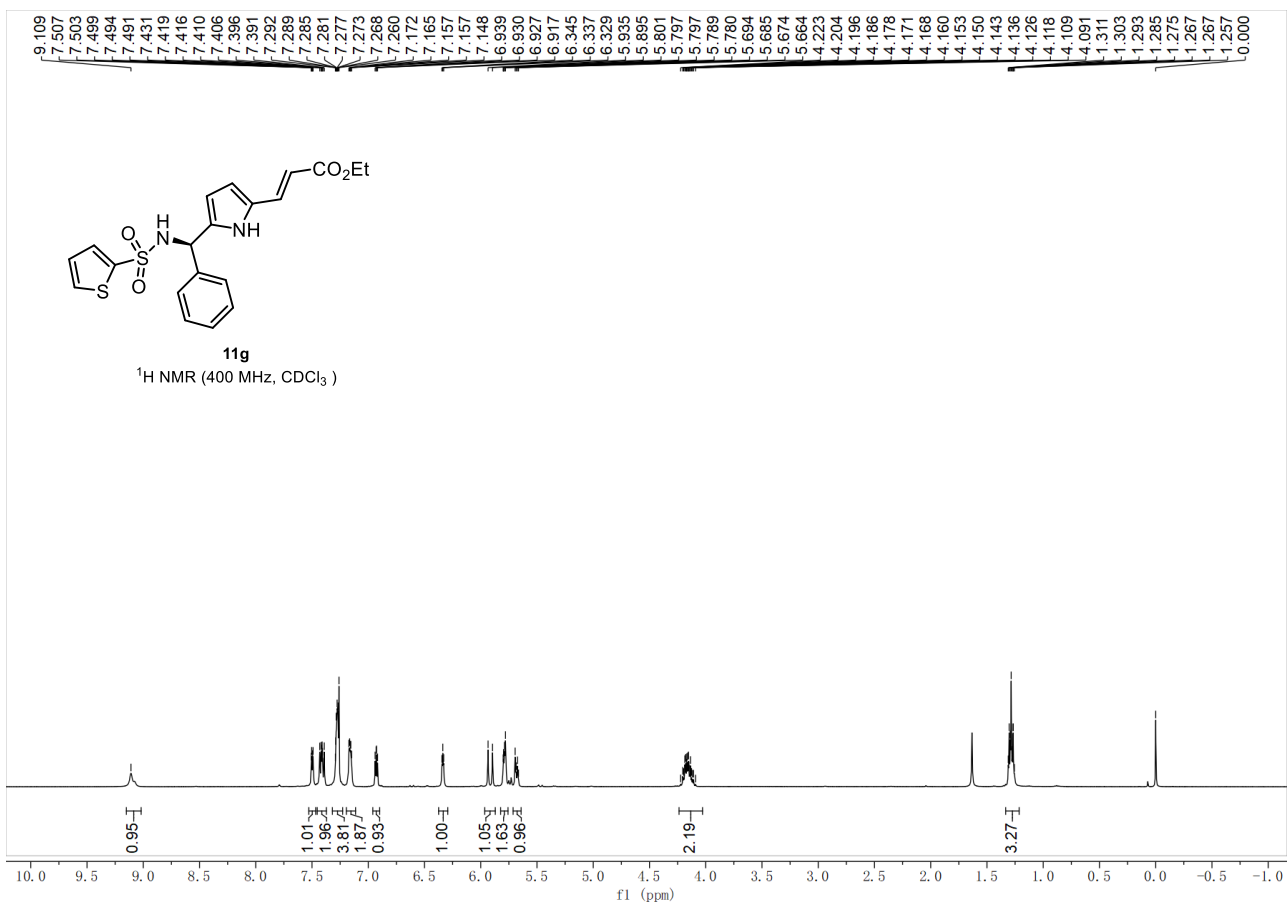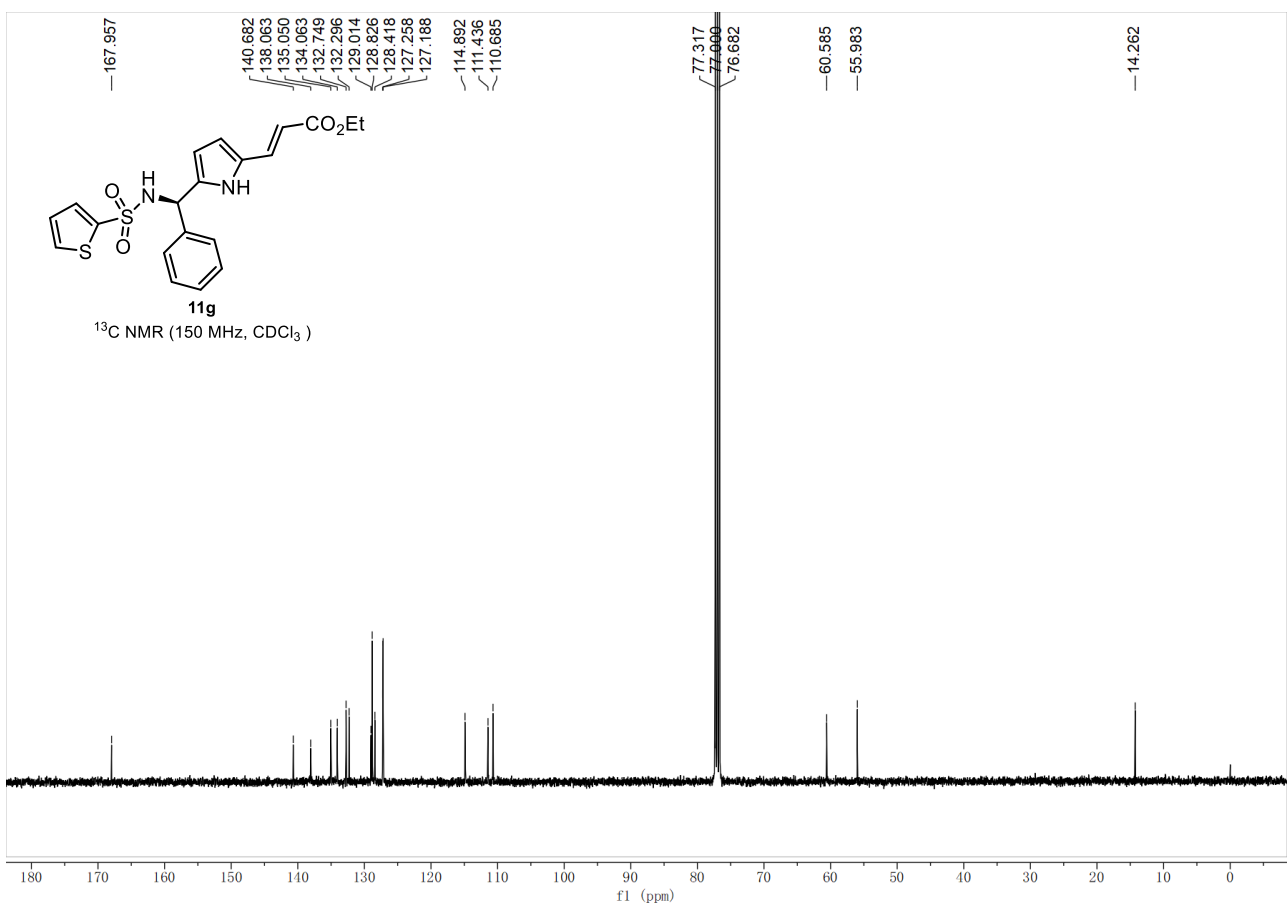

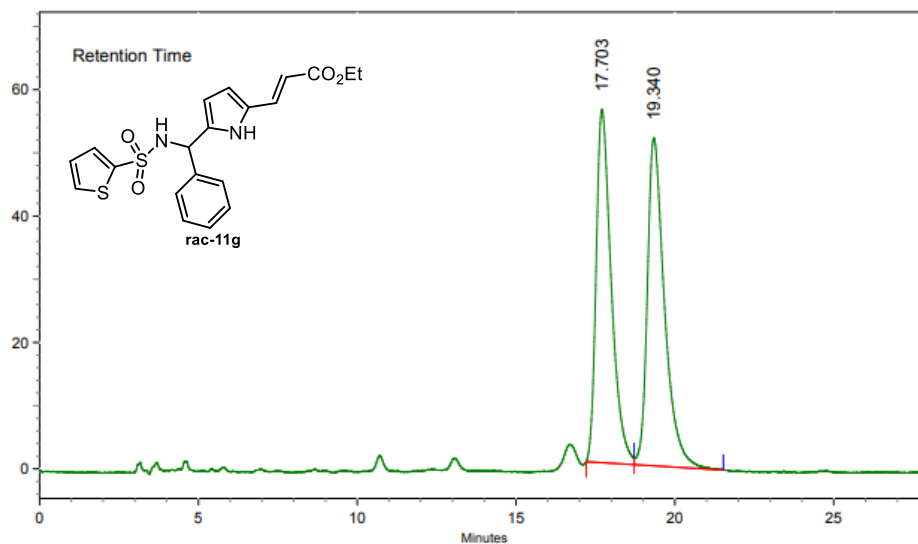

### AREA PERCENT REPORT

| Peak No. | Ret Time | Width | Height | Area     | Area [%] |
|----------|----------|-------|--------|----------|----------|
| 1        | 17.703   | 1.510 | 937768 | 30939886 | 48.6280  |
| 2        | 19.340   | 2.810 | 870344 | 32685829 | 51.3720  |

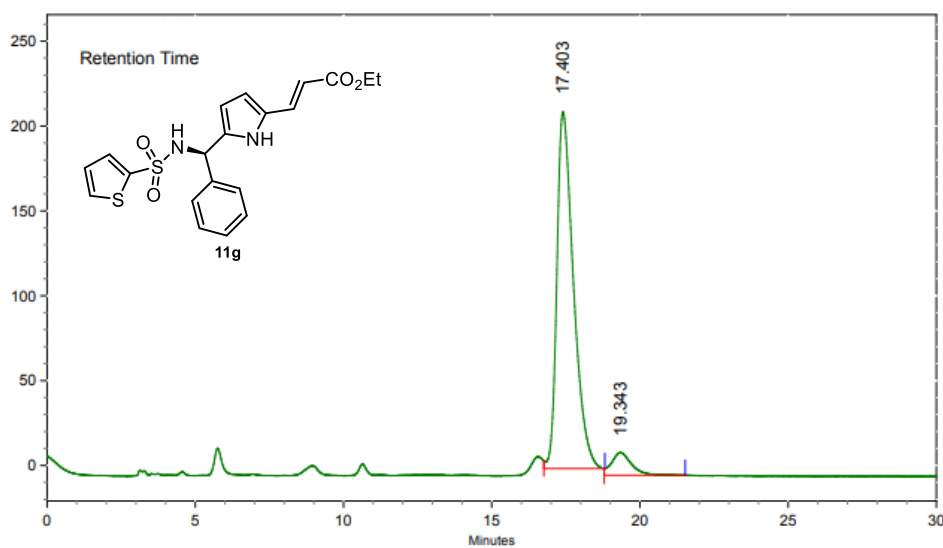

### AREA PERCENT REPORT

| Peak No. | Ret Time | Width | Height  | Area      | Area [%] |
|----------|----------|-------|---------|-----------|----------|
| 1        | 17.403   | 2.058 | 3525321 | 136808681 | 92.8331  |
| 2        | 19.343   | 2.733 | 223303  | 10561952  | 7.1669   |

|                |                   |              |                |            |                  |                   |                                  |
|----------------|-------------------|--------------|----------------|------------|------------------|-------------------|----------------------------------|
| Name           | CYC-20211129-57   | Rack Pos.    |                | Instrument | Instrument 1     | Operator          |                                  |
| Inj. Vol. (ul) | 8                 | Plate Pos.   |                | IRM Status | Some ions missed |                   |                                  |
| Data File      | CYC-20211129-57.d | Method (Acq) | ZYJ-20201106.m | Comment    |                  | Acq. Time (Local) | 12/1/2021 6:27:45 PM (UTC+08:00) |

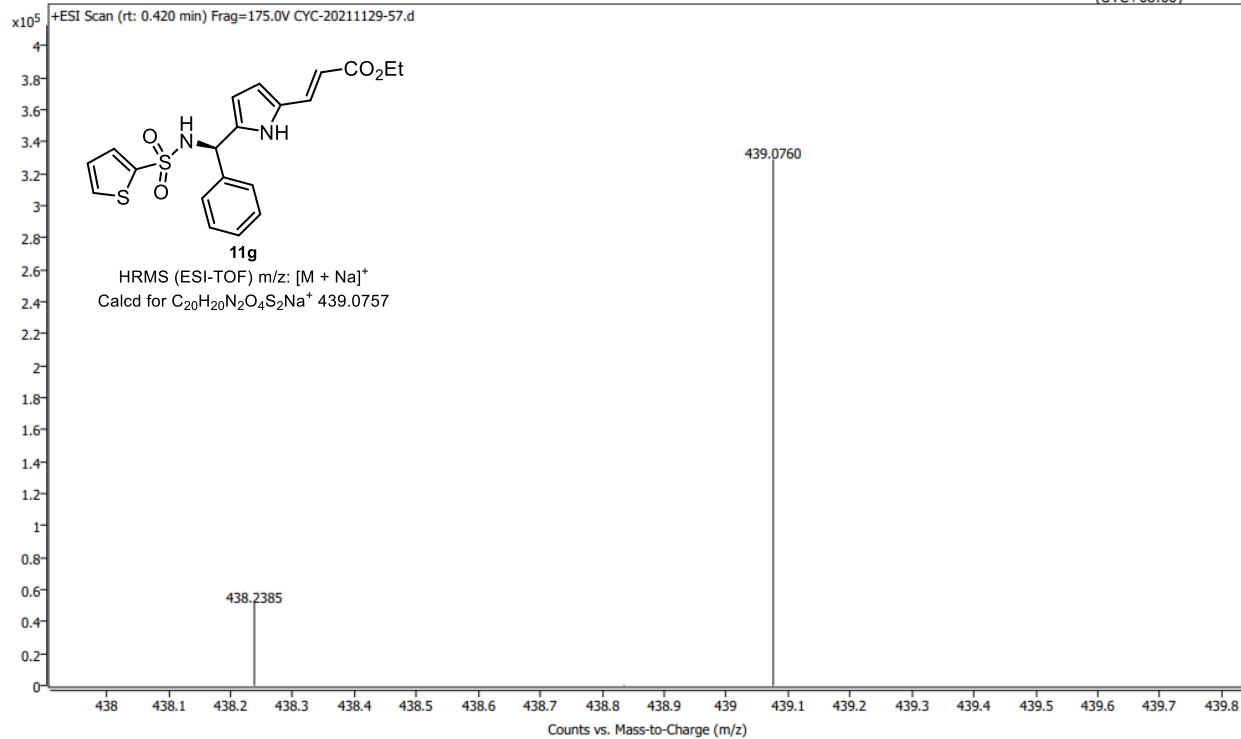



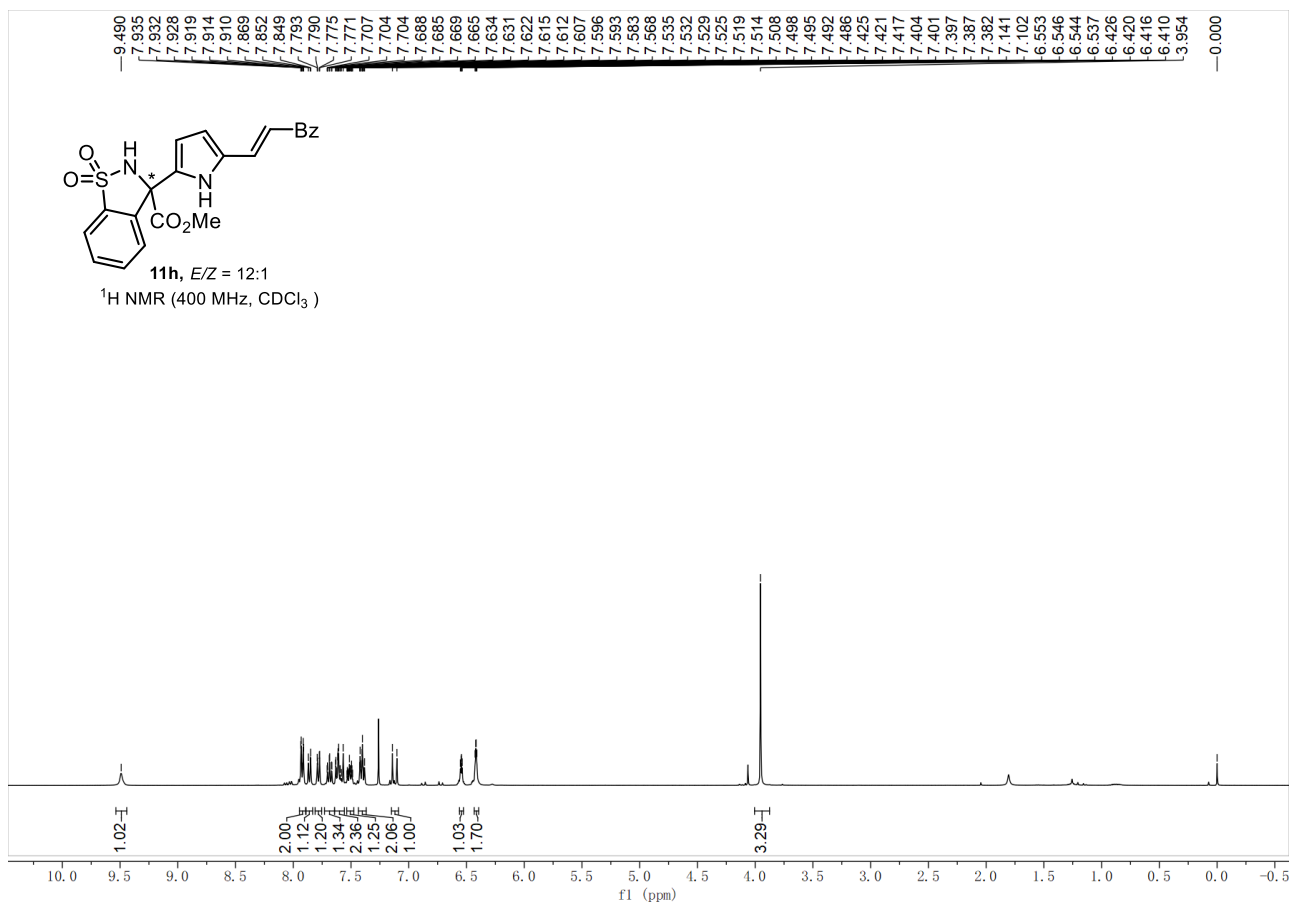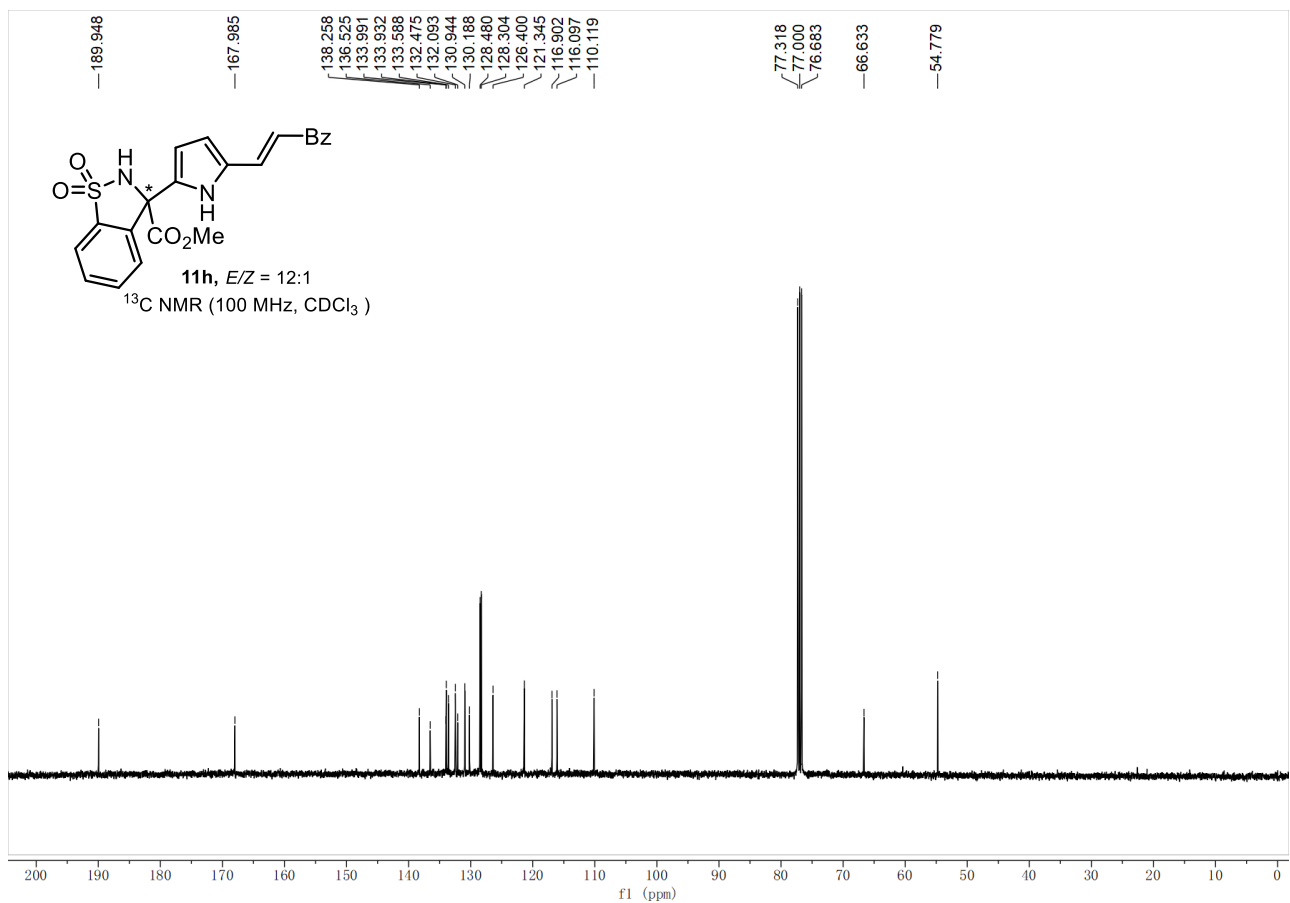

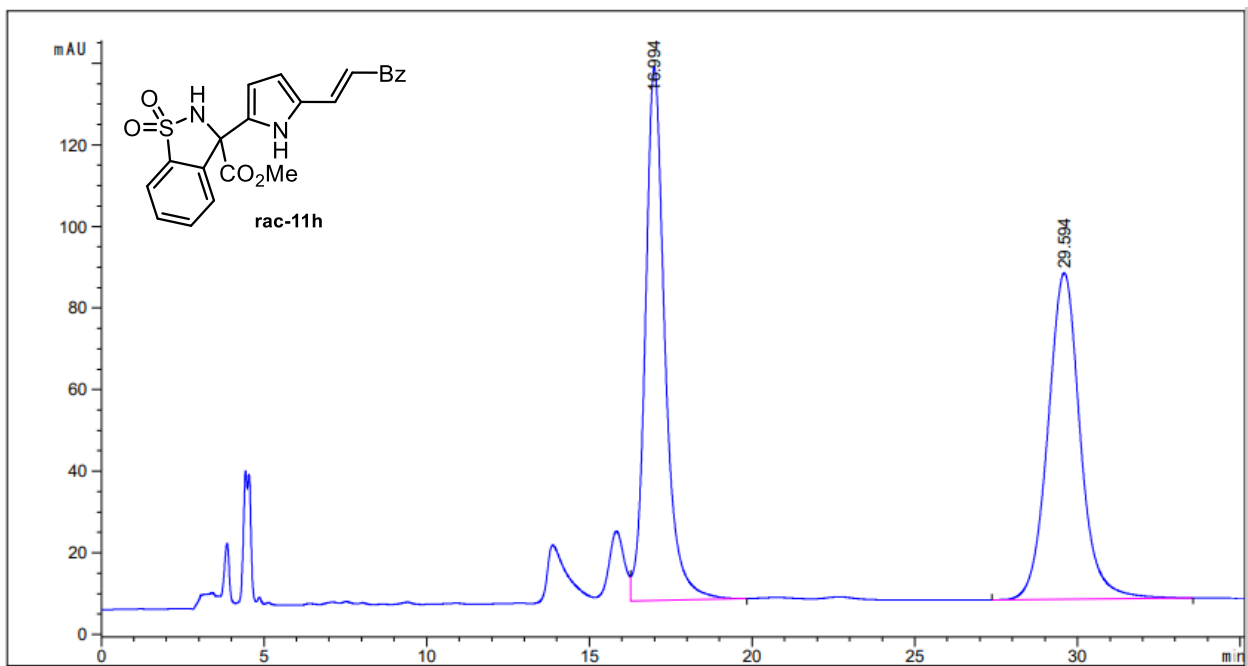

| # | [min]  | [min] | [min]  | [mAU*s]    | [mAU]     | %       |
|---|--------|-------|--------|------------|-----------|---------|
| 1 | 16.994 | VB    | 0.6286 | 5481.13477 | 130.80486 | 49.8597 |
| 2 | 29.594 | BB    | 1.0496 | 5511.98486 | 80.02951  | 50.1403 |

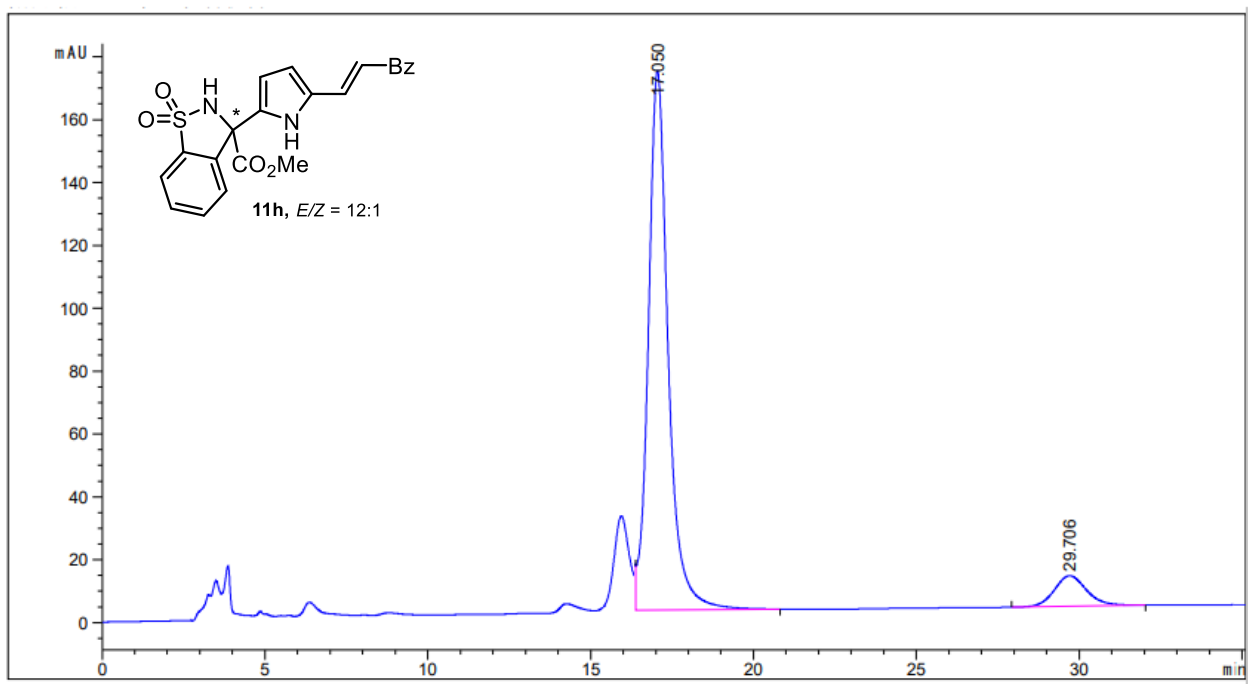

| # | [min]  | [min] | [min]  | [mAU*s]    | [mAU]     | %       |
|---|--------|-------|--------|------------|-----------|---------|
| 1 | 17.050 | VB    | 0.6324 | 7263.78516 | 171.52957 | 91.4431 |
| 2 | 29.706 | BB    | 1.0178 | 679.71722  | 9.75972   | 8.5569  |

|                |                   |              |                |            |              |                   |                                  |
|----------------|-------------------|--------------|----------------|------------|--------------|-------------------|----------------------------------|
| Name           | CYC-20211129-59   | Rack Pos.    |                | Instrument | Instrument 1 | Operator          |                                  |
| Inj. Vol. (ul) | 8                 | Plate Pos.   |                | IRM Status | Success      |                   |                                  |
| Data File      | CYC-20211129-59.d | Method (Acq) | ZYJ-20201106.m | Comment    |              | Acq. Time (Local) | 12/1/2021 6:33:38 PM (UTC+08:00) |

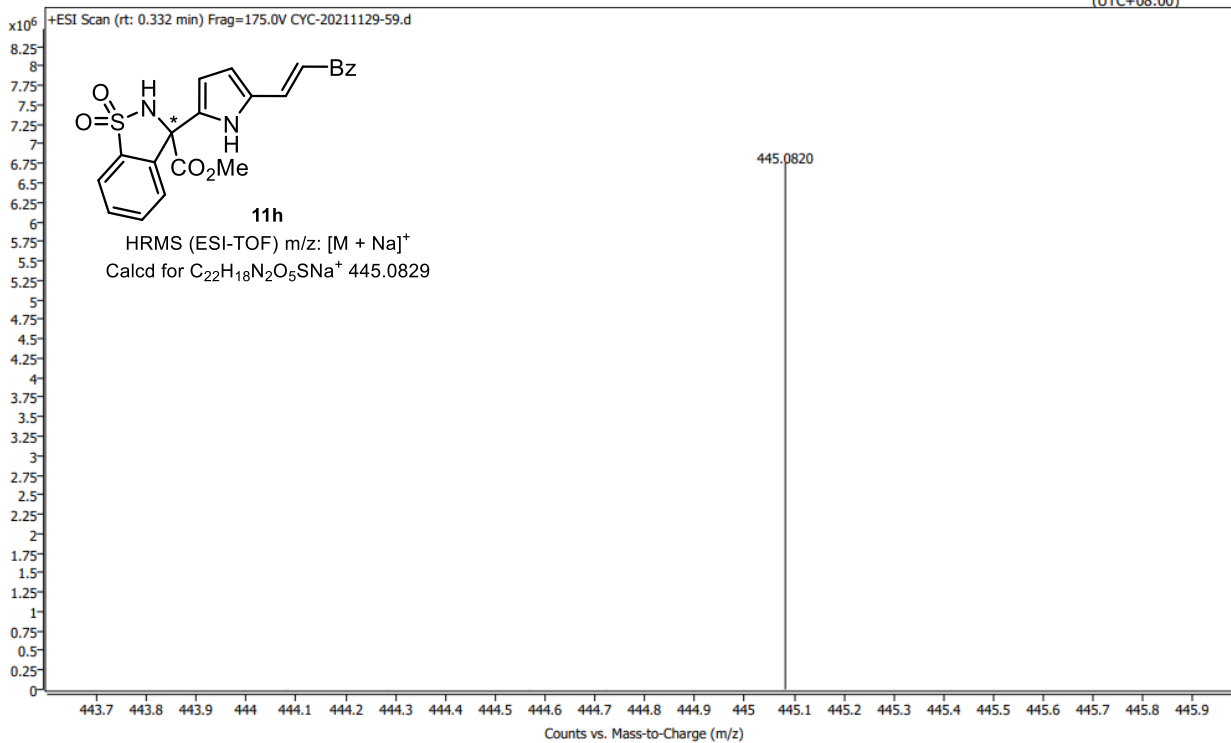

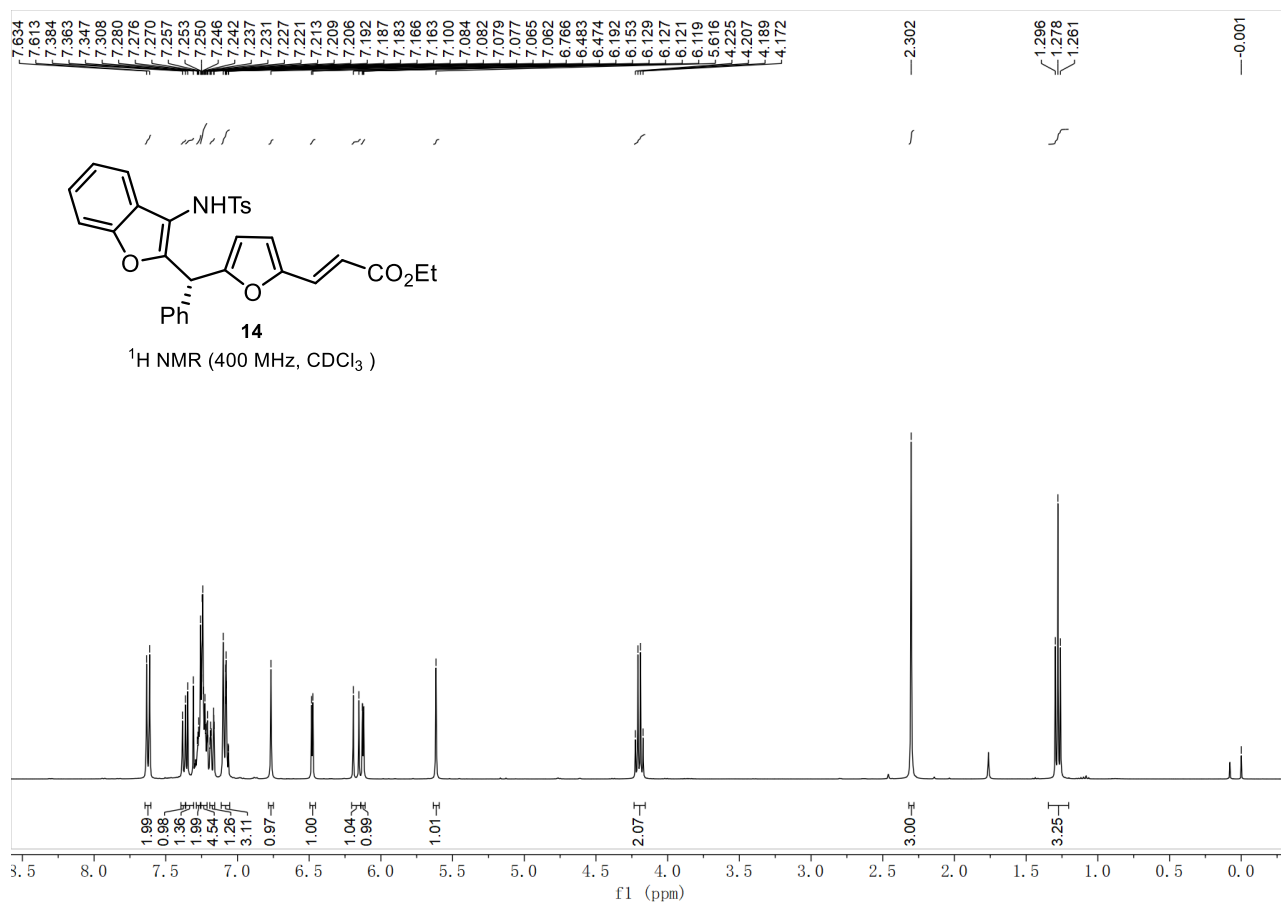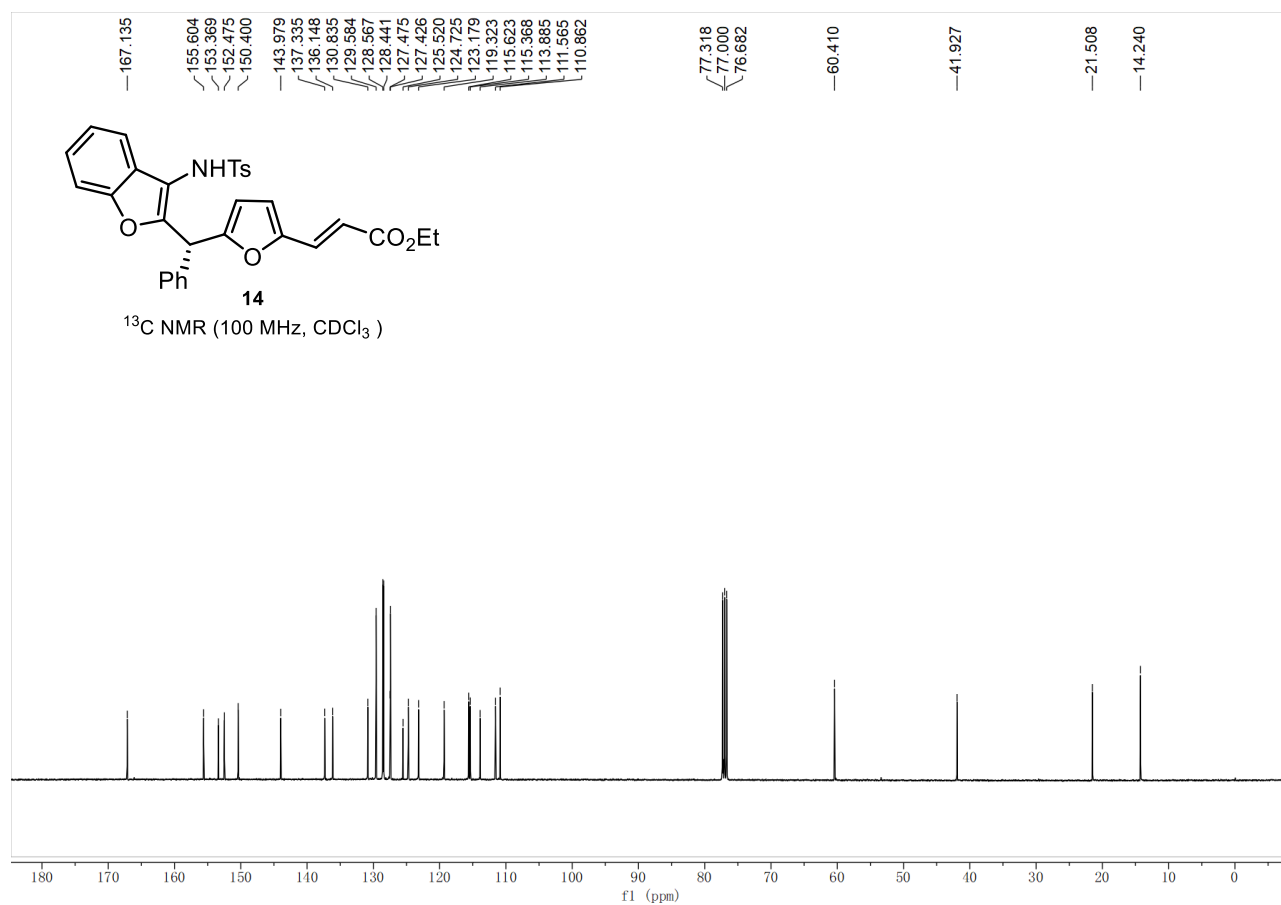

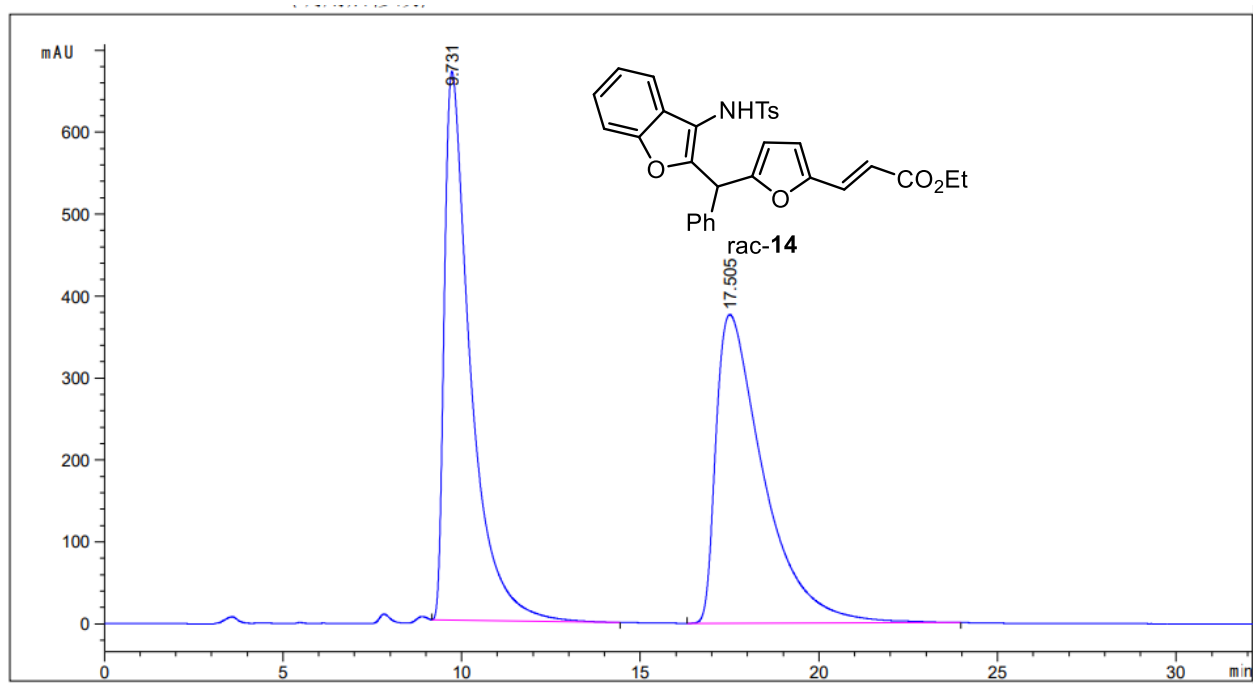

| # | [min]     | [min]  | mAU       | *s | [mAU]     | %       |
|---|-----------|--------|-----------|----|-----------|---------|
| 1 | 9.731 BB  | 0.7475 | 3.41244e4 |    | 669.52655 | 49.4824 |
| 2 | 17.505 BB | 1.3689 | 3.48383e4 |    | 376.62680 | 50.5176 |

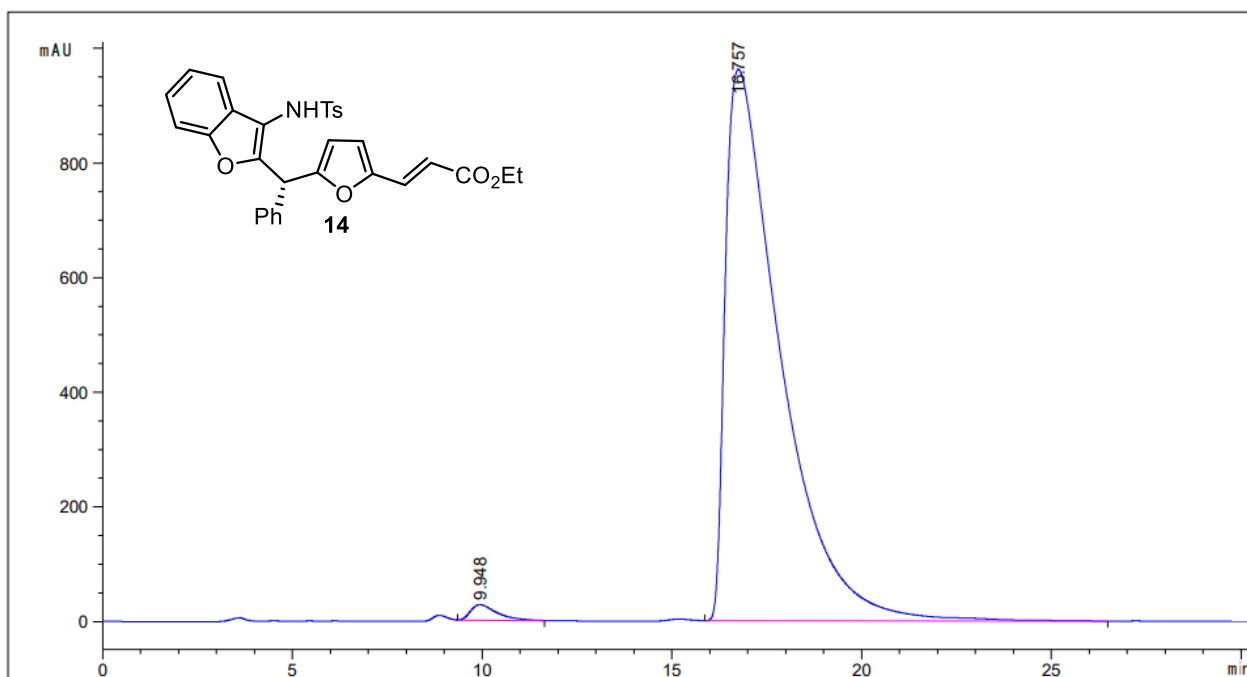

| # | [min]     | [min]  | mAU        | *s | [mAU]     | %       |
|---|-----------|--------|------------|----|-----------|---------|
| 1 | 9.948 BBA | 0.7228 | 1303.33203 |    | 27.02454  | 1.3264  |
| 2 | 16.757 BB | 1.4699 | 9.69607e4  |    | 962.11920 | 98.6736 |

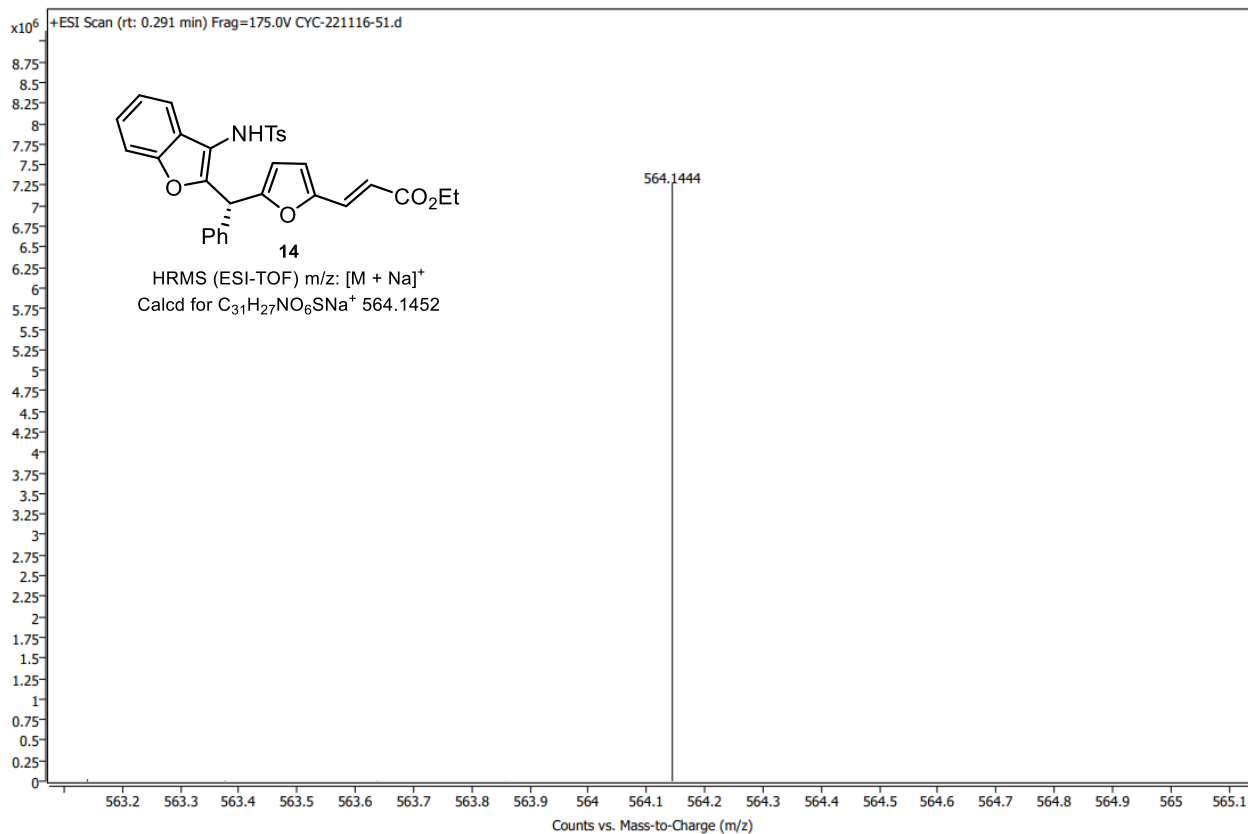

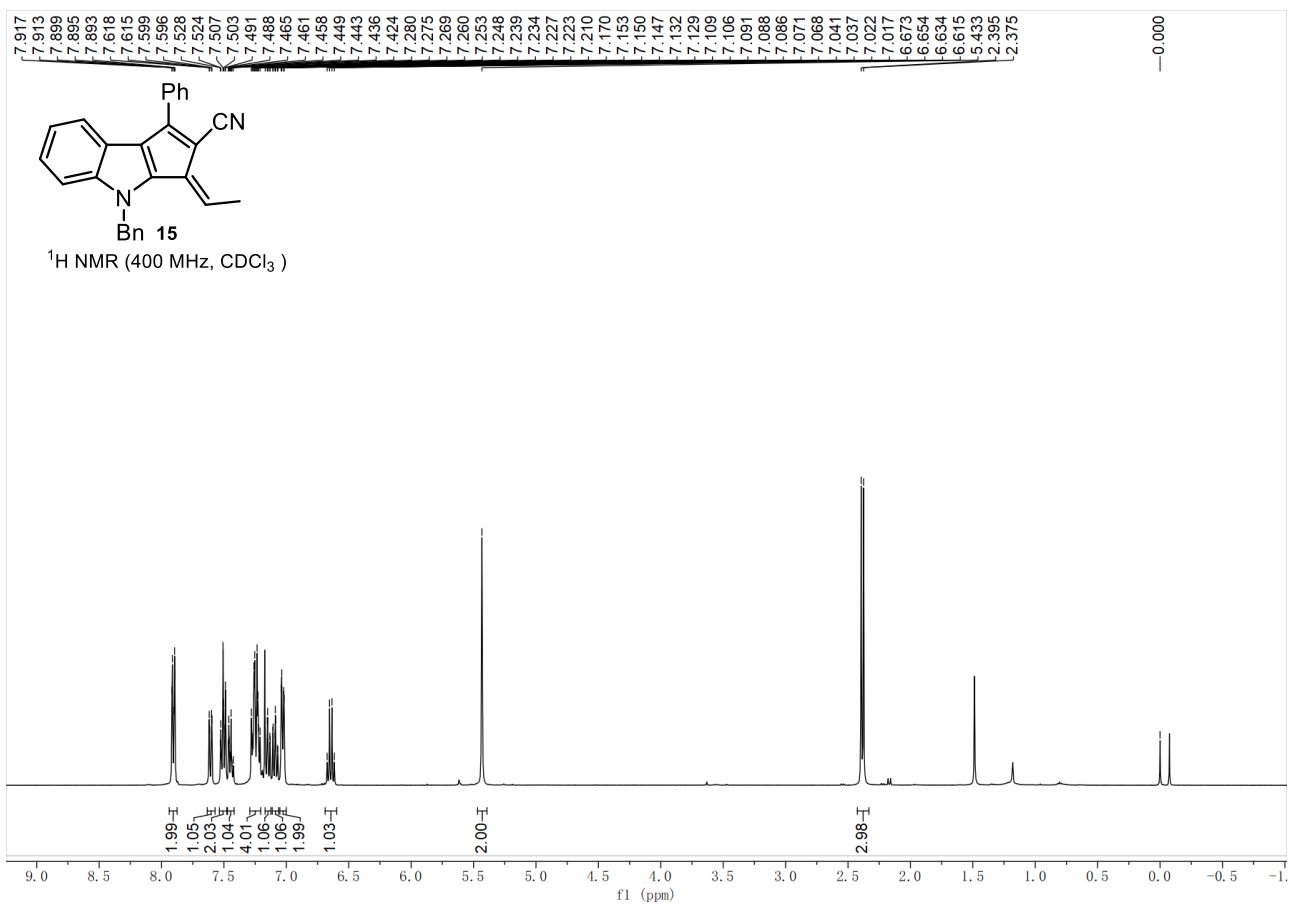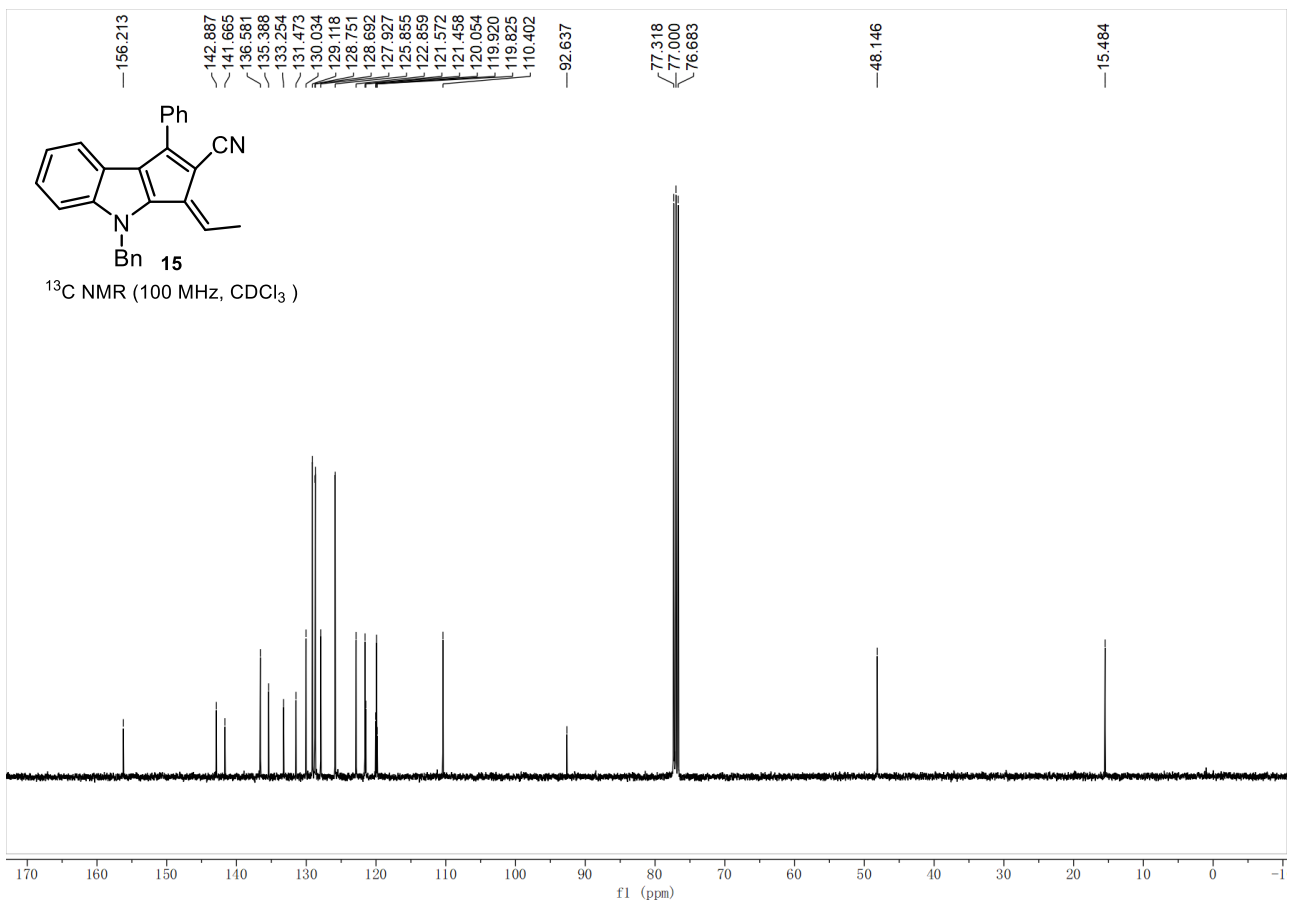

x10<sup>5</sup> +ESI Scan (rt: 0.285 min) Frag=175.0V CYC-220704-16-1.d

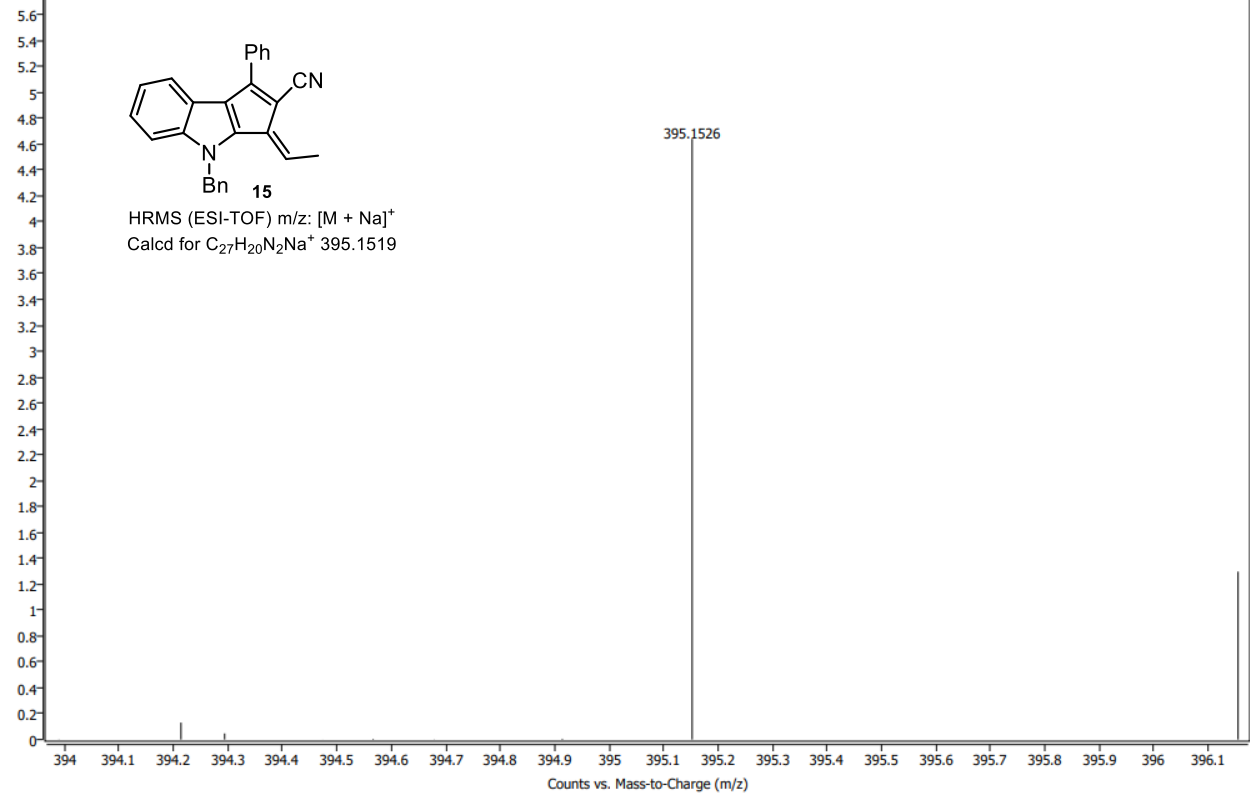



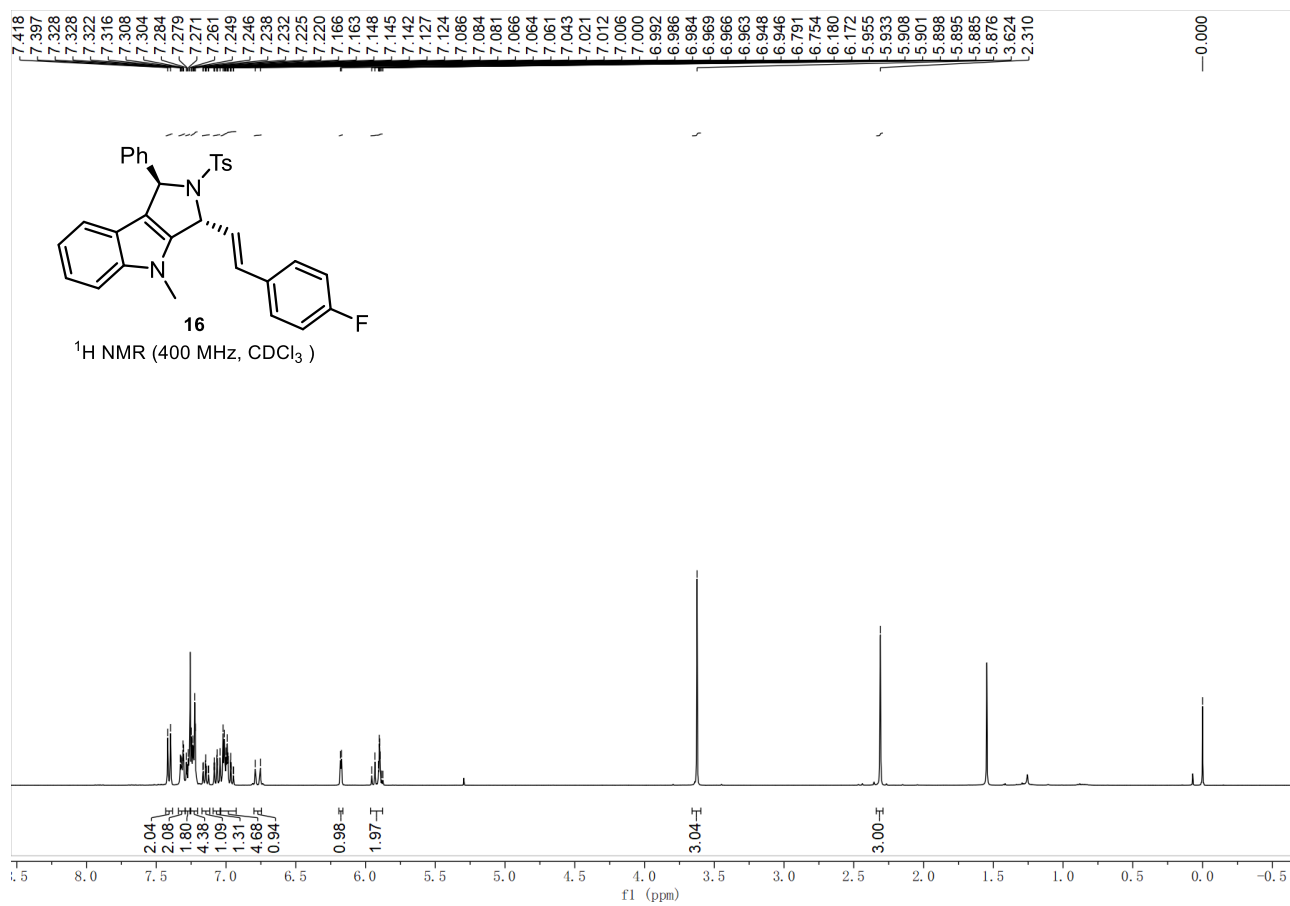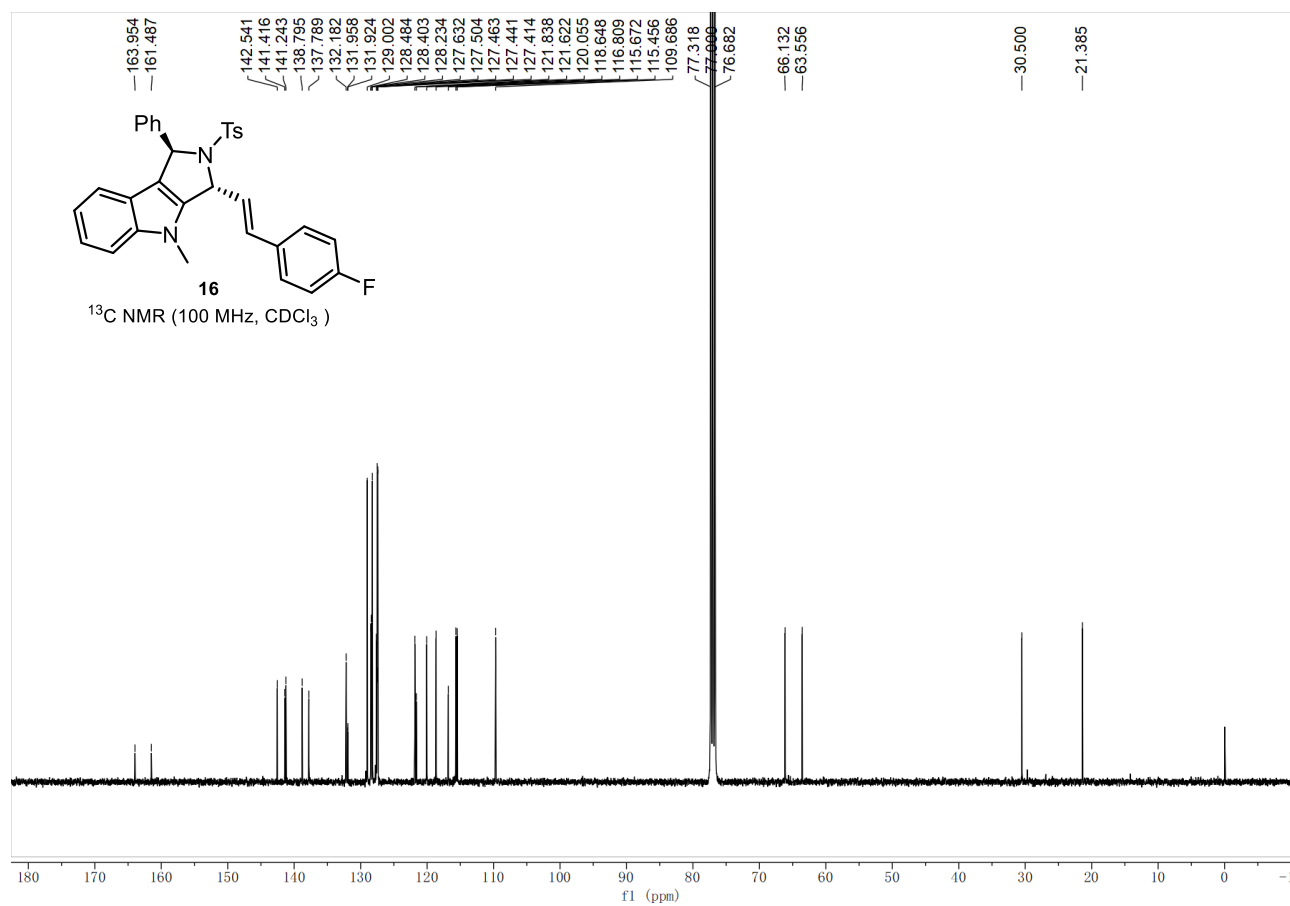

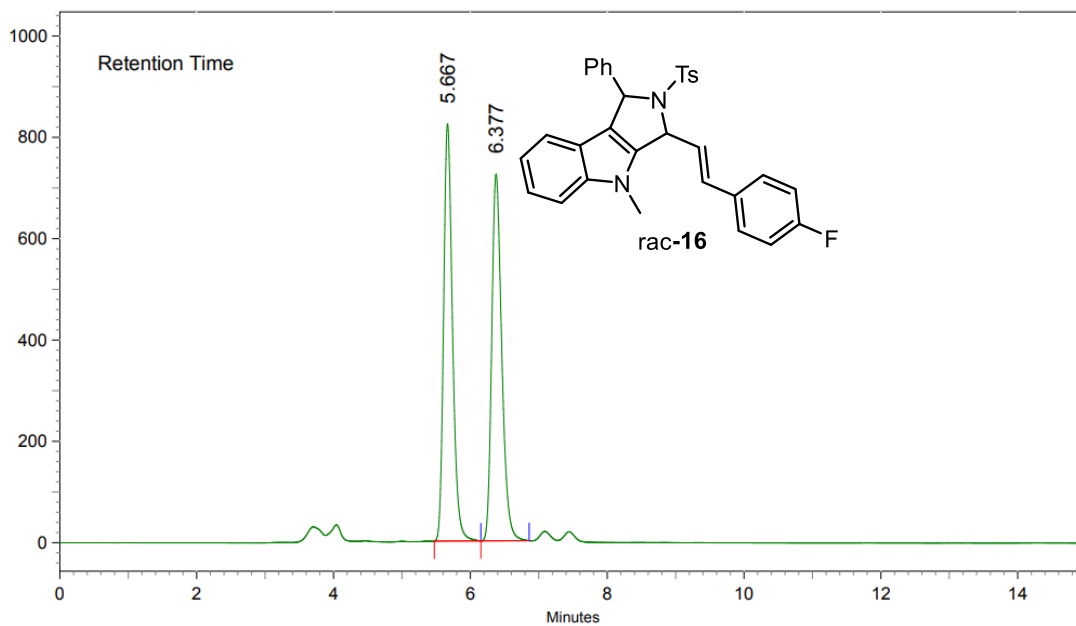

### AREA PERCENT REPORT

| Peak No. | Ret Time | Width | Height   | Area      | Area [%] |
|----------|----------|-------|----------|-----------|----------|
| 1        | 5.667    | 0.680 | 13816775 | 124349448 | 50.1392  |
| 2        | 6.377    | 0.707 | 12141863 | 123659064 | 49.8608  |

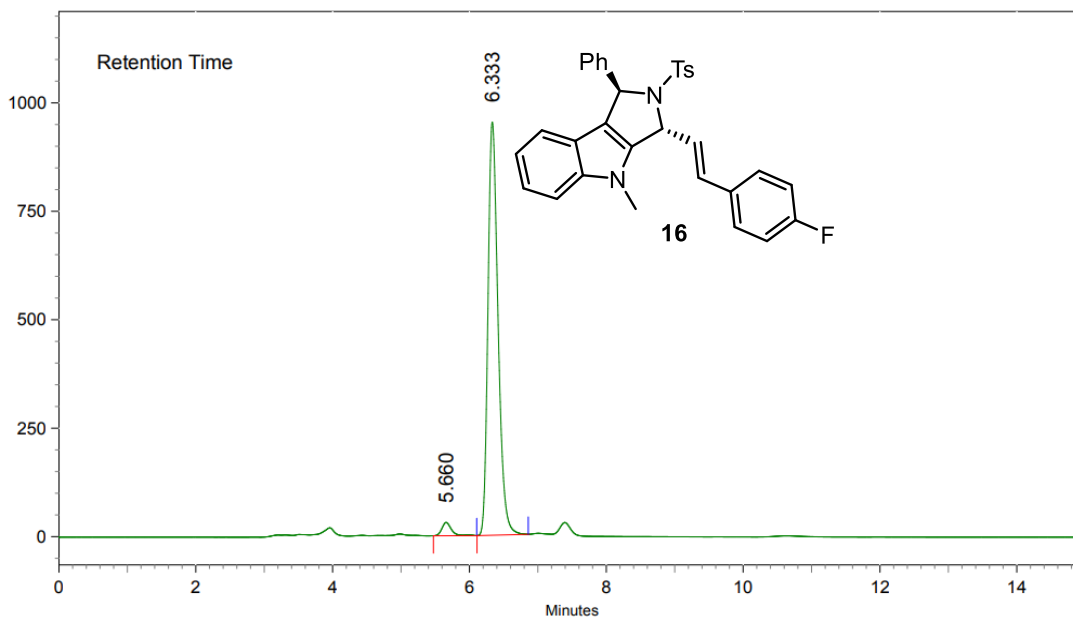

### AREA PERCENT REPORT

| Peak No. | Ret Time | Width | Height   | Area      | Area [%] |
|----------|----------|-------|----------|-----------|----------|
| 1        | 5.660    | 0.633 | 511382   | 5037454   | 2.9866   |
| 2        | 6.333    | 0.750 | 15979081 | 163631377 | 97.0134  |

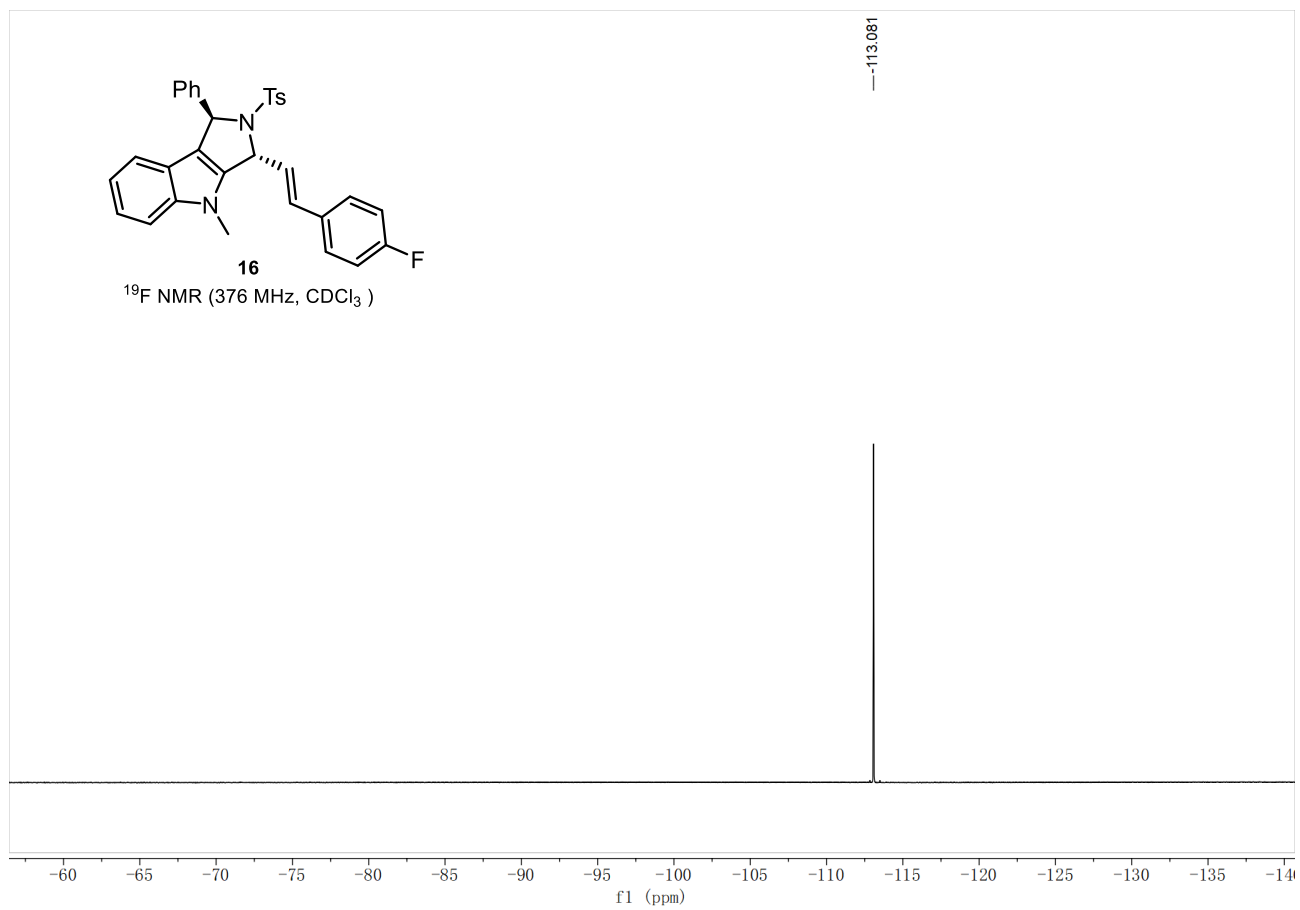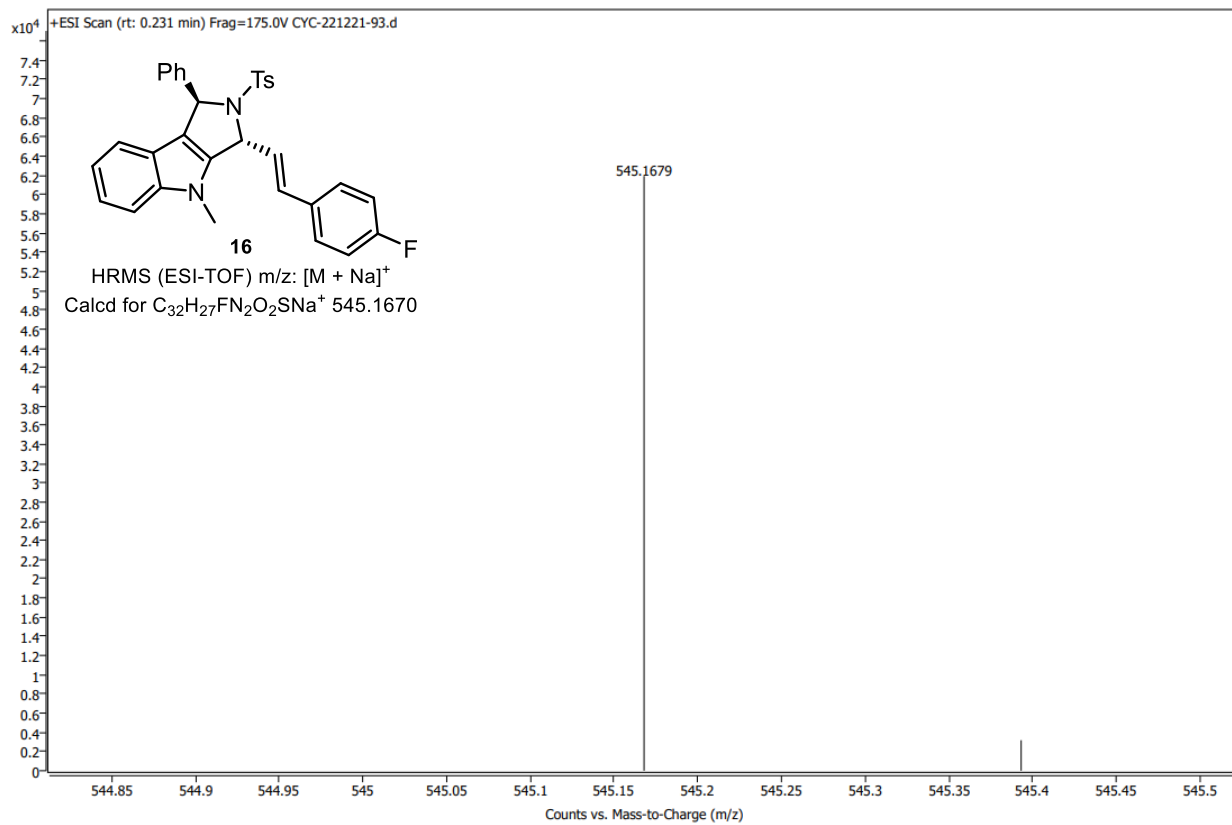

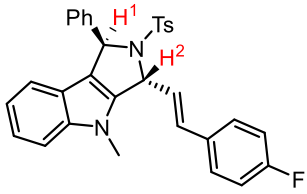

**16, NOEDS, 6.17 ppm**  
NOEDS NMR (600 MHz, CDCl<sub>3</sub>)

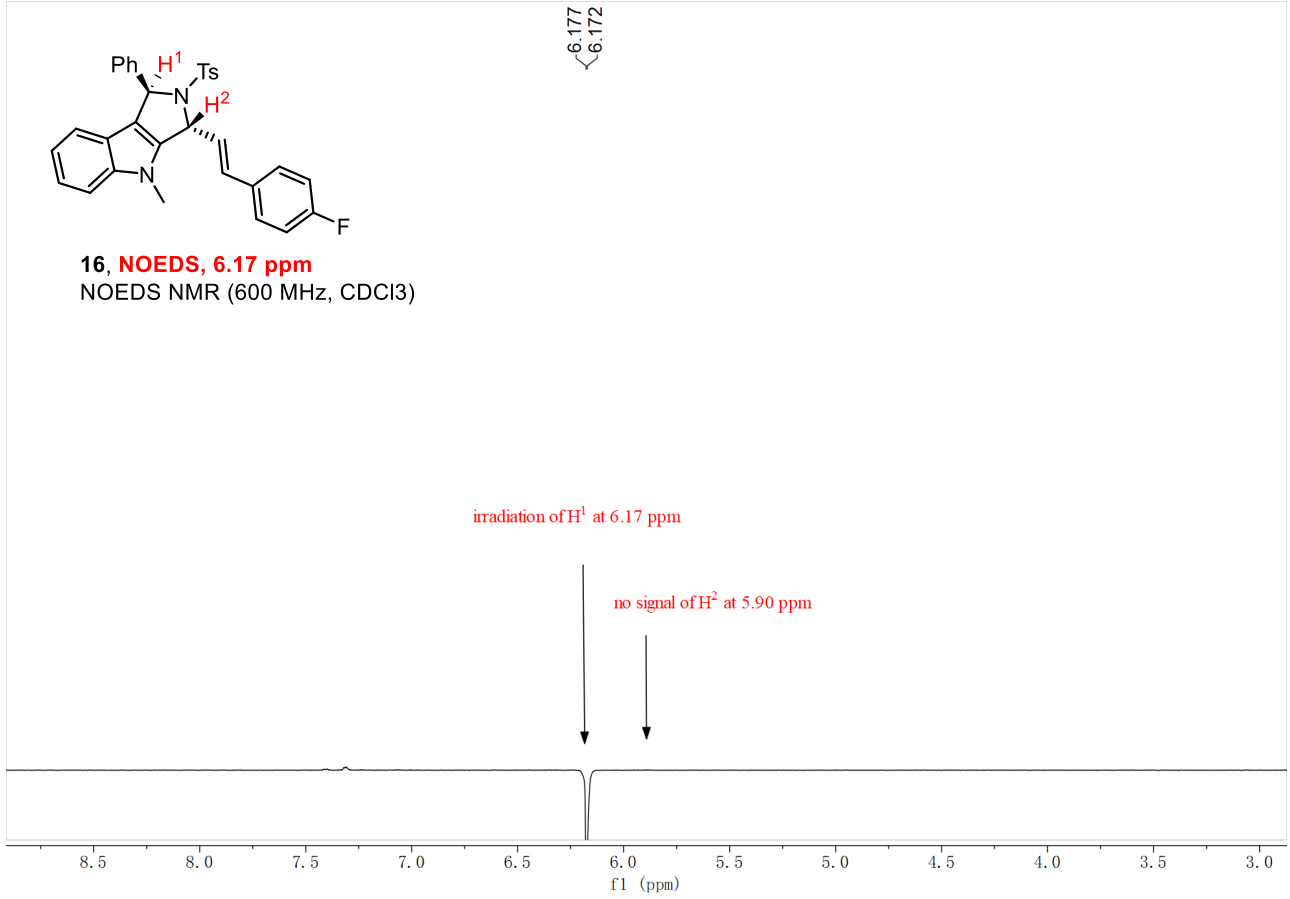

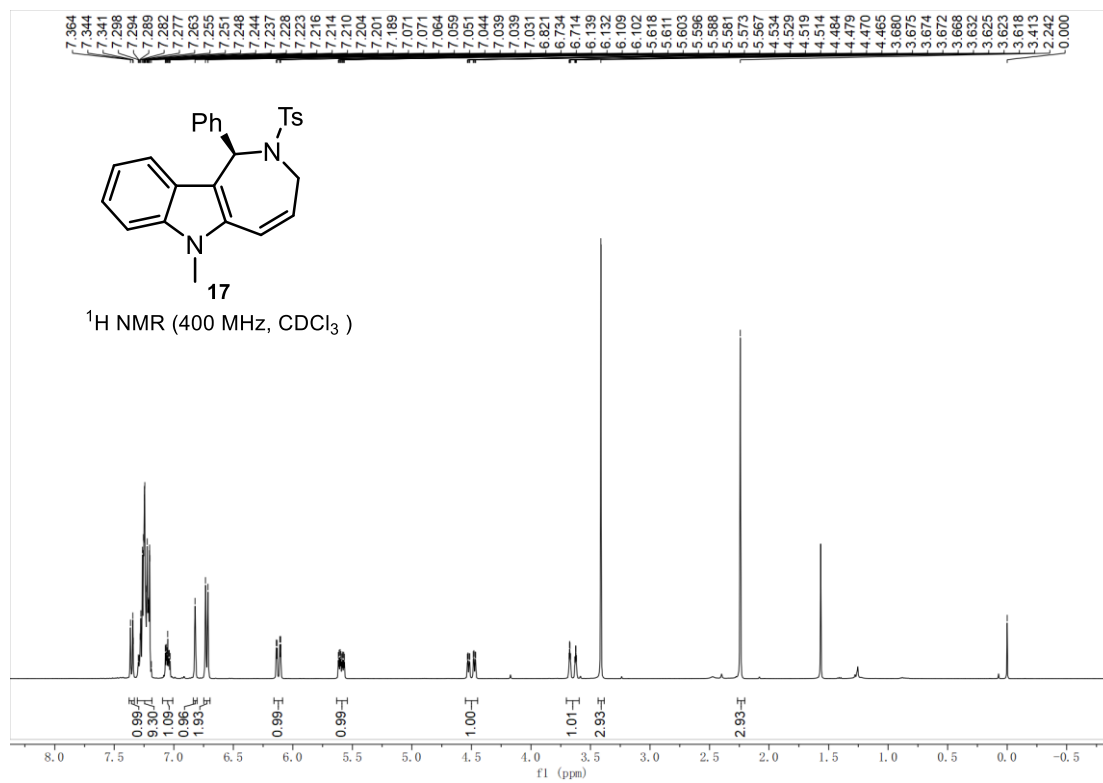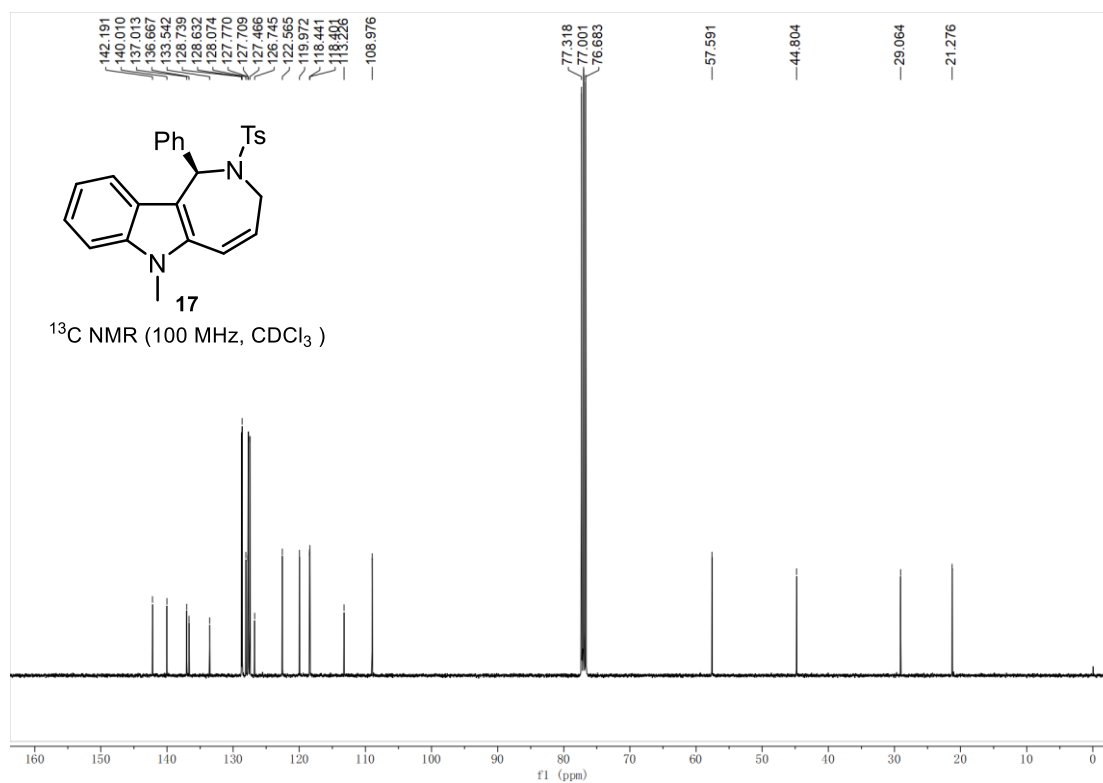

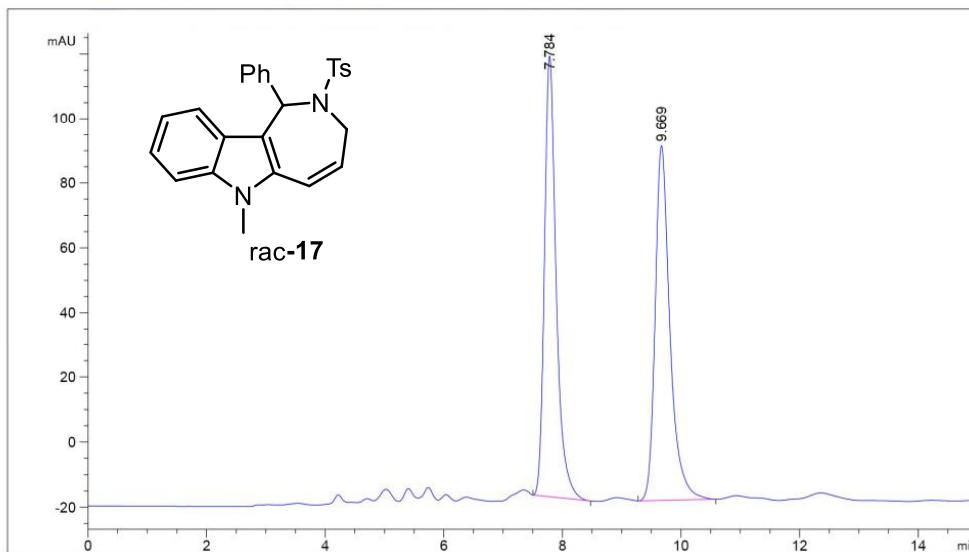

| # | [min] | [min] | [min]  | [mAU*s]    | [mAU]     | %       |
|---|-------|-------|--------|------------|-----------|---------|
| 1 | 7.784 | BB    | 0.2059 | 1859.19116 | 136.14977 | 49.5583 |
| 2 | 9.669 | BBA   | 0.2585 | 1892.33118 | 109.43252 | 50.4417 |

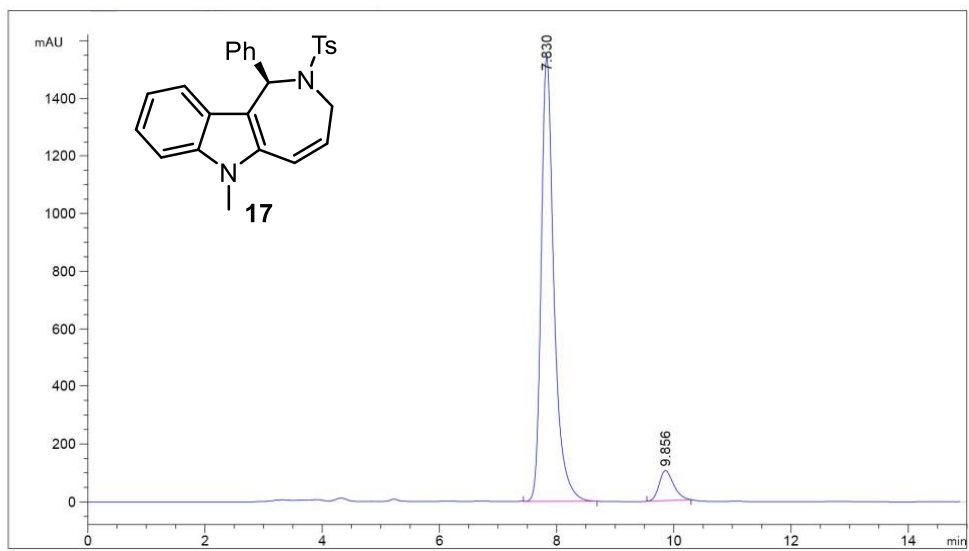

| # | [min] | [min] | mAU    | *s         | [mAU]      | %       |
|---|-------|-------|--------|------------|------------|---------|
| 1 | 7.830 | VBA   | 0.2273 | 2.33143e4  | 1542.44690 | 92.9078 |
| 2 | 9.856 | BBA   | 0.2616 | 1779.71838 | 103.58669  | 7.0922  |

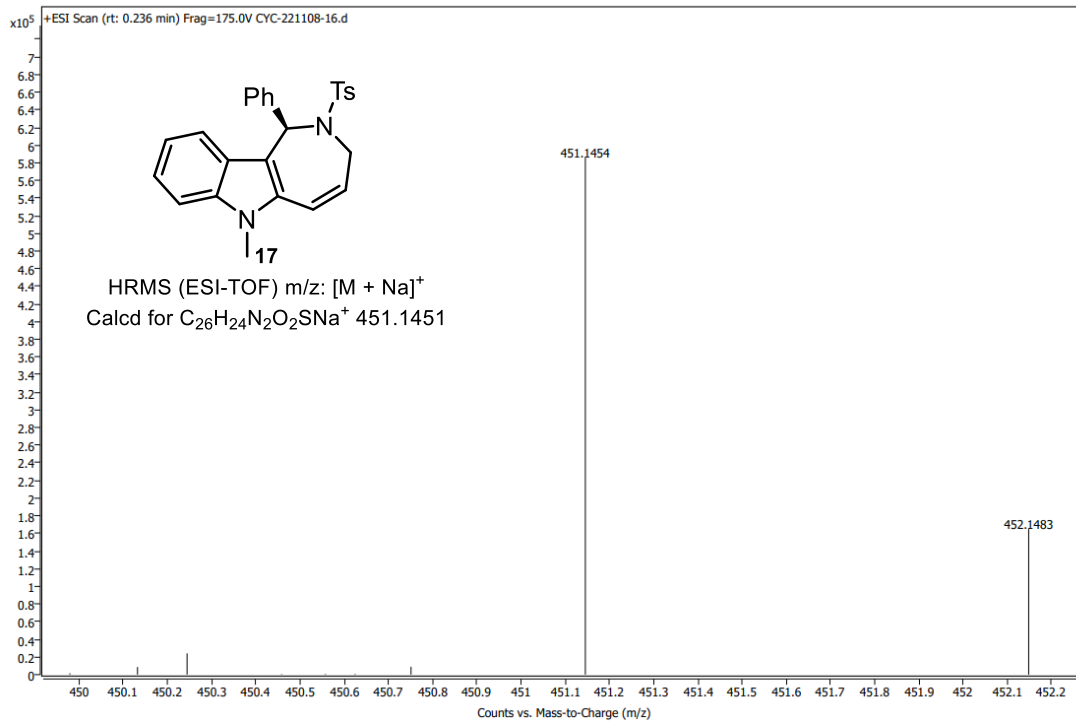

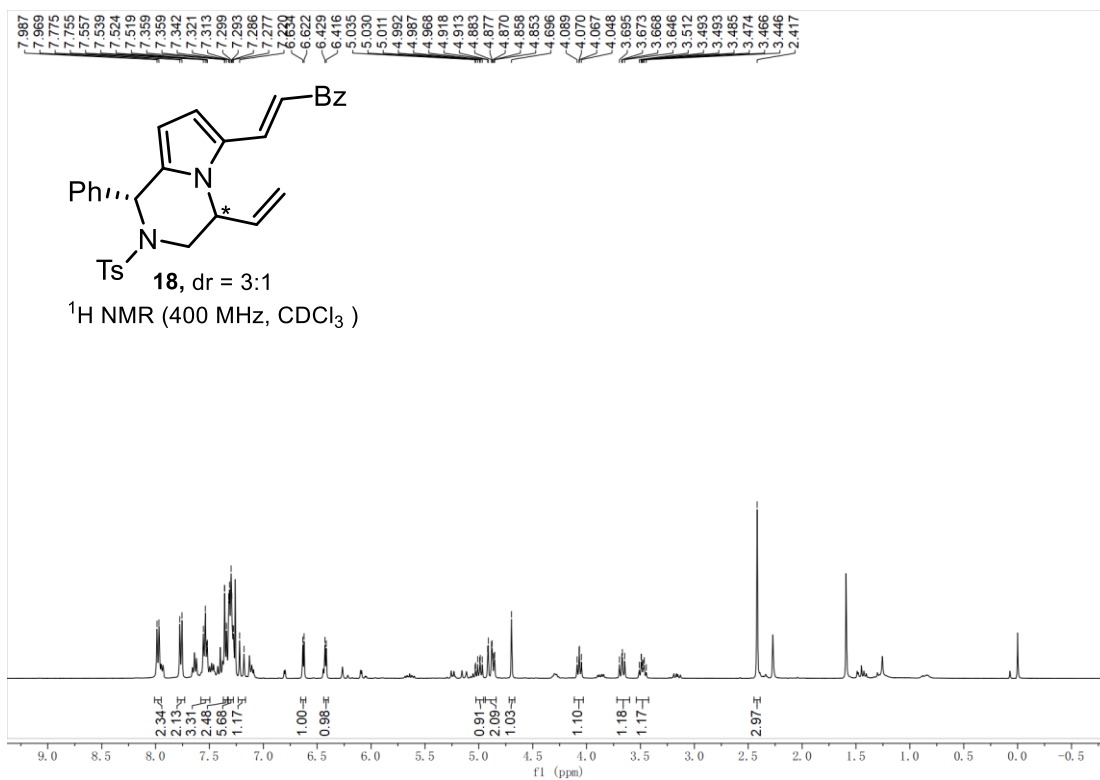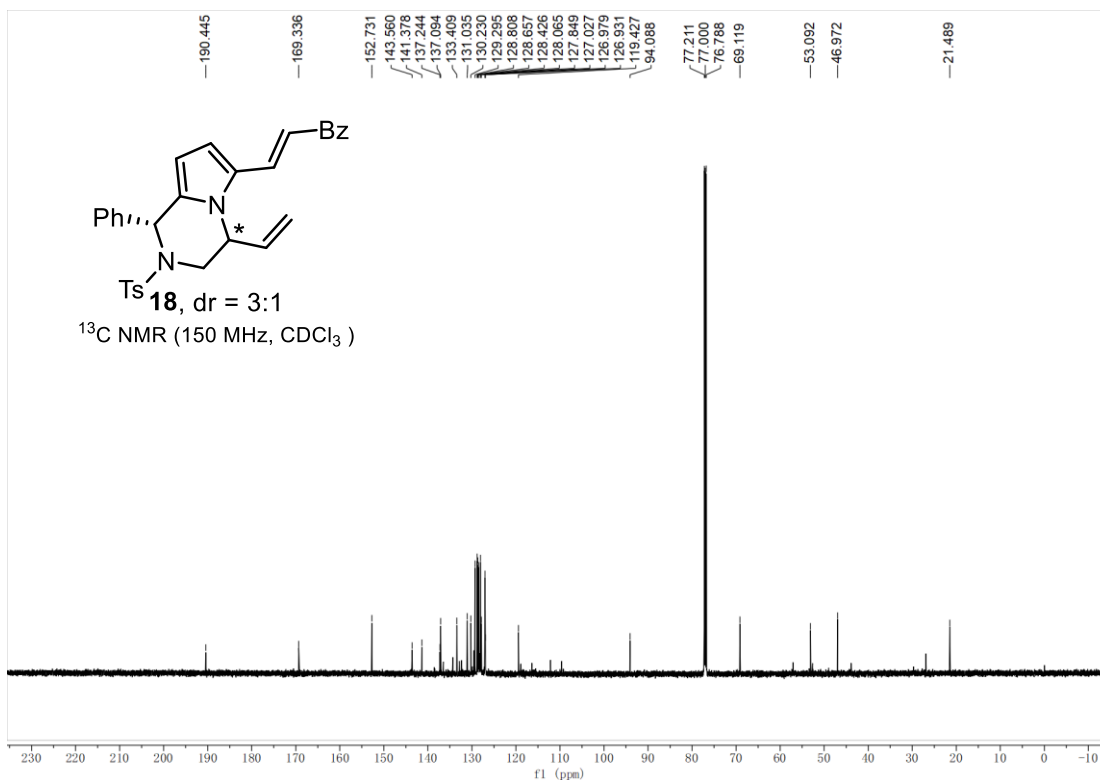



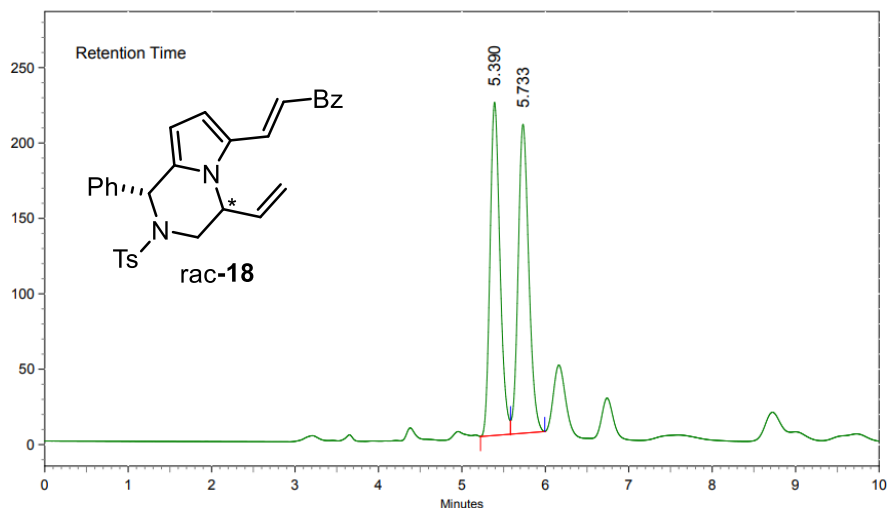

AREA PERCENT REPORT

| Peak No. | Ret Time | Width | Height  | Area     | Area [%] |
|----------|----------|-------|---------|----------|----------|
| 1        | 5.390    | 0.360 | 3705253 | 30571708 | 50.0149  |
| 2        | 5.733    | 0.410 | 3435941 | 30553461 | 49.9851  |

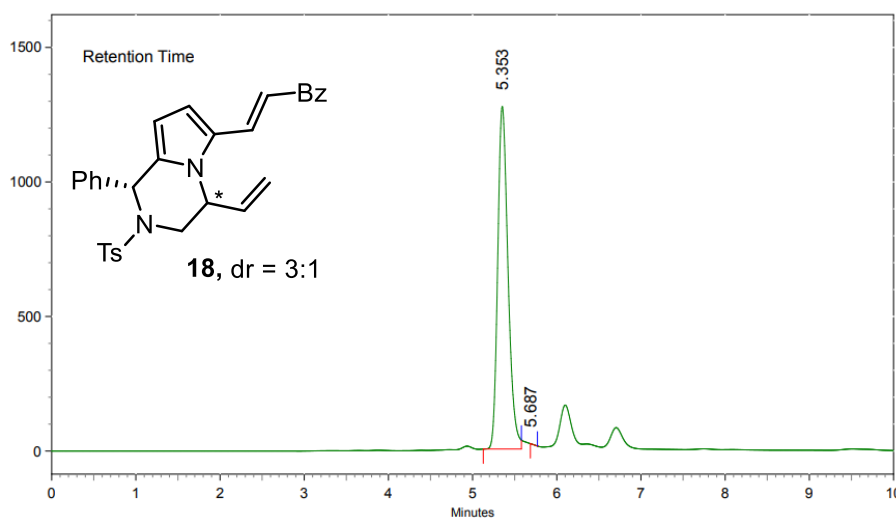

AREA PERCENT REPORT

| Peak No. | Ret Time | Width | Height   | Area      | Area [%] |
|----------|----------|-------|----------|-----------|----------|
| 1        | 5.353    | 0.453 | 21355708 | 181135446 | 99.9939  |
| 2        | 5.687    | 0.083 | 0        | 11068     | 0.0061   |

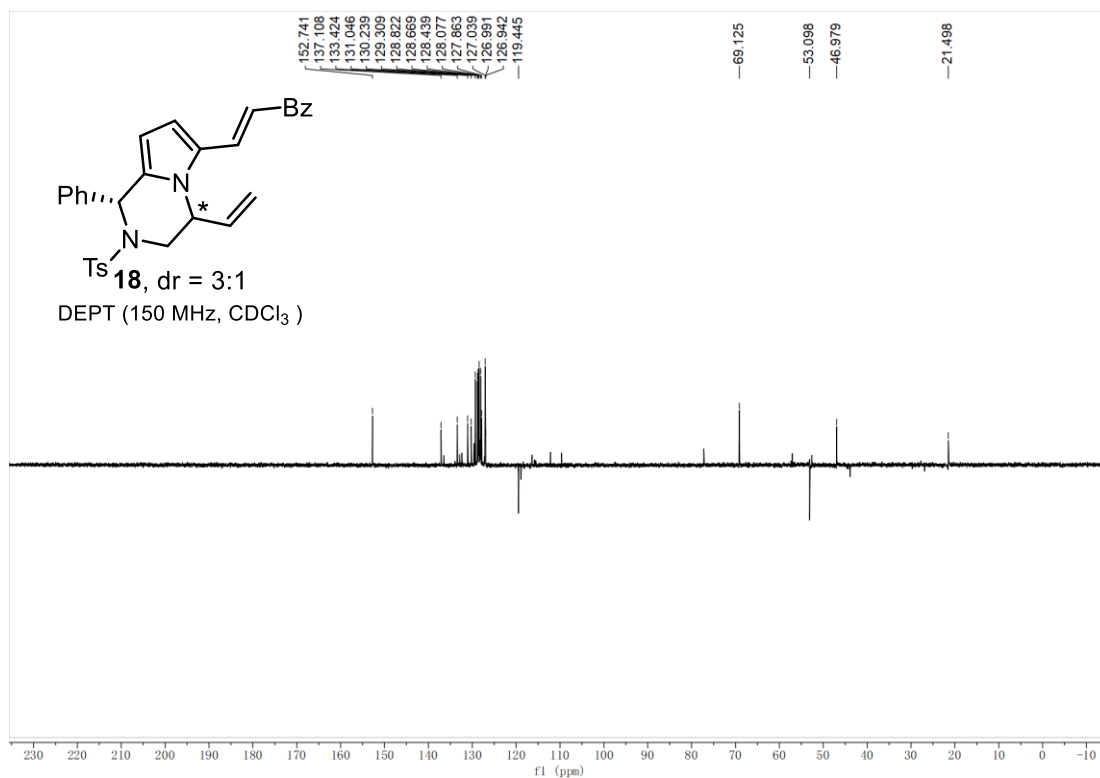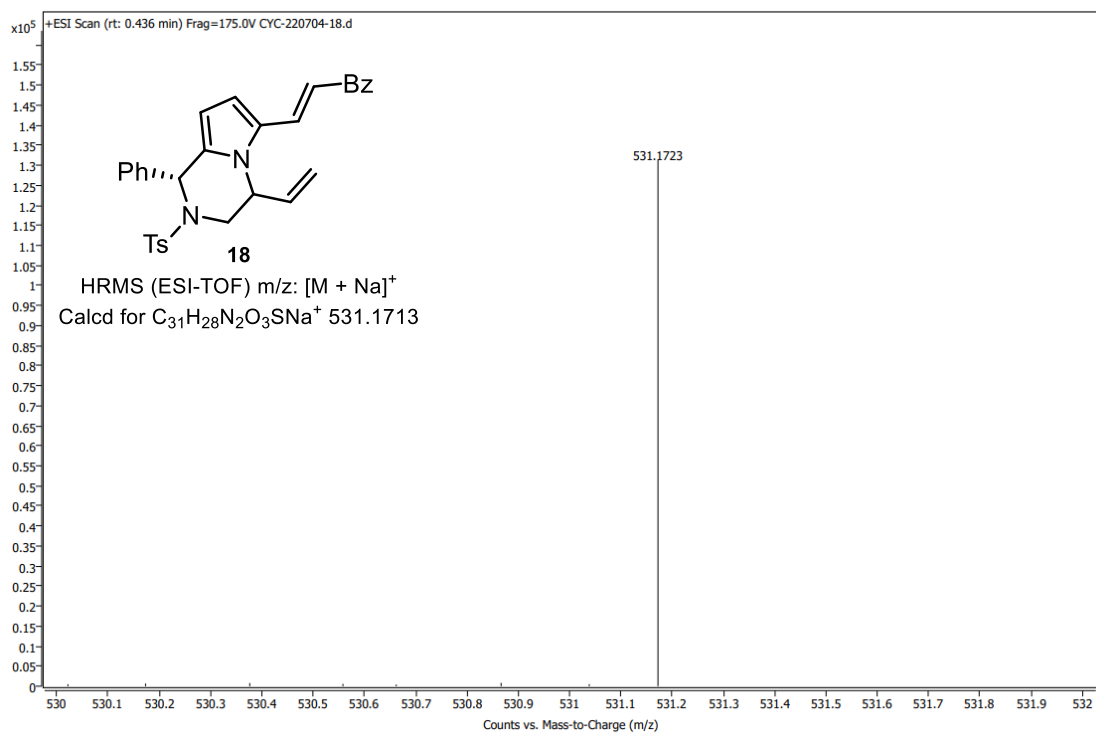

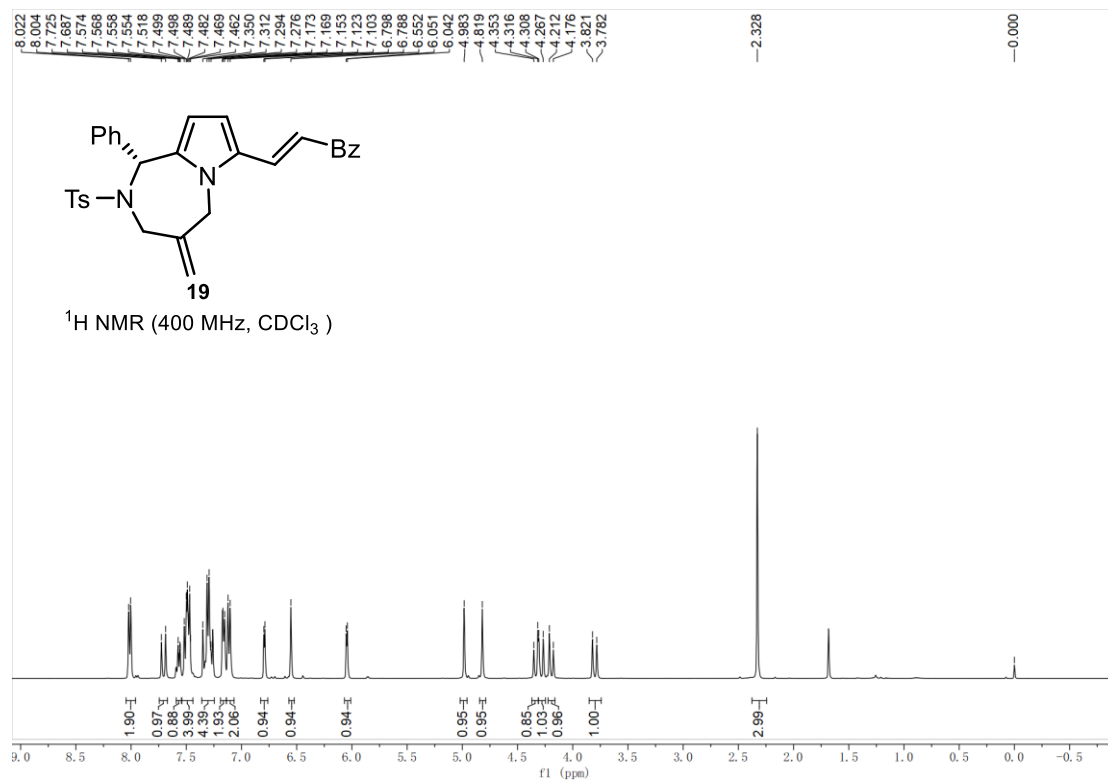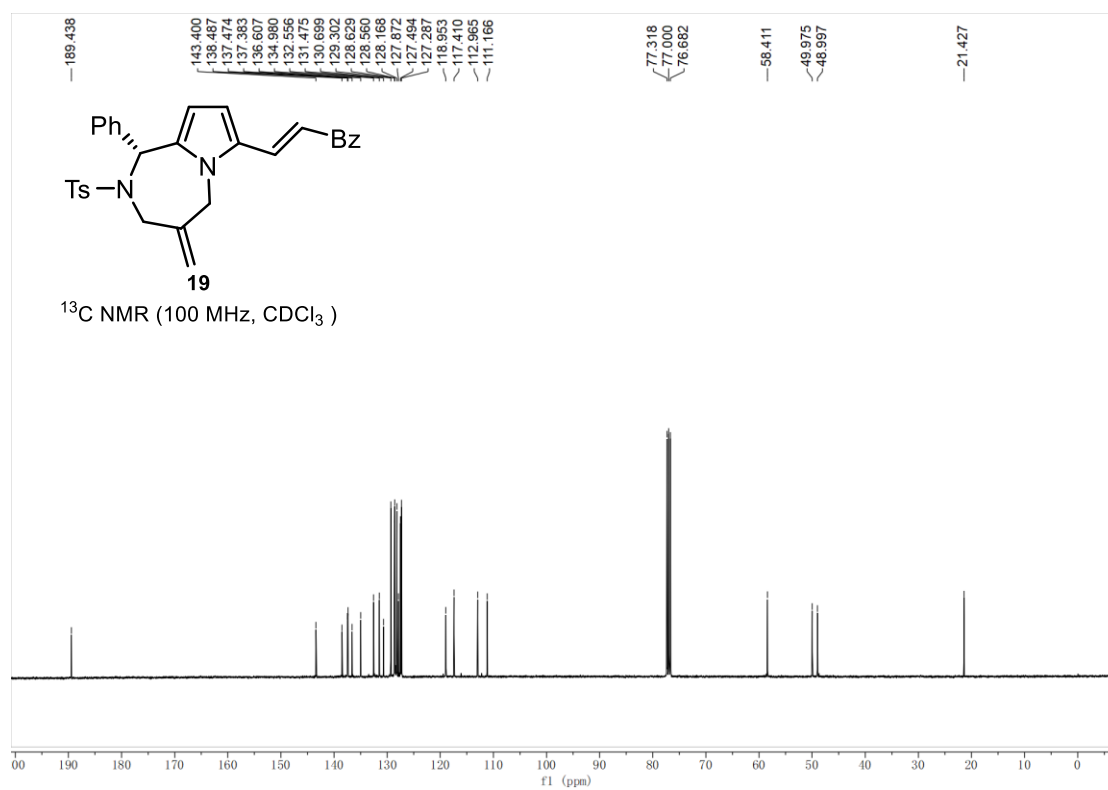

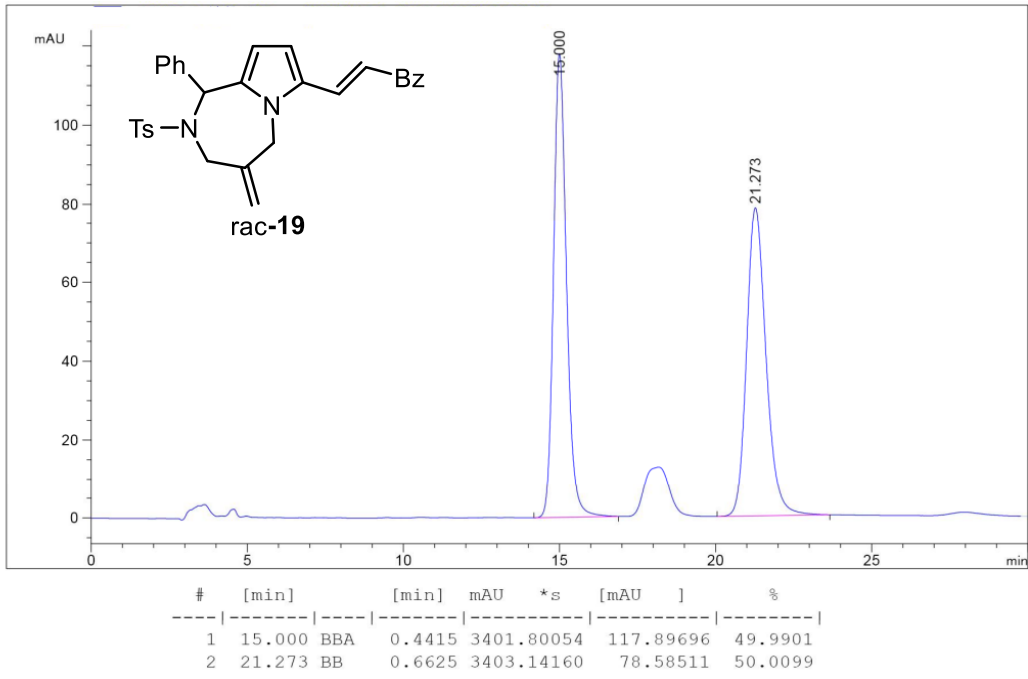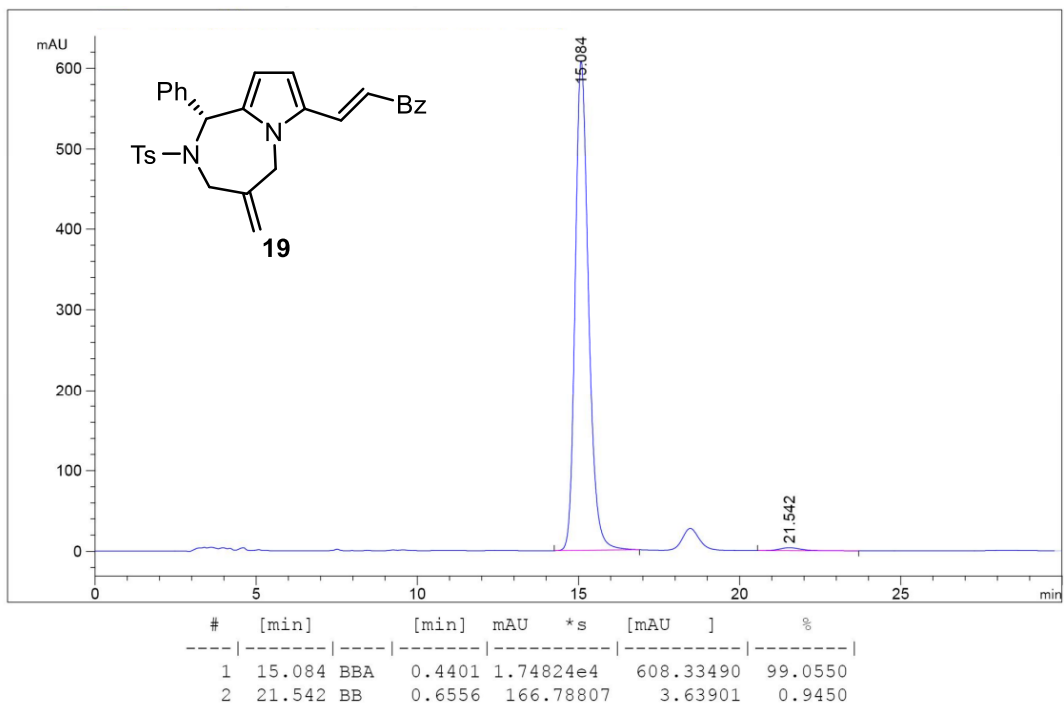

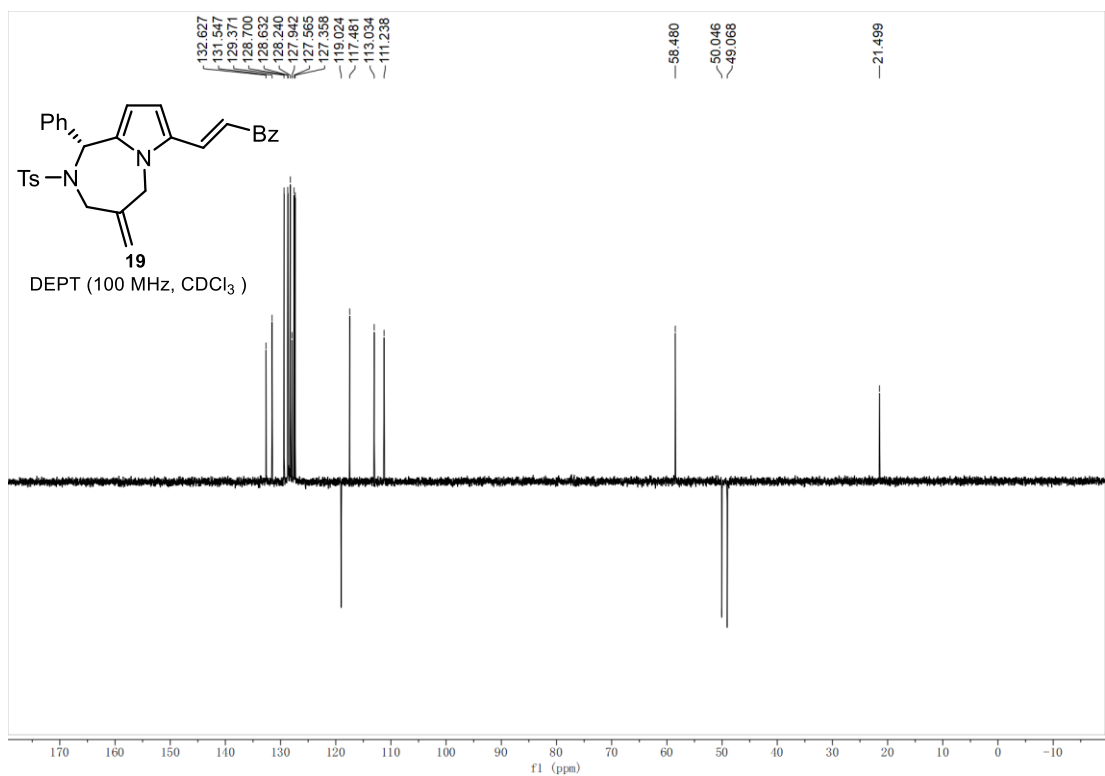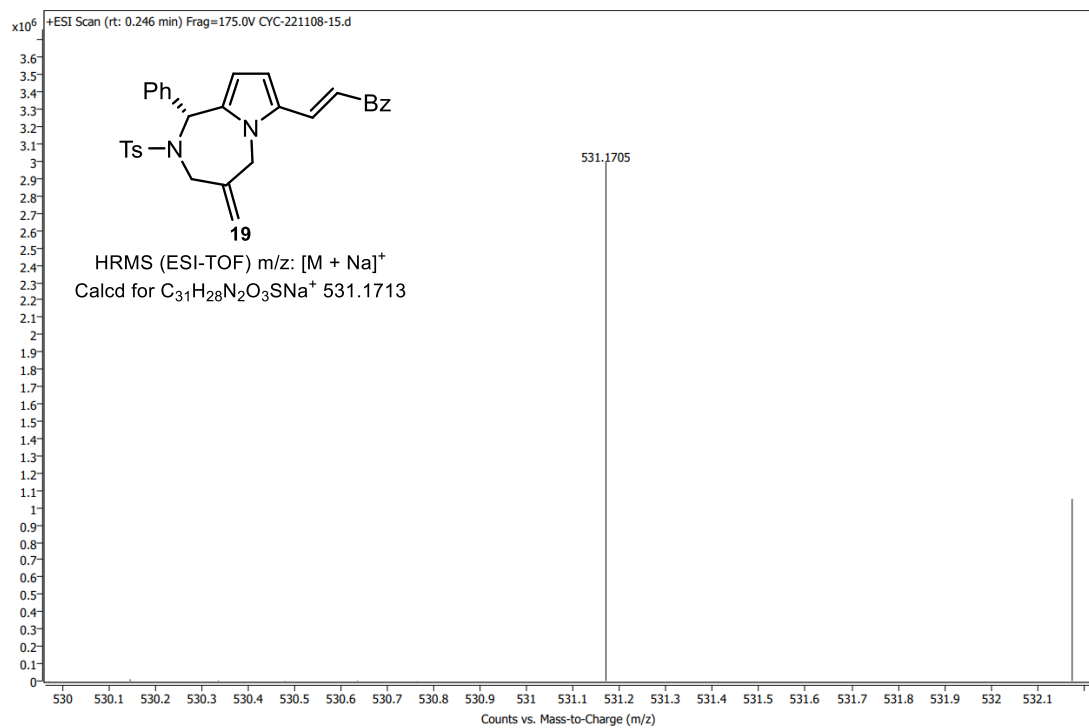

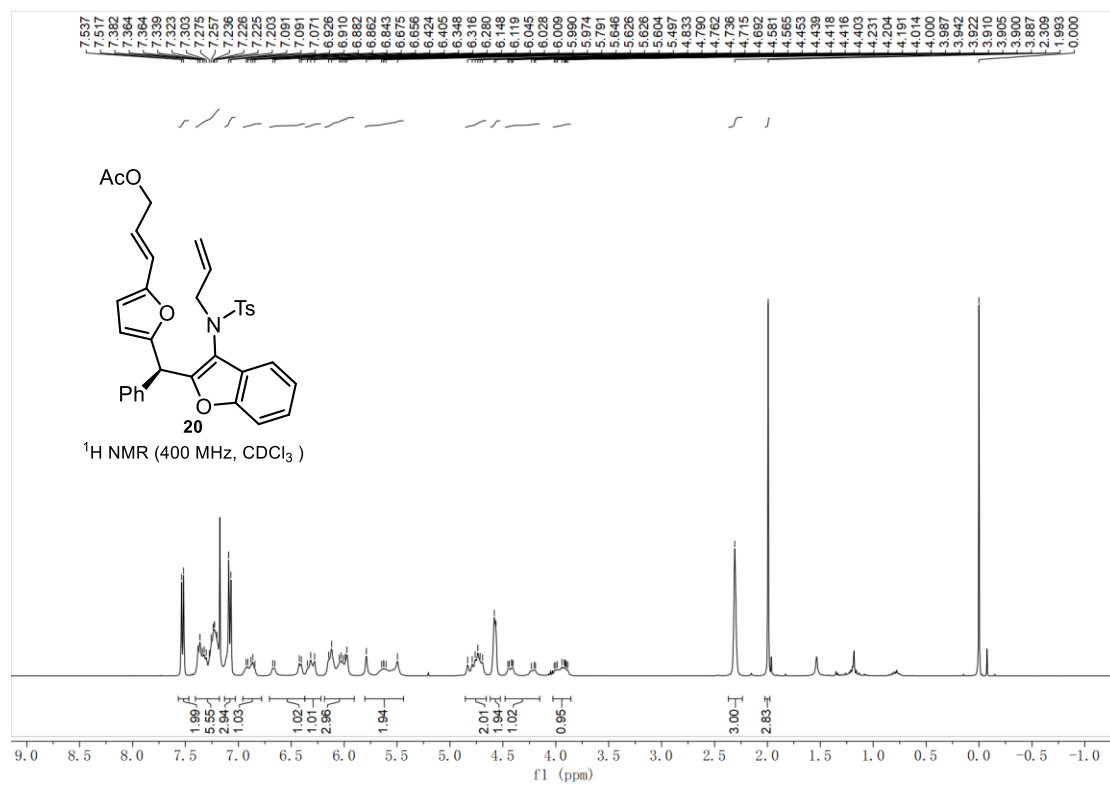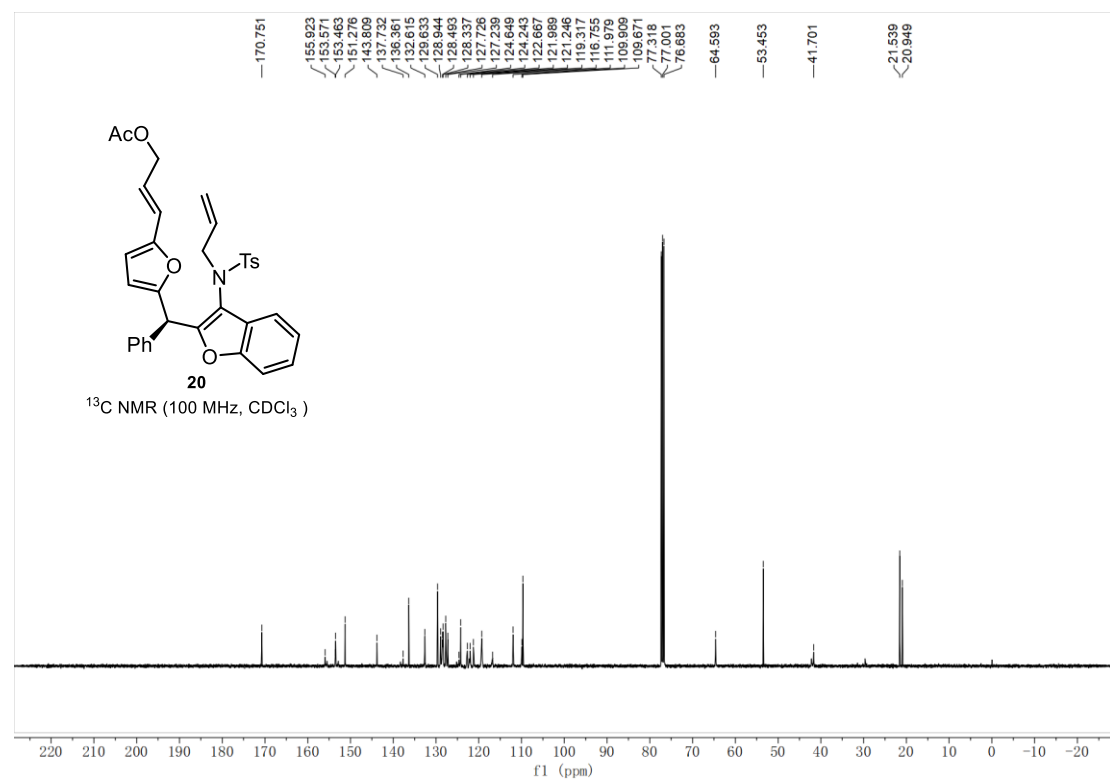

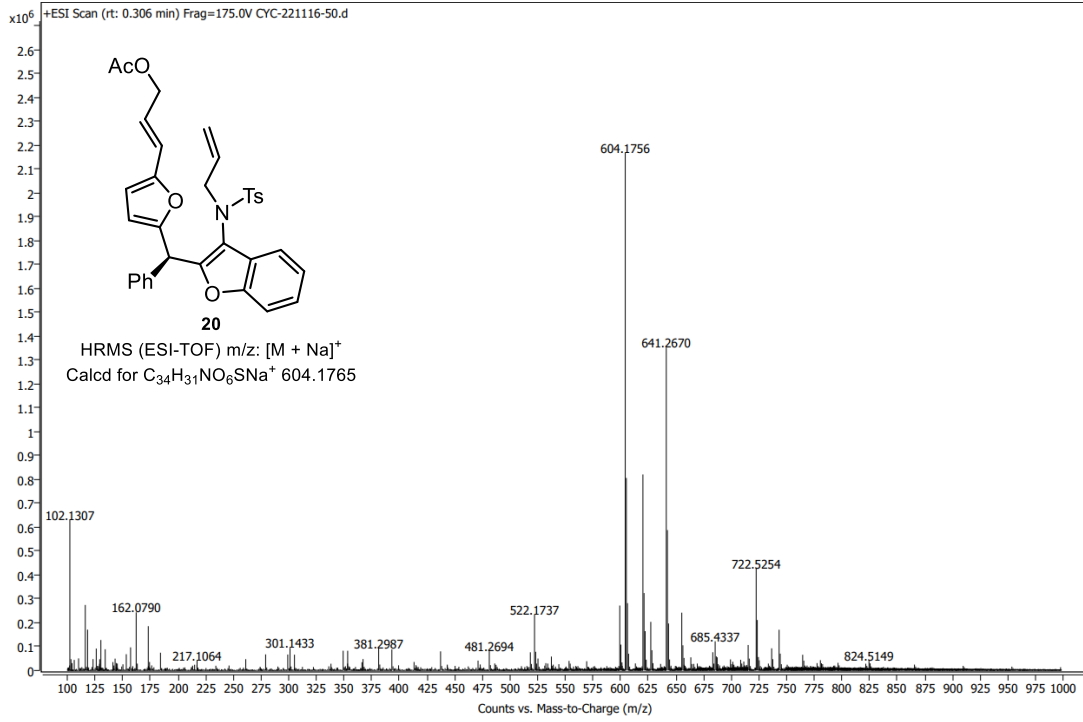

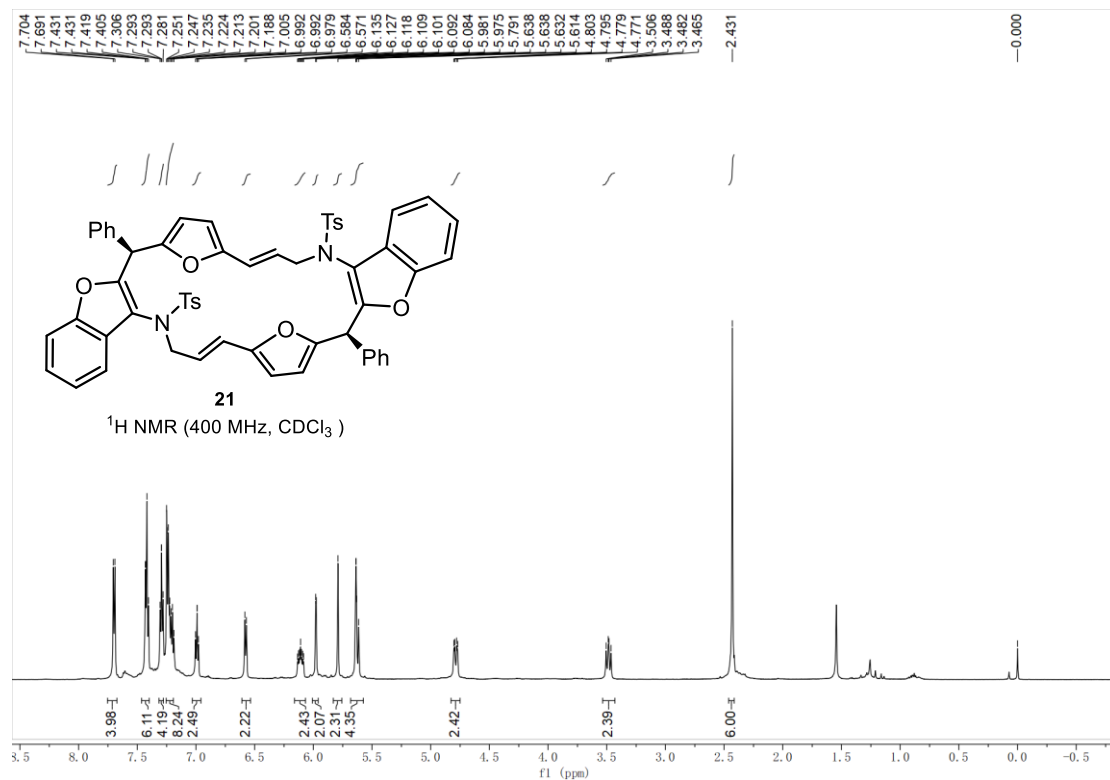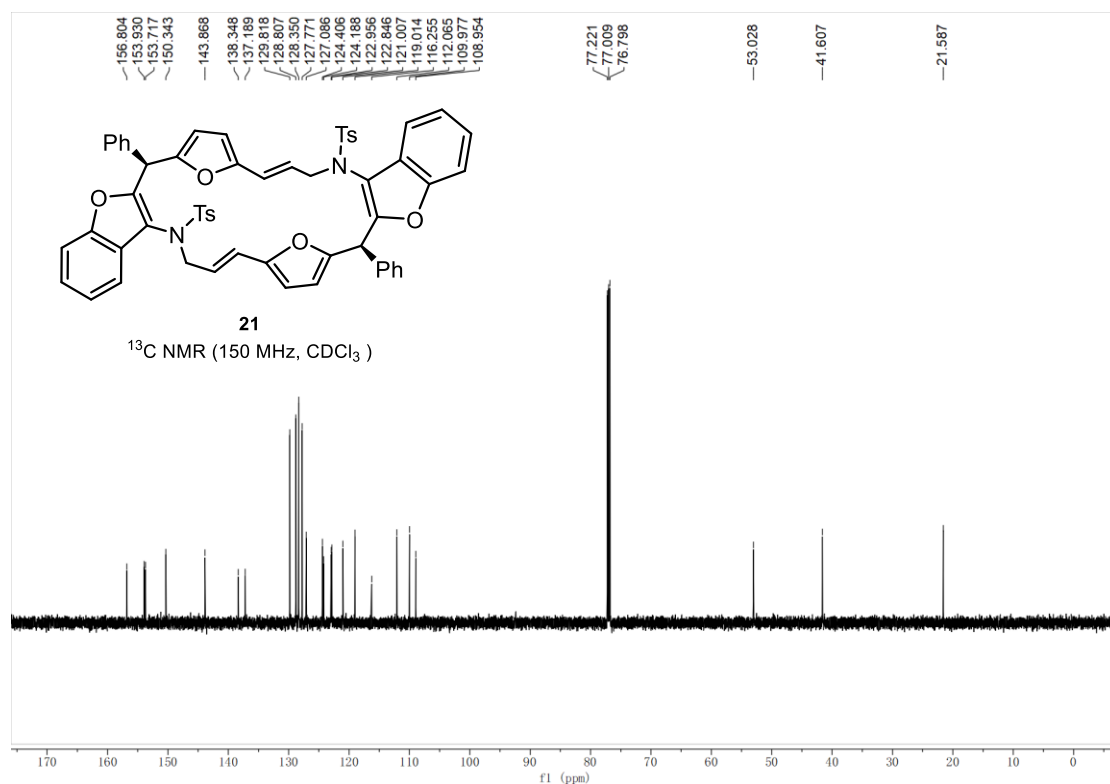



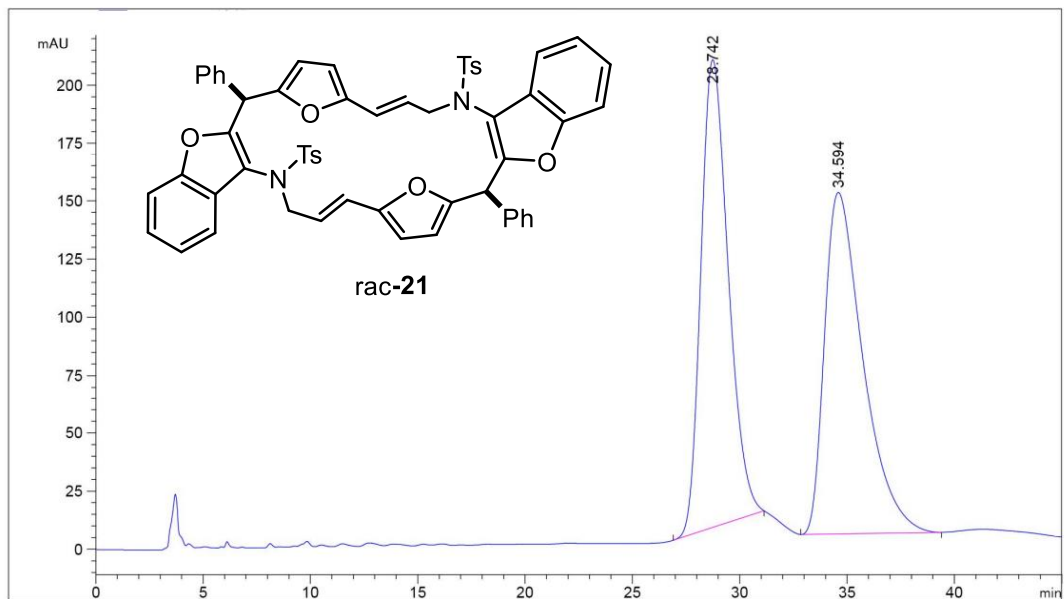

| # | [min]  |     | [min]  | mAU       | *s | [mAU ]    | %       |
|---|--------|-----|--------|-----------|----|-----------|---------|
| 1 | 28.742 | BBA | 1.3556 | 1.78390e4 |    | 201.59328 | 49.3382 |
| 2 | 34.594 | BB  | 1.8529 | 1.83176e4 |    | 146.98248 | 50.6618 |

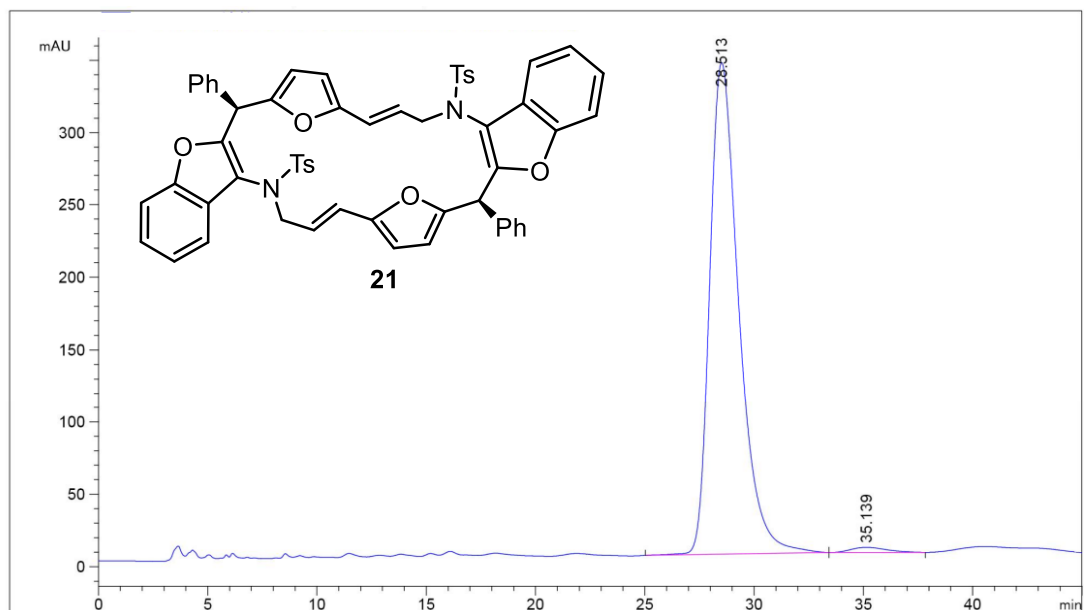

| # | [min]  |    | [min]  | mAU       | *s | [mAU ]    | %       |
|---|--------|----|--------|-----------|----|-----------|---------|
| 1 | 28.513 | BB | 1.4075 | 3.14136e4 |    | 339.82047 | 98.7411 |
| 2 | 35.139 | BB | 1.3174 | 400.49359 |    | 3.57047   | 1.2589  |

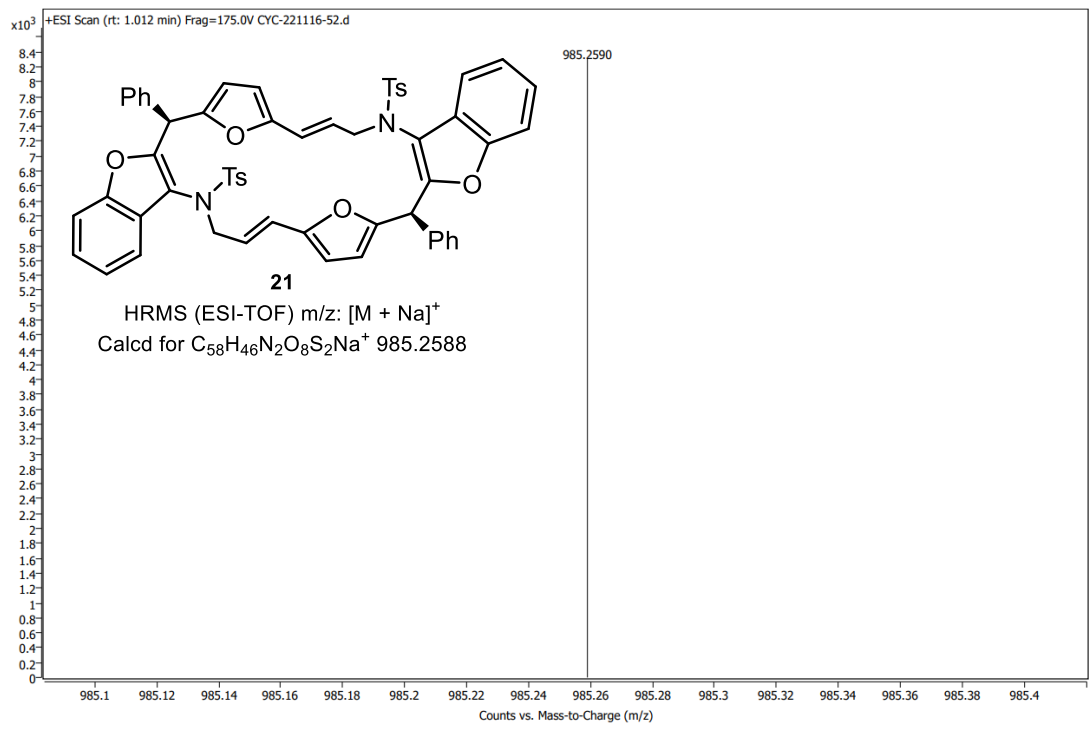

## 19. Computational details

### 1) Absolute Calculation Energies, Enthalpies, and Free Energies

| Geometry            | $E_{(\text{elec-B3})}^1$ | $G_{(\text{corr-B3})}^2$ | $H_{(\text{corr-B3})}^3$ | $E_{(\text{solv, M06})}^4$ | IF <sup>5</sup> |
|---------------------|--------------------------|--------------------------|--------------------------|----------------------------|-----------------|
| <b>(R,S)-TS</b>     | -4224.837456             | 1.057278                 | 1.253668                 | -4223.320381               | 326.35i         |
| <b>(R,R)-TS</b>     | -4224.833453             | 1.056277                 | 1.253795                 | -4223.317726               | 313.95i         |
| <b>(S,R)-TS</b>     | -4224.819943             | 1.055002                 | 1.253119                 | -4223.313514               | 227.69i         |
| <b>(S,S)-TS</b>     | -4224.815116             | 1.055172                 | 1.253309                 | -4223.310020               | 269.03i         |
| <b>(R,S)-TS-II</b>  | -4224.822610             | 1.054981                 | 1.253520                 | -4223.303477               | 341.04i         |
| <b>(R,S)-TS2</b>    | -4224.836034             | 1.055585                 | 1.251349                 | -4223.323011               | 218.11i         |
| <b>I</b>            | -3478.600656             | 0.850089                 | 1.012213                 | -3477.407463               | -               |
| <b>(R,S)-II</b>     | -4224.839988             | 1.059184                 | 1.255204                 | -4223.328724               | -               |
| <b>(S)-III</b>      | -4224.867259             | 1.058267                 | 1.255826                 | -4223.356108               | -               |
| <b>2a</b>           | -746.260011              | 0.180539                 | 0.240081                 | -745.918135                | -               |
| <b>(S,R)-3b-(E)</b> | -1684.500785             | 0.452774                 | 0.556429                 | -1683.772500               | -               |
| <b>(S,R)-3b-(Z)</b> | -1684.492408             | 0.451968                 | 0.556531                 | -1683.761263               | -               |
| <b>(S,S)-3b-(E)</b> | -1684.495472             | 0.453354                 | 0.556316                 | -1683.769379               | -               |
| <b>(S)-4a-(E)</b>   | -1790.450200             | 0.379823                 | 0.479381                 | -1789.827674               | -               |
| <b>(S)-4a-(Z)</b>   | -1790.448115             | 0.379014                 | 0.479535                 | -1789.826573               | -               |

<sup>1</sup>The electronic energy calculated by B3LYP in gas phase. <sup>2</sup>The thermal correction to Gibbs free energy calculated by B3LYP in gas phase. <sup>3</sup>The thermal correction to enthalpy calculated by B3LYP in gas phase. <sup>4</sup>The electronic energy calculated by M06 in 1,4-Dioxane solvent. <sup>5</sup>The B3LYP calculated imaginary frequencies for the transition states.

### 2) Geometries for All Optimized Structures

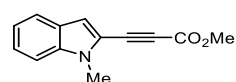

|   |             |             |             |
|---|-------------|-------------|-------------|
| C | -3.74720300 | -1.51224600 | -0.00002500 |
| N | -0.98851000 | 0.79083400  | 0.00004500  |
| C | -4.85066500 | -0.67407700 | -0.00001300 |
| C | -0.25916800 | -0.40538100 | 0.00000000  |
| C | -4.69908000 | 0.73179300  | 0.00002500  |
| C | -1.13888700 | -1.47707800 | 0.00001400  |
| C | -3.44450300 | 1.32628400  | 0.00005200  |
| C | -0.43724700 | 2.13231600  | -0.00009700 |
| C | -2.32717400 | 0.47816900  | 0.00003700  |
| C | 1.14628300  | -0.42362000 | -0.00002200 |
| C | -2.45800500 | -0.94290800 | -0.00000400 |
| C | 2.36322500  | -0.42533200 | -0.00002700 |

|   |             |             |             |    |             |             |             |
|---|-------------|-------------|-------------|----|-------------|-------------|-------------|
| C | 3.79930500  | -0.51669000 | -0.00001200 | H  | -8.78865100 | 2.16020100  | -0.17499500 |
| O | 4.42542000  | -1.55813000 | -0.00001000 | H  | -6.73446200 | 3.49986900  | -0.51525000 |
| O | 4.36430900  | 0.71345500  | 0.00001700  | H  | -6.47083000 | -1.30964500 | 0.90402500  |
| C | 5.80138700  | 0.71563400  | 0.00003700  | H  | -3.51163500 | -0.77013700 | 0.81519500  |
| H | -5.85048100 | -1.09887800 | -0.00003400 | H  | -4.58317700 | 4.06288900  | -1.20434800 |
| H | -5.58490300 | 1.36095200  | 0.00003300  | H  | -3.79328200 | 4.35699200  | 0.36437800  |
| H | -3.33649100 | 2.40682500  | 0.00009000  | H  | -2.85710600 | 3.71894000  | -1.00777600 |
| H | -3.86917700 | -2.59204700 | -0.00003400 | H  | -0.01466100 | 6.14557100  | -1.80706400 |
| H | -0.84575100 | -2.51738300 | 0.00001300  | H  | -0.64120700 | 6.37745000  | -0.14035600 |
| H | -0.75767300 | 2.68330500  | -0.89181500 | H  | 1.04536000  | 5.85867200  | -0.38816900 |
| H | -0.75810700 | 2.68363800  | 0.89125900  | Pd | 0.02868900  | 0.52794000  | 0.14339500  |
| H | 0.65165200  | 2.06496300  | 0.00019400  | P  | -0.40991000 | -1.82034300 | -0.02219200 |
| H | 6.08858700  | 1.76748400  | 0.00002100  | P  | 2.40934600  | 0.73196500  | 0.05543200  |
| H | 6.18722200  | 0.21077700  | 0.88983000  | C  | 0.88722400  | -3.03707400 | -0.55992100 |
| H | 6.18724600  | 0.21074200  | -0.88972600 | C  | 0.93878500  | -3.51776100 | -1.87718800 |
|   |             |             |             | C  | 1.88175700  | -3.45186300 | 0.34277700  |
|   |             |             |             | C  | 1.94781200  | -4.39676000 | -2.27664500 |
|   |             |             |             | H  | 0.18437900  | -3.21438600 | -2.59553800 |
|   |             |             |             | C  | 2.88419600  | -4.33628200 | -0.05571300 |
|   |             |             |             | H  | 1.87110300  | -3.09447300 | 1.36727700  |
|   |             |             |             | C  | 2.92009400  | -4.81409800 | -1.36755700 |
|   |             |             |             | H  | 1.96576400  | -4.75999100 | -3.30088000 |
|   |             |             |             | H  | 3.63610000  | -4.65243200 | 0.66286300  |
|   |             |             |             | H  | 3.69910200  | -5.50587200 | -1.67728300 |
|   |             |             |             | C  | -1.77012100 | -2.17378300 | -1.23187600 |
|   |             |             |             | C  | -2.59629200 | -3.30546500 | -1.15660200 |
|   |             |             |             | C  | -1.95699400 | -1.27017100 | -2.28895300 |
|   |             |             |             | C  | -3.58415900 | -3.52676700 | -2.11713000 |
|   |             |             |             | H  | -2.48135200 | -4.01228900 | -0.34121700 |
|   |             |             |             | C  | -2.93622500 | -1.49953700 | -3.25732400 |
|   |             |             |             | H  | -1.34295400 | -0.37483500 | -2.33733600 |
|   |             |             |             | C  | -3.75374400 | -2.62716100 | -3.17191500 |
|   |             |             |             | H  | -4.22333600 | -4.40245900 | -2.03928100 |
|   |             |             |             | H  | -3.06966300 | -0.78754100 | -4.06741200 |
|   |             |             |             | H  | -4.52559700 | -2.80003200 | -3.91713300 |

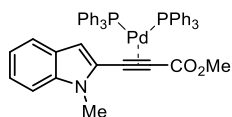



|   |             |             |             |    |             |             |             |
|---|-------------|-------------|-------------|----|-------------|-------------|-------------|
| H | 3.87771300  | -3.11229500 | -0.18679500 | C  | -3.44396500 | -2.49018000 | -3.55631600 |
| H | 1.13645100  | -1.90829300 | -0.12791700 | C  | -4.71395500 | -3.03438500 | -3.72192100 |
| H | 3.49290200  | 2.91024000  | 0.30040600  | O  | -0.93946300 | -1.40841400 | -3.24261500 |
| H | 2.08804000  | 2.99451600  | -0.77998000 | H  | 5.00196100  | -4.77592400 | 3.90421900  |
| H | 1.86251700  | 2.89027400  | 0.98426600  | H  | 6.63483900  | -4.40802200 | 2.07851900  |
| H | -0.06580700 | 1.90898800  | 0.07654200  | H  | 5.92407700  | -3.45305500 | -0.09385100 |
| H | -1.12660600 | -0.94673900 | -0.07573200 | H  | 2.60621800  | -4.20729800 | 3.59811200  |
| H | -7.14426200 | -1.73267900 | 0.00629200  | H  | 0.68388000  | -3.06604800 | 1.57143100  |
| H | -5.05689300 | -3.01241200 | 0.43308800  | H  | 4.84889200  | -2.14587200 | -1.67793100 |
| H | -2.88096700 | -1.87063000 | 0.43902800  | H  | 3.83901300  | -3.39772900 | -2.44329600 |
| H | -4.81578100 | 1.87265500  | -0.39165800 | H  | 3.29700600  | -1.70175200 | -2.38113400 |
| H | -7.03003200 | 0.71841100  | -0.40752400 | H  | 1.23159900  | -1.75914600 | -2.16271300 |
|   |             |             |             | H  | -0.88814100 | -2.95801700 | -0.31076800 |
|   |             |             |             | H  | -6.30316900 | -4.17287600 | -2.80351700 |
|   |             |             |             | H  | -5.09054800 | -4.44444500 | -0.64779900 |
|   |             |             |             | H  | -2.85425300 | -3.48563300 | -0.35153400 |
|   |             |             |             | H  | -2.95947300 | -1.93967900 | -4.35552700 |
|   |             |             |             | H  | -5.23907600 | -2.90789600 | -4.66530200 |
|   |             |             |             | Pd | -0.07767400 | -0.26442900 | -0.25158300 |
|   |             |             |             | P  | -1.91287900 | 0.47299500  | 1.07507300  |
|   |             |             |             | P  | 1.52826100  | 1.45443700  | -0.68073700 |
|   |             |             |             | C  | -1.52320600 | 1.12864300  | 2.76780000  |
|   |             |             |             | C  | -2.50627400 | 1.28654200  | 3.76117600  |
|   |             |             |             | C  | -0.19306000 | 1.43780800  | 3.08717800  |
|   |             |             |             | C  | -2.16930000 | 1.77283200  | 5.02443900  |
|   |             |             |             | H  | -3.53647800 | 1.01288700  | 3.55229800  |
|   |             |             |             | C  | 0.14573300  | 1.92135000  | 4.35391800  |
|   |             |             |             | H  | 0.58426700  | 1.28002600  | 2.34668500  |
|   |             |             |             | C  | -0.84236000 | 2.09551300  | 5.32275400  |
|   |             |             |             | H  | -2.94209800 | 1.89082700  | 5.77970400  |
| C | 4.66167800  | -4.35282100 | 2.96269900  |    |             |             |             |
| C | 5.59248200  | -4.14237700 | 1.92415000  |    |             |             |             |
| C | 5.20033600  | -3.60411400 | 0.70167400  |    |             |             |             |
| C | 3.85021400  | -3.27198700 | 0.53857400  |    |             |             |             |
| C | 2.89099300  | -3.49176200 | 1.57007800  |    |             |             |             |
| C | 3.31972300  | -4.03460400 | 2.79603600  |    |             |             |             |
| N | 3.19406600  | -2.71395000 | -0.54462600 |    |             |             |             |
| C | 1.83316600  | -2.59988400 | -0.23959400 |    |             |             |             |
| C | 1.63259200  | -3.06470600 | 1.05287900  |    |             |             |             |
| C | 3.82141200  | -2.48426100 | -1.83403000 |    |             |             |             |
| C | 0.86867800  | -2.03662900 | -1.17963500 |    |             |             |             |
| C | -0.52169900 | -2.28643200 | -1.07849500 |    |             |             |             |
| C | -1.36027300 | -2.05306300 | -2.27109400 |    |             |             |             |
| C | -5.31174000 | -3.74525300 | -2.67665600 |    |             |             |             |
| C | -4.63030700 | -3.90248600 | -1.46908000 |    |             |             |             |
| C | -3.35505600 | -3.35953400 | -1.30442000 |    |             |             |             |
| C | -2.74430200 | -2.64631100 | -2.34727700 |    |             |             |             |

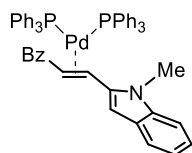

|   |             |             |             |                 |             |             |             |
|---|-------------|-------------|-------------|-----------------|-------------|-------------|-------------|
| H | 1.18390900  | 2.14952200  | 4.57960800  | H               | 3.18308100  | 3.79038200  | 0.30324600  |
| H | -0.58107700 | 2.46815000  | 6.30973400  | C               | 4.84040800  | 1.87410400  | 2.57446800  |
| C | -3.17644800 | -0.80825900 | 1.53304100  | H               | 4.50385300  | -0.23701800 | 2.89145800  |
| C | -4.53836000 | -0.70781000 | 1.22061300  | H               | 4.93847900  | 3.96094400  | 2.03316200  |
| C | -2.72772500 | -1.94063400 | 2.23612100  | H               | 5.61286900  | 1.95196200  | 3.33520100  |
| C | -5.43196000 | -1.71076400 | 1.61024500  | C               | 0.91481100  | 3.18755200  | -0.94076600 |
| H | -4.90845500 | 0.15411700  | 0.67491700  | C               | 1.14317600  | 3.90814300  | -2.12277700 |
| C | -3.62001000 | -2.93577600 | 2.63140700  | C               | 0.16785700  | 3.79782400  | 0.08158100  |
| H | -1.67259400 | -2.03618200 | 2.48271800  | C               | 0.63924200  | 5.20269800  | -2.27655000 |
| C | -4.97893500 | -2.82278800 | 2.31918500  | H               | 1.71658100  | 3.46355000  | -2.92875900 |
| H | -6.48516300 | -1.61614400 | 1.35884500  | C               | -0.32460500 | 5.09302200  | -0.06873500 |
| H | -3.25613100 | -3.79916200 | 3.18265900  | H               | -0.02957500 | 3.26079400  | 1.00412000  |
| H | -5.67629300 | -3.59751800 | 2.62698300  | C               | -0.09301300 | 5.80007800  | -1.25122000 |
| C | -2.92655800 | 1.78757100  | 0.25766200  | H               | 0.82541000  | 5.74270300  | -3.20142300 |
| C | -3.04839500 | 1.71248000  | -1.14091000 | H               | -0.89971800 | 5.54468800  | 0.73496300  |
| C | -3.55934100 | 2.84100200  | 0.93435200  | H               | -0.48370300 | 6.80704600  | -1.37195600 |
| C | -3.80260500 | 2.65500300  | -1.84049900 | C               | 2.50286700  | 1.16207600  | -2.23123600 |
| H | -2.53974700 | 0.91920900  | -1.68309600 | C               | 3.86615600  | 1.47349900  | -2.35271100 |
| C | -4.30336100 | 3.79061300  | 0.23042300  | C               | 1.83153700  | 0.60932000  | -3.33660100 |
| H | -3.46702100 | 2.93119900  | 2.01173500  | C               | 4.54368900  | 1.23852100  | -3.55165100 |
| C | -4.43078000 | 3.69785200  | -1.15653700 | H               | 4.40413100  | 1.89774700  | -1.51083400 |
| H | -3.88726300 | 2.57965100  | -2.92122000 | C               | 2.51007700  | 0.38693400  | -4.53723000 |
| H | -4.78357300 | 4.60362800  | 0.76921300  | H               | 0.78578200  | 0.32266800  | -3.25562100 |
| H | -5.01021900 | 4.43801700  | -1.70211800 | C               | 3.86759000  | 0.69829800  | -4.64756500 |
| C | 2.84067500  | 1.67753000  | 0.60742700  | H               | 5.60075400  | 1.48086400  | -3.62765600 |
| C | 3.22177800  | 0.55116600  | 1.35627400  | H               | 1.97551200  | -0.04381800 | -5.37962300 |
| C | 3.47017600  | 2.90633700  | 0.86453100  | H               | 4.39640500  | 0.51624600  | -5.57961100 |
| C | 4.21977900  | 0.64751500  | 2.32800500  | <b>(R,S)-TS</b> |             |             |             |
| H | 2.72887400  | -0.40191500 | 1.18612000  | C               | -3.50881400 | -5.76381000 | -2.78380100 |
| C | 4.46174700  | 3.00258100  | 1.84326500  | C               | -3.16783100 | -6.03820200 | -1.31323300 |

|   |             |             |             |   |             |             |             |
|---|-------------|-------------|-------------|---|-------------|-------------|-------------|
| C | -3.71192800 | -4.92188400 | -0.41325200 | H | -3.08101800 | -6.53782100 | -3.43254700 |
| C | -3.19639800 | -3.53199300 | -0.83770300 | H | -2.07613200 | -6.10554200 | -1.19786100 |
| C | -3.51315400 | -3.24877800 | -2.32030700 | H | -3.57541100 | -7.00679000 | -0.99906000 |
| C | -2.99599900 | -4.38511000 | -3.22134000 | H | -3.43277000 | -5.08790700 | 0.63268000  |
| N | -3.78386400 | -2.48849100 | 0.00234300  | H | -4.81066700 | -4.91420600 | -0.45546100 |
| N | -2.95018200 | -1.98645700 | -2.80214000 | H | -2.10801300 | -3.50261500 | -0.70284000 |
| C | -3.22847700 | -2.15492100 | 1.19468900  | H | -4.60365400 | -3.16947700 | -2.42660300 |
| O | -2.23020400 | -2.71949500 | 1.65628100  | H | -3.28556100 | -4.17321900 | -4.25755900 |
| C | -3.54397300 | -0.78025100 | -2.64889000 | H | -1.89634400 | -4.38039200 | -3.19425200 |
| O | -4.56059400 | -0.59002600 | -1.96604800 | C | -6.23150600 | 3.67842100  | 0.27208500  |
| H | -4.38533400 | -1.80656900 | -0.46332300 | C | -6.15536100 | 3.08036700  | -0.98564200 |
| H | -2.00484600 | -1.99584100 | -3.18909800 | C | -4.95680200 | 2.51789700  | -1.42991600 |
| C | -5.46039000 | 0.68099200  | 3.54279600  | C | -3.81521700 | 2.54186200  | -0.61616300 |
| C | -4.07724100 | 0.83355700  | 3.42119500  | C | -3.90545900 | 3.13443800  | 0.65478300  |
| C | -3.30442400 | -0.05102300 | 2.65683600  | C | -5.10089900 | 3.70412000  | 1.09136900  |
| C | -3.97030300 | -1.10243400 | 1.98007800  | H | -7.16422200 | 4.12044100  | 0.61263500  |
| C | -5.35895200 | -1.23999200 | 2.10146900  | H | -7.02983100 | 3.05023000  | -1.63028200 |
| C | -6.10655900 | -0.35892900 | 2.88218400  | H | -4.92128300 | 2.04878000  | -2.40495800 |
| H | -6.02547200 | 1.38221100  | 4.15088700  | H | -3.03584100 | 3.16924700  | 1.30344500  |
| H | -3.59994400 | 1.66483900  | 3.92602400  | H | -5.14687500 | 4.16683400  | 2.07370000  |
| P | -1.48335400 | 0.23641100  | 2.39663500  | C | 0.69563500  | 5.50208300  | -1.13948000 |
| H | -5.84993600 | -2.06120400 | 1.58839800  | C | 1.19629800  | 4.19845800  | -1.12305200 |
| H | -7.18188500 | -0.48696500 | 2.96862700  | C | 0.31444200  | 3.11552100  | -1.12798800 |
| C | -2.12986800 | 2.32399000  | -5.27363800 | C | -1.07742600 | 3.31567000  | -1.14724000 |
| C | -2.02547000 | 2.51456300  | -3.89491300 | C | -1.56719500 | 4.63278700  | -1.16771000 |
| C | -2.43762000 | 1.53310700  | -2.97782100 | C | -0.68519400 | 5.71593800  | -1.16407400 |
| C | -2.95516000 | 0.32437100  | -3.49514400 | H | 1.37727800  | 6.34885300  | -1.13086100 |
| C | -3.03702600 | 0.13388900  | -4.88219300 | H | 2.26265700  | 3.99506600  | -1.08672800 |
| C | -2.63658900 | 1.12663900  | -5.77402700 | H | 0.72742300  | 2.11271200  | -1.10189300 |
| H | -1.81107900 | 3.11338100  | -5.94907800 | H | -2.63654000 | 4.81662700  | -1.18372200 |
| H | -1.61167300 | 3.44657400  | -3.52948700 | H | -1.08125300 | 6.72831600  | -1.17858100 |
| P | -2.19080900 | 1.82676900  | -1.14639200 | C | 0.72098200  | -2.43886700 | 5.51095100  |
| H | -3.43112600 | -0.80570700 | -5.25787500 | C | 1.42487800  | -1.56121700 | 4.68310200  |
| H | -2.71945000 | 0.96296900  | -6.84493500 | C | 0.74162900  | -0.79403700 | 3.73888000  |
| H | -4.59921600 | -5.80867700 | -2.91923700 | C | -0.65208100 | -0.89224000 | 3.60929100  |



|    |             |             |             |   |             |             |             |
|----|-------------|-------------|-------------|---|-------------|-------------|-------------|
| C  | -1.34978600 | -1.77641000 | 4.44191100  | H | 6.44323300  | -2.28951600 | 3.77210600  |
| C  | -0.66547900 | -2.54344000 | 5.38727300  | H | 5.15000100  | -4.38296500 | 4.04185100  |
| H  | 1.25100100  | -3.03683600 | 6.24770000  | H | 3.01216800  | -4.72226300 | 2.82060600  |
| H  | 2.50444400  | -1.47610800 | 4.76483100  | H | 5.65505600  | -0.49722700 | 2.24585200  |
| H  | 1.29928100  | -0.10957100 | 3.10468600  | H | 3.08889900  | 0.30554100  | 0.74126300  |
| H  | -2.42506800 | -1.87600800 | 4.34934400  | H | 1.14510300  | -4.45334000 | 0.29975900  |
| H  | -1.22085600 | -3.22469200 | 6.02698800  | H | 0.87218100  | -4.20064700 | 2.04748100  |
| C  | -0.44008500 | 4.27185600  | 4.50573600  | H | -0.04653300 | -3.24312500 | 0.88320000  |
| C  | -0.90226100 | 3.19378100  | 5.26738100  | H | 2.06440500  | 1.10942100  | -4.97557300 |
| C  | -1.22943200 | 1.98773000  | 4.64969900  | H | 1.77111300  | -0.64923200 | -5.17590600 |
| C  | -1.11951300 | 1.84358500  | 3.25391200  | H | 0.39829300  | 0.49161300  | -5.24168100 |
| C  | -0.63643400 | 2.92536400  | 2.50572600  | C | 4.12381200  | -0.68726800 | -0.97292700 |
| C  | -0.30109300 | 4.13325400  | 3.12573000  | C | 5.21250900  | 0.25605000  | -0.78814800 |
| H  | -0.17713300 | 5.20811100  | 4.99093700  | C | 4.83648700  | 1.64545500  | -0.65709900 |
| H  | -0.99575500 | 3.28852600  | 6.34608900  | O | 3.62693600  | 1.96452800  | -0.55214400 |
| H  | -1.55688300 | 1.14903400  | 5.25726300  | C | 4.36015500  | -2.07762900 | -1.47908700 |
| H  | -0.50066600 | 2.82011100  | 1.43537400  | C | 5.29715700  | -2.96683800 | -0.92483900 |
| H  | 0.07622200  | 4.95467900  | 2.52314200  | C | 5.45695500  | -4.24977100 | -1.44981700 |
| Pd | -0.91750100 | 0.15207500  | 0.05165100  | C | 4.68964300  | -4.67534000 | -2.53579500 |
| C  | 5.51218300  | -2.41709700 | 3.22756100  | C | 3.75691300  | -3.80286600 | -3.09909800 |
| C  | 4.77883800  | -3.60469300 | 3.38099300  | C | 3.59548200  | -2.52180900 | -2.57177600 |
| C  | 3.57757700  | -3.80409800 | 2.69886300  | C | 6.54593100  | -0.17594200 | -0.58953900 |
| C  | 3.14040400  | -2.77490600 | 1.86702300  | N | 7.64486800  | -0.54106000 | -0.42013100 |
| C  | 3.87403200  | -1.58451400 | 1.67732700  | C | 5.86161300  | 2.74542900  | -0.60742000 |
| C  | 5.07044600  | -1.40200300 | 2.37594700  | C | 5.55561200  | 3.88815400  | 0.14936700  |
| N  | 1.95769300  | -2.68741600 | 1.11529800  | C | 6.44060400  | 4.96210600  | 0.20826900  |
| C  | 1.92850000  | -1.50454100 | 0.45375300  | C | 7.63945600  | 4.92012000  | -0.50933700 |
| C  | 3.16541300  | -0.77908300 | 0.67410300  | C | 7.94409700  | 3.79766000  | -1.28122600 |
| C  | 0.92161700  | -3.70984500 | 1.07343600  | C | 7.06444000  | 2.71492900  | -1.32839700 |
| C  | 0.83840600  | -1.03633800 | -0.31541600 | H | 3.30682600  | -0.19914800 | -1.50053400 |
| C  | 0.31433300  | -0.65073700 | -1.41789600 | H | 5.90956400  | -2.65907600 | -0.08711400 |
| C  | 0.41839300  | -0.71345000 | -2.86834300 | H | 6.19091200  | -4.91760800 | -1.00663900 |
| O  | -0.18186000 | -1.50309800 | -3.58773500 | H | 4.82113700  | -5.67497700 | -2.94205500 |
| O  | 1.24680000  | 0.22893900  | -3.35230300 | H | 3.15649600  | -4.11477200 | -3.94998300 |
| C  | 1.37081600  | 0.29051700  | -4.78711900 | H | 2.88045100  | -1.84226700 | -3.02464100 |

|                 |             |             |             |   |             |             |             |
|-----------------|-------------|-------------|-------------|---|-------------|-------------|-------------|
| H               | 4.61399400  | 3.91285200  | 0.68872100  | C | -2.04212700 | 4.11530600  | 3.13969200  |
| H               | 6.19626700  | 5.83355900  | 0.81085600  | C | -2.08915900 | 3.94638700  | 4.52176100  |
| H               | 8.33029800  | 5.75858000  | -0.46868300 | H | -2.44572400 | 2.53777400  | 6.11731200  |
| H               | 8.86954500  | 3.76187600  | -1.85000100 | H | -2.88588700 | 0.65670700  | 4.61110500  |
| H               | 7.31352600  | 1.85124500  | -1.93442300 | P | -2.87911200 | 0.28961200  | 1.68350700  |
| <b>(R,R)-TS</b> |             |             |             | H | -1.79534600 | 5.08561600  | 2.71950600  |
| C               | 0.38940800  | 6.24071600  | -2.24605900 | H | -1.88192300 | 4.78515500  | 5.18044700  |
| C               | 0.58595900  | 5.24081700  | -3.39302000 | H | -0.46791400 | 6.89115900  | -2.47307300 |
| C               | -0.60697600 | 4.28134200  | -3.48693700 | H | 1.26300100  | 6.89672300  | -2.14930600 |
| C               | -0.85731700 | 3.53893500  | -2.15897800 | H | 1.50801000  | 4.66623300  | -3.22242700 |
| C               | -1.03973400 | 4.53082400  | -0.99236700 | H | 0.71883300  | 5.76933800  | -4.34492500 |
| C               | 0.14265500  | 5.51427900  | -0.91695500 | H | -0.45172100 | 3.53645300  | -4.27452000 |
| N               | -2.03507700 | 2.67531900  | -2.26722100 | H | -1.51514400 | 4.84321800  | -3.74919400 |
| N               | -1.17687500 | 3.87586900  | 0.30896100  | H | 0.00954900  | 2.90386700  | -1.93963100 |
| C               | -1.93911800 | 1.43176800  | -2.79705000 | H | -1.96868100 | 5.09174300  | -1.16372600 |
| O               | -0.88513200 | 0.96530600  | -3.24506400 | H | -0.04769900 | 6.23258900  | -0.11061200 |
| C               | -2.34122700 | 3.39343300  | 0.79630100  | H | 1.04632500  | 4.95520200  | -0.63355300 |
| O               | -3.39407800 | 3.32217000  | 0.14429500  | C | -7.42598800 | 0.40199500  | 0.64736000  |
| H               | -2.82368100 | 2.89126000  | -1.65394400 | C | -6.85020400 | 1.47678700  | 1.32512700  |
| H               | -0.33052900 | 3.66513400  | 0.84456100  | C | -5.48947800 | 1.46776200  | 1.63752300  |
| C               | -5.61445700 | -0.71797400 | -3.41131300 | C | -4.68248700 | 0.38136200  | 1.27036300  |
| C               | -4.52494900 | -1.37628800 | -2.83542200 | C | -5.26866700 | -0.68993000 | 0.57690600  |
| C               | -3.31683500 | -0.71314100 | -2.58117900 | C | -6.63018100 | -0.68302300 | 0.27475300  |
| C               | -3.22994700 | 0.66134000  | -2.91196900 | H | -8.48631900 | 0.41013400  | 0.40878900  |
| C               | -4.33347500 | 1.31569300  | -3.47284400 | H | -7.45872000 | 2.32935600  | 1.61480800  |
| C               | -5.52329400 | 0.63387700  | -3.72751300 | H | -5.05875000 | 2.31516100  | 2.15600500  |
| H               | -6.53222700 | -1.26732800 | -3.60353200 | H | -4.66655000 | -1.54363400 | 0.28288100  |
| H               | -4.62913400 | -2.42277100 | -2.57384200 | H | -7.06582700 | -1.52485600 | -0.25655100 |
| P               | -1.91839900 | -1.55791200 | -1.68391000 | C | -2.65722400 | -3.19560300 | 4.79665100  |
| H               | -4.24309400 | 2.36665100  | -3.73017900 | C | -1.50009300 | -2.67389000 | 4.21286200  |
| H               | -6.36590300 | 1.15707400  | -4.17078100 | C | -1.58928100 | -1.63592500 | 3.28473900  |
| C               | -2.40115400 | 2.69306800  | 5.04266500  | C | -2.83767600 | -1.09515100 | 2.92793400  |
| C               | -2.65723600 | 1.62459400  | 4.18183700  | C | -3.99252400 | -1.62060600 | 3.52834900  |
| C               | -2.62222900 | 1.77582800  | 2.78567700  | C | -3.90164600 | -2.66519500 | 4.45246000  |
| C               | -2.31281300 | 3.05240600  | 2.26730800  | H | -2.58894100 | -4.00871900 | 5.51447600  |

|    |             |             |             |   |            |             |             |
|----|-------------|-------------|-------------|---|------------|-------------|-------------|
| H  | -0.52550400 | -3.07912900 | 4.47175700  | C | 2.94537000 | -1.83863800 | 0.14166300  |
| H  | -0.68517700 | -1.24452200 | 2.82787900  | C | 2.32450300 | 0.65126600  | -2.51584500 |
| H  | -4.96747800 | -1.21796700 | 3.27571600  | C | 1.07139300 | -0.10336700 | 0.11546700  |
| H  | -4.80764400 | -3.06072300 | 4.90431800  | C | 0.59064500 | 0.60999100  | 1.06578400  |
| C  | 0.94384700  | -3.19661700 | -4.97374500 | C | 1.00883600 | 1.56621100  | 2.08573300  |
| C  | 1.19247500  | -3.42764200 | -3.61894800 | O | 0.87546800 | 2.77841100  | 2.01804700  |
| C  | 0.33608000  | -2.89795200 | -2.65321500 | O | 1.53437600 | 0.95323600  | 3.16625200  |
| C  | -0.77876400 | -2.13253800 | -3.02650800 | C | 2.04392500 | 1.83616100  | 4.18485400  |
| C  | -1.01819400 | -1.90230000 | -4.38718700 | H | 5.87845400 | -4.57938600 | -2.42311900 |
| C  | -0.16123100 | -2.43335900 | -5.35363800 | H | 5.76551900 | -2.89766600 | -4.23387900 |
| H  | 1.61064300  | -3.60659000 | -5.72768800 | H | 4.32692100 | -0.88818500 | -4.01629700 |
| H  | 2.05662400  | -4.00894500 | -3.31104100 | H | 4.61087100 | -4.24973900 | -0.30860200 |
| H  | 0.53717300  | -3.08607300 | -1.60158700 | H | 2.39239400 | -2.50133800 | 0.79935000  |
| H  | -1.86549900 | -1.30052100 | -4.69531200 | H | 2.61221200 | 0.45509700  | -3.54913700 |
| H  | -0.35926800 | -2.24537900 | -6.40585300 | H | 1.24337900 | 0.80251100  | -2.48209000 |
| C  | -3.57751600 | -5.73690800 | -0.40165600 | H | 2.84318900 | 1.54080400  | -2.14307500 |
| C  | -3.39537900 | -5.45188600 | -1.75843400 | H | 2.43295100 | 1.18092100  | 4.96442600  |
| C  | -2.90897500 | -4.20689600 | -2.15501400 | H | 2.84047000 | 2.45859100  | 3.77074100  |
| C  | -2.61048200 | -3.21549700 | -1.20171600 | H | 1.24375900 | 2.47051500  | 4.57393600  |
| C  | -2.78063200 | -3.52185400 | 0.15508400  | C | 4.07773200 | -1.02172700 | 1.40960700  |
| C  | -3.26398800 | -4.77182600 | 0.55418800  | C | 5.12064400 | -0.19422700 | 0.81903700  |
| H  | -3.94993600 | -6.71074000 | -0.09482400 | C | 4.75593600 | 1.16670100  | 0.50791600  |
| H  | -3.62240400 | -6.20452000 | -2.50898800 | O | 3.55889800 | 1.53551300  | 0.59308200  |
| H  | -2.74727700 | -4.00913600 | -3.21056300 | C | 4.38384000 | -2.14134800 | 2.36861900  |
| H  | -2.51755900 | -2.78654200 | 0.90680800  | C | 5.43257300 | -3.06491200 | 2.22284400  |
| H  | -3.38455100 | -4.98443900 | 1.61286700  | C | 5.62419500 | -4.07656400 | 3.16680000  |
| Pd | -1.06900900 | -0.22020400 | 0.14372400  | C | 4.77799400 | -4.19256700 | 4.27047900  |
| C  | 5.25192200  | -3.70090100 | -2.29989300 | C | 3.73151800 | -3.28133600 | 4.42792600  |
| C  | 5.18551300  | -2.74973400 | -3.32749900 | C | 3.53760300 | -2.27224200 | 3.48566900  |
| C  | 4.38104600  | -1.61413200 | -3.21208500 | C | 6.37367800 | -0.73404200 | 0.44547100  |
| C  | 3.65340700  | -1.46786500 | -2.03387800 | N | 7.40256800 | -1.19948900 | 0.13702800  |
| C  | 3.74302000  | -2.38653900 | -0.97019100 | C | 5.76739800 | 2.19572600  | 0.06677300  |
| C  | 4.53983500  | -3.52213600 | -1.11087100 | C | 5.29081400 | 3.28831900  | -0.67678900 |
| N  | 2.68942900  | -0.49483900 | -1.69551100 | C | 6.14945200 | 4.30186200  | -1.09468800 |
| C  | 2.19142800  | -0.74655400 | -0.46909800 | C | 7.50413600 | 4.25460300  | -0.75428500 |

|                 |             |             |             |   |             |             |             |
|-----------------|-------------|-------------|-------------|---|-------------|-------------|-------------|
| C               | 7.98488500  | 3.19009600  | 0.00938100  | H | 5.83640400  | 1.95477700  | -0.63135200 |
| C               | 7.12607500  | 2.16783400  | 0.41740600  | P | 3.42402600  | 0.33921700  | -1.22251900 |
| H               | 3.32400800  | -0.36730900 | 1.83914900  | H | 5.28421500  | -1.10366400 | 3.20524900  |
| H               | 6.11460800  | -2.98765200 | 1.38593900  | H | 7.11385800  | 0.57096100  | 3.21879100  |
| H               | 6.44756600  | -4.77435600 | 3.03725200  | C | -3.24878000 | 2.16595700  | 2.71827300  |
| H               | 4.93490200  | -4.98078200 | 5.00225900  | C | -2.09280700 | 2.41672900  | 1.97335800  |
| H               | 3.06936000  | -3.35210400 | 5.28759700  | C | -0.92882500 | 1.65388500  | 2.14095700  |
| H               | 2.72471700  | -1.56082200 | 3.61467900  | C | -0.96357100 | 0.59067100  | 3.07688400  |
| H               | 4.23025500  | 3.33021300  | -0.90237800 | C | -2.12819300 | 0.34567200  | 3.81626300  |
| H               | 5.76307300  | 5.13329900  | -1.67946200 | C | -3.26785400 | 1.13330800  | 3.64974600  |
| H               | 8.17737200  | 5.04565200  | -1.07524500 | H | -4.13123900 | 2.77502200  | 2.54634600  |
| H               | 9.03338300  | 3.15245300  | 0.29327600  | H | -2.12343800 | 3.20047500  | 1.22821500  |
| H               | 7.52049800  | 1.35528800  | 1.01507500  | P | 0.56219100  | 1.98673900  | 1.06548700  |
| <b>(S,R)-TS</b> |             |             |             | H | -2.13155900 | -0.46114500 | 4.54407200  |
| C               | 1.01226800  | -5.04832600 | 4.65364200  | H | -4.15934200 | 0.93001300  | 4.23598200  |
| C               | 2.02789300  | -5.41186900 | 3.56346100  | H | 1.54741400  | -4.77328100 | 5.57370200  |
| C               | 2.87163800  | -4.18915400 | 3.18597800  | H | 0.38119200  | -5.90954500 | 4.90456500  |
| C               | 2.00916200  | -2.99478200 | 2.72575000  | H | 1.49692400  | -5.78545800 | 2.67544900  |
| C               | 0.93795700  | -2.64009100 | 3.78122700  | H | 2.67834800  | -6.22709000 | 3.90243200  |
| C               | 0.12687700  | -3.87678700 | 4.20936200  | H | 3.57626700  | -4.42835500 | 2.38305300  |
| N               | 2.86090100  | -1.83210700 | 2.47685400  | H | 3.46713200  | -3.87176100 | 4.05404500  |
| N               | -0.00203500 | -1.61174400 | 3.32441600  | H | 1.50792000  | -3.26217600 | 1.78676100  |
| C               | 3.54823000  | -1.68978800 | 1.31140700  | H | 1.45194300  | -2.22814500 | 4.66005100  |
| O               | 3.48444700  | -2.49760200 | 0.38253400  | H | -0.56429900 | -3.58501500 | 5.00936600  |
| C               | 0.23191900  | -0.27153400 | 3.37705600  | H | -0.49534500 | -4.20201200 | 3.36119500  |
| O               | 1.32564400  | 0.20252500  | 3.70239000  | C | 3.45960500  | 4.36274700  | 3.83886600  |
| H               | 2.69570400  | -1.00493300 | 3.05101700  | C | 2.13861200  | 4.15509500  | 4.24126700  |
| H               | -0.89013500 | -1.91803600 | 2.94860100  | C | 1.26398700  | 3.42565900  | 3.43569100  |
| C               | 6.59476800  | 1.35406400  | 1.27499200  | C | 1.69887700  | 2.89061600  | 2.21382600  |
| C               | 5.71173500  | 1.26696500  | 0.19637900  | C | 3.02543800  | 3.10544100  | 1.81902600  |
| C               | 4.66831400  | 0.32912500  | 0.16977800  | C | 3.90016200  | 3.83720000  | 2.62391900  |
| C               | 4.52421400  | -0.53587900 | 1.28072800  | H | 4.14001900  | 4.92938500  | 4.46918000  |
| C               | 5.40520000  | -0.42606500 | 2.36583800  | H | 1.78594800  | 4.55919700  | 5.18663000  |
| C               | 6.43856500  | 0.50950500  | 2.36999100  | H | 0.24194900  | 3.27081700  | 3.76411100  |
| H               | 7.39765100  | 2.08626700  | 1.25280800  | H | 3.38311400  | 2.70268700  | 0.87879700  |

|    |             |             |             |   |             |             |             |
|----|-------------|-------------|-------------|---|-------------|-------------|-------------|
| H  | 4.92676600  | 3.98570400  | 2.30107800  | C | -5.64964400 | -2.60638700 | 2.18079900  |
| C  | -0.90275500 | 5.37543100  | -1.79360300 | C | -4.99323500 | -3.84324800 | 2.25581200  |
| C  | -1.21519300 | 4.03788400  | -2.04394600 | C | -3.74668300 | -4.03493200 | 1.65442600  |
| C  | -0.77309200 | 3.04034900  | -1.17480800 | C | -3.19053800 | -2.94446900 | 0.98803500  |
| C  | -0.02741800 | 3.36619800  | -0.02992300 | C | -3.83769600 | -1.69892200 | 0.88817800  |
| C  | 0.27115100  | 4.71594000  | 0.22038500  | C | -5.08203500 | -1.52802000 | 1.49565500  |
| C  | -0.16000300 | 5.71135400  | -0.65938500 | N | -1.94890600 | -2.85022400 | 0.33274500  |
| H  | -1.24157000 | 6.15221400  | -2.47420100 | C | -1.77631000 | -1.58412100 | -0.15106500 |
| H  | -1.80998700 | 3.76314300  | -2.90970000 | C | -3.00356900 | -0.82123900 | 0.04314300  |
| H  | -1.03445800 | 2.00787300  | -1.37659800 | C | -1.09247500 | -3.99865200 | 0.07836200  |
| H  | 0.84241700  | 4.99483300  | 1.09889900  | C | -0.56436900 | -1.16479600 | -0.73989200 |
| H  | 0.08162700  | 6.75071800  | -0.45199900 | C | 0.38227600  | -1.38806700 | -1.58255700 |
| C  | 5.10238000  | -2.62620600 | -4.40299600 | C | 0.65688600  | -2.16500000 | -2.79557300 |
| C  | 4.05816100  | -1.75018300 | -4.70988700 | O | 0.51447800  | -1.75094700 | -3.92956900 |
| C  | 3.55142500  | -0.89376000 | -3.73149100 | O | 1.07461600  | -3.41201000 | -2.49231300 |
| C  | 4.08552100  | -0.89849200 | -2.43268700 | C | 1.36585900  | -4.26048400 | -3.61778500 |
| C  | 5.12565500  | -1.78728000 | -2.12989100 | H | -6.61952300 | -2.48737600 | 2.65490800  |
| C  | 5.62924400  | -2.64453500 | -3.11061000 | H | -5.46046000 | -4.66863800 | 2.78538400  |
| H  | 5.50224300  | -3.28915100 | -5.16607300 | H | -3.24627400 | -4.99711500 | 1.70127000  |
| H  | 3.63432700  | -1.72798300 | -5.71024000 | H | -5.60161300 | -0.57865300 | 1.42892400  |
| H  | 2.73945400  | -0.22000600 | -3.98671800 | H | -2.89551100 | 0.23491400  | 0.28893000  |
| H  | 5.53644400  | -1.82161800 | -1.12874600 | H | -0.96789000 | -4.57587400 | 0.99936600  |
| H  | 6.43847800  | -3.32568900 | -2.86045100 | H | -1.54674000 | -4.63950600 | -0.68570400 |
| C  | 4.35321100  | 4.26976900  | -3.57279600 | H | -0.11977800 | -3.66038200 | -0.27581700 |
| C  | 5.23549500  | 3.18843600  | -3.65875100 | H | 1.69876400  | -5.20469200 | -3.18613000 |
| C  | 4.97061200  | 2.00960100  | -2.96317200 | H | 0.46797800  | -4.40853700 | -4.22395700 |
| C  | 3.82163600  | 1.89482000  | -2.15752200 | H | 2.15516500  | -3.81931800 | -4.22934600 |
| C  | 2.94053000  | 2.98149000  | -2.09126900 | C | -3.76764700 | -0.55240200 | -1.59185500 |
| C  | 3.20423900  | 4.16266100  | -2.79094000 | C | -4.99690200 | 0.22293800  | -1.39223800 |
| H  | 4.55828300  | 5.18491200  | -4.12203900 | C | -4.80653500 | 1.58810100  | -0.97692700 |
| H  | 6.12773400  | 3.25970800  | -4.27535100 | O | -3.63886000 | 2.02145000  | -0.80152300 |
| H  | 5.65543900  | 1.17209100  | -3.05423500 | C | -3.78404800 | -1.83705200 | -2.37220200 |
| H  | 2.03236400  | 2.90270000  | -1.50671200 | C | -4.64421700 | -2.91207800 | -2.08996900 |
| H  | 2.50062900  | 4.98762800  | -2.72565800 | C | -4.58369700 | -4.08719500 | -2.84133300 |
| Pd | 1.14164900  | 0.14520300  | -0.45956500 | C | -3.66716000 | -4.21488700 | -3.88736900 |

|                 |             |             |             |   |             |             |             |
|-----------------|-------------|-------------|-------------|---|-------------|-------------|-------------|
| C               | -2.80766300 | -3.15399500 | -4.17951800 | H | 1.30330500  | -1.23939600 | 3.03949900  |
| C               | -2.86595400 | -1.98082600 | -3.42629000 | C | -6.65671300 | 0.45859000  | 1.45142100  |
| C               | -6.26377100 | -0.36739600 | -1.59502900 | C | -5.76467800 | 0.83827400  | 0.44621600  |
| N               | -7.30633600 | -0.87207900 | -1.76739400 | C | -4.42031000 | 1.12859600  | 0.72186800  |
| C               | -5.93735700 | 2.55775000  | -0.73092900 | C | -3.97803800 | 1.01389600  | 2.06224300  |
| C               | -5.62488600 | 3.92448800  | -0.84625300 | C | -4.88003700 | 0.61934000  | 3.06048700  |
| C               | -6.58492200 | 4.90370600  | -0.60628100 | C | -6.21423900 | 0.34375500  | 2.76555700  |
| C               | -7.87819700 | 4.53756300  | -0.22229700 | H | -7.69342000 | 0.25231900  | 1.19853900  |
| C               | -8.19601900 | 3.18634500  | -0.08352000 | H | -6.12844900 | 0.89784000  | -0.57248600 |
| C               | -7.23791600 | 2.20217300  | -0.33784800 | P | -3.22504300 | 1.50845600  | -0.66224300 |
| H               | -2.98723300 | 0.11095400  | -1.96368700 | H | -4.52662200 | 0.55131800  | 4.08457200  |
| H               | -5.37317900 | -2.83112500 | -1.29296600 | H | -6.89668200 | 0.04681900  | 3.55700100  |
| H               | -5.26502000 | -4.90222200 | -2.61097600 | C | 1.46873200  | -4.95137700 | 0.14185600  |
| H               | -3.62950900 | -5.12979100 | -4.47355000 | C | 0.43966100  | -4.15751700 | -0.37156800 |
| H               | -2.08978700 | -3.22921700 | -4.99189000 | C | -0.24048800 | -3.22002900 | 0.42155400  |
| H               | -2.18653300 | -1.16674100 | -3.66215000 | C | 0.17208200  | -3.07996000 | 1.76836900  |
| H               | -4.61155900 | 4.19478900  | -1.12343000 | C | 1.20336200  | -3.88087500 | 2.27621700  |
| H               | -6.32519700 | 5.95402000  | -0.71505100 | C | 1.84661900  | -4.82374000 | 1.47484400  |
| H               | -8.62980300 | 5.29952300  | -0.03106600 | H | 1.97554300  | -5.65569400 | -0.51104700 |
| H               | -9.19603100 | 2.89011100  | 0.22292400  | H | 0.17106400  | -4.27323100 | -1.41404400 |
| H               | -7.51481000 | 1.16148900  | -0.22765100 | P | -1.57471700 | -2.14295400 | -0.33064100 |
| <b>(S,S)-TS</b> |             |             |             | H | 1.49542500  | -3.76687400 | 3.31626600  |
| C               | 0.98547800  | 0.83928700  | 6.47817500  | H | 2.63900800  | -5.44063000 | 1.88881100  |
| C               | 0.34597000  | 2.14461800  | 5.98875800  | H | 0.31918200  | 0.35888300  | 7.20903600  |
| C               | -0.94759100 | 1.85355000  | 5.21992300  | H | 1.93023700  | 1.03709100  | 6.99885700  |
| C               | -0.72525800 | 0.89697500  | 4.02960300  | H | 1.05313300  | 2.67913000  | 5.33728400  |
| C               | -0.02960800 | -0.40589900 | 4.48325000  | H | 0.13842300  | 2.81095800  | 6.83467100  |
| C               | 1.23862100  | -0.11995600 | 5.30809100  | H | -1.39458800 | 2.77563200  | 4.83484400  |
| N               | -2.00696500 | 0.57684000  | 3.40137900  | H | -1.68311000 | 1.39702100  | 5.89782700  |
| N               | 0.34422600  | -1.27806400 | 3.36333500  | H | -0.09136900 | 1.39733400  | 3.28607500  |
| C               | -2.59276000 | 1.42086400  | 2.50893100  | H | -0.74013800 | -0.97192100 | 5.10090200  |
| O               | -2.09278300 | 2.49261300  | 2.16123800  | H | 1.64656800  | -1.07251500 | 5.66762900  |
| C               | -0.49781200 | -2.13785700 | 2.73293200  | H | 2.00204700  | 0.31479400  | 4.64571300  |
| O               | -1.71006300 | -2.19499400 | 2.96684400  | C | -5.54802700 | -4.27625400 | 0.86508700  |
| H               | -2.28536900 | -0.40449200 | 3.39244800  | C | -4.32952900 | -4.84799000 | 1.23422000  |

|   |             |             |             |    |             |             |             |
|---|-------------|-------------|-------------|----|-------------|-------------|-------------|
| C | -3.12745500 | -4.22069100 | 0.90282100  | C  | -3.85666600 | 0.06748900  | -3.00639600 |
| C | -3.12706300 | -3.00867500 | 0.19724900  | C  | -4.55712100 | -0.21197900 | -4.18356100 |
| C | -4.35688200 | -2.44042200 | -0.16484500 | H  | -6.15794800 | 0.39469400  | -5.49505100 |
| C | -5.55784700 | -3.07014100 | 0.16288800  | H  | -6.77760200 | 2.36221000  | -4.10311600 |
| H | -6.48280600 | -4.76603000 | 1.12498800  | H  | -5.52896400 | 2.86565900  | -2.03830500 |
| H | -4.31037700 | -5.78493900 | 1.78477400  | H  | -3.02018400 | -0.55948400 | -2.72214300 |
| H | -2.19114100 | -4.67723900 | 1.20268700  | H  | -4.26247800 | -1.06337700 | -4.79080500 |
| H | -4.38244100 | -1.50387200 | -0.71070600 | Pd | -1.15535800 | 0.27518300  | -0.40438400 |
| H | -6.49940600 | -2.61105600 | -0.12533200 | C  | 5.34856200  | -2.00601700 | 2.84238300  |
| C | -1.28861000 | -3.30604700 | -4.85410500 | C  | 5.42037600  | -0.73970800 | 3.43650700  |
| C | -0.58506000 | -2.21008000 | -4.34899000 | C  | 4.64185600  | 0.32270100  | 2.96863300  |
| C | -0.68044000 | -1.87938600 | -2.99561400 | C  | 3.79940100  | 0.06380400  | 1.88888700  |
| C | -1.47892200 | -2.64047900 | -2.12356400 | C  | 3.73792800  | -1.19066800 | 1.25333600  |
| C | -2.18311700 | -3.73826600 | -2.64416400 | C  | 4.51744800  | -2.23806500 | 1.74160500  |
| C | -2.08763500 | -4.06747500 | -3.99848500 | N  | 2.85432000  | 0.91530200  | 1.28627900  |
| H | -1.21938900 | -3.56097900 | -5.90829400 | C  | 2.17727300  | 0.24799200  | 0.31146400  |
| H | 0.02896900  | -1.60135900 | -5.00718900 | C  | 2.83938700  | -1.03897700 | 0.08545200  |
| H | -0.15216900 | -1.00839400 | -2.61714800 | C  | 2.67822700  | 2.30639500  | 1.66988500  |
| H | -2.81008600 | -4.33862900 | -1.99295800 | C  | 0.97611000  | 0.72225800  | -0.25614900 |
| H | -2.64124300 | -4.92001300 | -4.38336600 | C  | 0.29186700  | 1.67518200  | -0.77231900 |
| C | -3.23146700 | 6.15598200  | -1.05505500 | C  | 0.46587900  | 2.90516400  | -1.55303500 |
| C | -2.69059100 | 5.34531600  | -2.05563000 | O  | 0.21635700  | 3.00545300  | -2.73666900 |
| C | -2.67844700 | 3.95793200  | -1.90597200 | O  | 0.93249600  | 3.91659100  | -0.79002100 |
| C | -3.21044600 | 3.36087800  | -0.75111900 | C  | 1.19211100  | 5.14239300  | -1.49743500 |
| C | -3.74852400 | 4.18089900  | 0.24941100  | H  | 5.96018500  | -2.81461800 | 3.23177800  |
| C | -3.75794300 | 5.56899600  | 0.09608500  | H  | 6.09097000  | -0.57668100 | 4.27522700  |
| H | -3.24411100 | 7.23649100  | -1.17306300 | H  | 4.70209800  | 1.30522500  | 3.42567300  |
| H | -2.28117000 | 5.78802400  | -2.96004000 | H  | 4.48176200  | -3.21487900 | 1.27175300  |
| H | -2.24992000 | 3.34464600  | -2.69151200 | H  | 2.19387900  | -1.86242300 | -0.20014900 |
| H | -4.14949600 | 3.74238400  | 1.15430400  | H  | 2.48094900  | 2.37420000  | 2.74535500  |
| H | -4.18024200 | 6.19017900  | 0.88176100  | H  | 3.58918900  | 2.86584100  | 1.43381800  |
| C | -5.61446300 | 0.60617500  | -4.57792200 | H  | 1.84801400  | 2.73648000  | 1.11392400  |
| C | -5.96332600 | 1.71128700  | -3.79549400 | H  | 1.53854700  | 5.84507700  | -0.73869400 |
| C | -5.26142500 | 1.99140500  | -2.62394600 | H  | 1.96184100  | 4.97987100  | -2.25597300 |
| C | -4.20433100 | 1.16175400  | -2.20424500 | H  | 0.27784700  | 5.50920300  | -1.96898000 |

|                    |             |             |             |   |             |             |             |
|--------------------|-------------|-------------|-------------|---|-------------|-------------|-------------|
| C                  | 3.84592600  | -0.83117200 | -1.44245400 | C | 0.77771400  | 5.41869500  | -1.07409700 |
| C                  | 4.92156800  | 0.15092600  | -1.30022000 | N | -2.40191500 | 3.32838300  | -0.71638500 |
| C                  | 4.54561900  | 1.52892400  | -1.49332100 | N | 0.43948800  | 3.40343200  | 0.24812500  |
| O                  | 3.33786900  | 1.83417000  | -1.63658800 | C | -3.31470800 | 2.55510400  | -1.34675300 |
| C                  | 4.11332700  | -2.24046200 | -1.91127300 | O | -3.33266700 | 2.34876300  | -2.56260600 |
| C                  | 5.19518000  | -3.03596900 | -1.49685400 | C | -0.02032800 | 2.74983000  | 1.33718700  |
| C                  | 5.34831000  | -4.33746500 | -1.98109500 | O | -1.18005800 | 2.86890000  | 1.76915100  |
| C                  | 4.43085300  | -4.87615300 | -2.88491700 | H | -2.29692700 | 3.24419700  | 0.29760000  |
| C                  | 3.35168000  | -4.09669300 | -3.30730800 | H | 1.36215500  | 3.16750600  | -0.13070800 |
| C                  | 3.19838200  | -2.79862200 | -2.82187400 | C | -6.74294400 | 1.36233600  | 0.98217100  |
| C                  | 6.20560900  | -0.20983700 | -0.83291600 | C | -5.90216600 | 0.37206400  | 0.47069800  |
| N                  | 7.26253100  | -0.52343200 | -0.43785400 | C | -4.74523000 | 0.69423100  | -0.25718900 |
| C                  | 5.55336000  | 2.65036800  | -1.49581400 | C | -4.44191200 | 2.05938900  | -0.46060900 |
| C                  | 5.09746700  | 3.92319200  | -1.11376700 | C | -5.28230100 | 3.04395100  | 0.07545600  |
| C                  | 5.95421700  | 5.02150000  | -1.11540300 | C | -6.42977100 | 2.70558800  | 0.79146100  |
| C                  | 7.28176500  | 4.87089900  | -1.52564100 | H | -7.63615900 | 1.07677800  | 1.53170400  |
| C                  | 7.73859700  | 3.61694000  | -1.93436600 | H | -6.15253000 | -0.66683700 | 0.65081900  |
| C                  | 6.88382900  | 2.51316100  | -1.91871800 | P | -3.55538600 | -0.63306200 | -0.78745100 |
| H                  | 3.06746300  | -0.38184500 | -2.05793700 | H | -5.03009600 | 4.08788400  | -0.08611300 |
| H                  | 5.93437300  | -2.63801100 | -0.81387700 | H | -7.06976100 | 3.48583700  | 1.19414800  |
| H                  | 6.20033000  | -4.92815100 | -1.65397000 | C | 2.87119500  | 0.55999800  | 3.66084900  |
| H                  | 4.56135200  | -5.88658000 | -3.26408200 | C | 1.59901500  | 0.01596700  | 3.46267700  |
| H                  | 2.63203700  | -4.49263300 | -4.01960600 | C | 0.63118100  | 0.66547600  | 2.68152000  |
| H                  | 2.35566500  | -2.20080600 | -3.16000300 | C | 0.97907100  | 1.90587400  | 2.08599700  |
| H                  | 4.05519100  | 4.02751400  | -0.83038300 | C | 2.26074100  | 2.43537300  | 2.28827300  |
| H                  | 5.58688700  | 5.99709300  | -0.80567600 | C | 3.20877300  | 1.77222800  | 3.06756000  |
| H                  | 7.95247600  | 5.72647400  | -1.53395400 | H | 3.59200800  | 0.02617000  | 4.27409000  |
| H                  | 8.76499100  | 3.49388800  | -2.27006700 | H | 1.36577100  | -0.93600000 | 3.92431700  |
| H                  | 7.25640100  | 1.54975900  | -2.24549500 | P | -0.99713900 | -0.18545000 | 2.34097500  |
| <b>(R,S)-TS-II</b> |             |             |             | H | 2.51527900  | 3.38616100  | 1.83308100  |
| C                  | 0.15236700  | 6.58576200  | -1.84730900 | H | 4.19775900  | 2.20116800  | 3.19814400  |
| C                  | -0.84500500 | 6.07253500  | -2.89232500 | H | -0.36670900 | 7.26065700  | -1.15061400 |
| C                  | -1.92385300 | 5.21551400  | -2.22185700 | H | 0.94636900  | 7.17544300  | -2.32192600 |
| C                  | -1.33237600 | 4.02626000  | -1.43489000 | H | -0.31090500 | 5.47622500  | -3.64629000 |
| C                  | -0.27321900 | 4.50374100  | -0.41562700 | H | -1.31115600 | 6.90964500  | -3.42692600 |



|   |             |             |             |    |             |             |             |
|---|-------------|-------------|-------------|----|-------------|-------------|-------------|
| H | -2.63084300 | 4.81914300  | -2.95690900 | H  | -3.03054200 | -3.12457300 | -5.02544900 |
| H | -2.50002000 | 5.83769700  | -1.52127000 | H  | -2.54610700 | -2.57955400 | -2.67225100 |
| H | -0.86243900 | 3.32608300  | -2.13785500 | H  | -5.36007300 | 0.67475400  | -2.84105700 |
| H | -0.80079700 | 5.06408700  | 0.36928600  | H  | -5.87008200 | 0.10675700  | -5.18412400 |
| H | 1.45390100  | 5.78843700  | -0.29380800 | C  | -5.40504700 | -4.56116300 | 0.95726600  |
| H | 1.39469800  | 4.81654200  | -1.75212900 | C  | -6.00684700 | -3.93441800 | -0.13779400 |
| C | -4.08181400 | 1.72444000  | 5.25836200  | C  | -5.46179200 | -2.76376800 | -0.66455900 |
| C | -2.72042300 | 1.98284000  | 5.43394400  | C  | -4.30811200 | -2.19059500 | -0.09849900 |
| C | -1.78254800 | 1.43827300  | 4.55654700  | C  | -3.71141100 | -2.83445400 | 0.99415700  |
| C | -2.19482600 | 0.62522200  | 3.49082500  | C  | -4.25459500 | -4.01001600 | 1.52017900  |
| C | -3.56208500 | 0.37286900  | 3.32106800  | H  | -5.82852700 | -5.47656700 | 1.36215300  |
| C | -4.50015200 | 0.91805500  | 4.19946800  | H  | -6.89960500 | -4.36091100 | -0.58771800 |
| H | -4.81117100 | 2.15358000  | 5.94039400  | H  | -5.93293500 | -2.29617200 | -1.52361300 |
| H | -2.38610300 | 2.61536700  | 6.25220300  | H  | -2.80708600 | -2.42533000 | 1.42855300  |
| H | -0.72877000 | 1.65606200  | 4.69617300  | H  | -3.76875600 | -4.49137500 | 2.36462200  |
| H | -3.90236800 | -0.24668900 | 2.49801600  | Pd | -1.2509360  | -0.49836200 | -0.08100900 |
| H | -5.55708300 | 0.71939300  | 4.04539900  | C  | 5.27212100  | -4.26376700 | 1.35100700  |
| C | -0.39039600 | -4.36735300 | 4.35616600  | C  | 4.59440600  | -5.30554400 | 0.70101800  |
| C | -0.00306100 | -4.14309000 | 3.03318200  | C  | 3.46679700  | -5.05128400 | -0.08153300 |
| C | -0.19944200 | -2.89074900 | 2.44997300  | C  | 3.04897100  | -3.72536600 | -0.17740600 |
| C | -0.76896700 | -1.83367100 | 3.18010900  | C  | 3.72256900  | -2.66198700 | 0.45574200  |
| C | -1.15331100 | -2.07266400 | 4.50962200  | C  | 4.85379000  | -2.93695800 | 1.22559700  |
| C | -0.96807400 | -3.32985200 | 5.08991400  | N  | 1.92811100  | -3.20094800 | -0.84459700 |
| H | -0.24375900 | -5.34338300 | 4.81104700  | C  | 1.82138600  | -1.86648200 | -0.58391600 |
| H | 0.45178900  | -4.94145100 | 2.45284300  | C  | 3.02345800  | -1.41573400 | 0.09255000  |
| H | 0.08702500  | -2.72747800 | 1.41593700  | C  | 1.02032400  | -3.98074400 | -1.67621600 |
| H | -1.59845100 | -1.27682300 | 5.09709800  | C  | 0.66444500  | -1.15236900 | -0.95438000 |
| H | -1.27451300 | -3.49483500 | 6.11961600  | C  | -0.21162700 | -0.78759400 | -1.81532000 |
| C | -4.49140200 | -1.55011700 | -5.26121500 | C  | -0.34062500 | -0.63152800 | -3.27190200 |
| C | -3.55193800 | -2.29949200 | -4.54824400 | O  | -0.00531700 | -1.48783700 | -4.07589700 |
| C | -3.27366500 | -1.98483200 | -3.21808400 | O  | -0.86461200 | 0.55431500  | -3.58964800 |
| C | -3.92614400 | -0.91726400 | -2.58102000 | C  | -1.09832100 | 0.80983400  | -4.98511400 |
| C | -4.86240300 | -0.16756500 | -3.30459600 | H  | 6.14620500  | -4.49183700 | 1.95455000  |
| C | -5.14205000 | -0.48548900 | -4.63597100 | H  | 4.94838300  | -6.32731100 | 0.80649800  |
| H | -4.71221900 | -1.79396200 | -6.29714600 | H  | 2.93848600  | -5.85831000 | -0.57940700 |

H 5.40766400 -2.12596500 1.68146300  
H 2.94153300 -0.60052600 0.79950400  
H 1.57933300 -4.80519100 -2.12304500  
H 0.19311100 -4.38539100 -1.08054100  
H 0.62317800 -3.35167700 -2.47432700  
H -1.62880400 1.76048200 -5.00661400  
H -0.14864100 0.87335000 -5.52435100  
H -1.71273400 0.01511200 -5.41348500  
C 3.94495300 -0.43364200 -1.34025100  
C 4.56758300 0.76289300 -0.77186500  
C 5.70638600 0.78021600 0.11627800  
O 6.17003600 -0.26116100 0.62162200  
C 4.66084000 -1.45157100 -2.17237600  
C 5.97032100 -1.90350500 -1.93188400  
C 6.56713500 -2.82321700 -2.79323700  
C 5.87531200 -3.31931500 -3.90101600  
C 4.57263100 -2.88415300 -4.14750500  
C 3.97365000 -1.96019800 -3.29105100  
C 3.77461500 1.91940100 -0.91713900  
N 3.05411200 2.83400000 -1.06079600  
C 6.35925400 2.08795700 0.49237000  
C 6.99153400 2.15922800 1.74439900  
C 7.64388200 3.32189200 2.14845800  
C 7.69736100 4.42650100 1.29289500  
C 7.09756600 4.35638200 0.03436800  
C 6.43064700 3.19632200 -0.36392100  
H 3.04821300 -0.12691300 -1.87498000  
H 6.50553900 -1.53564200 -1.06588000  
H 7.58210100 -3.15739300 -2.59345000  
H 6.34842100 -4.03710900 -4.56640700  
H 4.02318200 -3.25306800 -5.00981300  
H 2.96216100 -1.61967500 -3.50383100  
H 6.96883600 1.28011600 2.38060100  
H 8.11972900 3.36569200 3.12500100  
H 8.21178600 5.33270900 1.60255300

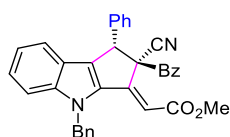

H 7.15203900 5.20433900 -0.64335100  
H 5.98070200 3.15060600 -1.34975000  
C 0.98009800 -1.34559800 -0.37631100  
C 1.10109300 0.25009600 -0.07000600  
C -2.46900200 -4.58068200 -1.61851800  
C -3.68397900 -3.90072600 -1.84893600  
C -3.78875500 -2.52267400 -1.69559000  
C -2.64005000 -1.82041800 -1.30906600  
C -1.40165100 -2.49574200 -1.06667200  
C -1.33072700 -3.89221600 -1.22677500  
N -2.46390700 -0.45619100 -1.09437700  
C -1.14326500 -0.27358000 -0.70980900  
C -0.47848000 -1.47796200 -0.69046900  
C -0.30824700 0.84651500 -0.37205800  
C -0.64907000 2.15368200 -0.28555000  
C 1.51024900 -2.30151600 0.67974900  
C 2.72786000 -2.96317600 0.47059800  
C 3.22376100 -3.86539200 1.41398100  
C 2.50329900 -4.11989300 2.58146000  
C 1.28621100 -3.46908000 2.79812300  
C 0.79281600 -2.56959500 1.85438100  
C -4.15831500 1.10559600 -0.08468600  
C -4.31606900 0.32102500 1.06292300  
C -4.99374600 0.82486300 2.17455100  
C -5.52371800 2.11623000 2.15084100  
C -5.36976400 2.90470000 1.00895700  
C -4.68850200 2.40189100 -0.10024600  
C -3.46834600 0.57083200 -1.33164300  
C 0.29536800 3.22976900 0.02721400  
O 1.50259800 3.11812900 0.17649400  
O -0.34782800 4.41859500 0.12500200  
C 0.48997000 5.54164100 0.43127200

|   |             |             |             |
|---|-------------|-------------|-------------|
| C | 1.38735000  | 0.50598300  | 1.34463900  |
| N | 1.54916800  | 0.67773600  | 2.48174800  |
| C | 2.14097500  | 0.82077400  | -1.09640700 |
| C | 6.37507100  | 1.16342000  | -0.45089400 |
| C | 5.75174900  | 1.76419200  | -1.54964500 |
| C | 4.37829400  | 1.63831300  | -1.72321800 |
| C | 3.60060600  | 0.92472800  | -0.79322800 |
| C | 4.23360800  | 0.32469000  | 0.30577500  |
| C | 5.61515500  | 0.44108800  | 0.46908200  |
| O | 1.71452700  | 1.07263800  | -2.20939900 |
| H | 1.56091700  | -1.52317900 | -1.29048100 |
| H | -2.43071800 | -5.65868900 | -1.74589900 |
| H | -4.56177700 | -4.46684500 | -2.14784800 |
| H | -4.73640300 | -2.01985700 | -1.86312700 |
| H | -0.39820600 | -4.41606900 | -1.03924300 |
| H | -1.67525400 | 2.46195800  | -0.44173800 |
| H | 3.29170500  | -2.77089400 | -0.43940100 |
| H | 4.16895800  | -4.37015200 | 1.23275300  |
| H | 2.88521300  | -4.82260500 | 3.31713400  |
| H | 0.71892000  | -3.66185100 | 3.70455700  |
| H | -0.15601600 | -2.07103200 | 2.02867100  |
| H | -3.90267500 | -0.68300700 | 1.09007700  |
| H | -5.10440100 | 0.20701900  | 3.06159700  |
| H | -6.04753900 | 2.50787300  | 3.01842400  |
| H | -5.77084000 | 3.91428400  | 0.98362200  |
| H | -4.56562500 | 3.02404600  | -0.98475600 |
| H | -4.20831400 | 0.13646500  | -2.01300300 |
| H | -2.99994100 | 1.39231700  | -1.88390700 |
| H | -0.17911900 | 6.40178600  | 0.47660200  |
| H | 0.99422300  | 5.39535200  | 1.39040700  |
| H | 1.24556300  | 5.68282700  | -0.34673600 |
| H | 7.44909900  | 1.25915000  | -0.31413500 |
| H | 6.33913600  | 2.32781800  | -2.26943700 |
| H | 3.87856100  | 2.08773100  | -2.57427200 |
| H | 3.66877500  | -0.23957100 | 1.03645400  |

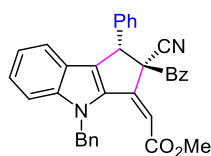

|   |             |             |             |
|---|-------------|-------------|-------------|
| H | 6.09348200  | -0.03124800 | 1.32241400  |
| C | -1.08009700 | 1.03256800  | -0.96937000 |
| C | -1.32178600 | -0.33977000 | -0.16288800 |
| C | 2.78115500  | 3.80749100  | -2.09534900 |
| C | 3.96046400  | 3.04573300  | -1.93577200 |
| C | 3.92094500  | 1.71673300  | -1.53458600 |
| C | 2.66329600  | 1.14328300  | -1.30222100 |
| C | 1.46312100  | 1.90622600  | -1.43933600 |
| C | 1.53591500  | 3.25301100  | -1.84833200 |
| N | 2.35155800  | -0.15435000 | -0.91583300 |
| C | 0.96810500  | -0.21945300 | -0.79651000 |
| C | 0.41433800  | 1.01911600  | -1.07734400 |
| C | -0.05378300 | -1.20320900 | -0.49291900 |
| C | -0.14307700 | -2.55547700 | -0.44667600 |
| C | -1.72736400 | 2.27430100  | -0.38790500 |
| C | -2.94355100 | 2.72960700  | -0.91757700 |
| C | -3.56836200 | 3.86598900  | -0.40175600 |
| C | -2.98090800 | 4.56676200  | 0.65308400  |
| C | -1.76756500 | 4.12513800  | 1.18559900  |
| C | -1.14428100 | 2.98851900  | 0.66940000  |
| C | 3.92090800  | -0.65020100 | 0.97484400  |
| C | 5.30454900  | -0.66818800 | 1.18517600  |
| C | 5.84435100  | -0.33607300 | 2.42986900  |
| C | 5.00168500  | 0.02540200  | 3.48123900  |
| C | 3.61890700  | 0.04821000  | 3.28078500  |
| C | 3.08200000  | -0.29005700 | 2.03873900  |
| C | 3.35558300  | -1.07239300 | -0.37233000 |
| C | 0.81469900  | -3.54945100 | -0.94051200 |
| O | 1.86112700  | -3.35095200 | -1.53783600 |
| O | 0.34926300  | -4.79876200 | -0.68528500 |
| C | 1.16898000  | -5.86935100 | -1.17085000 |
| C | -1.25235400 | -0.12927200 | 1.28894600  |

|   |             |             |             |
|---|-------------|-------------|-------------|
| N | -1.11878400 | 0.00453000  | 2.43577500  |
| C | -2.64289900 | -0.99157100 | -0.69102600 |
| C | -6.35926900 | -1.28378600 | 1.43791300  |
| C | -5.46908200 | -0.26580100 | 1.78215200  |
| C | -4.24032000 | -0.15390100 | 1.13088200  |
| C | -3.89965700 | -1.05864300 | 0.11183400  |
| C | -4.81718000 | -2.06429200 | -0.24766100 |
| C | -6.03062700 | -2.18503100 | 0.41993600  |
| O | -2.60840200 | -1.43797900 | -1.82481700 |
| H | -1.52525500 | 0.85014700  | -1.95554400 |
| H | 2.85706500  | 4.84373400  | -2.41235900 |
| H | 4.92287200  | 3.51122100  | -2.12969300 |
| H | 4.83543700  | 1.14818300  | -1.40515500 |
| H | 0.63035900  | 3.84106000  | -1.96149500 |
| H | -1.08156000 | -2.99022300 | -0.12234300 |
| H | -3.40148600 | 2.19119800  | -1.74448100 |
| H | -4.50908500 | 4.20460600  | -0.82745000 |
| H | -3.46272300 | 5.45414100  | 1.05474100  |
| H | -1.30188400 | 4.66684400  | 2.00430400  |
| H | -0.19889900 | 2.65573400  | 1.08597300  |
| H | 5.96694000  | -0.94770900 | 0.36811800  |
| H | 6.92157900  | -0.35436500 | 2.57361400  |
| H | 5.41778700  | 0.28861700  | 4.45003600  |
| H | 2.95374900  | 0.32602900  | 4.09397000  |
| H | 2.00394300  | -0.26990600 | 1.90184800  |
| H | 4.16302300  | -1.15981300 | -1.10729600 |
| H | 2.89534000  | -2.05603100 | -0.32162700 |
| H | 0.65216200  | -6.78606700 | -0.88469200 |
| H | 1.27577100  | -5.81176400 | -2.25773900 |
| H | 2.16324300  | -5.83198600 | -0.71650300 |
| H | -7.30913900 | -1.37389800 | 1.95814000  |
| H | -5.72680600 | 0.44469800  | 2.56210300  |
| H | -3.57104600 | 0.65063100  | 1.40773900  |
| H | -4.55447500 | -2.74191300 | -1.05313000 |
| H | -6.72326000 | -2.97588900 | 0.14597700  |

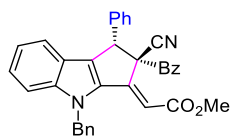

|   |             |             |             |
|---|-------------|-------------|-------------|
| C | -1.80764400 | 0.96379500  | -1.09106200 |
| C | -1.25487100 | -0.55611700 | -1.34466000 |
| C | 0.01795300  | 5.45079300  | -0.43765300 |
| C | 1.42783300  | 5.38668300  | -0.44636400 |
| C | 2.10208400  | 4.18102500  | -0.60341800 |
| C | 1.33385500  | 3.01982800  | -0.76141800 |
| C | -0.09601300 | 3.06713800  | -0.74842300 |
| C | -0.74767100 | 4.30417100  | -0.58422900 |
| N | 1.74323300  | 1.70209900  | -0.94597100 |
| C | 0.59350100  | 0.92786200  | -1.03595600 |
| C | -0.52775000 | 1.72031100  | -0.92577700 |
| C | 0.29566200  | -0.46716200 | -1.24881400 |
| C | 1.17304300  | -1.48948700 | -1.39446400 |
| C | -2.85039600 | 1.15041800  | 0.00557700  |
| C | -4.20195300 | 0.91795100  | -0.29055900 |
| C | -5.18642300 | 1.10122000  | 0.67886200  |
| C | -4.83616300 | 1.52872300  | 1.96189300  |
| C | -3.49601500 | 1.76835900  | 2.26612400  |
| C | -2.51063500 | 1.57972300  | 1.29470300  |
| C | 3.67389600  | 0.62233800  | 0.24164400  |
| C | 3.26893100  | 1.06131200  | 1.50820200  |
| C | 3.81735200  | 0.49544600  | 2.66045300  |
| C | 4.77778700  | -0.51388100 | 2.56092400  |
| C | 5.18663800  | -0.95555100 | 1.30167700  |
| C | 4.63543400  | -0.39105100 | 0.14995900  |
| C | 3.12703600  | 1.25575000  | -1.03004800 |
| C | 0.78934800  | -2.88478900 | -1.63043600 |

|   |             |             |             |   |             |             |             |             |
|---|-------------|-------------|-------------|---|-------------|-------------|-------------|-------------|
| O | -0.34649000 | -3.32939600 | -1.65583700 | H | 3.22030400  | 0.55927200  | -1.86943600 |             |
| O | 1.88715900  | -3.65622300 | -1.82154000 | H | 2.59570300  | -5.51007500 | -2.20728600 |             |
| C | 1.61940700  | -5.04432400 | -2.06804100 | H | 1.09715200  | -5.49228300 | -1.21806500 |             |
| C | -1.59157500 | -0.89737700 | -2.73667800 | H | 1.00380000  | -5.16393400 | -2.96366800 |             |
| N | -1.82633900 | -1.06640200 | -3.86068800 | H | -0.34055700 | -3.24343200 | 4.42677500  |             |
| C | -2.00255900 | -1.58433800 | -0.42158400 | H | -2.10258200 | -4.47514700 | 3.17188700  |             |
| C | -0.66050500 | -2.89221800 | 3.44915100  | H | -2.82703500 | -3.65383400 | 0.93282600  |             |
| C | -1.65008600 | -3.58462500 | 2.74411600  | H | -0.03312000 | -0.40482500 | 1.23053300  |             |
| C | -2.05783400 | -3.13389200 | 1.49307600  | H | 0.68235600  | -1.20283700 | 3.43622300  |             |
| C | -1.47544800 | -1.99036500 | 0.91905800  |   |             |             |             |             |
| C | -0.48749500 | -1.30016800 | 1.63563900  |   |             |             |             |             |
| C | -0.08596800 | -1.74791100 | 2.89488700  |   |             |             |             |             |
| O | -3.07286100 | -1.99959700 | -0.82029100 |   | C           | -2.13010100 | 0.29452100  | 0.39860200  |
| H | -2.29277600 | 1.25846000  | -2.02849400 |   | C           | -0.85198800 | -4.31122300 | -0.48584400 |
| H | -0.46972500 | 6.41286700  | -0.31040100 | C | 0.55266400  | -4.45617000 | -0.44945000 |             |
| H | 2.00243300  | 6.30044900  | -0.32335500 | C | 1.37519000  | -3.38556800 | -0.14005300 |             |
| H | 3.18743100  | 4.15256600  | -0.59603400 | C | 0.76496600  | -2.15193800 | 0.13547000  |             |
| H | -1.83234300 | 4.35129600  | -0.56781300 | C | -0.65116300 | -1.97168600 | 0.07577400  |             |
| H | 2.23746900  | -1.30772800 | -1.31959900 | C | -1.45675400 | -3.09313400 | -0.22789900 |             |
| H | -4.47956900 | 0.57652200  | -1.28407300 | N | 1.35511200  | -0.96370900 | 0.49982900  |             |
| H | -6.22724200 | 0.91194700  | 0.43091800  | C | 0.34595400  | -0.02816400 | 0.68415200  |             |
| H | -5.60334300 | 1.67640700  | 2.71727700  | C | -0.89328700 | -0.59596700 | 0.39602900  |             |
| H | -3.21318800 | 2.10495800  | 3.26003400  | C | -1.90514900 | 1.31442900  | -0.74781700 |             |
| H | -1.47207000 | 1.78114200  | 1.53874200  | C | -0.91215000 | 2.21813700  | -0.60106100 |             |
| H | 2.52385000  | 1.84742300  | 1.59351000  | O | -0.16929100 | 2.34589300  | 0.53316400  |             |
| H | 3.49616900  | 0.84715400  | 3.63741600  | C | 0.53460300  | 1.32563000  | 1.17783100  |             |
| H | 5.20215700  | -0.95473400 | 3.45869300  | C | 1.25432400  | 1.78520400  | 2.23216800  |             |
| H | 5.92785200  | -1.74507500 | 1.21341200  | C | -3.49719000 | -0.37490200 | 0.44003100  |             |
| H | 4.95453700  | -0.74459500 | -0.82851200 | C | -4.04477200 | -1.09538200 | -0.63183400 |             |
| H | 3.72508400  | 2.13233600  | -1.30171500 | C | -5.30733700 | -1.68071900 | -0.52431900 |             |

|   |             |             |             |   |             |             |             |
|---|-------------|-------------|-------------|---|-------------|-------------|-------------|
| C | -6.04347900 | -1.56227900 | 0.65588700  | H | -3.84384400 | 0.29611900  | 2.45898700  |
| C | -5.50925900 | -0.85035700 | 1.72996900  | H | 4.91308800  | -2.25214900 | -0.26611400 |
| C | -4.24981100 | -0.26042300 | 1.61727500  | H | 6.03426500  | -2.31892500 | -2.47351100 |
| C | 3.44734500  | -0.78900300 | -0.85895200 | H | 5.20737100  | -0.88745300 | -4.33362000 |
| C | 4.54724800  | -1.62546200 | -1.07708800 | H | 3.25969600  | 0.61443300  | -3.95943900 |
| C | 5.18230400  | -1.66173400 | -2.32093000 | H | 2.15033000  | 0.68882600  | -1.75795700 |
| C | 4.71872600  | -0.85959000 | -3.36350300 | H | 3.25992000  | -1.44412500 | 1.19723300  |
| C | 3.62292500  | -0.01763800 | -3.15361200 | H | 2.95198700  | 0.26235500  | 0.95027800  |
| C | 2.99379600  | 0.02018100  | -1.90992800 | H | 3.36734900  | 1.86472300  | 6.00551000  |
| C | 2.79789000  | -0.72487100 | 0.51439000  | H | 2.27587900  | 0.44774200  | 5.85329200  |
| C | -2.68484200 | 1.26117500  | -1.94179000 | H | 3.83363500  | 0.45534000  | 4.99620000  |
| N | -3.35213600 | 1.17002200  | -2.89081200 |   |             |             |             |
| C | -0.45353700 | 3.27035100  | -1.59015500 |   |             |             |             |
| F | -1.19912800 | 3.32230500  | -2.69826200 |   |             |             |             |
| F | 0.82389200  | 3.00520100  | -1.95695300 |   |             |             |             |
| F | -0.46187100 | 4.48756800  | -1.01837000 |   |             |             |             |
| C | 1.87401500  | 0.96003900  | 3.27416300  |   |             |             |             |
| O | 1.92539700  | -0.25659100 | 3.33148900  |   |             |             |             |
| O | 2.39493500  | 1.76517900  | 4.23741400  |   |             |             |             |
| C | 3.00472300  | 1.08093200  | 5.33955500  |   |             |             |             |
| H | -2.07527700 | 0.90132200  | 1.31100600  |   |             |             |             |
| H | -1.46937900 | -5.17476400 | -0.71673700 |   |             |             |             |
| H | 0.99561800  | -5.42571900 | -0.65944900 |   |             |             |             |
| H | 2.45297700  | -3.49828600 | -0.11000700 |   |             |             |             |
| H | -2.53548400 | -3.01013100 | -0.24435700 |   |             |             |             |
| H | 1.27668200  | 2.85808200  | 2.38696000  |   |             |             |             |
| H | -3.49255800 | -1.20422000 | -1.55815300 |   |             |             |             |
| H | -5.71496700 | -2.22823900 | -1.36954400 |   |             |             |             |
| H | -7.02635200 | -2.01855900 | 0.73540900  |   |             |             |             |
| H | -6.07126100 | -0.74841100 | 2.65426000  |   |             |             |             |
|   |             |             |             | C | -1.92399100 | -0.78912100 | -0.30532200 |
|   |             |             |             | C | -2.45536400 | 3.97593300  | -1.01876100 |
|   |             |             |             | C | -1.21401300 | 4.59206100  | -1.28488400 |
|   |             |             |             | C | -0.04763700 | 3.84670100  | -1.35804500 |
|   |             |             |             | C | -0.14386400 | 2.46176200  | -1.16016200 |
|   |             |             |             | C | -1.37988200 | 1.82030000  | -0.84952800 |
|   |             |             |             | C | -2.55057100 | 2.61109700  | -0.80325600 |
|   |             |             |             | N | 0.85492600  | 1.51046700  | -1.23259700 |
|   |             |             |             | C | 0.27588800  | 0.27033600  | -0.95756200 |
|   |             |             |             | C | -1.08179200 | 0.42433000  | -0.68918800 |
|   |             |             |             | C | -1.28740200 | -1.37704900 | 0.98129800  |
|   |             |             |             | C | -0.05995000 | -1.92336400 | 0.87037600  |
|   |             |             |             | O | 0.57672100  | -2.05411000 | -0.32755300 |
|   |             |             |             | C | 0.96830400  | -0.99886900 | -1.13143800 |
|   |             |             |             | C | 1.88737200  | -1.24807300 | -2.09763600 |
|   |             |             |             | C | -3.43597800 | -0.61830800 | -0.25833300 |

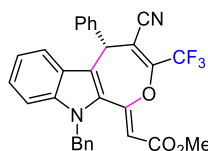

|   |             |             |             |                  |             |             |             |
|---|-------------|-------------|-------------|------------------|-------------|-------------|-------------|
| C | -4.09433700 | 0.16292300  | 0.70306700  | H                | -7.32690800 | -0.31373700 | -0.26151500 |
| C | -5.48578900 | 0.26941400  | 0.70095000  | H                | -6.17809700 | -1.70170900 | -1.98159200 |
| C | -6.24364500 | -0.39773100 | -0.26356500 | H                | -3.71704700 | -1.89967500 | -1.96865800 |
| C | -5.60057400 | -1.17589900 | -1.22630600 | H                | 3.42709600  | 4.28907200  | -0.77424900 |
| C | -4.20936100 | -1.28595000 | -1.21766400 | H                | 4.22102600  | 5.27492000  | 1.35260300  |
| C | 2.74226200  | 2.45542400  | 0.12749800  | H                | 3.99464600  | 3.99973800  | 3.47740000  |
| C | 3.32190100  | 3.72836800  | 0.15235800  | H                | 2.98003500  | 1.72852300  | 3.44885000  |
| C | 3.77402300  | 4.28446400  | 1.35129900  | H                | 2.19987000  | 0.74089100  | 1.32990800  |
| C | 3.64708100  | 3.56961000  | 2.54211900  | H                | 2.49717100  | 2.53282400  | -2.01520200 |
| C | 3.07441700  | 2.29476900  | 2.52631300  | H                | 2.84090600  | 0.92902700  | -1.38604200 |
| C | 2.62869000  | 1.73948000  | 1.32759100  | H                | 3.18288900  | -5.23962200 | -0.78568300 |
| C | 2.28559300  | 1.84625700  | -1.18863200 | H                | 3.11544100  | -5.06594300 | -2.57227600 |
| C | -1.95995200 | -1.30518300 | 2.23793500  | H                | 4.44977500  | -4.31888900 | -1.66466300 |
| N | -2.55038000 | -1.21771500 | 3.23676600  | <b>(R,S)-TS2</b> |             |             |             |
| C | 0.80740200  | -2.52568800 | 1.95581800  | C                | -4.43250400 | -5.63234000 | 1.97463800  |
| F | 0.22004300  | -2.53768000 | 3.15806000  | C                | -3.86499900 | -4.95313400 | 3.22777200  |
| F | 1.94991800  | -1.80362700 | 2.05611600  | C                | -4.11806200 | -3.44103500 | 3.18663700  |
| F | 1.15233500  | -3.78502200 | 1.64114600  | C                | -3.54144000 | -2.79098300 | 1.91254600  |
| C | 2.69615200  | -2.45297500 | -2.34797700 | C                | -4.08969400 | -3.47504900 | 0.64368000  |
| O | 3.42187800  | -2.55259500 | -3.32264000 | C                | -3.86460500 | -4.99732600 | 0.69824300  |
| O | 2.58351300  | -3.41595700 | -1.40691800 | N                | -3.84843500 | -1.35980400 | 1.88437900  |
| C | 3.38875100  | -4.58168100 | -1.63057800 | N                | -3.49469100 | -2.96673600 | -0.59339700 |
| H | -1.73399700 | -1.55547000 | -1.06788200 | C                | -3.07351300 | -0.46975200 | 2.55217400  |
| H | -3.35451300 | 4.58455500  | -0.98455400 | O                | -2.09346000 | -0.80526800 | 3.22718100  |
| H | -1.17201500 | 5.66590800  | -1.44375900 | C                | -3.92711800 | -1.85903600 | -1.23917000 |
| H | 0.90422300  | 4.32152500  | -1.56798200 | O                | -4.77939000 | -1.08277600 | -0.78401200 |
| H | -3.51527900 | 2.16049500  | -0.61249900 | H                | -4.44242800 | -1.02755000 | 1.12253300  |
| H | 2.05514600  | -0.47353600 | -2.83511800 | H                | -2.63909300 | -3.40847800 | -0.93488300 |
| H | -3.52604100 | 0.69560700  | 1.45756800  | C                | -4.51936100 | 3.57519400  | 2.77527800  |
| H | -5.97612500 | 0.87444600  | 1.45842300  | C                | -3.18153500 | 3.34884700  | 2.44298400  |

|   |             |             |             |   |             |            |             |
|---|-------------|-------------|-------------|---|-------------|------------|-------------|
| C | -2.66011100 | 2.05299800  | 2.32120200  | C | -5.86105200 | 3.68579000 | -1.68852800 |
| C | -3.54178800 | 0.96318100  | 2.52902900  | C | -5.97984500 | 2.47169900 | -2.36527900 |
| C | -4.88556600 | 1.20162100  | 2.84446200  | C | -4.89559300 | 1.59488000 | -2.43821800 |
| C | -5.37895300 | 2.49955200  | 2.97270100  | C | -3.67552800 | 1.92174500 | -1.82997100 |
| H | -4.88236700 | 4.59508800  | 2.87035700  | C | -3.56793800 | 3.14204100 | -1.14361200 |
| H | -2.54087400 | 4.20395800  | 2.26473600  | C | -4.65017800 | 4.01895600 | -1.07815500 |
| P | -0.91840500 | 1.77914800  | 1.70852400  | H | -6.70589900 | 4.36748700 | -1.63569700 |
| H | -5.54142000 | 0.35252500  | 3.01101500  | H | -6.91892800 | 2.20050700 | -2.84036800 |
| H | -6.42285600 | 2.66261800  | 3.22541900  | H | -5.00933700 | 0.65251900 | -2.95956800 |
| C | -2.67713600 | -1.48320300 | -5.33902400 | H | -2.63216200 | 3.42017200 | -0.66935900 |
| C | -2.36052100 | -0.46009800 | -4.44347500 | H | -4.54559700 | 4.96090200 | -0.54669500 |
| C | -2.71096400 | -0.53101600 | -3.08529000 | C | 0.75225600  | 3.30847400 | -4.57927600 |
| C | -3.38817700 | -1.68865300 | -2.63901000 | C | 1.22540000  | 2.29429700 | -3.74402400 |
| C | -3.68418700 | -2.71965700 | -3.54172400 | C | 0.33369300  | 1.56179500 | -2.95829500 |
| C | -3.34162900 | -2.62153400 | -4.88912400 | C | -1.04493500 | 1.83308000 | -2.99475200 |
| H | -2.39888000 | -1.38428600 | -6.38481800 | C | -1.50947700 | 2.85511300 | -3.83926800 |
| H | -1.82869400 | 0.40756400  | -4.81435500 | C | -0.61610500 | 3.58562100 | -4.62567100 |
| P | -2.18166700 | 0.83163200  | -1.91914300 | H | 1.44654400  | 3.88371500 | -5.18596700 |
| H | -4.20058900 | -3.60206700 | -3.17593700 | H | 2.28870700  | 2.08070200 | -3.68498400 |
| H | -3.59161300 | -3.42623900 | -5.57497900 | H | 0.71605200  | 0.79217300 | -2.29455800 |
| H | -5.52815000 | -5.53829900 | 1.97412900  | H | -2.56929200 | 3.08457200 | -3.88233700 |
| H | -4.21073200 | -6.70644400 | 1.98073000  | H | -0.99183000 | 4.37467800 | -5.27195500 |
| H | -2.78359400 | -5.14427000 | 3.28890600  | C | 1.82024000  | 1.17133900 | 5.42666300  |
| H | -4.30992500 | -5.38409900 | 4.13292100  | C | 2.35516600  | 1.30568400 | 4.14231800  |
| H | -3.67610600 | -2.94423000 | 4.05661900  | C | 1.51023300  | 1.47163800 | 3.04431200  |
| H | -5.19962700 | -3.24545900 | 3.21866300  | C | 0.11569400  | 1.50087100 | 3.21975800  |
| H | -2.45016000 | -2.90337800 | 1.92209400  | C | -0.41398100 | 1.37042500 | 4.50913800  |
| H | -5.16686700 | -3.26903900 | 0.58324300  | C | 0.43631000  | 1.20757200 | 5.60618300  |
| H | -4.31165000 | -5.45153400 | -0.19410400 | H | 2.47957200  | 1.04452100 | 6.28140200  |
| H | -2.78365200 | -5.19349100 | 0.64349100  | H | 3.43059900  | 1.28112000 | 3.99108300  |



|    |             |             |             |   |             |             |             |
|----|-------------|-------------|-------------|---|-------------|-------------|-------------|
| H  | 1.94425700  | 1.59468700  | 2.05434300  | C | 0.59944100  | -3.36727800 | -3.86700400 |
| H  | -1.48691600 | 1.37965300  | 4.65916700  | H | 6.95515900  | -1.95594200 | 3.54189200  |
| H  | 0.01187300  | 1.10975400  | 6.60226400  | H | 5.40971600  | -2.67582200 | 5.33602000  |
| C  | 0.72352400  | 6.00722700  | 0.60039300  | H | 2.95034000  | -2.72020700 | 4.94671900  |
| C  | 0.41975200  | 5.70864900  | 1.93258000  | H | 6.09598400  | -1.24196600 | 1.32782400  |
| C  | -0.07874800 | 4.45260600  | 2.27314900  | H | 3.11628900  | 0.01839700  | 0.64794300  |
| C  | -0.30263800 | 3.47730800  | 1.28277300  | H | 0.66102000  | -3.37553500 | 3.43410700  |
| C  | 0.02402900  | 3.78344400  | -0.04371500 | H | 0.77778700  | -1.77339400 | 4.21845300  |
| C  | 0.53202800  | 5.04061500  | -0.38480800 | H | -0.22105000 | -1.96005400 | 2.77618000  |
| H  | 1.12302500  | 6.98343700  | 0.33870600  | H | 1.24058000  | -2.95394600 | -4.64471200 |
| H  | 0.58427400  | 6.45089500  | 2.70932600  | H | 0.99246000  | -4.32607100 | -3.52213300 |
| H  | -0.28135300 | 4.22403900  | 3.31549100  | H | -0.42398600 | -3.48790300 | -4.22822300 |
| H  | -0.09019400 | 3.02968100  | -0.81271100 | C | 3.62340600  | -1.33644300 | -0.76076300 |
| H  | 0.78950800  | 5.24861500  | -1.41936900 | C | 4.76248900  | -0.34416600 | -1.02819800 |
| Pd | -0.83402300 | 0.11417000  | -0.04346800 | C | 4.50151600  | 0.98869900  | -0.68869800 |
| C  | 5.88493900  | -1.95757400 | 3.35591400  | O | 3.38447900  | 1.28717200  | -0.09695000 |
| C  | 5.00960000  | -2.36961300 | 4.37362300  | C | 3.85636500  | -2.75840500 | -1.25796700 |
| C  | 3.63102300  | -2.39844600 | 4.16518200  | C | 3.77478200  | -3.88876000 | -0.43782900 |
| C  | 3.17281600  | -1.99997700 | 2.90980800  | C | 3.93650900  | -5.17459600 | -0.96406700 |
| C  | 4.03019600  | -1.57254200 | 1.87819900  | C | 4.18961200  | -5.35258000 | -2.32275200 |
| C  | 5.40934100  | -1.55232600 | 2.10762600  | C | 4.27855000  | -4.23163600 | -3.15367900 |
| N  | 1.84903800  | -1.95987900 | 2.43680100  | C | 4.11036200  | -2.95334500 | -2.62623900 |
| C  | 1.82894500  | -1.55508800 | 1.15123500  | C | 6.03185300  | -0.81434300 | -1.43006900 |
| C  | 3.18086600  | -1.18702000 | 0.72525700  | N | 7.07612800  | -1.23295100 | -1.75404300 |
| C  | 0.69454500  | -2.29384000 | 3.26126000  | C | 5.44769900  | 2.12483400  | -0.92034600 |
| C  | 0.65583100  | -1.36485200 | 0.37524300  | C | 5.36207800  | 3.23914100  | -0.06838600 |
| C  | 0.00492700  | -1.66294200 | -0.69037600 | C | 6.19816300  | 4.33912800  | -0.24547600 |
| C  | -0.11983400 | -2.68140000 | -1.72711100 | C | 7.12522100  | 4.35463300  | -1.29102500 |
| O  | -0.84535600 | -3.66612900 | -1.65425000 | C | 7.20452900  | 3.26203100  | -2.15663400 |
| O  | 0.63940400  | -2.40267100 | -2.79618200 | C | 6.37278600  | 2.15637000  | -1.97628900 |

|          |             |             |             |   |             |             |             |
|----------|-------------|-------------|-------------|---|-------------|-------------|-------------|
| H        | 2.75654600  | -0.95572700 | -1.31924100 | C | 1.07184100  | -0.86565400 | 4.43430400  |
| H        | 3.59482500  | -3.77633100 | 0.62610800  | C | 1.59960500  | -2.07847900 | 4.87756300  |
| H        | 3.87105300  | -6.03525600 | -0.30315400 | H | 1.74664900  | -4.19223900 | 4.47960900  |
| H        | 4.32413300  | -6.35097900 | -2.73082000 | H | 0.42834100  | -4.08636200 | 2.41329400  |
| H        | 4.48632100  | -4.35323100 | -4.21390700 | P | -0.83511900 | -1.86487600 | 0.87379100  |
| H        | 4.18368800  | -2.08793000 | -3.27912900 | H | 1.24433200  | 0.04327700  | 5.00298200  |
| H        | 4.62638300  | 3.22347600  | 0.72834600  | H | 2.19661600  | -2.11319100 | 5.78462300  |
| H        | 6.12501600  | 5.18739100  | 0.43094400  | C | 4.69376600  | 2.47201200  | -2.91921300 |
| H        | 7.77707900  | 5.21319900  | -1.43259100 | C | 4.07091600  | 1.30257900  | -2.47923700 |
| H        | 7.91485100  | 3.26860100  | -2.97945400 | C | 3.32346800  | 1.26535800  | -1.29056500 |
| H        | 6.44465600  | 1.31928800  | -2.66080500 | C | 3.21327300  | 2.45918600  | -0.54441700 |
| <b>I</b> |             |             |             | C | 3.82541000  | 3.63355400  | -1.00301200 |
| C        | -0.22425400 | 5.87159200  | 3.25051400  | C | 4.56926600  | 3.64708100  | -2.18126100 |
| C        | -1.32052100 | 4.93448900  | 3.77377900  | H | 5.27279800  | 2.45734700  | -3.83887300 |
| C        | -0.76687800 | 3.52147700  | 3.99478600  | H | 4.17075200  | 0.40476900  | -3.07732200 |
| C        | -0.12914400 | 2.94342700  | 2.71522100  | P | 2.42032200  | -0.29603900 | -0.79538900 |
| C        | 0.96683600  | 3.88212600  | 2.17089600  | H | 3.71844100  | 4.54173600  | -0.41740100 |
| C        | 0.42096100  | 5.30879200  | 1.97684800  | H | 5.04473500  | 4.56523300  | -2.51526100 |
| N        | 0.42863200  | 1.61457400  | 2.97404800  | H | 0.54616100  | 5.99885300  | 4.02500200  |
| N        | 1.54525700  | 3.43523200  | 0.90247800  | H | -0.63078000 | 6.86982800  | 3.04660300  |
| C        | -0.37014400 | 0.51864400  | 2.95155000  | H | -2.14594300 | 4.89650800  | 3.04806500  |
| O        | -1.59052800 | 0.57854600  | 2.76947600  | H | -1.74375700 | 5.32324900  | 4.70813800  |
| C        | 2.55222100  | 2.53771300  | 0.81017700  | H | -1.55568900 | 2.83744400  | 4.32375500  |
| O        | 2.99424200  | 1.88921600  | 1.77010900  | H | -0.00419900 | 3.54130100  | 4.78681300  |
| H        | 1.43602200  | 1.50102800  | 2.84747800  | H | -0.90885700 | 2.83874600  | 1.95047000  |
| H        | 1.10478300  | 3.73396600  | 0.02883200  | H | 1.78840000  | 3.90416500  | 2.89973400  |
| C        | 1.34828100  | -3.23665300 | 4.14875400  | H | 1.23864900  | 5.95553300  | 1.63658500  |
| C        | 0.58711400  | -3.17526000 | 2.97842100  | H | -0.32429100 | 5.29138000  | 1.16802000  |
| C        | 0.04079800  | -1.96909400 | 2.51888000  | C | 5.40271100  | -2.49259200 | 2.04232400  |
| C        | 0.29112200  | -0.79723700 | 3.27434000  | C | 5.70405500  | -1.20487500 | 1.59809700  |

|   |             |             |             |    |             |             |             |
|---|-------------|-------------|-------------|----|-------------|-------------|-------------|
| C | 4.82505700  | -0.52603600 | 0.75200100  | H  | -4.84174700 | -2.37936500 | 3.85640800  |
| C | 3.62617500  | -1.12599500 | 0.34119300  | C  | -0.31395200 | -6.09805800 | -1.04491200 |
| C | 3.32572600  | -2.41716700 | 0.80456300  | C  | -1.12974800 | -5.94565200 | 0.08032900  |
| C | 4.20984400  | -3.09759000 | 1.64155400  | C  | -1.29051200 | -4.69050800 | 0.66625000  |
| H | 6.09010800  | -3.02003800 | 2.69860800  | C  | -0.62575400 | -3.56471100 | 0.14606500  |
| H | 6.62667500  | -0.72169600 | 1.90899300  | C  | 0.17430900  | -3.72953000 | -0.99240900 |
| H | 5.07144900  | 0.47653600  | 0.42438900  | C  | 0.33351100  | -4.98677900 | -1.58302300 |
| H | 2.40323600  | -2.90274900 | 0.50192300  | H  | -0.19586700 | -7.07625100 | -1.50384400 |
| H | 3.96092100  | -4.09806500 | 1.98481100  | H  | -1.65015700 | -6.80425100 | 0.49690400  |
| C | 2.76723100  | -2.79166300 | -4.73938200 | H  | -1.94614400 | -4.58282300 | 1.52527300  |
| C | 1.75220600  | -1.84710300 | -4.56700300 | H  | 0.66041700  | -2.86634700 | -1.43215300 |
| C | 1.66686000  | -1.11561000 | -3.38196300 | H  | 0.95746400  | -5.08620900 | -2.46704300 |
| C | 2.60157000  | -1.30950900 | -2.34863200 | Pd | 0.00076800  | -0.06618900 | -0.48608500 |
| C | 3.62260600  | -2.25397500 | -2.53693600 | C  | -7.40267700 | 0.62526200  | -3.00870300 |
| C | 3.70125100  | -2.99156200 | -3.72170600 | C  | -7.60730000 | 0.98686500  | -1.65950100 |
| H | 2.82935100  | -3.36657800 | -5.65966900 | C  | -6.53578200 | 1.20466900  | -0.79995000 |
| H | 1.01863200  | -1.68300300 | -5.35195300 | C  | -5.24345500 | 1.04781100  | -1.31824800 |
| H | 0.86721600  | -0.39216000 | -3.25355600 | C  | -5.01511600 | 0.69138800  | -2.68054300 |
| H | 4.35974800  | -2.41945300 | -1.75861600 | C  | -6.12191100 | 0.47698900  | -3.52393400 |
| H | 4.49765600  | -3.72079300 | -3.84676200 | N  | -4.02100600 | 1.19008600  | -0.69713400 |
| C | -5.38779200 | -2.26543100 | 1.77183400  | C  | -3.01883000 | 0.96090800  | -1.63750900 |
| C | -4.91808700 | -2.11526900 | 0.46492900  | C  | -3.60057800 | 0.64595200  | -2.85649700 |
| C | -3.55076400 | -1.96928700 | 0.22622200  | C  | -3.83625300 | 1.60542200  | 0.68110000  |
| C | -2.63624800 | -1.97343500 | 1.29044400  | C  | -1.61274300 | 1.02998000  | -1.35380000 |
| C | -3.11555800 | -2.12135500 | 2.59849700  | C  | -0.49707400 | 1.57234400  | -1.67520500 |
| C | -4.48381400 | -2.26766100 | 2.83596300  | C  | 0.10033000  | 2.71032800  | -2.34246700 |
| H | -6.45272800 | -2.37665000 | 1.95909400  | O  | 0.46363200  | 3.74800700  | -1.79726000 |
| H | -5.61348400 | -2.09725600 | -0.36907300 | O  | 0.24213300  | 2.50700600  | -3.67007700 |
| H | -3.19796200 | -1.84332400 | -0.79385500 | C  | 0.85916600  | 3.58134600  | -4.40026200 |
| H | -2.42495400 | -2.10963000 | 3.43423500  | H  | -8.26385800 | 0.46395000  | -3.65189200 |

|   |             |            |             |   |             |             |             |
|---|-------------|------------|-------------|---|-------------|-------------|-------------|
| H | -8.62148200 | 1.09928300 | -1.28534200 | P | -1.39711700 | 0.56345200  | 2.35021500  |
| H | -6.69887300 | 1.48591600 | 0.23615200  | H | -5.85470800 | -1.67333200 | 1.96485200  |
| H | -5.97248200 | 0.20245100 | -4.56529700 | H | -7.09922700 | 0.12484100  | 3.13709900  |
| H | -3.05356200 | 0.40751600 | -3.75809700 | C | -2.23744000 | 1.62213100  | -5.49966300 |
| H | -4.02375700 | 2.68145800 | 0.79730500  | C | -2.05658900 | 1.98149000  | -4.16329500 |
| H | -4.52503300 | 1.05165200 | 1.32523400  | C | -2.46145600 | 1.14560700  | -3.10870400 |
| H | -2.82398600 | 1.37399300 | 1.00951500  | C | -3.04696000 | -0.09687800 | -3.44201100 |
| H | 0.88236700  | 3.24726000 | -5.43804800 | C | -3.20423200 | -0.45845300 | -4.78820400 |
| H | 0.27078100  | 4.49791800 | -4.30636600 | C | -2.81370000 | 0.39455200  | -5.81811300 |
| H | 1.87196800  | 3.76174400 | -4.03092500 | H | -1.92220700 | 2.30422200  | -6.28467700 |
|   |             |            |             | H | -1.58808000 | 2.93237200  | -3.94119700 |
|   |             |            |             | P | -2.12202800 | 1.67580000  | -1.34568200 |
|   |             |            |             | H | -3.65069000 | -1.42052800 | -5.02150100 |
|   |             |            |             | H | -2.95665700 | 0.09961400  | -6.85395900 |
|   |             |            |             | H | -4.82893800 | -6.05381600 | -2.01352100 |
|   |             |            |             | H | -3.34312100 | -6.88659300 | -2.45932200 |
|   |             |            |             | H | -2.26802000 | -6.18654500 | -0.32791600 |
|   |             |            |             | H | -3.78269000 | -7.01128800 | 0.02588200  |
|   |             |            |             | H | -3.55003400 | -4.89579800 | 1.38073300  |
|   |             |            |             | H | -4.95193900 | -4.83151300 | 0.31179600  |
|   |             |            |             | H | -2.22346300 | -3.54120000 | -0.18817800 |
|   |             |            |             | H | -4.75575100 | -3.37254800 | -1.88188300 |
|   |             |            |             | H | -3.51303900 | -4.64986900 | -3.59095600 |
|   |             |            |             | H | -2.10061800 | -4.75073000 | -2.54295400 |
|   |             |            |             | C | -6.03617200 | 3.84608800  | -0.02667100 |
|   |             |            |             | C | -6.05014300 | 3.03718200  | -1.16265700 |
|   |             |            |             | C | -4.89198900 | 2.37315000  | -1.57308700 |
|   |             |            |             | C | -3.70073000 | 2.50680100  | -0.84581900 |
|   |             |            |             | C | -3.69949300 | 3.31407600  | 0.30463900  |
|   |             |            |             | C | -4.85525700 | 3.98249500  | 0.70620000  |
|   |             |            |             | H | -6.93752500 | 4.36678900  | 0.28593300  |
|   |             |            |             | H | -6.96384500 | 2.92042500  | -1.73938300 |
|   |             |            |             | H | -4.92774000 | 1.74042400  | -2.45036100 |
|   |             |            |             | H | -2.78910500 | 3.44112400  | 0.88160800  |
|   |             |            |             | H | -4.83005400 | 4.61111500  | 1.59244700  |

**(S,R)-II**

|   |             |             |             |
|---|-------------|-------------|-------------|
| C | -3.73453100 | -6.02115500 | -1.91108000 |
| C | -3.36048900 | -6.10522700 | -0.42541900 |
| C | -3.85300300 | -4.86383400 | 0.32865900  |
| C | -3.31549400 | -3.55867300 | -0.29168500 |
| C | -3.66509500 | -3.46792900 | -1.79104400 |
| C | -3.20033400 | -4.72851200 | -2.54287700 |
| N | -3.85373300 | -2.39504400 | 0.41311000  |
| N | -3.08263200 | -2.29712500 | -2.44972700 |
| C | -3.24881800 | -1.90868500 | 1.52548300  |
| O | -2.24410500 | -2.42547000 | 2.02841400  |
| C | -3.63777000 | -1.06353100 | -2.44140500 |
| O | -4.62885000 | -0.75523900 | -1.76386000 |
| H | -4.45470000 | -1.76901400 | -0.12610200 |
| H | -2.15579400 | -2.39162400 | -2.86799000 |
| C | -5.32741600 | 1.30213000  | 3.50027300  |
| C | -3.94386100 | 1.38752700  | 3.32872700  |
| C | -3.21918200 | 0.37662400  | 2.68300500  |
| C | -3.93614200 | -0.73491200 | 2.17507700  |
| C | -5.32472500 | -0.80556300 | 2.34523900  |
| C | -6.02319800 | 0.20206600  | 3.00942000  |
| H | -5.85385900 | 2.10232600  | 4.01327800  |
| H | -3.42855500 | 2.26581600  | 3.69790300  |

|    |             |             |             |   |             |             |             |
|----|-------------|-------------|-------------|---|-------------|-------------|-------------|
| C  | 0.83861900  | 5.24369100  | -1.90475200 | C | 4.76429400  | -3.25073100 | 3.74524400  |
| C  | 1.31496100  | 3.95444000  | -1.66028700 | C | 3.52078600  | -3.48441900 | 3.15219000  |
| C  | 0.41339100  | 2.89863800  | -1.50280700 | C | 3.12699900  | -2.60709500 | 2.14607400  |
| C  | -0.97328700 | 3.11565100  | -1.57847100 | C | 3.92716700  | -1.54284500 | 1.70103300  |
| C  | -1.43914400 | 4.41931200  | -1.82641000 | C | 5.15826400  | -1.31576500 | 2.31334100  |
| C  | -0.53786800 | 5.47269600  | -1.99075400 | N | 1.91143600  | -2.58914400 | 1.42523700  |
| H  | 1.53576000  | 6.06922900  | -2.02374500 | C | 1.91245400  | -1.58114100 | 0.53829700  |
| H  | 2.37482500  | 3.73987900  | -1.56028600 | C | 3.22084300  | -0.86141600 | 0.57195800  |
| H  | 0.81297300  | 1.91040300  | -1.30053300 | C | 0.81665400  | -3.52414400 | 1.65275600  |
| H  | -2.50478500 | 4.61520200  | -1.88839000 | C | 0.82225700  | -1.19685200 | -0.25760700 |
| H  | -0.91474400 | 6.47452600  | -2.18117400 | C | 0.25599000  | -0.89844500 | -1.36735100 |
| C  | 0.81941500  | -1.72674400 | 5.75005600  | C | 0.29181400  | -1.14245100 | -2.80638400 |
| C  | 1.52120100  | -0.97056500 | 4.80805100  | O | -0.33239500 | -2.02197800 | -3.38574000 |
| C  | 0.83316500  | -0.32180400 | 3.78208100  | O | 1.07545700  | -0.25757700 | -3.44186900 |
| C  | -0.56363400 | -0.41719300 | 3.68461300  | C | 1.14220800  | -0.38074600 | -4.87736000 |
| C  | -1.25931600 | -1.17867400 | 4.63205200  | H | 6.52990900  | -2.01690000 | 3.81485700  |
| C  | -0.56994000 | -1.82818900 | 5.65843200  | H | 5.10896900  | -3.91182900 | 4.53528400  |
| H  | 1.35296700  | -2.23108600 | 6.55140800  | H | 2.89493800  | -4.31112000 | 3.47144900  |
| H  | 2.60239100  | -0.88760100 | 4.86639700  | H | 5.79766100  | -0.50343000 | 1.98581600  |
| H  | 1.38867400  | 0.27328200  | 3.06121800  | H | 3.05878400  | 0.22181400  | 0.68701300  |
| H  | -2.33686200 | -1.27413800 | 4.56718000  | H | 1.00357100  | -4.46135900 | 1.11673300  |
| H  | -1.12373300 | -2.41386200 | 6.38780200  | H | 0.73982300  | -3.72258600 | 2.72369600  |
| C  | -0.13291000 | 4.79087200  | 3.87782100  | H | -0.12262400 | -3.07804800 | 1.32401200  |
| C  | -0.65200600 | 3.85687900  | 4.78033800  | H | 1.81269000  | 0.41601500  | -5.19745900 |
| C  | -1.04784500 | 2.59674300  | 4.33539700  | H | 1.54522300  | -1.35755600 | -5.15593500 |
| C  | -0.95264600 | 2.25465400  | 2.97319200  | H | 0.14921600  | -0.25356500 | -5.31313600 |
| C  | -0.41196000 | 3.19250600  | 2.08383100  | C | 3.98090100  | -0.86397400 | -0.88363100 |
| C  | -0.00625700 | 4.45386300  | 2.53137700  | C | 5.11889900  | 0.11958100  | -0.85076700 |
| H  | 0.18446200  | 5.76904000  | 4.22920200  | C | 4.73894200  | 1.48734800  | -0.75375800 |
| H  | -0.73542900 | 4.10570900  | 5.83502500  | O | 3.51940300  | 1.80595800  | -0.60937800 |
| H  | -1.41693900 | 1.86988800  | 5.05324800  | C | 4.26756500  | -2.26287200 | -1.40249900 |
| H  | -0.28482700 | 2.93344800  | 1.03912400  | C | 5.16973200  | -3.15190300 | -0.79499700 |
| H  | 0.41658700  | 5.15950600  | 1.82196300  | C | 5.37221500  | -4.43161100 | -1.31461900 |
| Pd | -0.87836700 | 0.12795000  | 0.02477200  | C | 4.68368000  | -4.85432800 | -2.45289500 |
| C  | 5.56796400  | -2.17774600 | 3.33709300  | C | 3.79420700  | -3.97886500 | -3.07635100 |

|   |            |             |             |   |             |             |             |
|---|------------|-------------|-------------|---|-------------|-------------|-------------|
| C | 3.59394400 | -2.70011100 | -2.55380800 | H | -4.33708800 | -1.41463900 | 0.97557100  |
| C | 6.45356500 | -0.32300600 | -0.75148600 | H | -2.22808000 | -3.56698000 | -1.02255400 |
| N | 7.55344600 | -0.71685200 | -0.65291900 | C | -4.82280600 | 3.19611000  | 2.66168100  |
| C | 5.74599500 | 2.60769900  | -0.77521100 | C | -3.45762200 | 3.05507200  | 2.39909500  |
| C | 5.43670200 | 3.77555700  | -0.05874600 | C | -2.85735000 | 1.79382700  | 2.28176900  |
| C | 6.30329700 | 4.86655600  | -0.05930700 | C | -3.68188300 | 0.65135300  | 2.42887100  |
| C | 7.48983600 | 4.81722300  | -0.79637200 | C | -5.05283100 | 0.80336000  | 2.66824600  |
| C | 7.79828800 | 3.66933400  | -1.52851800 | C | -5.62786500 | 2.06849100  | 2.78794000  |
| C | 6.93562300 | 2.57170400  | -1.51803300 | H | -5.24986100 | 4.19087400  | 2.75798900  |
| H | 3.20973300 | -0.41415400 | -1.51456400 | H | -2.85830100 | 3.94924200  | 2.27431100  |
| H | 5.73530900 | -2.84304700 | 0.07479000  | P | -1.06984200 | 1.62138000  | 1.76813400  |
| H | 6.08143600 | -5.09689100 | -0.82885500 | H | -5.66480600 | -0.08589700 | 2.78615900  |
| H | 4.84664700 | -5.85116100 | -2.85481200 | H | -6.69215200 | 2.16636800  | 2.98281000  |
| H | 3.25754200 | -4.28646100 | -3.97058500 | C | -2.33644200 | -1.62169800 | -5.40421300 |
| H | 2.91601900 | -2.01620000 | -3.05505200 | C | -2.15508700 | -0.58515600 | -4.48651000 |
| H | 4.50337900 | 3.80541500  | 0.49457900  | C | -2.54272600 | -0.71138500 | -3.14241600 |
| H | 6.05377500 | 5.75737000  | 0.51270400  | C | -3.11799900 | -1.93590700 | -2.73561700 |
| H | 8.16660900 | 5.66825500  | -0.80244700 | C | -3.28103000 | -2.97679800 | -3.65955000 |
| H | 8.71356700 | 3.62573400  | -2.11348600 | C | -2.90145200 | -2.82611200 | -4.99181600 |
| H | 7.18837900 | 1.68941900  | -2.09484600 | H | -2.03341700 | -1.48024000 | -6.43827300 |

**(S)-III**

|   |             |             |             |   |             |             |             |
|---|-------------|-------------|-------------|---|-------------|-------------|-------------|
| C | -3.87441100 | -6.00832600 | 1.81594800  | H | -1.70196800 | 0.33707800  | -4.82906900 |
| C | -3.45179500 | -5.28021600 | 3.09864100  | P | -2.18989800 | 0.66982500  | -1.93190200 |
| C | -3.87032600 | -3.80551200 | 3.04953700  | H | -3.71825600 | -3.91167900 | -3.32190300 |
| C | -3.30503200 | -3.08586800 | 1.80844200  | H | -3.04518300 | -3.64167900 | -5.69514300 |
| C | -3.71640800 | -3.81437700 | 0.51284400  | H | -4.97228400 | -6.03993000 | 1.76002800  |
| C | -3.32076400 | -5.30111500 | 0.57141800  | H | -3.53172000 | -7.05019600 | 1.82972900  |
| N | -3.75750500 | -1.69333100 | 1.76967400  | H | -2.36041600 | -5.34868600 | 3.21520700  |
| N | -3.13681800 | -3.22912800 | -0.69749800 | H | -3.89095600 | -5.76669700 | 3.97818900  |
| C | -3.11243100 | -0.74255600 | 2.48856500  | H | -3.52908300 | -3.27058200 | 3.94162600  |
| O | -2.16134900 | -0.99376000 | 3.23635100  | H | -4.96727300 | -3.73121900 | 3.02709000  |
| C | -3.67719000 | -2.17856000 | -1.35498700 |   |             |             |             |
| O | -4.62898400 | -1.50955900 | -0.92582600 |   |             |             |             |

|   |             |             |             |    |             |             |             |
|---|-------------|-------------|-------------|----|-------------|-------------|-------------|
| H | -2.20976900 | -3.08197900 | 1.87326500  | C  | -0.74334700 | 1.35608800  | 4.60975700  |
| H | -4.80691200 | -3.73332700 | 0.40879400  | C  | 0.03194600  | 1.26166100  | 5.76781600  |
| H | -3.66908200 | -5.79505000 | -0.34361700 | H  | 2.02592700  | 1.14392600  | 6.58517800  |
| H | -2.22309200 | -5.37229900 | 0.56985300  | H  | 3.12613000  | 1.23108400  | 4.35263600  |
| C | -6.15651300 | 3.11730300  | -1.75576900 | H  | 1.76259200  | 1.41417200  | 2.30656900  |
| C | -6.12149400 | 1.92696800  | -2.48267700 | H  | -1.82420200 | 1.37083800  | 4.68809200  |
| C | -4.95068500 | 1.16837200  | -2.53924200 | H  | -0.45728800 | 1.21742100  | 6.73753900  |
| C | -3.79687600 | 1.59010200  | -1.86370900 | C  | 0.31315700  | 5.96954100  | 0.74567400  |
| C | -3.84483500 | 2.78415400  | -1.12705300 | C  | 0.03868000  | 5.62477500  | 2.07294300  |
| C | -5.01297700 | 3.54444200  | -1.07806900 | C  | -0.38001900 | 4.33321300  | 2.39009600  |
| H | -7.06851800 | 3.70722800  | -1.71566700 | C  | -0.54779900 | 3.36478300  | 1.38242100  |
| H | -7.00727500 | 1.58256400  | -3.00997100 | C  | -0.25437700 | 3.72011300  | 0.05972000  |
| H | -4.94436000 | 0.24287700  | -3.10172400 | C  | 0.17154500  | 5.01328500  | -0.25905100 |
| H | -2.96330800 | 3.13301100  | -0.59849900 | H  | 0.64553900  | 6.97520500  | 0.50143400  |
| H | -5.02850000 | 4.46750500  | -0.50518000 | H  | 0.16002500  | 6.36017900  | 2.86410200  |
| C | 0.47270200  | 3.50504900  | -4.52896900 | H  | -0.56634900 | 4.07319100  | 3.42785600  |
| C | 1.04257900  | 2.49203200  | -3.75502300 | H  | -0.33419700 | 2.97768600  | -0.72484300 |
| C | 0.23024900  | 1.65522500  | -2.98817800 | H  | 0.40146900  | 5.25942600  | -1.29185400 |
| C | -1.16543900 | 1.81665900  | -2.98074800 | Pd | -0.76619800 | 0.02878600  | -0.02641400 |
| C | -1.72761800 | 2.83628400  | -3.76650500 | C  | 5.99593000  | -2.11358300 | 3.42839000  |
| C | -0.91368400 | 3.67308400  | -4.53341800 | C  | 5.09165000  | -2.34721700 | 4.48606400  |
| H | 1.10466300  | 4.16121600  | -5.12165500 | C  | 3.71817100  | -2.28432700 | 4.28476100  |
| H | 2.12055100  | 2.35993400  | -3.73149400 | C  | 3.26520800  | -1.97191800 | 2.99575200  |
| H | 0.68392900  | 0.88286700  | -2.37593200 | C  | 4.15905600  | -1.74059200 | 1.91227500  |
| H | -2.80261900 | 2.98120500  | -3.78076800 | C  | 5.54722700  | -1.81472400 | 2.14897000  |
| H | -1.36658600 | 4.45814200  | -5.13351800 | N  | 1.97393500  | -1.84323400 | 2.53448500  |
| C | 1.42491500  | 1.21957500  | 5.68277000  | C  | 2.01598100  | -1.56659800 | 1.17250600  |
| C | 2.04368200  | 1.27396700  | 4.43123900  | C  | 3.34874500  | -1.49425800 | 0.75075300  |
| C | 1.26999800  | 1.36947700  | 3.27425100  | C  | 0.78949400  | -2.13512000 | 3.32172200  |
| C | -0.13083000 | 1.41206500  | 3.35155100  | C  | 0.84493300  | -1.32852600 | 0.37139500  |

|   |             |             |             |           |             |             |             |
|---|-------------|-------------|-------------|-----------|-------------|-------------|-------------|
| C | 0.27491500  | -1.61225600 | -0.74625400 | C         | 4.69944200  | 5.03925300  | -0.23151300 |
| C | 0.26272700  | -2.61369400 | -1.79969500 | C         | 5.83156500  | 5.23069000  | -1.02652700 |
| O | -0.46237300 | -3.60155800 | -1.82900700 | C         | 6.38517400  | 4.14687200  | -1.71121800 |
| O | 1.15511000  | -2.33680900 | -2.76922100 | C         | 5.81945500  | 2.87836100  | -1.59832700 |
| C | 1.24544500  | -3.30039900 | -3.83632800 | H         | 2.88046300  | -0.95354900 | -1.22821800 |
| H | 7.06407700  | -2.17191400 | 3.61860500  | H         | 4.32095300  | -3.78893600 | 0.15036900  |
| H | 5.47539300  | -2.58278900 | 5.47522300  | H         | 5.26603600  | -5.63350000 | -1.19114900 |
| H | 3.02238400  | -2.46789200 | 5.09763300  | H         | 5.92992400  | -5.25133700 | -3.55944900 |
| H | 6.25794900  | -1.64487600 | 1.34702900  | H         | 5.63123000  | -2.99051700 | -4.56539900 |
| H | 2.31583400  | 0.63815200  | -0.10826700 | H         | 4.68107300  | -1.15145600 | -3.21834300 |
| H | 0.70451900  | -3.21392200 | 3.50914500  | H         | 3.24549900  | 3.63080400  | 0.49574400  |
| H | 0.84270400  | -1.60913300 | 4.27855800  | H         | 4.25624400  | 5.87650200  | 0.30083200  |
| H | -0.10108600 | -1.78775100 | 2.80246700  | H         | 6.27651200  | 6.21818900  | -1.11635100 |
| H | 2.06298900  | -2.95135300 | -4.46600000 | H         | 7.25814000  | 4.28761400  | -2.34247700 |
| H | 1.47212200  | -4.29077400 | -3.43519300 | H         | 6.25428400  | 2.05229800  | -2.14801300 |
| H | 0.30607200  | -3.33403800 | -4.39382200 | <b>2a</b> |             |             |             |
| C | 3.79415400  | -1.17451800 | -0.66052500 | C         | -1.25879500 | -0.77239200 | 0.04486000  |
| C | 4.64293700  | 0.11547900  | -0.71601400 | C         | -0.07234400 | -0.13198500 | -0.16494300 |
| C | 4.04821600  | 1.34564300  | -0.64721800 | C         | 1.17776700  | -0.99020300 | -0.11966700 |
| O | 2.70982200  | 1.46727700  | -0.43573100 | O         | 1.06210300  | -2.20694200 | -0.20326000 |
| C | 4.43671000  | -2.33596800 | -1.43265100 | C         | -2.64004600 | -0.31664600 | 0.05783100  |
| C | 4.60530800  | -3.60916000 | -0.88057600 | C         | -3.06584100 | 1.00832600  | -0.18425500 |
| C | 5.13907900  | -4.65299700 | -1.64295700 | C         | -4.41881500 | 1.32985800  | -0.14561400 |
| C | 5.51058400  | -4.44053200 | -2.96951200 | C         | -5.37629600 | 0.34907500  | 0.13244400  |
| C | 5.34235600  | -3.17245300 | -3.53318800 | C         | -4.97398700 | -0.96657500 | 0.37404000  |
| C | 4.80868900  | -2.13465900 | -2.77155300 | C         | -3.62248000 | -1.29284400 | 0.33700800  |
| C | 6.05854000  | -0.01053000 | -0.77067500 | C         | 0.01984800  | 1.25392200  | -0.49232900 |
| N | 7.21406200  | -0.17022300 | -0.80220200 | N         | 0.09131300  | 2.38141800  | -0.77911000 |
| C | 4.69095400  | 2.67143300  | -0.78614000 | C         | 2.53220400  | -0.37412600 | 0.02027100  |
| C | 4.12892300  | 3.77386300  | -0.11567500 | C         | 3.62344600  | -1.10609700 | -0.47958400 |



|   |             |             |             |   |             |             |             |
|---|-------------|-------------|-------------|---|-------------|-------------|-------------|
| C | 4.91963000  | -0.61905200 | -0.34766600 | H | -5.71133000 | -1.73435700 | 0.59007000  |
| C | 5.14606000  | 0.59456600  | 0.30959900  | H | -3.30849400 | -2.31653000 | 0.52436900  |
| C | 4.07147900  | 1.31587400  | 0.83206700  | H | 3.43016400  | -2.05498600 | -0.96880900 |
| C | 2.76851700  | 0.83974700  | 0.68433900  | H | 5.75478600  | -1.18492000 | -0.75104700 |
| H | -1.13022500 | -1.83620700 | 0.23692600  | H | 6.15863900  | 0.97428500  | 0.41693300  |
| H | -2.34379700 | 1.78452700  | -0.40332900 | H | 4.24472300  | 2.25208200  | 1.35489900  |
| H | -4.72934700 | 2.35348200  | -0.33468700 | H | 1.94743600  | 1.40928200  | 1.10407500  |
| H | -6.43064900 | 0.61027300  | 0.16003400  |   |             |             |             |

## Reference

- M. J. Frisch, G. W. Trucks, H. B. Schlegel, G. E. Scuseria, M. A. Robb, J. R. Cheeseman, G. Scalmani, V. Barone, B. Mennucci, G. A. Petersson, H. Nakatsuji, M. Caricato, X. Li, H. P. Hratchian, A. F. Izmaylov, J. Bloino, G. Zheng, J. L. Sonnenberg, M. Hada, M. Ehara, K. Toyota, R. Fukuda, J. Hasegawa, M. Ishida, T. Nakajima, Y. Honda, O. Kitao, H. Nakai, T. Vreven, J. A., Jr. Montgomery, J. E. Peralta, F. Ogliaro, M. Bearpark, J. J. Heyd, E. Brothers, K. N. Kudin, V. N. Staroverov, R. Kobayashi, J. Normand, K. Raghavachari, A. Rendell, J. C. Burant, S. S. Iyengar, J. Tomasi, M. Cossi, N. Rega, J. M. Millam, M. Klene, J. E. Knox, J. B. Cross, V. Bakken, C. Adamo, J. Jaramillo, R. Gomperts, R. E. Stratmann, O. Yazyev, A. J. Austin, R. Cammi, C. Pomelli, J. W. Ochterski, R. L. Martin, K. Morokuma, V. G. Zakrzewski, G. A. Voth, P. Salvador, J. J. Dannenberg, S. Dapprich, A. D. Daniels, O. Farkas, J. B. Foresman, J. V. Ortiz, J. Cioslowski and D. J. Fox, *Gaussian 09*, revision D.01; Gaussian, Inc.: Wallingford, CT, 2009.
- (a) A. D. Becke, *Phys. Rev. A*, 1988, **38**, 3098; (b) A. D. Becke, *J. Chem. Phys.*, 1993, **98**, 5648; (c) S. Grimme, S. Ehrlich and L. Goerigk, *J. Comput. Chem.*, 2011, **32**, 1456.
- A. V. Marenich, C. J. Cramer and D. G. Truhlar, *J. Phys. Chem. B*, 2009, **113**, 6378.
- Y. Zhao and D. G. Truhlar, *J. Chem. Phys.*, 2006, **125**, 194101.
